# Supplementary material for: Long Intergenic Non-Coding RNAs of Human Chromosome 18: Focus on Cancers
Source: MDPI journal article supplement (doi:10.3390/biomedicines12030544), 2024-02-28
Supplement: s1 [file s1]

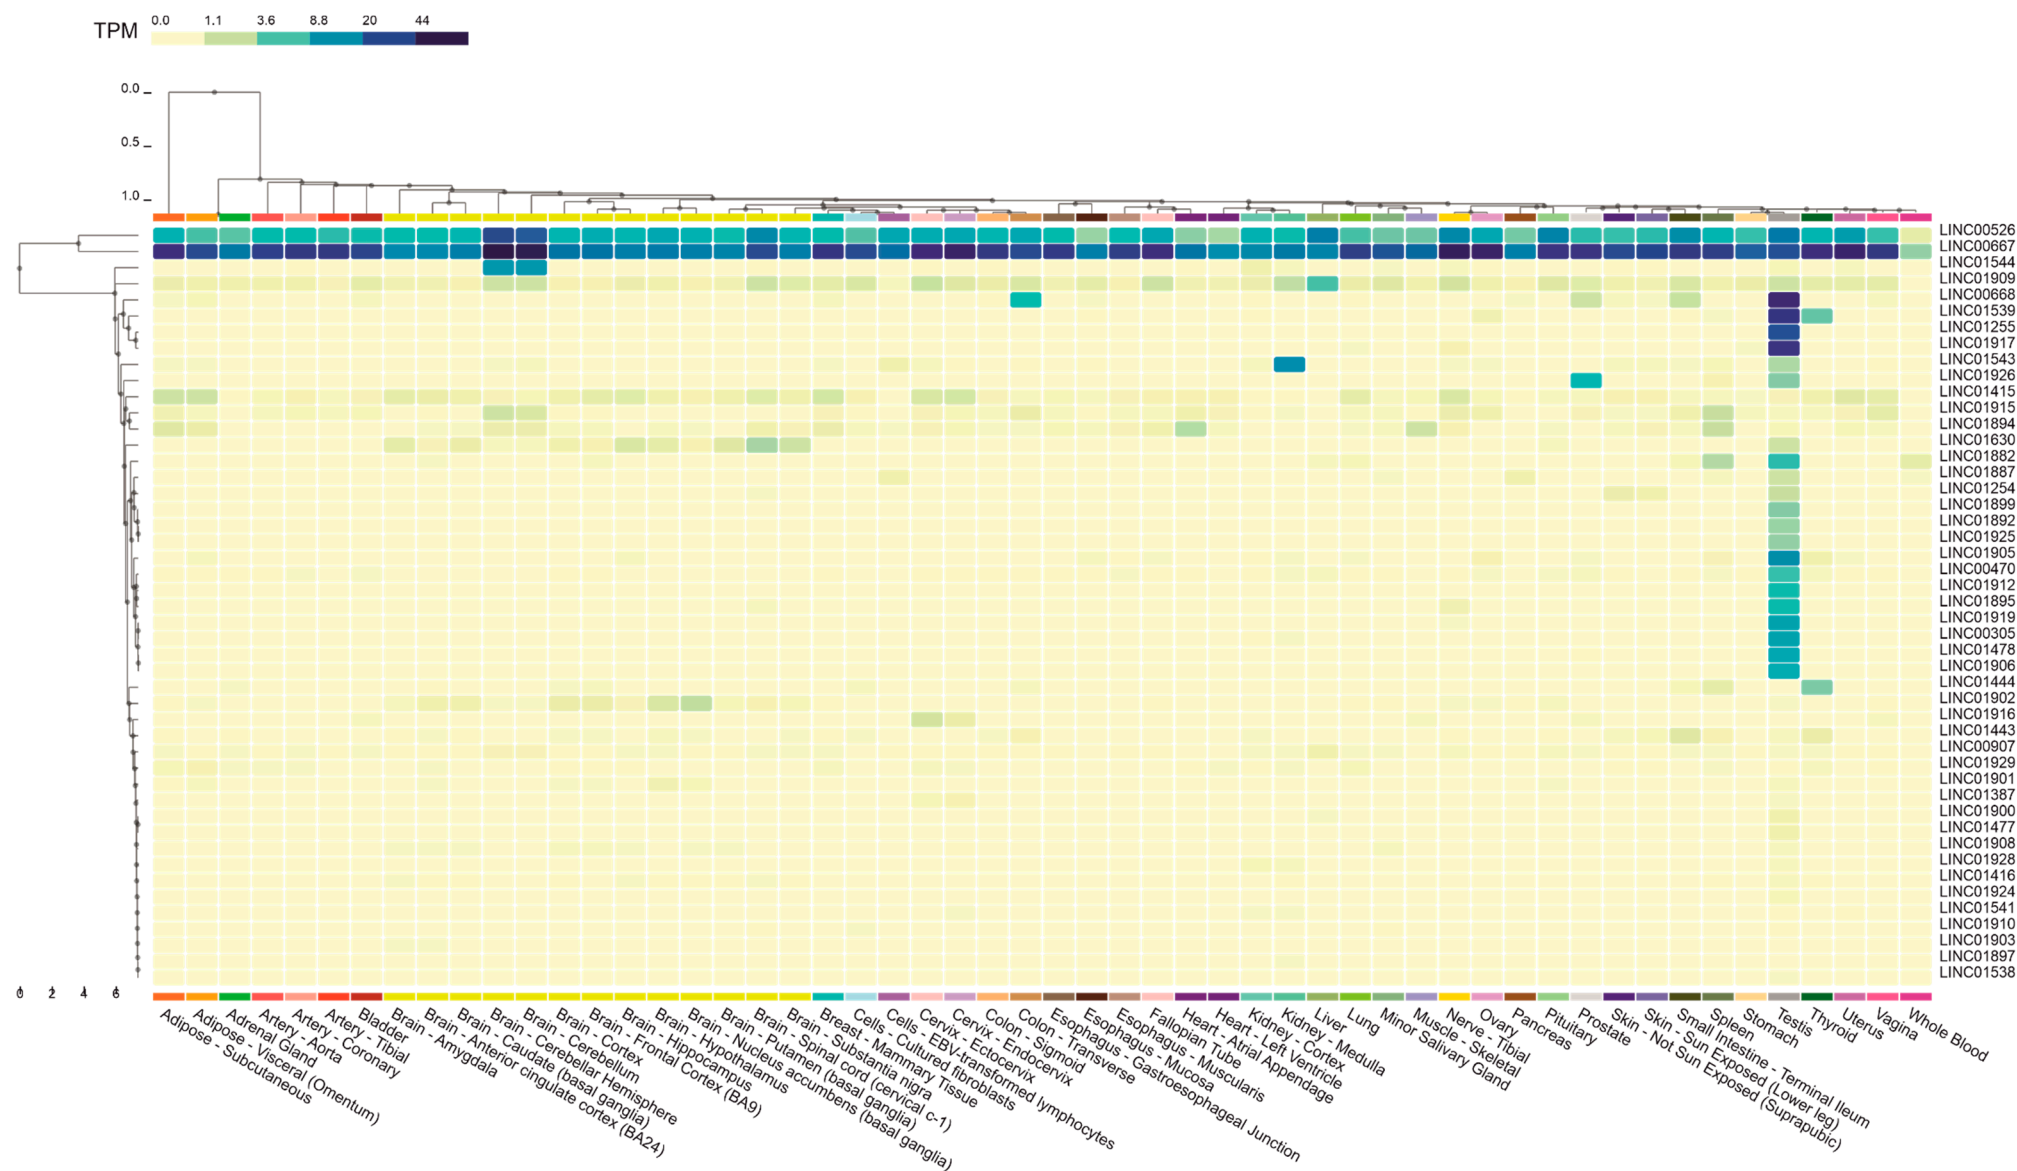

Figure S2. Gene expression patterns of lincRNAs of human chromosome 18 in normal tissues (this image was created using ‘GTEx Multi Gene Query’ data analysis interface of the Gene Tissue Expression Portal, <https://www.gtexportal.org/home/>). Abbreviations: TPM – Transcript per Million.
