# Supplementary material for: Long Intergenic Non-Coding RNAs of Human Chromosome 18: Focus on Cancers
Source: MDPI journal article supplement (doi:10.3390/biomedicines12030544), 2024-02-28
Supplement: s1 [file s1]

Table S9. Gene expression patterns and functional terms for predicted transcriptional regulators (transcriptional factors) of linc-genes encoding lincRNAs of human chromosome 18

| Group No | Transcriptional regulators                                                                                                                                                                                                                                                                          | Gene expression pattern*                                                                                       | Reactome terms**                                                                                                                                                               |
|----------|-----------------------------------------------------------------------------------------------------------------------------------------------------------------------------------------------------------------------------------------------------------------------------------------------------|----------------------------------------------------------------------------------------------------------------|--------------------------------------------------------------------------------------------------------------------------------------------------------------------------------|
| Group I  | POLR2A, RAD21, PKNOX1, SP1, YY1, REST                                                                                                                                                                                                                                                               | Up-regulation in glioblastoma, low-grade glioma, pancreatic adenocarcinoma, stomach adenocarcinoma and thymoma | 'estrogen-dependent gene expression', 'activation of anterior HOX genes in hindbrain development during early embryogenesis'                                                   |
| Group II | CREM, NR2F1, SIN3A, ZNF335, CTCF, MAX, BHLHE40, L3MBTL2, TBP, MNT, EGR1, TAF1, ZBTB26, PRDM1, ATF1, NRF1, ZNF384, ZFH2, SP7, ZBTB11, CTBP1, CEBPB, BCL6, ZGPAT, MEIS2, GABPA, NCOR1, DPF2, ZFP37, KLF1, ZXDB, ZBTB17, GLIS2, ZNF600, ZNF341, ZNF398, TCF12, EP300, SMAD4, CHD2, IKZF1, ZNF316, SMC3 | Up-regulation in pancreatic adenocarcinoma and thymoma                                                         | 'estrogen-dependent gene expression', 'activation of anterior HOX genes in hindbrain development during early embryogenesis', 'FOXO-mediated transcription', 'circadian clock' |

\*tumor/normal tissue expression patterns of all genes in a group were analyzed using the GEPIA2 [S1] at following settings:  $|\log_2FC|$  cut-off value = 1 and p-value <0.05, respectively.

\*\*functional enrichment analysis (Reactome terms) was performed using the PathwAX II web-based tool (adj. p-value <0.01). PathwAX II, a web-server for pathway annotation based on crosstalk derived through the FunCoup genome wide functional association networks [S2].

## References

- [S1] Tang Z, Kang B, Li C, Chen T, Zhang Z. GEPIA2: an enhanced web server for large-scale expression profiling and interactive analysis. *Nucleic Acids Res.* 2019;47(W1):W556-W560.
- [S2] Ogris C, Castresana-Aguirre M, Sonnhammer ELL. PathwAX II: network-based pathway analysis with interactive visualization of network crosstalk. *Bioinformatics.* 2022;38(9):2659-2660.
