# Supplementary material for: Long Intergenic Non-Coding RNAs of Human Chromosome 18: Focus on Cancers
Source: MDPI journal article supplement (doi:10.3390/biomedicines12030544), 2024-02-28
Supplement: s1 [file s1]

Table S2. Gene fusions involving linc-genes of chromosome 18

| Gene fusions                              | Cell line          | Cancer associations of a perturbed gene by lincRNA                                  | Cytogenetic location |
|-------------------------------------------|--------------------|-------------------------------------------------------------------------------------|----------------------|
| <i>LINC00526--RAD54L</i>                  | CAL78              | *Breast, lung, bladder cancer                                                       | 18p11.31-1p34.1      |
| <i>LINC00526--IDH3B</i>                   | DND41              | Not found                                                                           | 18p11.31-20p13       |
| <i>LINC00907--PIK3C3</i>                  | Y79                | *Esophageal, colon cancer                                                           | 18q12.3-18q12.3      |
| <i>LINC01416--LMAN1</i>                   | SNU1214            | Not found                                                                           | 18q21.2-18q21.32     |
| <i>LINC01443--ESCO1</i>                   | NCIH2887           | Not found                                                                           | 18p11.21-18q11.2     |
| <i>LINC01630--SMAD4</i>                   | SNU738, KP4        | *Pancreatic, colon, gastric cancer;<br>**Tumor suppressor gene, hallmarks of cancer | 18q21.2-18q21.2      |
| <i>LINC01630--ELAC1</i>                   | MDAMB468, COLO678  | Not found                                                                           | 18q21.2-18q21.2      |
| <i>LINC01899--MBP</i>                     | NIHOVCAR3, ONCODG1 | *Breast cancer, melanoma, gastric cancer                                            | 18q22.3-18q23        |
| <i>LINC01902--PFN2</i>                    | SNU46              | *Breast cancer, sarcoma                                                             | 18q12.3-3q25.1       |
| <i>LINC01902--ANKUB1</i>                  | SNU46              | Not found                                                                           | 18q12.3-3q25.1       |
| <i>LINC01915--RALBP1</i>                  | JVE015             | *Breast, lung, oral cancer                                                          | 18q11.2-18p11.22     |
| <i>LINC01915--SDHA</i>                    | CCSW1              | *Gliomas;<br>**Tumor suppressor gene, hallmarks of cancer                           | 18q11.2-5p15.33      |
| <i>LINC01917--MBD2</i>                    | MIAPACA2           | *Breast, prostate, colon cancer                                                     | 18q21.2-18q21.2      |
| <i>LINC01926--ZNF532</i>                  | SKOV3              | Not found                                                                           | 18q21.32-18q21.32    |
| <i>LINC01928--YES1</i>                    | GIMEN              | *Lung, gastric cancer                                                               | 18p11.21-18p11.32    |
| <i>LINC02582--RCC1</i>                    | ICC15, LS180       | *Lung cancer                                                                        | 18q22.3-1p35.3       |
| <i>LINC02582--SNHG3<sup>#</sup></i>       | ICC15, LS180       | Not found                                                                           | 18q22.3-1p35.3       |
| <i>LINC02582--LRRC75A-AS1<sup>#</sup></i> | PATU8902, G415     | Not found                                                                           | 18q22.3-17p11.2      |
| <i>LINC02864--CCDC102B</i>                | NCIH1963           | Not found                                                                           | 18q22.3-18q22.1      |

\*MalaCards: a human disease database [S1] (<http://www.malacards.org/>) was used to search for associations of a perturbed gene with cancers (direct or indirect involvement in cancer biology, cancer promotion or suppression, drug sensitivity or resistance); cancer associations were selected by MalaCards InFormaTion Scores (MIFTS) > 70.

\*\*The Cancer Gene Census of the Catalogue of Somatic Mutations in Cancer (COSMIC) web portal [S2] (<https://cancer.sanger.ac.uk/census>).

<sup>#</sup>non-coding RNAs.

## References

[S1] Rappaport N, Twik M, Plaschkes I, Nudel R, Iny Stein T, Levitt J, Gershoni M, Morrey CP, Safran M, Lancet D. MalaCards: an amalgamated human disease compendium with diverse clinical and genetic annotation and structured search. *Nucleic Acids Res.* 2017;45(D1):D877-D887.

[S2] Sondka Z, Bamford S, Cole CG, Ward SA, Dunham I, Forbes SA. The COSMIC Cancer Gene Census: describing genetic dysfunction across all human cancers. *Nat Rev Cancer.* 2018;18(11):696-705.
