# Supplementary material for: Long Intergenic Non-Coding RNAs of Human Chromosome 18: Focus on Cancers
Source: MDPI journal article supplement (doi:10.3390/biomedicines12030544), 2024-02-28
Supplement: s1 [file s1]

**Table S21. Nucleotide sequences of lincRNAs of human chromosome 18**

DNA

>NR\_027245.2 Homo sapiens long intergenic non-protein coding RNA 305  
(LINC00305), transcript variant 2, long non-coding RNA

AATGATGGACTCTGATTTCCACACCCCTTTCTCTGTGAACTTGTCTCCAATTTAGTCTGTCAAGGTCCCTTTCTTGTG  
AGTTAATTTCTCCCTAGTGCTACTTCTCAGATTGGCCAGTGACTCACAGAGTGGCACAAGTACAAATCCAGCCTGCC  
TTGCATCCAACACAGATTCCAGGACCACTGAAACCAGCTGAGGCATCCTGAAAGCCTAAGATTGACCACACCAGAGG  
AACCAGACTGCCCTTCACAAGGATGGAAATTATCTGGTTCCACCCCTGGATATGATCAACCTTCATAGACTGTGCAT  
TATACATGCCATCTCTGCGACCTGCAAAGATGAAAAGGGAAAGCAGGAGATGGAACTGGTCAGCAGCCTTCTGGTT  
TATCAGCCACACTTACAAAGGTCAAATGTGCAAAGCGTCAGAAGACAGTGGTTAGAGTGAGATTCTACATGCTCTCA  
ATGAAGAATAAAGCATGCAGGAAGAACCCTTTCAAAGGTTACAACCAGAGACCTGAAGGAAGCAAGGAAGAAAGCCA  
CATGGTTGTCAAAGAGAAGAGGAAAGGAGATCACTAAGCTGGATGACGTTTTCTGTTTCTTTGAAAACAGAGAAGAT  
GACAAGTTAGGGAGAGATCAGAGGTCATACTGTGAAGCACCTTTGGATAAACCGGCAGGGACTTTGGATTTTCTTTTT  
GAATATAAGCATAATCCATTGAAAGGTCTCATGCAGGGAAGTGGCAAAACACTTTTAAAATTTTTCATCTTTTCTTT  
CTGAAGCAGAGTTCACTCTCCATTTATTTGTCTTCTTTGATATCTCTCAATAGAATGTTGCAGTTTTAGTATTCTCC  
TATTAACATTTGTTTAACTTTAAAAAAAAAAAAAAAAAAAA

RNA

>NR\_027245.2 Homo sapiens long intergenic non-protein coding RNA 305  
(LINC00305), transcript variant 2, long non-coding RNA

AAUGAUGGACUCUGAUUUCCACACCCCUUCCUGUGAACUUGUCUCCAUUUAGUCUGUCAAGGUCCCUUUCUUGUG  
AGUUAUUUUUCUCCCUAGUGCUACUUCUCAGAUUGGCCAGUGACUCACAGAGUGGCACAAGUACAAUCCAGCCUGCC  
UUGCAUCCAACACAGAUUCCAGGACCACUGAAACCAGCUGAGGCAUCCUGAAAGCCUAAGAUUGACCACACCAGAGG  
AACCAGACUGCCCUUCACAAGGAUGGAAAUUAUCUGGUUCCACCCUGGAUAUGAUCAACCUUCAUAGACUGUGCAU  
UAUACAUGCCAUCUCUGCGACCUGCAAAGAUGAAAAGGGAAAGCAGGAGAUGGAAACUGGUCAGCAGCCUUCUGGUU  
UAUCAGCCACACUUACAAAGGUCAAAUGUGCAAAGCGUCAGAAGACAGUGGUUAGAGUGAGAUUCUACAUGCUCUCA  
AUGAAGAAUAAAAGCAUGCAGGAAGAACCUUUCAAAGGUUACAACCAGAGACCUGAAGGAAGCAAGGAAGAAAGCCA  
CAUGGUUGUCAAAAGAGAAGAGGAAAGGAGAUCAUAAGCUGGAUGACGUUUUCUGUUUCUUUGAAAACAGAGAAGAU  
GACAAGUUAGGGAGAGAUCAAGAGGUCAUACUGUGAAGCACCUUUGGAUAAACCGGCAGGGACUUUGGAUUUUCUUUUU  
GAAUAUAAGCAUAAUCCAUUGAAAGGUCUCAUGCAGGGAAGUGGCAAAACACUUUUAAAAUUUUUCAUCUUUUCUUU  
CUGAAGCAGAGUUCACUCUCCAUUUAUUUGUCUUCUUUGAUUUCUCAUAGAAGUUGCAGUUUUAGUAUUCUCC  
UAUUAAAUAUUUGUUUAACUUUAAAAAAAAAAAAAAAAAAAA

## DNA

>NR\_023925.1 Homo sapiens long intergenic non-protein coding RNA 470 (LINC00470), transcript variant 1, long non-coding RNA  
AATGCCTTAAAGAAAGGACTGATCTCCCCTGAAGAAGAGAGAATTCTGCCTCTAGATTGCTTACAATTTG  
AACTGGAACATCAGCTGTTCTCTAGGTCTTAAGTCTGCTGCTCTAACCTACAAATTTTGGACATGCCAAT  
CTCCACAGTCACATGGGCCAATTCCCTTAGTTTCTCTGGAGAATCCTGACTAATGTATGCAATGTCTTTAT  
TTCATCCTCATTCTTAAAGGATATTTTCATCAGCAACACCACACCCTCCTGATCACCATAGCTTTATGAT  
CTGAGCTTTCATCTGGTATCATTTCCCTTTCCGCTCTGAAGAACTTGCTTTCCCTTGCAACAACAAGAAACAA  
ATTTATTAGCTAACCTAACCACTAATGACGCAAGAGACAATTCTAAGGACTTTCAAACAGCAAAGTAGG  
AGCAGCTGCTACCTCTAGGGATGAGGGAGAAAACCAAAAATGCATACAAAACCATTTGCATGAAAAGTGA  
CTGGATTTGTACATAGCGTCAGGAGATGTGCGTAGTGTCAAAGTATCTCATCACACATTACTTGATAATT  
ACAAATGAGAAAAATGAACCTTCACAGTGGCAAGACTTGACTTCTACCTCTTTCAAAGATGCAATTGT  
CCAATTATTGGTGAAATTTGTCATTTTCATGCTATTGGCTATTTGAAATTCCTCCTCTAATTTTCAGAATAAA  
TCACTGAAATTGACATCGGCCAGTCTGAATTTCAAGAAATTACCTGCTGAAGACAAGAGGGATCTCTTCT  
TCAGATTTGCAGTCTGGGGAAGACACAGCCTCTACTGTACTTTAGAACCTGAGATATGGTGGTGGAGGGA  
GCCCTGGGTGCGAGTGGTAAGATTACCCCTTAGGTTAGTATTGACGTAAGGTGACGAGGAGCTGTAGACAA  
AAGATTGTAACCATAAGAACTTCATAGTTTTTGTATTTTCACCGAGCTTATATTTGGTGTGTTTTTTGTCT  
TTTTCTTTATGATTATCAATAAAATGCTTGAAAGGAGATGAGGTTGGGGAATAATTTTGGGAATACCAC  
AAAAGACACTTTTGTGATGGAATCCTTAAAAAGACACAATCCATTACCTCATTGGGTTCAAAAGGCAAT  
TGTGAACTACTGTGGAGTTTGGAAAGAACCAATGAGGTAATCAAGGATACTGTTGACAATCTAGCTTATC  
CTATGGATGGAAGGAAATGAACTAATGGAGGCGAGGCTGGTAAACAATAGGGTTTGAGACAATTCTG  
TGCCATTAGAAATGAAAGAGGAAGGTGAATCCGGGAGACGGAGCTTGCACTGAGCTGAGATCGCGCCACT  
GCACCTCAGCCTGGGCGACAGAGCGAGACTCCATCTCAAAAAAAAAAAAAAAAAAGAAAGAAAGAAAGAAAG  
AGGAAGTAATAATCTGTGAAATTTTCCCTTAGGAACCTTATTGGCAATTTAAAAATGAATTTGTTAAGCCA  
TGCTGGTTCTGACCCAAAAAGCCATTCCCCAGCCTTCTCTACTCCCCTCTTTCACTACTGGCAGAGATTGT  
CTCTCATTTTACAAGCTGAAAAATGCCAGATGCTTGCTTTTACAGTCTTCCCTTACACCCAGAGCATGTGCA  
TATGTTTAAACGGTCAAGAAGAAGTCATAACATGGGTGTCTGGGAGAGCTTTTATCCACAAAAACAACA  
CTTCACTCAAAAAACAAACCAAAAGAAAAATTTCTCTTCCCTGCCATTGGATGTGAGGCTCAGACCTC  
TAGTAACCATTTTGTGACCACAAAGCAACAAGCCTGAGGAAAAGTCCACACGCTGAGCAACAGGCAGAA  
ATATTGCCATCGCTGAGTTGCAGAAACAAATCTAGAGATGTTTTGCTTCTGTAATTATTTTTTATGGGAG  
ATTACAAGTGGGTTTACTGTTCACTTTTCAAATCTTATTTCTCTATGATGTTTAGCTTGGGTAAATTTTA  
CCTTAAATCCACTTTTTTATGTAAGGTAACATATTTGTCTGTTTCAAGGATTAAGATGTGGGCATACTTG  
GAGGCCATTATTTTGGCCACCACAGGTGAAAAAGGAAGTGTTATTCTTAAATCATTGGAAGGATCTCTG  
TGTAATGCAAGAGCGAGACAAGAAAAATGCTGTCTTTTGTATATGGACTCGAATTTCCACTTCATGG  
TTGTCTGCTTCTTTTTTAGAGTATTATTTATCCTCCTAATAAAAAAGAAAGTGAAATTTCCCT

## RNA

>NR\_023925.1 Homo sapiens long intergenic non-protein coding RNA 470 (LINC00470), transcript variant 1, long non-coding RNA  
AAUGCCUUAAGAAAGGACUGAUCUCCCUUGAAGAGAGAAUUCUGCCUCUAGAUUGCUUACAAUUGAACUGGA  
ACAUCAGCUGUUCUCUAGGUCUUAAGUCUGCUGCUCUAACCUACAAAUUUUGGACAUGCCAAUUCUCCACAGUCACAU  
GGGCCAAUUCUUAUUAUUCUGGAGAAUCCUGACUAAUGUAUGCAAUGUCUUUAUUAUCCUUAUUCUUAAGGA  
UAUUUUAUCAGCAACACCACACCCUCCUGAUCACCAUAGCUUUAUGAUCUGAGCUUUAUCUGGUAUUAUUCU  
UCCGUCUGAAGAACUUGCUUUCUUGCAACAACAAGAAACAAAUUUUAUAGCUAACCUAACCAUUAUGACGCAAGA  
GACAAUUCUAAAGGACUUAUAAAACAGCAAAGUAGGAGCAGCUGCUACCUCUAGGGAUGAGGGAGAAACUAAAAAUG  
CAUACAAAAACCAUUGCAUGAAAAUGACUGGAUUUUGUACAUAGCGUCAGGAGAUGUGCGUAGUGUCAAGUAUCUC  
AUCACACAUUACUUGAUAAUUAUAAAUGAGAAAAAUGAACCUUACAGUGGCAAGACUUGACUUCUACCUCUUUCAA  
AAAGAUGCAAUUGUCCAAUUAUUGGUGAAAUUGUCAUUUCAUGCUAUUGGCUAUUUGAAAUUCCUCCUCUAAUUA  
GAAUAAAUCACUGAAAUUGACAUCGGCCAGUCUGAAUUUCAAGAAAUUACCUGCUGAAGACAAGAGGGAUCUCUUCU  
UCAGAUUUGCAGUCUGGGGAAGACACAGCCUCUACUGUACUUUAGAACCUGAGAUUUGGUGGUGGAGGGAGCCUGG  
GUCGAGUGGUAAGAUUCACCCUUAAGGUUAGUAUUGACGUAAAGGUGACGAGGAGCUGUAGACAAAAGAUUGUAACCAU  
AAGAACUUCAUAGUUUUUGUAUUUUCACCGAGCUUAUAUUGGUGUGUUUUUUGUCUUUUUUAUGAUUAUCAAUA  
AAAUGCUUGAAAGGAGAUGAGGUUGGGGAAUAAUUUUUGGGAUUAACACAAAAGACAUUUUGUGAUGGAAAUCCU  
AAAAAGACACAAUCCAUUACCUCAUUGGGUUCAAAAGGCAUUGUGAACUACUGUGGAGUUUGGAAAGAAGCAAUGA  
GGUAAUCAAGGAUACUGUUGACAAUCUAGCUUAUCCUAUGGAUGGAAGGAAAUUGAAACUAAUGGAGGCGAGGCUGG  
UAAAACAAUAGGUGUUUGAGACAAUUCUGUGGCAUUGAGAAUGAAAGAGGAAGGUGAAUCCGGGAGACGGAGCUUGCA  
GUGAGCUGAGAUCCGCCACUGCACUCCAGCUGGAGCAGAGCGAGACUCCAUUCUAAAAAAAAAAAAAAAAAGAAA  
GAAAGAAAAAGAAAGAGGAAGUAAUAAUCUGUGAAAUUUUUCCUUAGGAACUUAUUGGCAUUAUAAAAAUGAAUUUGU  
UAAGCCAUGCUGGUUCUGACCCAAAAGCCAUCCCCAGCCUCCUCACUCCCCUCUUUACUACUGGCAGAGAUUGU  
CUCUCAUUUUAACAGCUGAAAAUGCCAGAUUCUUGCUUUUACAGUCUUCUUAACCCAGAGCAUGUGCAUAUGUUU  
AAACGGUCAAGAAAGAGUCAUAACAUGGGUGUCUGGGAGAGCUUUUAUCCACAAAAACAACACUUCACUAAAAAA  
CAAACCAAAACAAAGAAAAAUUCUCCUUCUGCCAUUGGAUGUGAGGCUCAGACCUCUAGUAACCAUUUUGUGACCAC

AAAGCAACAAGCCUGAGGAAAAGUCCUACACGCUGAGCAACAGGCAGAAUAUUGCCAUCGCUGAGUUGCAGAAACA  
AAUCUAGAGAUGUUUUGCUUCUGUAAUUAUUUUUAUGGGAGAUUACAAGUGGGUUUACUGUUCACUUUCAAUCU  
UAUUUCUCUAUGAUGUUUAGCUUGGGUAAAUUUUACCUUAAAUCCACUUUUUAUGUAAGGUAACAUAUUUGUCGGU  
UUCAAGGAUUAAGAUGUGGGCAUACUUGGAGGCCAUUAUUUUGCCCACCACAGGUGAAAAAGGAAGUGUUAUUCUUA  
AAUCAUUUGGAAGGAUCUCUGUGUAAAUGCAAGAGCGAGACAAGAAAAUGCUGUCAUUCUUUUGAUUAUGGACUCGAA  
UUUCCACUUCAUGGUUGUCUGCUUCCUUUUUAGAGUAUUUUUAUCCUCCUAAUAAAAAGAAAGUGAAAUUUCCC

# DNA

>NR\_026849.1 Homo sapiens long intergenic non-protein coding RNA 526 (LINC00526), long non-coding RNA  
GCGGACTCCGCGGACAAGGCCAGGCCCTAGCCTTGAGCTCCGTCGGGCAGGGCCGCGGGATTGGTGTCCG  
GCAGAGCGTGAGCCAGCGGGCTGGAGTCGGCGAGCGGGAGTGAAAGAAGAAAAGCTAGAGAGCGAAGGC  
AAAGCCCGAGGAGAGAGGGCCGCGGTCCGCTAGTGGCTAAAGGCAAAGCATTCGCGGGCGCGGCGCATGAAGT  
AGGGCTCCCTCAGGCGGGCGGCTCCGCTAGTGGCTAAAGGCAAAGCATTCGCGGGCGCGGCGCATGAAGT  
TGAGCTTCGTCCCTGCTAGCCGCGCTTTCTCCCCAAAAATACATCCTAGCCTTAATGTTTATGCCTCCA  
TTGCCCCAGTTCTTATCTGTTTTGCTCAATGTCTCATAGCTACAAGAAGGCAATTTCTGACGAAGCCCTC  
CGTCCCTTCCAAATGGATTATTTTGGCGGGCTTCCACCCGGACAGTATGCCACCCGAATGACTGGACAAG  
TGCACGGGAGCGGCTGTCAATTTGCGGAGTGCGCCTTGCGATCTAGGCGCCTCACAGCGCAAATTATCCAG  
TAATTTCTCTGAAATCGATGCTGGTTTGTCTTCCCAAGGCAAATCAGCAGCTTATACAGACATTGGGGCC  
ACAAAGCCGGTGGAACAACGGGAGACGGCTTCTGAGTGTGAGTCTTCCAAGATGAGCTTAACTTCGG  
GTGGTGGGCGAGGCTCGGTAGGCGGAAAGGCCCGTGTCCAGATGAATGCAGTCCATGTTTATATTGATGA  
AAGACACGTATACCATTTGGTCCAGCTCAACCATTTCTAACAAGTGTCTGGCTGTGAGCACTGGTGTGTGT  
GTGCCTGCGTGCAACCAGCAATGTAAGTGATGACCAGCTGCATGATGCCTTAATTTGAGTGGACAAAGTC  
GGTCAAGAACCACCTTTTCAAGCTTCTGGGTCTCCAAGTCTTTGTCTCCCTGTATCCAAACGAGGCATTCCA  
AGTTTGACAGCATGGAACATTGCATGTCCGAAATACCAACCGTGAAACTGGGTAAAAAGCTTCAGGAGGT  
GATATTGATGTGTATAGTTTAGGAAATAAAACCAATACTTACTTCAAAGAACGTAATTTGTGGCTTTTT  
AGAGAGAAGGATACTTTGACAGTTTTTCAATTTGTCGTCTACATGTATATGGTACGTTTCATTCTGCCTTTT  
AATTAATTTGGTATTTTACTATGAAACTACTTTGTATTAAATAAAATAATGTATTTCCAATGTTATAAGT  
TGTGTTATAACAGTTTCAAAAGCCAAATAAACAAGATGCATTTTGAAAAAAAAAAAAAAAAAAAA

# RNA

>NR\_026849.1 Homo sapiens long intergenic non-protein coding RNA 526 (LINC00526), long non-coding RNA  
GCGGACUCCGCGGACAAGGCCAGGCCUAGCCUUGAGCUCCGUCGGGCAGGGCCGCGGGAUUGGUGUCCGGCAGAGC  
GUGAGCCCAGCGGGCUGGAGUCGGCGAGCGGGAGUGAAAGAAGAAAAGCUAGAGAGCGAAGGCAAAGCCCGAGGAGA  
GAGGGCCGCGGUCGGCGGAGGAAUCUGACUGCACGGUUGCGUGCGUCACUCCCGAGGGCUCCUCAGGCGGGCGG  
CUCCGCUAGUGGCUAAAGGCAAAGCAUUCGGGGCGCGGCGCAUGAAGUUGAGCUUCGUCCUGCUAGCCGCCGCUU  
UCUCCCCAAAAUACAUCUAGCCUUAUUGUUUAUGCCUCCAUGCCCCAGUUCUUAUCUGUUUUGCUCAAUGUCUC  
AUAGCUACAAGAAGGCAAUUCUGACGAAGCCUCCGUCUUCCAAUGGAUUAUUUUGGCGGGCUUCCACCCGGA  
CAGUAUGCCACCCGAAUGACUGGACAAGUGCACGGGAGCGGCGUGUCAUUUGCGGAGUGCGCCUUGCGAUCUAGGCGC  
CUCACAGCGCAAAUUAUCCAGUAAUUCUCUGAAAUCGAUGCUGGUUUUGUUUCCCAAGGCAAAUCAGCAGCUUAUA  
CAGACAUUGGGGGCCACAAAGCCGGUGGAACAACGGGAGACGGCUUCCUGAGUGUCAGGUCCUCCAAGAUGAGCUUAA  
ACUUCGGGUGGUGGGCAGGCUCGGUAGGCGGGAAAGGCCCGUGUCCAGAUGAUAGCAGUCCAUGUUUAUAUUGAUGA  
AAGACACGUUAUACCAUUGGUCCAGCUCAACCAUUCUUAACAAGUGCUGGCUUGAGACACUGGUGUGUGUGCCUG  
CGUGCAACCAGCAAUGUAAGUGAUGACCAGCUGCAUGAUGCCUUAUUGAGUGGACAAAGUCGGUCAAGAACCACU  
UUCAGGCUCUCGGGUCUCCAAGUCUUGUCUCCUGUAUCCAAACGAGGCAUCCAAGUUUGACAGCAUGGAACAUU  
GCAUGUCCGAAAUACCAACCGUGAAACUGGGUAAAAAGCUUCAGGAGGUGAUUAUGAUGUGUAUAGUUUAGGAAUA  
AAACCCAAUACUUAUCAAAGAACGUAAUUUGUGGCUUUUUAAGAGAGAAGGAUACUUUGACAGUUUUAUUGUGCG  
UCUACAUGUAUAUGGUACGUUUAUUCUGCCUUUUAAUUAAUUUGUAUUUUACUAUGAAAACUACUUUGUAUUAAU  
AAAAUAAUGUAUUUCCAAUGUUAUAAGUUUGUGUUUAUACAGUUUCAAAGCCAAAUAAACAAGAUGCAUUUUGAAAA  
AAAAAAAAAAAAAA

# DNA

>NR\_015389.1 Homo sapiens long intergenic non-protein coding RNA 667 (LINC00667), long non-coding RNA

GAGCGGGGAGCAAGGCCTGCGGGGAGGCGCAGGATGGACGCGTTGGCTGTCATGATGTAGGACCTCCTGA  
CCTAGAACCATGCCCGGCGCAGGGAGAACCAACGAGCTTACGGACCGGGTGCAGGGGCTGCTGTGCGAGAA  
AGCCTACCTGCTGGCCCGGAGCGTTTCGCCGGCCACCTGGTGGCTTTCCCTGGACGTTTAAACGGCGACT  
CCGCCCGGCTCCCGACTTTTGTATGCAGGCGTTCTCTTACATGACTTTCTTCGAGGCTAGATTCTCGAA  
AGACATCCTGAAGGTGGCTTTCTTAATTAGCTCCCTCACCGGCTGGCGGAGCAGTTTCGTAGTCGCCTACA  
TCGAGAGGGGAGAGCCCCGTCCTGGCTCAGTACTGGGGCTTCGTGGACGCGCTGTAGCGGGTCTTCGCCGT  
CGTGGGTAGGAAACAGTCGGGCCGGATCCCCGGTGTCTGGGGAGCGGCTGCCGGCCGGGCCCGCGCAGC  
CGCTTCACTCCTACAAGCCCGGCTCACTAGTTCCAAGCTGCTGGACTTTGACCCCTCGCTGGGAAGCTTGA  
TCGCCGCTGTTCTCGCAATCTCTATGCCTTTGCACTGCCAGCAACCCGGTCACTGCCAGGACCTGT  
TAAAAGTTGAATGGACCTCCAGAATCACGCCGTGCCACCGCCGTTTCTAGAGACGGCTTTTGGCCACC  
TTTGAGAATCAGGGTCAAACCTTGAAGGGCCTGCATTTGTACACTTCCCTCGGACACTAATTTGGATAGT  
TCAGGCCCAGAGACGGCTTCCCGGTTAGTGTGCCTGACAACACTGAAGAAAAATTGTGACATTTTCCTT  
CCCCAGAATTACTTCGTTTATACATTTCACTTCTCTTCTGAAATCACAGCAATGCCAGTTTGCGCCCTT  
TGGTCTGAGGAACGCAGGCCCTGGCCACTACCAGGAAAAAATCCTTTGCACATGGCCTGCTATCAACAAT  
CCTCTACAATGATTCTCAGCATCACCTAGGGAGCTTATGTAAAATCTCAAATTCCTGGGCCCTATCCCCA  
GAGTTTCTTATCAATTTCTTGATGGAGAACTATCAAAGCAGTCAAAGCTATCAAAATAAAAAAGAATTC  
TGATTGGGTGCAGTGGCTCACACCTGTCATTCCAGCACTTTGAGAGGCCAAGGTGGGCAGATCACATGAG  
GCCAGGAGTTCAAGACCAGCCTGGCCAAACATGGCAGAAACCCCATCTCTACTAAAAATACCAAAATTAGC  
CGGGCATGGTGAACACACCTGCAATCCAGCTACTCGGGAGGCTGAGGCAAGAGAATCGCTTGAACCTG  
GGAGGCAGAAATTGCAGTGAACAAGTTGGTGCCAAATGCATTCAGCCTGGATGATGGAGCGAGACTCTG  
TCTCAAGAAAAAACAACAAAAACAGAACTCTGCCTCATAGCGTCTTTTAAAGTTATACACTGGA  
CCTATCCTTTCTCACTGACAGACATTTTAAAAATTTTTTGGTAAGGCCCTAGTTTATATAAAATGTAATC  
CAAGCCAAAAAGTTAAACAAGAATAAGGGGAGGAAAGGGGACTCCAATAGCAGAGAAAGGTATTTACCTGGG  
ATATACACTGCAAGAAAAATCAAAGCTATAAGAAACGTCCTATGAATAGTAGCCATAAGGCATCAGAGTGAT  
AAAAATCCTGTCCCTAGGAGGGAATATTGGAGTTTGCCAGAGAAACAGAATGAGAGAGACAGAGAGGTTT  
ATTGTAGGAATTGGCTCATATGATTACGGAGGCTGAGAAGACCCACGATCTGCCATCTGCAAGCTGGAGA  
ATCAGGAAAGCTGGAGGTGTAATTCAGTCAAGTCCAATGGCCAGAGAAGCAAGTGACTGATATCCAAGA  
GCAGGAGAAAAATAGATGTCCAGAACAAAGCAGAGAGGCTGATTTTGTCTTCTCTGCCTTTTTTGTTC  
TATGGGGCACTGAATGGACTGATGCCCATCCACATTAGTGAGGGTGGATCTTCTTTACTCAGTCTACCAG  
TAGAAATGTCAATGACTTCCAGAAACACCCCTACCAACACACGTGGAAATAATGTTTTACCAGGTATCTG  
GGCATCCCTTGGTTCACTCAAGTTGACACAAAATTAACCATCACAGAAGGAGACTGGCCTTACTCTGAAA  
TTAGGAAACTAAAGAAAGTGACCAGAAATGGAGACTAGGTAGAGACAACCTAGTTCTCTACCAAACATGTACA  
GTTATTTCGTTGGTATCTGAAGGGGATTTGGTTCCAGGAACTCTCAGGGATACCAAATCTGCAGGTGCTCA  
AGTCATTTATATAAAATATTACAGTATTTGCATATAACCTTTGCACATCTTCCATATACTTTAAATCATC  
TCTACATTACTTATAAATGAATGTGTAAATGCTATGAAAATAGTTACTACACTATTGTTTATTTGTAT  
TTTTATTGAATTGTTTTGGGGTGGGGGCGAGCTGTATCTTTCTTAGTAATAGAACCCCTGGTTTTAGCTG  
GGCAGTACTGCCCTCAATAAAGATTAAAGTACCCAGCCTTCCCTTGAGATTGTGGCCATGTGACTGAA  
CTTTAGACAGTGAGATATAAGCAGATATCTTCTGTGGCAGTGTTAGGAAACTATTAAAGACAGTAAGAAC  
ATTGCCCTTTGCCTTCTTTTTCTTTCTTCAATTTTTCTGCCTGGAATGCAAATGTGATGGCTAACCCCT  
AGCAGCCATTTTAGATTATGAAGATGAGAGTCACTCCCAGGAAGGTGGACCTGAAAGCTGGATTCTAG  
ATGTGGAATGACAATACCAGCCCTGGACTACCTACCTGTAGGCTGTGTGTGTGTGTGTGATTGACAGA  
GAGAGAGAGAGATAGATACCACAAGTAACACAAAGCATCATACCTGGGACTGGGAAGGTTAATGTTTAAA  
CATTTTAAATGTGGCATTGGTTTGTGAAGACAGTCAAGCAGTAGGTGCTGCAGGCTTTGTTGAGGCTAG  
AAAGCTGTTGGTCTTTATTAGGTGATGGCAAAACAATGGATCACATTTTTCATGTGCTGTGTCTTGGGAGG  
CAAATGATGAGAATGTAGGATTGGGGAAAAATGGTAAGGAAAAATCCAAATGTTTCATGTTTTCTAACCCCT  
TCTTGCCAATCTTAAAAGAAGGACAAACAGGCTAGATTAAGCAAGTCTACAGTTACAATTGGAAGGAAAC  
ACAGCCGTACTAAGGAAGTACTCTGTCTGTGGCCTGCAGTCTAGTTTGACTAGGTCCCTGTATTTGAGCTT  
TGAAAGAGTAAAGAATACAAGTGCTCGTATACCCCTGAAGTAGTTACCAGCAGTGACTGCAAGGAGGTAA  
TCTTATGGGATGAAACTATAACTCTGTATTAACCATCATATATAGCATATATGTGTATATGTATGTGTGT  
GTGTGTATATGTGTATATAAATATATGTGTGTGTATATACACACATGTACACACCCCTACAACCCAGTGAT  
TTCAAAAAATTAAACATTTGTTTAGCTCATGAATCTGTGGGTGGGTGAACATTTCTATTGGTCTTGGCT  
GGGCTCACCTGTACCCAGTCAGCTGCAGGGTCTAGCTCTTCTTATCTTGGCTGGGATCTCACACATGTCT  
AGGATCAGCTGCTTTACTAGTCTAGGATTGTCTTGGCTGAGACAGGTGGACTACTCAGTTCTCCTCCACT  
GCCTTATCCTTCAGCTGGCCAGCCAGAAATGTTGCCATGTTTACAGCATAAGAGCAAGCAAGAAAGAAT  
AATATGCAACCACTTTTCCAAGCCTAAGGTGAAAGGGCGGCAGAACCTGTGGTGTGTAGGAGGCAACTCA  
TACCAGCCCATGGGTCTACCGTTAATTTTCAGAAAATTTGGCAAGCTGATTGTTAACACAGCTGTTGTTT  
AATTTATGTACTTGTAAATTAAATAATTTACATTTAAACAAAGATAATAGGTACTCAAAA

# RNA

>NR\_015389.1 Homo sapiens long intergenic non-protein coding RNA 667 (LINC00667), long non-coding RNA

GAGCGGGGAGCAAGGCCUGCGGGGAGGCGCAGGAUGGACGCGUUGGCUGUCAUGAUGUAGGACCUCUGACCUAGAA  
CCAUGCCCCGGCGCAGGGGAGAAACAACGAGCUUACGGACCGGGUGCGGGGGCUGCUGUGCGAGAAAGCCUACCUGCUGG  
CCCGGGAGCGUUCGCCGGCCACCUGGUGGCUUUCCUGGACGUUUAACGGCGACUCCGCCCGGCCUCCCGACUUUU  
UGAUGCAGGCGUUCUCUUAUACUAGACUUUCUUCGAGGCUAGAUUCUCGAAAGACAUCUGAAGGUGGCUUUCUAAAU  
AGCUGCCUACACGGCUGGCGGAGCAGUUCGUAGUCGCCUACAUCGAGAGGGAGAGCCCCGUCCUGGCUCAGUACUGG  
GGCUUCGUGGACGCGCUGUAGCGGGUCUUCGCCGUCUGUGGGUAGGAAACAGUCGGGCCGGAUCCCCGGUGUCUGGGG  
AGCGGCUGCCGGCCGGGCCCGCGCGAGCCGCUUCACUCCUACAAGCCCGGCUCACUAGUUCGAAGCUGCUGGACUUU  
GACCCUCGCGUGGGAAGCUUGAUCGCCCGCUUUCUGCCAAUCUCUUAUGCCUUUGCACUGCCCAGCAACCCGGUCAC  
UGCCCAGGACCUGUUA AAAAGUUGAAUGGACCUC CAGAAUCACGCCGCGUGCCACCGCCGUUUCUAGAGACGGCUUUU  
GGCCACC UUUGAGAAUCAGGGUC AAA CUUGGAAGGGCCUGCAUUGUCACACUUCUCGACACUAAUUGGAUAGU  
UCAGGCCCAGAGACGGCUUCCCGGGUUGAGUGGCCUGACAACACUGAAGAAAAAUUGUGACAUUUUCCUCCCCAGA  
AUUACUUCGUUUUAUACAUUUCACUUCUCUUCUGAAAUCACAGCAAUGCCAGUUGCGCCUUUUGGUCUGAGGAACG  
CAGGCCCUGGCCACUACCAGGAAAAAAUCCUUUGCACAUUGGCCUGCUAUCAACAAUCCUCUACAUAUGAUUCUCAGCA  
UCACCUAGGGAGCUUAUGUAAAAUCUAAAUUCUGGGCCCUAUCCCCAGAGUUUCUUAUCAAUUUCUUGAUGGAG  
AACUAUCAAGCAGUCAAGCUAUCAAAUAAAAAGAAUUCUGAUUGGGUGCAGUGGCUCACACCUGUCAUUC CAG  
CACUUUGAGAGGCCAAGUGGGCAGAUCAUAGAGGCCAGGAGUUCAAGACCAGCCUGGCCAACAUUGGCAGAAACCC  
CAUCUCUACUAAAAAUACCAAAUAGCCGGGCAUGGUGGAACACACCUGCAAUCCCAGCUACUCGGGAGGCUGAGG  
CAAGAGAAUCGCUUGAAACUGGGAGGCAGAAUGUAGUGGAGUUGGUGCCAAUGCAUUC CAGCCUGGAUGAU  
GGAGCGAGACUCUGUCUCAAGAAAAA AAAAA CAAAA CAGAACUCUGCCUCAUAGCGUCUUUAAGUUAUA  
CACUGGACCUAUCCUUUCUCACUGACAGACAUUUUAAAAUJUJUUGGUAAGGCCUAGUUCAUUAUAAAAUGUAUUC  
CAAGCCAAAAGUUAACAAGAAUAAGGGGAGGAAAGGGGACUCCAAUAGCAGAGAAAGGUAUUUACCUGGGGAUUAACA  
CUGCAAGAAAAUCAAAGCUAUAAAGAAACGUCCAUGAAUAGUAGCCAUAAAGGCAUCAGAGUGAUAAAAUUCUGUCCC  
UAGGAGGGAAUAUUGGAGUUUGCCAGAGAAACAGAAUGAGAGAGACAGAGAGUUUAUUGUAGGAAUUGGCUCAUUA  
GAUUACGGAGGCUGAGAGACCCACGAUCUGCCAUUCUGCAAGCUGGAGAAUCAGGAAAGCUGGAGGUGUAUUUCAGU  
CAAGUCCAAUGGCCAGAGAAAGCAAGUGUAUCUGAUUCCAAGAGCAGGAGAAAAUAGAUGUCCAGAACAAAGCAGAGA  
GGCUGAUUUUGUCCUUCUCUGCCUUUUUGUUUCAUAUGGGGCACUGAAUGGACUGAUGCCAUCCACAUUAGUGAG  
GGUGGAUCUUUUUACUCAGUCUACCAGUAGAAAUGUCAUAGACUUC CAGAAACACCCUCACCAACACACGUGGAAA  
UAAUGUUUUUACCAGGUUUCUGGGCAUCCCUUGGUUCACUCAAGUUGACACAAAAUUAACCAUCACAGAAGGAGACUG  
GCCUUAUCUCUGAAAUAGGAAACUAAAAGAGUGACCAGAAUGGAGACUAGGUAGAGACAACUAGUUCUCUACCAAAC  
AUGUACAGUUAUUCGUUGGUUUCUGAAGGGGAUUGGUUCCAGGAACUCUCAGGGAUACCAAAAUUCUGCAGGUGCUCA  
AGUCAUUUAUUAUAAAAUAUACAGUAUUUGCAUUAACCUUUGCACAUCUCCAUAUACUUUAAAUAUCUCUACAUA  
UACUUAUAAUAAUGAAUGUGUAAAUGCUAUGAAAUAAGUUACUACACUAUUGUUUAUUUGUAUUUUUAUUGAAUUGU  
UUUGGGGUGGGGGGCAGCUGUAUCUUUCUUAUGAAUAGAACCCUGGUUUUAGCUGGGCACAUGACUGCCCUCAAUA  
AAGAUUAAAAGUACCC CAGCCUUCUUGAGAUUGUGGCCAUGUGACUGAACUUUAGACAGUGAGAUUAAGCAGAUUU  
CUUCUGUGGCAGUGUAGGAAACUAUUAAGACAGUAAGAACA UUGCCCUUUGCCUUCUUUUUCCUUUCUUAUUUU  
UCUGCCUGGAAUGCAAAUGUGAUGGCUAACACCCUAGCAGCCAUUUUAGAUUAUGAAGAUGAGAGUCACUCCCCAGG  
AAGGGUGGACCUGAAAGCUGGAUUCUAGAUGUGGAAUGACAAUACCAGCCUGGACUACCUACCGUAGGCUGUGUG  
UGUGUGUGUGUGAUUGACAGAGAGAGAGAGAGAUAGAUACCACAAGUAACACAAAGCAUCAUACCUGGGACUGGGAA  
GGUUAUUGUUUAAA CAUUUAAAUGUGGCAUUGGUUUGUUAAGACAGUCAAGCAGUAGGUGCUGCAGGCUUUGUUG  
AGGCUAGAAAGCUGUUGGUCUUUAUUAAGGUGAUGGCAAAACAAUGGAUCACAUUUUCAUGUGCUGUGUCUUGGGAGG  
CAAAUGAUGAGAAUGUAGGAUUGGGGAAAAUGGUAAGGAAAAUCCAAAUGUUC AUGUUUUCUAACCCCUUCUUGCC  
AAUCUUAAAAGAAAGGACAAACAGGCUAGAUUAAGCAAGUCUACAGUUACAAUUGGAAGGAAACACAGCCGUACUAAG  
GAAGUACUCUGUCUGUGGCCUGCAGUCUAGUUUGACUAGGUCCUGUAUUUGAGCUUUGAAAGAGUAAAGAAUACAAG  
UGCUCGUUAUACCCUCUGAAGUAGUUACCAGCAGUGACUGCAAGGAGGUAAUCUUAUGGGAUGAAACUUAACUCUGUA  
UUAACCAUCAUAUAUAGCAUAUAUGUGUAUAUGUAUGUGUGUGUGUAUAUGUGUAUAUAAUUAUAGUGUGUGUA  
UAUACACACAUGUACACACCCUACAACCCAGUGAUUUCAAAAAAUUAACA UUGUUUAGCUC AUGAAUCUGUGGGU  
UGGGUGAACAUUUCUAUUGGUCUUGGCUGGGCUCACCUGUACCCAGUCAGCUGCAGGGUCUAGCUCUUCUUAUCUUG  
GCUGGGAUUCACACAUGUCUAGGAUCAGCUGCUUACUAGUCUAGGAUUGUCUUGGCUGAGACAGGUGGACUACUC  
AGUUCUCCUCCACUGCCUUAUCCUUCAGCUGGCCAGCCCAGAAAUGUUGCCAUGUUUACAGCAUAAGAGCAAGCAAG  
AAAGAAUAAUAGCAACCACUUUCCAGCCUAAGGUGAAAGGGCGGGCAGAACCCUGUGGUGUUAAGGAGGCAACUCA  
UACCAGCCC AUGGGUCUACCGUUUAAUUUUCAGAAAUUUGGCAAGCUGAUUGUUAACACAGCUGUUGUUUAAUUUAU  
GUACUUGUAAUUAUUAAUUAUUAUUAUAAAACAAAGUAUUAAGGUACUAAAA

# DNA

>NR\_034100.1 Homo sapiens long intergenic non-protein coding RNA 668 (LINC00668), long non-coding RNA  
GGGGCGGCCTGGGACTCGGGGCGGGGTCACTCATATAAGGCTGTGCCAGCGCTTTTGAAGCAGTAAG  
TCCAGCCCCGAGGCTAAGGAGGTGTTAACCACCGAAGGGAGGTAGAATGTTTTTCCCCACGAGGAGGCA  
GCGACCACGTCTCTCTATGGAGGCATTCAAGAGCCGTCCAGCTGAAGCAGCATCACTGTCTGAGCTCGG  
AAGGCACAATCCACATAGGTCTGCATGGTCCACCGAGCTGCATACCCACGGGGCCAGCGGGAGGTGGGCA  
GCTGCTGGGCTCTCTTCTGAAGCAGACAGGATCTCACTCTGTTGCTGAGGCTGGATCACAGCTCCCTGCA  
ACCTTGAACTCTCCCTCAAGCAATTCTCCCCACTCTGCCCTTCCAAAGCACTAGCATTTATAGGCCAAGCC  
ACCACTCCCATCCACTGTAGTGTAAGTGTCTCTCTTCAATGTTTCCAATAGTTGCGGAGCAGATCAGATA  
AGGGTTCTTCTGTCTGTTGCTTCAAGTTTTCATTCTCTCTTTAAACAATACAAGGTGGCTTCCATGGTT  
CCTTCTTAAAGAATGTTGAAGGTGTGTCTTCAGATTCAATTTAGTGTTCGTGGAACCCAGGGAAAGCTGA  
TGTAACAACTCTTTTTTCTCCATATGTCTCAAAAAGTTGTATTTTCTGGGTCCAAGGGATCTGCAAGC  
CTCCTAAAGGCATTTCCATTGTCACTACCACCAGGTGTGAACTGTAATCTGGCAGCTATAGTTCCAAGAA  
CTGTCTATAATAGATGCTGAAGAAACATTGTGAAGTTAACTCGCTGTTACCAACTGTGAAGTCATTAGCTA  
GAGGAATCTTGGGCGGTCTGAAATCTGAGATACTGTGGAAAGAACAGAAAGATCCTGTATCTTTCTTATA  
ATTGTTCTACTGGAAGTTGTCAATTTACACAGGAGACATTCTGTTTTATTTATTTTCTTTTGAGACAGGG  
TCTCACTCTGTGCGCCAGGCTGGAGTGCAGTGTGTTTACCACAGGTCACTGGTGCCCTCCACTGCCTGAGG  
ACTGCTCAAGCAATCCTCCTGCCTCAGTCCCCTGAGGAGCTGGGGCCACAGGCCTGCACCACCATGCCTG  
GCTAATTATTTTTATTTGTAGAGACAAAGTCTATCTTGCCTAGGCTGATCTCGAACTCCTGGGCTCAAGT  
AATCCTCCCGCGGTGGCTTCTCAAAGTGCTTGGGATTACAGATGGTCTTGCTCTGTCACCAGTCTGGAA  
TGCAGTGGTGCCATCATAGCTCACTACAGCCTGAGCTGTACTGAGCTCGAGGGATCTTCCCGTCTCCGCC  
TCCTAAGCAGCTGGGACTACAGGTAATGGAAGTGGGCAGAGAATGATCCTTTCCCTAGGCTCCAGTGTGT  
AAGAATTAAAGAAAGAGGAAAGAAACACAATGGCTTGATGGTCGAGGACAGGTTTATTTTAAAGAAAACA  
AACCCAAAGATGGCTTCTGGCTGAGTTAGATCAGGAAGAGAAAGTGAATTTTCTTGAATGCATGAGGCTG  
GAAAGGGAGCTGGCACTTAAAGTGGCGGTGTTTGTCCGAGAGGATGGTGCTCCTGCTCTGTACAGTGGG  
CATGGGGATTTCAGGCCACTGCCACCGAATTTCAAGAGCCCAAGCACAGAGCCAGAACTAAATTTGTGAGG  
GTTTAAAAAAGCTTTATTGAAGTATAAATTGACATACAATAAACTTGAATATTTAAAGTGTACA  
A

# RNA

>NR\_034100.1 Homo sapiens long intergenic non-protein coding RNA 668 (LINC00668), long non-coding RNA  
GGGGCGGCCUGGGACUCGGGGGCGGGGUCAGUCAUAUAAGGCUGUGCCCAGCGCUUUUGGAAGCAGUAAGUCCAGCC  
CGAGGCUAAGGAGGUGUUAACCACCGAAGGGAGGUAGAAUGUUUUUCCCCACCAGAGGAGGCAGCGACCACGUCUCC  
UCUAUGGAGGCAUUAAGAGCCGUCCAGCUGAAGCAGCAUCACUGUCUGAGCUCGGAAGGCACAAUCCACAUAGGUC  
UGCAUGGUCCACCGAGCUGCAUACCCACGGGGCCAGCGGGAGGUGGGCAGCUCUGGGCUCUCUUCUGAAGCAGACA  
GGAUCUCACUCUGUUGCUGAGGCUGGAUCACAGCUCUCCUGCAACCUUGAACUCUCCCUCAAGCAAUUCUCCCCACUC  
UGCCUUCCAAAGCACUAGCAUUAUAGGCCUAGGCCACCACUCCCAUCCACUGUAGUGUAACUGUCUCCUCAAUGU  
UCCCAAUAGUUGCGGAGCAGAUCAUAAGGGUUCUUCUGUCUGUUGCUUCAAGUUCAUUCUCUCUUAAACAAU  
ACAAGTUUGGCUUCCAUUGUUCUUAAGAAUGUUGAAGGUGUGUCUUCAGAUUCAUUAGUGUUCGUGGAACC  
CCAGGGAAAGCUGAUGUAAAAACCUUUUUUCUCCCAUAUGUCUCAAAAAGUUGAUUUUCUGGGUCCAAGGGAUC  
UGCAAGCCUCCUAAAAGGCAUUAUCCAUUGUCACUACCACCAGGUGUGAACUGUAUUCUGGCACGUUAGUCCAAGAA  
CUGUCAUAAUAGAUGCUGAAGAAAACAUUGUGAAGUUAACUCGCUGUUAACCAACUGUGAAGUCAUAGCUAGAGGAU  
CUUGGGCGGUCUGAAAUCUGAGAUACUGUGGAAAGAACAGAAAGAUCCUGUAUCUUUCCUAUAAUUGUUCUACUGGA  
AGUUGUCAUUUACACAGGAGACAUUCUGUUUUUAUUUAUUUUUUGAGACAGGGUCUCACUCUGUCGCCCAGGCU  
GGAGUGCAGUGUUGUUAACACAGGUCACUGGUGCCUCCACUGCCUGAGGACUGCUCAAGCAAUCCUCCUGCCUCAGU  
CCCCUGAGGAGCUGGGGCCACAGGCCUGCACCACCAUGCCUGGCUAUUUAUUUUUAUUUGUAGAGACAAAGUCUAUC  
UUGCCUAGGCUGAUCUCGAACUCCUGGGCUCAAGUAAUCCUCCCGCGGUGGCUCUCAAAGUGCUUGGGAUUACAGA  
UGGUCUUGCUCUGUCACCCAGUCUGGAAUGCAGUGGUGCCAUCUAGCUCACUACAGCCUGAGCUGUACUGAGCUCG  
AGGGAUCUUCUCCGUCUCCGCCUCCUAGCAGCUGGGACUACAGGUAAUGGAAGUGGGCAGAGAAUGAUCCUUUCCCU  
AGGCUCCAGUGUGUAAGAAUUAAGAAAGAGGAAAGAAACACAAUGGCUUGAUGGUCGAGGACAGGUUUUUUUAAA  
GAAAAACAAACCAAGAGUGGCUCUUGGCUGAGUUAGAUCAAGAGAAGAGAAGUGAUUUUCUGAAAUGCAUGAGGCUG  
GAAAGGGAGCUGGCACUAAAAGUGGCGGUGUUUGUCCGAGAGGAUGGUGCUCCUGCUCUGUCACAGUGGGCAUGGGG  
AUUCAGGCCACUGCCACCGAAUUAAGAGCCCAAGCACAGAGCCAGAACUAAUUGUGAGGGUUUAAAAAAAAA  
AAAGCUUUAUUGAAGUAUAAUUGACAUACAUAUAAACUUGAAUUAUUAAAGUGUACAA

DNA

>Homo sapiens long intergenic non-protein coding RNA 907(LINC00907), transcript variant 1, long non-coding RNA.

GCACTTCTCTCTTCTGCCTCCTAGTGAAAAAGGTGCCTGCTTCTCCTTCTGCCATGATTATAAGTTTCTGAGGCTT  
CCCCAGCCATGCGTAACTGAGTGAGGACCTAGAAATTTTAATGTCTAATATGCGGTGTGAATTAAAGAAGCGGCCTTG  
CTATGCTGACCTTTTCAATATTCTAATCTTTGCTTTGCTGACCTCTCAGGCCCTCTTCTGGCAACAGTTAGGCTTTT  
GAGAGGAGAGAGAGCTGAGACTGTTGGCTCCTTCCCATTTATGAGAGAGCCACATGACATCAGCCCATAGACTGTGG  
AGAGTATTCCAGATCTATCACATTCTGCGATTCTGCGATTCCCAGAAGGCTGGTCATGAAAAAATTCCTCTTCAGT  
TTACATATATGGCAGTGCTCCAGTGCCATGACAGTTTTAATCTTCTGGTTCCATCTGCATAGATTTTCAGTCTCTAAT  
TGAGGAAAAATCATCTGTTTTTCTCAGGAGCCCCCTTGATTCAAGTTTACACAAAATGTGCCTTTGGGAGACTATCCTGT  
TAATTTAAACAGTTTCAGATCCCACTTGATGTGAGACAGATGCTTCTCTGGCCATCAGCCAGGTACCACTAAAGGAG  
GTACAGGCACTTCTAGATATCTGTTGAGGCCTGGAAGGGGCAAAACAATTTCAGGAAGCAGTTGAAGATAAAGGGGTT  
TACCATGGAAGAGAAGATCCAGGTGCCTTCATGGAAATGCTTGTGGTTGAAAAGAGATGAAGATGAGGGTCCCTGGA  
AAGAGGAAGAACCAGCCAGGAAAAATTATACCATTAGCAAGACTGGCATCAGCAAGTAGTTCGCAGTGTGGTTGTTTC  
TTGGTTTCGCAGGATTTTATAGGAGATGGACCTTCTCCTAAAAGTCTTATCTTCTAAGTCTCCTAAGTCTTGGACTT  
TTCAAGGCCAAAGATTTAAAGGCCAAGTGGACCATACGGGAGATCTAGTTTCCCATCCAGACAGCCAAGCTCATGCA  
TCCCTGGATTTGGATGGATGGTTTTCCCATGGGGCCTTGGACAGATTGGACCCAGCACTGGCACAGGGTTGACTTGGGA  
GGAATAAGCTCCTGGAAACCTCAATTAGCGTTTGGGGTATGAACATTAACAATACTGAATCTGGAACAATAACATC  
ACACAGCGGGTCCAAGGAAAAAAGCAGAAAGGCTGGCAGCAGGCCAGGGCCAGGGGCCAAATCGCTCCTCAAAGACAA  
TTCTTCATGGAGAAATGACAGCAGGTTTGGAGACAGCAGAATTTTCGCTCTTGTGTGCCAGGGCTGGAGTGCAATGGT  
GCAATCTCGGCTCACCAACAACCACTGCCCTCTGGGTTCAAGCGATTCTCCTGCCTCAGCCTCCTGAGTAGCTGGGAT  
TACAGGAAGTACAAAAACATCCTTGCCGTTTGTCTGGAATGATGTACTGCTGAAGGCAATGGACACTGGGGTTGTTTG  
TCCCTAATCACAAGAACCTCAGTAAACATCAGGCACCTCAGTGCTCTCCAGACTGCAGTGGTGGTGGAGCTGAGAGGA  
CTGTGTTTTGGAGGAGTAAATGTCCACTCTCATGCTATTTTTATTTCTCAGGCCCTTTGTATGGCCTTCTTAGTGGTA  
AGATCTGGAAGGGTACAATATGGTGATAGATGTAACTTTTGCTTTTGAGAGGTAAGGTGAAGTGAGGCCTGAGTAAA  
GATTCAACCAGTTTAGGAAGACATTGCAGTTTGTCTTCTATTTGTTCAATTTCAGTTTACTAGGTTAGAGAAGAAGATAG  
AGACTTCAAGCAAGGCCTGGCACATAAATCTTCCCTTGGCTAAATAGTCAATCATTAATAATCTCTCTTGAGGATGTA  
AAAAAAAAAAAAAAAAAAAA

RNA

>Homo sapiens long intergenic non-protein coding RNA 907(LINC00907), transcript variant 1, long non-coding RNA.

GCACUUCUCUCUUCUGCCUCCUAGUGAAAAAGGUGCCUGCUUCUCCUUCUGCCAUGAUUAUAAGUUUCCUGAGGCUU  
CCCCAGCCAUGCGUAACUGAGUGAGGACCUAGAAUUUUAAUGUCUAAUAUGCGGUGUGAAUUAAGAAGCGGCCUUG  
CUAUGCUGACCUUUUCAUAUUCUAAUCUUUGCUUUGCUGACCUCUCAGGCCUCUUCUGGCAACAGUUAGGCUUUU  
GAGAGGAGAGAGAGCUGAGACUGUUGGCUCUUCUCCAUUUUAUGAGAGAGCCACAUGACAUCAGCCCAUAGACUGUGG  
AGAGUAUUCAGAUUAUCACAUUCUGCGAUUCUGCGAUUCCAGAAAGGCUGGUCAUGAAAAAAUUCCCUCUUCAGU  
UUACAUAUAUGGCAGUGCUCCAGUGCCAUGACAGUUUUAAUCUUCUGGUUCCAUCUGCAUAGAUUUUCAGUCUCUAAU  
UGAGGAAAAUCAUCUGUUUUUCUCAGGAGCCCCUUGAUUCAAGUUUACACAAAUGUGCCUUUGGAGACUAUCCUGU  
UAAUUUAAACAGUUCAGAUCCACUUGUAUGUGAGACAGAUGCUCUCUGGCCAUUCAGCCAGGUACCACUAAAGGAG  
GUACAGGCACUUCUAGAUUUCUGUUGAGGCCUGGAAGGGGGCAAAACAUAUCAGGAAGCAGUUGAAGAUAAAGGGGUU  
UACCAUGGAAGAGAAGAUCCAGGUGCCUUCUUGGAAUUGCUUGGUUGAAAAGAGAUGAAGAUAGAGGGUCCUGGA  
AAGAGGAAGAACCAGCCAGGAAAAUUAUACCAUUAAGCAAGACUGGCAUCAGCAAGUAGUUCGCAGUGUUGGUUGUUC  
UUGGUUUCGCAGGAUUUUAUAGGAGAUGGACCUUCUCCUAAAAGUCUUAUCUUCUAAGUCUCCUAAGUCUUGGACUU  
UUCAAGGCCAAAGAUUUAAAGGCCAAGUGGACCAUACGGGAGAUUAGUUUCCAUCCAGACAGCCAAGCUCUAGCA  
UCCCUUGGAUUUGGAUGGAUGGUUUCCAUUGGGCCUUGGACAGAUUGGACCCAGCACUGGCACAGGGUUGACUUGGA  
GGAAUAAGCUCUUGGAAACCUCAAUUAAGCGUUUGGGGUUAUGAACAUUAAACAUAUCUGAAUCUGGAAACAUAUC  
ACACAGCGGGUCCAAGGAAAAUAGCAGAAAGGCUGGCAGCAGGCCAGGGCCAGGGGCCAAUUCGUCCUCAAGACAA  
UUCUUCUAGGAGAAAUGACAGCAGGUUUAGGACAGCAGAAUUCGCUUCUUGUUGCCCAGGGCUGGAGUGCAAUGGU  
GCAAUCUCGGCUCACCACAACCACUGCCUCCUGGGUUAAGCGAUUCUCCUGCCUCAGCCUCCUGAGUAGCUGGGAU  
UACAGGAAGUACAAAAACAUCUUGCCGUUUGCUGGAAUGAUGUACUGCUGAAGGCAAUGGACACUGGGGUUGUUUG  
UCCCUAAUCACAAGAACCUCAGUAAAACUAGGCACUCAGUGCUCUCCAGACUGCAGUGGUGGUGGAGCUGAGAGGA  
CUGUGUUUGGAGGAGUAAAUGUCCACUCUAGUCUAUUUUUUUUCUAGGCCCUUUGUCAUGGCCUUCUUAUGUGGUA  
AGAUCUGGAAGGGUACAAUAUGGUGAUAGAUGUAACUUUUGCUUUUGAGAGGUAAGGUGAAGUGAGGCCUGAGUAAA  
GAUUCACCAGUUUAGGAAGACAUAUGCAGUUUGUUUCUAUUUGUUCAAUUCAGUUUACUAGGUUAGAGAAGAAGAUAG



AGACUUCAAGCAAGGCCUGGCACAUAUAUCCCUUGGCUAUAUAGUCAUAUAUAUAUCUCUCUUGAGGAUGUA  
AAAAAAAAAAAAAAAAAAAA

# DNA

>NR\_110775.1 Homo sapiens long intergenic non-protein coding RNA 1254 (LINC01254), long non-coding RNA  
GCCTTCTTGGCCGAGTGGTGGCATTCTGCCTGCCCCCTGTGGGCATCATTGAGATTCTGCTCCCCAGCTT  
CCGCAGTGTCTCCGTTTGTGATGGAAAGTCAGCATCCCTTGCCTTAGGAGAAACCCAGGTATCTGGTGTAT  
GGAAGAACTTTTGTAGGGGAAGCTTGAGACTGGCCAGTCCACACTCTGCTTAACCAAGGGAAGGGCACCCT  
TCTACCACCAGGAGATACCTGCTGTGGGACACAGTGTCTCCAGCCATGCAGAAGCTCACACAGGCCTG  
CAGCAGTTATTTCATCCGTGCACAGCTGCCACTGGCCAGCAGAGCCTGTGACGGGGCCCTTCACAGGTAATT  
CCCAAGATCAAAACAGCCTCTTGTACTTAAAAATAATTGCTTTGCCACCATTTCCTCAAGATGCTGCAGAGTG  
CTTCTGAATTCTGTTTCATTTCAAAGAACCCACTTCTCTATTTGAAAAACGGGTATTTTAATGTCTGCCA  
GGCCACAATTCCATGAGGCATGATGGTGTGCAGAATGTTCTGGAGATTTCCATAAGAAAGATCTCTAAGG  
GCCAGAACTGACTAAAGTCATGTAGGCCACCTCTAAAAGAGGCAAGGCTCAAAGATAAATACTAGCATCA  
AAAGAGAGGTCTTTGGTGTGATATGCCCCATGTCTTTCAGCTTTGTTGTGGCCAGTCATCGTTGGTGGC  
AGCTGACTGGTGGCAGAATCACACCCACTGTGTGATTCTCTGCAGAAGGCTGGTGATTTGAGGATGGACA  
GGAAGTTCTGAACTCAGGAATAACCATGCATTTTCACAAGCGTTTTTCACTTTGCCTTAAGATTTGTAGAAG  
AGTTAAGTTGGGATCCCATCATCAGCAAAACCTAACACCACCATCCTGAGATAAGCTAAGAAAAGCTAAG  
AAAAAGATAAGCTGAGAAAAAGCTAAGGAAAAGATTTGTCAACCTTTCTTCTAGATCAGAACAGCAAAACGTG  
ATGCAGGATTTTCTGAGGTTGGGACCGGACCGAAACGTTTTCATCTTCTATTTTTGTTTACTCAGCTTC  
AACTGCCACCTTTTATGCTATCCTGGGGGCAAGGGGGCACCCATGTGAATGAGAGATACTGGATTTGGCC  
AAGATCATTAGGCAAGGGTGCCGTTCCACACAGTAATGCCCTTGACAGGCACAAGGATGGAATAATTATGCC  
AGGAATGCGATACCGCAAGCCTGAACACAGAGAGGACACGACGTTGGCACAGGCCTGTTGGGTCTTGAC  
TTCAGCCTGCAGAGGAGCTGGAGGAGGCTGGCAGACTCTGCTCACAAATGGGAAGGCCAGCTGCCAATG  
GCTTTCTCTCTGCCCATGTAACTTTTGTGGGGAAATGTGTGGACACAGCTTGAGGCTTTGTATCCA  
CCCTGTGAGTTGGTGAGATAGAGAAGAGATGGGTTGATGTTATTGAGGCACCTACTGCTCAGATGGGGCA  
TTGTTGGAGCCCATAGATGGGGCATTTGTTGGGTTGTAAATGAGAGAAGTTGCTAGTGGCCCCCTGGAGCAA  
GACACCTGGAGCTTCTATTTCAGCTTGCTCTTCTTCAACATCCATGCTTCTGGAACCTTGCAATCTCTCAG  
TGAAGGATGGAAGCCCTTTGGCCTTGCCCTCCCGCCAGCTGATGGGATGAGAGGCAGATGCAGGCAGCT  
GTCAGGAGAGCAAAGGGAAGGGAGATACTGGGTCCGGAAACCTGCTGCTGCTGCGACAAGTTCTCCGGG  
TCCAGGCTGTGATTTCCACAATCTGCATCCAAACCACAGAGTGAAGCCGAAATTTGTGTGAATGATCGGGA  
GTGTTTGCAGAGTTCAACCACAGTGTATCACGTTTTATCCAAATCTCCTAGTCCAAAAAAGAATACAC  
GCCCTGTTTTTATCTCAAAAAAAAAAAAAAAAAA

# RNA

>LINC01254  
GCCUUCUUGGCCGAGUGGUGGCAUUCUGCCUGCCCCUGUGGGCAUCAUUGAGAUUCUGCUCCCCAGCUU  
CCGCAGUGCUCCGUUUUGUGAUGGAAAGUCAGCAUCCCUUGCCUAGGAGAAACCCAGGUUUCUGGUGAU  
GGAAGAAUUCUUGAGGGGAAGCUUGAGACUGGCCAGUCCACACUCUGCUUAACCAAGGGAAGGGCACCACU  
UCUACCAACCAGGAGAUACCUUGCUGUGGGACACAGUGCUGCUCCAGCCAUGCAGAAGCUCACACAGGCCUG  
CAGCAGUUAUUCAUCCGUGCACAGCUGCCACUGGCCAGCAGAGCCUGUGACGGGGCCUUCACAGGUAAU  
CCCAAGAUCAAAACAGCCUCUUGUACUUAUUUAUUUGCUUUUGCCACCAUUAUUAAGAUUCUGCAGAGU  
CUUCUGAAUUCUGUUAUUAUUCAAAGAACCCACUUCUUAUUUGAAAAACGGGUUUUAUUGUCUGCCA  
GGCCACAAUUCUAGAGCAUGAUGGUGUGGCAGAAUGUUCUGGAGAUUUCUUAAGAAAGAUUCUUAAGG  
GCCAGAACUGACUAAAGUUAUGUAGGCCACCUCUAAAAGAGGCAAGGCUCAAAGAUAAAUACUAGCAUCA  
AAAGAGAGGUCUUUGGUGUGAUUAUGCCCCAUGUCAUUCAGCUUUGUUGUGGCCAGUCAUCGUUGGUGGC  
AGCUGACUGGUGGCAGAAUACACCCACUGUGUGAUUCUCUGCAGAAGGCUGGUGAUUUGAGGAUGGACA  
GGAAGUUCUGAACUCAGGAAUACCAUGCAUUAUACAAAGCGUUUUCACUUGCCUUAAGAUUUGUAGAAG  
AGUUAAGUUGGGAUCCAUCAUCAGCAAAACCUAACACCACCAUCCUGAGAUAAAGCUAAGAAAAGCUAAG  
AAAAAGAUAAAGCUGAGAAAAGCUAAGGAAAGAUUUGUCAACCCUUCUUCUAGAUCAAGAACAGCAAAACGUG  
AUGCAGGAUUCUUGAGGUUGGGACCGGACCGAAACGUUUUCCAUUCUUAUUUUUGUUUACUCAGCUUC  
AACUGCCACCUUUUAUGCUAUCCUGGGGGCAAGGGGGCACCAUGUGAAUGAGAGAUACUGGAUUUGGCC  
AAGAUCAUUAAGGCAAGGGUGCCGUUCCACACAGUAAUGCCUUGCAGGCACAAGGAUGGAAAAUUAUGCC  
AGGAAUGCGAUACCGCCAAGCCUGAACACAGAGAGGACACGACGUUGGCACAGGCCUGUUGGGUCUUGAC  
UUCAGCCUGCAGAGGAGCUGGAGGAGGCUGGCAGACUCUGCUCACAAUGGGAAGGCCCAGCUGCCAAUG  
GCUUUUCCUCUCUGCCCAUGUAAACAUUUUUGUGGGGAUUGUGUGGACACAGCUUGAGGCUUUGUAUCCA  
CCCUGUCAGUUGGUGAGAUAGAGAAGAGAUUGGCUGAUGGUUAUUGAGGCACUACUGCUCAGAUUGGGCA  
UUGUUGGAGCCCAUAGAUGGGGCAUUGUUGGAGUUGUAAUGAGAGAAGUUGCUAGUGGGCCCCUGGAGCAA  
GACACCUGGAGCUUCUAUUCAGCUUGCUCUUCUUAACAUCUUCUGGAACUUGCAUUCUUCACAG  
UGAAGGAUGGAAGCCCUUUGGCCUUGCCUCCCGCCAGCUGAUGGGAUGAGAGGCAGAUAGGAGGAGCU  
GUCAGGAGAGCAAAAGGGAAGGAGAUACUGGUCUCCGGAACCCUGCUGCUGCUGCUGCAAGUUCUCCGGG  
UCCAGGCUGUGAUUUCACAAUCUGCAUCCAAACCACAGAGUGAAGCCGAAAUUGUGUGAAUGAUCGGGA  
GUGUUUGCAGAGUUAACCAACAGUGUUAUCACGUUUUAUCCAAUUCUUCUAGUCCAAAAAAGAAUACCAC  
GCCCUGUUUUUAUCUCAAAAAAAAAAAAAAAAAA

DNA

>NR\_110778.1 Homo sapiens long intergenic non-protein coding RNA 1255 (LINC01255), transcript variant 1, long non-coding RNA  
GCTTGCAGGTCCAAACCACTGGTAGCAGCCCCTGGTATATCCAGGACATCAGCACATAGAACCAGTGAAA  
GGGTCCCTCCCTCATAGTGACGCATGTCATAGACTCAGATTTATACAAACAAATGCTGAGCAAACCATGAA  
GAGTCTCTGGTATTTTCAACAATATCATCACAGAGGAACTGTATTGATTTTCCTTGAACTTTTCAAATGTA  
GAGGAGCCTTTAGAAGGAAGCCTTGAGCATGAGGACAGACCCCCCTCATCCAACCACCACCTGACTCTGT  
GTGAACCTGGAACTGTTAGAATGTCTGTGCTGTGATAAAAGGTCATCTCCCTACAATGTTATGATACAGA  
CCTCAAACCTACAAACATGAGGAACTTCTGCCTCCAGGTTAACTGCTTACCCACTGTACAAGACACGTTA  
CACACAGTCCAGGAGGCGGAGCTTCTGAGATATCTAGAAACAGCTTAGAGGCAAAATGACAAAATAAAGC  
AGCAACAACAAATAAAACCAATCTTCTCGAACTGGC

RNA

>LINC01255  
GCUUGCAGGUCCAAACCAUCUGGUAGCAGCCCCUGGUUAUAUCCAGGACAUCAGCACAUAGAACCAGUGAAA  
GGGUCCUCCCUCAUAGUGACGCAUGUCAUAGACUCAGAUUUUAUACAAACAAUUGCUGAGCAAACCAUGAA  
GAGUCUCUGGUUAUUUCAAACAAUAUCAUCACAGAGGAACUGUAUUGAUUUCCUUGAACUUUCAAUUGUA  
GAGGAGCCUUUAGAAGGAAGCCUUGAGCAUGAGGACAGACCCCCUCAUCCAACCACCACCUGACUCUGU  
GUGAACCUGGAACUGUUGAAUUGUCUGUGCUGUGAUAAAAGGUCAUCUCCCUACAUGUUAUGAUACAGA  
CCUCAAACCUACAAACAUGAGGAACUUCUGCCUCCAGGUUAACUGCUUACCCACUGUACAAGACACGUUA  
CACACAGUCCAGGAGGCGGAGCUUCUGAGAUUAUCUAGAAACAGCUUAGAGGCAAAUGACAAAUAAGC  
AGCAACAACAAAUAAAACCAUUCUUCGAAACUGGC

DNA

>NR\_120518.1 Homo sapiens long intergenic non-protein coding RNA 1387 (LINC01387), long non-coding RNA  
GTATTTCAAAGCTCTCTGGGTCTGGGGATGAGCAGTGCCCTCTCATCCTGTAATAATCGTGGACATCAC  
ACACTGATGTACAGACATGGTGCCAGCGCCTCCCTTCCCTTGGGGTCTTGGAAAACCCGGTGCCACAATGG  
GATCTAAGTATCCTTGGATCAATACGGATTTCGTGTTTCTCACACCGAAGTTCAGGGCTCTGGCAGCTCCA  
GGTCCCCCTGAGGCCCTGAGGAAAGAGTCACTTGAAGTGGAGTGGACCCTGGTACTACTTGCAATTCCCTCC  
AAGAATTCAACCCAGCCAGCAAGACGGAGGGCCTCCCAAATGCTGCGATCTGCTCCGTGCTGCTCTGCTG  
GGCCGTCACTGCCCCCTGTGCGTTCTGCGGGCGAGGTCTTCTCCCAGAAGCGAGACAATGAACAGGACA  
GAAGTGAATTCAATTGGCCAGACCCCTCAAACGTGTGGTGAAGAGGAACGTTTCTTGGAAATTAAGCTGCCG  
CTAAGTAAAGGTCAAGGCACGGGGCAGCTGGATGTCCGTGTGGATCCTGCAAATGGAGAGGCTCTGCTGT  
GGAAACAGAATGGAACCTAACCTCAGCTAAAAACAGTGGTGGAG

RNA

>LINC01387  
GUAUUUCAAAGCUCUCUGGGUCCUGGGGAUGAGCAGUGCCUCUCAUCCUGUAAUAAUCGUGGACAUCAC  
ACACUGAUGUACAGACAUGGUGCCAGCGCCUCCUUCUUGGGGUCUUGGAAAACCCGGUGCCACAAUGG  
GAUCUAAGUAUCCUUGGAUCAAUACGGAUUCGUGUUUCACACCGAAGUUCAGGGCUCUGGCAGCUCCA  
GGUCCCCUGAGGGCCUGAGGAAAGAGUCACUUGAAGUGGAGUGGACCCUGGUACUACUUGCAAUUCUCC  
AAGAAUUAACCCAGCCAGCAAGACGGAGGGCCUCCCAAUGCUGCGAUCUGCUCCGUGCUGCUCUGCUG  
GGCCGUCACUGCCCCCUGUGCGUUCUGCGGGCGAGGUCUUCUCCCAGAAGCGAGACAAUGAACAGGACA  
GAAGUGAAUUCAUUGGCCAGACCCUCAAACUGUUGGUGAAGAGGAACGUUCCUUGGAAUUAAGCUGCCG  
CUAAGUAAAGGUCAAGGCACGGGGCAGCUGGAUGUCCGUGUGGAUCCUGCAAUUGGAGAGGCUCUGCUGU  
GGAAACAGAAUGGAACUUAACCUCAGCUAAAACAGUGGUGGAG

DNA

>NR\_145452.1 Homo sapiens long intergenic non-protein coding RNA 1415 (LINC01415), transcript variant 1, long non-coding RNA  
GGTAAACAAAGGCAATTCGTTCTGTAAAAATACTCTAGATTCTTTCTGAGGACTGGGCCTACACTGCTC  
ATAGTGGGCACCTAAAGTCAGCATTTCAGCCAACTCAGCGGGCTTTAAGATGGAGACTCTTAAACCTCCTG  
CATCAAAAAGACATAAGGGAATGTCCCTGAGAAGAGCCTGTGTCTCCTTTGAAGAGAGAGAGAGATTG  
ATTCCTGCCTCCTTGCAATTCGAACCGGCATTTTCCAGAACACTCCAATTTGAATCACAGTGGAGGGTCAT  
GGGAGGGATTTGGCACAGGGGAGTCTTGGGTCTTTGGTTTTCCACATTGATCAATGGGATTGATTTTTTC  
TGTTTTTGTTTTTGTTTTTAAAAAGAAGAGAATTAGTTCCTTTTTCTGTCTCCAGGATTGAAAACATGAAGG  
CAAAGAAGAGAAAACCTCACAAATATGTCATTAACTTTGGGTATCAATATTAGTGGAAGAATCAATGGTGC  
AAAGAATCCTAAAGGACTAGATAATCCGCATATTCGACTTCCCTGATTATGTGTTACTGACACTAACATTT  
CAGAGTGTGGAGACCTGCCCATCTGGGGAGAGGGAGAGACAAAGACCCCCCTGCTTCTGGTACTTGATT  
CACACATAATGCCCTCCATTTACTGCTTTCAAGAAATAACCTGTTTCTAATCTTAAATTTCAATCTACTG  
ATCACAATAATCATAGAGATCTTAGCCTTGAAAGAGACTTCATGAGACCATGTGACCAACTTTCTGACGCA  
GGATTAGAACATCCGACATTAAATGTCTCAGTGCAGCAGAAATTTCCAGCGACTTCGGTGGCGGGGAGAG  
CAGCACCTCTCAGGCACAGCTGTGCGCATCCCTCGGGCCCCACCGACCGCACCATCTGACCGCGGGAAAC  
GAAATCTGAGCTCAGGAATTTGAACTGCCCCACGCACGTTCTGTTCCCGGATAAATCTCCTAGAGGACCGT  
GATTTTTTCCACTTAGAGATTATTTAGGGAGATGTCTGGATGGGACAAGTAGACAAATGGCGGCCCGAGG  
AAAATGCAGGAACTCTACATTGTAGACGCTTAAGCACCAACTGTCTGGGCCCCGGGGCAGGGAACGGGA  
GACATTATCCACCGGAAACATCACACCCCCGGGGCTCCTGGCATTTTTCTACATCAGTGAATGTGCCAGCG  
AAGAAGAGTGTGGGGAAATTTCTGAACATAGAATTCAATTCCTGAAACGTTAAGTCGTGAAGTGGGTG  
CTTCAGCTGTCCCCAGCTTTAGGATTTTAACCCAGCTTTGGTTTTGATCACCAGAGATTATTCCTTATA  
ATCAAAATCAGCAAAAGCGTTCAATTACCTATTACTGGTTGAGAAAGATTCCGTTCCCCAGCTCATTGTA  
TCGGTTCTTGGACCAAGATGTTAATTATCGGCAGGCATTACACAGGGGGTTAATATGGCCCCCTCGAC  
ACCTTGCCTCGTACCAGAGACACCAAAAGCTGCCGCTGAGGGATAATAGAGAATGGGAAAAGCTGGTCAT  
GAAAAACCTCTTTTTATTCTTACTTGCAGCTACCCCTTTTGACATTCTTTTTTTTAAACACTAAATGGAGATT  
ACTGAATTGATAACTTTTTGGGTTTTCTCTGTCCACACTGGGGTTTTTTTTTCCCCCGTTTGT'TTGAAGGTT  
TTTTTGGTTTTGGTTTTGGTTTTGGGGGGAGGGGAAGGGGAAGTGGATAGGGAGATGGAAGAGTGTCT  
GTTACTGGTTTTATCAAATCCTGTTAGGTCTTGTCTTTCAGTGTAAATGTAGAATGGAGAAGTTGCATAAG  
TACATGATTGACAAACAAGGTCTCTTAGAAGAGAGTTAAGGAGTAGGAAATATAATGTGTCTGGAGAAA  
AAGAAAGAGAAAAACCTTAGTATGACACACTGGCCTTTAAATAGAGGACACATGAATATGCAAAGGAGAG  
GCACGTGTGAAATAAGGTGTGCCTTGCTGAGCCCTCCCGCCCCACCCCCCATGTATCAAGAACCTTTACT  
TACATTATCTCATCTAATTCTACCCACAACCCAAAGAGGAAGGGCGATACTTTTAATTCTGGGTTTTTACAG  
ACAAGAAATTTGTATCTCAGAGGCCCAAAGTAAATTTGCCTGAGGGCATATAGCTACTTAGGACAGAATTA  
GAATTGATTAAAGAGTCAAAAATCTTTTGAGAATTAATGTTTTTAAACTCTCGATTAGTTACCAAGGGAAT  
CTGAGAAATTAATTAACCTTTTGGGGGGATCTTTAGATTAGTGGGGAATTTATGTTAAGCCCAAAGAAAGA  
CAAGCCCGTGAATTTTCTTGTTATCTATGAAGTGGTTTTGGTGAAAGGTGTGACAATTTGAGAAAACCTGAA  
AAGTGCTGAAATTCCTTAATAAGGTTCTGTTTAACTGATAGAGCTACCAGATATAATTAGGCAGATAT  
CCATTTTCTTCTGGAAGCTTCTATTATTTGAGAAGAAAACTGAAAAGCTTTAGACTGTTTCAAATTAAGG  
ACAATTTGAATTTTAGTTGGAAGCGGATAAACTATCTGTATGATTGAGTTTAAAGGCATGGAAAGACT  
ATTACGAAGTATTGATCCCACTCAGTGAGAGCAAGCACAGCTTTCAAATGATACAGATCTGGCTATGTAAT  
TTGAATGGTGACTGTGCTAGCTGTGTGACCAAGGGCACTTTCTTAACCTCTCTGGGCCTCTGAGTCCT  
CGTCTTTAAATGAGACAAAATAAGCCCTTGCAAGACGCTTGTGATGATAAAATAAAGAGTATGGGTGAA  
AGTCCTTAACAGAATGCCTGATATGTAGCAGATACTCAACAGAGTTAGCAATGTTTCA'TTAA'TTAAAGC  
ATTTGAGAGCAGGATAGGGAGCACCCTAACTTCAGCTCTTCAACAATTTTGCCTGGGGCTGGCTCTGGG  
GAATAGACTTGGATTCTCACGAGTATGTGAATCTTCAGTTACTTCCCTGAAAGGACAGACAGTTATAAAA  
GCAAGCAGTGAAGTCTGGGAAGGTGGAGGAGAATGGTTATGGAAAGTTATCCCCACATCATAAGTCTTCC  
TGATCTTGAGATCAAACAACACACTTTCAGAAACAGCAAGAAATTAAGGCTGAAGCAAAATACCCCCCTG  
TATAATTTTAAAGTCAGTTAATAATGAAGGTGTAAATAAAACAGAAATGTCTCTGTCTTACTTTAAATCT  
TGAACAAATAAGGGATTTTTTTCTTTAGTGTTTTTTAATAGTTTAATCATTTTTTTAAGACACAATTTTTG  
CCTAGTTACTGTTTACTAACTGCCCTGCCAAAAATTAGTTATTACTTCAGGACTTATGTTTGAATAGAAC  
TGCGAAATCCTGCTTTAAAAAGTACTATGAAACAATTCATCAAAATGTTTTCTCTGATATTTTTTACCA  
GGTAAAGGCAAGATTACTTCTGGAGATTTTCTTTGAAAATAATGATTTTTTTTTTCTGATTATGAAAGTA  
ATACACGTTTATTATGGACAATTTAGTATAAAATGAGAGAACAAGCTATAAAGGAGCAAACGAGAACACC  
CTTATTCTCACAGTAAGAGTTAACCCTTTTAATATTTTGTATGATTTCTTTTCACTCTTTTTTACCTTTA  
TTTTTTTAGCCTTGGTACGAACCTATGGAGTATAAAATGTGTCATTCTTGTTTTTATATTTATTTTCTCC  
CATGTAACATAAAAGGATCTGTAACATTTTTAGTGACTGTCTAATTTTATATCATACCAATATGATATAT  
TAGTATCATTTTTTAAGAAACAATAGAGAATCTCTATTGTTGAGTGTCTGTGAGTCCCAGTTTTTTGCTA  
TTGTAATGTTGACTGTGCTAGCTGTGTGACCAAGGGCACTTTCTTAACCTCTCTGGGCCTCTGAGTCCT  
CTTCTATAACAAGAATTAAGGTTTATATAAATCTTCTAATGCTTTTGAATATATTTGTCGTATTGATT  
TTAGCAGTTTTTCAAGCAGCAATAGATGAAGAGAGCTGTTCTCTCCTAATGCCCTCTAGTCATAGTG  
ACTGATACCACAGCCAAAAACAAAAACAAAAACAAAAACAAAAACAAAAACAAAAACAAAAACAAAAAC  
CTAAAGAAAAGATCTTGTTGTTTTATTTGTATTTTGGGAGGGCTACTGCCATTGAACAGCTTTTCCAGAT  
GTTTATTAGCCATTTTCTCTTTGTGAACCTATCTATTACTGTCTTTTGCCTGTTTTTCTATTGAGGCCTT

AATTTTTTTAACTGTATTTATATAAAACCCACGTATCAGCCCTTTGTTGTAATTGTGGCAGTTTTTTTCCC  
ATTTTACTTTTTGCATTTTAAATGTTATTCATGATTTTTTGATACATAAAAAATGTTAAAGATTTATTTAGAT  
AAATGTATCAAGTATTTTTTAATTTTTTTATGTTGCTCTACAGAAAATCACCTAGATATTCACCTATTTT  
TTTCTACTTGCATTTTTATGAGCTTGTTTTTACATTTAAGTCTTTATTTGCTTTTGTACTTTATTTGCATTG  
TGAGTTAAGAATCTGATTTTTCCCTCAAATAGCTAGGCAGTTTTTCCAATACCGTCAACTCAGTGTCCAT  
CTCCCCCTAGCTGATTTACTGTGCCTCCACATCAGAGACCTCTTTTGGTTGATAAAGATGCAGGGATGCT  
CTTCACAGTACAGTTATTAACAGCCAGAGCAATATATGAGGATCAACTAATCGGAACCAAGTCAATAAGCAT  
CAGATTGGGCCAGCAAGCACATCCCAGGTGAGGACCAAAATTGCAAAATGGGACCTAAGAAGTTCCTGCAT  
GCAACAAAAAGTGGTTTTCTTTCAAAGAAGGATATGTTTAAATTAACCTAACATGTTTAAAGGGGGACTCT  
CCTGTAAGTTTCATTTGGAGCACGTGGAGTTTACATTAGTTTTCATTGTGTTCATTCAACAAACACTAGTT  
AAGCCACCCCTATGGACAGGTTCTGTTTTAGTATCTCAATAGGTGAGAGAGAGAGAGACTCTAAACAG  
ACAGACAGATAGATGATAGATAGACAGATAAAATAGATAGATAATCTCCCTATTTCTCTCTTTCTGTGTGT  
GTCTTTCTCATATTGTCAAAAAATGCTACTGAGCTCAGTGAAATTCACATTAAGTGGTAGTACCAATTTT  
CTATTATTGATGTCACATCATTTCTCTTTTCAATTACAATAATTGTTACTGTTCTTTGGGATACATTCCCGG  
TCAACTCATCCTTTCTAATATGACACAAATTGCATCTGCCGGTAATTTGGTCTGCTTATTAGTTGATAG  
ACATTGTAAGTCTTTGGTTTGTCCATCTGTTCTCATAGTTTGTCTGCTCCTTAAAGAATTGGATTATTTG  
CTACACTTTTTCAGGTGGCTTTATTTTGCATATATTTCTGAATTTTTCTTTTTTCATGATAACAATACCAGAA  
GGATGTCCCAATTTTACATTCTATCTTTCTTTTGCTTTGAAATAAATTTAAATCAC'TTCAAGAAAGATTA  
ATAAAGAAATTATATTTCTATCGAATCTTTATGCAATTAGGTTACTGAAC'TTTGAAATCAAAGGAGGAA  
ATCAGATTTTGTGGTTTTGCCCAGTATACTATAGAATGTCAATATTTGTTCTATTATAAAAAATAATTTCT  
ATATATTATATTCTTATATTAGAACAACTATTCTATATATAAATATGCTAATATAAGAATAAGACAGCA  
ATAGACCAATTGTTCTGTTAAGGAAGACTTGTGTGATTCACTGGTGCCACCCATTGTAGATGGGGTGAG  
AGGATCGGGACTCTGCTGGGATCTGACATCTGGGAATTTCCCAAGGGTCCAACATTGGATGGACAAGTGGGA  
GCAGAAGAATCCATATTAGGAGGAACAAAGGGTGAGGAATTCACGGGTCAATTGTGACTCCAGAGCCTG  
GAAAACGAACAACACCATGAGACTGCTACCAGGCCAGACTCTATCCCGGGGAGAAGGAGTGTACAGAA  
CCAAGCAGGTCTTTGCCACAGAGCATGGGAGAGAAATGGGGCCCCAAAGTGTCTATGAATTGACCGAAAA  
TGAGGAGGAAAAATGTTGACGTCATCCAATTAGCAGAGATTAACCAGATTAGGTTTTCTGGCACTTGGCAG  
AATGGTAACCTCAAAATAAAAACTGAGTTTAGTAAAAAACAA

RNA

>LINC01415

GGUAAACAAAGGCAAUUCGUUCUGUAAAAUACUCUAGAUUCUUUCUGAGGACUGGGCACUACACUGCUC  
AUAGUGGGCACCUAAAGUCAGCAUUCAGCCAACUCAGCGGCUUUAAGAUGGAGACUCUUAACCUCUG  
CAUCAAAAAAGACAUAAGGGAAUGUCCUGAGAAGAGCCUGUGUCUCCUUUGAAGAGAGAGAGAGAUUG  
AUUCUGCCUCCUUGCAAUUCGAACCGGCAUUUCCAGAACACUCCAAUUGAAUACAGUGGAGGGUCAU  
GGGAGGGGAUUUGGCACAGGGGAGUCUUGGGUCUUUGGUUUUCCACAUUGAUCAAUGGGAUUGAUUUUUUC  
UGUUUUUGUUUUUGUUUAAAAAGAAGAGAAUAGUUCUUUUUCUGUCUCCAGGAUUGAAAACAUGAAGG  
CAAAGAAGAGAAAACUCACAAUAUGUCAUUAACUUUGGGUUAUCAUAUUAUGUGGAAAGAAUCAUGGUGC  
AAAGAAUCCUAAAGGACUAGAUAAUCCGCAUUAUCGACUUCUGAUUAUGUGUUAUCUGACACUAACAUUU  
CAGAGUGUGGAGACCCUGCCCCAUCUGGGGAGAGGGAGAGACAAAGACCCCCUGCUUCUGGUACUUGAUU  
CACACAUAUAUGCCUCCAUUUACUGCUUUCAAGAAUAUAAACUGUUUCUAAUUCUAAAUUUAUCUACUG  
AUCACAAAAUCAUAGAGAUUUAGGCCUUGAAAGAGACUUCUAGAGACCAUGUGACCAACUUUCUGACGCA  
GGAUUAGAAACAUCCGACAUUAAAAUGUCUCAGUGCAGCAGAAUUUCCAGCGACUUCGGUGGCGGGAGAG  
CAGCACCUCUCAGGCACAGCUGUGCGCAUCCUCGGGCCCCACCGACCGCACCAUCUGACCGCGGGAAAC  
GAAAUCUGAGCUCAGGAAUUUGAACUGCCCCACGCACGUUCGUUCCGGAUAAAUCUCCUAGAGGACCGU  
GAUUUUUCCACUAGAGAUUAUUUAGGGAGAUUCCUGGAUGGGACAAGUAGACAAAUGGCGGCCCGAGG  
AAAAUGCAGGAAACUCUACAUUGUAGACGUUAAGCACCAACUGUCUGGGCCCCGGGGCAGGGAACGGGA  
GACAUUAUCCACCGGAAACAUACACCCCCGGGGCUCUGGCAUUUUCUACAUCAGUGAAUGUGCCAGCG  
AAGAAGAGUGUGGGGAAAUUUUCUGAACAUAGAAUUAUUAUCCUGAAACGUUAAGUCGUGAAGUGGGUG  
CUUCAGCUGUCCCCCAGCUUUAAGGAUUUAACCCAGCUUUGGUUUUGAUCACCGAGAGUUAUCCUUAUA  
AUCAAAUCAGCAAAAGCGUUCAAUUAACCUAUAUCUGGUUGAGAAAGAUUCCGUUCCCCCAGCUCAUUGUA  
UCGGUUCUUGGACCCAAAGAUUUAUUAUCGGCCAGGCAUUCACAGGGGGUUAUAUGGCCCCCCCUCGAC  
ACCUUGCCUCGUACCAGAGACACCAAAAGCUGCCGUGAGGGAUAAUAGAGAAUGGGAAAAGCUGGUCAU  
GAAAAACCUUUUAUUCUUAUCUUGCAAGCUACCCUUUUGACAUUCUUUUUUUAACACUAAUUGGAGAUU  
ACUGAAUUGAUAAACUUUUGGGUUUUCUCUGUCACACUGGGGUUUUUUUCCCCCGUUUGUUUGUAAGGUU  
UUUUUGGUUUUGGUUUUGGUUUUGGGGGGAGGGGAAGGGGGAAGUGGAUAGGGAGAUGGAAGAGUGUUCU  
GUUACUGGUUUUAUCAAAUCCUGUUAAGGUUCUUGUUCUUCAGUGUAAUGUAGAAUGGAGAUGGCAUAAG  
UACAUGAUUGACAAACAAGGUCUCUUAAGAAGAGAUUAAGGAGUAGGAAAUUAUAAUGUCCUGGAGAAA  
AAGAAAGAGAAAAACCUUAGUAUGACACACUGGCUUUUAAUAGAGGACACAUGAAUAUGCAAAGGAGAG  
GCACGUGUGAAAAUAAGGUGUGCCUUGCUGAGCCUCCCGCCCCACCCCCCAUGUAUCAAGAACUUUACU  
UACAUAUUCUACAUCUAAUUCUACCCACAACCCAAAGAGGAAGGGCGAUACUUUAAUUCGGGUUUUUACAG  
ACAAGAAAAUUUGUAUCUCAGAGGCCCAAAGUAAAUUGCCUGAGGGCAUAUAGCUACUAGGACAGAAUUA  
GAAUUGAUUAAAAGAGUCAAAAAUUCUUUGAGAAUUAUUGUUUUAACUCUCGAUUAAGUUAACCAAGGGAAU  
CUGAGAAAUAUAUAAACUUUUGGGGGGAUCUUUAGAUUAGUGGGGAAAUUAUGUUAAGCCCAAAGAAAGA

CAAGCCCGUGAAUUUUCUUGUUAUCUAUGAAGUGGUUUUGGUGAAAGGUGUGACAAUUGAGAAAAACUGAA  
AAGUGCUGAAAAUUCUUUAAUAAGGUUCUGUUAUAAACUGAUAGAGCUACCAGAUUAUAUAGGCAGAUUAU  
CCAUUUUCUUCUGGAAGCUUCUAUUAUUGAGAGAAAAACUGAAAAAGCUUAGACUGUUUCAAUUAAGG  
ACAAUUGAGAAUUUAGUUGGAAAGCGGAUAAAUAUCUGUAUGAUUGAGUUUAAAAGGCAUGGAAAGACU  
AUUACGAAGUAUUGAUCCACUCAGUGAGAGCAAGCACAGCUUUCAAUGAUACAGAUUCGGCUAUGAAU  
UUGAAUGGUGACUGUGCCUAGCUGUGUGACCAAGGGCAACUUUCUUAACCUCUCUGGGCCUCUGAGUCCU  
CGUCUUUAAAAUGAGACAAAUAAGCCCUUGCAAGACGCUUGUGAUGAUAAAAUAAAAGAGUAUGGGUGAA  
AGUCCUUAAACAGAAUGCCUGAUUAUGUAGCAGAUACUCAACAGAGUUAGCAAUGUUUCAUUUAAUUAAGC  
AUUUGAGAGCAGGAUAGGGAGCACCACUAACTUUCAGCUCUUCACAAAUUUUGCCUGGGGCGGGCUCUGGG  
GAAUAGACUUGGAUUCUCACGAGUAUGUGAAUCTUUCAGUUAUCCUUGAAAGGACAGACAGUUAUAAAA  
GCAAGCAGUGAAGUCUGGGAAAGGUGGAGGAGAAUGGUUAUGGAAAGUUAUCCCCACAUCUAAGUCUUC  
UGAUCUUGAGAUCAAACAACAACUUCAGAAAACAGCAAGAAUUAAGGCUGAAGCAAAAUACCCCCUG  
UAUAAUUUUUAAGUCAGUUAUAAUGAAGGUGUAAAUAAAACAGAAAUGUCUCUGUUCUUAUAAUUCU  
UGAACAAAUAAGGGAUUUUUUUCUUAUGUGUUUUUAAUAGUUUAUUAUUUUUUAAGACACAAUUUUUG  
CCUAGUUACUGUUUACUAACTUGCCUGCCAAAAAUUAGUUUAUUAUUCUUCAGGACUUAUGUUUGAAUAGAAC  
UGCGAAAUCUGCUUUAAAAAGUACUUAUGAAACAAUUCAUCAAAAUGUUUCCUCUGAUUUUUUUUACCA  
GGUAAAAGGCAAGAUUACUUCUGGAGAUUUUCUUGAAAAUAAUGAUUUUUUUUUUCCUGAUUAUGAAAGUA  
AUACACGUUCAUUAUGGACAAUUUAGUAUAAAAUGAGAGAACAAAGCUAUAAGGAGCAAACGAGAACACC  
CUUAUUCUACCCAGUAAGAGUUAACCACUUUUAAUUAUUUGAUGAUUUUCUUCAGUCUUUUUACCCUUUA  
UUUUUUUAGCCUUGGUACGAACCUAUGGAGUAUAAAAUUGUGCAUUCUUGUUUUUAUUAUUUAUUUUCUCC  
CAUGUAACTUAAAAAGGAUCUGUAACAUUUUUAGUGACUGUCUAAUUUUUAUUAUACAAUAUGAUUAU  
UAGUAUCAUUUUUAAGAAAACAAUAGAGAAUUCUUAUUGUUGAGUGUCUGUGAGUCCAGUUUUUGCUA  
UUGUAAAUAUGCUAAAACAAAAUUCUGUGUGCAUAAAUCUUGAGUUUAAGAUUAUUUCGUUAAGAUAGA  
CUUCUAUAUAAAGAAUUAUAGGUUCAUUAUAAUACUUCUAAUGCUUUUGAAAUUAUUGUCGUUAUGAU  
UUAGCAGUUUUCAGUCCAAAGCAGCAUAUAGAUAGAGAGCUGUUCUCUCCUAAUGCCUCUAGUCAUAGUG  
ACUGAUACCAAGCCAAAAACAAAAACAAAAACAAAAACAAAAACUUAUUUAUUAUUUGAUUAGG  
CUAAAAGAAAAAGAUUCUUGUUGUUUAUUUGUAUUUUUGGGAGGGCUACUGCCAUUGAACAGCUUUUCAGAU  
GUUCAUUGACCAUUUUCUUCUUGUGAACUAUCUAUUACUGUCCUUGCCUGUUUUUAUUGAGGGCCUU  
AAUUUUUUUAACUGUAUUUAUUAUAAACCCACGUUAUCAGCCCUUGUUGUAUUGUGGCAGUUUUUCCC  
AUUUUAUCUUUUGCAUUUUAUUGUUAUUAUGAUUUUUUGAUACAUAUAAAUUGUUAAGAUUUUAUUAGAU  
AAAUGUAUCAAGUAUUUUUAAUUUUUUUAUGUUGCUUACAGAAAAUCACCUAGAUUAUACCUAUUUU  
UUUCUACUUGCAUUUUAUAGAGCUUGUUUUUACAUUUAAGUCUUUAUUGCUUUUGUACUUUAUUGCAUUG  
UGAGUUUAAGAAUCUGAUUUUUCCUCAAAUAAGCUAGGCAGUUUUUCCAAUACCGUCAACUCAGUGUCCAU  
CUCCCCCUAGCUGAUUUACUGUGCCUCCACAUCAGAGACCUCUUUUUGGUUGAUAAAGAUGCAGGGAUGCU  
CUUCACAGUACAGUUAUUAACAGCCAGAGCAAUAUAGAGGAUCAACUAAUCGGAACAGUCAUAAGCAU  
CAGAUUGGGCCAGCAAGCACAUCACAGGUGAGGACCAAAUUGCAAUUGGGACCUAAGAAGUUCUGCAU  
GCAACAAAAGUGGUUUCUUCAAAAGAGGAUAUGUUUAAAUUAACUUAACAUUGUUUAAGGGGGACUCU  
CCUGUAAGUUUCAUUGGAGCACGUGGAGUUUACAUUAUUGUUCAUUGUGUUAUUAACAACACUAGUU  
AAGCCACCCCUAUGGACAGGUUCUGUUUUAGUAUCUCAAUAGGUGAGAGAGAGAGAGAGACUCUAAACAG  
ACAGACAGAUAGAUGAUAGAUAGACAGAUAAAUAGAUAGAUAAUCUCCUUAUUUCUCUUCUUGUGUGU  
GUCUUUCUUAUUGUCAAUAAUAGCUACUGAGCUCAGUGAAAUUACAUAUAGUGGUAGUACCAAUUUU  
CUAUUAUUGAUGUCACAUCAUUUUCUUCUUAUACAAUAAUUGUUACUGUUUUUGGGAUACAUUCGCGG  
UCAACUUAUCCUUUCUAAUUAUGACACAAAUUGCAUCUGCCGGUAAUUGGUCUGCUUAUUAUUGAUAG  
ACAUUGUAAGUCUUUGGUUUUGUCCAUCUGUUUCUUAUAGUUUGUCUGCUCCUUAAGAAUUGGAUUAUUUG  
CUACACUUUUCAGGUGGCUUUAUUUUGCAUAUAUUUCUGAAUUUUUCUUUUUAUGAUAAUUAUACAGAA  
GGAUGUCCCAAUUUAUUAUUCUUAUCUUCUUCUUGCUUUUGAAAUAAUUAUUAUACUUAAGAAAGAUUA  
AUAAAGAAAUUAUAUUUCUUAUCGAAUCUUUAUGCAAUUAAGGUUACUGAACUUUUGAAUCAAAGGAGGAA  
AUCAGAUUUUUGGUUUUUGCCAGUAUACUUAUAGAAUGUCAUAUUGUUUAUUAUAAAAUAAUUAUUCU  
AUUAUUAUUAUUCUUAUAUUAAGAACAAUACUUAUUAUUAUUAUUAUUAUUAUUAUUAUUAUUAUUAU  
AUAGACCAAUUGUUCUGUUAAGGAAGACUUGUUUGAUUACUGGUGCCACCCAUUGUAGAUGGGUGAG  
AGGAUCCGGGACUCUGCUGGGAUUCGACAUCUGGGAAUUCCEAAGGGUCCAACAUUGGAUGGACAAGUGGA  
GCAGAAGAAUCCAUCAUUAAGGAGGAACAAAGGGUGAGGAAUUCACGGGUCAAUUGUGACUCCAGAGCCUG  
GAAAAACGAACAACAACCAUGAGACUGCUACCAGAGCCAGACUCUAUCCCGGGGAGAAGGAGUGUACAGAA  
CCAAGCAGGUCCUUGCCACAGAGCAUGGGAGAGAAAUGGGGCCCCAAAGUGUCUAUGAAUUGACCGAAAA  
UGAGGAGGAAAAUGUUGACGUCAUCCAAUUAAGCAGAGAUUAACCAGAUUAAGGUUUUCUGGCACUUGGCAG  
AAUGGUAACTUAAAAUAAAAACUGAGUUUAGUAAAAACAA

## DNA

>NR\_110755.1 Homo sapiens long intergenic non-protein coding RNA 1416 (LINC01416), long non-coding RNA  
AGTGTACAGAGCTGCTGTCTTTTGTAGATGGGAAAAAGGGTATTTGTTATGTCTCAGGAAAGCTGGATGA  
CTATCTCATTCTCTGATGATGGAGAAGAATACTCACAACTGCTCCCCACCTCCCACCTGTGAAATGCCAA  
TATGGTGGAAACAGAAGGGGAGAAGAAAGAACAGCGGAGACACTGATCATTCGAAACCAAAGAAGCAGCTC  
ATGCATAATGGAGAGCTATCTGCATGCAAATTGCTAGGAGTACTTCCCTACTTTTCTGGGATATTGTATTT  
AGCCCTCTGTACTCTATTTCAGAAGAGTTCTGTTCCCCAGGCCAAGAAGGGGAAATACATTGAAGACAACA  
TTAAGTGTGTGAACTAAATGCACAAGAATCAGGAGCATCTTAACGCCATGGCCTGAACATGATAGGTACT  
GAAGAACTATGGATTAATTATTTTTGATTGATTGATTGATTGAAAATGTGTCACTATAAAAAAGCAAATG  
TGAAGCTTACAGAGGGATAGTGGTGCAGTTAAATGCTAAAGTTAAATCTCCTTTTCTGGCAGCTGCAGAA  
AGATTCTTATCTGCCTCCTATACTTGCTCTGAGGATATTTAAATTTGTAGAGCTCTAAGTGGCTGCCCTC  
AATTTGCTTCAAAGATAATAACGTCACCTTACAGTTTATAAAGCACCTTGTTTACATCCCTTTGGAGACCT  
ACAGCAATCCCGTATGAATCTGGGGATTATTTATTTCTTTTTTTCAAATAAGAAAACCTGAAGCACAGAGGA  
AGGAGTTACACATTAAGGAGCCAGGGAACCTGTACATTAGTTAAGGTAATGCTAGCAGCTATAACAAATAA  
ATGCCCCAAATCTCAGAACTTAATACAATAAATCTTACTTTTTTGATTATCCTATGGCACCATACGGTGTTC  
TGGGTAGATGAAGAGTCTTCCACAAGGTATTTTCCAGGGATCTGTGGCTCTACCTTCTCTAGTCTTCAAAT  
CTTCTGCATCCAACAAGCAGATGGAGAAATGAGGAATTGGAATAGGCATTCCTTAGTTTAAGCTCTTTGGT  
CCAGAACTGAAACACATAACATCTGCTGATATCCTATGACTAGAACATCACCTGGCCCTCATCTGGATAC  
AAGACGATGGTACTGAGAAATAATTGCAGCCTGGGCAGATGCTTTTTCAGTGCAATTCTATTCTAAAGAAA  
AGGCAGACTGAATGCTACATGCCAGTAAGTAGAATCTCCAGGACTCAAAAACAGACACATGACATTAAT  
GCAGTGCTCTTGCTACTACAACACACTGCCTCTGTATTTCAGAGTTGCCCTCAGCCTAGATCATAGTTTTGG  
AGTGAGTTAGAACCTGATCCTAACACTTGACAGTATTAAAGGGGGACTGTCACCAGTGGGACGAACCCCT  
TGAATCAAGCATGAGGAGAACCCTGGCTTATGCCCTGGCTCTGCCCTATCTGACTGATTGAGTAAATCATG  
AAATCACTCTGCATTTCTTTTTTCAAAGTCAATTGATACAAACCTATACCTTCTCAACTTTTCCCAATTAA  
GCTACTAGAATCTTACATTATTTTTTCCCTAAGATGCTCAGACATTCTCTATAATGTTATACGAGTCCGTGT  
TATAAGAGCCCCCTCAACAATAAGCGGTAGCTGATGAAACCATATCAATACATAATTCTATACAAAGGTAA  
GAAACTGGAAACATTATTTGGCCTTCATAGACCTTGCTTGGATAACTGCTCAATTTCTATGAAGGTATCG  
GAATTATTGGGAGGTGAAATTGGCCACTCCCGTAACTATTTCTGCCGATCTCCAATTGGGAACCATAGAG  
CTTCATGACCTAAGGCTCCTACCAGTTACCATCTGAAAATGTCTTTTGTCTCTGTAATCTTGACAAGTGA  
ATTCCAGTCACACCCATCCTAAGAAGAGTGTGCCTGGAAATACTGGTTTTCTTCTTCTCAAGCTGTCTGA  
ATCCAGAAGTATATATTAATCTGGAAGTGGCTGGAGGTGATGGAAAAGAGAGGATGTTGAAAAAAGCACC  
CTTGGTGAAGTGGAGCAGCAACTCGCTCAGAAGCCTCATGAGTCTGTAACATCGTTTGAAGTCCAAAGCT  
TTCTTCATCACTCATAAATCCATAATCATCACTCCACCTCGGAAAAATCTCACTCTGCTCTTCTCTATCT  
TCTACATGAAATGTATCAGGAAGAAAAATTAACATAAGGAACTTTCACCAGCTTTATAAAATCTTAACCC  
TTTTGTACACTTGTCTTGATAATTTTAAGAACTAATATCAATAATCATTAACGTTGAACCGTGCCCA  
AAAAAAAAAAAAAAAA

## RNA

>LINC01416  
AGUGUACAGAGCUGCUGUCUUUUUGUAGAUGGGAAAAAGGGUAAUUUGUUUAUGUCUCAGGAAAGCUGGAUGA  
CUAUCUCAUUUCUGAUGAUGGAGAAGAAUACUCACAACCUGCUCCCCACCUCCCACUGUGAAAUGCCAA  
UAUGGUGGAAAACAGAAGGGGAGAAGAAAGAACAGCGGAGACACUGAUCAUUCGAAACCAAAGAAGCAGCUC  
AUGCAUAAUUGGAGAGCUAUCUGCAUGCAAAUUGCUAGGAGUACUUCUACUUUUUCUGGGAUUAUUGUAUUU  
AGCCCUUGUACUCUAUUCAGAAGAGUUCUGUUCUCCAGGCCAAGAAGGGGAAAUACAUGAAGACAACA  
UUAAGUGUUGGAACUAAAUGCACAAGAAUCAGGAGCAUCUUAACGCCAUGGCCUGAACAUAGUAGGUACU  
GAAGAACUAUGGAUUAUUUUUGAUUGAUUGAUUGAUUGAAAAUGUGUCACUAUAAAAAAGCAAAUG  
UGAAGCUUACAGAGGGAUAGUGGUGCAGUUAUAAUGCUAAAGUUAUAAUCUCCUUUUUCUGGCAGCUGCAGAA  
AGAUUCCUAUUCUGCCUCCUAUACUUGCUCUGAGGAUUAUUAAAUUGUAGAGCUCUAAGUGGCUGCCUC  
AAUUUGCUUCAAGAUAAUAACGUCACCUUACAGUUUAUAAAGCACCUUGUUACAUCUCCUUUGGAGACCU  
ACAGCAAUCCCGUAUGAAUCUGGGGAUUUUUUUAUUUUUUUCAAUAAGAAAACUGAAGCACAGAGGA  
AGGAGUUACACAUUAAAAAGCCAGGGAAAUUGUACAUUAGUUAAGGUAAUGCUAGCAGCUAUAACAAAUAA  
AUGCCCAAAUUCUGAAACUAAAUACAAUAAAUUUACUUUUUGAUUAUCCUAUGGCACCAUACGGUGUUC  
UGGGUAGAUGAAGAGUCUCCACAAGGUUUUCAGGGAUCUGUGGCUCUACCUUCCUCUAGUCUUCAAU  
CUUCUGCAUCCAACAAGCAGAUUGGAGAAUGAGGAAUUGGAAUAGGCAUUCUUAUUAAGCUCUUUGGU  
CCAGAACUGAAACACAUAAACUUGCUGAUUCCUAUGACUAGAACAUCACCUGGCCCUCUUCUGGAUAC  
AAGACGAUGGUACUGAGAAAUAUUGCAGCCUGGGCAGAUUCUUUCAGUGCAAUUCUAUUCUAAAGAAA  
AGGCAGACUGAAUGCUACAUGCCAGUAAGUAGAUUCCAGGACUCAAAAACAGACACAUGACAUUAAAU  
GCAGUGCUCUUGCUACUACAACACACUGCCUAGUUAUUCAGAGUUGCCUCAGCCUAGAUAUAGUUUUGG  
AGUGAGUUAGAACCUGAUCCUAACACUUGACAGUAUUAUAAAGGGGGACUGUCACCAGUGGGACGAACCCU  
UGAACUAAGCAUGAGGAGAACCUGGCUUUAGCCUGGCUCUGCCCUAUCUGACUGAUUGAGUAAAUCAUG  
AAAUACUCUGCAUUUCUUUUUUUCAAAGUCAUUGAUACAACCUAUACUUCUACUUCUCCAAUUA  
GCUACUAGAAUCUUAUUAUUUUUCCCUAAGAUUCUGACAUUCCUAUAAUGUUUAUACGAGUCCGUGU  
UAUAAGAGCCCUCAACAAUAAGCGGUAGCUGAUGAAACCAUAUCAAUACAUAUUAUACAUAAGGUAA



GAAACUGGAAACAUAUUUGGCCUUCAUAGACCUUGCUUGGAUAACUGCUCAAUJUCUAUGAAGGUAUCG  
GAAUUAUUGGGAGGUGAAAUUGGCCACUCCCGUAACUAUJUCUGCCGAUCUCCAAUUGGGAACCAUAGAG  
CUUCAUGACCUAAGGCUCUACCAGUJACCAUCUGAAAAUGUCUJUGUCUCUGUAAUCUUGACAAGUGA  
AUUCCAGUCACACCCAUCCUAAGAAGAGUGUGCCUGGAAAUACUGGUUUUCUUCUUCUCAAGCUGUCUGA  
AUCCAGAAGUAUAUAUUAUCUGGAAGUGGCUGGAGGUGAUGGAAAAGAGAGGAUGUUGAAAAAAGCACC  
CUUGGUGAAGUGGAGCAGCAACUCGCUCAGAAGCCUCAUGAGUCUGUAACAUCGUUUGAACUCCAAAGCU  
UUCUUCaucacUCAUAAAUCCAUAUAUCACUCCACCUCGGAAAAAUCUCACUCUGCUCUUCUCUAUCU  
UCUACAUGAAAUGUAUCAGGAAGAAAAAUUAACAUAAGGAACUUUCACCAGCUUUAUAAAAUCUUAACCC  
UUUUGUACACUUGUUUCUGAUAAUUUAAGAACUAAUAUCAUAUAUCAAUAAAACGUUGAACCGUGCCCA  
AAAAAAAAAAAAAAAA

# DNA

>NR\_104164.1 Homo sapiens long intergenic non-protein coding RNA 1443 (LINC01443), long non-coding RNA  
ACTTCAGGCCACTCCTGCACCCCGGGACTTTCACCTCTGAGAAATCCTTTACCGTGGAAGCAGGTTATGCT  
GTACAATTGGAGGCATTGTACTGATCTCTTCTACCACACTGAATATCGCATGATATCCTGAAAGTGATC  
TAGATGAAGTTGTGCCAACACATCATGACCTGCTGGATTCCACACTTCCCAGTGCAGCAGAGCCCTGAC  
CTCACTCTCACATGCCTTATGTCCCTGGAATCACGTAACAGCCACCGCCAGGCAGTCATCGCAGAGAAAA  
CAAGGAAAAACACCACGTGGATTCCCTCGGGATGAGATCAGGTGCACGCTGCCAGCTCAATGGGTCCACCA  
CCCACCAGAGACTCCAGCCCAGTGTGCGAGCCGGCGGGGCGGCACCCACTGCTCTCCCACTCCAGACCTG  
ATTTTCACATTACATGGAGCCACGGTCAGGTGGTCTTCGGTCCCATAAAGCCTATGCATGTATTTTCCTC  
AGAGAGCCACCGAGGAGAGAGAGATGGCTAAAAACAAGAAGAGATCGGTGGATGACTACATCTGCCGGCC  
AGAAGACCACTCTGATAGCTTTCATGAGGATGACTGCGTCTCCAGCCAAAAGGCCACTCTGATAGCTTC  
CATGAGGATGACTGCATCTCCTGGCCAAAAGACCACTCTGATAGCTTCCATGAGCTCTCCCTGGGGCATC  
CATGGAGAAGATATTTTGTAGGGAGAAAATCCCCAATGCTTCTTGAATCTTGCAGCCACACAGGGATTTT  
CTACAAGCAACCCAGCCTTGAGCTATAAAGACCTGATCACTTTCCTGGGTGAAGACAGCAGACTGACTCA  
GTTATTCTGTGGATAGGTGACTTGATCAATGAGTTGGCGAGAGTTCTAAGATGTGTCTTTCAGGCACATA  
TCTCAGATTTGTAAAAATTATTATTTATTTATTTAATTCATTTTTTTTTTTTGGAGATGGAGACTCACTCTGT  
CACCCAGGCTGGAGTGCAGTGGCACAATCTCGGCTCACTGCAACCTCCACCTCCCAGGTTCAAATGATTC  
TCCTGCCTCAGCCTCCTGAGTAGCCGGGATTACAGGCACCTGCCACCATGCCAGCTAATCTTTGTATTT  
TTAGTATAGACAGGGTTTCAACATATTGGCTGCACTGGTCTCCAACCTCCTGACCTCAGGTGATCCACCTG  
CCTCAGCCTCCCAAATTGCTGGGATTACAGGCATGAACCACTGTGCCTGGCCTCAGATTTGTAAGATAAT  
TTAAACAAGACTCAGTGTCTCTGCATCTCACTGGTTGTATATTGCATTAAAAATGGTGATAATTTCTCCC  
CTAATCAAACCTGTGCCAATGCTGGCAAGGACACTAATGTTATGAAGACAAGAGGTAGCTGAAAAATAAA  
GAGACAATCAGCAGACAGACCCAGAGGTCAGGCAGGGCTGGCCTGAGGACATGGCTCGTCCC  
ACAGGAACTGGGAACCTGGTGGTCAACAGCAGTGCAGAGTCTGTTCTCTCTCTGAGGGACAGACAGGCC  
ACCAGCCTGACAGAGACCGGCATTAGTGGGCAGCTGCCAGGAACCTAGCAGGGATTGCAC'TAGACTTTATAG  
CGCCATAGTTCAGAATTGCTGGATTTGGAGACAAAAATCCAGGTTTGAATTGTGATTTCTATTTCTTACTGC  
TCCGTGTCTGGGGCAGCCAGGTCAGCTCTCTGAGCCCTATGGTCTCCATGGCTGAGTGAGAATGCCCGC  
CTCCACTCAGAACCAGCCAGTGTGGTGCCAGCAACCTATCTAACACAAGCAAAGAGGATTTCTTAATGAA  
AACATTTTGTCTTGACAAAAACAATACTCAATTTAAGAAACAGCAAATGCA

# RNA

>LINC01443  
ACUUCAGGCCACUCCUGCACCCCGGGACUUUCACUCUGAGAAAUCCUUUACCGUGGAAGCAGGUUAUGCU  
GUACAAUUGGAGGCAUUGUACUGAUCUCUCCUACCACACUGAAUAUCGCAUGAUUCCUGAAAGUGAUC  
UAGAUGAAGUUGUGCCAAACAUCUAGACCUGCUGGAUUCACACUUCCCAGUGCAGCAGAGCCCUGAC  
CUCACUCUCACAUGCCUUAUGUCCUGGAAUCACGUAAACAGCCACCGCCAGGCAGUCAUCGCAGAGAAAA  
CAAGGAAAAACACCAGUGGAUUCUCCUGGGAUGAGAUAGGUGCACGCUGCCAGCUCAAUGGGUCCACCA  
CCCACCAGAGACUCCAGCCCAGUGUCGCAGCCGGCGGGGCGGCACCCACUGCUCUCCACUCCAGACCUG  
AUUUACAUCUACAUGGAGCCACGGUCAGGUGGUCUUCGUGCCAUAAAGCCUAUGCAUGUAUUUUCCUC  
AGAGAGCCACCGAGGAGAGAGAUUGGCUAAAAACAAGAAGAGAUAGGUGGAUGACUACUCCGGCC  
AGAAGACCACUCUGAUAGCUUUCAUGAGGAUGACUGCGUCUCCAGCCAAAAGGCCACUCUGAUAGCUUC  
CAUGAGGAUGACUGCAUCUCCUGGCCAAAAGACCACUCUGAUAGCUUCCAUGAGCUCUCCUGGGGCAUC  
CAUGGAGAAGAUUUUUUGAGGGAGAAAUCCCCAAUGCUUCUGAAUCUUGCAGCCACACAGGGAUUUC  
CUACAAGCAACCCAGCCUUGAGCUAUAAGACCUGAUCACUUCUCCUGGGUGAAGACAGCAGACUGACUCA  
GUUAUUCUGUGGAUAGGUGACUUGAUCAAUGAGUUGGCGAGAGUUCUAAGAUGUGUCUUUCAGGCACUA  
UCUCAGAUUUGUAAAAUUAUUAUUUAUUUAUUUAUUUAUUUUUUUUUUGAGAUGGAGACUCACUCUGU  
CACCCAGGCUGGAGUGCAGUGGCACAAUCUCGGCUCACUGCAACCUCACCUCUCCAGGUUCAAUGAUUC  
UCCUGCCUCAGCCUCCUGAGUAGCCGGGAUUACAGGCACCUGCCACCAUGCCCAGCUAAUCUUUGUAUUU  
UUAGUAUAGACAGGGUUUCACCAUAUUGGCUGCACUGGUCUCCAACUCCUGACCUCAGGUGAUCCACCUG  
CCUCAGCCUCCCAAAUUGCUGGGAUUAACAGGCAUGAACACUGUGCCUGGCCUCAGAUUUGUAAGAUAAU  
UAAAAACAAGACUCAGUGUCUCUGCAUCUCACACUGGUUGUAUAUUGCAUUAUAAUUGGUGAUAAUUCUCC  
CUAAUCAAACUGUGCCCAAUGCUGGCAAGGACACUAAUGUUAUGAAGACAAGAGGUAGCUGAAAAUAAA  
GAGACAAUAGCCACGAGACAGACCCAGAGGUCAGGCAGGGCAGGGUUGCCGUGAGGACAUAGGUCUGUCC  
ACAGGACCUGGGAACUGGUGGUCACAGCAGUGCAAGGUCCUGUUCUCCUCUGCAGGGACAGACAGGCC  
ACCAGCCUGACAGAGACGGCAUUAUGUGGCGAGCUGCCAGGAACUAGCAGGGAUUGCACUAGACUUUAUAG  
CGCAUAGUUCAGAAUUGCUGGAUUUGGAGACAAAUCCAGGUUUUGAAUUGUGAUUCUAUUUCUUAUCUGC  
UCCUGUCCUGGGGCAGCCAGGUCAGCUCUCUGAGCCCUAUGGUCUCCAUGGCUGAGUGAGAUGCCCGC  
CUCCACUCAGAACCAGCCAGCAGUGGUGCCAGCAACCUAUCUAACACAAGCAAAGAGGAUUUCUUAUGAA  
AACAUUUUGUCUUGCACAAAAACAUAUCUCAAUUUAAGAAACAGCAAUUGCA

>NR\_110783.1 Homo sapiens long intergenic non-protein coding RNA 1444 (LINC01444), long non-coding RNA  
GCCATAGTAGCTCTGGGAACTGAATCTCGGGGACCAGGAACAGTCTCGCATGTCATTGTAATCTGGATTCTGAACTCTGACTTTCCACAGTCTTTGAGTCACTGAGCACCAGGATCAACTTTTCACAGAGGATCCAGATAATCAGCCAGCTTGAGTCACACTCCTGCAGCTTGGCTAGGGTAGGGATTCTTGACCAACAGTCCCATAAGATCTTATCCAGTCAGGAGGTACTGGACCAATCTGAAGTGCAGCCAAGACCGGGAGCCACAGACCTGGAACC  
TGGGTACTCAAAGAGTTGTCCACGTGCCAGCAGCACTGGCCCCCTCCAGGAGCTTGTTAGAAATGTAGAACCTCAGAGCCTACATTAAAGATATTGAATCGGAGTCTGCACGTCACATCTGAGAAGCCATGAGCTAAGCTGATGCCATTTCAGCTGGGTAGCATCGCAGTCACTGTGCAACTTTTAAACCTACAGCTGCCCAGGCCCCACTGAGACCTGCTAAATTTCGAGCTCCTTGTTAGTGGGGCCAGGGCCCTGGGACTTCACACAAAACCTCTGCAAGTCATCACTGATGAGAAAAACCAAGACTCGATGAGAGTCTCCTGAGCTCGGGGGAAGAAGCTGCATAACCGGCACACTTCAGAAAAGACCGAGGAAGAGAGCGTCGCTTCAGCTAGGGATCTGATTAGTCATGCCTGGTAGGCTCTGCTGAGCTGGGGGCTCTTGGGTTTGTCTTGTGAGCTGAATTAATATATTAATGGATTTCT

RNA

>LINC01444  
GCCAUAGUAGCUCUGGGAAUCUGAAUCUCGGGGACCAGGAACAGUCUCGCAUGUCAUUGUAAUCUGGAUUC  
AUGAAUCUCUGACUUUCCACAGUCUUUGAGUCACUGAGCACCAGGAUCAACUUUCACAGAGGAUCCAGAU  
AUCAGCCAGCUCUGAGUCACACUCCUGCAGCUUGGCUAGGGUAGGGAUUCUGACCAACAGUCCCAUAAGA  
UCUUAUCCAGUCAGGAGGUACUGGACCAAUCUGAAGUGCAGCCAAGACCGGGAGCCACAGACCUUGAACC  
UGGGUACUCAAGAGUUGUCCACGUGCCAGCAGCACUGGCCCCUCCAGGAGCUUGUUAGAAAUGUAGAAC  
CUCAGAGCCUACAUAUAAAGAUUUGAAUCGGAGUCUGCACGUCACAUCUGAGAAGCCAUGAGCUAAGCUG  
AUGCCAUUCAGCUGGGUAGCAUCGCAGUCACUGUGCAACUUUUAAACCUACAGCUGCCCAGGCCACUGC  
AGACCUGCUAAAUUCGAGCUCCUUGUAGUGGGGCCAGGGCCCUUGGACUUCACACAAAACUCUGCAAGUC  
AUCACUGAUGAGAAAAACCAAGACUCGAUGAGAGUCUCCUGAGCUCGGGGGAAGAAGCUGCAUAACCGGCA  
CACUUCAGAAAAGACCGAGGAAGAGAGCGUCGCUUCAGCUAGGGAUCUGAUUAGUCAUGCCUGGUAGGC  
UCUGCUGAGCUGGGGGCUCUUGGGUUUUGCUUGUUGAGCUGAAUUAUAUUAUUAUGGAUUUC

>NR\_110791.1 Homo sapiens long intergenic non-protein coding RNA 1477 (LINC01477), long non-coding RNA  
GTCTCTGAGTCTCTGTCTCTCTGTCTCTCTCACAGTCTGTTACTACTTAATACAGTGCTTATTGGCCTG  
AGATTGGACATTATTTAAAAAGCAATTTGGAGAGTTTTCTCCATTTTCAGGCAAGAAAACATGCACATTTTT  
TCTGATATGGCATGGGACATCGAAAAATAGTTTTGAACAAAAATTTTAAAATTTTGGCCCAAAGAAAGCA  
AATACCCCCTGCAACAAACAAGATGTGTCACAATAAGTCATGATTTTACAATCCCTTTCAAGACTGCCCTGT  
TGCCCTTAGCAATCCCTAAAGCAAAAACAAACAAACAAATCTTTTCAGCATATCTTCATGAAACTGTCT  
GGGATGTGACAAAACCTTTGAGAAACAGTTTTGTGATAATGGTTTTGCACCTTTATTGGTACTTCTCCACAG  
GAGGTGGTGAATGGCTACTTTCAAATACATAGAGCTATCAAAGGCTAAAGTCAATAAAAAACCTCCATAG  
AATAATTGGAGAGGAAAAGAAAAGGGGGAAAAAAAAGAACATAAAACGAATGAAAAGGCAAGTAGGACCTAT  
AAATATAAAAGCCTAAGGAGTATATTTTGGGAGAACAGATGATGCAAAGCAAATTTGGGAATAGTTATTG  
GAGGATCAAGGAAGGCAAATAAAAACAATAAGATATATGATGCCCTGTCTCTGCCTCAAGTCTAGCTCAT  
CAGACAGTTTTTTCATTCCATTTTGTATATATGAGTTTCATCTGACTACTGCCAACAGAAAGTGCTTGGAT  
TTCCTGACTTTTTTCACTGTCAAAAGAAATAATAAGCTGATGAGATTCAAAGTACTTCTCTCTCTGCCA  
CCGCGTGAAGAAGGATGTGTTTGTCTCCCTTCTGCCATAATTTCAACAGGAAAAGACAAGACGATACTG  
TATGAAAGTCTGACCAACATAAAAGGGTGCTACAAGGATGCCCCCAAGGCTCAGGATGTTGGAGAGTTGAG  
GCACCATGAGTAACCACAATGCAGAAATGAAGAATAGTTCTTCTGGTGTGAGGATCCACTGGGTTGCCACT  
GACCCATTGCCTGAGGGTATGCGATGAAACCAGAATCAGCAACTGTAGATGGCAGCTCAGAAGGGGAAAC  
GACACATCTAATAACCAACAGGAATGGCTATTAATTAGCTGAAATGACAATAATTAACAGAAATGACAAG  
TCTAATAAAATTTTCACTTAAGTGTGTGTCACATGGCAAAAAAAAAAAAAAAAAA

RNA

>LINC01477

GUCUCUGAGUCUCUCUCUCUCUCUCUCUCCUCACAGUCUGUUACUACUUAAUACAGUGCUUUAUUGGCCUG  
AGAUUGGACAUUUAUUUAAAAAGCAAUUUGGAGAGUUUUCUCCAUUUCAGGCAAGAAAACAUGCACUAUUUU  
UCUGAUUAGGCAUGGGACAUCGAAAAAUAGUUUUGAACAAAAUUUUGAAAUUUUUGGCCCAAAGAAAGCA  
AAUACCCCUCGCAACAAAACAAGAUUGUGUCACAAUAGUCAUGAUUUACAACCCUUUCAAGACUGCCUGU  
UGCCCUUAGCAAUCCCUAAAAGCAAAAACAAACAAACAAAUUUUUCAGCAUAUCUUCAUGAAACUGUCU  
GGGAUGUGACAAAACUUUGAGAAAACAGUUUUGUGAUAAUGGUUUUUGCACUUUAUUGGUACUUCUCCACAG  
GAGGUGGUGAAUGGCUACUUUCAAUACAUAAGAGCUAUCAAAGGCUAAAGUCAUAAAAAACCUCCAUAG  
AAUAAUUGGAGAGGAAAAGAAAAGGGGGAAAAAAAAGAACAUAAAACGAAUGAAAAGGCAAGUAGGACCUAU  
AAAUUAAAAAGCCUAAGGAGUAUAUUUUGGAGAACAGAUGAUGCAAAGCAAAAUUGGGAUAGUUUAUUG  
GAGGAUCAAGGAAGGCAAAUAAAAACAAUAGAUAUAUGAUGCCUGUCCUCCUGCCUCAAGUCUAGCUCAU  
CAGACAGUUUUUCAUUCUUAUUUGUAUAUAUGAGUUUCAUCUGACUACUGCCAACAGAAAGUGCUUGGAU  
UUCUUGACUUUUUUCACUGUCAAAAAGAAUAAUAAGCUGAUGAGAUUCAAAGUACUUCUCCUUCUCCUGCCA  
CCGCGUGAAGAAGGAUGUGUUUGCUUCCCUUUCUGCCAUAUUUCAACAGGAAAAGACAAGACGAUACUG  
UAUGAAAGUCUGACCAACAUAAGGGUGCUACAAGGAUGCCCCCAAGGCUAGGAUGUUGGAGAGUUAG  
GCACCAUGAGUAACCACAAUGCAGAAUGAAGAAUAGUUUUCUGGUGUGAGGAUCCACUGGGUUGCCACU  
GACCCAUUGCCUGAGGGUAUGCGAUGAAACCAGAAUCAGCAACUGAUGGAGCAGCUCAGAAGGGGAAAC  
GACACAUUCUAAUAAACCAACAGGAAUGGCUAUUAAUAGCUGAAAUGACAAUAAUAAACAGAAAUGACAAG  
UCUAAUAAAUUUUCACUUAAGUGUUGUCACAUUGGCAAAAAAAAAAAAAAAAA

# DNA

>NR\_110792.1 Homo sapiens long intergenic non-protein coding RNA 1478 (LINC01478), long non-coding RNA  
GCACTTTTCTTTGTGCATTACACGATGCATTTTCTTTCTTATCACCAAACGTGTTTTGAAAGATAAAAG  
TACTTCCTGAATATGTGGATGGTGAGCCACGTGAATGGAAGACATGGAGATATGGACTGTTAACACCTTG  
TCAAACATTTATTGTCCCTTCCACCTCTAACTTCTGTGATAATAGGTGAACAGGACCCACGTGGTGCAG  
AATACTGCGATACACACTGCGGAATAATTAGTGCAGAACACACGTGGATTGCTCAGTACAACCTTGTTC  
ATCACATCCTCCTGTTCACTGAAGAATTATGGAAATATTCTCTGAGCTGCTTTCTCCCTGCCAACGAG  
TCATCTCTGTGTGAAAAGGCCAAGCTTATAAATCCTGAAGAAAGAGACATTATACAAATGCAAGCTGTTGT  
CACAACAATGATAAGAAATCAGGAGTCGAAAGATGTGGAGTAAGGGGGAATTTTCAGAGAAACCACAAAAC  
ACAAAATAGGAAACAGAGACAGGAGAAGATTGCTATGACAAAATTCAGAGAGGTGAAATCTTTGGCAGCC  
TCTTATTTCTCTGGAGAATATGATATTGTCTAGGCTGAGGTGGAAGAATCACATGGTCATACTGTTGAAGA  
GGTCTTGAAACATTGGGCTTTCTCTACAAGCGGAAGGATAGCACTGGCAGCCATCCACTGGCCCAGCAA  
TATCCTGGATTGAGACGATATCATTTGCATTACTTGTCTGAATGAAACATAGTGAAAATGACTGCAGATAA  
CCTCAACTAAGTCCAAGATATCATTTTCAAATCTGGACCAGCCCTTGCCATCTAGACTGAACAGAGATTCT  
CAGTTTCCAGGAGAGTAGATGGAGTAATGATAAAAGCACCTCCCAAACTTTTGCCTTGGTACTACAGAG  
TGGCACATAACTAAACATTATCAAGGAATTTTACAGCCCTAGGCCCTTCTATTACTGTGTATTACAGTCTG  
CTGTAATCATTCTAATGGTCTAAGATGTTGCAAGTAATTTACTCACGGCCTGAACACCAGAAGTGCCAAA  
ATTGCCTGGGAGTTTATTCTGCATCCAACCAAGTACCAGGAAGGAGGATGTATTACTTCTCGTTTCTCTA  
CAAGTGTCTAGTGCAAAATCCAGCCATCAAAACAAAACCTTAGACCTAAAAGCTTTTAGATTACAGCGATTATT  
GCAGATTTTACATGAGATAAAAAATGTAATTGCTCCATTTCTTTTATTCTTTCTTTTCTTTCTTTCTCT  
CACTGTATATTTTAGATTGTCTCTGCTTGACTGCCAGGTGAGACCAGCACACAAAGATATCTGTCTAAG  
ACTGGGGAGCTGCAGTGTCTTTTTCATAAGAAAATGAAATGCTTGAAATTTCTCTTCCAAATGAAATCACA  
AAACTTCCATGGTCATTTTCAATTTTAAATTAATTTATGTCTATGTAAACTCATGCATTTGCCATATAACGGA  
ATAATATTTCCAGCCATGTGGATAGTGACAGAAATGAGCTGAAGGCAGCAATACCTTACAGGCAGGAGTG  
GTACATGCATTTTTTTTTTTCATCTTGCTTTTTTCTTTTCCATATTCATCTATCTTTTAAATTTCTTTGAA  
TCTACTTTTTTCTCCCTCGCTCCCTTCTCTATCCTCCATCTCTATCTTTGTCTATTTATTAATTTCTTTTCT  
TCTTTTTTCTCCAGACTTGGATATTTCTCTATCCTCTCATCTCTCTTTTCTATACATTTCTCTGACTTGT  
AGGTCTTAAGATTCTCATATTCTAAAATTAACCTCTGCTTAACAGGGTATGTTTATAAACCATTGGACT  
GAGGAGGAATTGCCAAGTTATCAAAGACATCCTATCAGGAATGTCAGCCTTTTACTCTCATTCATGCTC  
AGAGAAACAGTGCTGCAGGGATTATAGCCTGGAATATGGCAGAACAGATTTTAAATTTGTTTGCCTTT  
GCCTCCTAATATCCATTTTCCCTAAGTTTAACTGGGCATATTTCCAGTTTGCCTTGCAAATGTGTTGC  
CATATGACTGCACCTTTGTCTAATAAAATGAACTGAGTA

# RNA

>LINC01478  
GCACUUUUCUUUGUGCAUUCACACGAUGCAUUUUCUUUUCUUUUAUCACCAAACUGUUUUGAAAGAUAAAAG  
UACUUCUGAAUAUGUGGAUGGUGAGCCACGUGAAUGGAAGACAUGGAGAUUAGGACUGUUAACACCUUG  
UCAAAACAUUUAUUGUCCCUUCCACCUUUAACUUUGUGAUAAUAGGUGAACAGGACCCACGUGGUGCAG  
AAUACUGCGAUACACACUGCGGAUAAUUCAGUGCAGAAACAACACGUGGAUUGCUGAUACAACUUGUUC  
AUCACUUCUCCUGUUAUGAAGAAUUAUGGAAUUAUUCUGAGCUGCUUCCUCCUCCGCCCAAGGAG  
UCAUCUCUGUGUGAAAGGCCAAGCUUAUAAAUCCUGAAGAAAGAGACAUUAUACAAAUGCAAGCUGUUGU  
CACAACAAUGAUAAAGAAAUACAGGAGUCGAAAGAUUGGAGUAAGGGGGAAUUCAGAGAAACCACAAAAC  
ACAAAUAUGGAAACAGAGACAGGAGAAGAUUGCUAUGACAAAUAUGCAGAAGGUGAAAUUUUGGCAGCC  
UCUUAUUUCUUGGAGAAUAUGAUUUGUCAGGCUGAGGUGGAAGAAUACAUUGGUCAUACUGUUGAAGA  
GGUCUUGAAACAUUGGGCUUUCUUAACAAGCGGAAGGAUAGCACUGGCAGCCAUCCACUGGCCAGCAA  
UAUCCUGGAUUGAGACGAUAUCAUUGCAUUAUUGCUGAAUGAAACAUAGUGAAAUGACUGCAGAUAA  
CCUCAACUAAGUCCAAGAUUAUCAUUUCAAUUCUGGACCAGCCCUUGCCAUCUAGACUGAACAGAGAUUC  
CAGUUUCCAGGAGAGUAGAUUGGAGUAAUGAUAAAAGCACCUCUCCAAAACUUUUGCCUUGGUACUACAGAG  
UGGCACAUAAACUAAACAUUAUCAAGGAUUUUACAGCCCUAGGCCUUCUAUUACUGUGUAUUACAGUCUG  
CUGUAAUCAUUCUAAUUGGUCUAAAGAUUGCAAGUAAUUUACUCACGGCCUGAACACCAGAAGUGCCAAA  
AUUGCCUGGGAGUUUAUUCUGCAUCCAAACAGUACCAGGAAGGAGGAUGUAUUACUUCUGUUUCUCUA  
CAAGUGUCAGUGCAAAUCCAGCCAUCAAAACAAAACUUAGACCUAAAAGCUUUUAGAUUACAGCGAUUAUU  
GCAGAUUUUACAUGAGAUAAAAUUGUAAUUGCUCAUJUCCUUUAUUUUUUUUUUUUUUUUUUUUUUUUUU  
CACUGUAUAUUUUAGAUUGUCCUGCUUGACUGCCAGGUCAGACCCAGCACACAAAGAUUACUGUCAUAAG  
ACUGGGGAGCUGCAGUGUUUUUUUUUUUUUUUUUUUUUUUUUUUUUUUUUUUUUUUUUUUUUUUUUUUUUU  
AAACUUCCAUGGUCAUUUUUUUUUUUUUUUUUUUUUUUUUUUUUUUUUUUUUUUUUUUUUUUUUUUUUUUU  
AUAAUUAUCCAGCCAUGUGGAUAGUGACAGAGAAUUGAGUAAAGCAGCAUUAUUAUUAUUAUUAUUAUUA  
GUACAUGCAUUUUUUUUUUUUUUUUUUUUUUUUUUUUUUUUUUUUUUUUUUUUUUUUUUUUUUUUUUUUUU  
UCUACUUUUUUUUUUUUUUUUUUUUUUUUUUUUUUUUUUUUUUUUUUUUUUUUUUUUUUUUUUUUUUUUUU  
UCUUUUUUUUUUUUUUUUUUUUUUUUUUUUUUUUUUUUUUUUUUUUUUUUUUUUUUUUUUUUUUUUUUUU  
AGGUCCUAAGAUUCUAUAUUUUUUUUUUUUUUUUUUUUUUUUUUUUUUUUUUUUUUUUUUUUUUUUUUUU  
GAGGAGGAAUUGCCCAAGUUAUCAAAAGACAUCUUAUCAGGAUUGUCAGCCUUUUUACUCUCAUUCUAGCUC  
AGAGAAACAGUGCUGCAGGGAUUAUAGCCUGGAUUAUGGCAGAACAGAUUUUUUUUUUUUUUUUUUUUUUU

GCCUCCUAAUAUCCAUUUUCCCCUAAGUUUAAACUGGGCAUAUUUCCAGUUUGCCUUGCAA AUGUGUUGC  
CAUAUGACUGCACUUUGUCUAAUAAAAUGAAACUGAGUA

>NR\_033983.1 Homo sapiens long intergenic non-protein coding RNA 1538 (LINC01538), long non-coding RNA  
GGGATGCCCCGAGGCCTGGACTGATCCACCAGGAGAACTTCAGTGCATCATGGGTCCTGCTATTGCTCA  
TCCTCTTCCCTGGAAATGTGCGGTTTACAGGATGGTAAACATCTTTCCCTGGAACAGAGCCTTGAGGAT  
GCTATGGTGCAGTATGATGACCACCATCCCAGTCTGCCAAGGAATGAGTAACCTTCCCTGCAATTTAGGACT  
TTCGGCCCTAAAACAGTACAGTCTTGACACACTAAGATTGTTGGTCACCCTAGAAGAATGGAGATCTG  
GCGGCTACCACTCACATATACTCGTAGAACATTGATTGCAAGGTAACCTTACTGGCTGAAGCAGGTGATGC  
ATTGCTTCGGTGGGGCTGATGTGCGAAAACCTTCAGCTTCCCAAGACAACACTGATCAGGCCTCCAGGAGC  
ATTTCTCCTGCTCAGTGTACAGTGCCACTGCAGAGCGCAATTCCCTGGGGCAGCTCGGACATTCAGTAAA  
TACGTTTATTGAATGAATAAAACATAACACAGTAAGTAATTCATCTTAAAGTCAACCATTTACATTACTT  
TTTATCCCTGAATACCCTTCTCTACCTGTCAATTCAGCAGTCCAAGGGAAAAACCAGCTTGGTCAACAT  
TAAATTTGGAGCTCCACATCATATATTTTCATAGAACTAAACTAAGACATAGTTTAAAGAGAAAATGTT  
TCACTCCTCACGTGACCATGTTCTCTTTGGACTGGCTTTTCCCTTCCATTCATATCTCTAAGTCCAGT  
TTATCCTTTGAGTCTGACTCACTCAAGCTTCTCCCACTTCTCTTCCCTTGACCCTTGTAAAGTGTTCG  
ACCAGTAGTCTAGAAGTATAAAGGCATACACCTCATTATCACTACACACTGTTTCATAGGTAAGTCTTAA  
TTTCAAATTAGTTCCCTAACTCCTTGTTGACAAAGCTATGACCAAGACGTCATCCTCCTTTAGGGTCTA  
AAACAGTACTGTGCATGTGAGAGGCATTCAATTATATGCTTGTGAATTGACCAGAATAAATGACCGAATTG  
AAGTCTGATTTTGGTCAATTCACCAGACAAAGGGCCACAGAAGCATTCATCCTTTTCATGACAGAATTAG  
GGCATGATTCCATTTCTATATGAAATACTAGCTGTGTGTTGTTATTTAAATTTATTTTCTGGCCCCACTGA  
GAGTTGAAAGAAAAGTTGAAATTTAAAGGATTCCCTTCTATTCATCATTTTTTAAGAAATTTTCAATTTTAGT  
TATGAGGCAGTGAAGGCATATTACCATTTTATTTGGACACTTATTTTAGACCAGATTGCAAATTTTCTGT  
TAATTGAGTGCTGAATTGGCCAACACACCATTTGTAGATGTACTCCATAGCTTCTGCACATGGAATTTATT  
ACAGACTTTTCATCCACATCTGCTCCTTTACTTTGCTTAAATATACTATAGTATTTTCTTCTAGATACAGGG  
GAAGACAAAGAATATCAAAATGACAAGTGAAGAAAAAATTAACCTTAGAATTATTACAGCTTAAATTTGATCT  
ATACTCAGGTATCTAATAAAAAATATTAATAAACTATGTATCTTTTTTGTGTCTGTTATATACTTTCC  
ATGTTTCTCATTACACAAATACACATTTAGAAAAGCTGAAAATATGTAGATGAGCAAATACGAGGTTACCT  
AAAACTCTATCATCCAGAGATGATAACTATTGACATTCTGCTATATATACTTCTAAACATTTTCTTGTA  
AACATAATTTTAAATAGATTATATTCGTATTTTGGAGGAAAATATTTTTCAGTTAAACAAGTTGCTATTT  
CAAAATTAACACTGTAAATTCCTTTCTATGACAGTAAATACACATGTATATTTTCATGTGAAATAGTTGTA  
GCAACTTTTACTGTATAAAACCCATGTAACATATTTAGCAAATCAATACATATTTGTAGGAAACTTAGTTTC  
CAATTTTCAATATGTTAAAAATTTTGACAAGAAATATTTTGTGTAAACATTTTATAAGTATATAATGCTT  
CCTGAGGATAAATCTAAAAAGAGGTCTTACTAAGTCAATATATATTTTTCCTATAATTTTGACATGAT  
TTGCGAATTTGCCCTTCAAAAACTTATACCCATTTTACTCTGTTTCACCTTCTTAAAAAGTACTAGT  
TATCATCCTTCACTTTTCATGTTTGAATCGGTTAGGTGAAAAATAGCATTTCATTTTACTATTTTTTAT  
TATTTTCAACTACTGTTGAGGTTAAATATCTTTCTATGTGGTTTTGGGCCAATTTTATTTTCTACTAGA  
ATGATAATCTTTTATTGGTTTTTCAGACTATTACCTATATTCCTGAGTCTGACATATCAAAGTTTTTAAT  
CCAATAAATAAAATATCATTTTAATAAAAAAAAAAAAAA

RNA

>LINC01538

GGGAUGCCCCGAGGCCUGGACUGAUCCACCAGGAGAACUUCAGUGCAUCAUGGGUCCUGCUAUUUGCUCU  
UCCUCUCCCCUGGAAAUGUGCGGUUUCACAGGAUGGUAACAUUUUCCUGGAACAGAGCCUUGAGGAU  
GCUAUGGUGCAGUAUGAUGACCACCAUCCAGUCUGCCAAGGAAUGAGUAACUUCUGCAAUUUAGGACU  
UUCGGCCCUAAAAACAGUACAGUCCUGGACACACUAAGAUUGUUGGUCACCCUAGAAGAAUGGAGAUUCG  
GCGGCUACCACUCACAUUAUCUGUAGAACAUUGAUUGCAAGGUAACUUCUGGCUGAAGCAGGUGAUGC  
AUUGCUCUGGUGGGGUGAUGUCGAAAAACUUCAGCUUCCCAAGACAACACUGAUCAGGCCUCCAGGAGC  
AUUUCUCCUGCUCAGUGUCACAGUGCCACUGCAGAGCGCAAUUCUGGGGCACGUCGGACAUUCAGUAAA  
UACGUUUUAUUGAAUGAAUAAAAUAAACACAGUAAGUAUUCAUCUUAAGUCAACCAUUUACAUAUCUU  
UUUAUCCCUAGAAUACCCUUCUUCUACCGUGUCAAUUCAGCAGUCCAAGGGAAAAACCAGCUUGGUCAACAU  
UAAAUUUGGAGCUCCCAUCAUAUAUUUUAUAGAACUAAACUAAGACAUAGUUUAAAGAGAAAAUGUU  
UCACUCCUCACGUGACCAUGUUCUUCUUGGACUGGCUUUUCCCUUCCAUUCUUAAGUCCAGU  
UUAUCCUUUGAGUCCUGACUCACUCAAGCUUCUCCCAUUCUCCUUGACCACUUGUUAAGUGUUUGC  
ACCAGUAGUCUAGAAGUAUAAAGGCAUACCCUCAUUAUCACUACACACUGUUUAUAGGUAAGUCUUAA  
UUUCAAAUUGAUUCCUAAACUCCUUGUUGACAAUGACUAUGACCAAGACGUAUCCUCCUUUAGGGUCUA  
AAACAGUACUGUGCAUGUCAGAGGCAUUCAUUAUAUGCUUGUGAAUUGACCAGAAUAAUAGCCGAUUG  
AAGUCUGAUUUUGGUCAAUUCACCAGACAAAGGGCCACAGAAGCAUUGCAUCCUUUUAUGACAGAAUUG  
GGCAUGAUUCCAUUUCUAUAUGAAAUACUAGCUGUGUGUUUAUUAAAAUUAUUUUCUGGCCCCACUGA  
GAGUUGAAAGAAAAGUUGAAAUUUAAGGAUUCUUUAUUAUUAUUAUUAAGAAUUUAUUUUUAGU  
UAUAGGCAGUGUAAGGCAUAUUACCAUUUUUAUUGGACACUUAUUUAGACCAGAUUUUUAUUUUCUGU  
UAAUUGAGUGCUGAAUUGGCCAACACACCAUUGUAGAUGUACUCCAUAGCUUCUGCACAUUGGAAUUUAUU  
ACAGACUUUUCAUCCACAUCUGCUCCUUUAUUUGCUUAUAUUAUUAUAGUAUUUCUUAGAUACAGGG  
GAAGACAAAGAAUAUCAAUUGACAAGUGAAGAAAAUUAACTUAGAAUUAUUCACAGUUAUUUUGUAUCU  
AUACUCAGGUUAUCUAAUAAAAUUAUUAAUAAACUAUGUAUCUUUUUUGUUGUCCUGUUAUAUACUUCC  
AUGUUUCUCAUUAACAAAAUACACAUUUAAGAAAGCUGAAAAUUAUGUAGAUGAGCAAUACGAGGUUACCU

AAAAUCCUAUCAUCCAGAGAUGAUAACTAUUGACAUUCUGCUAUUAUACUUCUAAACAUUUUCUUGUAA  
AACAUAAUUUUUAAAUAGAUUAUAUUCGUUUUUUGAGGAAAAUAUUUUUCAGUUAACAAGUUGCUAUUU  
CAAAAUUAAACACUGUAAAUCCUUUCUAUGACAGUAAAUACACAUGUAUAUUUCAUGUGAAAUAGUUGUA  
GCAACUUUUACUGUAUAAAACCAUGUAACAUAUUUAGCAAUCAAUACAUAUUGUAGGAAACUUAGUUUC  
CAAUUUUCAAUAUGUUAAAAUUUUGACAAGAAUAUUUUUGUGUAAACAUUUUUUAUAAGUAUAUAAUGCUU  
CCUGAGGAUAAAUTCUAAAAAGAGGUCUUACUAAGUCAAUUAUAUUUUUUCCUAUAAUUUUUGACAUGAU  
UUGCGAAUUUGCCCUUCAAAAAACUUAUACCCAUUUUAUACUCUGUUUCACCCUCCUAAAAAGUACUAGU  
UAUCAUCCUUCACUUUUCAUGUUUAGAAUCGGUUAGGUGAAAAAUAGCAUUUCCAUUUACUAUUUUUUUAU  
UAUUUUCAACUACUGUUGAGGUUAAAUAUCUUUCUAUGUGGUUUUUGGGCCAAUUUUUAUUUUUCUACUAGA  
AUGAUAAUCUUUUAUUGGUUUUUUCAGACUAUUACCUAUUAUUCUGAGUCUGACAUAUCAAGUUUUUAU  
CCAAUAAAUAAAAUAUCAUUUAAUAAAAAAAAAAAAA



>NR\_040025.1 Homo sapiens long intergenic non-protein coding RNA 1539 (LINC01539), transcript variant 1, long non-coding RNA  
ATAGATGAATAGAATGAGCAAAAGTTGCAGCACAGCGTGTCAACCAGAGAGGAAAAGAATATCCTTGCTGT  
GCCAAGAAAAGAAAAGACCATGGATCTACTAGTTGCAGATTTTCAGCAGTAATGCCAAGGGGGCAAGAAGTG  
ACCAGCAGAACAAATTAGGCCATGGCAACAGAAGCCAACTACAACCCATGTTCCAATCTATGACCTCCCTC  
TCCTGCTGGTACAAGGATATGAATGTGGCTGTAGCATCATTTTTTGGAAAGCCAGAAATGGTAATACTGAAAA  
TCACTGCTTGTCTCAAGATCCAACCTTCTGGAAATCTCAACCATTCTGAATACAGCCATCATTTCTTAAAAAT  
TGAAGAGAACTGTTTTTACAAGATCTTGACTTGTAAAGAAAACCAAGTTTATTAAGGGCAAGAGCTGATAAT  
CAACTGACTAATGAGGATTGACTTCTACAATTGATGAGCATGGAATTGGATGTGCCATAATCAACAGAAG  
AGGGATTTTGATGTCTACACTGTAGCCCCAGAAGACAGAACGCTCAAAGGTGTCAATGGGCAGAATTT  
GTAGATGACATACAGCATCCAATGGATTACTCCTATTTCAGGATAATGGAAGAAAAAGGTTCTTACCCTTC  
AGCAGATAGCATGCTGAGCCCTGAACAAATTTTATGACTTCTGGTGCAAAGCAGACCCAGTCAGCTTGCC  
TCTAGCAACTGGTTAATACTACTCCAAGGAAACCACACTTAAAATTTCTTGGAAAGTTCTTTTACCATCACA  
TCAAGTTGCATTTTGAAGCTGAAGCCCTTCGAATCCATTTATACCTTGTGATATTCCTTGGCAGATTGT  
TGTTTTGTTTTGCTAGACATGATTTTAGGATTTTGTCAAGGAAGCCATCTATGACCCCAATCAATCAAAAC  
CATAAGGATCAAGGCTGGAAGAACCTATTCCTTAGAGCAAAGGATGCAATGTCAAGCAAGTTGTGATACC  
TCAACTATCTACAATTTAACCACCAAGGAAAGAACACTGTTTTGGAGAAATGAGAAAGATTATCATCAGTGT  
CTTTTCAGAAAGTCATCAAAAAGAGAAAAGGAGAAAAGAGAGGAGAAAAGCAGAAAGATCTGGAGTCTGGGAA  
GTTCAAGAGCATGGCACCAACATCTGGCAAGGGCTTTCATTCTGCATCATCTCATGGAGGAAAAATAAAAA  
GATTTTCAGGTAAATCCAGATTTGGAGCTTAAATGACTCAAATGCTTTGCCTACATTGATCCTACATTTCAG  
GCTGCTTACATATCTCTTGGCTTCTCTGAGAACCAGATTGTCAACCACTTAAAGTGTCTTCCAGAGTCCCT  
ACGAGTATCAGAGAAGGCATAATCTGTACACGTGGCTTCATTTAAAATGAAAATATCAAGCAGTGTCTATT  
TTCACAAGTATCCCCACACTGTCTGAGGCTGAAAAGAAAGAGTGTAGCTATGCACATGTCAGTGAGAGAA  
AATTTTCAGCTCAATTGGAGGATGTAAAGATTGAAATACCACCTGCTCCTAGTTCTGATGCAAAATTTGAAA  
GAGTGCACCTGGGCTCTTCAAATGGCATATTGACAAGGAGAAAGAGGAAAGGATGCCCCAGGACAGCCTGGG  
GGTCAAGGCTGGGCTCAGGCATGCCTGGACAAGCCATGCAAGTTGTCTCCGGACTTGAACCACGTATCAG  
AGGAGCTATTTGAGGAGCCACATCAGCATACCTGCTTCTGTGGGCCCCCAGGCTGTGGTGCTCAGCCCTT  
GCACTATGAAACATTTTTTTTTTCCAGAAGCCAAAGCTTTGAGCATCTCCTCCCATGTAGAGAGTGTATA  
TGTTTACGTCCATGTCTTTCGCCATGTGAACGCATGCAACCACCACCTCAAATATCATAAATCCTCTCTC  
TCCCCCTTTCTGTCTGCCTGTTTATCTACAATCTGTCTATTTAAATTTCTTTTTTAAACAAGAAGGGAATAT  
CTTTATGCCTGTTTGTAGGGATATTCTACATCCATCTGTTATTTACATCATTCGTTTTTCTGAGGTGTCT  
CCAACAAATCCTGGCTGGATGCACTGTATGTGTTATTAATAAAACAGCTGTAAAAATATTAAAC

RNA

>LINC01539

AUAGAUGAAUAGAAUGAGCAAAAGUUGCAGCACAGCGUGUCACCAGAGAGGAAAAGAAUAUCCUUGCUGU  
GCCAAGAAAAGAAAAGACCAUGGAUCUACUAGUUGCAGAUUUCAGCAGUAAUGCCAAGGGGGCAAGAAGUG  
ACCAGCAGAACAAUUAAGGCCAUGGCAACAGAAGCCAAACUACAACCCAUGUCCAAUCUAUGACCUCUCCUC  
UCCUGCUGGUACAAGGAUAUAGAAUGUGGCUGUAGCAUCAUUUUUGGAAGCCAGAAUGGUAUACUGAAAA  
UCACUGCUGUCUCAAGAUCCAACUUCUGGAAUUCUAACCAUUCUGAAUACAGCCAUCAUUCUAAAAU  
UGAAGGAGAACUGUUUACAAGAUUCUUGACUUGUAAAGAAACCAAGUUUUAUUAAGGGCAAGAGCUGAAU  
CAACUGACUAAUGAGGAUUGACUUCUACAUAUGAGCAUGGAAUUGGAUUGGCCUAAAUCAACAGAAG  
AGGGAUUUUGAUGUCAUCACACUGUAGCCCCAGAAGACAGAACGCUCAAGGUGUCAUUGGGCAGAAUUU  
GUAGAUGACAUAACAGCAUCCAAUGGAUUAUCCUAUUCAGGAUAAUGGAAGAAAAAGGUUCUUAACCUUC  
AGCAGAUAGCAUGCUGAGCCUGAAACAAAUUUUAUGACUUCUGGUGCAAAGCAGACCCAGUCAGCUUGCC  
UCUAGCAACUGGUUAAUACUACUCCAAGGAAACCACACUAAAAUUCUUGGAAGUUCUUUUAACCAUCACA  
UCAAGUUGCAUUUUGAAGCUGAAGCCUUCGAAUCCAUUUAUACCUUGUGAUUAUCCCUUGCCAGAUUGU  
UGUUUUGUUUGCUAGACAUGAUUUUAGGAUUUUGUCAAGGAAGCCAUCUAUGACCCCAUUAUCAAUCAAAC  
CAUAAGGAUCAAGGCUGGAAGAACCUAUUCUUAAGAGCAAAGGAUGCAAUGUCAAGCAAGUUGUGAUACC  
UCAACUAUCUACAUAUUUAACACCAAGGAAAGAACACUGUUUGGAGAAUAGAGAAAGAUUAUCAUCAGUGU  
CUUUUCAGAAGUCAUCAAAAAGAGAAAAGGAGAAAAGAGAGGAGAAAGCAGAAAGAUUCUGGAGUCUGGGAA  
GUUCAAGAGCAUGGCACCAACAUCUGGCAAGGGCUUUCAUUCUGCAUCAUCUCAUGGAGGAAAAUAAAAA  
GAUUUCAGGUAAAUCCAGAUUUGGAGCUUAAAUGACUCAAUUGCUUUGCCUACAUUGAUCCUACAUUCAG  
GCUGCUUACAUAUCUCUUGGCUUCUCUGAGAACCAGAUUGUCACCACUUAAGUGUCUUCAGAGUCCUC  
ACGAGUAUCAGAGAAGGCAUAAUCUGUACACGUGGCUUCAUUUAAAAUGAAAAUAUCAAGCAGUGUCAUU  
UUCACAAGUAUCCCCACACUGUCUGAGGCUGAAAAGAGAGUGUAGCUAUGCACACUGCAGUGAGAAGAA  
AAUUUCAGCUCAAUUGGAGGAUGUAAAGAUUGAAAUACCACUGCUCCUAGUUCUGAUGCAAAAUUGAAAA  
GAGUACACUGGGUCUUCAAUUGGCAUAUUGACAAGGAGAAAGAGGAAAGGAUGCCCCAGGACAGCUGGGG  
GGUCAAGGCUGGGCUCAGGCAUGCCUGGACAAGCCAUAGCAAGUUGUCUCCGGACUUGAACCAGUAUCAG  
AGGAGCUAUUUUGAGGAGCCACAUCAGCAUACCUGCUUCUGUGGGCCCCCAGGCUGUGGUGCUCAGCCCUU  
GCACUAUGAAAACAUUUUUUUUUUCCAGAAGCCAAAGCUUUGAGCAUUCUCCUCCCAUGUAGAGAGUGUAUA  
UGUUUACGUCCAUGUCUUUCGCCAUGUGAACGCAUGCAACCACCACCUCAAUAUCAUAAAUCCUCUCUC  
UCCCCCUUUCUGUCUGCCUGUUUAUCUACAACUCUGUCUAUUUAAAUUCUUUUUAAACAAGAAGGGAUAU  
CUUUUAGCCUGUUUGUAGGGAUAUUCUACAUCCAUCUGUUUAUUACAUCAUUCGUUUUCCUGAGGUGUCU

CCAACAAAUCCUGGCUGGAUGCACUGUAUGUGUUAUUAUAAAACAGCUGUAAAAUAUUAAC

>NR\_038325.1 Homo sapiens long intergenic non-protein coding RNA 1541 (LINC01541), transcript variant 1, long non-coding RNA  
ACAGAAAGAGCCAGGATCCCAGACTGTGCTGAAGCTTCATGAGACCTCTCCTCGTCTGTGCACGAAAGAG  
GAGCCGGACACAGAGTGTCCAGCCGACTCTGGAGCCCAGGCTGTTGCTTCCCGGTCTGGTGGTGAATCCCT  
CCATTGTCTGATGTGGGTAAGTCCAAGACCAAGGAGCCAGCAGATTGAGAGTCCAGGGAGGGCTGTTCCCT  
GATTTGCAGATGGCGCCTTCTCTTTATGTCTTCAACAAGATTGTGAAGCCTGTAGCTTGGAAAGATACAGGA  
CATAGGTGAAAGTGTGTTGTACCATTCATTTAAAGGCATAAAATGTCCAATGGGTGCATAAAGGTCAAAGCTA  
ATAGACAAAAAAGCTTCCAGCATGGATGATGAGCAAATTAGATGCCCTCTCTGCTCAGCATGAGGTTTTT  
TCAGCTGCAAAAAGTAAAAATGAATCAACCATGGAATTACCCCAATGCACATAAGCTACCGCTGTAGTGGT  
AGATCGTTATATATCTGGGCAATTAAATTTTAAATGCTAACTGTGAGACCAAGTCAGCAAATTTCTAATTG  
AGACACGTTCTACAAAAACACCTGACCACTACTCCTGAAACAGTCAAGGTCTTCAGAAATAAAGAAGGTTT  
AAAAAAATTATTACAGTCAAGATACACGGCAACTAAATGTGATGTGGTATACCGTATGGGATACAGAAAC  
TGAAAAAGGACATTAGGGCCATCTTGTGATACATGCACGTGTACAGGAAAAGTTTCCAGGAAAAGTCAAG  
CCAGGGCTTCACAGAAGATCAAAAGAAAGAGACAAGGAGAAGCTAAGTGTATTAGTCAGGATTCTCTAAG  
GGACAGAACTAATAGAATATATATACACACACAAACACACACACACATATATATACATATAAATAA  
AAGGGAGTTTATTAAAGGAGTATTAACCTCACACAATCACAAAGTCCCACAACAGGCCGGGCCATCTGTAAG  
CTGAGGAACAAGGAAGCCAGTCTGAATCCCAGATGACAACTTGGAGTTCAATGTTCAAGGGCAGGAA  
GCATCCAGCACAGGAGATAGATGTAGGCTGGGAGGCTAAGCCAGTCAAGACTTTTTCACGTTTTTCTGCCT  
GTTTCATATCCTAGCTGCAATGGCAGCTGATTAGATGGTGCCCAACCAGATTAAGGGTGGGTCTGCCTTT  
CCCAGCACACTGACTCAAATGTTTATCTCCTTTGGCAACACCCCTCACAGACACACTCAGGATTAATATTT  
TGCTTCCTTCCATCCAATCAAGTTGACACTCAGTATTAACCATCACACTAAGCTTGTTATTTTATAGAAA  
TGCTTGAAAACAGAGATAAATGCAGCTACAAATGAACGATGACTCTGCGTTTTCTTGTATATATAAG  
ATCAACAATAACACTTAGGTCATGAAACCCACCTACTTTACAGATCATTTATGGAAAATAACACTGCCTTC  
AGCAATGGAGAAACAATCATCCATATTTATGCAAGAACTAAATTCAGTTTGAAGCTTGCCTTTGAGCTT  
GAAGATATAAAACATGATTCTGTGACAGTAAACAAATGTATAACAAATCTTACAGAAATTTATGTGATTAC  
TAAAAAATAATCAATTCATCAATTCATAAACTGAGTACCGTATTACTTTTTCTATTGCTTCTTTACCAA  
TAAATACAAGCTTTGCAGTTTAAAAACAACAGAAATTTAATTTTTTATAGTTCTGAGGGTCAGTAACCTAA  
AACTGATCTTATGAAAATAAGTTAAATCTTGGGGATATGGGTGTGGACAGGGCTGGTTTTCTTGGGGCT  
CTGATGGTAAATTTGCTTCCTTGCTTTTCTCCTTCTAGGGAGCCTGCATTCCCTGCCTCCTAGTGGCT  
TCCTCCCATCACTCGAACCTCTGTTTCCAGCCTCAGGATTCCTAATGTGACTCTGACGTTTCATCTCCTG  
TTTATGAGGACGCTTCTGATTGCTAAGATACATACGGTGACACTATGGAAGTTAAGTTGAAGATTAAGAAC  
CCTGAAAAATAGAAAGAATCTTCTATGGTATATCACAGAGATTACAAGGGCCTGAATTAGAGTGGTGACA  
TTTTTCATCCCTTGATAATGGATTAAAAACAATGAATGAAGCTTTGGGGTGAACTTACAGGACTTTATGG  
CAAACCTTCATATGGGAGACTTACATGAAGGGAGGAAGAAATGCGTATGTGTACAAAATCATGTGGATAGA  
TGTGCATTTGTGGGTATCTGTGAATACAAATACACAATTTTCAGACAGAAGTAGTATAAGAAAAGGAAAT  
CAAAACAAGTCAAAATTTTAAAGTGTAGCTCTTGGTGCACTTTAAAAAATTTATTAATTTGAAGCTGTAGT  
TTATTCTCATCATTTGTCTATATATAGTGAATTTTCTTTAGCTTTTGAATTTAAATTCATAATATTACA  
ATTCTGAATTCCTATGTATGTATATGTTAAGAATCCTTTAAATGGGACTGACTTTTCATATGTGTGTGGCTG  
CATTCTGAAATAGTTGTCTAGTTGATACATAAAGCAGTGAGTGCTATTTGTGAAGATATATTTATATTTAA  
AGTCTTCATACAGTTATTAAGTCTCAATATTTACTGAAATGATTTCTCCAAATATCCTATATTTAATT  
ATCATGCTGGCAAATTTATTATAACTTTGGTTTGAAAAAATATATTATGATACATATCCACTGACTAATG  
CCACCTATCTGCTTTTCTGAATTCAAAGTTTATGATTATTTCCATAAATGTATTTATCAGTATAATCAAA  
AATAAAAAATAACATAAAATAAAATTTCTGTGAGCTTTACACATCTAATGTGCAATGATTATAAATCTGGTC  
TTATACACATGGTAAAAAACATTTAAGTCACAAAAGTATACTTCAGGTTTAAAGTATAAATCTGAAATTA  
ATTCTCAGATTTAAGTATAATTTTTTAAAGCTTTGGTAATTGTGTCCCTACTGTTAATTTATTTGTATAG  
TTTTCACTATATCATCTGACCTTTAATGTTTCTAGAACTTGTGTGAGGTCTCATACTTCATGGCTAAT  
AAAGTATTTATTTTTCTATTCTTAAAAAATAAAAAAAAAAAAAA

RNA

>LINC01541

ACAGAAAGAGCCAGGAUCCCAGACUGUGCUGAAGCUUCAUGAGACCUCUCCUCGUCUGUGCACGAAAGAG  
GAGCCGGACACAGAGUGUCCAGCCGACUCUGGAGCCCAGGCUUGUUCUCCCGUCUGGUGGUGAGUCCU  
CCAUUGUCUGAUGUGGGUAAAGUCCAAGACCAAGGAGCCAGCAGAUUCAGAGUCCAGGGAGGGCUGUUCU  
GAUUUGCAGAUUGGCGCCUUCUCUUUAUGUCUUCACAAGAUUGUGAAGCCUGUAGCUUGGAAGAUACAGGA  
CAUAGGUGAAAAGUGUUUGUACCAUUCAUUUAAGGCAUAAUUGUCCAAUGGGUCAAUAAAGGUCAAAGCUA  
AUAGACAAAAAAGCUUCCAGCAUGGAUGAUGAGCAAAUUGAUGGCCUCUCUGCUCAGCAUGAGGUUUUU  
UCAGCUGCAAAAGUAAAAUGAAUCAACCAUGGAAUUAACCCAAUGCACUAUAGCUAACCGCUGUAGUGGU  
AGAUCGUUAUUAUCUGGGCAAUUAUUUUUAUUGCUAACUGUGAGACCAAGUCAGCAAAUUCUAUUUG  
AGACAGUUCUACAAAAACCCUGACCACUACUCCUGAAACAGUCAAGGUCUUCAGAAAUAAGAAGGUUU  
AAAAAAAUUAUACAGUCAAGAUACACGGCAACUAAAUGUGAUGUGGUUAUACCGUAUGGGAUACAGAAAC  
UGAAAAAGGACAUUAGGGCCAUCUUGUGAUACAUGCACUGUCACAGGAAAAGUUUCCAGGAAAAGUCAAG  
CCAGGGCUUCACAGAAGAUCAAAAAGAAAGAGACAAGGAGAAGCUAAGUGUAUUAGUCAGGAUUCUCUAAG  
GGACAGAACUAAUAGAAUUAUUAUACACACACAAACACACACACACAUUAUUAUACAUUAUUAAUAA  
AAGGGAGUUUAUUAAGGAGUAUUAACUCACACAAUCACAAGGUCCCACAACAGGCCGGGCCAUCUGUAAG

CUGAGGAACAAGGAAGCCAGUCUGAAUCCCAAAGAUGACAAACUUGGAGUUCAAUGUUC AAGGGCAGGAA  
GCAUCCAGCACAGGAGAUAGAUGUAGGCUGGGAGGCCUAAGCCAGUCAAGACUJUUCACGUUUUUCUGCCU  
GUUUCAUAUCCUAGCUGCAAUGGCAGCUGAUUAGAUGGUGCCCACCCAGAUUAAGGGUGGGUCUGCCUUU  
CCCAGCACACUGACUCAAUUGUUUAUCUCCUUUGGCAACACCCUCACAGACACACUCAGGAUUAUAUUU  
UGC UUCCUUCUCCAUCCAAUCAAGUUGACACUCAGUAUUAAACCAUCACACUAAGCUUGUUUAUUUAUAGAAA  
UGCUUGAAAAACCAGAGAUAAAUGCAGCUACAAUGAACGAUGACUCUGCGUUUUCCUUGUAUAUAUAAAAG  
AUCAACAAUAACACUUAGGUCAUGAAACCCACCUACUUUACAGAUCAUUUAUGGAAAUAAUACACUGCUUC  
AGCAAUGGAGAAAACAAUCAUCCAUAUUUAUGCAAGAACUAAAUUCAAGUUUGAAAGCUUGCUUUAGAGCUU  
GAAGAUUAUUAAAACAUGAUUCUGUGACAGUAAACAAUGUAUAACAAAUUCUACAGAAAUUUAUGUGAUUAC  
UAAAAAAAAAUCAAUUCAUCAAUCAAUAAAACUGAGUACCGUAUUACUUUUUAUUGCUUCUUUACCAA  
UAAAUACAAGCUUUGCAGUUUAAAAACAACAGAAAUUUAAUUUUUAUAGUUCUGAGGGUCAGUAACCUA  
AACUGAUUCUUAUGAAAUAAGUUAAAUCUUGGGGAUAUGGGUGUGGACAGGGCUGGUUUCUUCUGGGGCU  
CUGAUGGUAAAAUUUGCUUCUUGCCUUUUUCCUUCUAGGGAGCCUGCAUCCCUGCCUCCUAGUGGCU  
UCCUCCCAUCACUCGAACCUUCUGUUUCCAGCCUCAGGAUUCUAAUGUGACUCUGACGUUUCUUCUCCUG  
UUUAUGAGGACGCUUCUGAUUGCUAAGAUACAUAACGGUGACACUAUGGAAGUUAACUUGAAGAUUAAAAAC  
CCUGAAAAAUAGAAAAGAAUCUUCUAUGGUUAUAUCACAGAGAUUACAAGGGCCUGAAUUAGAGUGGUGACA  
UUUUCAUCCCUUGAUAAUGGAUUAAAAACAAUUGAAUGAAGCUUUGGGGUGAACUUACAGGACUUUAUGG  
CAAACTUUAUAUGGGGAGACUUACAUGAAGGGGAGGAAGAAUUGCGUAUGUGUACAAAUAUGUGGAUAGA  
UGUGCAUUGUGGGUAUCUGUGAAUACAAAUACAAUJUUCAGACAGAAGUAGUAUAAGAAAAGGAAAU  
CAAACAAAGUCAAAAUUUUAAAGUGUAGCUUUGGUGCACUUUAAAAAAUUAUUAAAUGAAGCUGUAGU  
UUAUUCUCAUCAUUGUCAUCCUAUAUUAUGUGAUUUUCUUUAGCUUUUGAAAUAAAUCUAUAUAUACA  
AUUCUGAAUUCUUAUGUAUGUAUAUGUUAAAGAAUCCUUUAAUGGGACUGACUUUCAUAUGUGUGUGGCG  
CAUUCUGAAAUAGUUGUCUAGUUGAUACAUAAGCAGUGAGUGCUAUUUGUAAGAUUAUUUAUAUUAA  
AGUCUUAUACAGUUAUUAACUAGCUCCAAUAUUACUGAAAAUGAUUUUCUCCAAAUAUCCUAUAUUAAU  
AUCAUGCUGGCAAAUUUAUUAACUUUGGUUUGAAAAAAUUAUUUAUGAUACAUAUCCACUGACUAAUG  
CCACCUAUCUGCUUUUCUGAAUUCAAAGUUUAUGAUUAUUUCCAUAUAUGUAUUUAUCAGUAUAUAUCAA  
AAUAAAAAUAAUAUAUAUAAAAUUUCUGUGAGCUUUACACAUCUAAUGUGCAAUGAUUAUAUAUUCUGGUC  
UUUAUACAUGGUAAAAAAACAUUUAAGUCACAAAAGUAUACUUCAGGUUUAAGUAUAUAUUCUGAAAUAA  
AUUCUCAGAUUUAAGUAUAUAUUUUAAAAAGCUUUGGUAAUUGUGUCCCUACUGUUAAAUUUUAUUGUAUAG  
UUUUCACUAUAUCAUCUGACCUUUUAAGUUUCUAGAAACUUGUGUGAGGUCUCAUACUUC AUGGCUAU  
AAAGUAUUUAUUUUUCUAUUCUAAAAAAAAAAAAAAAAAAAAA

>NR\_110762.1 Homo sapiens long intergenic non-protein coding RNA 1543 (LINC01543), long non-coding RNA  
GAGCAGTTGGTTTCGTTGTCTTAATTTGGGGCAGTAATGATTTCTGAGAAGCAGGTGATTGATAACGCGC  
AAATTCAAAGCCCCCTGGGGGCTGCATTGTAGCATGGTGTGGGGATGGGGAGACAGAGGGCTGGTAGGAT  
CCCGAATTCCTAGTTTTTCTCTCCCTCTCCCTTGCTTCTTCATTTTCTTCCTTCAGGCTTTCTTCCATTT  
CTTTCTTCCATCAAATATTTGTGGAGCTGGAAGTGGGCTTCACTATCATATTTCCAAGGCCCTGTACTGGG  
AACAGACAAAGAAGCTCCTCCAGAGACTGGAAGAATGGTACAAGGTGTGAAAACCAAGGCTTAAAGCAT  
GCAAGTTATTTGCCCCGAGGTTTTTTCAGCCACAAATGAAGAAGCTGGGTCTGCTCCACACCTGTGAACCAG  
GCTATTTCCACCATAAACCCTGAACTCAGATGAGCACCAGCCCATGGAGAATAGTCCAGAAGGCTGCCCATA  
GCCTTAAAGGACAGTCAGCCTCACAAAAATGAGTGTTATATTCTGGATTATCAGAAGAGAAATGTGAGATG  
CAGGCAGGTTGAGAAAAATTGCTCCAAGTCACCTCGGGAATGTGTGCATGGACAAGGAAGCAGGAAGATCC  
CAAGGAAAAAGAAGCAGCATGAAAAATGACAAGAAGACTACAACAGAAGTTTCTACGAACTTTGCACACA  
CAGAAGAGGGTTCTTTTAGTTTTAGTCAGGATAGGAAAAGGACAAAATAAAAGTGAACATTTATTGAGCC

RNA

>LINC01543  
GAGCAGUUGGUUUCGUUGUCUUAUUUGGGGCAGUAAUGAUUUUCUGAGAAGCAGGUGAUUGAUAAACGCGC  
AAAUUCAAAAGCCCCUUGGGGGCUGCAUUGUAGCAUGGUGUGGGGAUGGGGAGACAGAGGGCUGGUAGGAU  
CCCGAAUUCUAGUUUUUCUCUCCCUUGCUUCUUCUUAUUUCUCCUUCAGGCUUUCUCCAUUU  
CUUUCUCCAUCAAAUAUUUGUGGAGCUGGAACUGGGCUUCACUAUCAUAUCCAAGGCCUGUACUGGG  
AACAGACAAAGAAGCUCUCCAGAGACUGGAAGAAUGGUACAAGGUGUGAAAACCAAGGCUAAAAGCAU  
GCAAGUUAUUUGCCCGAGGUUUUUCAGCCACAAAUGAAGAAGCUGGGUCUGCUCCACACCUGUGAACCAG  
GCUAUUUCCACCAUAACCUGAACUCAGAUGAGCACCAGCCCAUGGAGAAUAGUCCAGAAGGCUGCCCAUA  
GCCUAAAAGGACAGUCAGCCUCACAAAUGAGUGUUUAUUUCUGGAUUUUCAGAAGAGAAAUGUGAGAUG  
CAGGCAGGUUGAGAAAAUUGCUCCAAGUCACUUCGGGAUUGUGUGCAUGGACAAGGAAGCAGGAAGAUGC  
CAAGGAAAAAGAAGCAGCAUGAAAAAUGACAAGAAGACUACAACAGAAGUUUCUACGAACUUUGCACACA  
CAGAAGAGGGUUCUUUUAGUUUUAGUCAGGAUAGGAAAAGGACAAAUAAGUGAACAUUUUAUUGAGCC

>LINC01544

CCCAGGCCAAGCCCCUACCCUCCUGAGGGCAGCAUCCCUGGGUAUAGAUUCUCAGAAAUCUGCAGUUUUAAU  
ACAAAGGCCCCCUAAAACUAAAAGAAAACAGCCUGAAUUCACAUGGGCACACCUUACCUGAGCAGGCAAUAC  
AGUGACAAGGGUGGAAAACAGAGGGGACGAGACCUGACACUGGGAAGGCCUGACAGAGGGAAGGAAGGAAA  
GCUCUCAGGCUAAGGGCGCUGGGAACCCCAUCUUCUCCUUCUAGGGAGUUGCCGUUCCUGAGGGGCCUGA  
GGAGCCUCCUCCUGAAGCCCCAGCUAUUCAAUUAACCCUUUUUUAUUAGGACAUACAGGAGGUGUUGCC  
CCUUAGCUUUCCAUTUCUAAACUCCUCAUUGUAGGGGCCUUGCUGGUGUCGAGGACAGAGCGGAGGCCUCA  
AGGGUAUGUGCAGUCUAGGUGGCCUUGGUGGAGGGGCAGGAUUCUACAUUUGGGAGGGGACUUCUUGCUG  
AACUCCUUCAGAUUGGUCAAAUGGGGUAGACUGAGGGAGUGGUGUGGGAGGUGGUAAGAACCAAGUAG  
GGACUGGAUGGAUCCUGGGAGUUUACAGGGCUGCCUCCGAGAGGGGAGGGUGCUGAGAGAGAGGAGACCAG  
GGUGGGCACCAACGCGAUCCUUGCAGGCUAUGAGUGUAGGAUCAGAGAGGGUUAAGGGCCAGAAGCCCCU  
GUGUGUUUAGGACUGUGGCACCAUGGGUGCAUCCCCUGAGAAGCGAAGCUCAGGCAGGAGCAGCAGUGGG  
CAAAGAGCCUGGUGGUGCAGGUGCAGGCCCUUGUAGAGGAGGCAGUGACAACACCCAGCCCAGGCCGACUC  
UCUCUGCCUGUCCCUUGAGUCCCUUGGCACCUUCCACAUCUGCUCAGCCCUCCAGUUAACCUAGCACU  
GGUAGAUGGUTUGAUUAGAUUUGGAUCUGUGUCCCCAAAUCUCAUGUUGAAUUCUAAUCCCCAGUGUUGGA  
GGUGGGGCCUGGUGGGAGGUGAUUGGAUCAUGGGGGUGAAUCCUUCAUUGAAUGGCUUAGCUUUAUCCCCU  
UAAUGCUGUUCUUGUGGUAGUGAGGGAAUUCUUGCAAUAUCUGGUUGUUUAAAAGUGUGUAGCACUCCCC  
CCCCAACACUCUUUUGUUCUGUCCAAUCUGUGUGAAGUGCUCACUCCCCCUUUGCCUUCUGCUAUGACU  
GUUAAGUUUCCUGAGGGCCUUCCCAGAAGCUGAGCAGGUGUCAGCAUCAUGCUUUCUGUAUAGCCUGAGGA  
ACCAUAAGCCAAUUAACCCUUCUUCUUAUAAAAUUAACCCAGUCUGAGAUAUUUCUUCUUCUUCUUGA  
GACAGGGUCUGGCUCUGUCACCCAGGCUGGAGCGUAGCUGCACCUCUGCCUCCAGGGCUCAAGUGAUCCU  
CCCACCUAGCCUCACAAGUCACUGGGACCACAGCACGUGCCACCACACCCAGCUAAUGUUUGCUUUCU  
UGUAGAGACAGGGUUUCACCAUGUUGCACAGGCUGGUCUAAACUCCUGAGCUCAUGCGAUUCUCCUGUC  
UUGGCCUCCCAAAGUGAUGGGAUUACAGGUUUGAGCCACUGCACUCAUCCUAGGUUUUCUCUAUAGCAA  
UGCAAGAAAAACUAAUACGAAGGUGAAUCCAUCUGCAGAUCCAGACUCCACAGGAAGCCAGCAAGUGUGA  
UUGCGGGCUCUGCUGCAUUUCAGGGGCGGUUCUAUACUUGGCACGUGCAUGCUUCCCCAGCCUAGCAUA  
UUAGCCUGCUGGGGCUACUAUAACAAAAUACCACAAACUGAGUGGCUUAAUAACAACUGAAAUGCAUUCUC  
UCACACUUCUAGUGGCCAAAGUCCAAGAUCAAAGUUUUGGCAGGGUUGGCUCUUCUGGACACUCAGAGG  
GAGAGUCUGUCCUGUGUCUCUCCCCUGGCUCUCCUGGUUGCUGGCAACCCUUGGCAUUUUUUGCUUAUA  
AAUGCAUCCUCUUAUCUCAGCCUGUACUGUCACGUGACCUCUUCUCCUGUGCAUCUGUCUCUUGUCCUC  
UUCUUCUAAGGACAGCAGUCAUAUUGGAUUAAGGGCCCAGCCACUCCAGCAUGACCUCUUAACUUGA  
UGGCAUUCAAAGCCAUCAGGUUUGGAAACAAGGUCACAUUACCAGGGACCGGAGGCUAGGACUUGAAGAU  
ACCCUUUGGGAGGAGACACCUGCAACGUUUGGAUUGGAGAAGACUCAGUGACCUCUGGGGAUGUCGUUA  
CCCUCCUUGGGCUGCAGCUUCCUUGUUUGUAGAGGAAGAGGUUAAAUUAAACAAUCUCUCCAGGUC

>NR\_131768.1 Homo sapiens long intergenic non-protein coding RNA 1601 (LINC01601), long non-coding RNA  
TCCAAGCACCTCTGCAAAATCCACTTCTCACAAACATGATAATTATGATGTTATCTGTGGTCATTTGACTG  
AAATCTAAGCCAATGGAATGGGAATAGAGATATCTGTGCCACCTACACCTTCACACCTGGTCAATGAAAA  
CTGCCTGCATGTTCTCCACCTTTCAACTGATGGCAACACTAGAAGTGTCTTAGCAGCCTACAGTGTA  
TCTTGGCCAAAAGAAAGAACCAGAACTTGAAGATGTAATCAAAGACTTTTCATTTCAGGAGTATCAAGGAAT  
TGTGACCCGTCTCTATAGCCTCCAGACCTTGACAAAGAAGACAGAATTGCTTCTCAGTTCCCTCAGAGCAG  
AACTGTGCATGAAATGAGACCCATCAATAATTTCTGGAGCCCATCTCACAGCTGTGTGTTCCAACAGCA  
GGCTTATACCCCTGGCGTTTTCAACAACATGGCCTAAGGCACAGCCTTATAGGCTTTCTAGAAGAAAAAC  
TTCTTTGGGAGCCCTTTCTGCTCACTTACCAGCCCTGTGATTTCATGAAGATAAAGATTATATGAGATAA  
TATATGCAAAATACTGTGAAAACTACTAGGGCAAGTATAAGGAATTATCATCTAATTTAGCTGGCTACAG  
ATACCCAATGGTTCATCCAGAAGTTTGTTCAGCTAACAGCAGTTGTGCCTCTTTTCATGAGACTTATCAT  
CCTTTGGTGGACTAGACTAGACTTATTTGGAACATGGAGACCTAAGAGTTTCAAGACTGAAAGCAAATGA  
TTAGGACATTTCCCTAAGGTCTAACCCCAAGTCAATATAGCTTTGCTGTGCTGTATTCTTTGGGTCAAA  
GAAAATCACAAGGTCAGGCCAGGTTCAAGGGAAAGGGAAAAATATGCTCCACCTTGTGATGGCAGATTTGG  
AAATAATCACATACAAATAAAATAAAATTTAAACATGAAAAAAA

RNA

>LINC01601

UCCAAGCACCUUGCAAAUCCACUUCUCACAAACAUGAUAAUUAUGAUGUUAUCUGUGGUCAUUGACUG  
AAAUCUAAGCCAAUGGAAUGGGAAUAGAGAUUUCUGUGCCACCUACACCUUCACACCUGGUCAAUGAAAA  
CUGCCUGCAUGUUCUCCACCUUUAACUGAUGGCAACACUAGAACUGUCUAGCAGCCUACAGUGUAAA  
UCUUGGCCAAAAGAAAGAACCAGAACUUGAAGAUGUAAUCAAAGACUUUCAUUCAGGAGUAUCAAGGAU  
UGUGACCCGUCUCUAUAGCCUCCAGACCUUGACAAAGAAGACAGAAUUGCUUCUCAGUCCUCAGAGCAG  
AACUGUGCAUGAAAUGAGACCCAUCAAUAUUUUCUGGAGCCCAUCUCACAGCUGUGUGUCCAACAGCA  
GGCUUAUACCCUGGCGUUUUAACAACAUGGCCUAAGGCACAGCCUUAUAGGCUUUCUAGAAGAAAAAC  
UUCUUUGGGAGCCCUUUCUGCUCACUUAACCAGCCUGUGAUUCAUGAAGAUAAAGAUUAUAGAGAUAA  
UAUAUGCAAAAUACUGUGAAAAACUACUAGGGCAAGUAUAAGGAUUAUCAUCUAAUUUAGCUGGCUACAG  
AUACCCAAUGGUUCAUCCAGAAGUUUGUUCAGCUAACAGCAGUUGUGCCUCUUUCAUGAGACUUAUCAU  
CCUUUGGUGGACUAGACUAGACUUAUUUGGAACAUGGAGACCUAAGAGUUUCAAGACUGAAAGCAAUGA  
UUAGGACAUUUCUUAAGGUCUAAACCCAGAAAGUCAUAUAGCUUUGCUGUGCUGUAUUCUUUGGGUCAA  
GAAAUCACAAGGUCAGGCCAGGUUCAAGGGAAAGGGAAAAUAUGCUCCACCUUGUGAUGGCAGAUUUGG  
AAUUAUACAUACAAAUAAAAUAAAAUUAAAACAUAGAAAAAAA



>NR\_040074.1 Homo sapiens long intergenic non-protein coding RNA 1630 (LINC01630), transcript variant 1, long non-coding RNA  
AATTGGATATGGGTATTGTAGCTGAAACGCTCTTGCGAGCTGAGTCAGGGTCGGGGAAGCTGTGATGGCAA  
TGAGAAGTCAACACACTGAGGATGGAGAGAAAAGAAGATGAGTCTGGGAGAGAAAAGAGAATGATTCTTCTG  
GCCGAGGGAAAAGCAAGAATATCTGTTCTTGCAACTGCACTGATTCTAGAAACACTCTCTATTTCGAACCTCT  
CATGAGGTGCTGACCTGCTTGTTGGTGAATGCTGGGATCTCTGGAAGAGGGAGGCAGACATCACACACCAGCT  
GGCAAGTGGGAGCTGGCATGCAACATGCCCCAATACCCTCCCTCCCTGCCATCCCTATCTCCTAATGGT  
GCCTCCTTTTGGCCAAACCCACCTTTGGCTGGAGGGCAACAGAGCCCATTGACGTGGTCCCCCTGCATCT  
GCTACCTGGGGAGAAAAAGCAGGATGGACACTGAATCTAGAGAAATGAAGAAACCCATCCAGAAGAATACT  
GCTTCTTTATGTTTTTGTAGGTGTACAAATCAGGCCCTCCCCATGATATTCTAAACTCCTTGAGGAAAGAA  
GTGGAGTCTTGGGCTTCTGATGTAGCCTCCACAGTGCTCAGGGGATAGCGACACTGGCACCCCTATAGATA  
TTTAATTACATGTGGACTGGAAGAGACCAAACAGCTTCCTGGTATTTCAATCAAACCCGGTGCTCTAGAC  
CTGTGGCTCACTCTGAGCAAACATAATGAGTTGAACCTGAATCTGATTCCTGCTAAGAAAGGTTTCATT  
TTAATAGGCAGTAAGGCTATGAGCTAACACCAGAAATTCATTTCGAGTTACTAGACTCACTGAAACTCCTCA  
CAGGATCCATCTTTTCATGTTTTCTAGATTTTGGTATTTCTTATCTAAACTGCAGACCCAGAAACCCCTATGG  
ACCCTACCTTTCCAATTATATTTCTGGGAAGAGTCAATCTCTGCAGAGCTGAAGCATGTAACAGAAAGTT  
CTCAACCTGAAAAATATACCTTCTGCGCCCAAGCCCCACTTTCTGCCACTATTTGGTAATCTCAAGTGGG  
TGAGGTGGTCTCTGAACTTCAGCGCTCTCATGGTCAGAGCCACAAGGGGTACTTGGGAGGCTAAAGGGAA  
GTGGCAAACGTGGCTGAGATTTCAGAAAAGAAAAGCAGCAAGTGTAGAGAGGCAAGGACTTTTCCATCTTTT  
AAATTCTTAAAGGAAGCCAAAGTTTCAATTTCCAGTCTCCTTCAGATGCCTCTCCAATCCTTCACAGCAG  
CGCACACATACCGCAGAAGGAACTCACCATCACAAAAAGATGACAGAGCACTGGGGGCTGGGGTGGCACT  
TGTGTTGGCTGAGAGCCTGGATGCATGTGAGGTCAAGCCTGACCTTGGGAAAGCTGCTCTCTGGACATTA  
CTTGCTGTGCCACATACACAGCTTGGGTTTTCTGAGGAAACAAACACAGGCTCTAAGGAGGAATGGAACGG  
GGCCAGGTATATATCTTTTACAGCCCGTACTTTTGTAGGAAAAATAGAAGACAAAAGTTTTTAAAAAACAC  
AAAGTGTATACAGTATACACAAAGTTTACAAAGTTTGTGTGTTTTTAACATCTACTCTCCTTAAGAACAAG  
TAGACAGGAAAAGATATTACCTGATATGGGTTAAATTGTGTCCCCAAAAACATGTTTTGAAGTGCTAACCT  
TTGGTACCTGTGGATATGACCTTACTTTGGAAAATAGGTTTTTGCAGACGTAACCAAGTTAAGATGAGGTCA  
TATTTGATTAGGCTGAACCCCTGAATCCAGTATGACTGGGGTCCTTATAT

RNA

>LINC01630

AAUUGGAUAUUGGGUAUUGUAGCUGAAACGUCUUGCGAGCUGAGUCAGGGUCGGGGAAGCUGUGAUGGCAA  
UGAGAAGUCAACACACUGAGGAUGGAGAGAAAAGAAGAUAGUUCUGGGAGAGAAAAGAGAAUGAUUCUUCUG  
GCCGAGGGAAAAGCAAGAAUAUCUGUUCUGCAACUGCACUGAUUCUAGAAACACUCUCUAUUCGAACUCU  
CAUGAGGUGCUGACCUGCUUGGUGAAUGCUGGGAUCUCUGGAAGAGGGAGGCAGACAUCACACACCAGCU  
GGCAAGUGGGAGCUGGCAUGCAAUAUGCCCCAAUACCACUCCCCUCCUGCCAUCCCUAUCUCCUAAUGGU  
GCCUCCUUUUGGCCAAACCCACCUUUGGCUUGGAGGGCAACAGAGCCCAUUGACGUGGUCCCCUUGCAUCU  
GCUACCUGGGGAGAAAAGCAGGAUGGACACUGAAUCUAGAGAAAUGAAGAAACCAUCCAGAAGAAUACU  
GCUUCUUUAUGUUUUUGUAGGUGUACAAUCAGGCCUCCCCAUGAUUAUUCUAAACUCCUUGAGGAAAGAA  
GUGGAGUCCUGGGCUUCUGAUGUAGCCUCCACAGUGCUCAGGGGAUAGCGACACUGGCACCCUAUAGAU  
UUUAUAUACAUGUGGACUGGAAGAGACCAAACAGCUUCCUGGUUUUCAAUCAAACCCGGUGCUCUAGAC  
CUGUGGCUCACUCUGAGCAAACUAUAAUGAGUUAACUUGAAUCUGAUUCCUGCUAAGAAAGGUUUCAUU  
UUAAUAGGCAGUAAGGCUAUGAGCUAACACCAGAAUUCAUUCGAGUUACUAGACUCACUGAAACUCCUCA  
CAGGAUCCAUCUUUUAUGUUUUUAGAUUUUGGUUUUUAUUCUAAACUGCAGACCCAGAAACCCUAUGG  
ACCCUACCUUUCCAAUUAUAUUCUGGGAAGAGUCAUUCUCUGCAGAGCUGAAGCAUGUAACAGAAAGUU  
CUCAACCUGAAAAUAUACCUUCUGCGCCCAAGCCCCACUUUCUGCCACUAUUUGGUAUUCUAAUGGG  
UGAGGUGGUCUCUGAACUUCAGCGCUCUCAUGGUCAGAGCCACAAGGGGUUACUGGGAGGCUAAGGGGAA  
GUGGCAAACGUGGCUAGAUUCAGAAAAGAAAAGCAGCAAGUGUAGAGAGGCAAGGACUUUCCAUUUUU  
AAAUUCCUUAAAGGAAGCCAAAGUUCAUUUCCAGUCUCCUUCAGAUGCCUCUCCAUCCUUCACAGCAG  
CGCACACAUACCGCAGAAGGAACUCACCAUCACAAAAAGAUACAGAGCACUGGGGGCUGGGGUGCCACU  
UGUGUUGGCUGAGAGCCUGGAUGCAUGUGAGGUCAAGCCUGACCUGGGAAAGCUGCUCUCUGGACAUUA  
CUUGCUGUGCCACAUACACAGCUUGGGUUUCUGAGGAAACAAACACAGGCUCUAAGGAGGAACUGGAACGG  
GGCCAGGGUAUAUCUUUUACAGCCCCGUACUUUUUGAGGAAAAUAGAAGACAAAAGGUUUUAAAAAACAC  
AAAGUGUAUACAGUAUACACAAAGUUUACAAGUUUGUGUGUUUUAACAUCUACUCUCCUUAAGAACAAG  
UAGACAGGAAAGAUUAUACCUGAUAUGGGUUAAAUUGUGUCCCCAAAAACAUGUUUUGAAGUGCUAACCU  
UUGGUACCUGUGGAUAUGACCUUACUUGGAAAUAGGUUUUUGCAGACGUAACCAAGUUAAGAUGAGGUCA  
UAUUUGAUUAGGCUGAACCCUGAAUCCAGUAUGACUGGGGUCCUUUAUAU

>NR\_110763.1 Homo sapiens long intergenic non-protein coding RNA 1882 (LINC01882), long non-coding RNA  
GCGACCTTGAAGCGGCATCCGAGGAGATGTGGCCACGGGGCAGGCGACCGACACCAGCGAGTCCAGAGGG  
CCAGCGTGTGCACCACTGTGTGTCTCCAGAGACTTCAGGAAGCAGCCACCACGCCCAGGAATGCAGGAA  
GATGGACACACGGCTGGGGAAGTACAATGAAAGGCCAAGTAGGCAGCCTGTTCTCCTCAGATCAGTCCCC  
CACGAACACTCATTCCCGAGGACTCATCCAATACTAATAAGAGAATGCTCTTGTTTTTTAAGAATTTTCT  
GAAAGCCATCCTGACAAATTAAGTAGAGTATGCTGAAGATAGTCAGACTTTGTTTTTTAAGAATTGAATAT  
TCTGGAAGAGGCTCTTCAGTCCAATCTTTAGTTCTCTCCACAGAGCAAACGAAGTGAAGTGCTGAAGGCC  
TGGAGCCCAGCTGTTCCACACGGACTCCAGGACAGTTAAGGCAGGGTTGCCTTAACATAATCTCTGAC  
AACTGTTTCTTCTGTCTTTCTCCTAAAAATGGAATGCAGGCCATCTATTCTAGGGAAATAAAGGATTCTA  
GTTATGTGAATCCA

RNA

>LINC01882

GCGACCUUGAAGCGGCAUCCGAGGAGAUGUGGCCACGGGGCAGGCGACCGACACCAGCGAGUCCAGAGGG  
CCAGCGUGUGCACCACUGUGUGUCUCCAGAGACUUCAGGAAGCAGCCACCACGCCCAGGAUUGCAGGAA  
GAUGGACACACGGCUGGGGAAGUACAAUGAAAGGCCAAGUAGGCAGCCUGUUCUCCUCAGAUUCAGUCCCC  
CACGAACACUCAUUCCCGAGGACUCAUCCAAUACUAAUAAGAGAAUGCUCUUGUUUUUGAAGAAUUUUCU  
GAAAGCCAUCCUGACAAAUAAGUAGAGUAUGCUGAAGAUAGUCAGACUUUGUUUUUAAGAAUUGAAUAU  
UCUGGAAGAGGCUCUUCAGUCCAAUCUUUAGUUCUCUCCACAGAGCAAACGAAGUGAAGUGCUGAAGGCC  
UGGAGCCCAGCUGUUCACACGGACUCCAGGACAGUUAAGGCAGGGUUGCCUUAACUAAUUCUCUGAC  
AACUGUUUCUUCUGUCUUUCUCCUAAAAAUGGAAUGCAGGCCAUCUAUUCUAGGGAAAUAAGGAUUCUA  
GUUAUGUGAAUCCA

>NR\_146509.1 Homo sapiens long intergenic non-protein coding RNA 1887 (LINC01887), long non-coding RNA  
GAAAACTAAGTGGCTTCCCTTGAGGCAGCCCGAGGGCTCCACTGGACCCAGAACTCTGAGTTCTGATGCT  
GCCTATCATTTGCTTTTCCCTCATGAGCTCCTGGACCACCTCATATCACCAGCACCCTCTACCCAAGGTCC  
TGGAGCCAACTGAGTAAAGAGCACAAGAGAACTCCTTAGAGGTGGAAGGATACCCCTCTGAGGTCAA  
ATCATTGGGCTTGTGGCCATGAGACCACAGACTTTGCCTGGCTTCCAGTGACTGTCCGAGATGACCTGTG  
GAGTGACCCGCTGTACTTGGACATCACTGTCTTTTCGGATCCATACCCGTCATCCTTGGAAATTTCCCT  
GCATCCAAACCTGTTCCCTGATACAGGTGTGAGTAATGAATAACCCTAAGGAATATCTTGGATGTCTTCAC  
GGGGCTTATGACTTATTCTGAGGTTTACAAAATAGAGGCCCCAGCTGAGCAAAGAGAGGGCTGCAGCGC  
CGAGGGAACAGCTGCCGACTCACCGGAGAGGCCCTCCTGGAGCACGCCGGGACCCCTCCACCCCTGGC  
TTTGGCTGCATCAATGGCTAGTTTGCCTGAACATATCTGAGCCACTGAGAGTATTTATTAAGCAGAGAA  
TAATTTTGGAGTTTCACTTTTATAACTTTTGTCTTCAAAGTTGTTTTGGATAATTTAATGAAATGACTGTA  
AACCAGAAATCCCTTTTCAATTATTTCTTGTGTCAATATAAAAAGAGTTGATGATTTTAAAGCCAGTG  
AGATGTCCCTGTCTGTGGATGTCAGCGGAGGGTGGGGTCTGACGCCCTTCTCTGGTGGCTGTCCAGGAA  
GATTGCCCCAGCTTGCACTCCCTTTTGGCGGGTTCAGAGCCCTCCATTTGAAAGGAGCATCTCTACCA  
CTCTGCCCCACCCAGCACCAGCTCTTCTGGAACCCACTGACTTCCTAAACACTTTCTCTCTCTCACCT  
CATTGAATTCAGACTTTAGAAAAAGCCAAAACTCTAGAGGTGGGGTGGGTTCGATCTGGAATCCC  
TGCTGTAATCTTTTTAAGGGAATCCACTGGAAATTTAATTTATGTTTTAAATAAAACCATTCCTTACT  
TAACAGAAATATTAAGCCACTCATTTTTTTAACAGAACTTTCGAGATATAATTAATGCCATAAATTTCA  
CCCCACACAGTGTACAATTCAGGTTTCCAATATAGTCACAGAAGTCTCTGCAACAATTACCACAATT  
TTAGACATGAAGACCATTTGTTGGCAGCCCTACCTGCCCTCTATGTGTATGTATATAATTTAATATTGGA  
TTGGATACTATAGTAATATTGTACTGTTACCTATTTGTGTTTTTATATTGCTGTTTTATTTATTCAGAT  
GAATAATAATTATCTCCATATAGTCATACATTTATATAGGGTTAAACACACCTTTTTACAATTCATAAA  
TTAAATTGGTCAGGTATGGTGGCTCACGCCTGTAATCCAGCACCTTTGGGAGGCCAAGGCGGGTGATCA  
CCTGAGGTTGGGAGTTTGGAGCCAGCGTGATCAACATGGAGAAACCTGTCTGTACTAAAAATACAAAA  
ATTAGCCAGGCATGGTGGCACATGCCGTGAATCCAGCTACTTGGGAGGCTGAGGCAGGAGAATCACTCG  
AACCAAGGAGGCGGACATTGCGGTGAGCCAGGATCGCACCATTGCACCTCCAGCCTGGGCAACAAGAGCAA  
AACTCCATCTCAAGAAGAAAAAAAAAAAAAAAAAGTAAATTGTTTTTAATTACATAAGAAACACGTGTTATT  
GTTATAGAAATTCACATAGTGCTTCGGTCTATAGAATAAATGTATCCCCACCACCTCCCAGCCCACCCAC  
TCGTCTGCATTACCTACACACAGTTAAACATGCACATATGTTTCCGTGACACGATCTTGCTTTGCATAT  
TGTTCACTGACTGGCTTTTCCATATAAGATTTAATTTGGTGATTATTGCTTATCAGTACCTATAGGTCTC  
TCTCATTATTATTTATAATTACATCATTATTCATAGGGTATTTTACCACAATTTGGTCACTTTTTCACT  
GAGGAATTTTTATGTCTAGTTTCTAGTTATTTGTTATTGTTACCAATGCTGTACTGGGCATCCCTGTATATC  
CACCTTTTTGTTGCATTAGTTAAGTGGTTTTTTTCTTTTATGATTGATTTCTAAAAATAAAATACTGCAG  
CAAA

RNA

>LINC01887

GAAAAUAAGUGGCUUCCUUGAGGCAGCCCGAGGGCUCCACUGGACCCAGAACUCUGAGUUCUGAUGCU  
GCCUAUCAUUGCUUUUCCUCAUGAGCUCCUGGACCACCUCAUAUACACCAGCACCUCUACCCAAGGUCC  
UGGAGCCAAACUGGAGUAAAAGAGCACAAGAGAACUCCUUGAGGUGGAAGGAUACCCUCUGAGGUCAA  
AUCAUUGGGCUUGUGGCCAUGAGACCACAGACUUGCCUGGCUUCCAGUGACUGUCCGAGAUGACCUGUG  
GAGUGCACCCGCCUGUACUUGGACAUCACUGUCUUUUCGGAUCCAUACCCGUCAUCCUUGGAAUUUCCCU  
GCAUCCAAAACCUGUUCCUGAUACAGGUGUGAGUAAUGAAUAACCCUAAGGAAUAUCUUGGAUGUCUUCAC  
GGGGCUUAUGACUUAUUCUGAGGUUUAACAAAUAAGAGGCCCCAGCUGAGCAAAGAGAGGGCUGCAGCGC  
CGAGGGAACAGCUGCCGACUCACCGGAGAGGCCUCCUGGAGCACGCCGGGACCCCUCCACCCCUUGGC  
UUUGGCUGCAUCAAUGGCUAGUUUGCCUGAACUAUAUCUGAGCCACUGAGAGUAUUUAUUAAGCAGAGAA  
UAAUUUUGAGUUUCACUUUAUAACUUUUGUUUCAAAGUUUUUGGAUAAUUUAUGAAAUGACUGUA  
AACCAGAAUUCUUUUCAUUAUUUCUUUGUGUCAUAUAAAAAGAGUUUGAUGAUUUUAAAAGCCAGUG  
AGAUGUCCCUUGUCUGUGGAUGUCAGCGGGAGGGUGGGGUCUGACGCCUUUCUCUGGUGGCUGUCCAGGAA  
GAUUGCCCCAGCUUGCACUCCCUUUUGGCGGGUUCAGAGCCUCCAUUUGAAAGGAGCAUCUCUCACCA  
CUCUGCCCCACCCAGCACCAGCUCUUCUGGAACCCACUGACUUCUAAACACUUUCUUCUCCUUCACCU  
CAUUGAAUUAAGACUUUAGAAAAAGCCAAAAACUCUAGAGGUGGGGUGGGUUCGAUCUGGAAAUCCC  
UGCUGUAAUUCUUUUAAGGGAAUCCACUGGAAAUUAUUAUUUAUGUUUUAUAAUAAAACCAUCCUUAU  
UAAACAGAAUAUUAAGCCACUCAUUUUUUAACAGAACUUUCGAGAUUAUUAUAAAUGCCAUAAAUUUA  
CCCCACACAGUGUACAAUUCAGGUAUCCAAUAUAGUCACAGAAGUCUCUGCAACAUAUACCACAAU  
UAGACAUGAAGACCAUUGUUGGCAGCCCUACCUGCCUCUAUGUGUAUGUAUAUAAUUUUAUUAUUGGA  
UUGGAUACUAUAGUAAUAUUGUACUGUUACCUUUUUGUUUUUAUUAUUGCUUUUUUAUUAUUAUUAU  
GAAUAAUAAUUAUCUUAUAGUCAUAACUUAUUAUAGGGUUAAACACACCUUUUUUAUUAUUAUUAU  
UUAAAUUGGUCAGGUUAUGGUGGCUCACGCCUGUAAUCCAGCACUUUGGGAGGCCAAGGCGGGUGGAUCA  
CCUGAGGUUGGGAGUUUGAGACCAGCGUGAUCAACAUGGAGAAACCCUGUCUGUACUAAAAUACAAAA  
AUUAGCCAGGCAUGGUGGCACAUGCCUGUAAUCCAGCUACUUGGGAGGCUGAGGCAGGAGAAUCACUCG  
AACCAAGGAGGCGGACAUGCGGUGAGCCAGGAUCGCACCAUUGCACUCCAGCCUGGGCAACAAGAGCAA  
AACUCCAUCUCAAGAAGAAAAAAAAAAAAAAAAAGUAAAUUGUUUUUAUUAUACAUAAGAAACACGUGUUAU

GUUAUAGAAAUUCACAUAGUGCUUCGGUCUAUAGAAUAAAUGUAUCCCCACCACCUCCCAGCCCACCCAC  
UCGUCUGCAUUCACCUACACACAGUUAAACAUGCACAU AUGUUCCGUGACACGAUCUUGCUUUGCAUAU  
UGUUCACUGACUGGCUUUCCAUUAAGAUUUAAUUUGGUGAUUAUUGCUUAUCAGUACCUAUAGGUCUC  
UCUCAUUAUUUUUAUAAUUAUCAUCAUUAUCCAUAGGGUAUUUUACCACAAUUUGGUCACUUUUUCACU  
GAGGAAUUUUUAUGUCAGUUUCAGUUAUUUGUUAUUUGUUACCAAUGCUGUACUGGGCAUCCCUGUAUAUC  
CACCUUUUUGUUGCAUUAAGUGGUUUUUUCCUUUUUAUGAUUGAUUUUCUAAAAUAAAAUACUGCAG  
CAA

>NR\_146900.1 Homo sapiens long intergenic non-protein coding RNA 1892 (LINC01892), long non-coding RNA  
AAGAAGTTGGCCTTAGCCAGAATGGAGATACCTGATCATCAGAGGCTGGAGGAAAGCAGGTTCCCTCAAAA  
AACAAACAACAACAAAAAACAACAAACATGAAGAAGCCAAATCTGGAGGATGAGTTTTCCAAATTAAA  
CACTGAATATTGTTGTAGAGTAAATGATACTGTTTGTAAAGAGATGTTTTTACTAGACATCCTCTTCCT  
AGCCACCTATTAAGGAATAACTAGAATATATATTAACAGCAAGACATCGGAAATTATCTTTGCACCTGAC  
AAAATGTTAAGATTGAGAAATTTGGCTGGATGCTCCTAAAGAGCTACTGAAATAGACTCAATGGCAGCTAC  
GATGCCCAACAGAAGCAGCGATGCCTGGTGCACATAGCAGGTTGCTAGCAGGAGTCATCTGGGGTGATT  
ACCTGTCTTGTGTTGGTGAGGATATGGACATCATCTGGGGACTCTCAGAAATCCCTGAAGTGATATAGAGTC  
CCACATGAGCTTGCTGTGGTGTTTTACAAACCAATAACGTAGTGTTCATAAACCAAAGTCACTTGGAGC  
TTCAGAATTGTAAATATTTCTCAAGAAGGTTTTTCAGGCCGGCTTATACCTGGAAAACTTACAGATCTAC  
TTGAAGCCTCTCTAAGCTCCCGACTAGTAAATTTCCAAAAAATCAGCTTTCAAGATGATTTTCCGTTGG  
GTCTGATGAAGATTCTACCTTCACTAGACTCTACCCAGGCTCCTCTGAGCCCTCTTCTCAACTAGATCT  
CAACTGTGGTCTATAAAGGCTTAACACTAACATAGTTTCCAACAGCTCAACCCACATCCCAAAGGTGTT  
CTTCACTAGCCTTAAAGTGCTGGCCTGAGAAAACCAAGACTGCCAAATGAATCTGCGTTTTTTCCAGGC  
ATCACCTGAAGATAAGGCCCTGTCTCCTAGTCTCTGTGGGAAGGCGAGAACCCTAGCTTGGATAAGCGCC  
AGTCAAAAAACCCACATGGTTTTCCCATGGACCAACTCCACTTTTACCACTTTTGGGAATTTTTTCACTTTCC  
TAACTGAGCCCTACTTTCCCTCTCCCTAATTCCTTCTTTTATCCTTAAAAATGCCAGTCACTTCTGT  
CAACTCGAAGTTGAATTTTGTTCACACTGGACTCTTTTCCCTATTGAAATAGTTATCACTGATTAAATC  
TGTCTTACCACCTTAA

RNA

>LINC01892

AAGAAGUUGGCUUAGCCAGAAUGGAGAUACCUGAUCAUCAGAGGCUGGAGGAAAGCAGGUUCCUAAAA  
AACAAACAACAACAAAAAACAACAAACAUGAAGAAGCCAAAUUCUGGAGGAUGAGUUUCCAAAUUAAA  
CACUGAAUAUUGUUGUAGAGUAAAAUGAUACUGUUUGUAAAGAGAUUUUUUACUAGACAUCCUCUCCU  
AGCCACCUAUUAAGGAAUAAACUAGAAUAUAUAUUAACAGCAAGACAUCGGAAAUUAUCUUGCACCUGAC  
AAAAUGUUAAGAUUCAGAAUUGGCUGGAUGCUCUAAAGAGCUACUGAAAUAGACUCAUUGGCAGCUAC  
GAUGCCCAACAGAAGCAGCGAUGCCUGGUGCACAUAGCAGGUUGCUAGCAGGAGUCAUCUGGGGUGAUUC  
ACCUGUCUUGUUGGUGAGGAUAUGGACAUCUUCUGGGGACUCUCAGAAAUCCCUGAAGUGAUUAUAGAGUC  
CCACAUGAGCUUGCCUGUGGUGUUUACAAACCAUAACGUAGUGUUAUAAACCAAAGUCACUUGGAGC  
UUCAGAAUUGUAAAAUAUUCUCAAGAAGGUUUUCAGGCCGGCUUAUACCUGGAAAAACUACAGAUUCUAC  
UUGAAGCCUCUCUAAAGCUCCCGACUAGUAAAUUCCAAAAAUCAGCUUUCAGAUGAUUUUCCGUUGG  
GUCUGAUGAAGAUUCUACCCUUCACUAGACUCUACCCAGGCUCUCUGAGCCUCUUCUCAACUAGAUCU  
CAACUGUGGUCUUAUAAAGGCUUAACACUAAAUAGUUUCCAACAGCUCAACCCCAUCCCAAAGGUGUU  
CUUCACUAGCCUUAAGUGCUGGCCUGAGAAAAUCUAAAGACUGCCAAAUAGAUUCGCGUUUUUCCAGGC  
AUCACCUAGAAGAUAAAGCCCCUGUCUCCUAGUCUCUGUGGAAGGCGAGAACCUAGCUUGGAUAAGCGCC  
AGUCAAAAAACCCACAUGGUUUCCAUUGGACCAACUCCACUUUACCACUUUUGGGAUUUUUACUUUCC  
UAACUGAGCCCUACUUUCCCUUCUCCCUAAAUCCUUCUUUUUUAUCCUUAAAAUGCCCAGUCACUUCUGUA  
CAACUCGAAGUUGAAUUUUGUUCACACUGGACUCUUUCCCUAUUGAAAUAGUUAUCACUGAUUAAAAUC  
UGUCCUUACCACUUUA

>NR\_146903.1 Homo sapiens long intergenic non-protein coding RNA 1894 (LINC01894), long non-coding RNA  
ATTCTCAAGTGAGCCACAGGAAGAGTCCTGTTTTGAGGGCAAGGCTTTTTCTTGAAAAC TACTCTCTAT  
GCAGCTCATTCCTGAAGAAGGGCTTTGGCATGTGGAGATTATGCCCTCTTGCTAGGGTACTGGAAGGGAT  
CCATGTGGTATTGTCCAGCAATAACTCTGCCACAGAGATATGCGATCTCCAGCAGCTGTCGGCAGGCTT  
CACTCCCATTCCATCCTCCTTCCTGCATCCAGTAGTCTCCAGCCCCGCCCTCACCCTCCCCTGCTCCAG  
AAGAATGACAGAACTCAGAGCTGCAAGAGAAAGAAGACTGAATTTCAGTCTCTCTTGAGAAAAATTGTTT  
TCCGTCAAGTTGATAATAATGATCACACTGAGAATGAATGACTCAAGATGAATATCCAAAGATATATCAA  
AACCTGGTCAGCAGTCGTGGGGAAAAGGAAAGAAAGCCTGAGTTGAGTTTATGAAAGTTTTCCACTAAAGTC  
AGCAACAGCTTAAATTCAAACCAGGCACAAGACGCTTGAATCTCCATATGAGTTGTTTCATCAAAGGGCTG  
AAAGAAAAGAAATCTGAGCCCGAGCACGGTCTGGCCTAAAAGCTTTCAAGTGACTCCTTTCTGTTGCAAA  
TGAAAGAAGTCCTGCTACTCTAAAGAATAACTAAACCAGACTGGAGTCACTGAAACTGATGGAAGAACAT  
CTCAGGCATGAGTGCCATGGTGACGTCATCAGCTCCGTTTACAACCACCTACCATGAGGCCATTGCTCCT  
GTGGAGGACACTGGCTTAGGACTCATGAAGTAGTACCTCAGGAAGGTGTCTCTGTAAGTGTTCCTTCCAC  
CAGCTCCAAGACACAATGAGATGGAGAGAACTGGAACAATTCCTTATGATTGCAGCTGGATATTTTACACA  
TGAATATCTAGTAATGAAGGCAATGGCATGTGGTGTGGCAAAGACTGGCCCCAGATTACATTTCCAGTC  
CTTTTGTACTGAGGAGGGGCTTTGGGACCAAGACAGTAGGAGTGAGGGTACAGGTTCCACATTTCTATTTCT  
TCTCTTAGTTTTCTGTGGTTATCTTGGTGACTGCATGGTAAAGATGGAGGTGACAAAAGATGGAAGGAGC  
CTGGATCCCTGAATGACTTCATGGTGACAGCCCTTACACTACCCCCAACTCATACTAAAACAGGGGTGGG  
AGGAACAATAGACCATTATTTCTGTTAAGGTGCTGAAATTGTAGAGCTGTTAATTTGAACAGTTAGAGTTT  
CTTATACTGATACAGTATCCTTACCCTGGATTGTTGAAATAATTAGTCCAAATAGTTTCTTTGCCATAAAA  
CTGTGGACAGAGCCTAAGCAATATTGAATCCAAGACAAGGTATATTTATCATCAAATGCTACTCACTATA  
CAATACAGATGAATGTGGCACTTACTTCCCCTGTTGTTACCCAGCCTGCTTCTAGTATTCTTTACACAAA  
ATAACATTTCATGAGCAACCTGGGCACA

RNA

>LINC01894

AUUCUCAAGUGAGCCACAGGAAGAGUCCUGUUUUGAGGGCAAGGCUUUUCUUGAAAACUACACUCUCUAU  
GCAGCUCUAUCCUGAAGAAGGGCUUUGGCAUGUGGAGAUUAUGCCCUUUGCUAGGGUACUGGAAGGGAU  
CCAUGUGGUUAUUGUCCAGCAAUAACUCUGCCACAGAGAUUAUGCGAUCUCCAGCAGCUGUCGGCAGGCUU  
CACUCCCAUUCUCCUCCUCCUCCUGCAUCCAGUAGUCUCCAGCCCCGCCUCACCCUCCACUGCUCCAG  
AAGAAUGACAGAACUCAGAGCUGCAAGAGAAAAGAAGACUGAAUUCAGUCUCUCUUGCAGAAAAAUUGUUU  
UCCGUCAAGUUGAUAAUAUGAUCACACUGAGAAUGAAUGACUCAAGAUGAAUAUCCAAAGAUUAUCAAA  
AACCUGGUCAGCAGUCCUGGGGAAAAGGAAAGAAAGCCUGAGUUAGUUUAUGAAAGUUUCCACUAAAGUC  
AGCAACAGCUUAAAUAUCAAACCAGGCACAAGACGCUUGAAUCUCCAUAUGAGUUUGUUAUCAAAAGGGCUG  
AAAGAAAAGAAAUCUGAGCCCGAGCACGGUCUGGCCUAAAAGCUUUAAGUGACUCCUUUCUGUUGCAAA  
UGAAAGAAGUCCUGCUACUCUAAAAGAAUAACUAAACCAGACUGGAGUCACUGAAACUGAUGGAAGAACAU  
CUCAGGCAUGAGUGCCAUGGUGACGUCAUCAGCUCCGUUCACAACCACUCACCAUGAGGCCAUUGCUCU  
GUGGAGGACACUGGCUUAGGACUCAUGAAGUAGUACCUCAGGAAGGUGUCUCUGUAAGUGUCCUCCAC  
CAGCUCCAAGACACAAUGAGAUUGGAGAGAACUGGAACAAUCCCUAUGAUUGCAGCUGGAUAUUUUCACA  
UGAACUAUCUAGUAAUGAAGGCAAUGGCAUGUGGUGUGGCAAAGACUGGCCCCAGAUUACAUUUCCAGUC  
CUUUUGUACUGAGGAGGGGCUUUGGGACCAAGACAGUAGGAGUGAGGGUACAGGUUCCACAUCUAUUUC  
UCUCUUAGUUUUCUGUGGUUAUCUUGGUGACUGCAUGGUAAAAGAUGGAGGUGACAAAAGAUGGAAGGAGC  
CUGGAUCCCUGAAUGACUUAUGGUGCAGAGCCUUAACACUACCCCCAACUCAUACUAAAACAGGGGUGGG  
AGGAACAAUAGACCAUUAUUCUGUUAAGGUGCUGAAAUUGUAGAGCUGUUAUUUGAACAGUUAGAGUUU  
CUUAUACUGAUACAGUAUCCUUAACCCUGGAUUGUUGAAAUAAUAGUCCAAAUAGUUUCUUUGCCUAAAA  
CUGUGGACAGAGCCUAAGCAAUAUUGAAUCCAAGACAAGGUAAUUAUUAUCAUCAAUGCUACUCACUAUA  
CAAUACAGAUAAUGUGGCACUUAUCUCCCGUGUUGUUAACCCAGCCUGCUUCUAGUAUUCUUUACACAAA  
AUAACAUUCAUGAGCAACCTGGGCACA

>NR\_146506.1 Homo sapiens long intergenic non-protein coding RNA 1895 (LINC01895), long non-coding RNA  
CATGCGCGGAGCTCACTAGTGGCAGAGCCCACGACACCCGCTCCTCTCCAGCTCTCTCTTTAGGGACAGA  
GAGGAATCTACTTACCAAGATGGCAGGAGCAAGTGGTTATCAGAGCCTGCTCTCTAGAAATACAATTAAA  
CAAGCAGCCCCCTGTCTCTTTTCTCCACTTTCAGTCTTGGGGAAGGGATTGGAATATGTGAGCAGGAGAG  
AAGGGTCATGTTGGAGCAGCCAGGACTCAGAGCCTTTCGCGAGACTGAGTCTGGATCCTTTCCTTCAGCC  
TCCAGGAATACTCCCGGCTCCACACCCAGAATGGTAATCCAGGCAAGGGCTCTGGTGTGTGGCCACACTG  
CCACCTATTACCTGCGGGTCCAAATGCAGTGACTCAACTTCTCTGTGCCTCTCTTTCACATGTATAAAA  
TGAGGATAATGTTGCTATTGTAAGAATTGCATCAATTAATAAACAGCACTCAGTGAAAAAA

RNA

>LINC01895

CAUGCGCGGAGCUCACUAGUGGCAGAGCCCACGACACCCGCUCCUCUCCAGCUCUCUCUUUAGGGACAGA  
GAGGAAUCUACUUACCAAGAUGGCAGGAGCAAGUGGUUAUCAGAGCCUGCUCUCUAGAAAUACAAUAAAA  
CAAGCAGCCCCUGUCUCUUUUUCUCCACUUUCAGUCUUGGGGAAGGGAUUGGAAUAUGUGAGCAGGAGAG  
AAGGGUCAUGUUGGAGCAGCCAGGACUCAGAGCCUUUCCGACAGACUGAGUCUGGAUCCUUUCCUUCAGCC  
UCCAGGAAUACUCCCGGCUCCACACCCAGAAUGGUAAUCCAGGCAAGGGCUCUGGUGUGUGGCCACACUG  
CCACCUAUUACCUUGCGGGUCCAAAUGCAGUGACUCAACUUCUCUGGCCUCUCUUUCCACAUGUAUAAAA  
UGAGGAUAAUGUUGCUAUUGUAAGAAUUGCAUCAAUUAAUAAACAGCACUCAGUGAAAAAA

>XR\_007066389.1 PREDICTED: Homo sapiens long intergenic non-protein coding  
RNA 1897 (LINC01897), ncRNA  
CAGTTGACTTCACCACAGGCCCAGGTCTTGTATTGAGGACAAGGAAATACTGCCCCATAATGCTGTTGAG  
AATATTTAAGAGCAGTCAGGAAACCCCTTGTAGCTTGGCTTTATTGCAGCAAGTGTCAAAGAGGAGGACC  
TGAAC TTCCAAGGCCAACTTGACTGGAAACCCCTCTAGTCTTTAATCCATAGAAACCTGACTTCTGTGCCC  
CCCATGCCTAGAAAAC TACTTTTAAAAAGAACATTAGTGGTCACCACGTTGGTAAAGTATTAATAAATAA  
ACATGTTTTAGTTCTAA

RNA

>LINC01897

CAGUUGACUUCACCACAGGCCCAGGUCUUGUAUUGAGGACAAGGAAAUACUGCCCCAUAAUGCUGUUGAG  
AAUAUUUAAGAGCAGUCAGGAAACCCUUGUAGCUUGGCUUUUAUUGCAGCAAGUGUCAAGAGGAGGACC  
UGAACUUC CAAGGCCAACUUGACUGGAAACCCUCUAGUCUUUAUCCAUAAGAAACCUGACUUCUGUGCCC  
CCCAUGCCUAGAAAACUACUUUUAAAAAGAACAUUAGUGGUCACCACGUUGGUAAAGUAUUAUAAUAAUAA  
ACAUGUUUUAGUUCUAA



>NR\_126324.1 Homo sapiens long intergenic non-protein coding RNA 1899 (LINC01899), long non-coding RNA  
GACTCCTTCATCATCAGGATGCCAGATAATATTTTAAAAGCTGACTCCACCAGAGACCCGATTCTTGAAC  
TTTTAATGCACATTTGGAAATCCCGTGTTTAGTTGGCTTAGATTATAAACTGCAGGAGAACAAGAAGTGT  
ATCAATTATGTTCCAGTTTCTAGGATGTACTCTTCTAGTGGATCCACAAGCAAAAGGGAAGAGGGGAGTG  
TGAAGGCAGAGAAAAATAAAGCACAGCCTATGAAATTATAGCTTGCAGTTTTTGCCAGAATGATGCTCTATT  
AATGCTCAGTGCCTCTTAACTTCTCACTTAAAACCCAATTGGGAAAAATCACCAACTAATAGAGGGCTATT  
CCGTATACTTACTAGAATATATGAGTTTTACAAATTGGAATGATAGGCATTGATATTGACACATCTGGAG  
AAGGAGTGATCAAAAGAGAAGTGGCCCTGGAGCTCTCCCATGAAAAGATTAAATTTTTTAAGAAGATGCTG  
CTCACCTAAAACCTTATCAATAAAAGTCAACTATAGTTTCCAATTGGTAAATCATTGTATGAAAAACAATA  
AAACTATGAAATAAA

RNA

>LINC01899  
GACUCCUUAUCAUCAGGAUGCCAGAUAAUAUUUUAAAAGCUGACUCCACCAGAGACCCGAUUCUUGAAC  
UUUUA AUGCACAUUUGGAAAUCCCGUGUUUAGUUGGCUUAGAUUAUAAACUGCAGGAGAACAAGAAGUGU  
AUCAAUUAUGUUCAGUUUCUAGGAUGUACUCUUCUAGUGGAUCCACAAGCAAAAGGGAAGAGGGGAGUG  
UGAAGGCAGAGAAAAUAAAAGCACAGCCUAUGAAAUUAUAGCUUGCAGUUUUGCCAGAAUGAUGCUCUAUU  
AAUGCUCAGUGCCUCUAAACUUCUCACUUA AAAACCCAAUUGGGA AAAAUACCAACUAAUAGAGGCUAUU  
CCGUUAUCUACUAGAAUAUAUGAGUUUACAAAUUGGAAUGAUAGGCAUUGAUUAUUGACACAUCUGGAG  
AAGGAGUGAUCAAAGAGAAGUGGCCCUUGGAGCUCUCCCCAUGAAAAGAUUAAAUUUUUAAGAAGAUUGCUG  
CUCACCUAAAACUUAUCAUAAAAGUCAACUAUAGUUUCCAAUUGGUAAAUCAUUGUAUGAAAAACAUA  
AAACUAUGAAAUAAA

>XR\_001753529.2 PREDICTED: Homo sapiens long intergenic non-protein coding RNA 1900 (LINC01900), transcript variant X1, ncRNA  
GGCCTACTCATCAGAGCCTCTGGAAGTGGATTGGTATCCCCCTCTGCTCCCAGGAATCCAGTAAAAGTTTG  
CAGAGGATGCAGCAGGTGAGTCCTGTAGACATCAGAGGGGCTTCGACGCTGCACAGCTGCCACTCAGAGG  
GGACACTGCTGGCCTCGATCACATCATGGAGACCACAAGGATGCTGGGAATGCACTTCCCATTGGCCGAG  
CTGAGGATATGAGCAGGCCATGGGCTGGATGGCTCACGCGTTCAGAGGAGGGACAGCGCTTGTTGCAGAG  
AATGAGATTTAGTGTGATGTGTATAAAGGTGTTTCATGGCTAAAGACCAAACAGAGACTAGTGTCTCCCA  
CTCAGGAAGAATAATCACCATGCTAATGGATTAAAATTCTGTTACATAGAA

RNA

>LINC01900

GGCCUACUCAUCAGAGCCUCUGGAAGUGGAUUGGUAUCCCCUCUGCUCCCAGGAUCCAGUAAAAGUUUG  
CAGAGGAUGCAGCAGGUGAGUCCUGUAGACAUCAAGAGGGGUUCGACGCUGCACAGCUGCCACUCAGAGG  
GGACACUGCUGGCCUCGAUCACAUCAUGGAGACCACAAGGAUGCUGGGAAUGCACUCCCCAUUGGCCGAG  
CUGAGGAUAUGAGCAGGCCAUGGGCUGGAUGGCUCACGCGUUCAGAGGAGGGACAGCGCUUGUUGCAGAG  
AAUGAGAUUUAGUGUGAUGUGUAUAAAGGUGUUUCAUGGCUAAAGACCAAACAGAGACUAGUGUCUCCCA  
CUCAGGAAGAAUAAUCACCAUGC UAAUGGAUUAUUUUCUGUUACAUAGAA

>NR\_187474.1 Homo sapiens long intergenic non-protein coding RNA 1901  
(LINC01901), long non-coding RNA

ACCTAATCAAGCCTGGGCAATGGCGGGCGCCCCCCCCAGCCTTGCTGCCGCCTTGCGAGTTTGATCTCAGACTGCT  
GTGCTAGCAATCAGCGAGACTCCGTGGGTGTAGGACCCCTCTGAGCCAGGTGTGGGATATAATCTCGTGGTGCGCCGT  
TTTTTAAGCCCGTCGAAAAAGCGCAGTATTCAGGTATCACCAGCTGTTTATTTCTTCAGACATAGTTAAAATCTAAA  
AGAAAAAAGAAAAAAGTCCAACATTCAGAAATCCCCAAGATGCATACGTAAATCCTAATAGAAAAATGCTCAGTTCA  
AGAAGTTCCATTGAGGTGAAGCAATGATGCAAGGCTTTTGGCAACCGTTCCCCAGCTCCCAGCCACACATCGCTCCA  
CTTACCTTGAGTGACAGCCTCCAAAGAAAAAGTTTCCACCGCGCCAGAGTCTTGACCCTGAGTGGCATCGGCAGGGTC  
TCCTGCGGCAGACCAGGGGTGTTGCGGGCTGCGCTGGGTGGGGGACCGCGCGCTGCACGTGCAGTGCCGCCCGGACG  
GCGGCGAAAGGACAGCGGTGCACCCCCGCCCCGAGGCCCCAGCGATCCATCAGGGCGGCTGTACGCGGGAAGACGCTTC  
ATCTCATCCCTAGATGGCAGCAGGATTCTGAAGCTGGCGCAGCCCTGGGCAGCCCTTTCTGGTCTATTTTCTGAAC  
AGATTGCCAGGGGATACGGCGGCTAAACAGCCAGGCGCCTCCCCGAGCGCAGCTCAGACAGAAGAGCAAGCCGGAC  
AGACGCCGCTGGCGAGGCTTCGGGGGTGAGATCCTGCAGCTTGGACACCACATTCTCTCTTTTGCACACAGATGTG  
CTACTGTGTAATAAAGCAAACAAACAAAAACGGGAGTTTCTGAGCTTCTTGAGAAATGTGTTCATGGTCAAGACCAGTG  
ATTCTGGACGGTGACAAAAGTCTTGGAGGCCTGAGTGCACAGAGGACACACGCACAGATGCACATGAAGTCTATGGAG  
AAACACTGGTCTTCTCTGCCAGGGACCAGGCTGGCCATGCAGGAAGGGAGCAGGATGTGAAGATTCTAGACTTTAGCT  
CCAGCTTCACTACCGTCTCTGCCGTGCACTTTGGGGGA

RNA

>LINC01901

ACCUAAUCAAGCCUGGGCAAUGGCGGGCGCCCCUCCCCCAGCCUUGCUGCCGCCUUGCAGUUUGAUCUCAGACUGCU  
GUGCUAGCAAUCAGCGAGACUCCGUGGGUGUAGGACCCUCUGAGCCAGGUGUGGGGAUAUAUUCUCGUGGUGCGCCGU  
UUUUUAAGCCCGUCGAAAAAGCGCAGUAUUCAGGUUAUACACAGCUGUUUAUUUCUUCAGACAUAGUUAAAAUCUAAA  
AGAAAAAAGAAAAAAGUCCAACAUUCAGAAUCCCAAGAUGCAUACGUAAAUCCUAAUAGAAAAUGCUCAGUUCA  
AGAAGUCCAUUGAGUGAAGCAAUGAUGCAAGGCUUUUGGCAACCGUUCGCCAGCUCCAGCCACACAUCGCUCCA  
CUUACCUUGAGUGACAGCCUCCAAAAGAAAAGUUUCACCGCGCCAGAGUCUUGACCCUGAGUGGCAUCGGCAGGGUC  
UCCUGCGGCAGACCAGGGGUGUUGCGGGCUGCGUGGGUGGGGGACCGCGCGCUGCACGUGCAGUGCCGCCCGGACG  
GCGGCGAAAGGACAGCGGUGCACCCCGCCCCGAGGCCCCAGCGAUCCAUCAGGGCGGCUGUACGCGGGAAGACGCUUC  
AUCUCAUCCCUAGAUGGCAGCAGGAUUCUGAAGCUGGCGCAGCCCUGGGCAGCCCUUUCUGGUCUAUUUUUCUGAAC  
AGAUUGCCAGGGGAUACGGCGGCUAAACAGCCAGGCGCCUCCCCGAGCGCAGCUCAGACAGAAGAGCAAGCCGGAC  
AGACGCCGCUGGCGAGGCUUCGGGGGUCAGAUCCUGCAGCUUGGACACCACAUUCUCUUUUUGCACACAGAUGUG  
CUACUGUGUAAAAUAAGCAAACAAACAAAAACGGGAGUUCAGCUUCUUGGAGAAUGUGUCAUGGUCAAGACCAGUG  
AUUCUGGACGGUGACAAAAGUCCUGGAGGCCUGAGUGCACAGAGGACACACGCACAGAUGCACAUGAACUCAUGGAG  
AAACACUGGUCUUCUCUGCCAGGGACCAGGCUUGGCCAUGCAGGAAGGGAGCAGGAUGUGAAGAUUCAGACUUUAGCU  
CCAGCUUCACUACCGUCCUGCCGUGCACUUUGGGGGA

>NR\_151703.1 Homo sapiens long intergenic non-protein coding RNA 1902 (LINC01902), long non-coding RNA

GCTGGGGCCTCGGGCGGGGTGCACCGCTGTCCTTTCGCCGCCGTCCGGGCGGCACTGCACGTGCAGCGCG  
CGGTCCCCCACCAGCGCAGCCCGCAACCCCCCTGGTCTGCCGAGGAGACCCTGCCGATGCCACTCAGG  
GTCAAGACTCTGGCGCGGTGGAACCTGCAGAGCAAAAGGAAACACAGACAAAAACAGTGAGAAGGAGAGA  
GAGCATGTGGGGCTTTGCCAGAGAGGAACTTGGATGGCAATCACCTAAGAACCTCAAACCTCAGTGGCCAGG  
GCAGACTGGTGTCTATTTTGCAATGTCTTCCAGTAGTTGATAAATTTCTACTTTTAAAAATAATTGGAAGA  
ATGTAAGCTCTCAACTAGTCCACTAGTCCCGAAACAATAGATACCAGCTGGCAGAGATAATAGCTGTCTG  
GAAGAGAGAGATACATACCACATCAAAAAACAACAAAAAAGGATGGCTCAAGTACTCAAAGGCAGCAC  
TAAAAATAAGGCTATGTCTCTTCTGAGAATACTCTGGACTTCATTCTCTGATTAAAGATCACAACCTGCTT  
CTTCGTTGAGGAAATCATGTATTTCAAAGCCACCAATGAACAAGGTAATGGGATGTATTGGTCCAGCACT  
GATAACAGGTTATCCTACAATCAAGTATACTCTTTCCAGAAAGCTGAGTTAGGTATGCAACTGCCTTTCT  
AAGCCATGACTACATTGCTAAATGAATCATTGATTTGGAAAATCTGAAGTGACCTTCAGCTTGTCTCCA  
GCTCTTCTCAACAGAAAAGAGAGGCAAAATCAGCAAAATATTGGAAAGAGATTTTAACTGAATGGAAA  
AGACAATATGAGGGTGATGAAAGACTCTAGATGGTCCGTCTTGGAGAGAAGGTTTTGCCGTCTTGCCCCA  
GTTGGTCTCGAACTCCCGGGCTCAAGCAATCCACCTGCCTTGGCCTCCCAAAGTGCTGGGATTACAGACA  
CCAGTAATGAGGTGTCTCCTGGCACACAATCACAATGCACTGACAAACCATCTTGGTGTGTGAAAAAGAC  
TCAGAAAAATCCAAGCAATGTGACACTACTAGCAAGCATAGTTCCACTTCACCAGAGACTTCAGGTCATA  
GTTGGGCCCTAAGGCAGAGTCGCTTGGCTGGAGAACTCATTATTTATAGGACTATAGACCAAGTTTCATGT  
CTGAGAGGCTCTTACGTTATTACATAGAAAACAAAATTTTGTATCTATAAGAATGATTTGCGTCTTTCTC  
CTTACGTTAGTAATCCTAAGAAAAATATTGAAAATGAATCATTCTTTAAACAATTTAAACAATTTACTGAT  
TATTTTACCACCTATATGATGCACATGTGCCTACCAAGAAATCAGATATTTTCTTGTGTGTAGCTTCATT  
CAATAGAGTAAAAATAGAAAACCTTTTATTATTAATAAAAAATGTGAAATTCATGTCAATATATGATGTA  
TAATCTTCTATGCTTCATTGTGTCTATCCTTTAGCATCACCATTGACTGACTTCAAGATACACTTTCCC  
CTTACATAGCTGTGCTAGTTGTCTACAGGTAATAATTTAAAGCATAAAAATACAGTCTCTGACTCTGTGCTT  
TAACTTAATCCAGTTGGAGAAAAAGAAATATGTGTAAAAAGATGAAAAATTTATGGAATTTAATAAAATCTA  
ATTCCAAATGGAAAAATATAGGCAAGAAAATATGATAAGACATCAATACCTGAGAACAAAGATTACCATTTGGA  
GAGGGTAGACCAGGTGCAGTTTTTCTATGACTAGTAGACTCCGAAAGAAGGGAATTTCAAACAAGAAGGT  
ATGTGGAAGAAGCAGTATATTTTAAACCCCTCAACTCTTGTGTAGAAAAACAAACATCCTCTGAGGACTTC  
CTCATAGGTAGCAATATGATAAGCAATAATGCTCTGCATCAGGAATGAAATTAGGTATTTAAAGGAGGGAA  
GATCTAACAAGTAGAAGTTATAATTACAGACCTTGAAACTCATGTTCTAGATCAGCGGTCTCCACCCTTT  
TTGGCACTAGGGACCAGTTTTTGTGGAAGACAGTTTTTCCACGGACCAGGGTAGGAGATGCTTTTGGGATG  
ATTACGGCACATTACATTTATTGTGCACTTTATTTCTATTATTATTACATTGTAATATATAATGAAATAA  
TTATACAACCTCACTATAAAAAATAGAATCACTGGGAGCCCTGAGCTTGTTTTCTGCAACTAGATGGTCCCA  
TATGGGGATGATGGGAGACAGTGACAGATCATCAAGCATTAGATGCTCATAAGAAGCAAGGAACCTGAGAT  
CCTTGCAACCTAGATCCATTGCATGTGTGGTTCACAATAGGTTTTGCACTCCTGTGGGAATCTAATGCCA  
CTGCTGATCTGACAAGAGGCGGAGCTTAGGTGGTAATGTGTCTGGAATAACAGATGACGCTTTGCTCACT  
CACCTGCTGCTTACCTCCTGCTGCGTAGCCTGGTTATAAACAGGCCATGAACTGGTACTGGTCTGTGGCC  
TAGGGGTTGGGGCTCCTGTTCTAGATTTTTTAGAGAAGACTACCATGTAAAATGATAGTGAATAATTAT  
TAATATTAATAATATAATAGGTCTAATTGCTAAATCATATATCATAAAATCTAGCCTTTATGATAATTTA  
CCTTTTAAACAGTCAATAAAAACTGGAACAACTAGTAGGGTATCACAGCGGTGATAGGCTTAACTTGC  
ATAATATTTGAATTTATAGAGAGAATAAATACCACATTGAAGTAAAGCACAAAAATAAGCCATGAAGTCAG  
TACTCGGTATTGCATGTTCTGTGAGACAGTGAAGAATTTAATTCAATTACAGACATGCCATAGGGAATAAT  
GATTTACCAAACTTTATCGAGTTAAGTGATAAAAAAGTGTTATGTTAGGTAGATTAAATCAAGGGTAGTGGT  
TCCATTCTTTGGTTTTTATAGTGCTAGGAAGGCTGTGGAATAAAAGTTGCATGTAGCTCCACATACACACT  
GAAACATGTATCTACCAAGCAATAAACATACTTTCAACATGTTTCTTTTAAATATGTATAAATAGGCCAG  
GCGTGGTGGCTCACACCTGTAATCCCAATAAATTTGGGAGGATGAGGCTGGTGAATCACTTGAATTGAGGA  
GTTTAAGAGCAGTCTGGGCAACATGGTGAAATCCTGTTTCTACAAAAAATACCCCCAAAATGCTTATA  
AATATGACTACTACAATAAAAAATAAATTTAATGAATATAAATTTATTGTAATAGGCCATTCTATATTTTTT  
CAGTCAACAGATGTGATTATATCTTACACTGGGAGATGCCTACCTGTCTCGTCTCCTCTCCTTTCCCTCT  
CCTCTCCTCTCCTCTCCTTTCCCTTTTCCCTTCTTTTCTTCCCTCCTCTCCCTCTCCTTTCCCTTCTCC  
TTCCCTTCCCTTCCCTTCCCTTCCCTTCCCTTCCCTTCCCTTCCCTTCCCTTCCCTTCCCTTCCCTTCCCT  
CTCACTGCAACATCCACCTCCCTGGTCCAAGCAATTTCTCCACCTCAGCCTCCCTAGTAGCTGGGATTAC  
AGGCGCACCAACCATCTGGCTAATTTTTGTATTTTTTAGTAGAGACAGGGTTTCACCATGTTGGCCAGG  
CTGGTCCCGAACTCCTGATCTCAGGTGATCTACCTCTTTGGCCCTCCCAAAGTGCTAGGATTACAGGCGT  
GAGCCACCACGCCCCACTTTAATTTTGTATTTTTTAGTAGAGACGGGGTTTCACCATGTTGGCAAGGCTGA  
TCTCTAACTCCTGACCTTGTGATCTGCCCATCTATGCCTCCCAAAGTGTGAGATCACAGGCGCGAGCCA  
CCGCGCCACGCTCCTCTCCTCTCCTCTCCTTTCCCTTTTCCCTTTTCCCTTTTCCCTTTTCCCTTTTCCCT  
CCTCCCTCCCTTTCCCTTTCCCATCCCCCTCCTGTTCCCTTTCTTTCCCTTTTCCCTTTTCCCTTTTCCCT  
TATTATTTTTCATTAAAGTGCTGTCTAGGGCTGGGCGAGATGGATCATGCCATATAATCCAGCACTTTGTTA  
GGCAGAATCAGGCAGCTCACCTGAGGTCAAAAAGTTCGAGACCAGCCTGGCCAACATTGCAAAACCCCGTC  
TCTACTAAAGAATACAAAAATAGTGAGGTGTGGTGGCATGTGACTGTAATCTCAGCTACTCAGGAGGCT  
GAGGTAGGAGAATTGCTTGAACCCAGGAGGCGAAGTCTGCAGTGAGCCGAGAAGCTCGCCACTGTACTCCA  
GCCTGGGAGACAGAGTGAGACTCCATCTCAAAAACAAAACAAAAACAAAAACAAAAACAAAAACAAAAAC

AAACAAAAAATTGCTGCTAGCCAGGCATAGTGACATGCACCTGTAGTTGTAGCTATTTGGAGGCTGAGG  
TCAGAGGAAAAGCTTGAGGCCAGAAGTTTGTAGACCAATCTGGGCAACAAAGCAAGATCCCATCTCTAAAAT  
ACAAAAACAAACAAACAAACCAACATGCTGCCAACTTACATTGACATATGCTTTTTTAATTATCAAATATA  
AAATGTACAGACTAAATGCTCAATATATTTTCATTTGTGTTGTTTGTATTGGTTTACTGAGTTATGCTA  
A

RNA

>LINC01902

GCUGGGGCCUCGGGCGGGGUGCACC CGCUGUCCUUUCGCCGCCGUCGGGGCGGCACUGCACGUGCAGCGCG  
CGGUCCCCCACCAGCGCAGCCCGCAACACCCCUGGUCUGCCGCAGGAGACCCUGCCGAUGCCACUCAGG  
GUCAAGACUCUGGCGCGGUGGAAAACUGCAGAGCAAAAGGAAACACAGACAAAAACAGUGAGAAGGAGAGA  
GAGCAUGUGGGGCUUUGCCAGAGAGGAACUUGGAUGGC AAUCACCUAAGAACUCCAAACUCAGUGCCAGG  
GCAGACUGGUGUCUAUUUUGCAAUGUCUUC CAGUAGUUGAUAAACUUUCUACUUUAAAAUAAUUGGAAGA  
AUGUAAGCUCUCAACUAGUCCACUAGUCCCGAAAACAAUAGAUACCAGCUGGCAGAGAUAAUAGCUGUCUG  
GAAGAGAGAGAUACAUAACCAUCAAAAAACAACAAAAAAGGAUGGCUCAAGUACUCAAAAGGCAGCAC  
UAAAAUAAGGCUAUGUCUCUUCUGAGAAUACUCUGGACUUC AUUCUCUGAUUAAAGAUACAACUGCUU  
CUUCGUUGAGGAAAUCAUGUAUUUCAAAGCCACCAAUGAACAAGGUAAUGGGGAUGUAUUGGUCCAGCACU  
GAUAAACAGGUUAUCCUACAUA CAAGUAUACUCUUUC CAGAAAAGCUGAGUUAAGGUUAUGCAACUGCCUUUCU  
AAGCCAUGACUACA UUGCUAAAUGAAUCAUUGAUUUGGAAAUCUGAAGUGACC UUCAGCUUGUUCUCCA  
GCUCUUCUCAACAGAAAAGAGAGGC AAAAU CAGCAAAUAUUGGAAAAGAGAUUUUAACCUGAAUGGAAA  
AGACAAUAUGAGGGUGAU GAAAGACUCUAGAUGGUCCGUCUUGGAGAGAAGGUUUUGCCGUCUUGCCCCA  
GUUGGUCUCGAACUCCCGGGCUC AAGCAAUCCACCUGCCUUGGCCUCCCAAAGUGCUGGGAUUACAGACA  
CCAGUAAUGAGGUGUCUCCUGGCACACAAUCACAAUGCACUGACAAAACCAUCUUGGUGUGUGAAAAAGAC  
UCAGAAAAAUCCAAGCAAUGUGACACUACUAGCAAGCAUAGUUC CACUUCACCAGAGACUUCAGGUCAU  
GUUGGGCCUAAGGCAGAGUCGCUUGGCUGGAGAAUGCAUUUAUUUAUAGGACUAUAGACCAAGUUUCAUGU  
CUGAGAGGCUCUUA CGUUAUUA CAUAGAAA CAAAAUUUUGUUUAUCUAUAAGAAUGAUUUGCGUCUUUCUC  
CUUACGUUAGUAAUCCUAAGAAAAUAUUGAAAAUGAAUCAUUCUUUA AAAACAAUUAACAAUUAACUGAU  
UAUUUUCACCACUAUAUGAUGCACAUGUGCCUACCAAGAAAUCAGAUAUUUUCUUGUGUGUAGCUUCAUU  
CAAUAGAGUAAAAUAGAAAACUUUUAUUAUUAUAAAAAUGUGAAAUCCAUGUCAUAUACUAUGAUGUA  
UAAUCUUCUAUGCUUCAUUGUGUCUAUCCUUUAGCAUCACCAUUGACUGACUUC AAGAGUACACUUUCCC  
CUUACAUAGCUGUGCUAGUUGCUACAGGUAAUAUUUAAAAGCAUAAAUAACAGUCUCUGACUCUGUGCUU  
UAACUUAAUCCAGUUGGAGAAACAGAAUAUGUGUAAAAAGAU GAAAAAUUAUGGAAUUUAUAAAAUCUA  
AUUCCAAAUGGAAAAUAUAGGCAAGAAAUAUGAUAAAGACAUCAAUACCUGAGAACAAGAUUACCAUUGGA  
GAGGGUAGACCAGGUGCAGUUUUUCUAUGACUAGUAGACUCCGAAAAGAAGGGAAUUCUAAAACAAGAAGGU  
AUGUGGAAGAAGCAGUAUAUUUUAAAACCCUCAACUCUUGUUAGAAAAACAAACAUCCUCUGAGGACUUC  
CUCAUAGGUAGCAAUAUGAUAAAGCAAUAAGUCUCUGCAUCAGGAAUGAAAUAGGUUAUAAAGGAGGGAA  
GAUCUAACAAGUAGAAGUUAUAUUACAGACC UUGAAAUCUAUGUUCUAGAU CAGCGGUCUCCACCCUUU  
UUGGCACUAGGGACCAGUUUUGUGGAAGACAGUUUUCCACGGACCAGGGUAGGAGAUUCUUUGGGAUG  
AUUCAGGCACAUUA CAUUUAUUGUGCACUUUAUUUCUAUUUAUUUA CAUUGUAUAUAUAAUGAAAAUA  
UUUAUACAACUCACUAUAAAAUAGAAUCACUGGGGAGCCUGAGCUUGUUUUCCUGCAACUAGAUGGUCCCA  
UAUGGGGAUGAUGGAGACAGUGACAGAUCAUCAAGCAUUAAGAUGCACUAAGAAGCAAGGAACUGAGAU  
CCUUGCAACCUAGAUAUCCAUUGCAUGUGGUUCCACAAUAGGUUUUUGCACUCCUGUGGGAAUCUAAUGCCA  
CUGCUGAUUCUGACAAGAGGCGGAGCUUAGGUGGUAAUGUGUCUGGAAAUACAGAUAGACGCUUUGCUCACU  
CACCUGCUGCUUACCUCUCCUGCUGCGUAGCCUGGUUAUAAACAGGCCAUGAACUGGUACUGGUUCUGUGGCC  
UAGGGGUUGGGGGCUCUUGUUCUAGAUUUUUUAGAGAAGACUACCAUGUAAAAUGAUAGUGAAUAAUUAU  
UAAUAUUAUAAUAUAAUAGGUCUAAUUGCUAAAUCAUAUAUCAUAAAAUCUAGCCUUUAUGAUAAUUUA  
CCUUUUAAAACAGUCAAUAAAAACUGGAACAAUCUAGUAGGGUAUCACAGCGGUGAUAGGUCUUAACUUGC  
AUAAUAUUUGAAUUUAUAGAGAGAAUAAAUAACCAAUUGAAGUAAAGCACAAAUAAGCCAUGAAGUCAG  
UACUCGGUAUUGCAUGUUCGUGAGACAGUGAAGAAUUUAUUCAAUUACAGACAUGCCAUAGGGAAUAAU  
GAUUUACCAAACUUUAUCGAGUUAAGUGAUAAAAGUGUUUAUGUUAGGUAGAUUAAUCAAGGGUAGUGGU  
UCCAUUUUUGGUUUUUAGAUGCUAGGAAGGCUGUGGAAUAAAAGUUGCAUGUAGCUCCACAUACACACU  
GAAACAUGUAUCUACCAAGCAAUAAA CAUACUUUCAAUGUUUCCUUUAAAUAUGUAUAAAUAAGGCCAG  
GCGUGGUGGCUCACACCUGUAAUCCCAAUAAUUUGGGAGGAUGAGGCUGGUGAAUCACUUGAAUUGAGGA  
GUUUAAGAGCAGUCUGGGCAACAUUGGUGAAAUCCUGUUUCUACAAAAAAUAACCCCCAAAUGCUUAUA  
AAUAUGACUACUACAUAUAAAAUAAAUUUAUGAAUAUAUUUAUUGUAUAAGGCCAUUCUAUAUUUUUU  
CAGUCAACAGAUUGAUUAUUAUCUUAACUUGGAGAUGCCUACCUGUCUCGUCUCCUCUCCCUUCCUCCUCU  
CCUCUCCUCUCCUCUCCUUUCCUUUUCCCUUUCUUUUUCCCUCCUCUCCCUUCCCUUCCCUUCCCUCCU  
UUCCCUUCCCUUCCCUUCCCUUCCCUUCCCUUCCCUUCCCUUCCCUUCCCUUCCCUUCCCUUCCCUUCCCU  
CUCACUGCAACAACUCCACCUCCUGUCCAGCAAGCAUUCUCCACCUCCAGCCUCCCUAGUAGCUGGGAUUAC  
AGGCGCACCAACCACAUCUGGCUAUUUUUUGUAUUUUUUAUGUAGAGACAGGGUUUACCAUGUUGGCCAGG  
CUGGUCCCCGAACUCCUGAUUCUAGGUUAUCUACCCUCUUUGGCCUCCCAAAGUGCUAGGAUUAACAGGCGU  
GAGCCACCACGCCCCACUUUAAUUUUUGUAUUUUUUAUGUAGAGACGGGGUUUACCAUGUUGGCAAGGCUGA  
UCUCUAACUCCUGACC UUGUGAUUCUGCCAUCUAUGCCUCCCAAAGUGUUGAGAU CACAGGCGCGAGCCA  
CCGCGCCCAGCCUCCUCUCCUCUCCUCUCCUUUCCUUUCCGCUUUUCCCUUCCCUUCCCUUCCCUUCCCUUCCCUU

CCUCCCUCCCCUCCCCUUCUCCAUCCCCCUCCUGUUCCCUUCUUCCUUUGGCCUUUGUGAAGUAUCUAUA  
UAUUUAUUUUAUUAAAAGUGCUGUCAGGGCUGGGCGAGAUUGGAUCAUGCCUAUAAUCCCAGCACUUUGUUA  
GGCAGAAUCAGGCAGCUCACCUAGAGGUCAAAAAGUUCGAGACCAGCCUGGCCAACAUUGCAAAACCCCGUC  
UCUACUAAAAGAAUACAAAAAUAGUGGAGUGUGGUGGCAUGUGACUGUAAUCUCAGCUACUCAGGAGGCU  
GAGGUAGGAGAAUUGCUGAACCAGGAGGCGAAGUCUGCAGUGAGCCGAGAACUCGCCACUGUACUCCA  
GCCUGGGAGACAGAGUGAGACUCCAUCUAAAAACAAAACAAAACAAAACAAAACAAAACAAAACAAAAC  
AAACAAAAAAAUUGCUGCUAGCCAGGCAUAGUGACAUGCACCUGUAGUUGUAGCUAUUUUGGAGGCUGAGG  
UCAGAGGAAAAGCUUGAGGCCAGAAGUUUGAGACCAAUCUGGGCAACAAAGCAAGAUCCEAUCUCUAAAAU  
ACAAAAACAAAACAAAACAAACCAUGCUGCCAACUUACAUGACAUAUGCUUUUUAAUUUAUCAAUAUA  
AAAUGUACAGACUAAAUGCUCAAUAUAUUUUAUUUGUGUUGUUGUUAUUGGUUUACUGAGUUUAUGCUA  
A

>NR\_146471.1 Homo sapiens long intergenic non-protein coding RNA 1903 (LINC01903), long non-coding RNA  
GGTTCACGCTCCTGCCTCAGCCTCCCGAGTAGCTGGAACACAGGCGCCCGCCACCACGCCCAGCTAATT  
TTTGTATTTTCAGTAGAGACAGGATTTTCATTGTGTTAGCCGGGATGGTCTCGATCTCCTGACCTCGTGAT  
CCACCCGCCTCGGCCTCCCAAAGTGCTGGGATTACAGGCGTGAGCCACCACACCCCGCCACTTCAAATAC  
TCTTTAACTTTACACTTAAGCAAAGAAATATTACATATTTTCAAGTCTTGTGAAATGTCCCTTTATATACAAAATATTTCCA  
AGACCTATGACATAGGATATATTAATATTTAAGTTTTGGAAATGTCCCTTTATATACAAAATATTTCCA  
TTGTTAACAAGTGCTTTTCAAAAAATATTTTATTATACCTTAGAAAAGAGCCAATTTAGGGTCTACACTA  
TCTTTGTTTCATCTCGTTTTCTTTTTTGCACATATTCCTTTACTAATGTAGATTAGCATTACAAGATAAAA  
AGTATCCAGCATCATAACATTGTAATTAATTCCTCCCATATCAAATTATATGAAAAATCCACCTCAGACA  
CTCTGCCAAAGGGTATGGAACATTTAATCAAGATGAAGTGCTTCAATTGAAGCAGTATATGCTCACCTCT  
ATCAGTAATTTTGTCTCACTTTATTTCAAAGTATTATTATTTTTTCGTCCCAAGATTTTAGTAACACGTTG  
TGTTAAATTCTTGTCTATATTTAAATTAACCTCTTATTCTGATTATATTTAAAGCAAATTTTCATTG  
TTTCAATGAAATCGTTCAGTATACTCGGCAAAGTTTATAGTAAAGTTCGAACAATAAATACATTCTGAA  
ATGTCCTGTGCTTTCAAAGTACATATTAGAGCTGATGGCTTAAGCACCATTATTTAGTGGCATTCTTAA  
TTATTACTTTCTTTATGTGGTTTTTTTTTAAGAGGCACCAAAGTTCCTTTTGTACATGGCTCGTGTGTC  
CTTCAGTAACAGCCACTTGAATTTGCCCTTAGTTGCAAACCTCAGATCATGACACAAAATATACTCATAAA  
AGAACTTTATTCTGGACATTCTTCCAGACTATGGAAATGATGTTAGACAAAAGCAAACCTTGAGCGATTT  
TCTCATTCGAGTTCAAATGGGTCTATAAAGCAGTGGAGACAATTCGCAATATGAACAACACATTTGGCCC  
AGGGACTGTTAATGAAGGTACAGTGCGGGGGCGGTTTCGAGAAGTTTTGCAAAAGAGATGAGACCTTGAA  
GACGAGGAGCATAATGGTTGGTTCACAGGAAGTTGACAACAACCGAGAGCAATCATTGAAGCTGATCCTCT  
CACAACACCACAAGAAGTTGCAGAACTCATTGTTGACCATTCCACAGTCAATTCGGCCTTTGAAGCAAAT  
GGGAAGGTGAGAACTCTAGATAAGTGGGATGCCCCATGAGCTGAGCCAAAATAAAATAAAAGTCAATTT  
TGAAGTGTGATCTTCTTATTCTATGCAACAACAATGAAACACTTTTCTATTGGATTGTGATGTGCGAC  
GAAATGTAGATTTTATAGGACAACCAGTGATGACCAGCTGAATAACTGGATCCAGAAGAAGCTCCAAAGC  
ACTTCCCAAAGCCAAACTTGCACCAAATAAAAGGTCTCGTCAATTTGTTGGGTGCTCTGCTGCCAGCCTAA  
TTTACTACAGCTTTCTGAATCCTAATGAACTATTACATCTGAGACGTATGCTCAGCAAATCGATGAGAT  
GTCTGAAAACCTGCAATGCCTGCAGCCGACACTGGTCCACAGAAAAAGCCCAATTTATCCCCACAACCTAC  
ACGTGACCGCATGTAGCACAACCAATGCATCAAAGTCGAACAAATTTGGGCTACAAATTTTTGCTCGTC  
CACTTTATTACCTGACCTCTCACCAACTGACCTCCCAACTCTCTGCCACTTCTTCAAGCATCTCGCCAA  
CTTTTGTCAAGGAAAAAGCTTCCACAACCTAGTAGGAGGCAGAAAATGCTTTCCAAGAGTTCATCGAATCC  
TGAAGCACGTATTTTCTTTTATGCCATGGAAATAAACAACTTATTTTCTTTCTTTGGCAAAAATGTG  
TTGATTGTAATGGTTTCTATTTTGATTAAATAAAGATGTATTTGTGCC

RNA

>LINC01903

GGUUCACGCUCCUGCCUCAGCCUCCCGAGUAGCUGGAACUACAGGCGCCCGCCACCACGCCCAGCUAAUU  
UUUGUAUUUUCAGUAGAGACAGGAUUUCAUUGUGUAGCCGGGAUGGUCUCGAUCUCCUGACCUCUGAU  
CCACCCGCCTCGGCCTCCCAAAGUGCUGGGAUUACAGGCGUGAGCCACCACACCCCGCCACUUCAAAUAU  
UCUUUAACUUUACACUUAAGCAAAGAAAUAUUACAUAUUUCAGUCCUGAAAAUAUUAUGAUAAAUAUUA  
AGACCCUAUGACAUAGGAUAUAUUAAAUAUUUAGUUUUUGGAAAUUGCCUUUAUAUACAAAUAUUUCCA  
UUGUUACAAGUGCUUUUCAAATAAAUAUUUUUAUUUUAUACCUUAGAAAGAGCCAAUUUAGGGUCUACACUA  
UCUUUGUUCAUUCUGUUUUUUUUUGCACAUAUUCUUUUAUUAUGUAGAUUAGCACAUAAGAUAUAAA  
AGUAUCCAGCAUCAUAACAUAUUGUAAUUAUUUUUUUUUUUUUUUUUUUUUUUUUUUUUUUUUUUUUUUU  
CUCUGCCAAAGGGUAUGGAACAUAUUUAUUAAGAUGAAGUGCUUCAUUGAAGCAGUAUAUGCUCACCUCU  
AUCAGUAAUUUUGUCUCACUUAUUAUUAAGUAUUAUUAUUUUUUGUCCCAAGAUUUUAGUAACACGUUG  
UGUUAAAUAUUCUGUCAUAUUUAAAUAUUAACCCUCUUAUUCGUAUUAUUAUUUUAAAAGCAAUUUUCAUUG  
UUUCAUAGAAUUCGUUCAGUAUACUCGGCAAAGUUUAUAGUAAAGUUCUGAACAAUAAUAUUAUUCUGAA  
AUGUCCUGUGCUUUCAAAGUACAUAUUAAGAGCUGAUGGCUUAAGCACCAUUAUUUAGUGGCAUUUCUAA  
UUAUUACUUUCCUUUAUGUGGUUUUUUUUAAGAGGCACCAAAGUCCUUUUGUCACAUGGCUCUGUUGC  
CUUCAGUAAACAGCCACUUGAAUUUGCCCUUAGUUGCAAACUCAGAUCAUGACACAAAUAUACUCAUAAA  
AGAACUUUAUUCUGGACAUUCUUCAGACUAUGGAAUUGAUGUUAGACAAAAGCAAACUUGAGCGAUUU  
UCUCAUUCGAGUUCAAAAUGGGUCAUAAAAGCAGUGGAGACAAUUCGAAUAUGAACAAACAUUUGGCCC  
AGGGACUGUUAUAGAAAGGUACAGUGCGGGGGCGGUUCGAGAAGUUUUGCAAAAGAGAUAGACCCUUGAA  
GACGAGGAGCAUAAUGGUUGGUCACAGGAAGUUGACAACAACCGAGAGCAUUAUGAAGCUGAUCCUCU  
CACAACACCACAAGAAGUUGCAGAACUCAUUGUUGACCAUUCACAGUCAUUCGGCCUUUGAAGCAAUU  
GGGAAGGUGAGAACUCUAGAUAAUGUGGAUGCCCCAUGAGCUGAGCCAAAUAUAAUAAAAGUCAUUU  
UGAAGUGUCAUCUUUCUUAUUCUAUGCAACAACAAGAAACACUUUUUAUUGGAUUGAUGUGGCGAC  
GAAAUGAGAUUUUAUAGGACAACCAGUGAUGAUGAUGAUAACUGGAUCCAGAAGAAGCUCACAAAGC  
ACUUCCTCAAAGCCAAACUUGCACCAAUAAAAGGUCAUCGUCAUUGUUGGGUGCUCUGCUGCCAGCCUAA  
UUUACUACAGCUUUUGAAUCCUAAUGAAAUAUUAUUAUUCUGAGACGUAUGCUCAGCAAUUGAUGAGAU  
GUCCUGAAAAUGCAAUGCCUGCAGCCGACACUGGUCCACAGAAAAAGCCCAUUAUUCCTCCACAACUAC  
ACGUGACCGCAUGUAGCACAACCAUUGCAUCAAAGUCCGAACAAAUUGGGCUACAAAUUUUUGCCUCGUC  
CACUUUAUUCACCUGACCUCUCACCAACUGACCUCCTCAACUCUCUGCCACUUCUUAAGCAUCUGCCAA

CUUUUUGCAAGGAAAAAGCUUCCACAACUAGUAGGAGGCAGAAAAUGCUUCCAAGAGUUCAUCGAAUCC  
UGAAGCACGUAUUUUUUUUUUAUGCCAUGGAAAUAAACAAACUUAUUUUCUUUCUUUGGCAAAAAUGUG  
UUGAUUGUAAUGGUUCCUAUUUUGAUUAAUAAAGAUGUAUUUGUGCC



>NR\_146724.1 Homo sapiens long intergenic non-protein coding RNA 1904 (LINC01904), long non-coding RNA  
AACATGTGAGCTCCTTGAGGGTAATCCCTCTCTCCCTGGTAGCCCTAGTACTGCCTTCAGGCAGATATCC  
ACAAAAGCACCTTGACACAGAAACATCTTTGAGCTATTTTAAGAGGCAGCATTATTTTACTGACAAATGTT  
CAGAAATTGAGCTCTCTGACTTGCCCCAGCCCAACCTCTATGGATTGACCATTCTCCTCAGAGAGACTGT  
GTATGCCTGTGCAGGCACACATGTTGAGGGGAAGACAGGAAGACCTACCCCTCCCCCAGGCCCTGGCTTCT  
CTTCAGACAGTGCCATTACACTGAGCCTCACAGGCAAGTACTGCCTGGTGTAACTTGGGGAGTGATGGG  
GCCTGCTGACCAGAATCACTCCTCCAAAAGCTTCACACACAAGCCTGAGTTTCCAGTCATCACCAGCAGC  
ACCTTCAGTCTTTGAGAGCCTTCTTAATGAACACACATATTTTACCTGGATCAAGACACTGTGTTATCTG  
GCAAAGGTTGCCCATTTAAATGAGTGACTGGAAAGGTTTCGTTTATCTGGTCAACCTCTACTGCCCCC  
TATTGTCACCCCCTTTGGGATTAGAATCCTGAAAGAAATGATGAGAAGAAAGGCTACATATGGAGAGACCTG  
AGAAACCCGAATCTTTCTTGAGAGGAGGAAAATCAGACACCTGCACAGTCCAGCAGCCTGATCCCAGGAG  
CCAGGGAGCAGGGAGCAGAGGAGAGTTCCAGGGACCAGAAGCCAGGAAGTGGGATTAAAGGCTAACACTG  
GCCACACAAGACGGACCGCTGCACAGGAATTTACAGTTCACAGAGCACTTTTTTCATCTCCTTAAATCTC  
ATAAAATCGCAGTGAATTGAGAAAAAAAAAAAAAAAAAAAAAAAAAAAAAAAAA

RNA

>LINC01904

AACAUGUGAGCUCUUGAGGGUAAUCCCUUCUCCCCUGGUAGCCCUAGUACUGCCUUCAGGCAGAUAUCC  
ACAAAAGCACCUUGCACAGAAACAUCUUGAGCUAUUUUAAGAGGCAGCAUUAUUUUACUGACAAUGUU  
CAGAAUUGAGCUCUCUGACUUGCCCCAGCCCAACCUCUAUGGAUUGACCAUUCUCCUCAGAGAGACUGU  
GUAUGCCUGUGCAGGCACACAUGUUGAGGGGAAGACAGGAAGACCUACCCUCCCCCAGGCCCUUGCUUCU  
CUUCAGACAGUGCCAUUCACACUGAGCCUCACAGGCAAGUACUGCCUGGUGUAACUUGGGGAGUGAUGGG  
GCCUGCUGACCAGAAUCACUCCUCCAAAAGCUUCACACACAAGCCUGAGUUUCCAGUCAUCACCAGCAGC  
ACCUUCAGUCUUUGAGAGCCUUCUAAUGAACACACAUAUUUUACCUGGAUCAAGACACUGUGUUAUCUG  
GCAAAGGUUGCCCAUUUAAAAUGAGUGACUGGAAAGGUUCGUUUUACUGGUCAACCCUCUACUGCCCCC  
UAUUGUCACCCCUUUGGGAUUAGAAUCCUGAAAGAAUGAUGAGAAGAAAGGCUACAUAUGGAGAGACCUG  
AGAAACCCGAAUCUUUCUUGAGAGGAGGAAAUCAGACACCUGCACAGUCCAGCAGCCUGAUCCCAGGAG  
CCAGGGAGCAGGGAGCAGAGGAGAGUUCAGGGACCAGAAGCCAGGAAGUGGGAUUAAGGCUAACACUG  
GCCACACAAGACGGACCGCUGCACAGGAUUUACAGUUCACAGAGCACUUUUUCAUCUCCUAAAAUCUC  
AUAAAAUCGCAGUGAAUUGAGAAAAAAAAAAAAAAAAAAAAAAAAAAAAAAAAA

>NR\_146510.1 Homo sapiens long intergenic non-protein coding RNA 1905 (LINC01905), transcript variant 1, long non-coding RNA  
TGATGCAGCAAGAAGGCCCTTGCCAGATGCCAGCAACTTGATATTGAACTTCTCATCCTCCAGAATGGTT  
TGTTTTTCTCTCTGTGCATACCTCAAGAGGAACACAAAGAGTGATGGCCTGTCACTCTGATGCCTCTCTC  
TACTCAAATGGCAGAAACCAACCAGGTTCTGTCAATAGAAGATACTAAAGAAAGAAAGCCAGGAGAAGAA  
AAGGGACTTCTTTCTTCAAGGTCTAAGCTGTTCTAATAGCATTATTCTGGGAATGGCATCTTCCACTCCT  
CCTAGTACAAAGAACCTGCTTCCTCATACCCCGTCAAGGAACTGCAGCATCCAGGTGATGGCCACAGTGG  
CAGAACCTAGGAAGCCAAGAAGAAACCAGAGAATGGAGACACATGGCAGCAATGGCAAGTCATCAGACCC  
AGGATTTCCCAAAGAACACTGGTCCAGGAAGATGCTCTGTGAAAAAGTGTTCCCTGGTCGGAGAAATTTG  
TGAAACACTTTGCATAATACTTAAAAGAATGTATGGCACATCAAAGGTAATATGCAATAAAAGAATTCAT  
TTTTTTAAAACCAAG

RNA

>LINC01905

UGAUGCAGCAAGAAGGCCCUUGCCAGAUGCCAGCAACUUGAUUAUUGAACUUCUCAUCCUCCAGAAUGGUU  
UGUUUUUCCUCUCUGUCAUACCUCAAGAGGAACACAAAGAGUGAUGGCCUGUCACUCUGAUGCCUCUCUC  
UACUCAAAUUGGCAGAAACCAACCAGGUUCUGUCAAUAGAAGAUACUAAAGAAAGAAAGCCAGGAGAAGAA  
AAGGGACUUCUUUCUUAAGGUCUAAGCUGUUCUAAUAGCAUUAUUCUGGGAAUGGCAUCUCCACUCCU  
CCUAGUACAAAGAACCUGCUUCCUCAUACCCCGUCAAGGAACUGCAGCAUCCAGGUGAUGGCCACAGUGG  
CAGAACCUAGGAAGCCAAGAAGAAACCAGAGAAUGGAGACACAUGGCAGCAAUGGCAAGUCAUCAGACCC  
AGGAUUUCCCAAAGAACACUGGUCCAGGAAGAUGCUCUGUGAAAAAGUGUCCUGGUCGGAGAAAUUG  
UGAAACACUUUGCAUAAUACUAAAAAGAAUGUAUGGCACAUCAAAGGUAAUAUGCAAUAAAAGAAUUCAU  
UUUUUUAAAACCAAG

>NR\_170236.1 Homo sapiens long intergenic non-protein coding RNA 1906  
(LINC01906), long non-coding RNA  
AGGAATATGTGGAAATTCTCCTGGGTTTTCCAGCTCCTGAGAGAGCCCCTGGCTTTGTGGGGTGAAGTCCT  
TTGATTGCCTCAGGTTCTGATCTGTTCGTGACCCTGTTAGCCCAAAGCTGGCAGAGCTCCATTCTTTT  
TAGGTCTTATTCTCAGACGGTCTTGGGTAAATGGTGGCTGATTGCCCTTCAGCATCTAGAACAAAACACTC  
TATGGCCCAGAGGAATTCCAGCTGGAATCTATGATCTTATTCTCTTGAGGAATGGACCATGCAGTATCCT  
TCAAGGAAGAATCAAGAATGTTTCCACAGAGAATATACATATTTTCATCTCTTTCTCTGCTGAATGGATCC  
CCACTGAAAAGCCATGAATTTCTCTTATTAGACCCTGTAGAATCCCAGTTTATGGCAGTGACATTAAAAAC  
ATCTAGTTTATGACTTGGATTAGGCAGCCTGTAAAAATGGCTTCCAGTGATCCCTGCT

RNA

>LINC01906

AGGAAUAUGUGGAAAUUCUCCUGGGUUUCCAGCUCCUGAGAGAGCCCUGGCUUUGUGGGGUGAAGUCCU  
UUGAUUGCCUCAGGUUCCUGAUCUGUUCGUGACCCUGUUAGCCCAAAGCUGGCAGAGCUCCAUUCUUUU  
UAGGUCUUUAUUCUCAGACGGUCUUGGGUAAAUGGUGGCUGAUUGCCUUCAGCAUCUAGAACAAAACACUC  
UAUGGCCCAGAGGAAUCCAGCUGGAAUCUAUGAUCUUUAUUCUCUUGAGGAAUGGACCAUGCAGUAUCCU  
UCAAGGAAGAAUCAAGAAUGUUUCCACAGAGAAUAUACAUAUUUCAUCUCUUUCUCUGCUGAAUGGAUCC  
CCACUGAAAAGCCAUGAAUUUCUCUUAUAGACCCUGUAGAAUCCAGUUUAUGGCAGUGACAUAUAAAAAC  
AUCUAGUUUAUGACUUGGAUUAGGCAGCCUGUAAAAUGGCUUCCAGUGAUCCCU

>XR\_002958212.2 PREDICTED: Homo sapiens long intergenic non-protein coding RNA 1908 (LINC01908), ncRNA  
ATTCCCCTGTGCCCCACAACAGCACCCGAAGCACCGAGTTTATTTCCAGGCAGGCAGTGAGCAGGGCTG  
AGAAATTGCCCCAGGCTACAAGCCTCCCAGCTGAGAAAGCAAGCAGACTCACAGTTCCTTGGCTGTCCCA  
TGCAGCCTGCAGCAGCAATCCACCCCCTTTAAAGTGTCTGTGGATTCTTTTCAGCTTTTTTGGTTCAAGCA  
ATTCTCCTGTCTCAGCCTCCCGAGTAGCTGGGATTACAGTCATGTGCCCTGTGTCCAGAATTGGTTCCCT  
TCTGGTGGGTCTTGGTCTTGCTGTCTTCAAGAATGAAGCCGTGGACCCCTCGTCATGAATGTTACAGTTC  
TTAAAGATGAAGAGAACAGCATCAGGGCACATTGAGGCTCAGAAAATTTATATTCCAAGAAGAGGTGCACA  
GGAACAGAGCAGATCCAAAAGCAGACAACCACCTGGAAGCAGTCATAACAACAGCAATAGCAAATCAATGC  
TGATAAAAAGAAATCAAGTACAGAGAGTTTAAAGGACATTGTCCAAAGTTGTACAAGGGCACCATT'TTTAA  
AAGTTGACAACCTCCTGCAGGGATGTTCTGAAAGACAGAGACATCTTGTTCGGAATTATGAATGTCCTTGG  
TGGATGAGGCAGAAAGAGTTGACTGTGTAGGACATTCTGACAAGTCCCTCAGGATTTGAAATGACTCCAA  
CACTAAGCATTACCTGGAGATAACCTACAGAGATACTCTGTGTTACCCACAACCTAGTCTGTTGACTAAG  
TTGGTGAATATATTTGGGAAAAGCCCATGTGGAAGAAATGGAAGCCTGCATTATCTTTCTCAGAGACAGAC  
AGGAAGGTGACTCTATGGAAGACATCAGCGATAAACTAGGAAGGAGTGACACGGTAAGTGAAAATAGAGA  
TATGCAGTGTG

RNA

>LINC01908

AUUCCCACUGUGCCCCACAACAGCACCCGAAGCACCGAGUUUAUUUCCAGGCAGGCAGUGAGCAGGGCUG  
AGAAAUUGCCCCAGGCUACAAGCCUCCAGCUGAGAAAGCAAGCAGACUCACAGUUCUUGGCUGUCCCA  
UGCAGCCUGCAGCAGCAAUCCACCCCCTUUUAAAGUGUCUGUGGAUUCUUUCAGCUUUUUUGGUUCAAGCA  
AUUCUCCUGUCUCAGCCUCCCGAGUAGCUGGGAUUACAGUCAUGUGCCCCUGUGUCCAGAAUUGGUUCCU  
UCUGGUGGGUUCUUGGUCUUGCUGUCUUAAGAAUGAAGCCGUGGACCCUCGUCAUUGAAUGUACAGUUC  
UUAAAGAUGAAGAGAACAGCAUCAGGGGCACAUUGAGGCUCAGAAAUUUAUUAUCCAAGAAGAGGUGCACA  
GGAACAGAGCAGAUCCAAAAGCAGACAACCACCTUGGAAGCAGUCAUAACAACAGCAAUAGCAAAUCAAUGC  
UGAUAAAAGAAAUCAAGUACAGAGAGUUUUAAGGACAUUGUCCAAAGUUGUACAAGGGCACCAUUUUUAA  
AAGUUGACAACCUCUGCAGGGAUUGUUCUGAAAGACAGAGACAUUCUUGUCGGAUUAUGAAUGUCCUUGG  
UGGAUGAGGCAGAAAGAGUUGACUGUGUAGGACAUUCCUGACAAGUCCUCAGGAUUGAAAUGACUCCAA  
CACUAAGCAUUCACCUGGAGAUAAACUACAGAGAUACUCUGUGUUACCCACAACUAGUCUGUUGACUAAG  
UUGGUGAAUAUAUUUGGGAAAAGCCCAUGUGGAAGAAUGGAAGCCUGCAUUAUCUUUCUCAGAGACAGAC  
AGGAAGGUGACUCUAUGGAAGACAUCAGCGAUAAACUAGGAAGGAGUGACACGGUAAGUGAAAUAAGAGA  
UAUGCAGUGUG

>NR\_126336.1 Homo sapiens long intergenic non-protein coding RNA 1909 (LINC01909), long non-coding RNA  
TTGGGTCTGTCTTGGTGATAAAAGATAAAACTAAAGGACAATCAAATCTCATCAAACCTCTCTCTGAGGA  
GCTGATGACGTTTCAGAAACAGTGACAAAGTTCAGAATCCCATTTCTTCATCCTAGATGGGAAACATCAA  
CTTTCCTGATGATGCTGAAAAAGCAAGATACTCATTTTTTCCAGCCACCCCTTGACAGGCCAGAAAGCCCA  
TGAGATTCAATAGATGTAAGACTGAGAGAGATTTTCATTCCCTGGATGAAAGGAGACAGGCCCTGGGAGAAG  
AGTTTTCTCTTGCCATCTTTGCAGTCTCTCCACTCCTGACGTGTACAGGGTCAGGAAAGGCCATGTGAAA  
ACATGGCGAGAAGACAGTCATCTGCAACCCAAGGAGAGAGACTTCACCAGACACTGACCCTGCTGGCACC  
TTGATCTTGGAAGTTCCAGTGTTCAGAACTATAAGAAATAAATTCCTGTTATGTAAGGTGCCCAGTCCATG  
GTATTTTGTGTGAACAGCCTGAGCTGTTGAAGATGGATTTTCCCTTTCAAGATCAGATCTTGGGCCCTCAGA  
GTCAGCCTCACTATAGAAAAGCAAGGGCTAGTCTCAGCTTCCACAGAAGACTTGGTTTTATTGGAGGCAA  
GTTTTGTCTTGCTTACAATGAGGTTATACAAAGCATAACAAAATTCACATTTTGTTAAGTGAATACCATA  
TGATCACTCTGAATTTTATTTTACCTGTCAATTTCTCGGTATCAATAGGTTTTACTTCCCCTTGTCTGGA  
TTTCAGTGATTGATGACTGAATACAATAAATATTTATTGAGCGCC

RNA

>LINC01909

UUGGGUCCUGUCUUGGUGAUAAAAGAUAAAACUAAAGGACAUAUCAAUCUCAAACUUCUCUCUGAGGA  
GCUGAUGACGUUUCAGAAAACAGUGACAAAGUUCAGAAUCCCAUUCUCCAUCUAGAUGGGAAACAUCAA  
CUUUCUGAUGAUGCUGAAAAAGCAAGAUACUAUUUUUCCAGCCACCCUUGCAGAGCCAGAAAGCCCA  
UGAGAUUCAAUAGAUGUAAGACUGAGAGAGAUUUUCAUCCUGGAUGAAAGGAGACAGGCCUGGGAGAAG  
AGUUUUUCUCUUGCCAUCUUGCAGUCUCUCCACUCCUGACGUGUACAGGGUCAGGAAAGGCCAUGUGAAA  
ACAUGGGCGAGAAGACAGUCAUCUGCAACCCAAGGAGAGAGACUUCACCAGACACUGACCCUGCUGGCACC  
UUGAUCUUGGACUCCAGUGUUCAGAACUAUAAGAAAUAAAUCCUGUUAUGUAAGGUGCCCAGUCCAUG  
GUAUUUUUGUUGUAACAGCCUGAGCUGUUGAAGAUUGGAUUUUCCUUUCAAGAUCAGAUUCUUGGGCCUCAGA  
GUCAGCCUCACUAUAGAAAAGCAAGGGCUAGUCUCAGCUUCCACAGAAGACUUGGUUUUAUUGGAGGCAA  
GUUUUGUCUUGCUUACAAUGAGGUUAUAACAAAGCAUAACAAAAUUCACAUUUUGUUAAGUGACUACCAUA  
UGAUCACUCUGAAUUUUUAUUUUAACUGUCAUUUCUGGUAUCAAUAGGUUUUACUCCCCUUGUUCUGGA  
UUUCAGUGAUUGAUGACUGAAUACAAUAAAUUUUAUUUGAGCGCC

>NR\_110764.1 Homo sapiens long intergenic non-protein coding RNA 1910 (LINC01910), long non-coding RNA  
AGACTGATCTGAGTAATAATAACACTCCAGTCTTCTGCACAGCCAGCTCTGCATGAATTACTCTTTCTCT  
ATTGCAATTCCCCTGGCTTGATGAATCAGCTCTGTCTAGGCAGCGGGCAAGAGAAATCCTGAGGCTCAAA  
GACACTGAATGACCTGCTGCTTACACACAGGTGGTCAGTGTGGCCAAAGACCAGGACGAGCAGTCCAGG  
CAGCTGTACATTTCCAACATGTGGAAAGCCTCGCCAAAGCATGAGCTCTGCTGTCTCCCTTCCATGCGAG  
CGAGGCCACACGAGGCGGACGCAGATTTGTTCCAGCAGCTTCACCAGGGAATAAACAGCAGGCATAGATT  
ACACACTCTTTCTATATTACTATGAAGCTTCAAGATATTTTATGCGGCTTTTGTAAAGAAACATAATCCTA  
CTAACATTGACTGAGTACCAGGCCCTCTGCTAGGAGGCAGGGAAACTGCATACAGCAACTCCAGCACCAT  
CCAGCCTCGAGGGCGAGGCAGACTCGTAAGTGGGTGATCATAACAGCGAGTGCTAAATGATATATTGGGA  
AAATCACAGAATACTGTGCAACACCCAGGGTGTGCTCTCACCCTCTTGAGAATGAGGAAGAGTTAACC  
CAGAACAAAGAAAGGGTAGTTGATGTTTAGTGTGTTGGGCAGATGTATTCCAAGCAAAGGGAACATTATTG  
GTAAAGAAGAAAGGGGATTGAGAGCCAGAGTCTTCGGAGAGCTGTAAATATTCTGTCAAGGCACAGAA  
GCGAAGTTTGAGGTTTATGCTACCGACAATGGGAATCTCTAAAAGGAGTTCAGAAAGATCTGAAAATAGA  
CTCAAAGATTTCTTCAACAAAAGGAGATGGGTGTCTGAAAATGATGAAGATGTGGTCCCTGACTCCAAAG  
AGCTCATCACCTACTGGGAGAGACAGATATGTAAACAAATCATTACAGAACAATTTGTTTCTATTCTAAAT  
GTAGCACACAAAAAGAGCTGGGGACAGTGAAGAGGAAGCCGTCTAGCGCTGCCCTGCGGAGAAGAAAGGAAG  
GCTTTGTGTAGGTGACAACTGAGCAAGATGACAGATGAGTGGGCGGAAACCAGTCCCTAGCAGAAGGGGTG  
GACCCTTGGGGCGGGACAGGAAGGGCACCTCCAATTCTATTACCCAAGATTAAATGAATGGAACATTTCGC  
CGTACTCTTTAAATTTCAAGAATTTCTTTTCTTTCTTTCTTTTCTTTTCTTTTCTTTTCTTTTCTTTTCTTT  
CGCCAGGCTGGAGTGCAATGGCGCAATCTCGGCTCACCGCAACCTCCGCCCTCTGGTTCAGCTATTCT  
TCTGCCTCAGTCTCCCGAGTAGCTGGGATTGCAGGCATGAGCCACCACGCCCCGGCTAATTTTGTATTTT  
AGTAGAGATGAGGTTTCTCCATGTTGGTCAGGCTGGTCTCAAACCTCCTGAACCTCAGGTGATCCGCCCCC  
TTAGTCTCCCAAAGTGCTGGGATTACAGGCGTGAACCACCATGCCCGACCTAAATTTCAAGAATTTCTAT  
TGCAACTCCTTTTGCTCAGGAATTTGTCCCTTCTCTAGTGGAGATAGTGAATGTTAAACTGTAACCTACA  
TATCTCTTCTCAAGGATTTTGAATGTTTGTGTTGTACAGAGAACACTCCATCTGGTATATCCAGAAACAA  
AAGGAGCTTTTCTAGTAAGATTTTCTAGTGACCGGAAGCCGTGTTCTATTCTAGAGACTGCATTCTCAGAAG  
CTTTTCTGCCCTAAGCACAAAATCAGAGGCAAGTAGGAGGAGTGGGGCTGCACCTGAGTGCAGCATTGCTG  
TACCCATCCTGTTTCCAGACAAGCAGATTCAAAAATCAAGTGTCTTATTCTACTGGGGTTAGAAAGAATC  
TATTTTTTTCTTTTGGCAGCATCAACATCAGAAATAATTCCACTGAAAAGAATATTATACCTAATGTAT  
TCTACTTAAAGTCCAACAAATACATTAAGAGCAGAAAATTGTAGGATACAAGATTCTCAAATTTTCTAGTA  
ATACAGCTCAATATCAGTACACAAGGTGAGGCCTTATGGACTGAAGGGTTGTGTCCACCCAAAATTCATA  
TGTTGAAGCCCTAACCCCCCACTGCGATGGTATGAGGAGGTGAAGCCCTGGAAGATGATTAGGTCATGA  
GAGAGAAGCCCTTGTCAATGGGACTAGTGACCTTGCCAAAGGGACCCCTAAAGAGCTCTTATGCCCTCCTT  
CCTCTTGTGAGTGACAACTAGCCGGCAAGCCAGAAGAGGACCCCTTATCAGAACCCTGACATTGCTGCACC  
CCAATCTCAGAAATCCAGCCTCCAAAAATCGGAGAAAATATATTCTATTGTTTATAAAACCACGCTGGGGTA  
CTTTGTTGTAGCAGCCAAAACCTGACTAAGATGAGAGGCCAAAAAAGGTGCTTTCCCTATTAAACAGCACGA  
CTCTGCCCGTGCTTACAAAGAACTGTGGTTGAAATGGATTACGCTTTACAACATCTGCAGAAGGCTAAGT  
TACGTGCGGCAGTAGTGGTGGAAATGTTGAACTAGGAACTGTATTAAAGGGGTTGAAAGTAAAGGGATGAG  
CCATAATTTATTAGGAAAACGCAATAAAAGTAGTGGAATAGCAA

RNA

>LINC01910

AGACUGAUCUGAGUAAUAAUAAACUCCAGUCUUCUGCACAGCCAGCUCUGCAUGAAUUAUCUUCUUCUCU  
AUUGCAAUUCUCCUGGCUUGAUGAAUCAGCUCUGUCUAGGCAGCGGGCAAGAGAAUCCUGAGGCUCAAA  
GACACUGAAUGACCUGCUGCUUCACACACAGGUGGUCAGUGUUGCCAAAGACCAGGACGAGCAGUCCAGG  
CAGCUGUCACAUUUCACAUGUGGAAAAGCCUCGCCAAAGCAUGAGCUCUGCUGUCUCCCUCCAUGCAG  
CGAGGCCACACGAGGCGGACGCAGAUUUGUUCAGCAGCUUACCAGGGAUAAACAGCAGGCAUAGAUAU  
ACACACUCUUCUAUAUUAUUAUGAAGCUUCAAGAUUUUUUAUGCGGCUUUUGUAAGAAACAUAAUCCUA  
CUAACAUAUGACUGAGUACCAGGCCUCUGCUAGGAGGCAGGGAAACUGCAUACAGCAACUCCAGCACCAU  
CCAGCCUCGAGGGCGAGGCAGACUCGUAAGUGGGUGAUCUAUACAGCGAGUGCUAAAUGAUUAUUGGGA  
AAAUACAGAAUACUGUCGCAACACCCAGGGUGUGCUCUACCCAUUCUUGAGAAUGAGGAAGAGUUAACC  
CAGAAACAAAGAAAGGGUAGUUGAUGUUUAGUGUUUGGGCAGAUGUAUUCCAAGCAAAGGGAACAUUAUG  
GUAAAAGAAGAAAGGGGAUUGAGAGCCCAGAGUCUUCGGAGAGCUGUAAAUAUUCUGUCAAGGCACAGAA  
GCGAAGUUUGGAGUUUAUGCUACCGACAAUGGGAAUCUCUAAAAGGAGUUCAGAAAGAUUCGAAAAUAGA  
CUCAAAGAUUUCUUAACAAAAGGAGUUGGGUGUCUGAAAAUGAUGAAGAUGUGGUCCUGACUCCAAAG  
AGCUCAUACCUACUGGGAGAGACAGAUUAUGUAAAACAAUUAUACAGAACAAUUGUUUUAUUCUAAAAU  
GUAGCACACAAAAGAGCUGGGGACAGUGAAGAGGAAGCCGUCAGCGCUGCCUGCGGAGAAGAAAGGAAG  
GCUUUGUGUAGGUGACAAACUGAGCAAGAUAGACAGAUAGUGGGCGGAAACCAGUCCUAGCAGAAGGGGUG  
GACCCUUGGGGCGGGACACAGGAAGGGCACCUCCAUAUUAUACCCAAGAUUAAAUGAAUGGAACAUUCGC  
CGUACUCUUUAAAUAUUAAGAAUUAUUAUUAUUAUUAUUAUUAUUAUUAUUAUUAUUAUUAUUAUUAUUA  
CGCCAGGCUGGAGUGCAAUGGCGCAAUCUCGGCUCACCGCAACCUCCGCCUCCUGGUUCAAGCUAUUCU  
UCUGCCUCAGUCUCCCGAGUAGCUGGGAUUGCAGGCAUGAGCCACCACGCCCCGCUAAUUAUUAUUAUUA  
AGUAGAGAUGAGGUUUCUCAUGUUGGUCAGGCUUGUCUAAACUCCUGAACUCAGGUGAUCGCCCGGCC

UUAGUCUCCCAAAGUGCUGGGGAUUACAGGCGUGAACCACCAUGCCCGACCUAAAUUUCAAGAAUUUCUUAU  
UGCAACUCCUUGCCUCAGGAAUUUGUCCCCUUCUAGUGGAGAUAGUGAAUGUUAACUGUAACCUACA  
UAUCUCUUCUCAAGGAUUUUGAAUGUUUGUUUGUACAGAGAACACUCCAUCUGGUUAUAUCCAGAAACAA  
AAGGAGCUUUUCAGUAAGAUUUUCAGUGCACGGAAGCCGUGUUAUUUCUAGAGACUGCAUUCUCAGAAG  
CUUUUCGCCCUAAGCACAAAAUCAGAGGCAAGUAGGAGGAGUGGGGCUGCACCUGAGUGCAGCAUUGCUG  
UACCCAUCCUGUUUCCAGACAAGCAGAUUCAAAAAUCAAGUGUCUUUUUACUGGGGUUAGAAAGAAUC  
UAUUUUUUUCCUUUGGCAGCAUCAAACAUCAGAAAUAUUUCCACUGAAAAGAAUAUUUAUACCUAAUGUAU  
UCUACUUAAAAGUCCAACAAAUAUAUUAAGAGCAGAAAAUUUGUAGGAUACAAGAUUCUCAAUUUUUCAGUA  
AUACAGCUCAAUAUCAGUACACAAGGUGAGGCCUUUAUGGACUGAAGGGUUGUGUCCACCCAAAAUUAUA  
UGUUGAAGCCCUAACCCCCACUGCGAUGGUUAUGAGGAGGUGAAGCCCUUGGAAGAUGAUUAGGUCAUGA  
GAGAGAAGCCCUUGUCAAUUGGGACUAGUGACCUUGCCAAAGGGACCCUAAAGAGCUCUUAUGCCCUCCUU  
CCUCUUGUGAGUGCACAACUAGCCGGCAAGCCAGAAAGAGGACCCUUAUCAGAACCUGACAUUGCUGCACC  
CCAAUCUCAGAAUUCAGCCUCCAAAAUCGGAGAAAUAUAUUUCUAUUGUUUAUAAACCACGCUGGGGUUA  
CUUUGUUGUAGCAGCCAAAACUGACUAAGAUGAGAGGCCAAAAAAGGUGCUUUCUUAUUAACAGCACGA  
CUCUGCCCGUGCUUACAAAGAACUGUGGUUGAAAUGGAUUCAGCUUUAACAACUUCGCAGAAGGCUAAGU  
UACGUGCGGCAGUAGUGGUGGAAAUGUUGAACUAGGAACUGUAUUUAAGGGGUUGAAAGUAAAGGGAUGAG  
CCAUAUUUAUUCAGGAAAAACGCAAAUAAAAGUAGUGGAAAUAGCAA

>NR\_183524.1 Homo sapiens long intergenic non-protein coding RNA 1912 (LINC01912), long non-coding RNA  
GTTAGGATTGAGATGTCTATTTGACCTTCAAATTTGAAATGTAAAGTAGGAATTGGATATTATAGTCTGGG  
GAATCCAGAGAAGTGCAGGACCAAAATAACAAATTTAGGGGTCATTTGTGTACAATAACTAGAAGAAGAAA  
ATAACAGAGTTCCAGAAATATATGGCCAGTTGGATATCAAGACTAAAAATATTAATAATGAAAAATATGAT  
CAATGGCATCAAGCACCGCTGAAAGGTCAAGCAAATAAGAAATTGAGGGCTGACTACAGGTTTTGAACATA  
TGGAAGACACTGGTGACCTTAGGGGAGACACAAGAGATAAATTTGGAAACAGTGGACAAAAACAATTTTGA  
GATATTTTTCTGTAAAGGGAAACAGAGCAATATGATGGTTGTTGGAAAAAGAAGTGGAGATTGAGGTTAT  
GGTTATTATTTTTATTATTATTATTAGGGAGGCCGTGACAAGCTGTTTGTGACATAAGGGAAAGATACATTA  
CAGATGAAGGAGAGATGAAGGAGAGAGAAAAAGATAAATTGCTAAGAATTATCCTGGACTATGTGAGACAGA  
AACAGAATATATGAATGGGAGGTTCGATTTTCACTAAATTTACTCACGATTTATTTCAGAGTAATAGGAAAA  
ATGTCAAATATAAGTGTATCAATATTGAGTGTAAATTTTGGTACACTTATACATTTTTCTTAGTACTATTT  
CCATAAGTGATAGAAAAAATGTCAAATATAAGTGTATCAATTTGAGTGTAAAGAGCTTGTGAGATCTTCAA  
TTTTTCGATTTTATGCGATAGGACTATTTGGAAAAGATTTTGGTGGCTGGGACTGTAGTTGTTTTGACA  
TTAATGGTGATGAGGTATAAGATACAGGCATCAAAGTGACAGTTAAGGAGGACTGTTTCCATTTCTCTCA  
GTTTAATCTTCTCAGGTGAGTTTGAGGTGCCAAATAACATAGATTCCAGGATTTGGAAAGGCCACACAG  
GTGTACAGTGAAATAATGAAGGATTTAAAAAGTTGTGTTGGAGAGAAATAGAGTGAGCACAGACATAAGAT  
TTCAAGGAATAAGGAGGAGTAAACCAAGTCAGTGCTACTGGCAACAAGAAAAGATTGACTCATGATATG  
AAAGTCCAAGCTGAAGGCGGAGAGGGAAGGCTCTAGAAAAAGCAATGCAGAACGAAGAAGTCACATCCGT  
CACTTTCAAGCCTAGGTGTATGAGGTGTGGGGGAGGAAAGCACAGGCATCCCCTGAGAAGCCTGTTGGAGA  
ATCAGCATCCTCAGGGGAGATTCGAGTTTCAATCGAGCAAGAAGCATCCAGAGGCACTTTAAACCAAAC  
CCTGGAGAGAGAAGAAAATAAGTATATTACTGTGTCTGTTTGCACAGCAAGAAGTTAGCATCATCTCTCT  
GTATTTTGGATTTTGTCTTCTATTTCTCAGTTTAACTCTTCTCAGCCATAGGTCATAAAGATGGCGATGG  
TTATTTCTCTTCTCATCCCATGGTTTGTACAAATGTGACTTTGCGGTTCTTCCCATCAGTAAACAGAAG  
CCATTTTCTTACTCCTTCTGCTCTGGATGGGCTTGTGCTTGTCTTGTGAGCAATAGAACGCATCAGAAGGT  
GACCTCATGCCAGTTTTCATGCCCTTGGCTTCAGGAGGCCCTTGAATTTCTCTGCTGCTCCTTAGGAATCTTCT  
GAGCCACTGCTTAAACAAGCTCCAACCTCTCCAGCTGGAAGATGAGGCATAATACAGAGGAGAGGCCAACT  
GTCCTAAAGAGACTACCTAAGCCAACCAAGTCCAGATGACAGGAGGTTGACCTTGACACATGTGTAAGCC  
CAGCCAAGGTGAGCCAACCTAGTACAGATCAGAAAAACCATCTATCAATGCTCAGCCCAAATTTCCAAC  
CCACAGAAATATGAATTAAATAAATGATTGTTGTTTAAACCA

RNA

>LINC01912

GUUAGGAUUGAGAUGUCUAUUUGACCUUCAAUUUGAAAUGUAAAGUAGGAUUUGGAUAUUUAUGUCUGGG  
GAAUCCAGAGAAGUGCAGGACCAAAAUAACAAUUUAGGGGUCAUUUUGUGUACAAUAACUAGAAGAAGAAA  
AUAACAGAGUUC CAGAAUAUAUGGCCAGUUGGAUAUCAAGACUAAAAUAUUA AAAAUGAAAAUAUGAU  
CAAUGGCAUCAAGCACCGCUGAAAAGGUCAAAGCAAUAAGAAUUGAGGGCUGACUACAGGUUUUGAACAU  
UGGAAGACACUGGUGACCUUAGGGGAGACACAAGAGAUAAUUUGGAAACAGUGGACAAAAACA AUUUUGA  
GAUAUUUUUCUGUAAAAGGGAACAGAGCAAUAUGAUGGUUUGUUGGAAAAAGAAGUGGAGAUUGAGGUUAU  
GGUUAUUUAUUUUUAUAUUUAUUUAGGGGAGGCCUGACAAGCUGUUUGUUGACAUAAAGGGAAAGAUACA  
CAGAUAGAAGGAGAGAUAAAGGAGAGAGAAAAAGAUAAUUGCUAAGAAUUAUCCUGGACUAUGUGAGACAG  
AAAGAAUAUAUGAAUGGGAGGUCGAUUUUCACUAAAUUUACUCACGAUUUAUUCAGAGUAAUAGGAAAA  
AUGUCAAAUAUAAGUGUAUCAUAUUUGAGUGUAUUUUUGGUACACUUUAUACAUUUUUCCUAGUACUAUUU  
CCAUAAGUGAUAGAAAAAAUGUCAAAUAUAAGUGUAUCAUUUGAGUGUAAGAGCUUGUGAGAUUCUCAA  
UUUUUCGAUUUUUAUGCGAUAGGACUAUUUGGAAAAGAUUUUGGUGGCUGGGACUGUAGUUGUUUGACA  
UUAAGUGGUGAUGAGGUUAAGAUACAGGCAUCAAGUGACAGUUAAGGAGGACUGUUUCCUAUUUCCUCA  
GUUUAAUCUUCUCAGGUGAGUUUGAAGGUGCCAAAUAAAUAGAUUCCAGGAUUUGGAAAGGCCACACAG  
GUGUACAGUGAAAUAUAAGGAUUUAAAAGUUGUGUUGGAGAGAAAUAGAGUGAGCACAGACAUAAAGAU  
UUCAAGGAUAAGGAGGAGUAAACCAAGUCAGUGCUACUGGCAACAAGAAAAGAUUGACUCAUGAUUAG  
AAAGUCCAAGCUGAAGGCGGAGAGGGAGGCUUAGAAAAAGCAAUGCAGAACGAAGAAGUCACAUCCGU  
CACUUUCAAGCCUAGGUGUAUGAGGUGUGGGGGAGGAAAGCACAGGCAUCCUGAGAAGCCUGUUGGAGA  
AUCAGCAUCCUCAGGGGAGAUUCGAGUUUCAAUCGGAGCAAGAAGCAUCCAGAGGCACUUUAACCAAAC  
CCUGGAGAGAGAAGAAAUAAGUAUAUAUCUGUGUCGUCUUUGCACAGCAAGAACUAGCAUCAUCCUCUU  
GUAUUUUGGAUUUUGUUUCCUAUUUCCUCAGUUUAUCUUCUCAGCCAUAGGUCAUAAAGAUUGGCGAUGG  
UUAUUUCCUUCUCAUACCAUGGUUUUGUUAUAUGUGACUUUGCGGUUCUUCUCCAUAGUAAACAGAAG  
CCAUUUUCUACUCCUUGCCUCUGGAUGGGCCUUGUGGCUUGCUUUGAGCAAUAGAACGCAUCAGAAGGU  
GACCUCAUGCCAGUUUCAUGCCUUGGCUUCAGGAGGCCUUGAAUUCUCUGCUGCUCCUAGGAAUCUUCU  
GAGCCACUGCUUAACAAGCUCAACCUUCUCCAGCUGGAAGAUGAGGCAUAAUACAGAGGAGAGGCAACU  
GUCCUAAAAGAGACUAACCUAAGCCAAACGUCAGUACAGGAGGUUGACCUUGACCUAGUUAAGCC  
CAGCCAAGGUCAGCCAAAACCUAGUACAGAUACAGAAAAACCAUCUAUCAAUGCUCAGCCCAAUUUCCAAC  
CCACAGAAAUAUGAAUUAUUAAUAAUAGAUUGUUUUUUAACCA



>NR\_040033.1 Homo sapiens long intergenic non-protein coding RNA 1915 (LINC01915), long non-coding RNA  
AATCACTAATGACCTCATCTTCAAATGGTCAGTGATAATAAAACAAGAAGGAGGGATTTCCAAGGGAGCAG  
AGCATTAATAAGCTACTTGTGCAAGAAGCTACAATGAGAAAAAAATAGCAAGAAATAGATGAGGGAAGG  
AGGTTCTGTAGAGGGAAAAACAAAGAGAGAAAAAGGAGAATGAATTGTGCTGAGAAAGAGATGCCTGGATG  
AAGAAGCTGGCCCTAGCACCCATAAAGCTGGAAAAGAAAGTGGGGCCCTTGGAACCTTCTGGAAGGATGCGA  
GGAAAGAAAAATGCAAGGAAATGAGATGGAGAGGAGAAAGAGAAACCAGGAAGCAGCTTCGGAAGCATGTGA  
AATTACAAGGAAATGAGGAACAGCCCTTTATTGAAACAGTCTGTGAAGTCTGTGCTAGCGCTGAGAGCTTC  
ATTTTACTGTCTCTGGCAAGGAGGTGTGGCCCCCTCTCCAGTGCCAGCACCTCATCGCTGTGGTAACAGAA  
GACACGCTTATCTTCCGGATTTTGCCTCAGAGACTTGGGCTGTACAAGCTGCTTTCTGGGGTGGCTTGT  
CCTTTTGCAGTTAACCGAGATGCCTGGGGAGAAGAGCTTCCCCAACAGGATGGCAGGCGATGCTTCCAG  
ATGCGGTCACTTGGCACGTCTGAGCCGAATGTCTCCATAAAAAATATGATGTAATTAAACAGAGCCGCAGCA  
GCTGGAACAATTGACACCTCACATTGATTTTCCATGTCTCCTATTTACTTTTCACTTTTAACTGTCTG  
CAGTGACAGGAAATCAAAGAATTATAATGGTGTGTGTGAGGGCCCAATGCTGGGTGCGCATTTCTTTGTG  
AAATCCTGAGATTAATCAGTTTCTTATCACTCAATCATCCCTTTTCACTTCTAAAGGAAAACGTGTCTCC  
CAAATGCTACGAAATAGCAGTCTATTTTGGATATTAATAAAAAATCAATTGTATTATTTTAAAAATTTGAGA  
GGAGTGTTTTTTAAAAAAAGTCAGCCCGAAGCAATATTCACTTATCTGTTTTCCCATTCAGTTTAAATAGG  
AGTTGGCAAAAGGCATTTGGGTGCAGTGAGACACAAGTACTATATTCACCCCTTCCCAAGTTTGGAGAGCTT  
GGAAAAGTTACTTGGTGGAACCAAGAGAGGAACGCAATTCAGTTTCAAGTTTGTATCACTGAAATGAAGGA  
AAATAAGTTTCCCATATGTGGTTATTCATGAGCCCTTCATCTGAAGCTGGTGGTTTTCTCATAGTTGGTC  
ACTGTATTTCCAGCTCTGTGAGGTGAAAGTCAGAATCTTGGGTAAATTTCACTTTGGGTTCCTTAAATG  
CTGGAGAAAAATAGGCAGCTGCGGTTGTAGTGGGGAAACAGGCCTCTGTCTGAAGTCAGCTTGTCTAGAT  
TGTGTTTGAAGACATGCCTCAGATTTAAGTGGTCTTGTCTTTTCCAGACTCCCTTGGCTTTGGCAGATT  
CTGTGCTTGGCCATCTGTAAGAACTCACTTTTCTTTGTCTTTTATTGATTCAAGCAATATAACCATTT  
TCATAAAATAATTAGGAAAAATAAGAGAAAAATTTCTCATAAATCTACTGCTCAAACGCAATAGCTATGAT  
TGCTTTGGAGCAATTGCTTTGGGTCAATTTTCAATGCTGAGTTTGGTATGATTCTAAGCATAATGTACA  
AACAACTTTACATGTTGCTTTTCACTTAATCTATGTGAGAAGCATCTCCCAAGTTATGATTAGCTTCA  
GTAATTATCTTTTAATTGCTGCCCAACAGCTGGAACAATTCAGTCCCTCTTATTGACTTTCCATGTGT  
CCTATGGAAGTAGAGACAGTCTATTAACATTTTCTGTATTTTGGGACAATAGATCAAATTCATTTTTCAC  
TGTAATTAATCCCATGATAAGTATCTTTATAAATAAGCCCTTTCTATATATAAGATAATTTCTTTAGGAT  
AAATTCCTAGAAATTACAGGGTCAAAGTGGATACATATTTTATGACTCTTGATATTTCTTATTGACCTTT  
AAAGCTATTATGTGACTTTATATTATCACCTAAAAATGTTTGAGGAATTCATGCTTTACGAGCGTATTTTA  
TTGACTAAATATGCAGTACTGAGAGAGCTTTATGTGTGCAGTTTGATGATGCTGACAGATATCCCGGAGA  
TAAACATTTTTTAATTTAAAGATGTTCTGTTTATGTTTAAACATACAGAAGTTAATGTTAAACATGATGCC  
TATTTTGTTTTAAACATACAGAAGTGACTGTATTAAAGCCATTTCTTCTAAATGTGCAATAAACATGAATT  
CTTTGCCTGGT

RNA

>LINC01915

AAUCACUAAUGACCUCUACUUCUCAAUUGGUCAGUGAUAAUAAACAAGAAGGAGGGAUUUCCAAGGGAGCAG  
AGCAUUAUUUAGCUACUUGUGCAAGAAGCUACAAUGAGAAAAAAAUAGCAAGAAUAGAUGAGGGAAGG  
AGGUUCUGUAGAGGGGAAAAACAAAGAGAGAAAAAGGAGAAUGAAUUGUGCUGAGAAAGAGAUGCCUGGAUG  
AAGAAGCUGGCCCUAGCACCCAUAAAAGCUGGAAAAGAAAGUGGGGCCUUGGAAACUUCUGGAAGGAUGCGA  
GGAAAGAAAAAUUGCAAGGAAAUAGAUUGGAGAGGAGAAAGAGAAACCAGGAAGCACUUCGGAAGCAUGUA  
AAUUACAAGGAAAUAGGGAACAGCCUUAUUGAAACAGUCUGUGAAGUCUGUGCUAGCGCUGAGAGCUUC  
AUUUUACUGUCCUGGCAAGGAGGUGUGGCCCCUCUCCAGUGCCAGCACCUCUACUGCUGUGGUAACAGAA  
GACACGCUUAUCUUCGGAUUAUUGCCUCAGAGACUUGGGCUGUACAAGCUGCUUCCUGGGUGGCUGU  
CCUUUUGCAGUUAACCGAGAUGCCUGGGGAGAAGAGCUUCCCCAACAGGAUGGCAGGCGAUGCUUCCAG  
AUGCGGUCACUUGGCACGUCUGAGCCGAAUGUCUCCAUAAAAAUAGAUGUAUUAACAGAGCCGCAGCA  
GCUGGAACAAUUCAGCACCUCACAUUGAUUUUCCAUGUCUCCAUUUUACUUUCAGUUUUUAAACUGUCUG  
CAGUGACAGGAAAUCAAAGAAUUAUAAUGGUGUGUGUGAGGGCCCAAUGCUGGGUCGGCAUUUCCUUGUG  
AAAUCCUGAGAUUAAUCAGUUUCCUAUCACUCUAAUCAUCCCUUUUCACUUCUAAAGGAAAACUGUCCUCC  
CAAAUGCUACGAAAUAGCAGUCUAUUUUUGGAUUAUAAAAAAUCAAUUGUAUUAUUUAAAAUUUGAGA  
GGAGUGUUUUAAAAAAAGUCAGCCCCGAAGCAUUAUUCACUUAUCUGUUUUCCAUUCAAGUUUUAUAGG  
AGUUGGCAAGGCAUUGGGUGCAGUGAGACACAAGUACUAUUAUCACCCUCCCAAGUUUUGAGAGCUU  
GGAAAAGUUACUUGGUGGAACCAAAGAGAGGAACUGCAUUCAGUUUUUUUGAUCACUGAAUUGAAGGA  
AAAUAGUUUCCCAUAUGUGGUUAUUAUGAGCCUUAUCUGAAGCUGGUGGUUUUCUAUGUUGGUC  
ACUGUAUUUCCAGCUCUGUCAGGUGAAAGUCAGAAUUCUUGGUUAUUUACUUUGGCUCCUAAAAUG  
CUGGAGAAAAUAGGCAGUCGCGUUGUAGUGGGGAAACAGGCCUCUGUCUGAAGUCAGUCUCUGAGAU  
UGUGUUUGAAAAACAUGCCUCAGAUUUAAGUGGUCUUGCUUUUUUUCCAGACUCCCUUGCCUUGGCAGAUU  
CUGUGUCUUGGCCAUACUGUAAGAACUCACUUUUUCUUUGUCUUUUUAUUGAUUCAAGCAUAUAACCAUU  
UCAUAAAAUAAUAGGAAAAUAAAGAAAGAAAAUUUCUAUAAUUCUACUGCUAAACGCAUAGCUAUGAU  
UGCUUUGGAGCAAUUGCUUUGGGUCAUUUCAAUUGCUGAGUUUUGGUAUGAUUCAAGCAUAAUGUACA  
AACAAUUUAUAGUUGCUUUUUCACUUAUUCUAUGUCAGAAGCAUCUCCCCAAGUUAUGAUUAGCUUCA

GUAAUUAUCUUUUAAAUUGCUGCCCAAACAGCUGGAACAAUUCAGUCCCUUUAUUGACUUUCCAUGUGU  
CCUAUGGAAGUAGAGACAGUCUAUUAACUAUUUCUGUAUUUUGGGACAAUAGAUCAAUUCAUUUUUCAC  
UGUAAUAAAUCCCAUGAUAAAGUAUCUUUAUAAAUAAGCCUUUUCUAUAUAUAAGAUAAUUCUUUAGGAU  
AAAUUCCUAGAAAUACAGGGUCAAGUGGAUACAUAUUUUAUGACUCUUGAUUUUCUUAUUGACCUUU  
AAAGCUAUUAUGUGACUUUAUAUUAUCACCUAAAAUGUUUGAGGAAUUC AUGCUUUACGAGCGUAUUUUA  
UUGACUAAAUAUGCAGUACUGAGAGAGCUUU AUGUGUGCAGUUUGAUGAUGCUGACAGAUAUCCCGGAGA  
UAAACAUUUUUAAUUAAGAUUUUCUGUUUAUGUUUAACAUAACAGAAGUUAUGUUAAACAUGAUGCC  
UAUUUUGUUUAACAUAACAGAAGUGACUGUAUUAAGCCAUUUCUUCUAAAUGUGCAAUAAACUAUGAAUU  
CUUUGCCUGGU

>XR\_001753544.3 PREDICTED: Homo sapiens long intergenic non-protein coding RNA 1916 (LINC01916), transcript variant X1, ncRNA  
ATACTTCTTCAGCTGCCCTGTGAAGAAAGACGTGTTTTGCTTTTCCTTCAGCCATGATTAGTCCTGTGAT  
GTTATGAGAAAAATGATTTGAAAAATGAGCTTGAGGTTTCAGCCCTGGAGGCCCTGAACAGACGAGCTGGCT  
GTGGCTAGTCACTCCCCACCAGCCTTGGCCGTGCACTCATGCCATTGAGCAGATTTGATGAAGCCAGCT  
TTCATGTTACGAGCTACCTCTGTGGAGAAGCCACATGTCAAGAGAGTGGATGACCCCTCTGCCCCACAGC  
CAGTGAGGAATGGAGGCCCTGAGGCCAATGGGCTACAAAGAACTAAATCCTGTCAACATTCATATGCATG  
ACCTTGGAATCAGATCCCACCCCCATCAAGGCCCTGACATGACTGCAATCCCAGCTGACATTTTGATTGTA  
GTCATGTAAGAGTCCCAGAGGACCCAGTTAAGCTAGGCACAGTCTCTTAATGCGGGGAAATTGTGAAGTA  
ATTAGTACTGTTGTTTTGGGATAATGTGTTACGTAACAAGAGACAGGTGATACAACATCTCTGAGATTCT  
CAACATGTTTGGTAAAAATAATTAAACTGCTTTTAATGTATATGTCATGATTAATGTTATCTATAATGAG  
TGTATTAGGGATACATTAATATTCACAAAGACTATATAGCTATTAACATAATTGTTCTGTGGCTTATAGAC  
ATAATTTTGGATGATTCGTTCTTTTTTGGCCACTAATAAATATACAAAAACCTTTCATGTTTTAAATGA  
ATAAAAAGTTATAATCTGAAGAGGTCTTTTATTTAAATGAAACACACTAAAACCATTGAATTTTAATAT  
TTATATTATGAAATGATCTGCCACTGTTTTTTGTAAGTGACCTGCTATTATGACTATATTTTCAAGTTA  
AAGATTCATGACGTTTTTGTGAGAAAAATATTTTAAAAACTTGTTAATTTTTTTCAGATTAACACAAAAA  
TCTATTGTAAAAATTTATAAAAACTAATAATTAAGTCTCTTTATTTTTCATGTGCTGCTCTTAAATAT  
AGGTTGTTTCAAAGACAGTAGCAATAAAAAATGTCAAATTCAGAATTCCTTCAGGGATGACCCTAAGTCTAA  
CAGGTATATCCTTTGAAACAAGAAAAATATCTAGCACCTTGGGAAATGAAAATAGTACATTTTATTTTC  
TCTTAATAAAATTAACTCAGATTGTCAATTGTTTATTGTTTCTGTTTGATACCATTGAGGTATTTGTTCC  
AGAGATAAAAAATATGTA

RNA

>LINC01916

AUACUUCUCCAGCUGCCUGUGAAGAAAGACGUGUUUGCUUUUCCUUCAGCCAUGAUUAGUCCUGUGAU  
GUUAUGAGAAAAAUGAUUUGAAAAUGAGCUUGAGGUUUCAGCCUGGAGGCCUGAACAGACGAGCUGGCU  
GUGGCUAGUCACUCCCCACCAGCCUUGGCCGUGCACUCAUGCCAUUCAGCAGAUUUGAUGAAGCCAGCU  
UUCAUGUUACGAGCUACCUCUGUGGAGAAGCCACAUGUCAAGAGAGUGGAUGACCCUCUUGCCCACAGC  
CAGUGAGGAAUGGAGGCCUGAGGCCAAUGGGCUACAAAGAACUAAUCCUGUCAACAUUCAUAUGCAUG  
ACCUUGGAAUCAGAUCCCACCCCAUCAAGGCCUGACAUGACUGCAAUCCAGCUGACAUUUUGAUUGUA  
GUCAUGUAAGAGUCCAGAGGACCCAGUUAAGCUAGGCACAGUCUCUUAUUGCGGGGAAAUUGUGAAGUA  
AUUAGUACUGUUUUUGGGAUAAUGUGUUACGUAAACAAGAGACAGGUGAUACAACAUCUCUGAGAUUCU  
CAACAUGUUUGGUAAAAAUAAUAAACUGCUUUUAAUGUAUUGUCAUGAUUAAUGUUUAUCUAUAAUGAG  
UGUAUUAGGGAUACAUAUAAUUAUUCACAAAGACUAUAUAGCUAUUAACUAAUUGUUCUGUGGCUUAUAGAC  
AUAAUUUUGGAUGAUUCGUUCUUUUUUUGCCACUAAUAAAUUAUACAAAACCUUUCAGUUUUUAAAAUGA  
AUAAAAAGUUAUAAUUCUGAAGAGGUCCUUUAUUUAAAUUGAAACACACUAAAACCAUUGAAUUUAAUAU  
UUUAUUAUGAAAUGAUCUGCCACUGUUUUUGUAAGUGUACCUGCUAUUAUGACUAUAUUUUCAGUUA  
AAGAUUCAUGACGUUUUGUGAGAAAAUAUUUAAAAACUUGUUAUUUUUUCAGAUUAACUACAAAAAA  
UCUAUUGUAAAAAUUUUAAAAUACUAAUAAUUAAGUCUCUUUAUUUUCAUGUCAGUGCUCUAAAAUAU  
AGGUUGUUUCAAGACAGUAGCAAUAAAAUGUCAAUUCAGAAUCCUUCAGGGAUGACCCUAAGUCUAA  
CAGGUUAUAUCCUUUGAAACAAGAAAAUAUCUAGCACCUUGGGAAAUAGAAAUAGUACAUUUUUUAUUUC  
UCUUAAUAAAAUUAACUCAGAUUGUCAAUUGUUUAUUGUUUCUGUUUGAUACCAUUGAGGUAAUUUGUCC  
AGAGAUAAAAAUUGUA

>NR\_110800.1 Homo sapiens long intergenic non-protein coding RNA 1917 (LINC01917), long non-coding RNA  
TCAAGGTTCTATCAGTGATAAATAAGGGAGGCTAAGGTATTGAGGAACCATATAATGTTATTTACTACTAC  
CTACTTTCTAATCTGCCTCATCTACTCACCTTCCTCTTTCTCTTCCTGTAATCTTATTGCATGGAAGAAA  
TTTTTGGTGAAGACAAGTTGTCTGTTTTTCTTAAAAATCATTTTTTTTAGCTAGTGGTATGTCTCGAACACT  
TTCCTAATAGTTTCATTGAGATAAAGTCATAACATTTTTTTTTTTCTTTCTTCGCTACCCCTCACTCATTGCC  
CCATTGGAATTGACTGCAAAATTGCAATTTTCTAGAGAAAAGAATCAGTAATCCTTTCTACACAGTGGCCTT  
GGTGATTTCAAAAACTTTAAGAATATTTAAAAATATTCAAGTTCTTTCTCCAAAAACTGGTGACTTTCTGCT  
GCTGAGCTCCTGAAAAGTTTTTGAGAAGAAAAGTTGAAAAGGTTGAAAATGGTGCTGTGTTTTATTTGAATATC  
TGAAGGGTAAACTCCAAGCTACTTATCTGAAAACAAATATTCTCTGAAACCTGCAGAGTAAAGAAGTATA  
ACTTGACATTTCTTCTGCAAGAAAAAAAACAAGAAGATGGTGACTTTCAAGACCTCAGTCAATGACTAAAG  
TTCTGTGACCACAGTGAGCATATTACTGCGGTAACCAGGGCAGTAATGTCAAGACAAAGGTCAGGGTTGG  
CTTTAAGAAAGAAGCCTGAGAACCGGAACTACATAGAGGCCAGAAAATCAGTGTCTACATGCTAAAGGCA  
ATTTTCAGGAACAAGTACCAGGAGCAGATCAACAAAACAAAGAAGATCAACAAAACAAATAAGGAAGGTG  
GTTTTATGAACCCAGAGGGGCAGTGGTTATGAGTTGTGGTGCCACTTTATTCAACCTTATCTGCTTGAA  
GTTTTTCTCCTACACCATTAACCCCTCACTGAACCAAACCTTTGTACAGACTGCAGCCAAGAAGGGCTGT  
ATTATGGCTTTTCTTGACCTCTTCATCCACAAAAATATTA AAAAATTGTATTTTCATGA

RNA

>LINC01917

UCAAGGUUCUAUCAGUGAUAAAUAAGGGAGGCUAAGGUUAUUGAGGAACCAUAUAAUGUUAUUUACACUAC  
CUACUUUCUAAUCUGCCUCAUCUACUCACCUUCCUCUUUCUCUCCUGUAAUCUUAUUGCAUGGAAGAAA  
UUUUUGGUGAAGACAAGUUGUCUGUUUUUCUUA AAAUCAUUUUUUUAGCUAGUGGUAUGUCUCGAACACU  
UUCCUAAUAGUUAUUGAGAUAAAGUCAUAACA UUUUUUUUUUCUUUCUUCGCUACCCUCACUCAUUGCC  
CCAUUGGAAUUGACUGCAAAUUGCAAUUUUCUAGAGAAAGAAUCAGUAAUCCUUUCUACACAGUGGCCUU  
GGUGAUUUCAAAAACUUUAAGAAUAUUUAAAAUAUUC AAGUUCUUUCUCCAAAAACUGGUGACUUUCUGCU  
GCUGAGCUCUUGAAAAGUUUUUGAGAAAGAAAGUUGAAAGGUUGAAAAUGGUGCUGUGUUUAUUUGAAUAUC  
UGAAGGGUAAACUCCAAGCUACUUAUCUGAAAACAAUAUUCUCUGAAACCUGCAGAGUAAAGAAGUAUA  
ACUUGACAUUUCUUCUGCAAGAAAAAAAACAAGAAGUUGGUGACUUUCAAGACCUCAGUCAUAGACUAAAG  
UUCUGUGACCACAGUGAGCAUAUJACUGCGGUAACCAGGGCAGUAAUGUCAAGACAAAGGUCAGGGUUGG  
CUUUAAAGAAAGAAGCCUGAGAACCGGAACUACAUAAGAGGCCAGAAAAUCAGUGUCUACAUGC UAAAGGCA  
AUUUUCAGGAACAAGUACCAGGAGCAGAUCAACAAAACAAAGAAGAUCAACAAAACAAAUAAAGGAAGGUG  
GUUUUAUGAACCCAGAGGGGCAGUGGUUAUGAGUUGUGGUGCCACUUUAUUC AACC UUAUCUGCUUGGAA  
GUUUUUCUCCUACACCAUUA AAACCCUCACUGAACC AAACUUUGUACAGACUGCAGCCAAGAAGGGCUGU  
AUUAUGGCUUUCUUGGACCUCUUAUCCACAAAAUAUUA AAAAUUGUAUUUCAUGA

>NR\_110798.1 Homo sapiens long intergenic non-protein coding RNA 1919 (LINC01919), long non-coding RNA  
GGCTCTCAAGCAAGGTCCACTTGCAGTGAAATAAACCCAGAGGTTTGAATCATGGCTTGATACGAAATTAT  
TGGAAAGAATATGGCGATGACATCCACAATGCCGGATAAAGAAAATATTTAGAAGATGAGATTCCCTGTGT  
TTCTGGCTTTCATAACTTTTTAGATTTCCCTTCTACTGGAAAACTTTTAACTTTGAAAACCGCAAGTAAT  
ATTTTTCTTCCTGAAACCTCTGCAGTGGTAGCAATGCACTGAAGTTTGATTAAAAGTTTACTGGTCATTCTG  
CTGCCATGAGAAGATGATAGAGAATATCACCACAGTGTGACTTGCTTCCAAGGCAGCATGGTTTCATGCA  
GAGGATCTAAACTGGGGACCATGTGCTGGGCTGCAAAAAGGGCTGTGCAGTGCCTAAAATGTTATGCAAAA  
TTTTATAAAGGTAGGTCATGTATTGCTCCATTGATGCTGCCCTTATTCATGATGATTAAAGCCTTTGGGA  
GGTATTCCTTCAGAATAATGGACAACCTTCGATAAGTACTGGTAAGAAAATAAGTAGAACTCTAAATTTG  
AAGTCTTC

RNA

>LINC01919

GGCUCUCAAGCAAGGUCCACUUGCAGUGAAAUAAACCAGAGGUUUGAAUCAUGGCUUGAUACGAAAUUAU  
UGGAAAGAAUAUGGCGAUGACAUCACAAUGCCGGAUAAAAGAAAUAUUUAGAAGAUAGAUUCCUGUGU  
UUCUGGCUUUCAUAAACUUUUUAGAUUUCCUUUCUACUGGAAAACUUUUAAACUUUGAAAACCGCAAGUAAU  
AUUUUUUCUCCUGAAAACUCUGCAGUGGUAGCAAUGCACUGAAGUUUGAUUAAAAGUUUACUGGUCAUUC  
CUGCCAUGAGAAGAUGAUAGAGAAUAUCACCACAGUGUGACUUGCUUCCAAGGCAGCAUGGUUUC AUGCA  
GAGGAUCUAAACUGGGGACCAUGUGCUGGGCUGCAAAAAGGGCUGUGCAGUGCCUAAAUGUU AUGCAAAA  
UUUUUAUAAAGGUAGGUCAUGUAUUGCUCCAUUGAUGCUGCCCUUAUUC AUGAUGAUUAAAGCCUUUGGGA  
GGUAUUCUUCAGAAUAAUGGACAACUUCGAUAAGUACUGGUAAGAAAAUAAGUAGAAACUCUAAAUUUG  
AAGUCUUC

>NR\_131977.1 Homo sapiens long intergenic non-protein coding RNA 1922 (LINC01922), long non-coding RNA  
GCCTCCCGGGTTCACGCCATTCTCCTGCCTCAGCGTCCCTGAGTAGCTGGGACCACAGGTGCCCCGCCACCA  
CGCCTGCTCAATGCGATGGAATACATTTCATGCCATTGTGCAACCTTTCACCACCGCCCATCTCCAGAACTC  
TCTTCATCCTGCAAAACTGAAACTCGGCCCCGGGTGCCCATCCCCCTCCCCGCCCCTGGCATCCACCCCTCT  
ACTTTCTGTCTCTCTGATCTTGACTGGAAGTAGGTATGTACTTAGTCCGCATTTTAAAGTGCAGAGCCCTG  
GGACCCAGTGAGACGGAGTCACGTGCCTGTGGTCACTCGATAGAAAAATGGCAAAGCTGGGCATCCACCCC  
GAGGTCTGTGTCCACAGCCCCCTGCCCTTGGCGGCCACTACACTGTGGCTTCTTTCAAGTGAGTGCTGAGGA  
GGAAAGGGGATTACGCTGCACAACCTCAGTGGTGAGATGAGATGAACGGGTGGAAACTAAACGTAAGGAA  
TGTAAGGGATGGGTGAAAAAGACGCCAGTGAGCCTCCTGGAAGGGCAGCAAGTTCACAGACATTCGAAGAA  
TCAAGGTCCTGAAAGGATGACCCAGCAGGGACAGGGCAGAGGGGACCCTGCCACAGCTGAGCGATGGCCT  
AGATGCTCGTTCTGGGTGCTGTCCCTTCTGGGACTCTAGCGAAACTGTTTTCTCTCTATTTCAGAGTCTG  
CCATTTCATTGGACTATAATGCCCCATTTTCATCTGATTGATGACCCAAATAGCTTCAAGTAGCTCTCCGCG  
GGTGGCCAGCCGCCCTGGAGGGTGTCCAGTTACAGGAGCTGAGCACACTGGACGCCTTTTCTCTTCCACA  
GTGGGCAATGCACGGTGGGTCCCCCTTGTGAGGATTAATGAGAGCTTTGGTTGCAGGGCCCCCCCCGCCCT  
GTTGCCACGTGACAGTCTCACAAGCTCACCCTGGGAAGAGAGGAGAGAAGCCCATCAGGTCACTGAAGTGG  
GCAGTAGAACCAGGAGAGGAAGAAAGAAAGGAGAGAGGGGGGAAGTGGATGCAGAGACAGAGCCATTGA  
AAGTGTTTTCCAACAATGGACTTGGATCGGCTTCCCCTGCCCCTGCCAGCAGGGAGCTCGCTGTGCCTGCA  
CTGCTGCAGTACTGACAAATTCATCCCTGTCCAAGGAGAGTGAAGTGAAGGTCCGTGAGGCGAGACCTGC  
TGGCACTCAGGGTACGTGGGGCCTGGCCCCATGTCCAAGTGCTCCCTCCTTACTGAGGAGTTGGGTGGCC  
AGGTGCAGCGGCAGTTTCTTAAGCCACGTTTCAGAGCTGAGTTACTGGGTTCCTGTGTGAGAAGGGAGCCC  
ACGCCCCGAGCCTGTGGAACAGGTCTCGGCTGGAGCAGGTGGTCTGTGCCCCCTCCTCACCCCATCTGTCTCT  
GGCTTGCTCTCACCTCGGCTTCTTGCCCTTCCAGGGCCCCCTGGTCTCATCCTCACCTTAAAGCAGGCCCC  
TCCACTGCTGAGCGCCTTCGCACTGAGATGCCCGCTGATCTTCCAGGACCCCTCATCTCCGTGGCTCTAAG  
CTGTTTCACCTTTCACCTTGACCCCCAGGAGGGCAGTGATGAAGGACAAAGAGCAACAACCTCTGCTGCCA  
GCACCAAAAAAGCCCTCTGCTGACTCCCTCAAGTCCTCTTTTGCAGATACCTACAAAGGGCCTTGAAAGAA  
AAAAAGAACTAGAATTACGAACAAAAA

RNA

>LINC01922

GCCUCCCGGGUUCACGCCAUUCUCCUGCCUCAGCGUCCUGAGUAGCUGGGACCACAGGUGCCCCGCCACCA  
CGCCUGCUCAAUGCGAUGGAAUACAUAUUGCAUUGGCAACCUUACCACCGCCCAUCUCCAGAACUC  
UCUUAUCCUGCAAAACUGAAACUCGGCCCCGGGUGCCCAUCCCCUCCCCGCCUGGCAUCCACCCUCU  
ACUUUCUGUCUCUCUGAUCUUGACUGGAAGUAGGUAUGUACUUAGUCCGCAUUUAAAAGUGCAGAGCCUG  
GGACCCAGUGAGACGGAGUCACGUGCCUGUGGUCACUCGAUAGAAAAUGGCAAAGCUGGGCAUCCACCC  
GAGGUCUGUGUCCACAGCCCCUGCCUUGGCGGCCACUACACUGUGGCUCUUAAGUGAGUGCUGAGGA  
GGAAAGGGGAUACGUCGACAAACUCAGUGGUGAGAUGAGAUGAACGGGUGGAAACUAAACGUAAGGAA  
UGUAAGGGAUGGGUGAAAAAGACGCCAGUGAGCCUCCUGGAAGGGCAGCAAGUCCCAGACAUUCGAAGAA  
UCAAGGUCCUGAAAGGAUGACCCAGCAGGGACAGGGCAGAGGGGACCCUGCCACAGCUGAGCGAUGGCCU  
AGAUGCUCGUUCUGGGUGCUGUCCUUCUGGGACUCUAGCGAAACUGUUUCCUCUCUAUUCAGAGUCUG  
CCAUAUUGGACUAUAAUGCCCCAUUUAUUGAUUGAUGACCCAAAUAGCUUCAAGUAGCUCUCCGCG  
GGUGGCCAGCCGCCUGGAGGGUGUCCAGUUACAGGAGCUGAGCACACUGGACGCCUUUUCUCUCCACA  
GUGGGCAAUGCACGGUGGGUCCCCCUUGUCAGGAUUAUAGAGAGCUUUGGUUGCAGGGCCCCCCCCGCCU  
GUUGCCACGUGACAGUCUCACAAGCUCACCCGGGAAGAGAGGAGAGAAGCCCAUCAGGUCACUGAAGUGG  
GCAGUAGAACCAGGAGAGGAAGAAAGAAAGGAGAGAGGGGGGAAGUGGAUGCAGAGACAGAGCCAUUGA  
AAGUGUUUCCAACAAGGACUUGGAUCGGCUUCCCCUGCCCCUGCAGCAGGGAGCUCGUGUGCCUGCA  
CUGCUGCAGUACUGACAAAUCAUCCUGUCCAAGGAGAGUGAAGUGAAGGUCCUGAGGCGAGACCUGC  
UGGCACUCAGGGUACGUGGGGCCUGGCCCAUGUCCAAGUGCUCCCUUACUGAGGAGUUGGGUUGCC  
AGGUGCAGCGGCAGUUUCUAAGCCACGUUCAGAGCUGAGUUACUGGGUUCUGUGUGAGAAGGGAGCCC  
ACGCCCCGAGCCUGUGGAACAGGUCUCGGCUGGAGCAGGUGGUCUGUGCCCCUCCUCACCCCAUCUGUCCU  
GGCUUGCUCUCACCCUGGCUUCCUGGCCUCCAGGGCCCUGGUCUCAUCCUCACCCUAAAGCAGGCCCC  
UCCACCUAGAGGCGCCUUCGCACUGAGAUGCCCGUGAUUCCAGGACCCUCAUCUCCGUGGCUCUAAG  
CUGUUCACCUUACCCUGGACCCCCAGGAGGGCAGUGGAUGAAGGACAAAGAGCAACAACUCUGCUGCCA  
GCACCAAAAAAGCCUCUGCUGACUCCCUCAAGUCCUCUUUGCAGAUACCUACAAAGGGCCUUGAAAGAA  
AAAAAGAACUAGAAUACGAACAAAAA

>NR\_033881.1 Homo sapiens long intergenic non-protein coding RNA 1924 (LINC01924), long non-coding RNA  
GGATATAGGTGGTACCTACATGGGAACACATTGTCTAATACCACCCAGAATGGGTAGCAAAGTTCATAGT  
GAAGTTTCCACTGTGAGCGGCAGGTGGCGGGCTCTTCTGAGAAAAGAAGCTTCTAGATGCATATTGTGGGG  
AGCAGATGAAACTCTGAGGCTTTCAGGGACGTGAGGTACGGTGCCAAGGCCACACCCTGAGACAGGGGT  
CTCACTATGTTGCCCAAACCTGGCCTTGATCTTCTGGGCTCAAGCAATCTTCCCACCTCAGCCTCCGAGTC  
GCTGGGATTGCAGATAAGGAAATTGAGGCTCAGTGTTGGCAGGTAACATGTTCAAGATCTTGAAACTAGC  
AGGTGGCAGAGCTGGGGTTCATCTGTCTCCATGTGCTCAGAATTCTGAGAGGAATTGCTGAAAAGGATGG  
GGA CTCTGAGCTACATATGCATAGCATTGATTTTCAGTGAGAAAACTACATATTTTTTGACCATATGAAAA  
AAATCTGTTCTTGAAATTTTGATGATATTTGCATAGTTTTTAAATTACCTCTGGCAGAAAAATTTATGTCAA  
AGATGAACCTAAACAAAAGGGAATGACATGTTGTTTGGATTACTGAGCCAGAGAAGCCGCTGGACCATTG  
AGATTTAGTAGGCAATATGTTTGCCAGCCTTTTTGAAAATTGGAATGTTATTTTTTGAACTTTATCGAAGA  
ACATGCTGCATCTCTAAGGCCTGCAAGATTATCTGTGCCCATCCCATTTATGGACTGCAAACCTACTTG  
ATTCTGTAGTAGCAGAGTTGAGATATAGGGTTCATCCATGTTGCTGCATGTGTCAGAATTTCTTCCGTCT  
TCAGGCTGAATAGTACTCCGTTGTATGTATATACCACATTTGGTCTATTTCATTTGTCTGTGATGGACAC  
GTAGACTGCTTCTTCTTTTGGCAACTGTGATAACCTGCTATGGACATGGATGTGCAAATAACAAGTAG  
CCCCTGTGTCTGCTGTTCTCTCTATGTGTTCTTGTGAAGAGAATGCTTCTCTAGCACGAGTTCAATATG  
ATCTGGGAATTTGAACTGGATCGGCTAAATACTTTATCAGTAGGAAGAAAACCTCTCTTACAGACTGAAA  
ATCATTCTGCACAGAAGCACATATGCGCATACTCACACACACACAGATGCCCTTCAAGTGAGGATGCCCTGA  
AGTAATTAAAGGTAATGTGTATCAAGCGTTAATTACAAAATCACTGTGCTCTTCTGAATTGTACACAATT  
ATCAGAGAAGCAGCACAAATATCATCATGCCACAAGGCTGCATTTCTTACCATGAGCTTTAACAATTTAT  
TTTCAGAACTTCACTTATCCATTAGTTATGCATGCATCTCTACACATTTCCCTATATGCCCTGGATTATTAG  
GTATACGCCATATCATGAAGGCTGTGAAAGTGATTACAAGAAAGTCAAAGATACCCAGATAGGATCTTTTC  
CTCAGAACCATTACTTATGCACATTCACCCACATTTGTAAACATAATATTGCAGCAAAAGGCTTGGGCT  
CCAGTCATTAGAGTAGCCACACTGCCAGGAATATATAACTTTATGTACTTTTTTTTTTTTATCATGGAA  
CATAAGGGACTATTTCATTCTGTAAATCCAGATCTTGTAAATTTTCAGTGTCTGATATAAGTCAGACTACTGG  
AAAGAAAAGAAATTTAATTAAAAATTAGAAAGGAAAAAAAAAAAA

RNA

>LINC01924

GGAUAUAGGUGGUACCUACAUGGGAACACAUUGUCUAAUACCACCCAGAAUGGGUAGCAAAGUUCAUAGU  
GAAGUUUCCACUGUGAGCGGCAGGUGGCGGGCUCUUCUGAGAAAAGAAGCUUCUAGAUGCAUAUUGUGGGG  
AGCAGAUGAAACUCUGAGGCUUUCAGGGACGUGAGGUACGGUGCCAAGGCCACACCACUGAGACAGGGGU  
CUCACUAUGUUGCCCAAACUGGCCUUGAUCUUCUGGGCUCAAGCAAUCUCCCACCUCAGCCUCCGAGUC  
GCUUGGGAUUGCAGAUAAAGGAAAUUGAGGCUCAGUGUUGGCAGGUAACAUGUUAAGAUUCUUGAAACUAGC  
AGGUGGCAGAGCUGGGGUUCAUCUGUCUCCAUGUGCUCAGAAUUCUGAGAGGAAUUGCUGAAAAGGAUGG  
GGACUCUGAGCUACAUAUGCAUAGCAUUGAUUUCAGUGAGAAAACUACAUAUJUUGACCAUAUGAAAAA  
AAUUCUGUUCUUGAAUJUUGAUGAUAUUGCAUAGUJUUAUAAUUAACCUCUGGCAGAAAAAUUAUGUCA  
AGAUGAACCUAAACAAAAGGGAAUGACAUGUUGUUGGAUUAUCUGAGCCAGAGAAGCCGUGGACCAUUG  
AGAUAUAGUAGGCAAUAUGUUGGCCAGCCUUUUUGAAAAUUGGAAUGUUAUUUUUGAACUUUAUCGAAGA  
ACAUGCUGCAUCUCUAAAGGCCUGCAAGAUUAUUCUGUGCCCAUCCAUUUUAUGGACUGCAAACUUAUUG  
AUUCCUGAUAGCAGAGUUGAGAUUAAGGGUUAUCCAUUGUUGCUGCAUGUGUCAGAAUJUUCUUCGUCU  
UCAGGCUGAAUAGUACUCCGUUGUAUGUAUAUACCACAUUUGGUCUAUUCAUJUUGUCUGUCGAUGGACAC  
GUAGACUGCUUCUUCUUUGGCAACUGUGAUAAACCUGCUAUGGACAUGGAUGUGCAAAUAACAAGUAG  
CCCCUGUGUCUGCUGUUCUCCUCUAUGUGUUCUUGUGAAGAGAAUGCUUCUCUAGCACGAGUUCAAUAUG  
AUCUGGGAAUJUUGAACUGGAUCGGCUAAAUAUCUUAUCAGUAGGAAGAAAACUCUCUUAACAGACUGAAA  
AUCAUUCUGCACAGAAGCACAUUAGCGCAUACUCACACACACAGAUGCCUUAAGUGAGGAUGCCUGA  
AGUAAUUAAGGUAAUGUGUAUCAAGCGUUAUUAACAAAACUACUGUGCUCUUCUGAAUUGUACACAAU  
AUCAGAGAAGCAGCACAAAUUCAUCAUGCCACAAGGCGCAUUAUCCAUAGAGCUUUAACAAUUAU  
UUUCAGAACUUCACUUAUCCAUUAGUUAUGCAUGCAUCUCUACACAUUCCCUAUAUGCCUGGAUUAUAG  
GUAUACGCCAUUAUCAUGAAGGCUGUGAAAGUGAUUACAAGAAAGUCAAGAUACCCAGAUAGGAUCUUUC  
CUCAGAAACCAUUUACUUAUGCACAUUCACCCACAUUUGUAAAACAUAAUAUUGCAGCAAAGGCUUGGGCU  
CCAGUCAUUCAGAGUAGCCACACUGCCCAGGAUAUAUAACUUUAUGUACUUUUUUUUUAUCAUGGAA  
CAUAAGGGACUAUUCAUUCUGUAAAUCCAGAUUUUGUAAUUCAGUGUCUGAUUAAGUCAGACUACUGG  
AAAGAAAAGAAUUAUUAUAAAAUAGAAAGGAAAAAAAAAAAA

>NR\_136505.1 Homo sapiens long intergenic non-protein coding RNA 1925  
(LINC01925), long non-coding RNA  
GGGCGCGTGGCCGAGGTCCGAGGAGGGCCCCGAGGTCTGGCCGAGGTCCGAGGAGGGGCCCCGAGGTCTG  
GCCGAGGTCCGAGGAGGGGCCCCGAGGTCTGGCCGAGGTCCGAGGAGGGGCCCCGAGGTCTGGCCGAGGT  
CCGAGGAGGGGCCCCGAGGTCTGGCCGAGGTCCGAGGAGGGGTCCGAGGTCTGGCCGAGGTCCGAGGAG  
GGCCCCGAGGTCTGGCCGAGGTCCGAGGAGGGCCCCGAGGTCTGGCCGAGGTGATAATAGTTAAGCCTAG  
AGCCATGAGAGGCCTGTGCTCCGTGGGACAGGAGGCTAAGAGCGGAACAGGGCCCACTGTTGGATGCTAC  
TGATCACCAGACTGTGGCCTTTATACACATCAACTTGCTTCATCTCCACCAGAACAAATGAATGACAAAA  
CCCGATGAAAAGACAAAAGCCAGAGTAAATCCCTTCTCATCTATGTCACGGCAAAAGATATAGTAACAGCAA  
AAACAAGCTC

RNA

>LINC01925

GGGCGCGUGGCCGAGGUCCGAGGAGGGCCCCGAGGUCUGGCCGAGGUCCGAGGAGGGGCCCCGAGGUCUG  
GCCGAGGUCCGAGGAGGGGCCCCGAGGUCUGGCCGAGGUCCGAGGAGGGGCCCCGAGGUCUGGCCGAGGU  
CCGAGGAGGGGCCCCGAGGUCUGGCCGAGGUCCGAGGAGGGGUCCGAGGUCUGGCCGAGGUCCGAGGAG  
GGCCCCGAGGUCUGGCCGAGGUCCGAGGAGGGCCCCGAGGUCUGGCCGAGGUGAUAAUAGUUAAGCCUAG  
AGCCAUGAGAGGCCUGUGCUCCGUGGGACAGGAGGCUAAGAGCGGAACAGGGCCACUGUUGGAUGCUAC  
UGAUCACCAGACUGUGGCCUUUAUACACAUCAACUUGCUUCAUCUCCACCAGAACAAUGAAUGACAAAA  
CCCGAUGAAAAGACAAAAGCCAGAGUAAAUCCCUUCUCAUCUAUGUCACGGCAAAAGAUUAUAGUAACAGCAA  
AAACAAGCUC



>NR\_146904.1 Homo sapiens long intergenic non-protein coding RNA 1926  
(LINC01926), long non-coding RNA  
CATCACAGTCCCAAGAATAACACAAGAAATTCTCCAAGTTTCCAAGAAGGGAAGATGGAGTGGAGGGCGC  
CCACCCATATCTCCAGTGGACATCCCCTGGGCTACTCCTCTCCTGATGAGAAAATGCTCACTTCAGCCAAG  
TGCAGAAATGGTCCCCTTTGTTTTCTGTGGGTATCAGTGGAGAATGAGATCCTTCATATGGAATCTCCCTGT  
GTTGCTCAGGCTGATCTCGAACTCCTGAGCCCAAGCATGCATCAGCCTCTCAGTAGCTGTGATTACAGGC  
ATTGAGTCACCACTCCTGAGAAATAACAGGACTTTGGTGCTATTCTCCAAGCTGAAAGCCATCCTCTTCG  
GCCCTGAGGACACAGCTTTTTCTGCCATAACTCACTGTCTCCACTGGCTCAATTAGCCAATTAGTGGCAT  
TGTAAGAGGGCTGAGATGTTACTTTTTTAGTTTCCAATAAAATTCTCAAGTTGGTTTCAAAAAAAAAAAAAA  
A

RNA

>LINC01926  
CAUCACAGUCCCAAGAAUAAACAAGAAAUUCUCCAAGUUUCCAAGAAGGGAAGAUGGAGUGGAGGGCGC  
CCACCCUAUCUCCAGUGGACAUCCCCUGGGCUACUCCUCUCCUGAUGAGAAAAUGCUCACUUCAGCCAAG  
UGCAGAAUGGUCCCCUUGUUUUCGUGGGUAUCAGUGGAGAAUGAGAUCUUAUAUGGAAUCUCCUGU  
GUUGCUCAGGCUGAUCUCGAACUCCUGAGCCCAAGCAUGCAUCAGCCUCUCAGUAGCUGUGAUUACAGGC  
AUUGAGUCACCACUCCUGAGAAAUAAACAGGACUUUGGUGCUAUUCUCCAAGCUGAAAGCCAUCUUCUUG  
GCCCUGAGGACACAGCUUUUUCUGCCAUAACUCACUGUCUCCACUGGCUCAAUUAAGCCAAUUAUGGGCAU  
UGUAGAGGGCUGAGAUGUUAUUUAGUUUCCAAUAAAAUUCUCAAGUUGGUUUAACAAAAAAAAAAAAA  
A

>NR\_146901.1 Homo sapiens long intergenic non-protein coding RNA 1928  
(LINC01928), long non-coding RNA  
AATTGGCAAACATTTTCTCTAAAGCTCAACACAGTAAATATTTTAAGCTTTACAGGGCCATACCAAACAG  
GTGCTGGACCAGACCTGGACTCCCTGGGGCCACAGAGCTTCATTTGAACTAAGTAGAAGACTGCTCTGGT  
TAGGGAGGCAATCGGTAAAGAAAATGAAGCATCCATCTAGCATCATCCCCTGGGAGGAAAGAAGGAGAC  
CAAAAGAAGGTAAACAATAGCAAAAAAATCTCTGAAGGAGTAAATCAAGATGGAGTTGATGGATAAGGAG  
GAATAAACTACTCCAATTATCTGGAACCTACACTAAATGAAAAGCAAGTCTCCAAGATAGAAGCTGAGC  
ATGACAAACAAATGCTGACAATATCAGGTAGTGCTTCAGTTCAACTATGAGGGATTCTTTCTCCCACAAC  
TTCCCTACTCCAGGAACTTGGAAAAGTGGATCATCTCTGACAGCTAAATTCCAAAACAAACACTTAGCAGA  
TTGGAACATAATTA

RNA

>LINC01928

AAUUGGCAAACAUUUUCUCUAAAGCUC AACACAGUAAAUAUUUUAAGCUUUACAGGGCCAUACCAAACAG  
GUGCUGGACCAGACCUGGACUCCUGGGGCCACAGAGCUUCAUUUGAACUAAGUAGAAGACUGCUCUGGU  
UAGGGAGGCAAUCGGUAAAAGAAAAUGAAGCAUCCAUCUAGCAUCAUCCACUGGGAGGAAAGAAGGAGAC  
CAAAAGAAGGUAAAACAAUAGCAAAAAAUCUCUGAAGGAGUAAAUCAAGAUGGAGUUGAUGGAUAAGGAG  
GAAUAAAACUACUCCAAUUAUCUGGAACUUACACUAAAUGAAAAGCAAGUCUCCAAGAUAGAAGCUGAGC  
AUGACAAACAAAUGCUGACAAUAUCAGGUAGUGCUUCAGUUC AACUAUGAGGGAUUCUUUCUCCACAAC  
UUCCCUACUCCAGGAACUUGGAAAAGUGGAUCAUCUCUGACAGCUAAAUCCAAAACAAACACUUAGCAGA  
UUGGAACAUAAUUA

>NR\_110743.1 Homo sapiens long intergenic non-protein coding RNA 1929 (LINC01929), long non-coding RNA  
GTGTTTGTCTCCTGGGATGCTGTGGGGTTGACCCCTGGATAGCATTCACGGTCATTAGCTCATGGTGTCTCT  
TGGGAGACATTTGAAGTCAGCTGGTGTCTGCTGATGGAGCTGCTGAGTTCAGCATCACATCGACATAAT  
TTCATGATGCGTTTGCATGAAGGGCTTTGGTGCCATTTCTGAGTGAGACTTCAGAAGCCCTCCTGAATCCT  
ATTCTGGCCCATCGTGGCATGGTCAGCAGATGAGAAAACAGATGGACTGGTGTGTGGTGGGAGGAAGCTGT  
CCTGGTCGAGCTCTGCTTCAGGCCAGTCCCTTTCTGAGATTGGAGAAGTGAGAAGAGGAGCAGAGAGACCA  
GCTGGGAGCTGCTGTAGTAACCCAGGTGAGGGAGATGGTGGTCTGGACCACTGCTTCGCATGGAGGTGGA  
CAGAAGTGATATAAAGTATTTAAGTCAACCCAGCTGCTTGATCCAAATAATGCCAAATGAGTTTATTGCCA  
TCTCTTCATATTTTACAACCCAGATCACTTCTGCATAAAACCACATGGAAGAATAAGAAGGGAAAAACAAT  
CAAGCAATAAACTGTTTCATCTGAAAAATAGTTAAATTTCTCCAACAGTTGATTTTAAATATTTTCTTAAAA  
TCTATTAAGATTTGTTCAAAGTAATTTCTCTATGGAGGCACATCTCTGGACTGAAACAACCAGCCTTTGTC  
CTTTGGTGTGGTCTGTCTTTCAGTCAAAAATGGCTAACAGGCTATGAAGAAAATCAAATTTCCAAGTTACTCA  
AATGTGGAGAAAAATCTGGAGGTCTGGTATGGGCATCTTTTCAAATGTTTTAATTACACATTGATTTACA  
AATGACATTGTCTAGTATGGTAGTTTAAAAAAATCATCATTTTAAACATCTGCCAAATTTTAAATGGT  
AGTTTTTTCATGAAAGTACAAAGAAAACCTTCATCCACGATCACGAAATTTTCCAACCTCATATATCCTGATC  
AAAACAAAGACTTTCTATGGACAATTTGTTGAACCACGCCTGACCTTGGACCCCTGTGCTATCTACTCTTCT  
CAGTGTCACTTCTCTATCTAGTTTGGCTTTTCCAAGTTTAAATCACTAAGATATTCAGATATTAATACAAAA  
TATTATTACAAGCCCTTTAATTACCTTGATAATATTACTGGCAATATTA AAAACTTTTAGCAGTATCTTT  
CATGGTGTGTGCTTTGCTGAAAAGGAAAGATATCTCTGATTAAAGTTTGAAACCATTAATAATATAGAA  
CACCATACAAATGACACTTTTCCAAATTAGAAATTTAAGATCAAAGATTATTTACGGGCTTATATTTGT  
ATCTAATTTTAACATTTTATGTAGAGAAGAGGTCTCGCTGTACTGCACAGGCCAATCTCAAACCTCTGA  
CTTCAAGCTATCCTCTGCCTCAATCTTTTATTTACTTTTAAATGCTATTCTTTTGTTCACTTTGTCTGAGAT  
ATCTAGGTCAAAGCCTAAAGGCTATGTATTTTAAATTTCAAGGCTGCATGTTTATATCTCTCATACCACT  
AACATCCTGGCTAATGCTCTTAATGACTAATTTTTCAGTCTTTTACCACGGAATTGTCTTGAAGTTGGTGC  
ATATTTTACAGACTCCAATCTGAAGTGTGGATCACAGCATTTGTTAGAACTAGTTGACTTTGACTCTTT  
TTCACTCTGAGATAGAATCTAATTGGACCTGTTATCTTGATTTTATTTGGTCAAAGCTTTTCACTTCAGGC  
CTCCTAATAGGATGCTGACCAGCCAATGGAATGTTTGCCTTTGGTCAAGTGTTCACCCCTCTGGTCCAATT  
AGCCGAGGCCAAAATGTAGTAGGGAATTGTAGCCAAAGAAATGGATAAGGAATTTCTAAGGCAGTCTTGC  
TCAGCAGGTGCTATGTGAGTTTGTAGAAAGTTTGTGGTTGTGATAATTGCTCTAAGGGTTGGCCCATAC  
TGCGTATGATCTAAGGATCTAAGAAATAATTTATTTACCAAAGTAGCAAAGAACTTCTTGTAAATAACCTC  
TGACAAATATTTTATTTGCGTGTACCTTAAAGATAGCAGTACAGTGAAGCTCCAGTAACTGAAAAGAT  
CCTGGATTGGTATTAAGAAATTAGAGTTAAAGGCTTATGTAAGTGTCTTATAGATAATTTTAGGCAAAGC  
AGTCTTGAAAATAAATTTCTGCTAATCAGTTTAAAGAAACAGTTGAATATTTTTTAAATAGCAAGAGCACTAGT  
CTTAGAATCAGGAACCATGGGTTGGCTCTGAGACTCTCTGTCTCATCTTGGGGAAATCATTTTCACTTTT  
TGGCCCCACCCGGTGTTTTCCCGGAGCCCATAGATGAATGTTGTAAATAGGCTACTTCTACTTCTAAAGC  
ATCCTTGATCTGAAATTTGAGAAAACAGAACTGAGAATCAAATGAAATAAAAGCTTGAATAGATGTTAGG  
AGACCAAAAAAAAAAAAAAAAAAGCCAGAGAGAAATTTATTTATAGAGCATTCACATATGATATCCCGTGCCTT  
TACACATGTTGACTTCTCATTCCTCAGAGAAAGGCTCTGAGGTTGTATCCAGTTTACAGTAGAAAAACAGG  
TAAGATACTTGTCCCGAGCCATACAACTGTAAACAGTGGAGTCAACCAATTTTGTTTAGCGAAAAGAA  
TAATAAAGCTTCTTCATCATACCAAATTTCTCTTAAATGCAGGGAGAAACAATGCTTATGGAAAAATA  
GAGGCAGGTAAAGGAGGAGTAAATGTTTACGAGGAAATTAACAGCATTTTCTACTAAATGATGTGGAGCTT  
GGGTTGAGAATGCTGATATATGACTCAGAAATTCAAACCTTTTGCACCTGATTGTTTTTCACTTAGATTTTAT  
GAAAAGCTGTAGGTGTGTGAGTTAACGAGGAATGCTTCACTGCTTCCCTGGTCTATGCATAAACATCTACAT  
GCAAAAACAGCAAGGAGTGTCTGTCTTATCACAGCTGCAGTCAAGCCAACAAAACCTGTTTCTACCCTGAG  
GATGAAATTTGTAAATTTTCTCTCAAAAAATAAAATAAGCCTCTTGTGTTGATTGCC

RNA

>LINC01929

GUGUUUGUCUCCUGGGAUGCUGUGGGGUUGACCCUGGAUAGCAUUCACGGUCAUUAAGCUCAUGGUGUUCU  
UGGGAGACAUUUGAAGUCAGCUGGUGUCCUGCUGAUGGAGCUGCUGAGUUCAGCAUCACAUCGACAUAAU  
UUCAUGAUGCGUUUGCAUGAAGGGCUUUGGUGCCAUUUUCUGAGUGAGACUUCAGAAGCCUCCUGAAUCCU  
AUUCUGGCCCAUCGUGGCAUGGUCAGCAGAUAGAGAAACAGAUGGACUGGUGUGUGGUGGGAGGAAGCUGU  
CCUGGUCGAGCUCUGCUUCAGGCCAGUCCUUUCUGAGAUUGGAGAAGUGAGAAGAGGAGCAGAGAGACCA  
GCUGGGAGCUGCUGUAGUAACCCAGGUGAGGGAGAUGGUGGUCUGGACCAGUGCUUCGCAUGGAGGUGGA  
CAGAAGUGAUUAACUGAUUUUAGUCAACCAGCUGCUUGAUCCAAAUAAUGCCAAUAGAGUUUAUUGCCA  
UCUCUUCAUUUUUACAACCCAGAUCAUUCUGCAUAAAACCAUUGGAAGAAUUAAGAAGGGAAAAACA  
CAAGCAAUAAAACUGUUCUUGAAAAUAGUUUAAUUCUCCAAACAGUUGAUUUUUAAAAUUAUUUCCUAAAA  
UCUAUUUAGAUUUUGUUCAAAGUAAUUCUUAUGGAGGCACAUUCUGGACUGAAACAACCCAGCCUUUGC  
CUUUGGUGUGGUCUCCUGUUUCAGUCAAAAAUGGCUAACAGGCUAUGAAGAAAAUCAAAUCCAAGUUACUCA  
AAUGUGGAGAAAAUCUGGAGGUCUGGUAUGGGCAUCUUUUCAAAAUGUUUAAUUAACAUUGAUUUUACA  
AAUGACAUUGUCUAGUAUGGUAGUUUUAAAAAAUACAUAUUUUAAACAUUCGCCAAAUUUUAAAUGGU  
AGUUUUUACAUGAAAGUACAAAGAAAAUUAUCCACGAUCACGAAAUUUUCCAACUCAUAUAUCCUGAUC  
AAAACAAAGACUUUCUAUGGACAAUUGUUGAACCCAGCCUGACCUGGACCCUGUGCUAUCUACUCUUCU

CAGUGUCAUUCUCUAUCUAGUUUGGCUUUUCCAAGUUUAAUCACUAAGAUAUUCAGAUAUUAUUACAAAA  
UAUUAAUACAAGCCCUUUAAUUAACCUUGAUAAUUAUACUGGCCAAUAUUAAAAACUUUUAGCAGUAUCUUU  
CAUGGUGUGUGCUUUGCCUGAAAAAGGAAAGAUUUCUGAUUAAAGUUUGAAACCAUUAUAUAUAGAA  
CACCAUACAAAUGACACUUUUCCAAUUAGAAAUUUUAAGAUCAAAGAUUAUUUACGGGCUUUAUUUGU  
AUCUAAUUUUAAUUAUUUUAUGUAGAGAAGAGGUCUCGCGUACUGCACAGGCCAAUCUCAAACUCCUGA  
CUUCAAGCUAUCCUCCUGCCUCAAUUCUUUUUAUUUACUUUUAAUGCUAUUCUUUGUUACUUUGCUGAGAU  
AUCUAGGUCAAAAGCCUAAAGGCUAUGUAUUUUAAUUUUAAGGCUGCAUGUUUAUAUCCUCUCAUACCACU  
AACAUCCUGGCUAAUUGUCUUAAUGACUAAUUUUUUCCAGUUUUUACCACGGAAUUGUCUUGAAGUUGGUGC  
AUAUUUCACAGACUCCAAUCUGAAGUGUGGAUCACAGCAUUUGUUAGAAACUAGUUGACUUUGACUCUUU  
UUCACUCUGAGAUAGAAUCUAAUUGGACCUGUUUAUCUUGAUUUUUUAUUGGUCAAAGCUUUCAUUUCAGGC  
CUCCUAAUAGGAUGCUGACCAGCCAAUGGAAUGUUUGCCUUUGGUCAGGUGUUCACCCUCUGGUCCAAUU  
AGCCGAGGCCAAAAUGUAGUAGGGAAUUGUAGCCAAAGAAUGGAUAAGGAAUUCUUAAGGCAGUCUUGC  
UCAGCAGGUGCUAUGUCAGUUUUUAGAAGAGUUUGUGGUUGUGAUAAUUGCUCUAAGGGUUGGCCCCAUAC  
UGCGUAUGAUCUAAGGAUCUAAGAAUAAUUUAUUACCAAAGUAGCAAAGAACUUCUUGUAAAUAACCUC  
UGACAAAUUUUUUUUAUUGGCGUGUACCCUAAAGAUAGCAGUACAGUGAAGCUCCAGUAACUGAAAAGAU  
CCUGGAUUGGUAAUUAAGAAAUUAAGAGUUAAAGGCUUUAUGUAACUGUCUUUAUAGAUAAUUUUAGGCCAAAGC  
AGUCUUUGAAAUAUUUUCUGCUAAUCAGUUAAAAGAAACAGUUUGAAUAUUUUUUAAUAGCAAGAGCACUAGU  
CUUAGAAUCAGGAACCAUGGGUUGGCUCUGAGACUCUCUGUCUCAUCUUGGGGAAUCAUUUCAGCUUUC  
UGGCCCCACCCGGUGUUUUCGCGAGCCCAUAGAUGAAUGUUGUAAUAGGCUACUUCUACUUCUAAAAGC  
AUCCUUGAUCUGAAAUUUGAGAAACAGAACUGAGAAUCAAAAUGAAUAAAAGCUUGAAUAGAUGUUAGG  
AGACCAAAAAAAAAAAAAAAAAAGCCAGAGAGAAAUAUUUAUAGAGCAUUCACUAUGAUAUCCCGUGCGCUU  
UACACAUGUUGACUUCUCAUUCUCAGAGAAAGGCUCUGAGGUUGUAUCCAGUUUACAGUAGAAAAACAGG  
UAAGAUACCUUGCCCCAGCCAUAACAACUGUAAACAGUGGAGUCAACCCAAUUUUUGUUUAGCGAAAAGAA  
UAAUAAAAGUGCUUUCUACUAUACCAAUUCUUCUUAAAUGCAGGGAGAAACAAUGCUUAUGGAAAAAUUA  
GAGGCAGGUAAAAAAAAAACAGUAAUGUUUUACGAAGAAAUAACAGCAUUUUCACUAAAUGAUGUGGAGCUU  
GGGUUGAGAAUGCUGAUUAUAUGACUCAGAAUUCAAACCUUUUGCACUGAUUGUUUUACUUAGAUUUUUAU  
GAAAGCUGUAGGUGUGUGAGUUAAACGAGGAAUGCUUCAGCACUUCUCCUGGUCAUGCAUAAACAUUCACAU  
GCAAAACAGCAAGGAGUGCUCUGUUUAUCACAGCUGCAGUCAAGCCAACAAAACUGUUUCUACCACUGAG  
GAUGAAAUUUGUAAAAUUUUCUCUCAAAAAAUAAAAUAAGCCUCUUGUUUGAUUGCC

>NR\_149137.1 Homo sapiens long intergenic non-protein coding RNA 2564 (LINC02564), transcript variant 1, long non-coding RNA  
GGGCGATGCTCCCCGGGTAGGACAAACCGGTCACCTGGGCTGCGAGGGCGGCTTAGGGGCAGAAGCGGCG  
GTCCAGGGCCGCCTGGCGCAGCAGCCTGTCCCAGCCGCGGTCCCTGCAGTCCCTCCCTGGCGGCTGCGCA  
GCCGTCCCACGACAGGGGGCCATAAACTCTCCAGAGCGGAAAGCCGCACCCCTGGTGGCCCCGGCCCCGCGCC  
CAGACCTGGCGGGCCGCTGGCACCTGACCCGCTGCATGGGTCTCCAGGGAGCTCGCTGCCACCCGGCGCT  
GCAGGCTCGGCTCCCTCGTACACTCTCTGGCAAGCCCAAGAAAGTCAGGGGCCCTATGTGAGCCAAAGAGG  
AGAGAAGGTGATGCCTCAGCCCAGTGTCTTCTGCCCCACCTCGCTTGTGGCCTTCGGAACCTTGATTTGCAC  
CGCAGGAAAAATGGGCAATGAAAAACCCCTCCCTAACTGGCTTCTCAGTCCACTCTGACCAGCCCACTGCAC  
AGCGCCCAACCTGCAGCTCCAGATGAGGCCCTCACTCTGTCAACCCAGGTTGGGGTGGAGTGGCACAGTCAC  
AGCTCACTATAACCTCAAGCTCCTGGGCTCAAGTGATCCTGCCACCTCAGCCTCCTAAGTAGCTGGAACT  
ACAGATGTGCACTGCCATGCCAGGCTTGTCTAACATTTTTTATGTGTTGCTTCATCCAGTTTGCTAGAGTT  
TTTGGAGATTTCTGTCTTCATTCATGAGGGATAATAGTCTGCACTTTTATTTTCTTGTGATACTTTTGTCTC  
TGATTTGTTATCTGGGTAATACTGGCCTTGAAAAATGAATTGATGTTTTCTCTGCTTC

RNA

>LINC02564

GGGCGAUGCUCUCCCCGGGUAGGACAAACCGGUCACCUGGGCUGCGAGGGCGGCUUAGGGGCAGAAGCGGCG  
GUCCAGGGCCGCUCUGGCGCAGCAGCCUGUCCCAGCCGCGGUCCCUGCAGUCCCUGCCUGGCGGCUGCGCA  
GCCGUCCCACGACAGGGGGCCAUAAACUCUCCAGAGCGGAAAGCCGCACCCUGGUGGCCCGGCCCCGCGCC  
CAGACCUGGCGGGCCGCUGGCACCUGACCCGCUCAUGGGUCUCCAGGGAGCUCGCUGCCACCCGGCGCU  
GCAGGCUCCGCUCCUCGUACACUCUCUGGCAAGCCCAAGAAAGUCAGGGGCCUAUGUGAGCCAAAGAGG  
AGAGAAGGUGAUGCCUCAGCCCAGUGUUUCUGCCCCACCUCGCUUGUGGCCUUCGGAACUUGAUUUGCAC  
CGCAGGAAAAAUGGGCAAUGAAAAACCCUCCUAACUGGCUUCUCAGUCCACUCUGACCAGCCACUGCAC  
AGCGCCCAACCUGCAGCUCCAGAUAGAGGCCUCACUCUGUCACCCAGGUUGGGGUGGAGUGGCACAGUCAC  
AGCUCACUAUAACCUCAAGCUCCUGGGCUCAAGUGAUCCUGCCACCUCAGCCUCCUAAGUAGCUGGAACU  
ACAGAUGUGCACUGCCAUGCCAGGCUUGUCUAACAUAUUUUUAUGUGUUGCUUCAUCCAGUUUGCUAGAGUU  
UUUGGAGAUUUCUGUCUUAUUAUGAGGGAUAAUAGUCUGCACUUUUUAUUUCUUGUGAUACUUUUGUC  
UGAUUUGUUAUCUGGGUAAUACUGGCCUUGAAAAUGAAUUGAUGUUUCCUGCUUC

>NR\_149129.1 Homo sapiens long intergenic non-protein coding RNA 2565  
(LINC02565), long non-coding RNA  
GCCTCCAGAGCTATCTTTGCTTGAAAAGAAATGAAACTTCAGGAATGAAAGTTTGCACATAAAGCAAGCCCA  
TGAGAAAGACATTTCTGGGAAAACTAGAATCCTGTTAAGTTATGGGATTTTTTTTCAAGCCACATGGTTGAT  
AAGTAGTCTGACCAGGATCCTGGAGCAACACAAGGAAGACAAGGACCCCTGAAGACAAGGCAGCCTTGAA  
ACCAAATGAAGCCCTGGGCCAGTGAGCATGGCAAGAGGAAGACTGTTAATTGCGAGAAAGCTGGGTCTTG  
AAGATGATTCCATATCAACATACAGGGAGTTCCACCACCTGAATGGTCTATCGGTTGGGAATGCCATCATT  
TATTTTCAACCAGTGGGGAAGAATTGGTATTAATATCAAAACCACAGTACTGTCATACCCAGCTATAATTT  
GCAATGTTTATATGCCTGTACGAATGAATAATTAACAGTTAAATGAATCAATATATAT

RNA

>LINC02565

GCCUCCAGAGCUAUCUUUGCUUGAAAAGAAUGAAACUUCAGGAUUGAAAGUUUGCACAUAAAGCAAGCCCA  
UGAGAAAGACAUUUCGGGAAAAACUAGAAUCCUGUUAAAGUUUAUGGGAUUUUUUUCAAGCCACAUGGUUGAU  
AAGUAGUCUGACCAGGAUCCUGGAGCAACACAAGGAAGACAAGGACCCUUGAAGACAAGGCAGCCUUGAA  
ACCAAUGAAGCCCUGGGCCAGUGAGCAUGGCAAGAGGAAGACUGUUAAUUGCGAGAAAGCUGGGUCUUG  
AAGAUGAUUCCAUAUCAACAUAACAGGGAGUUCACCACUGAAUGGUCUAUCGGUUGGGAAUGCCAUAU  
UAUUUUCACCAGUGGGGAAGAAUUGGUUAUUAUAUCAAACCACAGUACUGUCAUACCCAGCUAUAUUU  
GCAAUGUUUAUAUGCCUGUACGAAUGAAUAAUUAACAGUUAAAUGAAUCAUAUAUAU

>NR\_038340.1 Homo sapiens long intergenic non-protein coding RNA 2582 (LINC02582), long non-coding RNA  
GCTGACTCTCTTTTCGGACTCAGCCCGCCTGCACCCAGGTGAAATAAACAGCCATGTTGCTCACACAAAG  
CCTGTTTGGTGGTCTCTTCACAGGGACACGGATGAAATTTGGTGCCGTGACTCGGATCGGGGAACCTCCC  
TTAGGAGATCAATCCCCTGTACTCCTTTCTTTGCCCTGTGAGAAAAGATCCACCTATGACCTCAGGTCCCT  
CAGACCGACCAGCCCAAGGAACATCTCACCAATTTTAAATCAGACCTTGAAGATTTGTTGTTCAAGGAGA  
AACTGAAGAGCAAGAAGGAAAGTGAGAGCCAGCAATACCAGCAGAGCCAGATCTGAGCTGGGAGAAGGGG  
AGAAAAGTTTGTGAAGAGGAGATCGGTGACCTGGGCTCCTTATGTGCCTGAAAGAGTTTGAGTTTCCTGTT  
AACTCCAAATCAACAGTATTTTCAACAAGAAAATGTGCAATTGAAATCAAGTGCTGTTTAAGTGCAGCTAG  
GATTTCCACAGGAAGACACTTGCAGTGAAACAGAGTTATGGAGCAGCAAAAACACAGATCTATTTGGAAAA  
AGAGAAAAACATATGCGTTGTATTTTGCTTCAATTATAAAAATACCATCCTCTCAAAGGTGGTTCTAAATTA  
CAAAGGACTTTGATTTCTAGGTAGATTCTGGGTAGAGACTTCCTTTTCATATTGAGGCATTAATGACACCT  
TTTAACCTGGGAAGCAATATGACTGGAGTTGTACTTTGAGAAGATTAATCAGGTTTGGTTGCAGAATGAA  
AGAGAAGATGAAGTCAAGAGATTGGTTTAGAGGCTCTAGCAGAAGCTTAGTCATATTTCAAATGATCAA  
ATATCAAGAAAAATTTCTGAGCTGCATAACTTGTATAAAGTAATTTTTCAGTGATTTTTTTTCATGGTTATGA  
TAAAAGAACTGGATTAGCAGAACTTTTACCCTGAATCAAGATTTAATTTTTTCTTTGAGCTCATCTTAAG  
GATATCGGAACATAGGGAGCAAACGATGGTGTGGCTGCCTCAGTGCTTGATTTTTTAACGGTTTTTGAAGAG  
AATAGTTACATTTCTTCTCCTAGTAAGAACTAATAAATACATTAACAGAAATGAATTCCTTATCCCTTTG  
TACACTGGTCTATTTCTTCAAAACATTAAATACTATTGATAAGATATCACCTTTTAAAAAA

RNA

>LINC02582

GCUGACUCUCUUUCGGACUCAGCCCGCCUGCACCCAGGUGAAAUAACAGCCAUGUUGCUCACACAAAG  
CCUGUUUGGUGGUCUCUUCACAGGGACACGGAUGAAAUUUGGUGCCGUGACUCGGAUCGGGGAACCUCC  
UUAGGAGAUCAAUCCCCUGUACUCCUUUUCUUUGCCUGUGAGAAAGAUCCACCUAUGACCUCAGGUCCU  
CAGACCGACCAGCCCAAGGAACAUCUCACCAAUUUUAAAUCAGACCUUGAAGAUUUUGUUGUUAAGGAGA  
AACUGAAGAGCAAGAAGGAAAAGUGAGAGCCAGCAAUACCAGCAGAGCCAGAUUCUGAGCUGGGAGAAGGGG  
AGAAAGUUUGUGAAGAGGAGAUUCGGUGACCUGGGCUCCUUAUGUGCCUGAAAGAGUUUGAGUUUCUGUU  
AACUCCAAAUCAACAGUAUUUUAACAAGAAAUGUGCAAUUGAAAUCAAGUGCUGUUUAAGUGCAGCUAG  
GAUUUCCACAGGAAGACACUUGCAGUGAACAGAGUUAUGGAGCAGCAAAAACACAGAUCAUUUGGAAAA  
AGAGAAAACAUAUGCGUUGUAUUUUGCUUCAAUUAUAAAAUACCAUCCUCUCAAAGGUGGUUCUAAAUUA  
CAAAGGACUUUGAUUUUCUAGGUAGAUUCUGGGUAGAGACUUCUUUCAUAUUGAGGCAUUAUGACACCU  
UUUAACCUGGGGAAGCAAUAUGACUGGAGUUGUACUUUGAGAAGAUUAUCAGGUUUGGUUGCAGAAUGAA  
AGAGAAGAUGAAGUCAAGAGAUUGGUUUAGAGGCUCUAGCAGAAGCUUAGUCAUAUUUCAAUAUGAUCAA  
AUAUCAAGAAAAAUUCUGAGCUGCAUAAAUUGUAUAAAGUAAUUUUCAGUGAUUUUUUUAUGGUUAUGA  
UAAAAGAACUGGAUUAAGCAGAAAACUUUUACCCUGAAUCAAGAUUUAUUUUUUCUUUGAGCUCUUAAG  
GAUAUCGGAACAUAGGGAGCAAACGAUGGUGUGGCUGCCUCAGUGCUGAUUUUUAACGGUUUUGAAGAG  
AAUAGUUACAUUUCUUCUCCUAGUAAGAACUAAUAAAUACAUAUACAGAAUUGAAUCCCUAUCUUUUG  
UACACUGGUCUAUUUCUCAAACAUAUAAAUACUAUUGAUAGAUAUCACCUUUUAAAAAA

>NR\_183516.1 Homo sapiens long intergenic non-protein coding RNA 2837 (LINC02837), transcript variant 1, long non-coding RNA  
ATTCTCTGGGAGGTGTCTGGGAAGCACATCGCAGTGTGCACCGCAGCAGGGCTTGATCCACCACATCACAT  
TCCGCGCTCGCTGCTGCCTGAACTCATCAAAGTGGACCCAGTGAAAGCTGTGTTGAGGAGGACTATTCTG  
GTGCTGAGGCTGGGTACATTTCATGAGGCCAGGAACACGGGATTGAATTCCAAGCAGAGCACCAGGATAACC  
TGTAGCAGAAATCCAGGCAAGAGCCAAGAAGATGGGAACGGAAATAGCAAGCGCTGAATTAATTAATTAAT  
TAATTAATTTTTTGTAGATGGAGTCTTGCTCTGTGCGCCAGGCTGGAGTGCAGTGGTGTAAATGTTGGCTCA  
CTGCAACCTCCCCCTCCGGGGTTCAAGCGATTCTCCTGCCTCAGCCTCCCAAGTAGCTAGGATTACAGGT  
GCCCCGCCACCATGCTCGGCTAATTTTTTGTATTTTTTAGTAGAGACGAGGTTTCGCCATGTTGGCCAGGCT  
GGTCTGGAACCTCTGACCTCAAGTGATTGGCCGGCCTTGGGCAAGTGCTGAATTTAAACACGGCTCTCCT  
GAGGACTTCTATTGGGTTCTGCCTAGTGGTAACCGCCGAGGCTTCGCTTACTCTGTAGATCTCCCGGGAG  
CAGCAGGAAACAAGAAACCTTAGCCTTTTCAAAGTAATAGCCATTCTCCTCACTGACCTGACAAAGACG  
GATGTCAAGTGGGCCCTGCAGGAGTTTGACAGTTTGTCCAAACAACGTGTTTTTAGTTGAGGCTATAAATT  
CTTAGGAAAGGGTTTGTGCTGAGTGGCACATTAAATCAGTTGGCCAGTATGCATTACTCTGACCATCTTCT  
TAGAAAGCAACGTCTTTGGGGATTTTCAGATGAGTGAATATTCAATGCTCTGTCTTTTAGCATTATCATC  
CACTTCCCCCTGCCCCCTCATAGAATTCCTTTAGAGGATTGGCTCCTGGGCCTCCAGGAGAGCGGGCAGTA  
GGGTAGGGTGGTGGGAGGAGAGGAAAGTCTTAATCCCTTGCCAGGGATTTACTTTGTTCTTCTCAGTCGG  
AGCCTCCCGTACAATGCTGTTTTGAGCTTCACTTAGAAATTGGCTTTATTAGCTAGGAAAGGGGAATTCT  
TTTCACAACAATCGGAAAATGTAATCCCTTAGTCAGGCGGCTGGAGTCTTTAATTCACCTCTCCGGACC  
TTGGGCTGCTGGCTGCTCCTCTCTGCCGCTGGCTGTCTCTCCCTTACCTCCCAGAGTTAGGGTAATAGC  
TGACATTTTTCTTCACTAGGCTTTCTAAGGGATTTCAATCCATTTGTGAGACACTTTAATTCCTGAAGC  
TGCAAAGTTTGCTTTTTTATTACTATAGCTCTACTTATTCTGCATAAATTTATTTATTTATTTGTTTATGTA  
TTTATTTTTTTGAGACAGAGTCTCGCTGTGTTGCCAGGCTGGAGTGCAGTGGCGCCACTCAGCTCACTG  
CAACCTCTGCCTCCTGGGTTCAAGCAATTCCTTCTCCTCAGTCTCCTGAGCAGCTGGGACTCAGGCACG  
TGCTACCACGCCCAGCTAAGTTTTGTATTTTTTAGTAGACGAGGTTTCATCATATTGGCCAGGCTGGTCT  
TCGAACTCCTGACCTTGTGATCCACCTGCCTCAGCCTCCCAAAGTGCTGGGATTACAGGCGTGAGCCACC  
ACGCCTGGCTTATTCTGCATAAATTTTTAAGAGTTGTGAATTTGTTTTAAGATCAAATTTAAAAGTACATTT  
TCTTTCTTATCTTGTCAATTAAGTATGTTGGGTATGTGTGTGTGCTTGTGATTTCCCTGGCTGGACCAGT  
GTATAACTTCAAAGAGGGCTGGTGCCTTGCCTTTAGTCTGCTGGATAGCACTCCTCCAGACCCTCCCTTT  
GCTGAGCAGCTCCGTGGACCTGTGCAAATCTCTACCCAGCTTTGTTGGACAACAAAATACCCCTGGAGAAT  
ATCAAGCCCTTTAACAATACCAGTTTGTGCTCCCAGACGTAAGATCTCTTTGGCCATGTATGTGGGATTCT  
CCATGAAGGAGAAGCTTCATTTCCAGCAAGAATCTGGCTTCCACCTAGACTTGGGAAACAGATACTGAAA  
AGCATATTGCTGATCAACTAGACAACCTACTTCCACTCTTGATTGCCCTGTAATCCATCTAGAACAGCC  
AGAGCAATTTATTTATTTAAAAAATTTAAAAATTG

RNA

>LINC02837

AUUCUGGGAGGUGUCUGGGAAGCACAUUCGAGUGUGCACCGCAGCAGGGCUUGAUCCACCACAUCACAU  
UCCGCGCUCGUCUGCCUGAACUCAUCAAAGUGGACCCAGUGAAAGCUGUGUAGAGGAGGACUAUUCUG  
GUCUGAGGCUUGGUACAUUCAUGAGGCCAGGAACACGGGAUUGAAUCCAAGCAGAGCACCAGGAUACC  
UGUAGCAGAAAUCCAGGCAAGAGCCAAGAAGAUGGGAACGGAAUAGCAAGCGCUGAAUUAUUAUUAUUAU  
UAAUUAUUAUUAUUAUUAUUAUUAUUAUUAUUAUUAUUAUUAUUAUUAUUAUUAUUAUUAUUAUUAU  
CUGCAACCUCCCCCUCCGGGGUUAAGCGAUUCUCCUGCCUCAGCCUCCCAAGUAGCUAGGAUUAACAGGU  
GCCCCGCCACCAUGCUCGGCUAAUUAUUAUUAUUAUUAUUAUUAUUAUUAUUAUUAUUAUUAUUAUUAU  
GGUCUGGAACUCCUGACCUCAGUGAUUGGCCGGCCUUGGGCAAGUGCUGAAUUAUUAACACGGCUCUCCU  
GAGGACUUCUAUUGGGUUCUGCCUAGUGGUAACCGCCGAGGCUUCGCUUACUCUGUAGAUUCUCCGGGAG  
CAGCAGGAAACAAGAAACCUUAGCCUUUCAAAGUAAUAGCCAUUCUCCUCACUGACCUGACAAAGACG  
GAUGUCAAGUGGGCCUCGAGGAGUUUGACAGUUUGUCCAAACAACUGUUUUUAGUUGAGGCUAUAUUAU  
CUUAGGAAAGGGUUUGUCAGUGUGGCACAUUAAUACAGUUUGGCCAGUAUGCAUUAUCUCUGACCAUCUUCU  
UAGAAAGCAACGUCUUUGGGGAUUUUCAGAUAGUGAAUUAUUAUUAUUAUUAUUAUUAUUAUUAUUAU  
CACUUCUCCUGCCCCUCAUAGAAUUCUUAUUAUUAUUAUUAUUAUUAUUAUUAUUAUUAUUAUUAUUAU  
GGGUAGGGUGGUGGGAGGAGAGGAAAGUCUUAUUAUUAUUAUUAUUAUUAUUAUUAUUAUUAUUAUUAU  
AGCCUCCCGUACAAUGCUGUUUUGAGCUUACUUAAGAAUUGGCUUAUUAUUAUUAUUAUUAUUAUUAUUA  
UUUCACAACAAUCGGAAAAUGUAAUCCCUUAGUCAGGCGGCUUGGAGUCCUUAUUAUUAUUAUUAUUAU  
UUGGGCUGCUGGCUGCUCUCCUCUGCCGCCUGGCUGUCUCUCCCUUACCUCCAGAGUUAAGGUAAUAGC  
UGACAUUUUUCUACUAGGCUUUCCUAAGGGAUUUUAUUAUUAUUAUUAUUAUUAUUAUUAUUAUUAUUA  
UGCAAAGUUUGCUUUUUUAUUAUUAUUAUUAUUAUUAUUAUUAUUAUUAUUAUUAUUAUUAUUAUUAU  
UUUAUUUUUUUAGACAGAGUCUCGUGUGUUGCCAGGCUUGGAGUGCAGUGGCGCCAUUCAGCUCACUG  
CAACCUUCGCCUCUGGGUUAAGCAAUUCUCCUCCUAGUCUCCUGAGCAGCUGGGACUACAGGCACG  
UGCUACCACGCCCAGCUAAGUUUUUAUUAUUAUUAUUAUUAUUAUUAUUAUUAUUAUUAUUAUUAUUAU  
UCGAACUCCUGACCUCUGUAUCCACCGCCUCAGCCUCCCAAAGUGCUGGGAUUAACAGGCGUGAGCCACC  
ACGCCUGGCUAUUAUUCUGCAUAAUUAUUAUUAAGAGUUUGUAAUUGUUUAAGAUCAAUUAUUAUUAUUA  
UCUUUCUUAUCUUGUCAUUAACUGAUGUUUGGUUAUGUGUGUGCUUGUGAUUUCCUGGCUGGACCAGU  
GUUAUACUUAAGAGGGCUGGUGCCUUGCCUUUAGUCUGCUGGAUAGCACUCCUCCAGACCUCUCCUUU



GCUGAGCAGCUC CGUGGACCU GUGCAAAUCUCUACCCAGCUUUGUUGGACAACAAAUA CCCUGGAGAAU  
AUCAAGCCCUUUAACAUA CCCAGUUUGUGCUCCCAGACGUAAGAUCUCUUGGCCAUGUAUGUGGGAUUC  
CCAUGAAGGAGAAGCUUCAUUUCCAGCAAGAAUCUGGCUUCCACCUAGACUUGGGAAACAGAUACUGAAA  
AGCAUAUUGCUGAUCAACUAGACAACCUACUCCACUCUUGAUUGCCCCUGUAAUCCAUCUAGAACAGCC  
AGAGCAAUUUAUUUAUUAAAAAAUUUAAAAUUG

>XR\_002958226.1 PREDICTED: Homo sapiens long intergenic non-protein coding RNA 2856 (LINC02856), ncRNA  
AGTCTCTCAAATAACAGATAAAAGAAATTAGGCAAGGTACTGCTGTCTCCATCTCTGTAAAATAAAACCTA  
GGCACTTTCTACTGATAATAGACTAGCACCAACATGCAGTCAGTAACACGGGACACTAAAAACAAGCCATT  
TGGATCACACAAAGAAGAATATTGACTCGTGCCACTTTAAAAACATGTGATATTATTTGGCATTACAAATT  
CTTTCCCTATTTGTTGTCTGTATTGAATTTTTCTTTGACTTAGTGCACTTGCTCATGTATCTTGCCCTC  
TTTTAAACCTTGGTTGGTGACGGTTCTTTGCACAATTGCGGAGGTCTTTTGCTACTCCAATTGCATAAAT  
AACTGAAGTAAGGCTGCAAAAAGTCAACCGAGCTTGGGCATCAAGGACAATGAAGTTGCTGAGTATCTCTT  
GTGCCTCACTGACTCCTTTCCAGTCAGGAGACGACCAGTTTGAAGCAGAAGAATGTCTGATAATGGCAT  
AGAGCCAAAGCGATTCCATCCTCTGGACATGAGCTGTGTGGTGTCCCCGTCTCATACCTATTCCAGAAC  
CACACTGGTCCCTGCTCTCGTCTCCGAACTGTCGGAGGATGGACCTGCTTTTGCAAGGACCTGAACCTCC  
TGTGTTGTTGCTTAAGATTTTTACCCAGGCATGAAAAGGAAATGAATTCTGCCAACTCATCGCTGTGTCT  
GTGGGAACAGAACTCAGGGCACCTATTCTCTGCAAGAAAAGCATCAATTCCCTGTAAGAAAAGTTTCCC  
ACCTGAGACAATGACACAGACCAACATAAATGCTCTTTTGGTTTTATGATTTCTGATATTAGATTTTACT  
TGATTTTTTTATTTTAAATTTTAAATTTTCAATTTGAGAGTTAAAAGGGTTACTTCTTTTATTTCCAGC  
AGTTCAAGGAATTTTCAAGCAATCTTGGTCCAGAGTTGGTAATAAAGACATTTAAATGAGATGGGAATAC  
TGTCTGTTATGCTGACCAGTACTAAGTCTCCCGCAGTTCATTTTCTGAGAATAAATGCCTGTCTGATA  
CATCAAGA

RNA

>LINC02856

AGUCUCUCAAUAACAGAUAAAGAAAUAAGGCAAGGUACUGCUGUCUCCAUCUCUGUAAAAUAAAACCUA  
GGCACUUUCACUGAUAAUAGACUAGCACCAACAUGCAGUCAGUAACACGGGACACUAAAAACAAGCCAUU  
UGGAUCACACAAAGAAGAAUAUUGACUCGUGCCACUUUAAAACAUGUGAUUUUAUUUGGCAUUCACAAUU  
CUUUCCCUAUUUUGUUGUCUGUAUUUGAAUUUUUCCUUUGACUUAGUGCACUUGCUCUAGUAUCUUGCCUC  
UUUUAAAACCUUGGUUGGUGACGGUUCUUUGCACAAUUGCGGAGGUCUUUUGCUACUCCAAUUGCAUAAAU  
AACUGAAGUAAGGCUGCAAAAAGUCAACCGAGCUUGGGCAUCAAGGACAAUGAAGUUGCUGAGUAUCUCUU  
GUGCCUCACUGACUCCUUCCAGUCAGGAGACGACCAGUUUGAAGCAGAAGAAUGUCCUGAUAAUGGCAU  
AGAGCCAAAGCGAUUCCAUCUCUGGACAUGAGCUGUGUGGUGUCCCCGUCCUCAUACCUAUUCCAGAAC  
CACACUGGUCCCUGCUCUCGUCUCCGAACUGUCGGAGGAUGGACCUGCUUUUGCAAGGACCUGAACUCCC  
UGUGUUGUUGCUUAAGAUUUUUACCCAGGCAUGAAAAGGAAAUGAAUUCUGCCAACUCAUCGCUGUGUCU  
GUGGGAACAGAAACUCAGGGCACCUAUUCUCUGCAAGAAAAGCAUCAAUUCCUGUAAGAAAAGUUUCCC  
ACCUGAGACAAUGACACAGACCAACAUAUAUGCUCUUUUGUUUUUAUGAUUUCUGAUUUAGAUUUUACU  
UGAUUUUUUAUUUUUAAUUUUUUAAAUUUCAUUUUGAGAGUUAAAAGGGUUACUUCUUUUUUUUUCCAGC  
AGUUCAAGGAAUUUCAGAGCAAUCUUGGUCCAGAGUUUGGUAUAAAAGACAUUUAAAUGAGAUUGGGAUAC  
UGUCUGUUAUGCUGACCAGUACUAAGUCUCCCGCAGUUCAUUUUUCCUGAGAAUAAAUGCCUGUCUGAU  
CAUCAAGA

>NR\_034133.1 Homo sapiens long intergenic non-protein coding RNA 2864 (LINC02864), long non-coding RNA  
TTCTCCTGCCTCAGCCTCCCGAGTAGCTGGAACTACAGGCGCCCGCCATGATGCCCCGGCTCATTTTCTGT  
GTTTTCAGTAGAGACGGGGTTTCACTGTGTTAGCCAGGAAAGTCTTGATCTCCTGACCTCGTGATCCTGA  
CCTCGGCCTCCCAAAGTGCTGGGATTACAGGCGCGAGCCACCGCGCCCGACAGCAGTTATGAAGTTCTAA  
AAGCAAGTCTTAATCAGGAAGTGTCCTTGATCACCAACGGCTCGCCAGGCATGCTGGCTCTCTTCCACT  
TCCACCTTCCACCATGGGATGACGCAGTAAGAAGGCCATCAGTAGATGCCAGTCCCTCAACCTTGAACCTT  
TCCAGACGCAGAACTTTATGCCTCCATTTTCTCTGCTGCATGGCCCCAGGAGAGATTTTAATTAGCTTT  
CTAACCTTGGTCCAGATTGCACATGCAAAATGGTAGAGGATGCAACACCCCCGCTTGTGGAGCTGCCGCTT  
GTGTCTGGCATGAAAAATTCACAAGAAGAGAGGAAATACTGAGGAGAAAAATGGCAGATTGTGTTTGCTGAA  
TTTGATTGACGAAGAAGTCACCATGAAAAATCACAGTGAACCATTTGGAAAGCAAAC TGCCAAAAAATAAT  
AGTTAGTCATGCTCTCAGGCTGGTTGTTTTGGCTGTTGTGGGTTTTCTTGCAATTTCCAGATGATTGCAAAG  
AGCTGTTTTCTCAATTTCTGCAACAAGTGCCAGCTGAAATTTTGGTACCAGTTTTCATTAATATGTAGAAC  
AATTTGAGCCTGAGTGAGTTCTGTGGAGCCATACTACCTGCGATTCAAGCCAGCAACCTTGAATCTCC  
CTGAACAATTTCTATGGTGTCCAATCACATTTGCAATCACTCCCCACACTCAGTAGGTTCTGCCCCCACA  
TCATTTCTTTTCTCTATCCTCTTTCCAGCTTTTATAATATGACTTAGTTCAAGCCCTAATCACTGGATTA  
TTCAAAGTCCCTTAACAGGTTAATTCCTACTGTGATCAACACTTTTAAAGGAAGGCAATAGGGCCAGGCAT  
GGTGGCTCACGGCTGTAATCCCAGCACTTTGGGAGGCTGAGGCGAGTGGATCACAAGGTCGGGAGTTTGA  
GACCAGCCTGACTAACACAGTGAACCCCGACTCTACTAAAAATACAAAAAATTAGCCAGGTGTGGTCGT  
GGGTACCTGTAGTCCCAGCTACTAGGGAGGCTGAGGCAGGAGAAATGGCGTGAACCCGAGAGGCGGAGCTT  
GCAGTGAGCCAAGATTACGCCACTGCACTCCAGCCTGGGTGACGGAGCGAGACTCCATCTCAAAAAAAT  
AAAAAATAAATAAAACAGAAAGGCAATGGCTATCCCAAATTGCTGAAGCCTTTGCTAAAAGCACAGACAG  
AAAACAACAATATGGTGATGTTTGTGTTAAACAAATGTTATTGATTCTAGGACACAGGTGCAGATGGCAAA  
TAGTCAAATCAAATGTTGATCCCAGGGGTGGCTGTATCATCACTAAGGCCAAATCACAACTTTGACTGG  
TCTCATGGGAACACAGATCTTGGGTTTGGAAAGAGCACAGGCCTGGCCATGGGAATGGACACAGGGTAAT  
TTTAAAGATGACTAGAGGTTCTCTCAAACCTTAAAGTACCCTGAACCTTGTTTAAAGCTAAAATGGCTCC  
TAAATGATAGACACGTTTCTCAGTTATCTCTGCAAACCTGAAGATCCTATCAGCCTGTTTCAGGGTCTCACA  
GGCCTCTGGGTTTGTACATGATGTCCCTACAGTGGCGATGGGGACTGATGAGAGCCACCGTTCCCATTGG  
AGGAGGGCAAGCTGCCACTGAGTGTCTGCTGGAGTAAACATCCAATCACATGTGTACCTGTATCCTA  
TGGATATTGGCTTCCCCTCATACAACCTGTTGTTCCCTTTGTTTTCCATTCCTGACTATATTTGAATCTTT  
CTTGGAATTTCCAGGAAACATCTGACTGCTTTCCCTATGCCACTTCATACCCAAGAGAAGCTCAGGGAGATC  
CTTTAAGGTCCTTTATGCCCATTTATGATAGTACATGAATAGGTAAATGTACCCTGCTCCCTGTACTTCT  
TGGATAATGCACAAATAGTAAGACAGTCTCGCAACCAGCAGCCTAGACAGCCCAAATATGTGAAACCAAA  
ACAGCTTGATCTTCCAGACCTGTTCTGACTCCTTGAGTCTTAAATCTCCAAGCCTCTTGAATGTTTCACC  
CACAGCCTTCCCTTTGGGATCTGGCATGGGACAGGAAGGGCAGAGAAGGGCCTGGGGCTTTTCTCAGGG  
ATCCACCACAGTCTAGGCCAGTGGGTGGCAAACTTTTCTGCAAAGGATCAGCTGGGAGATAGTTTCAAC  
TTTGTAGTCTCGTCGAGCTACTCTACTCGACTCTGCCACTGGAGTGTGAATGCAGTCATGAATAAAAGA  
ATGAAAGTTTTCCAGTGAAACTTTAGTCACAAAAACAGTCTGCAGGCTGTGTCTGGCCCGTGGGCTTTGG  
TTTGCTGGCCTGCGGGCTCCTAGAAGGCTCTGACTTTATCCCTCTATGAGGGAAAGCAGGTTTTGGGGTA  
TTCTCCCAAATCTTTATACCTTATGTCTGTGTCTTTTTTAAATTAAAAGTAAAATTTAGGCCAAAAAAA  
AAAAAAAAAAAAA

RNA

>LINC02864

UUCUCCUGCCUCAGCCUCCCGAGUAGCUGGAACUACAGGCGCCCGCCAUGAUGCCCGGCUCAUUUUCUGU  
GUUUUCAGUAGAGACGGGGUUCACUGUGUUGAGCCAGGAAAGUCUUGAUCUCCUGACCUCGUGAUCCUGA  
CCUCGGCCUCCCAAAGUGCUGGGAUUCAGGCGCGAGCCACCGCGCCCGACAGCAGUUAUGAAGUUCUAA  
AAGCAAGUCUUAUCAGGAAGUGUCCUUGAUCACCAACGGCUCGCCCAGGCAUGCUGGCUCUCUCCACU  
UCCACCUUCCACCAUGGGAUGACGCAGUAAGAAGGCCAUAGUAGAUGCCAGUCCCUCAACCUUGAACUU  
UCCAGACGCAGAACUUUAUGCCUCCAUUUUCUCUGCUGCAUGGCCCCAGGAGAGAUUUUAUUAGCUUU  
CUAACCUUGGUCCAGAUUUGCACAUGCAAUUGGUAGAGGAUGCAACACCCCCGCUUGUGGAGCUGCCGCUU  
GUGUCUGGCAUGAAAAUUCACAAGAAGAGAGGAAAUACUGAGGAGAAAAUUGGCAGAUUGUGUUUGCUGAA  
UUUGAUUGACGAAGAAGUCACCAUGAAAAUACAGUGAAACCAUUGGAAAGCAAACUGCCAAAAAAUAAU  
AGUUAGUCAUGCUCUCAGGCUGGUUGUUUGGCGUUGUGGGUUCUUGCAUJUCCAGAUGAUUGCAAAG  
AGCUGUUUCUCAAUUUCUGCAACAAGUGCCAGCUGAAAUUUUGGUACCAGUUUCAUUAUUUAUGUAGAAC  
AAUUUGAGCCUGAGUGAGUUCUGUGGAGCCCAUACUACCUGCGAUUCAAGCCAGCAACCUUGGAAUCUCC  
CUGAACAAUUUCUUAUGGUGUCCAAUCACAUUUGCAAUACUCCCCACACUCAGUAGGUUCUGCCCCCACA  
UCAUUUCUUUUUCUUAUCCUCUUUCCAGCUUUUAUUUAUGACUUAGUUCAAGCCCUAAUCACUGGAUUA  
UUCAAAGUCCUUAAACAGGUUAAUUCUACUGUGAUCAACACUUUAAGGAAGGCAUAGGGCCAGGCAU  
GGUGGCUCACGGCUGUAAUCCAGCACUUUGGGAGGCUGAGGCGAGUGGAUCACAAGGUCGGGAGUUUGA  
GACCAGCCUGACUAAACACAGUGAAACCCCGACUCUACUAAAAAUACAAAAAUUAGCCAGGUGUGGUCGU  
GGGUACCUGUAGUCCAGCUACUAGGGAGGCUGAGGCAGGAGAAUGGCGUGAACCCGAGAGGCGGAGCUU  
GCAGUGAGCCAAGAUUACGCCACUGCACUCCAGCCUGGGUGACGGAGCGAGACUCCAUCUAAAAAAAU  
AAAAAAUAAAUAAAAACAGAAAGGCAAUGGCUAUCCCAAUUGCUGAAGCCUUUGCUAAAAGCACAGACAG

AAAAACAACAAUAUGGUGAUGUUUGUGUUAAAAAAAUGUUUAUUGAUUCUAGGACACAGGUCAGAUGGCAAA  
UAGUCAAAACUCAAUUGUUGAUUCCAGGGGUGGCUGUUAUCAUCACUAAGGCCAAAUACAACUUUGACUGG  
UCUCAUGGGAACACAGAUUCUUGGGUUUGGAAAGAGCACAGGCCUGGCCAUGGGAAUGGACACAGGGUAAU  
UUUAAGAUGACUAGAGGUUCCUCAAACCCUAAAAGUACCACUGAACCUGUUUAAAAGCUAAAAUGGCUC  
UAAAUGAUAGACACGUUUCUCAGUUUUCUGCAAACUGAAGAUCCUAUCAGCCUGUUCAGGGUCUCACA  
GGCCUCUGGGUUUGUACAUGAUGUCCCUACAGUGGCGAUGGGGACUGAUGAGAGCCACCGUCCCCAUUGG  
AGGAGGGCAAGCUGCCACUGAGUGUCAGCUGCUGGAGUAAACAUCCAAUCACAUGUGUACCUGUAUCCUA  
UGGAUAUUGGCUUCUCCCUCAUACAACUUGUUGUUCUUUGUUUUCCAUUCCUGACUAUAUUUGAAUCUUU  
CUUGGAUUUCCAGGAAAACUUCGACUGCUUUCCUAUGCCACUUCAUACCCAAGAGAAGCUCAGGGAGAUC  
CUUUAAGGUCCUUUAUGCCCAUUAUGAUAGUACAUGAAUAGGUAAAUGUACCACUGCUCCCUGUACUUCU  
UGGAUAAUGCACAAAUAGUAAGACAGUCUCGCAACCAGCAGCCUAGACAGCCCAAUAUGUGAAACCAA  
ACAGCUUGAUCUUCAGACCUUGUUCUGACUCCUUGAGUCUUAAAUCUCCAAGCCUCUUGAAUGUUUACCC  
CACAGCCUUCUCCUUUGGGAUCUGGCAUGGGACAGGAAGGGCAGAGAAGGGCCUGGGGCUUUUCCUCAGGG  
AUCCACCACAGUCUAGGCCAGUGGGUGGCAAACUUUUUCUGCAAAGGAUCAGCUGGGAGAUAGUUUCAAC  
UUUGUAGUCUCGUCGAGCUACUCUACUCGACUCUGCCACUGGAGUGUGAAUGCAGUCAUGAAUAAAAGA  
AUGAAAGUUUUCAGUGAAACUUUAGUCACAAAAACAGUCUGCAGGCUGUGUCUGGCCCGUGGGCUUUGG  
UUUGCUGGCCUCGCGGCUCUAGAAAGGCUCUGACUUUAUCCCUUAUGAGGGAAAGCAGGUUUUGGGGUA  
UUCUCCCAAAUCUUUAUACCUUAUGUCUGUGUCUCUUUUUAAAUAUAAAGUAAAAUUUAGGCCAAAAAAA  
AAAAAAAAAAAAAA

>NR\_186852.1 Homo sapiens long intergenic non-protein coding RNA 2879 (LINC02879), transcript variant 1, long non-coding RNA  
GGACTTATTTCAGCAGAACCCCCAAGAAGATGCAGACTAAGAAATGCCAATGCTTTTGATGGGTACAAGGAA  
GAAATAGGACTAAGACAAGACAAATAATGGAGGACTTACATGGCAGAGGTAAATCACCCACATCTCTTTTC  
TCCAACCTCCTTATGCTCGATGCTCAGCATTTGAAGCCCTTTACCCAGGGACAAATACAAGTTTGACAAAG  
CCATCTGAGGAAAAATAAGGCAACAAGGAGAAGTGCAGAGACAAGGTGGGGAAAGCCCCCTTACAAAACCAT  
CAGATCTCGTGAGAACTCATCCACATCACAAGAACAGCATGAAGAAACGGAACAAGGGGAATGCAATCTC  
ACAGGATGGAAAATAACCTGTGGTGAATTGTTGCCATCCAGATCCACTTTTAAAGTCCACATGGTTCATTCA  
TTTTGGACTAGATCCTGGTACAGCCCAGTGAACCTGATATTTCTTGAAATCAGGCACAGAGGCTCTGAAGTA  
ATGCATTACATTTGCATCCATGATTTGCTTAAAAATGTTCCATTTAGCCTTTCTCCAGGAAACAAAGCC  
AGCAGTATTTGATTATTGAATAGCTCGTTTTGGATGCTTAGTTTGAGAAGATTTTATTAAGATTATGGGA  
AACTTGAATTTTACAAAATGAATCATGAGTTATATTTTCAGTTTTGATTTGTCTCCAAGGGTTGAAATACA  
TAGAAGTCTAGGATACATTATATATATTAGCTCTATTTTAGCATGCATTTAATGCAATCACAGGCAAAAATC  
AAATGCTTTTAAAGAAAAAGATTGCAGTTTTAGAAATGAAGGATGTGAAAAAGGACGAATCTATATAAATA  
AAAGTGAACCTTAGAGTAATAACATGCAATATAGTCTATGTAGATATGCATATTTTAATTGTATATTACTA  
TTTGTCCCATCACAATAATTGGTTTAAACAATGGTGTATTTTATATGTGTAAAACAAAGTTTGGTATGTGT  
GTGCACACATATACACACAGAAACACACACACACACTTTTTCTAATCAACTAACATTTAAGAAATACCACT  
GAAGGAAATATTAATGACAGAAAAGAGCTTTTCTGCACACAGAAAAGCACGCACACTCCTATGCAGCATAC  
AAATAGGTAAGAGTACATGTTTTCCCTGAAAGAAGAGCAAGAGACCAACGGAATAAGCCCCCTTTACTGGG  
TTCCCATATGGCTGAATGGTCTCAATATCTCAATCTTTAGAACATACCTCAGCATCTCCACATCTCCTCC  
TACCTCTGTCTGTGTTGCTGGGACACAGGGGCAGGAAATGGATGCATCCCTTCCCATGCACGCCCCAAAC  
AGCTCCTCAACTCAATCTCAGCCCCATGCCTCTTCTATTCTTCTGTGAGGAAGTGGCTTCTCATGACCTA  
TCCGAGAGCTCAGCACATGTTAAGTTCTCACACAGGCTTAAGCCAACATAATCGTCAACATTAAAAAGTA  
ACAACATAATATTTTGGGCGGATGATGTTTTCTGTTCTATAATCAACAGTGACTTCTCAGAGTGGCCTTTTCT  
TGACCTCTCTATCTAAATAGTACTTTTACGTTTTTCTCTATCCCTCCCTAAATTACTCTGGTTTCATTTTTT  
GTCAAAGAATTTTTTACTGCTGAATAGTGTCTATAGACCTATTTCATTTATTTATTTTCTCCTCTCCAGT  
AAAAATATAAGATGCGTGAGAGAAGGTTTGTTTTTGTTCCCTCTGCCATATGGGAAAGAACAGTGGTGA  
ATTTAGTAGATGCTCAATAAATATTTGTTGATTTAATAAAAAAA

RNA

>LINC02879

GGACUUUUAUUCAGCAGAACCCCCAAGAAGAUUCAGACUAAGAAAUGCCAAUGCUUUGAUGGGUACAAGGAA  
GAAAUAGGACUAAGACAAGACAAAUAUUGGAGGACUUACAUGGCAGAGGUAAAUCACCCACAUCUCUUUC  
UCCAACUCCUUAUGCUCGAUGCUCAGCAUUGAAGCCUUUACCCAGGGACAAAUACAAGUUUGACAAAG  
CCAUCUGAGGAAAAUAAGGCAACAAGGAGAAGUGCAGAGACAAGGUGGGGAAAGCCCCUACAAAACCAU  
CAGAUUCUGGAGAAACUCAUCCACAUCACAAGAACAGCAUGAAGAAACGGAACAAGGGGAUUGCAUUCUC  
ACAGGAUGGAAAAUAACCUUGUGGUGAAUUGUUGCCAUCAGAUCCACUUUUAAGUCCACAUGGUUCAUUC  
UUUUGGACUAGAUCUGGUACAGCCCAGUGAACUGAUUAUUCUUGAAAUACAGGCACAGAGGCUCUGAAGUA  
AUGCAUUAUUAUUGCAUCCAUGAUUGCUUAAAAUGUCCAUUUAGCCUUUCCUCCAGGAAACAAAGCC  
AGCAGUAUUAUUGAUUAUUGAAUAGCUCGUUUUGGAUUCUAGUUUGAGAAGAUUUUAUUAAGAUUAUGGGA  
AACUUGAAUUAUUACAAAUAAGAAUUAUGAGUUUAUUAUUUAGUUUUUGAUUUUGUCUCCAGGGUUGAAAUACA  
UAGAAGUCUAGGAUACAUAUAUAUUAUAGCUCUAUUUUAGCAUGCAUUUAAUGCAAUCACAGGCAAAAAUC  
AAAUGCUUUUAAAAAGAAAAAGAUUGCAGUUUUAGAAAUGAAGGAUGUGAAAAAGGACGAUUCUAUAUAAAAUA  
AAAGUGAACUUAAGAUAAUAAUAGUCAAUAUAGUCUAUGUAGAUUAUGCAUUAUUUAUUAUUAUUAUUA  
UUUGUCCCAUCACAAUAAUUGGUUUAAAACAAUGGUGUAUUUAUUAUGUGUAAAACAAAGUUUGGUUAUGUGU  
GUGCACACAUUAACACACAGAAACACACACACACACUUUUCUAAUUAACUAACAUUUAAGAAAUACCACU  
GAAGGAAAUUAUAAUAGACAGAAAGAGCUUUUCUGCACACAGAAAAGCACGCACACUCCUAUGCAGCAUAC  
AAAUAGGUAAGAGUACAUGUUUUCUGAAAGAAGAGCAAGAGACCAACGGAUAAGCCCCUUUACUGGG  
UUCCCAUAUGGCUGAAUGGUCUCAAUAUCUCAAUCUUUAGAACAUAUCCUAGCAUCUCCACAUCUCCUCC  
UACCUCUGUCCUGUGUUGCUGGGACACAGGGGCAGGAAUUGGAUGCAUCCCUUCCCAUGCACGCCCCAAAC  
AGCUCCUCAACUCUAAUCUCAGCCCCAUGCCUCUUCUAUUCUUCUGUGAGGAAGUGGCUUCUCAUGACCUA  
UCCGAGAGCUCAGCACAUUGUUAAGUUCUACACAGGCUUAAGCCAACAUAAUCGUCAACAUUAAAAAGUA  
ACAACAUAUAUUAUUGGGCGGAUGAUGUUUUCUGUUCUAUAUUAACAGUGACUUCUAGAGUGGCCUUUUUC  
UGACCUCUCUAUCUAAAUAGUACUUUACGUUUUCUCUAUCCCUUCCCUAAAUUACUCUGGUUCAUUUUUU  
GUCAAAGAAUUUUUACUGCUGAAUAGUGUCAUAGACCUAUUCAUUUAUUUAUUUUCACUCUCCUCCAGU  
AAAAUAUAAGAUUGCUGGAGAAGAAGUUUGUUUUUGUCCCCUCUGCCAUAUGGGAAAGAACAGUGGUGGA  
AUUUAGUAGAUGCUCUAAUAAUAUUAUUGUUGAUUUAAUAAAAAA

>NR\_186640.1 Homo sapiens long intergenic non-protein coding RNA 2958 (LINC02958), long non-coding RNA  
ACATTTTCTGTAGCTTTGCCCGAAGAGAGAAGCTGTTTTCTCTCAGAGATGGAACATGTTAGCTGGTTGC  
CATGATGTCTTCATTTGTCCATCGCTGCCCCCTCTGTGAGCAGGCAGCCATCAGGACAGAGAGTGGCATGC  
TGGACAGGCCGACTCTGACAAGGAGCAAGATCTCCACGCCACTGCACACCAGCCTGAGAGACAGAGCACG  
ACTCCATCTCAAAGAAAAAAGAAAAAGAAAAAGAAAAATGCAGATCTCTGGGCCCCACCCATACCTGGGGA  
CTCAGAATCACCAGGGCAAGGTCTCATCCTTATGCGTCACATGTGTTTTGAGATCTCATTATCTCCTGGG  
AGGCTGGAGTGCAGTGGTGTGATCATAGCTCACTGCAGTCTTGAACCTCATGGACTCAAGAGATCCTTCCA  
CCTCAGCTTCCCCGAGCAGCTGGGACTACAGCTACGCAGACATTGTGCTGGAATTTCTATGCTGAAGAATT  
AAGCTATATTGTTTTGGCAAAAAGAAAACTGAAAAAAGAAAAATCCATCCCTTTCTACCCTGCTATTATA  
TCATCCACGTTTAAAAAAGTTTGTATGTAGTTATATAACAAGAAGTTTCTGCTTCGGATTTCT  
CTGTTGGGCAGGGTGGTGGGAGGGATGGGGTCTCGAGTTTTTCCCAAGTGAAATCCTGGTAATCCTGCCT  
GAGAGAATTCTTATGAAAGTTTCACTCACAATGAAAGCAAACCTCCAAGGTGGAGGAGGGTGAAGCCGGC  
TGGCTGGACCGATCACTGAGGCCAGTGCTGCGAAGAGAGTTTCAACATTATTTCCAACCTTTCTGGGA  
GCACGGCCAGGCTTGGCACCAGTTTGGTGTCTCGAGTGTGATGCATTCTGAAAACCTGGCTGCGTCCG  
TGGCCCAGCTCCAGTTCTGCAGGGCTCAGCATCAGGCTGCCCCCTCTCCTAAGGTGTTTTGCAGGATCGC  
CCCTCAGAGCTAAACACCCACCAGCTGACCACCTGTTCCAGGTGATGGGATTTTGGCTCAGATCAGCCTG  
GATCAGGGTGGACCTCTACAAGCTGGCTTGATGAATGTAAATGTCTGCTGCCATCTTGAAGACCATCG  
GCAAGCTTTGGTGGGTTTATATTCAGTGGCATTAGGGATTAAGGCAAACCTTAAATGATTCTGAGTGTAA  
ACAGATACAGATATAAACTTTTGGGGGAACAATTTGGTAATAGCTAATAACAATCGTTAAATGTTTTATA  
TCCTTTGACCTGATAGTGTAGTTCTAAGAATTTACCTTAAGAAAATAAATAAATTTATATCCCATGA

RNA

>LINC02958

ACAUUUUCUGUAGCUUUUGCCCGAAGAGAGAAGCUGUUUUCUCUCAGAGAUGGAACAUGUUAGCUGGUUGC  
CAUGAUGUCUUAUUUGUCCAUUCGUGCCCCUCUGUGAGCAGGCAGCCAUUCAGGACAGAGAGUGGCAUGC  
UGGACAGGCCGACUCUGACAAGGAGCAAGAUCUCCACGCCACUGCACACCAGCCUGAGAGACAGAGCACG  
ACUCCAUCUCAAAAGAAAAAAGAAAAAGAAAAAGAAAAUAGCAGAUUCUGGGCCCCACCCAUACCUGGGGA  
CUCAGAAUCACCAGGGCAAGGUCUUAUUGCGUCACAUGUGUUUUGAGAUUCAUUAUUCUCUGGG  
AGGCUUGGAGUGCAGUGGUGUGAUCAUAGCUCACUGCAGUCUUGAACUCAUGGACUCAAGAGAUCCUCCA  
CCUCAGCUUCCCGAGCAGCUGGGACUACAGCUACGCAGACAUUGUGCUGGAAUUUCUAUGCUGAAGAAUU  
AAGCUAUUAUUGUUUGGCAAAAGAAAGAAACUGAAAACAAGAAUCCAUCCCUUUCUACCACUGCUAUUAUA  
UCAUCCACGUUUAAAAAAGUUUGUAUGUAUUUAUACAACAAGAAGUUUCUGCUUCGGAUUUCU  
CUGUUGGGCAGGGUGGUGGGAGGGGAUGGGGUCUCGAGUUUUCCCAAGUGAAAUCCUGGUAAUCCUGCCU  
GAGAGAAUUCUUAUGAAAGUUUCACUCACAAUGAAAGCAAACUCCAAGGUGGAGGAGGGUGAAGCCGGC  
UGGCUUGGACCGAUCAUCUGAGGCCAGUGCUGCGAAGAGAGUUCAGCACAUUAUCCAACCCUUUCUGGGA  
GCACGGCCAGGCUUGGCACCGGUUGGUGUUCUGAGUGUGAUGCAUUCUGAAAACCUUGGCUGCGUCCG  
UGGCCAGCUCUCCAGUUCUGCAGGGCUCAGCAUCAGGCUGCCCCCUUCCUAAGGUGUUUUGCAGGAUCGC  
CCUCAGAGCUAAACACCCACCAGCUGACCACCUGUUCCAGGUGAUGGGAUUUUGGCUCAGAUCAAGCUG  
GAUCAGGGUGGACCUCAACAAGCUGGCUUGCAUGAAUGUAAAUGUCUGCUGCCCAUCUUGAAGACCAUCG  
GCAAGCUUUGGUGGGUUAUUAUUCAGUGGCAUUAAGGGAUUAAGGCAAACUUAUAAUAGAUUCUGAGUGUA  
ACAGAUACAGAUUAUAAACUUUUGGGGGAACAAUUUGGUAAUAGCUAAUAACAAUCGUUAAAAUGUUUAUA  
UCCUUUGACCUAGAUAGUGUAGUUCUAAGAAUUUACCUUAAGAAAAUAAUAAUUAUUAUCCCAUGA

>LINC02974

GTTTAGAAATATTGTTTCCATATTACAAGTTTAAGGAAAAGTTTATCTGCCAAAATAATAACATGGATTTCTAGAGC  
ACCCCATACCATAAGGAGGAGCCAGAATATTTTCCAGCTGAATTCAGTCTTACTCATTTTCCTTGAATGATACTGA  
AATCTAAATTATCCTTGAACACAAACAATGACAAAGAAATACAAATGTTTCATGCAGTGTAAATTTTCAACAATCAAAT  
TGGCCAATCTGATTCTAATTCTAAGCTTTGCTGAGGATGCCAAGCAGAAGCCACGTGAGCACACTGCTGAACACCCA  
GGATCTTTCCATGTATGGCAGCCTTCATGTGAGTTCTCTTCTCACCATAACAATGTTGTGGATACAGAAGGGAAGGAA  
TTGGATTTGGATGAGTACTGAGCACCGATCACAGGACAGAGCCTCAAAGTTGCTTTTTTGGAATAAATTTCTTATAGT  
A

RNA

>LINC02974

GUUUAGAAUAUUGUUUCCAUAUUAACAAGUUUAAGGAAAAGUUUAUCUGCCAAAUAUAACAUGGAUUUCUAGAGC  
ACCCCAUACCAUAAGGAGGAGCCAGAAUAUUUCCAGCUGAAUUCAGUCUUACUCAUUUUCCUUGAAUGAUACUGA  
AAUCUAAAUAUCCUUGAACACAAACAAUGACAAAGAAAUAACAAUGUUCUUGCAGUGUAAUUUUAACAAUCAAU  
UGGCCAAUCUGAUUCUAAUUCUAAGCUUUGCUGAGGAUGCCAAGCAGAAGCCACGUGAGCACACUGCUGAACACCCA  
GGAUCUUUCCAUGUAUGGCAGCCUUCUUGUGAGUUCUCUUCUCACCAUACAAUGUUGUGGAUACAGAAGGGAAGGAA  
UUGGAUUUGGAUGAGUACUGAGCACCGAUCACAGGACAGAGCCUCAAGUUGCUUUUUGGAUAAAUUUCUUUAUGU  
A

>LINC02979

TTTAAAAAATCCAAACTATTTATTGAAAAGCTCTACTAAACAAAATTAGTTCAGACAAAGCAATAAGATGACGAATC  
AAGCTCTCTCCAGAGATGAAAGAAAAGCCAGTCTCAAAGATGACTATAACTAACGCTGTTGCTGGAAAGACAAGGGC  
ACCGAGCCAGCCCTGGGAGAGGCTCCACTTCTTCAAAGACAAAACGATTCCAAACGTGGCAGGACACAGTGCTCACC  
CTACAGTGAACCTCTGGGAATATGTTATTTTTTAAATTTCAGTTAATCTTTCCTTTTTTTTTTTTTTGAGACAGAGTCT  
CCTGTCGCCCAGGCTGGAGTGCAGGGGTGCGATCTCAGCTCACTGCAACCTCCACCTCCCGGGTTCAAATGATTCTC  
GGGCCTCAGCCTCACAAGTAGCTGGAATTACAGGCATGCGCCACCATACCCAGCTAATTTTTTGTATTTTTTAGTAGAG  
ATAGGGTTTCATTATGTTGTCCAGGCTGGGAGACAGAGCAAGACCCCAACTCAAACAAAAACAAA

RNA

>LINC02979

UUUAAAAAAUCCAAACUAUUUAUUGAAAAGCUCUACUAAACAAAUAUAGUUCAGACAAAGCAUAAGAUGACGAAUC  
AAGCUCUCUCCAGAGAUGAAAGAAAAGCCAGUCUCAAGAUGACUAUAACUAACGCUGUUGCUGGAAAGACAAGGGC  
ACCGAGCCAGCCUUGGGAGAGGCUCACUUCUUCAAAGACAAAACGAUUCCAAACGUGGCAGGACACAGUGCUCACC  
CUACAGUGAACCUCUGGGAAUAUGUUUUUUUUUUUUUUCAGUUAUUCUUUCUUUUUUUUUUUGAGACAGAGUCU  
CCUGUCGCCCAGGCUGGAGUGCAGGGGUGCGAUCUCAGCUCACUGCAACCUCACCUCUCCCGGGUUCAAAUGAUUCUC  
GGGCCUCAGCCUCACAAGUAGCUGGAAUUCAGGCAUGCGCCACCAUACCCAGCUAAUUUUUGUAUUUUUAGUAGAG  
AUAGGGUUUCAUUAUGUUGUCCAGGCUGGGAGACAGAGCAAGACCCCAACUCAAACAAAAACAAA



RNA

CCACUCACAACAAUCCACUGGACCACAUGAAGGCUGCAUCCUAAUAUUGGACCUCUUGGAGAAGGAUUUU  
AUUUUGAUAACTUUGGUUAAAGAGCCUGAAAUGUUUCAUUAUCAAUUGCUUCAUUGUUGUUGGUUAUAGAUA  
AUCACCAGUACUUUCAUUAUUAUUAUUCUUCUUGAAACUCUGAUUUUCCAAUAGGUACAACUCACUUU  
UUCUGCUUUAAUUUUCACUAGUUCUCCCAACCAUAGUUAUAAAGAAUCAUCUAGUUAUGGAGAAAUCAC  
UAACCCUUUUGGGAAUCCUGUCCCAUAGCUGAAAUCUACAUUCUCCCAAUUGUCUGGCAAGUUUUAAAGUU  
GUUAUUUCUUUGUUUGUUUCAACAGAUUUGUCCUAAUCAUGUGGAAAGGGCUGCUAAAAUACAGAAUGU  
ACUUACUCCAAGUGAGAUUCCAGUUCACAGAUACAGUAGUAAACCUAAUUGCAAUAAGCCACAGUCA  
UACACAUAUAUUAUUCACACACAUAUUAUAUUGUUAUAUAUAAUAUUAAGCAGUUAUUUGCAAAACAAU  
UGGUACAAUJUUCUUUAUAAGAUAUGUUUUAACAGGAUUUUUAUCAGCGUUGCAAGAAAAGAACUGAGCUGCA  
AAAGGGAUUGGAGUUGUAUCUCAUUAUCUUCUCCUAGGGAGGGUAUUGAAUUGGUUAAAAUACAGUCCA  
CUCUUUUAAGAAAGUAUGUUGCAGAGAGACAAAUGCAAAAUGCCAGAUGGUGGAGUUGAAACAGAGACCUC  
AUGGAAAUCCGGACACAGACAUGCGCAGAGGGAGAAGGCUAUGUGAGGAAGAAGGCAGUGGUUGGAGUGA  
UGAUUUCUCCAAGCCUAGGAAGGCCAGUGACUGGCAGCAAAGCACCAGAAACGAGGGGAAGAAACAUGGAA  
CCGAUUCUUUCUUCAGGCGCUCAGGAGGAACCAACCCAGACGAACCUUGAUUCAGGCUCUAGCCUCUGUUG  
CAUUA AAAACA UUUUUAUUGUUGAA

>NR\_148972.1 Homo sapiens long intergenic non-protein coding RNA 3069 (LINC03069), long non-coding RNA  
AATTAGCGTGGGAGGAAGAGACAGTGAAGCAGCCCCCTTAAAAATGGTCTTTTCGGGTGGAAACACTTTATT  
TGGGAAGCAAAGTGCAAGATTTCAGCAATAGAAACCACTCAGTGTCTTGGTGAATGATTTGATCCTGGCC  
ATCAGAACCTTTACTTCAGCCAGCAATAAACTCTTAGAAACAGAAGCTTCGAGGTATGTACTCCTGTTCT  
GCACGAACAAGTTTTCTGGTTGAACATGCTGAACCTCTTAAAAAATTTCAGAACAAGTTTTCTCAGAGTTT  
ACAAAGGGATTTCAATCACATGAAGAGAGGAAAAACACTGAGTCGTAACAGTGACATCAAAATACTTTT  
GAAGTTGACTGAAAAATGTGGTTGCTTTTGTGTTGAGAATGGCAAATTAAAGAATTGGATATTGGGTTCCTA  
TCTCAGAAGAAAAAAAGGAGGAGACCCCTGAAAACTGAACATGAAGAGGAAGAAGTGGAGTTATGCAACT  
CTTCATAAGAAAAATCTCCATCTGTTTGGAGAAGTACTGCGTCCCTCCGGATTATCTTCTACACTATGCCT  
TATTGTTATCTGGCTGGTTCCACCACCGGTGAGAAGAATGAAAATTGCAGATACCTATTCTGTGTGTTTC  
TCTCCAGAATGGTGGATGTTAGAGACCCCTACTAAGGATTTGTGGACTCACTAACGTAGTCTCTAAAAGGT  
TGGACATCCCTACCCAAGGCTCAAATGGTAACAGGTCCATGCCCTTACTTGTGTGTCAGTTCTCTTATTGAAA  
GAGCATCTCCTAACCATCCTACCAATAAGGGTCTTACTCTGTTGCCCTGGCTGGAGTGCAGTGGCCCAAT  
CATAGCTCACTGCAGCCTTGACTTCCAGCCTCAGTTGATCCTCCTACCTTAATCTCCCAGTAGCTGGG  
ACTGCAGGTTTACTTATACTAAGATTTTTCTTCTGCCCTCTGCCAACCCTGAGACAGCAAGACCAATTCCCTC  
CTCTCCCCTGTCTCTCTCCTCGCTACTCCACATGAAGACAACGAGGATGAAGACCTTCATGATGATCCA  
TTTCCACTTAATGAACAACTTCAGGAAATTATTCAAGAAGAGAGGCATGGTGGTATGCTGGAAAGTCTG  
CTGAGCTTGAAAGTAGGTAACCCAGGCTCCTGTTCTGTTCTCATTGATGAGTTCCCTGACTTCAGGTGA  
GTCACAGCTTCTCTGGACTTTCATGTCTTTTGCAAAGTGAGTCTGATCATTTCTAGGATCTTTTCCAGC  
CCTGAGATTGTATGAGCTGCAATAGCTAAGAGATATGGGAAAGTGGGTCAATTGGAAAGTTGTTTTCTTAA  
CTCCACAGGCAACAATGTGCTCATTTCTAGTCATCAAAGGCAAATACGAAGGGATGGGAAGCACTCTCT  
TCATGTCTCATTTGCAAGCAGAATCACTCTTCACCTTGATTGTCCAGTGTCTGTATAGTCTCTCACAGAGC  
CCAGCACATGTGGGCATTCTGTAAATGGCCATTGAGAACTGCCAGGTCTGTGGCTGCTACAGAGCACAAT  
GATGATGATAATGGTGTGATGATCATGATGATGATGGGCTGGTGTATCGAGGCACAGACCCAAGGAAGG  
CTAATGAGAATGTTTCTAGGGAAGCTTCCCTGCATGTCACTCTTCTTCTTCTACTTCCCTCTAGGTTTCATC  
TTCCCTGACTAACAGGGAGCCAGGGCTATAATAACGGGAAGGAAGTCATCATGTGATTCTACCTAGAAAC  
GCAGGCATCAACTTGAAATGTTTTCTTTCTCTTGTAACTCTGGAATATGGCTCCTTGGATTGGAGGTG  
GCAAATACCACGGGTAAACAATGTCAATCTGAGCTCTTTTAGTACTGAATAATGCAATATATACCATAT  
TCTACCTCTTAAAGAAGGAGTGTATCAGCTATGTGCCTGATATGGTTTGGCTCTATGTCCCCACCCAAA  
TCTCATCTTGTAGCACCCATAATTCCCAGGTTTTGTGGGAGGGACCCGTTGGGAGATGATTGAATCATGG  
GGGCTGGTCTTTCTGTGCTGGTCTTCTGATAGTAAATGGGTCTCACAAGATCTGATGGTTTTTGA AAC  
AGGAGTTTTCTCTGCATGAGCTCTCTCTGCCCTGCTGCCATCCACTTAAGATGTGACTTGCTCGTCCATCGC  
CTTCTGCCATGATTGTGAGGCCTCCCCAGCCAGTGGAACCTTAGCTCAGGACAGCAACCAGACCTGAGAT  
TCTTTTCAACTTATACGCTGTTGATGAATGTGGTTTTCTGGATGAAAACTGAGAACAGACTGACCCCTCTG  
GCCACAGCTACTCGCGTCAGGGACGCATAGTTGCAGGTGCATGCTGTCTGGTTTTGGTTTTGCCAAGTCAA  
ATAGTTGTGTTTTCCGCTGTGGTGAGAGTTTCCAACCTTCAGACGGGGCAAGAGAAATCTAAACAGTTTG  
CCCTTTCAGATGTATTGAAATAGTACTGAAATTTACTGATTTTCCCTCATGTTTTTTTTTCCGTGCTTTT  
ATCACTACCTTGAAAAATAAAGGAGAAAAAGCAAGC

RNA

>LINC03069

AAUUAGCGUGGGAGGAAGAGACAGUGAAGCAGCCCCUAAAAAUGGUCUUUCGGGUGGAAACACUUUAUU  
UGGGAAGCAAAGUGCAAGAUUCAGCAAUAGAAACCACUCAGUGUCCUUGGUGAUGAUUUUGAUCCUGGCC  
AUCAGAAACUUUACUUCAGCCAGCAAUAAACUCUUAGAAACAGAAGCUUCGAGGUAUGUACUCCUGUUCU  
GCACGAACAAGUUUUCUGGUUGAACAUUCUGAACCUUUAAAAAAUUCAGAACAGUUUUCUCAGAGUUU  
ACAAAGGGAUUUCAAUCACAUGAAGAGAGGAAAAACACUCUGAGUCGUAACAGUGACAUCAAAAUACUUUU  
GAAGUUGACUGAAAAUGUGGUUGCUUUUGUUUGAGAAUGGCAAUUAAAGAAUUGGAUUAUUGGUUUCUUA  
UCUCAGAAAGAAAAAAAGGAGGAGACCCUGAAAAACUGAACAUGAAGAGGAAGAAGUGGAGUUAUGCAACU  
CUUCAUAAAGAAAAUCUCCAUCUGUUUGGAGAAUACUGCGUCCUUCGGAUUAUCUUUACACUAUGCCU  
UAUUGUUUAUCUGGCUGGUUCCACCACCGGUCAGAAGAAUGAAAAUUGCAGAUACCUAUUCUGUGUGUUUC  
UCUCCAGAAUGGUGGAUGUAGAGACCCUACUAAGGAUUUGUGGACUCACUAACGUAGUCUCUAAAAGGU  
UGGACAUCCCUACCCAAGGCUCAAAUGGUAAACAGGUCCAUGCCUUACUUGUGUCAGUUCUCUUAUUGAAA  
GAGCAUCUCCUAACCAUCCUACCAAUAAGGGUCUUACUCUGUUGCCUGGCUGGAGUGCAGUGGCCCAAU  
CAUAGCUCUUCAGCCUUGACUUCUCCAGCCUCAGUUGAUCCUCCUACCUUAAUCUCCCGAGUAGCUGGG  
ACUGCAGGUUUACUUUAUCUAAGAUUUUUCUUGCCUCUGCCAACCCUGAGACAGCAAGACCAAUUCUC  
CUCUCCCCUGUCCUCCUCCGCUACUCCACAUGAAGACAACGAGGAUGAAGACCUUAUGAUGAUCCA  
UUUCCACUUAAUGAACAAAACUUCAGGAAUUUAUUAAGAAGAGAGGCAUGGUGGUUAUGCUGGAAAGUCUG  
CUGAGCUUGAAAGUAGGUAAACCCAGGCUCCUGUUCUGUUCUAUUGAUGAGUUCUCCUGACUUCAGGUGA  
GUCACAGCUUCUCUGGACUUUCAUGUCCUUUUGCAAAGUGAGUCUGAUCAUUCUAGGAUCUUUCCAGC  
CCUGAGAUUGUAUGAGCUGCAAUAGCUAAGAGAUUAUGGGAAGUGGGUCAUUGGAAAGUUGUUUCCUAA  
CUCCACAGGCAACAAUGUGCCUUAUUCUAGUCAUCAAAGGCAAUACGAAGGGAUGGGAAGCACUCUCU

UCACUGUCCAUTUUGCAAGCAGAAUCACUCUUCACUUGAUUGUCCAGUGUCUGUAUAGUCUCUCACAGAGC  
CCAGCACAUUGUGGGCAUUCUGUAAAUGGCCAUUGAGAACUGCCAGGUCUGUGGCUGCUACAGAGCACAAU  
GAUGAUGAUAAUGGUGUUGAUGAUGAUGAUGAUGGCGUGGUGUAUCGAGGCACAGACCCAAGGAAGG  
CUAAUGAGAAUGUUUCUAGGGAAGCUUCCUGCAUGUCACUCUUCUCCUUCUACUCCUCUAGGUUCAUC  
UUCCCUGACUAAACAGGGAGCCAGGGCUAUAUAACGGGAAGGAAGUCAUCAUGUGAUUCCUAGAAAC  
GCAGGCAUCAACUUGAAAUGUUUUCUCUUCUUCUUGUAACUCUGGAAUAUGGCUCUUGGAUUGGAGGUG  
GCAAAUACCACGGGUAAAACAAUGUCAUUCUGAGCUCUUUUAGUACUGAAUAAUGCAAUAUAUACCAUAU  
UCUACCCUCUAAAAGAAGGAGUGUAUCAGCUAUGUGCCUGAUUAUGGUUUGGCUCUAUGUCCCCACCCAAA  
UCUCAUCUUGUAGCACCCAUAAUUCCCAGGUUUUGUGGGAGGGACCCGGUGGGAGAUUGAAUCAUGG  
GGGUCUGGUCUUUCCUGUGCUGGUCUUCUGAUAGUAAAUGGGUCUCACAAGAUCUGAUGGUUUUUGAAAC  
AGGAGUUUCUCUGCAUGAGCUCUCUCUGCCUGCUGCCAUCCACUUAAGAUGUGACUUGCUCGUCCAUCGC  
CUUCUGCCAUGAUUGUGAGGCCUCCCCAGCCACGUGGAACUUAAGCUCAGGACAGCAACCAGACCUGAGAU  
UCUUUUCAACTUAUACGCUGUUGAUGAAUGUGGUUUCUGGAUGAAAAACUGAGAACAGACUGACCCUCUG  
GCCACAGCUACUCGCGUCAGGGACGCAUAGUUGCAGGUGCAUGCUGUCUGGUUUGGUUUGCCAAGUCAA  
AUAGUUGUGUUUCCCGCUGUGGUGAGAGUUUCCAACUUCAGACGGGGCAAGAGAAAUUCUAAACAGUUUG  
CCCUUUGCAGAUGUAUUGAAAUAGUACUGAAAUUUACUGAUUUUCCCUCAUGUUUUUUUCCGUGCUUUU  
AUCACUACCCUGAAAAUAAACAAGGAGAAAAGGCAAGC

>XR\_001753453.3 PREDICTED: Homo sapiens long intergenic non-protein coding RNA 3092 (LINC03092), transcript variant X1, ncRNA  
CTCCTCTGTGTCGCCTCAGCAACTTGTCATATCATTGTTACAGCACTTACCACACAGTTGTAAGACGCC  
CACAACAGCCTATGAAGAATAACTAGAGGTCTTCATATCAGAGGCAGAAGGTACTGCAAGCTTACTTTCC  
AACGTGGCTGCATCGTTTTCACATTCCCACCAGCAGTATGAGGTTTCCAATTTCTCTGCATCCTCATCAAA  
ACTTGTTATTATCTGTCTTTTTTATTTTAGACGTTCTAGAAGGTGTGGAGTGGTATCTCATTGTGGTATT  
GATTTGCATTTCCCTTAAGGACTAATGCTTTTGAACATTTTTTTCATGTGCTTATTGGCCATTTGTATATCT  
TCTCTGGAGAAATGTTTTATTCAAATCCTTTGTCCATTTTTTAATTGGATTGTCTTTTTATTGTTGCATGG  
TATAAGTTCTCTATATATTCTGGACACAAGTCTCTTATTAGTTATAACCATTTGCAAATATTTTCTCCCAT  
TCTGTGCGTTGTCTTTTAACCTTTCTAATGTGTCCATTGAAACACAAAAGTTTTTAATTTTCAAAAAGTT  
CAATTTATCTACTTTTTTCTTTTGTCACTTATTTGTATCATATCTGAGAAACCATTACCTAATCCAAGGT  
CAGGAAGGATTACTCCTATGTTCTCTTTGAGAGTTTTATTGTTTTTACTCTTATATTTAAGTTGAATAT  
CCATTTTGAGTTAGTTAATTTTGTATATAGTATGACATAGGATCGAGAGGATCTTGTTAATCACTTTTT  
CCTGATATACATCAGCTTCAAATGTGAAGCTATAAATCTCCCTGTAGGTTTCCTGAAAGCCCTCATTATA  
TAAAGCAACTTCTGTGACAAATTTGACTTGATTAAATTAATTAATTAGAGACACAGTCTTGCTCTGTCCCC  
CAGACTGGAGTGCAGTGGTGCCATCTTGGATCACAGCAACCTTCAACTCTCAGGTTCAAGCAATTCTAGT  
GCCTCAGCTTCCCAAGTAGCTAGGATCACAGGTGTGCACCAGCATGCCTGGCTACTTTTTGTATTTTTAG  
TAGAGGCATGTTTTTGCCATGTTAGCCAGACTGGTCTCTAACTCCTGGCCTCAAGTCTTCCCTGCCTTG  
GCCAACCAAAGTGCTGGGATTACTGGTGTGAACCACCGTGCCTAGTCATGATAATTTATTGAGTGGAGTT  
CTGTTCAAGATGATGGAGGGCTAACAGCAGCAAAAGCCAGGCTCACTGGCTCTTGCCGTGTAATCCTAGCA  
CTTTGGGAGGCCTAGTTGGTTAGGTAGATCACCTGAGCTCAGGAGTTTCGAGACCAGCCTAGCCAACATGG  
CGAAACCTGTCTCTACTAAAAATACAAAAATTAGCCGGGCATAGTGGTGGATGCTAATAATCCAGCTA  
CTCTGAGGCTGAGACAGGAGAATTGCTTGAACCTGGGGCGGAGGTTGCAGTGAGCTGAGATTGCGCCA  
CTTCACTTACGCTGAGTGACAGAGTGAAATTCATCTTAAAAAGAAAAAAGAAAAAGAAAAAGAAAAAG  
CAGCAAAAGAGAATTTTTTGGCAAGATTATGAGCCAAATTTTAAAGAGCTTTTATTACATTTCAAATGTGATT  
TTAAATTCTCAAAGTTGGACAGATAGCAGGGAAAGAATGGTCACAGACTTTTCCCTAATATTTTAAAGTTG  
CTTCAAACCAGTTATTAAATCTTATATGTATTTTTTAAAGACTTATTCCACAGGGGTTTGATTAAATTTAC  
ACAGACTTCTTCCAAAACCTGTATCTAAACCACATTGTTGATATCTAAGAACTCTATGAGCTTCTTCAA  
AGCCCTCTTAAAAATACAACAAAATCATGTTAGCAACTCCAGATTCCAAGTTGAAATCCTCCCGCTTTAG  
TATAAGAACCATCAGTTTTGAATGAGTCTGGATACGAAAACCTATTTTCCCATTTTGAGGAGAAAATCCC  
TTTTTAGAGACTCTTCTTGAATGGATATTTGTTATAACATATTTGGGCTTAGGGCTAAAACCTTTGGTT  
TGTAAGCTGAGGTTTTCAATTGCACTTACCATCAACAGCGTATAAGTTGAAAAGAATCTCAGGTCTGGTT  
GCTGTCTGAGCTACTGCAAGAAGAAACCCTGAGAATAAGAGCATTTCAATTATTGTACATCACATTT  
GCTATTTGCTGCCGTTATTCTTCTATTAAAGGAGGATAATCAACTGATATGATATTGTAGATCTCAGTGC  
CTAGTGCATTGTAGGTCTCAATATATGTTGATTCTTCTTTTCTTTACATATTTTTTGAGGTACAGAAAGA  
AGTTCTTAAATGGTTTTTAACTGTAATCATTTTGGAAAAATTAGCTATGAAGATGGAAATTTGTGAACAA  
AGGAGAACTTGCAAATGCCATTTTACTGAGCATGTTACTGAATGGTTATATAAGGAGTAAATATCTCTC  
AGCCTTAGTAAGTAAATATGAACCAATAAGAACACAGGTGAGGACTCTTTTCCCTAACCAGAATAGATGGC  
TAAGGTTTACAGGGCAATAAATTAGACTATTTGTATCCAAAGCAATATTGTTGTCAACCACCAATTGTAAT  
AAGCATTTTATAATTTATGCCTTTAATGTGTTTATTATGAAAAAGCTTCTAAGTATATTGCACAAGTGG  
TAATCTGCTCCAGAACTGGAAATTTGGGAGACTTGGTTTTTGGACTCAGCCTATTCATTATTATTGGTT  
GATAGGTTTATTATTATTATTATTATTTTAAAGGCCTGAGACAGTAGAGACTTCTAATAAAAATA  
TGCTGCAGTGATGAAAAATTA

RNA

>LINC03092

CUCCUCUGUGUCGCCUCAGCAACUUGUCCAUAUCAUUGUACAGCACUUACCACACAGUUGUAAGACGCC  
CACAACAGCCUAUGAAGAAUAACUAGAGGUCUUAUAUCAGAGGCAGAAGGUACUGCAAGCUUACUUCC  
AACGUGGCUUGCAUCGUUUCACAUUCCACCAGCAGUAUGAGGUUUCCAAUUUCUCUGCAUCCUCAUCAA  
ACUUGUUAUUAUCUGUCUUUUUUAUUUUAAGACGUUCUAGAAGGUGUGGAGUGGUUAUCUAUUGUGGUAUU  
GAUUUGCAUUUCCUUAAGGACUAAUGCUUUUGAACAUUUUUUCAUGUGCUUAUUGGCCAUUUGUAUAUCU  
UCUCUGGAGAAAUGUUUAUUCAAAUCUUUGUCCAUUUUUUAUUUGGAUUGUCUUUUUAUUGUUGCAUGG  
UAUAAGUUCUCUAUAUAUUCUGGACACAAGUCUCUUAUUAUAGUUAUACCAUUGCAAUAUJUUCUCCAU  
UCUGUGCGUUGUCUUUUAACCUUUCUAAUGUGUCCAUUGAAACACAAAAGUUUUUAUUUUCACAAAGUU  
CAAUUUAUCUACUUUUUCUUUUGUCACUUAUUUGUAUCAUAUCUGAGAAACCAUUAUCCUAAUCCAAGGU  
CAGGAAGGAUUAUCUCCUAUGUUCUUAUUGAGAGUUUAUUGUUUUUACUCUUAUAUUUAAGUUGAAUAU  
CCAUUUUGAGUUAGUUAUUUUUGUAUAUAGUAUGACAUAGGAUCGAGAGGAUCUUGUUAUACUUUUU  
CCUGAUUAUCAUCAGCUUCAAAUGUGAAGCUAUAUUUCCUGUAGGUUUCUGAAAGCCCUCAUUUAUA  
UAAAGCAACUUUCUGUGACAAAUUUGACUUGAUUUAAUUAAUUUAGAGACACAGUCUUGCUCUGCCCC  
CAGACUGGAGUGCAGUGGUGCCAUCUUGGAUCACAGCAACCUUCAACUCUCAGGUUCAAGCAAUUCUAGU  
GCCUCAGCUUCCCAAGUAGCUAGGAUCACAGGUGUGCACCAGCAUGCCUGGCUACUUUUUGUAUUUUUAG  
UAGAGGCAUGUUUUUGCAUGUUAAGCCAGACUGGUCUCUAACUCCUGGCCUCAAGUCUUCUUUUUGCCUUG  
GCCAACCAAAGUGCUGGGAUUAUGGUGUGAACCACCGUGCCUAGUCAUGAUAAUUUAUUGAGUGGAGUU  
CUGUUAAGAUGAUGGAGGGCUAACAGCAGCAAAAGCCAGGCUCACUGGCUCUUGCCUGUAUCCUAGCA

CUUUGGGAGGCCUAGUUGGUUAGGUAGAUCACCUGAGCUCAGGAGUUCGAGACCAGCCUAGCCAAACAUGG  
CGAAACCCUGUCUCUACUAAAAUAACAAAAUAGCCGGGCAUAGUGGUGGAUGCUAAUAAUCCCAGCUA  
CUCUGGAGGCUGAGACAGGAGAAUUGCUUGAACCCUGGGGGCGGAGGUUCAGUGAGCUGAGAUUGC GCCA  
CUUCACUUCAGCCUGAGUGACAGAGUGAAAUCCAUCUAAAAAGAAAAAAAAAAAAAAAAAGGAAAAGAAAG  
CAGCAAAGAGAAUUUUUUGGCAAGAUUAUGAGCCAAUUUUAAAGAGCUUUUAUUA CAUUUCAAAUGUGAUT  
UUAAAUUCUCAAAGUUGGACAGAUAGCAGGGAAAGAAUGGUCACAGACUUUUCCCUAAUAUUUUAAGUUG  
CUUCAAACCCAGUUAUUAUAUUGUAUUUUUUAAAGACUUAUUCACAGGGGUUUGAUUAAUUUAC  
ACAGACUUCUCCAAAACUGUAUCUAAACCACA UUGUUGAUUUAAGAAACUCUAUGAGCUUCUUCAAA  
AGCCCUUUA AAAAUACAACAAAUCAUGUAGCAACUCCAGAUUCCAAGUUGAAAUCCUCCCGCUUUAAG  
UAUAAGAACCAUCAGUUUUGAAUGAGUCUGGAUACGAAAACCUAUUUUCCCAUUUUUGAGGAGAAAAUCCC  
UUUUUAGAGACU CUUUUCUUGAAUGGAUAUUUGUUAUAACAUAUUUGGGCUUAGGGCUAAAAACUUUGGUU  
UGUAAGCUGAGGUUUUCAUUUGCACUUAACCAUCAACAGCGUAUAAGUUGAAAAGAAUCUCAGGUUCUGGUU  
GCUGUCCUGAGCUACUGCAAAGAAGAAACCACUGAGAAUAAGAGCAUUUCAAUUAUUGUACAUCACAUTU  
GCUAUUUGCUGCCGUUAUUCUUCUAUUAAAGGAGGAUAAUCAACUGAUUAUGAUUUGUAGAUCUCAGUGC  
CUAGUGCAUUGUAGGUCCUCAUAUAUGUUGAUUCUUCUUUUCUUUACAUAUUUUUGAGGUACAGAAAAGA  
AGUUCUAAAAAUGGUUUUUAAACUGUAAUCAUUUUGGAAAAUAGCUAUGAAGAUGGAAAAUUUGUGAACAA  
AGGAGAACUUGCAA AUGCCA UUUUACUGAGCAUGUUAUCUGAAUGGUUAUAUAAGGAGUAAAUAUUCUCUC  
AGCCUUAGUAAGUA AAAUAAGAACCAUAAGAACACAGGUGAGGACUUUUUCCUAAACCAGAAUAGAUGGC  
UAAGGUUUUACAGGGGCAUAUAUAUGAUUUGUAUCCAAGACAAUAUUGUUGUACCACCAAUUGUAU  
AAGCAUUUUUAUAUUUAUUGCCUUUAAUGUGUUUAUAUGAAAAAGCUUCUAAGUAUAUUGCACAAUGUG  
UAAUCUGCUCCAGAACUGGAAAUUUGGGAGACUUGGUUUUUGGACUCAGCCUAUUCACUAUUUAUUUGGUU  
GAUAGGUUUUAUUAUUAUUAUUAUUAUUUUUUAAAGGCCUGAGACAGUAGAGACUUCUAAUAAAAUA  
UGCUGCAGUGAUGAAAAUA

>NR\_187441.1 Homo sapiens long intergenic non-protein coding RNA 3110  
(LINC03110), transcript variant 1, long non-coding RNA  
TACAGTGTACCACACCAAGGAACCCCACACTCTGAATGAACAGCCCAGTGATCAGGAGCTTTGAATCAATTCTTGG  
CACCTAACAGTTTGTGAAGAGTCTGCTAAACTCCCTCTATCAGAAATCCCAGAGGACTGAGAACAGGTCATCCTTGG  
AGCTGTATCTGAATGGAGTCAGGATCTGGAAGCCCAAGTCTCCTTGTCAATGTCTGCTTGGTTCCCAAGGACACCTG  
TAAATGGAAGAGGGGCAT

RNA

>LINC03110  
UACAGUGUACCACACCAAGGAACUCCCACACUCUGAAUGAACAGCCCAGUGAUCAGGAGCUUGAAUCAAUUCUUGG  
CACCUAACAGUUUGUGAAGAGUCUGCUAAACUCCUCUAUCAGAAUCCCAGAGGACUGAGAACAGGUCAUCCUUGG  
AGCUGUAUCUGAAUGGAGUCAGGAUCUGGAAGCCCAAGUCUCCUUGUCA AUGUCUGCUUGGUUCCCAAGGACACCUG  
UAAAUGGAAGAGGGGCAU

>NR\_186639.1 Homo sapiens long intergenic non-protein coding RNA 3111  
(LINC03111), long non-coding RNA  
GCTAGCACTTGTTTGCTGAACTGTGGAAGAACTGCAAGGTCACGCACATTATTCATGATAAAGCAACTGA  
GCTGACAAGTCTGTGCTTAATTCAAGAATAACCAGTAGGAGAGAGAGAGAAAACACAAGGAGTTAACCACCA  
TCGCCGGTGCTCTCTCAAAGGAAGAGGGGTTAACAGATGAATTCGCAAAGACAGCTCTTCTGGCCAAGAA  
TATGGATCATTTGCAGCACAGAGGCAAGTTGATATATGTAGCATCATGACAGTGAAGCAAATTCACAAA  
AACTGCTAATGGACGGAGAAAATTTTCATGGAGAAAAGCTAGCAGACAGAGCTGGAATAAAACAATGGCAGT  
GTTCCCTTGCTCAAAGAAGCAGTCCCGGGCTGTTCTTTGCCAGGGATATCTTCCCAAGATGACCAGAAAT  
GGCTTCATGACCTAAGGGTGGACAGCAGTGTCTATTGTACCCACATCATCATCGTCTCACACGGAAGAG  
ATGAGGCCTGTCATCAATCCATCAGATTACTCTTTTGATAGTGCAAATTGGAATTACAGAAAGGTTTCTT  
TTTGGAGAAGG

RNA

>LINC03111  
GCUAGCACUUGUUUGCUGAACUGUGGAAGAACUGCAAGGUCACGCACAUAUUAUUGAUAAAAGCAACUGA  
GCUGACAAGUCUGUGCUUAAUUAAGAAUAACCAGUAGGAGAGAGAGAAAACACAAGGAGUUAACCACCA  
UCGCCGGUGUCUCUCUCAAAGGAAGAGGGGUUAAACAGAUUGAAUUCGCAAAGACAGCUCUUCUGGCCAAGAA  
UAUGGAUCAUUGCAGCACAGAGGCAAGUUGAUUAUUGUAGCAUCAUGACAGUGAAGCAAUUCACAAA  
AACUGCUAAUGGACGGAGAAAUUAUGGAGAAAAGCUAGCAGACAGAGCUGGAUUAACAUAUGGCAGU  
GUUCCUUGCUCAAAGAAGCAGUCCCGGGCUGUUCUUUGCCCAGGGAUAUCUCCCAAGAUGACCAGAAU  
GGCUUCAUGACCUAAGGGUGGACAGCAGUGUUCUAUUGUACCCACAUCAUCAUCGUCUCACACGGAAGAG  
AUGAGGCCUGUCAUCAAUCCAUCAGAUUACUCUUUGAUAGUGCAAUUGGAUUACAGAAAGGUUUCUU  
UUUGGAGAAGG
