# Supplementary material for: Long Intergenic Non-Coding RNAs of Human Chromosome 18: Focus on Cancers
Source: MDPI journal article supplement (doi:10.3390/biomedicines12030544), 2024-02-28
Supplement: s1 [file s1]

Table S1. Main characteristics of lincRNAs encoded by genes of human chromosome 18

| Genes            | Chromosome loci | Length, nt | Transcripts* | Pathogenic gene variants* | Subcellular localization**                                             |
|------------------|-----------------|------------|--------------|---------------------------|------------------------------------------------------------------------|
| <i>LINC00305</i> | 18q22.1         | 885        | 28           | 9                         | not found                                                              |
| <i>LINC00470</i> | 18p11.32        | 2231       | 70           | 49                        | exosome, chromatin, cytosol, membrane, nucleolus, nucleoplasm, nucleus |
| <i>LINC00526</i> | 18p11.31        | 1322       | 14           | 23                        | exosome                                                                |
| <i>LINC00667</i> | 18p11.31        | 3979       | 71           | 17                        | exosome, chromatin, nucleoplasm, nucleus                               |
| <i>LINC00668</i> | 18p11.31        | 1751       | 35           | 2                         | exosome                                                                |
| <i>LINC00907</i> | 18q12.3         | 1865       | 65           | 4                         | exosome, cytosol, chromatin, membrane, nucleus                         |
| <i>LINC01254</i> | 18p11.22        | 1921       | 4            | 1                         | not found                                                              |
| <i>LINC01255</i> | 18p11.21        | 526        | 75           | 13                        | not found                                                              |
| <i>LINC01387</i> | 18p11.31        | 603        | 21           | 4                         | exosome                                                                |
| <i>LINC01415</i> | 18q21.2         | 6201       | 1            | 0                         | exosome                                                                |
| <i>LINC01416</i> | 18q21.2         | 2325       | 6            | 6                         | nucleoplasm                                                            |
| <i>LINC01443</i> | 18p11.21        | 1871       | 5            | 0                         | exosome                                                                |
| <i>LINC01444</i> | 18p11.21        | 763        | 14           | 0                         | not found                                                              |
| <i>LINC01477</i> | 18q12.3         | 1240       | 72           | 108                       | not found                                                              |
| <i>LINC01478</i> | 18q12.3         | 2069       | 50           | 42                        | exosome                                                                |
| <i>LINC01538</i> | 18q22.1         | 2418       | 8            | 5                         | exosome                                                                |
| <i>LINC01539</i> | 18q21.2         | 2093       | 84           | 68                        | exosome                                                                |
| <i>LINC01541</i> | 18q22.3         | 3123       | 21           | 0                         | not found                                                              |
| <i>LINC01543</i> | 18q11.2         | 770        | 19           | 3                         | exosome                                                                |
| <i>LINC01544</i> | 18q21.33        | 3217       | 12           | 1                         | not found                                                              |
| <i>LINC01601</i> | 18q12.3         | 955        | 0            | 0                         | not found                                                              |
| <i>LINC01630</i> | 18q21.2         | 1799       | 57           | 4                         | not found                                                              |
| <i>LINC01882</i> | 18p11.21        | 574        | 15           | 1                         | not found                                                              |
| <i>LINC01887</i> | 18p11.22        | 2244       | 34           | 10                        | not found                                                              |
| <i>LINC01892</i> | 18p11.31        | 1207       | 9            | 0                         | nucleolus                                                              |
| <i>LINC01894</i> | 18q11.2         | 1497       | 23           | 15                        | exosome                                                                |
| <i>LINC01895</i> | 18p11.31        | 481        | 30           | 4                         | not found                                                              |
| <i>LINC01897</i> | 18q21.31        | 297        | 7            | 2                         | not found                                                              |
| <i>LINC01899</i> | 18q22.3         | 575        | 22           | 64                        | not found                                                              |
| <i>LINC01900</i> | 18q11.2         | 401        | 12           | 8                         | not found                                                              |
| <i>LINC01901</i> | 18q12.3         | 1115       | 5            | 2                         | not found                                                              |
| <i>LINC01902</i> | 18q12.3         | 4621       | 0            | 0                         | not found                                                              |
| <i>LINC01903</i> | 18q22.1         | 2147       | 3            | 0                         | not found                                                              |
| <i>LINC01904</i> | 18p11.32        | 891        | 2            | 0                         | not found                                                              |
| <i>LINC01905</i> | 18q21.2         | 575        | 82           | 67                        | exosome                                                                |
| <i>LINC01906</i> | 18p11.21        | 477        | 3            | 11                        | exosome                                                                |
| <i>LINC01908</i> | 18q11.2         | 921        | 34           | 28                        | not found                                                              |
| <i>LINC01909</i> | 18q22.2         | 815        | 9            | 0                         | nucleus, exosome                                                       |
| <i>LINC01910</i> | 18q22.2         | 2637       | 4            | 0                         | not found                                                              |
| <i>LINC01912</i> | 18q22.1         | 1932       | 28           | 84                        | not found                                                              |
| <i>LINC01915</i> | 18q11.2         | 2321       | 50           | 52                        | exosome                                                                |
| <i>LINC01916</i> | 18q22.1         | 1277       | 3            | 0                         | not found                                                              |
| <i>LINC01917</i> | 18q21.2         | 1037       | 21           | 234                       | not found                                                              |
| <i>LINC01919</i> | 18q21.2         | 568        | 27           | 9                         | not found                                                              |
| <i>LINC01922</i> | 18q22.3         | 1714       | 5            | 1                         | not found                                                              |
| <i>LINC01924</i> | 18q22.1         | 1722       | 17           | 49                        | not found                                                              |
| <i>LINC01925</i> | 18p11.32        | 500        | 8            | 2                         | not found                                                              |

|                  |          |      |    |     |                                                                 |
|------------------|----------|------|----|-----|-----------------------------------------------------------------|
| <i>LINC01926</i> | 18q21.32 | 491  | 9  | 2   | exosome                                                         |
| <i>LINC01928</i> | 18p11.21 | 504  | 0  | 0   | not found                                                       |
| <i>LINC01929</i> | 18q21.2  | 3067 | 6  | 3   | not found                                                       |
| <i>LINC02564</i> | 18p11.32 | 826  | 12 | 6   | not found                                                       |
| <i>LINC02565</i> | 18q21.31 | 478  | 36 | 259 | not found                                                       |
| <i>LINC02582</i> | 18q22.3  | 1181 | 14 | 3   | ribosome-free cytosol                                           |
| <i>LINC02837</i> | 18q21.1  | 2203 | 7  | 2   | not found                                                       |
| <i>LINC02856</i> | 18p11.22 | 1058 | 4  | 0   | not found                                                       |
| <i>LINC02864</i> | 18q22.3  | 2674 | 29 | 6   | chromatin, cytosol, exosome,<br>nucleolus, nucleoplasm, nucleus |
| <i>LINC02879</i> | 18q12.1  | 1794 | 0  | 0   | not found                                                       |
| <i>LINC02958</i> | 18q11.2  | 1328 | 0  | 0   | not found                                                       |
| <i>LINC02974</i> | 18p11.31 | 463  | 0  | 0   | not found                                                       |
| <i>LINC02979</i> | 18p11.21 | 527  | 0  | 0   | not found                                                       |
| <i>LINC03035</i> | 18q21.2  | 1003 | 0  | 0   | not found                                                       |
| <i>LINC03069</i> | 18q21.2  | 2558 | 0  | 0   | not found                                                       |
| <i>LINC03092</i> | 18q21.2  | 2820 | 0  | 0   | not found                                                       |
| <i>LINC03110</i> | 18q21.32 | 249  | 0  | 0   | not found                                                       |
| <i>LINC03111</i> | 18q21.32 | 571  | 0  | 0   | not found                                                       |

\*according to the LncBook v. 2.0 database [S1].

\*\*according to the RNALocate database [S2].

## References

[S1] Li Z, Liu L, Feng C, Qin Y, Xiao J, Zhang Z, Ma L. LncBook 2.0: integrating human long non-coding RNAs with multi-omics annotations. *Nucleic Acids Res.* 2023;51(D1):D186-D191.

[S2] Zhang T, Tan P, Wang L, Jin N, Li Y, Zhang L, Yang H, Hu Z, Zhang L, Hu C, Li C, Qian K, Zhang C, Huang Y, Li K, Lin H, Wang D. RNALocate: a resource for RNA subcellular localizations. *Nucleic Acids Res.* 2017;45(D1):D135-D138.
