# Supplementary material for: Long Intergenic Non-Coding RNAs of Human Chromosome 18: Focus on Cancers
Source: MDPI journal article supplement (doi:10.3390/biomedicines12030544), 2024-02-28
Supplement: s1 [file s1]

Table S12. Diagnostic value\* of predicted microRNAs interacting with lincRNAs

| lincRNA / microRNA interaction | Sample | Cancer type                | Changes | n, healthy/cancer patients |
|--------------------------------|--------|----------------------------|---------|----------------------------|
| LINC00470 / hsa-miR-17-5p      | Serum  | Non-small-cell lung cancer | up      | 58/94                      |
| LINC00470 / hsa-miR-320d       | Plasma | Colorectal neoplasms       | down    | 30/80                      |
| LINC00667 / hsa-let-7b-5p      | Plasma | Breast neoplasms           | up      | 185/185                    |
| LINC00667 / hsa-let-7b-5p      | Plasma | Prostatic neoplasms        | down    | 40/152                     |
| LINC00667 / hsa-miR-122-5p     | Plasma | Breast neoplasms           | up      | 185/185                    |
| LINC00667 / hsa-miR-196a-5p    | Plasma | Mouth Neoplasms            | up      | 53/90                      |
| LINC00667 / hsa-miR-19a-3p     | Blood  | Colorectal neoplasms       | up      | 53/42                      |
| LINC00667 / hsa-miR-19b-3p     | Serum  | Non-small-cell lung cancer | up      | 58/94                      |
| LINC00667 / hsa-miR-26a-5p     | Plasma | Hepatocellular carcinoma   | down    | 66/196                     |
| LINC00667 / hsa-miR-335-5p     | Blood  | Colorectal neoplasms       | up      | 53/42                      |
| LINC00667 / hsa-miR-34a-5p     | Serum  | Colorectal neoplasms       | up      | 28/35                      |
| LINC00668 / hsa-miR-107        | Plasma | Pancreatic neoplasms       | down    | 80/100                     |
| LINC00668 / hsa-miR-21-5p      | Serum  | Breast neoplasms           | up      | 55/89                      |
| LINC00668 / hsa-let-7e-5p      | Serum  | Thyroid cancer             | up      | 96/106                     |
| LINC01544 / hsa-miR-335-5p     | Blood  | Colorectal neoplasms       | up      | 53/42                      |
| LINC01926 / hsa-miR-29a-3p     | Plasma | Colorectal neoplasms       | up      | 59/37                      |
| LINC01926 / hsa-miR-29b-3p     | Serum  | Thyroid cancer             | down    | 41/79                      |

\*according to the Plasmir database [S1] (<https://dianalab.e-ce.uth.gr/plasmir/#/>).

## References

[S1] Tastsoglou S, Miliotis M, Kavakiotis I, Alexiou A, Gkotsi EC, Lambropoulou A, Lygnos V, Kotsira V, Maroulis V, Zisis D, Skoufos G, Hatzigeorgiou AG. Plasmir: A Manual Collection of Circulating microRNAs of Prognostic and Diagnostic Value. *Cancers* (Basel). 2021;13(15):3680.
