# Supplementary material for: Long Intergenic Non-Coding RNAs of Human Chromosome 18: Focus on Cancers
Source: MDPI journal article supplement (doi:10.3390/biomedicines12030544), 2024-02-28
Supplement: s1 [file s1]

Table S3. Frequency of copy number variations (amplifications and deletions\*) of linc-genes of human chromosome 18 in cancers.

| Gene/Cancer      | BLCA | mBRCA | ESCA | HNSC | LUAD | LUSC | OV  | PAAD | PRAD | SARC | STAD |
|------------------|------|-------|------|------|------|------|-----|------|------|------|------|
| <i>LINC00305</i> |      | 5.1   | 3.9  |      | 3.3  |      |     | 3.7  |      |      | 3.4  |
| <i>LINC00470</i> | 4.1  | 20    | 5.5  | 3.1  |      |      |     | 4.6  | 3.3  |      | 4.1  |
| <i>LINC00526</i> | 3.2  | 4.8   | 3.3  |      |      |      |     |      | 3.3  |      | 4.8  |
| <i>LINC00667</i> | 3.2  | 4.8   | 3.3  |      |      |      |     | 5.5  | 3.3  |      |      |
| <i>LINC00668</i> | 3.2  | 4.8   | 3.3  |      |      |      |     | 5.5  |      |      |      |
| <i>LINC00907</i> |      | 16.4  | 3.9  |      |      |      |     | 23   | 9.8  |      | 4.6  |
| <i>LINC01254</i> |      |       |      |      |      |      |     |      |      |      | 7.5  |
| <i>LINC01255</i> |      |       |      |      |      |      |     |      |      |      | 5.4  |
| <i>LINC01387</i> |      |       |      |      |      |      |     | 5.5  | 3.3  |      | 4.1  |
| <i>LINC01416</i> |      |       | 3.3  |      |      |      |     |      |      |      |      |
| <i>LINC01443</i> |      |       |      |      |      |      |     | 6.5  |      |      |      |
| <i>LINC01444</i> |      |       |      |      |      |      |     | 6.5  |      |      |      |
| <i>LINC01477</i> |      |       |      |      |      |      |     | 4.3  |      |      | 4.8  |
| <i>LINC01538</i> |      | 5.1   | 4.1  | 3.3  |      |      |     | 23   |      |      |      |
| <i>LINC01539</i> |      |       | 4.4  |      |      |      |     |      |      |      | 4.8  |
| <i>LINC01541</i> |      |       | 3.9  | 4.6  |      |      |     | 24.8 |      | 3.2  |      |
| <i>LINC01543</i> |      |       |      |      |      | 3.7  | 5.1 | 4.3  |      |      | 6.1  |
| <i>LINC01544</i> |      |       | 4.4  | 3.4  |      |      |     |      |      |      |      |
| <i>LINC01630</i> |      |       | 5    |      |      |      |     | 24.8 |      |      | 3.6  |
| <i>LINC01915</i> |      |       | 4.4  |      |      |      | 3.1 | 8.7  |      |      | 3.4  |
| <i>LINC01917</i> |      |       |      |      |      |      |     | 3.8  |      |      |      |
| <i>LINC01919</i> |      |       | 4.4  |      |      |      |     | 3.8  |      |      |      |
| <i>LINC01924</i> |      | 5.1   | 4.1  | 3.6  |      |      |     | 23.9 |      |      |      |
| <i>LINC01929</i> |      |       | 4.4  |      |      |      |     |      |      |      |      |
| <i>LINC02582</i> |      |       | 4.1  | 4.6  |      |      |     | 24.8 |      | 3.1  |      |
| <i>LINC02864</i> |      |       | 4.1  | 4.6  |      |      |     | 24.8 |      | 3.1  |      |

\*gene amplifications and deletions with frequencies > 3% are highlighted green and yellow colors, respectively; Data for analysis of copy number variations was retrieved from cBioPortal [S1].

Cancer cohorts used were the following:

BLCA - bladder urothelial carcinoma (TCGA cohort, PanCancer Atlas, n=411); mBRCA – metastatic breast invasive carcinoma (The Metastatic Breast Cancer Project (Provisional, December 2021), n=379); ESCA - esophageal carcinoma (TCGA cohort, PanCancer Atlas, n=182); HNSC - head and neck squamous cell carcinoma (TCGA cohort, PanCancer Atlas, n=523); LUAD - lung adenocarcinoma (Broad cohort, Cell 2012, n=183); LUSC - lung squamous cell carcinoma (TCGA cohort, PanCancer Atlas, n=487); OV - ovarian serous cystadenocarcinoma (TCGA cohort, PanCancer Atlas, n=584); PAAD - pancreatic adenocarcinoma (UTSW cohort, Nat Commun 2015, n=109; TCGA cohort, PanCancer Atlas, n=184); PRAD - prostate adenocarcinoma (Fred Hutchinson CRC, Nat Med 2016, n=154; Broad/Cornell cohort, Nat Genet 2012, n=112); SARC – sarcoma (TCGA cohort, PanCancer Atlas, n=255); STAD - stomach adenocarcinoma (TCGA cohort, PanCancer Atlas, n=440; (OncoSG cohort, 2018, n=147).

## References

[S1] Cerami, E.; Gao, J.; Dogrusoz, U.; Gross, B.E.; Sumer, S.O.; Aksoy, B.A.; Jacobsen, A.; Byrne, C.J.; Heuer, M.L.; Larsson, E.; et al. The cBio Cancer Genomics Portal: An Open Platform for Exploring Multidimensional Cancer Genomics Data. Cancer Discov 2012, 2, 401–404, doi:10.1158/2159-8290.CD-12-0095.
