# Supplementary material for: Long Intergenic Non-Coding RNAs of Human Chromosome 18: Focus on Cancers
Source: MDPI journal article supplement (doi:10.3390/biomedicines12030544), 2024-02-28
Supplement: s1 [file s1]

Table S15. Associations of individual lincRNAs of human chromosome 18 with pathways in cancers (predicted via pathway terms enrichment analysis of highly co-expressed genes)

| Pathways / Genes | AJ                  | AMPK                                        | ErbB                                | FA                          | FoxO                                                | MAPK                                | mTOR                                                | Hippo                       | p53                         | PI3K-Akt     |
|------------------|---------------------|---------------------------------------------|-------------------------------------|-----------------------------|-----------------------------------------------------|-------------------------------------|-----------------------------------------------------|-----------------------------|-----------------------------|--------------|
| <i>LINC00470</i> | CHOL<br>KIRC        | CHOL<br>KIRC                                | CHOL<br>KIRC                        | CHOL<br>KIRC                | CHOL<br>KIRC                                        | CHOL<br>KIRC                        | CHOL<br>KIRC                                        | KIRC                        | CHOL<br>KIRC                | KIRC         |
| <i>LINC00526</i> | CHOL<br>THYM<br>UVM | CHOL<br>KICH<br>PAAD<br>TGCT<br>THYM<br>UVM | CHOL<br>PAAD<br>TGCT<br>THYM<br>UVM | CHOL<br>PAAD<br>THYM<br>UVM | CHOL<br>KICH<br>PAAD<br>PCPG<br>TGCT<br>THYM<br>UVM | CHOL<br>PAAD<br>TGCT<br>THYM<br>UVM | CHOL<br>KICH<br>PAAD<br>PCPG<br>TGCT<br>THYM<br>UVM | CHOL<br>TGCT<br>THYM<br>UVM | THYM<br>UVM                 |              |
| <i>LINC00667</i> | KIRC<br>LGG<br>TGCT | CHOL<br>KIRC<br>LGG<br>TGCT<br>UVM          | KIRC<br>LGG<br>TGCT                 | KIRC<br>LGG<br>TGCT         | CHOL<br>KIRC<br>LGG<br>TGCT                         | CHOL<br>KIRC<br>LGG<br>TGCT         | CHOL<br>KIRC<br>LGG<br>TGCT                         | KIRC<br>LGG<br>TGCT         | KIRC<br>KIRP<br>LGG<br>TGCT | KIRP<br>TGCT |
| <i>LINC00668</i> | THCA                | THCA                                        |                                     |                             | THCA                                                | THCA                                | THCA                                                | CHOL                        |                             |              |
| <i>LINC00907</i> | UVM                 | UVM                                         | UVM                                 | UVM                         | UVM                                                 | UVM                                 | UVM                                                 | UVM                         | UVM                         | UVM          |
| <i>LINC01254</i> | GBM<br>KIRP         | KIRP                                        | KIRP                                | GBM<br>STAD                 | GBM<br>KIRP                                         | KIRP                                | KIRP                                                | KIRP                        | KIRP                        |              |
| <i>LINC01378</i> |                     |                                             |                                     |                             |                                                     |                                     | KIRC                                                | KIRC                        |                             |              |
| <i>LINC01415</i> | UVM                 | LUAD<br>UVM                                 | UVM                                 | LUAD<br>UVM                 | UVM                                                 | UVM                                 | UVM                                                 | UVM                         |                             |              |
| <i>LINC01416</i> | ESCA                | ESCA                                        | ESCA                                | ESCA<br>KICH                | ESCA                                                | ESCA                                | ESCA                                                | ESCA                        | ESCA                        | ESCA         |
| <i>LINC01443</i> |                     |                                             |                                     | LUAD                        |                                                     |                                     |                                                     |                             |                             |              |
| <i>LINC01444</i> |                     |                                             | UCEC                                | UCEC                        | UCEC                                                | UCEC                                |                                                     | UCEC                        |                             | UCEC         |
| <i>LINC01477</i> | MESO                |                                             |                                     | ACC                         |                                                     |                                     |                                                     |                             |                             |              |
| <i>LINC01478</i> | LUSC                | LUSC                                        | LUSC                                | LUSC                        | LUSC                                                | LUSC                                | LUSC                                                |                             | LUSC                        | LUSC         |
| <i>LINC01538</i> |                     |                                             |                                     |                             | PAAD                                                |                                     | PAAD                                                |                             |                             |              |
| <i>LINC01539</i> | TGCT                |                                             |                                     | TGCT                        |                                                     |                                     | TGCT                                                | TGCT                        |                             | TGCT         |
| <i>LINC01541</i> | HNSC<br>LUAD        | HNSC                                        |                                     | HNSC<br>LUAD                |                                                     |                                     |                                                     |                             |                             | HNSC         |
| <i>LINC01544</i> | UVM                 |                                             |                                     |                             |                                                     |                                     |                                                     |                             |                             |              |

\*co-expressed genes with Pearson correlation coefficient  $r \geq 0.7$  in different cancer types were retrieved from TCGA database using web-based tool GEPIA2; functional enrichment of gene set with KEGG pathway term was performed using web-based tool NCpath (terms were selected by adj. p-value < 0.01).

KEGG pathways terms: AJ - adherent junction, AMPK - 5' AMP-activated protein kinase signaling pathway, ErbB - ErbB signaling pathway, FA - focal adhesion, FoxO - FoxO signaling pathway, MAPK - MAPK signaling pathway, mTOR - mTOR signaling pathway, Hippo - Hippo signaling pathway, p53 - p53 signaling pathway, PI3K-Akt - signaling pathway with participation of phosphoinositide 3-kinase and Akt kinase.

ACC - Adrenocortical carcinoma,

CHOL - Cholangiocarcinoma,

ESCA - Esophageal carcinoma,

HNSC - Head and neck squamous cell carcinoma,

KIRC - Kidney renal clear cell carcinoma,

KIRP - Kidney renal papillary cell carcinoma,

KICH - Kidney chromophobe,

LGG - Low-grade glioma,

LUAD - Lung adenocarcinoma,

LUSC - Lung squamous cell carcinoma,

MESO - Mesothelioma,

PAAD - Pancreatic adenocarcinoma,

TGCT - Testicular germ cell tumors,

UCEC - Uterine Corpus Endometrial Carcinoma,

UVM - Uveal Melanoma
