# Supplementary material for: Long Intergenic Non-Coding RNAs of Human Chromosome 18: Focus on Cancers
Source: MDPI journal article supplement (doi:10.3390/biomedicines12030544), 2024-02-28
Supplement: s1 [file s1]

Table S20. Anticancer drug candidates predicted by transcriptomic signatures of linc-genes encoding lincRNAs of human chromosome 18 in cancer cell lines.

| Predicted drugs<br>(p-value <0.1) | Drug concentration** | Cell line | Cancer type              |
|-----------------------------------|----------------------|-----------|--------------------------|
| <i>Canagliflozin</i> *            | 0.25 $\mu$ M         | THP1      | Leukemia                 |
| <i>Conivaptan</i>                 | 0.03 $\mu$ M         | YAPC      | Pancreatic carcinoma     |
| <i>Darapladib</i>                 | 0.08 $\mu$ M         | PC3       | Prostate adenocarcinoma  |
| <i>Dipraglurant</i>               | 0.03 $\mu$ M         | PC3       | Prostate adenocarcinoma  |
| <i>Fluticasone-propionate</i>     | 0.08 $\mu$ M         | JURKAT    | Leukemia                 |
| Givinostat                        | 0.66 $\mu$ M         | HAP1      | Chronic myeloid leukemia |
| Ibrutinib                         | 0.66 $\mu$ M         | TMD8      | Lymphoma                 |
| Lapatinib                         | 0.66 $\mu$ M         | BJAB      | Lymphoma                 |
| Lucitanib                         | 0.08 $\mu$ M         | PC3       | Prostate adenocarcinoma  |
| <i>Methapyrilene</i>              | 0.66 $\mu$ M         | HEPG2     | Liver carcinoma          |
| <i>Primaquine</i>                 | 0.37 $\mu$ M         | HT29      | Colon adenocarcinoma     |
| Quizartinib                       | 0.08 $\mu$ M         | MCF10A    | Breast carcinoma         |
| Rebastinib                        | 0.37 $\mu$ M         | JURKAT    | Leukemia                 |
| <i>Talinolol</i>                  | 0.37 $\mu$ M         | MDAMB231  | Breast adenocarcinoma    |
| <i>Tizanidine</i>                 | 0.12 $\mu$ M         | PC3       | Prostate adenocarcinoma  |
| Tozasertib                        | 0.12 $\mu$ M         | OCILY19   | Lymphoma                 |

\* Repositioning drugs as anti-cancer agents are highlighted with italic font;

\*\*Cell lines were exposed to drugs for 24 h.

\*\*\* SigCom-Library web-based tool (<https://maayanlab.cloud/sigcom-lincs/#/SignatureSearch/UpDown>) was used to analyze transcriptomic profiling data of cancer cell lines being exposed to various concentrations of drugs.
