# Supplementary material for: Long Intergenic Non-Coding RNAs of Human Chromosome 18: Focus on Cancers
Source: MDPI journal article supplement (doi:10.3390/biomedicines12030544), 2024-02-28
Supplement: s1 [file s1]

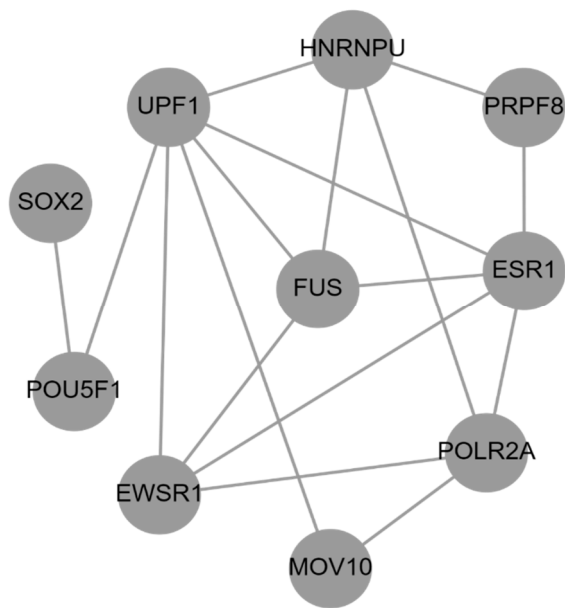

Figure S5. The subnetwork of protein-protein interactions of lincRNA-binding proteins using the Biogrid database as a data source (original output from WebGestalt server).

Abbreviations:

ESR1, estrogen receptor 1

EWSR1, EWS RNA binding protein 1

FUS, FUS RNA binding protein

HNRNPU, heterogeneous nuclear ribonucleoprotein U

MOV10, Mov10 RNA helicase

POLR2A, RNA polymerase II subunit A

POU5F1, POU class 5 homeobox 1

PRPF8, pre-mRNA processing factor 8

SOX2, SRY-box transcription factor 2

UPF1, UPF1 RNA helicase and ATPase
