# Supplementary material for: Long Intergenic Non-Coding RNAs of Human Chromosome 18: Focus on Cancers
Source: MDPI journal article supplement (doi:10.3390/biomedicines12030544), 2024-02-28
Supplement: s1 [file s1]

Table S5. Gene Expression Omnibus (GEO) datasets used to search for differentially expressed linc-genes

|                                                                                                                                                                                                                                                                                                                                                       |
|-------------------------------------------------------------------------------------------------------------------------------------------------------------------------------------------------------------------------------------------------------------------------------------------------------------------------------------------------------|
| GSE1379, GSE3292, GSE3578, GSE3744, GSE5764, GSE6919, GSE8401, GSE10245, GSE10270, GSE12452, GSE14407, GSE15471, GSE15490, GSE15781, GSE16515, GSE21261, GSE21510, GSE22035, GSE24514, GSE25136, GSE26511, GSE27831, GSE28702, GSE28703, GSE28996, GSE32323, GSE32962, GSE35144, GSE35809, GSE38376, GSE43346, GSE43837, GSE49515, GSE51373, GSE55945 |
|-------------------------------------------------------------------------------------------------------------------------------------------------------------------------------------------------------------------------------------------------------------------------------------------------------------------------------------------------------|
