# Supplementary material for: Long Intergenic Non-Coding RNAs of Human Chromosome 18: Focus on Cancers
Source: MDPI journal article supplement (doi:10.3390/biomedicines12030544), 2024-02-28
Supplement: s1 [file s1]

Table S6. Condition-specific expression of linc-genes of human chromosome 18.

| Gene      | GEO dataset   | log <sub>2</sub> FC* (p-value) | Description                                                                                      |
|-----------|---------------|--------------------------------|--------------------------------------------------------------------------------------------------|
| LINC00305 | GSE51373 [S1] | -1.39 (p<0.05)                 | High-grade serous ovarian cancer resistant (n=12) vs sensitive (n=16) to platinum-based therapy. |
| LINC00305 | GSE43837 [S2] | -0.96 (p<0.1)                  | Breast cancer with brain metastasis (n=19) vs non-metastatic breast cancer (n=19).               |
| LINC00907 | GSE43837 [S2] | -0.97 (p<0.1)                  |                                                                                                  |
| LINC01387 | GSE43837 [S2] | -1.03 (p<0.05)                 |                                                                                                  |
| LINC00305 | GSE14407 [S3] | 0.96 (p<0.1)                   | Serous ovarian cancer epithelia (n=120) vs normal ovarian surface epithelia (n=12)               |
| LINC00668 | GSE14407 [S3] | 1.37 (p<0.05)                  |                                                                                                  |
| LINC01254 | GSE14407 [S3] | 1.34 (p<0.005)                 |                                                                                                  |
| LINC01415 | GSE14407 [S3] | 1.35 (p<0.05)                  |                                                                                                  |
| LINC01477 | GSE14407 [S3] | 1.47 (p<0.05)                  |                                                                                                  |
| LINC01538 | GSE14407 [S3] | 0.91 (p<0.05)                  |                                                                                                  |
| LINC01539 | GSE14407 [S3] | 1.84 (p<0.001)                 |                                                                                                  |
| LINC01478 | GSE15781 [S4] | 0.86 (p<0.05)                  | Irradiated colorectal tumor tissue (n=19) vs non-irradiated tumor tissue (n=23)                  |

\*log<sub>2</sub>FC - log<sub>2</sub>FoldChange

## References

- [S1] Koti, M.; Gooding, R.J.; Nuin, P.; Haslehurst, A.; Crane, C.; Weberpals, J.; Childs, T.; Bryson, P.; Dharsee, M.; Evans, K.; et al. Identification of the IGF1/PI3K/NF κB/ERK Gene Signalling Networks Associated with Chemotherapy Resistance and Treatment Response in High-Grade Serous Epithelial Ovarian Cancer. *BMC Cancer* 2013, 13, 549, doi:10.1186/1471-2407-13-549.
- [S2] McMullin, R.P.; Wittner, B.S.; Yang, C.; Denton-Schneider, B.R.; Hicks, D.; Singavarapu, R.; Moulis, S.; Lee, J.; Akbari, M.R.; Narod, S.A.; et al. A BRCA1 Deficient-like Signature Is Enriched in Breast Cancer Brain Metastases and Predicts DNA Damage-Induced Poly (ADP-Ribose) Polymerase Inhibitor Sensitivity. *Breast Cancer Res* 2014, 16, R25, doi:10.1186/bcr3625.
- [S3] Bowen, N.J.; Walker, L.D.; Matyunina, L.V.; Logani, S.; Totten, K.A.; Benigno, B.B.; McDonald, J.F. Gene Expression Profiling Supports the Hypothesis That Human Ovarian Surface Epithelia Are Multipotent and Capable of Serving as Ovarian Cancer Initiating Cells. *BMC Med Genomics* 2009, 2, 71, doi:10.1186/1755-8794-2-71.
- [S4] Snipstad, K.; Fenton, C.G.; Kjaeve, J.; Cui, G.; Anderssen, E.; Paulssen, R.H. New Specific Molecular Targets for Radio-Chemotherapy of Rectal Cancer. *Mol Oncol* 2010, 4, 52–64, doi:10.1016/j.molonc.2009.11.002.
