# Supplementary material for: Long Intergenic Non-Coding RNAs of Human Chromosome 18: Focus on Cancers
Source: MDPI journal article supplement (doi:10.3390/biomedicines12030544), 2024-02-28
Supplement: s1 [file s1]

Table S24. Local sequence alignment and similar secondary structures motifs of lincRNAs of human chromosome 18.

| Local sequence alignment*                                                                                                                                                                                                                                                                                                |       |      |        |           |      |        |     |       |          |          | Protein interactors** |                                                         |                 |
|--------------------------------------------------------------------------------------------------------------------------------------------------------------------------------------------------------------------------------------------------------------------------------------------------------------------------|-------|------|--------|-----------|------|--------|-----|-------|----------|----------|-----------------------|---------------------------------------------------------|-----------------|
| LINC01916                                                                                                                                                                                                                                                                                                                |       |      |        | LINC01415 |      |        |     | Score | %id      | P-Value  | E-Value               | PABPC1<br>MBNL1<br>RBMX<br>KHDRBS3<br>ELAVL1<br>SFRS13A |                 |
| Rank                                                                                                                                                                                                                                                                                                                     | Start | Stop | Strand | Start     | Stop | Strand |     |       |          |          |                       |                                                         |                 |
| 1                                                                                                                                                                                                                                                                                                                        | 826   | 1018 | +      | 5544      | 5736 | +      | 454 | 45    | 6.40E-02 | 6.60E-02 |                       |                                                         |                 |
| ..... 1 ..... 2 ..... 3 ..... 4 ..... 5 ..... 6<br>AUUGAAUUUUAAUAUUUAUAUUAUGAAAUGAUCUGCCACUGUUUUUGUAAGUGUACCUG<br>AUUUCUAUCGAAUCUUUAUGCAAUUAGGUUACUGAACUUUUGAAAUCAAAGGAGGAAAUC<br>..(((((((.....((.....)).....((.....)))).....))<br>..EEEEEE.CCCCC.....AA.....aa.....BB.BBBB.....bbbb.....bb                             |       |      |        |           |      |        |     |       |          |          |                       |                                                         |                 |
| ..... 7 ..... 8 ..... 9 ..... 0 ..... 1 ..... 2<br>CUAUUAUGACUAUAUUUUCAGUUAAGAUUCAUGACGUUUUUGUGAGAAAAUAUUU- UA<br>AGAUUUUGUGGUUUUGCCCAGUAUACUAUAGAAUGUCAAUUUUGUUCUAUUUAUAAAAUA<br>..))))))((((.....)))))).....)))))).....(((((((.....((.....)).....))<br>.ccccccDDDD.....dddd.....eeeeeee.JJJJFFFFFFFF.....FF.....ff.f f |       |      |        |           |      |        |     |       |          |          |                       |                                                         |                 |
| ..... 3 ..... 4 ..... 5 ..... 6 ..... 7 ..... 8<br>AAAACUUGU- UAAUUUUUUCAGAUUAACUACAAAAAAUCUAUUGUAAAAUUUAUAAAAU<br>AUAUUCUAUAUAUUUAUUCUUAUA- - UUGAACAACUAUUCUAUAUAUAAUAUGCUA<br>..)))).....(((.....((((.....((.....)))))).....)))).....((.....<br>ffffff.....IIII.....GGGGG...GGGGG.....ggggg...ggggg.HH....            |       |      |        |           |      |        |     |       |          |          |                       |                                                         |                 |
| ..... 9 .....<br>ACUAAUAUAUAAGUC<br>AUAUAAGAAUAAGAC<br>..)).....)).....))<br>..hh.....iiii.jjj                                                                                                                                                                                                                           |       |      |        |           |      |        |     |       |          |          |                       |                                                         |                 |
| Актив                                                                                                                                                                                                                                                                                                                    |       |      |        |           |      |        |     |       |          |          |                       |                                                         |                 |
| LINC01916                                                                                                                                                                                                                                                                                                                |       |      |        | LINC01415 |      |        |     | Score | %id      | P-Value  | E-Value               |                                                         | Pum2<br>KHDRBS3 |
| Rank                                                                                                                                                                                                                                                                                                                     | Start | Stop | Strand | Start     | Stop | Strand |     |       |          |          |                       |                                                         |                 |
| 2                                                                                                                                                                                                                                                                                                                        | 599   | 657  | +      | 4381      | 4440 | +      | 447 | 57    | 7.45E-02 | 7.74E-02 |                       |                                                         |                 |
| ..... 1 ..... 2 ..... 3 ..... 4 ..... 5 ..... 6<br>UAUAUGUCAUGAUUAAUGUUAUCUAU- AAUGAGUGUAUUAGGGAUACAUAUAAUUAUCACA<br>UACAUAUAAAAUGUUAAGAUAUAUUUAGAUAAAUGUAUCAAGUAUUUUUUAUUUUUUUA<br>.....(((((((.....((.....)))))).....)))).....)))).....((.....<br>.....AAA.AA.AAAAAAA.AAAA.....AAAA.....aaaa.....aaaaa.....aaa         |       |      |        |           |      |        |     |       |          |          |                       |                                                         |                 |
|                                                                                                                                                                                                                                                                                                                          |       |      |        |           |      |        |     |       |          |          |                       |                                                         |                 |
|                                                                                                                                                                                                                                                                                                                          |       |      |        |           |      |        |     |       |          |          |                       |                                                         |                 |
|                                                                                                                                                                                                                                                                                                                          |       |      |        |           |      |        |     |       |          |          |                       |                                                         |                 |
|                                                                                                                                                                                                                                                                                                                          |       |      |        |           |      |        |     |       |          |          |                       |                                                         |                 |
|                                                                                                                                                                                                                                                                                                                          |       |      |        |           |      |        |     |       |          |          |                       |                                                         |                 |
|                                                                                                                                                                                                                                                                                                                          |       |      |        |           |      |        |     |       |          |          |                       |                                                         |                 |

| LINC02564                                                                       |       |      |        | LINC01919 |      |        |     | Score | %id      | P-Value  | E-Value | a2bp1<br>EIF4B<br>MBNL1<br>Vts1<br>RBMX<br>KHDRBS3 |
|---------------------------------------------------------------------------------|-------|------|--------|-----------|------|--------|-----|-------|----------|----------|---------|----------------------------------------------------|
| Rank                                                                            | Start | Stop | Strand | Start     | Stop | Strand |     |       |          |          |         |                                                    |
| 1                                                                               | 65    | 265  | +      | 212       | 408  | +      | 645 | 34    | 2.50E-03 | 2.50E-03 |         |                                                    |
| ..... 1 ..... 2 ..... 3 ..... 4 ..... 5 ..... 6                                 |       |      |        |           |      |        |     |       |          |          |         |                                                    |
| GCGGGCGGUCCAGGGCCGCCUGGCGCAGCAGCCUGUCCAGCCGCGGUCCCCUGCAGUCCCU                   |       |      |        |           |      |        |     |       |          |          |         |                                                    |
| UUUUUCUUCUGAAACCUCUGCAGUGGUAG- - CAAUGCACUGAAGUUUGAUUAAAAGUUU                   |       |      |        |           |      |        |     |       |          |          |         |                                                    |
| ((((((((.....((((((((((((.....((.....))).....)))((((.....((.....))).....)))     |       |      |        |           |      |        |     |       |          |          |         |                                                    |
| IIIGGGG.....GGGGGGEEAAA..AA.....aaaDD...BB.....                                 |       |      |        |           |      |        |     |       |          |          |         |                                                    |
| ..... 7 ..... 8 ..... 9 ..... 0 ..... 1 ..... 2                                 |       |      |        |           |      |        |     |       |          |          |         |                                                    |
| CCCUGGCGGCGUGCGCAGCCGUCCACGACAGGGGCCAUAAACUCUCCAG- AGCGGAAAGC                   |       |      |        |           |      |        |     |       |          |          |         |                                                    |
| ACUGGUCAUUCUGCCAUGAGAGAUGAUAGAGAAUAUCACCACAGUGUGACUUGCUUC                       |       |      |        |           |      |        |     |       |          |          |         |                                                    |
| ))(((.....))).....)).....)).....)).....(((((.....))).....))                     |       |      |        |           |      |        |     |       |          |          |         |                                                    |
| bbCCC.CC.....cccc..dd.....ee.....FFFF..FFFF...f                                 |       |      |        |           |      |        |     |       |          |          |         |                                                    |
| ..... 3 ..... 4 ..... 5 ..... 6 ..... 7 ..... 8                                 |       |      |        |           |      |        |     |       |          |          |         |                                                    |
| CGCACCCUGGUGGCCCGGCCCGCGCCAGACCUGGCGGCGCGUGGCACCUGACCCGCGUG                     |       |      |        |           |      |        |     |       |          |          |         |                                                    |
| AAGGCAGCAUGGUUUC AUGCAGAGGAUCUAAACUGGGGACCAUGUGC- - - UGGGCUGCAA                |       |      |        |           |      |        |     |       |          |          |         |                                                    |
| )).....))).....)).....)).....(((((.....((.....((.....))).....))                 |       |      |        |           |      |        |     |       |          |          |         |                                                    |
| fff...fffffgggggg.....ggggg...HH.HHHHHH..HH...HHH.....hhh.                      |       |      |        |           |      |        |     |       |          |          |         |                                                    |
| ..... 9 ..... 0 ..                                                              |       |      |        |           |      |        |     |       |          |          |         |                                                    |
| CAUGGGUCUCCAGGGAGCUCGC                                                          |       |      |        |           |      |        |     |       |          |          |         |                                                    |
| AAGGGCUGUGCAGUGCCUAAAA                                                          |       |      |        |           |      |        |     |       |          |          |         |                                                    |
| .....)).....)).....)).....)).....))                                             |       |      |        |           |      |        |     |       |          |          |         |                                                    |
| ... hhhh... hhhh... hhi i i                                                     |       |      |        |           |      |        |     |       |          |          |         |                                                    |
| Актив                                                                           |       |      |        |           |      |        |     |       |          |          |         |                                                    |
| LINC02564                                                                       |       |      |        | LINC01919 |      |        |     | Score | %id      | P-Value  | E-Value | MBNL1<br>RBMX<br>ELAVL1<br>KHDRBS3                 |
| Rank                                                                            | Start | Stop | Strand | Start     | Stop | Strand |     |       |          |          |         |                                                    |
| 2                                                                               | 617   | 718  | +      | 386       | 485  | +      | 416 | 48    | 8.06E-02 | 8.41E-02 |         |                                                    |
| ..... 1 ..... 2 ..... 3 ..... 4 ..... 5 ..... 6                                 |       |      |        |           |      |        |     |       |          |          |         |                                                    |
| AAGUAGCUGGAACUACAGAUGUGCACUGCCAUGCCAGGCUUGUCUAACAUAU- UUUAUGUG                  |       |      |        |           |      |        |     |       |          |          |         |                                                    |
| AAAGGGCUGUGCAG- - - UGCCUAAAUGUUAUGCAAAAUUUUAUAAAGGUAGGUCAUGUA                  |       |      |        |           |      |        |     |       |          |          |         |                                                    |
| ((.....(((.....(((.....(((.....((.....))).....))).....((.....((.....))).....))) |       |      |        |           |      |        |     |       |          |          |         |                                                    |
| EE.CCCC...CCC...AAAAA.AA..AAA.....aaaaa...aaaaa...BBB..                         |       |      |        |           |      |        |     |       |          |          |         |                                                    |
| ..... 7 ..... 8 ..... 9 ..... 0 ..                                              |       |      |        |           |      |        |     |       |          |          |         |                                                    |
| UUGCUCACUCCAGUUUGCUAGAGUUUUUGGAGAUUUCUGUCUU                                     |       |      |        |           |      |        |     |       |          |          |         |                                                    |
| UUGCUCCAUUGAUGCUGCCCUUAUUC AUGAUGAUUAAAGCCUU                                    |       |      |        |           |      |        |     |       |          |          |         |                                                    |
| .....)).....)).....)).....((.....((.....)).....)).....))                        |       |      |        |           |      |        |     |       |          |          |         |                                                    |
| ..... bbb...ccc.ccccDDD.DD.....dd.ddd...ee                                      |       |      |        |           |      |        |     |       |          |          |         |                                                    |

[illegible]

[illegible]



\*\*web-based tool ‘linc2function’ [S2] (<https://bioinformatics-lab.erc.monash.edu/linc2function>) was used for prediction of proteins, interacting with motifs of lincRNAs: modes – ‘ANN’ and ‘full model’, species – ‘Homo sapiens’.

Abbreviations:

a2bp1, RNA binding fox-1 homolog 1;

EIF4B, eukaryotic translation initiation factor 4B;

ELAVL1, ELAV like RNA binding protein 1;

FUS, FUS RNA binding protein;

KHDRBS3, KH RNA binding domain containing, signal transduction associated 3;

KHSRP, KH-type splicing regulatory protein;

MBNL1, muscleblind like splicing regulator 1;

PABPC1, poly(A) binding protein cytoplasmic 1;

Pum2, pumilio RNA binding family member 2;

RBMX RNA binding motif protein X-linked;

SFRS1, serine and arginine rich splicing factor 1;

SFRS13A, serine and arginine rich splicing factor 10;

SFRS9, serine and arginine rich splicing factor 9.

## References

[S1] Sundfeld D, Havgaard JH, de Melo AC, Gorodkin J. Foldalign 2.5: multithreaded implementation for pairwise structural RNA alignment. *Bioinformatics*. 2016;32(8):1238-40. doi: 10.1093/bioinformatics/btv748.

[S2] Ramakrishnaiah Y, Morris AP, Dhaliwal J, Philip M, Kuhlmann L, Tyagi S. Linc2function: A Comprehensive Pipeline and Webserver for Long Non-Coding RNA (lncRNA) Identification and Functional Predictions Using Deep Learning Approaches. *Epigenomes*. 2023;7(3):22. doi: 10.3390/epigenomes7030022
