# Supplementary material for: Long Intergenic Non-Coding RNAs of Human Chromosome 18: Focus on Cancers
Source: MDPI journal article supplement (doi:10.3390/biomedicines12030544), 2024-02-28
Supplement: s1 [file s1]

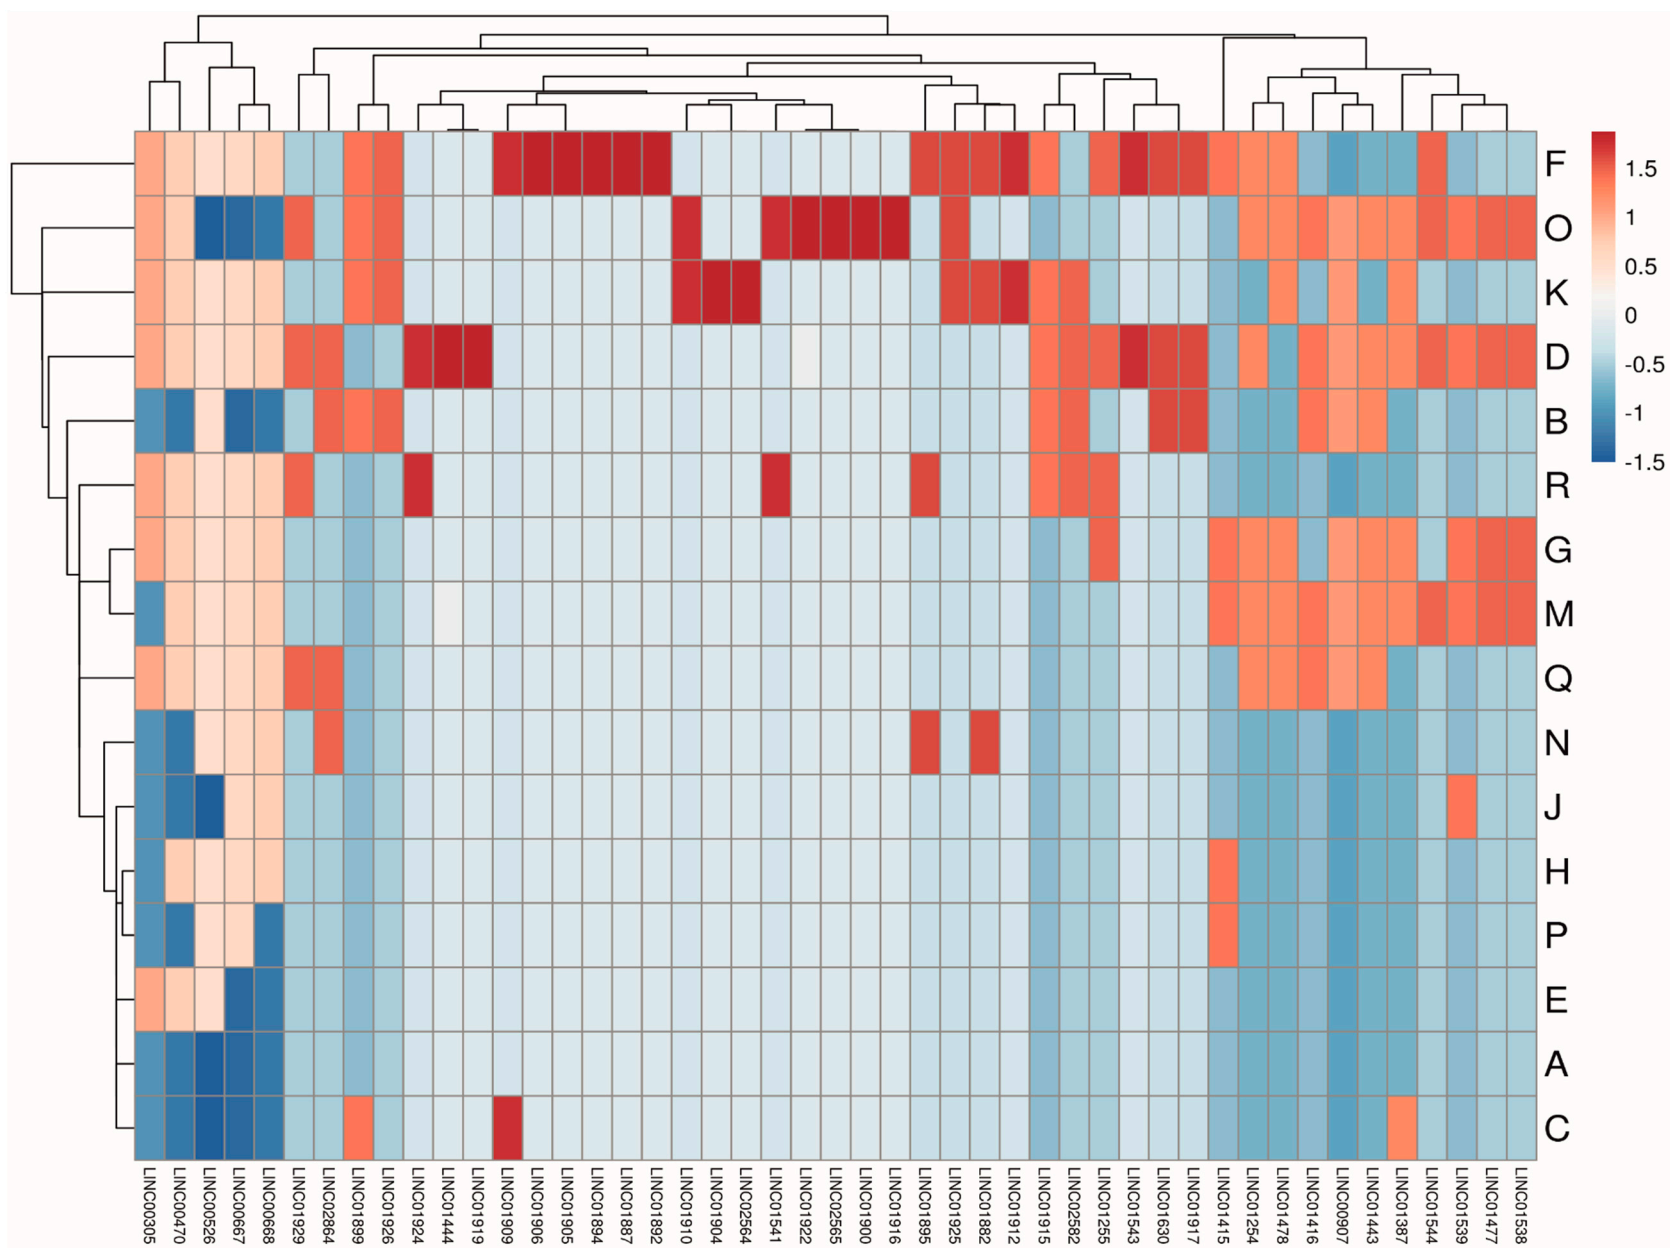

Figure S7. Clustered heat map of characteristics distribution of studied lincRNAs of human chromosome 18.

Principal component analysis (PCA) was performed using ClustVis (<https://biit.cs.ut.ee/clustvis/>) with following settings: pre-processing options – ‘no transformation’, ‘row centering’, ‘no scaling’ was applied to rows; SVD with imputation is used to calculate principal components. X- and Y-axis show PC-1 and PC-2 that explain 26.6% and 17.2% of the total variance, respectively.

Heat map options – columns are centered, no scaling is applied to columns, imputation is used for missing value estimation, rows are clustered using Manhattan distance and single linkage, and columns are clustered using Manhattan distance and average linkage.

Right color scale denotes cluster distances.

#### Figure legend

| Hallmark symbol | Description of hallmark                              | Conditions    |
|-----------------|------------------------------------------------------|---------------|
| A               | Somatic gene mutations                               | Cancer        |
| B               | Gene fusions                                         | Cancer/Normal |
| C               | Gene knockouts effects                               | Cancer/Normal |
| D               | Copy number variations (amplifications or deletions) | Cancer        |
| E               | Differential promoter methylation                    | Cancer        |
| F               | Tissue-specific expression                           | Normal        |
| G               | Type-specific differential expression                | Cancer        |
| H               | Subtype-specific differential expression             | Cancer        |
| J               | Interactions with microRNAs                          | Cancer        |
| K               | Interactions with cellular proteins                  | Cancer        |
| M               | Predicted involvement in cancer-associated pathways  | Cancer        |
| N               | smORF-proteins                                       | Cancer        |
| O               | Potential prognostic value                           | Cancer        |
| P               | Potential predictive value                           | Cancer        |
| Q               | Gene expression signatures for drug predictions      | Cancer        |
| R               | Literature data                                      | Cancer        |
