# Supplementary material for: Long Intergenic Non-Coding RNAs of Human Chromosome 18: Focus on Cancers
Source: MDPI journal article supplement (doi:10.3390/biomedicines12030544), 2024-02-28
Supplement: s1 [file s1]

Table S17. Cancer-associated biologic processes and interactions between lincRNAs of human chromosome 18 and cellular proteins\*

| Cancer type                  | lincRNA   | Protein symbol | Influenced process in cancer cells**                                                        |
|------------------------------|-----------|----------------|---------------------------------------------------------------------------------------------|
| Gastric cancer               | LINC00470 | PTEN           | proliferation(+); migration(+); invasion(+)                                                 |
| Liver carcinoma              | LINC00470 | ILF2           | proliferation(+)                                                                            |
| Liver carcinoma              | LINC00470 | ILF3           | proliferation(+)                                                                            |
| Malignant glioma             | LINC00526 | AXL            | proliferation(+); migration(+); invasion(+); growth(+); PI3K/AKT/NF-kB signaling pathway(+) |
| Nephroblastoma               | LINC00667 | IKBKB          | cancer progression(+)                                                                       |
| Esophageal cancer            | LINC00667 | SLC2A3         | proliferation(+); invasion(+); migration(+)                                                 |
| Gastric cancer               | LINC00668 | CDKN2B         | proliferation(+)                                                                            |
| Oral squamous cell carcinoma | LINC00668 | VEGFA          | cancer progression(+)                                                                       |
| Gastric cancer               | LINC00668 | E2F1           | proliferation(+)                                                                            |
| Gastric cancer               | LINC00668 | CDKN1C         | proliferation(+)                                                                            |
| Colorectal cancer            | LINC00668 | USP47          | proliferation(+); migration(+); apoptosis (-); malignant transformation(+)                  |
| Gastric cancer               | LINC00668 | SUZ12          | proliferation(+)                                                                            |
| Gastric cancer               | LINC00668 | EZH2           | proliferation(+)                                                                            |
| Gastric cancer               | LINC00668 | CDKN1B         | proliferation(+)                                                                            |
| Gastric cancer               | LINC00668 | CDKN2A         | proliferation(+)                                                                            |
| Non-small cell lung cancer   | LINC00668 | KLF7           | proliferation(+); invasion(+); migration(+); apoptosis(-)                                   |
| Non-small cell lung cancer   | LINC00668 | STAT3          | proliferation(+); invasion(+); migration(+); apoptosis(-)                                   |
| Breast cancer                | LINC02582 | CHEK1          | radiosensitivity(-)                                                                         |

\* Data was retrieved from LncBase v.3.0 [S1] (<https://diana.e-ce.uth.gr/lncbasev3/interactions>).

\*\* (+) and (-) – induction and inhibition of biological process, respectively.

Abbreviations:

PTEN, phosphatase and tensin homolog;

ILF2, interleukin enhancer binding factor 2;

ILF3, interleukin enhancer binding factor 3;

AXL, AXL receptor tyrosine kinase;

IKBKB, inhibitor of nuclear factor kappa B kinase subunit beta;

SLC2A3, solute carrier family 2 member 3;

CDKN2B, cyclin dependent kinase inhibitor 2B;

VEGFA, vascular endothelial growth factor A;

E2F1, E2F transcription factor 1;

CDKN1C, cyclin dependent kinase inhibitor 1C;

USP47, ubiquitin specific peptidase 47;

SUZ12, SUZ12 polycomb repressive complex 2 subunit;

EZH2, enhancer of zeste 2 polycomb repressive complex 2 subunit;

CDKN1B, cyclin dependent kinase inhibitor 1B;

CDKN2A, cyclin dependent kinase inhibitor 2A;

KLF7, KLF transcription factor 7;

STAT3, signal transducer and activator of transcription 3;

CHEK1, checkpoint kinase 1.

## References

[S1] Karagkouni D, Paraskevopoulou MD, Tastsoglou S, Skoufos G, Karavangeli A, Pierros V, Zacharopoulou E, Hatzigeorgiou AG. DIANA-LncBase v3: indexing experimentally supported miRNA targets on non-coding transcripts. *Nucleic Acids Res.* 2020;48(D1):D101-D110.
