# Supplementary material for: Long Intergenic Non-Coding RNAs of Human Chromosome 18: Focus on Cancers
Source: MDPI journal article supplement (doi:10.3390/biomedicines12030544), 2024-02-28
Supplement: s1 [file s1]

Table S7. A list of GeneHancer\* IDs for analysis of transcriptional regulators of linc-genes of human chromosome 18

| Genes            | GeneHancer ID | Region** | GH-score*** | Total number of transcriptional regulators |
|------------------|---------------|----------|-------------|--------------------------------------------|
| <i>LINC00470</i> | GH18J001407   | P, E     | 1.3         | 73                                         |
| <i>LINC00526</i> | GH18J005625   | P, E     | 2.1         | 81                                         |
| <i>LINC00667</i> | GH18J005293   | P, E     | 2.5         | 210                                        |
| <i>LINC00907</i> | GH18J042740   | E        | 1.2         | 20                                         |
| <i>LINC01255</i> | GH18J011497   | E        | 1.0         | 105                                        |
| <i>LINC1387</i>  | GH18J006557   | E        | 1.2         | 14                                         |
| <i>LINC01415</i> | GH18J055581   | P, E     | 2.3         | 182                                        |
| <i>LINC01416</i> | GH18J055892   | P, E     | 1.1         | 31                                         |
| <i>LINC01478</i> | GH18J044579   | P, E     | 1.1         | 9                                          |
| <i>LINC01630</i> | GH18J050877   | P, E     | 2.0         | 164                                        |
| <i>LINC01882</i> | GH18J012878   | P, E     | 2.1         | 203                                        |
| <i>LINC01894</i> | GH18J024983   | P, E     | 1.3         | 8                                          |
| <i>LINC01895</i> | GH18J003383   | E        | 1.4         | 61                                         |
| <i>LINC01900</i> | GH18J021980   | P, E     | 1.4         | 74                                         |
| <i>LINC01901</i> | GH18J039840   | P, E     | 1.4         | 47                                         |
| <i>LINC01902</i> | GH18J039840   | P, E     | 1.4         | 47                                         |
| <i>LINC01909</i> | GH18J070331   | P, E     | 1.9         | 138                                        |
| <i>LINC01910</i> | GH18J070375   | P, E     | 1.9         | 144                                        |
| <i>LINC01915</i> | GH18J024655   | P, E     | 1.3         | 9                                          |
| <i>LINC01926</i> | GH18J058804   | E        | 1.6         | 20                                         |
| <i>LINC01929</i> | GH18J055581   | P, E     | 2.3         | 182                                        |
| <i>LINC02565</i> | GH18J057426   | P, E     | 2.5         | 146                                        |
| <i>LINC02837</i> | GH18J049500   | P, E     | 1.2         | 13                                         |
| <i>LINC02856</i> | GH18J009641   | E        | 1.6         | 43                                         |
| <i>LINC02864</i> | GH18J073259   | P, E     | 1.3         | 45                                         |
| <i>LINC02958</i> | GH18J023964   | E        | 1.1         | 52                                         |
| <i>LINC02979</i> | GH18J012878   | P, E     | 2.1         | 203                                        |
| <i>LINC03035</i> | GH18J055096   | E        | 1.0         | 42                                         |
| <i>LINC03110</i> | GH18J058667   | P, E     | 2           | 143                                        |

\* GeneHancer (GH) Regulatory Elements database [S1] was used to search transcriptional regulators of linc-genes encoding lincRNAs of lincRNAs of human chromosome 18.

\*\*P – promoter, E – enhancer.

\*\*\*GH-score cut-off value  $\geq 1$

## References

[S1] Fishilevich S, Nudel R, Rappaport N, Hadar R, Plaschkes I, Iny Stein T, Rosen N, Kohn A, Twik M, Safran M, Lancet D, Cohen D. GeneHancer: genome-wide integration of enhancers and target genes in GeneCards. Database (Oxford). 2017, 2017:bax028. doi: 10.1093/database/bax028.
