# Supplementary material for: Long Intergenic Non-Coding RNAs of Human Chromosome 18: Focus on Cancers
Source: MDPI journal article supplement (doi:10.3390/biomedicines12030544), 2024-02-28
Supplement: s1 [file s1]

Table S18. Predicted interactors (microRNAs and RNA-binding proteins) based on the nucleotide sequences of lincRNAs' open reading frames, encoding small proteins

| Genes            | SmProt ID (SPROHSA...) | Length, a.a.* | Peptide Atlas | microRNAs**                                                                  | RNA-binding proteins***                                                                                                                                                                                |
|------------------|------------------------|---------------|---------------|------------------------------------------------------------------------------|--------------------------------------------------------------------------------------------------------------------------------------------------------------------------------------------------------|
| <i>LINC00526</i> | 171627                 | 16            | n/d           | no                                                                           | NUPL2, <b>PABPN1</b> , RBM45, <b>SRSF10</b> , <b>TRA2A</b>                                                                                                                                             |
|                  | 351374                 | 19            | n/d           | no                                                                           | <b>MBNL1</b> , PPRC1, RBFOX1, <b>RBM4</b> , RBM4B                                                                                                                                                      |
| <i>LINC00667</i> | 381877                 | 22            | n/d           | no                                                                           | PABPC1, SART3                                                                                                                                                                                          |
|                  | 166854                 | 23            | n/d           | no                                                                           | FUBP3, RBM15B, RBM41                                                                                                                                                                                   |
|                  | 150256                 | 29            | n/d           | no                                                                           | PTB3                                                                                                                                                                                                   |
|                  | 46960                  | 33            | n/d           | no                                                                           | RBM4B, SAMD4A                                                                                                                                                                                          |
|                  | 300118                 | 39            | n/d           | <b>miR-526b</b> , <b>miR-1827</b> , miR-9851                                 | <b>CNOT4</b> , <b>HNRNPA1</b> , <b>HNRNPL</b> , <b>HNRNPM</b> , <b>HNRPLL</b> , <b>IGF2BP2</b> , <b>IGF2BP3</b> , KHDRBS2, NUPL2, PABPC1, PABPC3, PABPC4, PABPC5, PABPN1L, SART3, <b>SRSF10</b> , YBX2 |
|                  | 168229                 | 40            | n/d           | no                                                                           | RBM4B, SAMD4A                                                                                                                                                                                          |
|                  | 166850                 | 45            | n/d           | no                                                                           | NUPL2, PABC1, PABC3, PABC4, SART3                                                                                                                                                                      |
|                  | 244128                 | 46            | n/d           | miR-4700, miR-548ad, miR-8089, miR-4667                                      | RBM15B, RBM41                                                                                                                                                                                          |
|                  | 166853                 | 50            | n/d           | miR-548z, miR-548h, <b>miR-548d</b> , miR-548bb, miR-548ac                   | <b>RBM5</b>                                                                                                                                                                                            |
|                  | 228790                 | 60            | n/d           | miR-568                                                                      | NUPL2, PABPC1, PABPC3, PABPC4, SART3                                                                                                                                                                   |
|                  | 271103                 | 67            | n/d           | no                                                                           | <b>EIF4G2</b> , FUS, HNRNPH2, <b>MBNL1</b> , <b>PCBP1</b> , <b>PCBP2</b> , PPRC1, RBM22, <b>RBM4</b> , RBM45, SAMD4A, SRSF9, SRSF8, ZC3H10                                                             |
|                  |                        |               |               |                                                                              |                                                                                                                                                                                                        |
| <i>LINC00668</i> | 94911                  | 33            | n/d           | no                                                                           | SAMD4A, <b>SRSF2</b> , SRSF8                                                                                                                                                                           |
|                  | 74203                  | 38            | n/d           | no                                                                           | SAMD4A, SRSF2, SRSF8                                                                                                                                                                                   |
|                  | 226469                 | 66            | n/d           | <b>miR-6836</b> , miR-5006, miR-4755, miR-4446, miR-7110, miR-6829, miR-6791 | NUPL2, <b>SRSF10</b> , <b>SRSF2</b>                                                                                                                                                                    |
|                  | 226470                 | 70            | n/d           | <b>miR-6836</b> , miR-6829, miR-6791                                         | SNRPA, <b>SRSF2</b> , SRSF8                                                                                                                                                                            |
|                  | 226471                 | 86            | n/d           | <b>miR-6836</b> , miR-6829, miR-6791                                         | <b>HNRNPU</b> , SAMD4A, SNRPA, <b>SRSF2</b> , SRSF8                                                                                                                                                    |
| <i>LINC01882</i> | 392610                 | 23            | n/d           | no                                                                           | BRUNOL4, BRUNOL5, <b>RBM38</b>                                                                                                                                                                         |
|                  | 138350                 | 28            | n/d           | no                                                                           | SRSF9, YBX2                                                                                                                                                                                            |
| <i>LINC01895</i> | 9535                   | 8             | n/d           | no                                                                           | ENOX1, SRSF10                                                                                                                                                                                          |
|                  | 283247                 | 19            | n/d           | no                                                                           | <b>RBM24</b>                                                                                                                                                                                           |
|                  | 250413                 | 29            | n/d           | no                                                                           | <b>CNOT4</b>                                                                                                                                                                                           |
|                  | 199922                 | 41            | n/d           | <b>miR-671</b> , miR-2276                                                    | <b>CNOT4</b> , <b>FXR1</b> , <b>LIN28A</b> , RBM22, <b>RBM25</b> , SNRPA, <b>SRSF10</b> , SRSF2                                                                                                        |
|                  | 206729                 | 53            | n/d           | no                                                                           | NUPL2                                                                                                                                                                                                  |
| <i>LINC02864</i> | 297396                 | 34            | n/d           | no                                                                           | PTB3, <b>PTBP3</b>                                                                                                                                                                                     |
|                  | 194114                 | 46            | n/d           | no                                                                           | BRUNOL4, HNRNPF, SNRPA, <b>TRA2A</b>                                                                                                                                                                   |
|                  | 297394                 | 55            | n/d           | miR-6817, miR-4769                                                           | <b>HNRNPH1</b> , <b>LIN28</b> , PABPN1, <b>SRSF2</b> , <b>TRA2A</b>                                                                                                                                    |

\*amino acid residues;

\*\*predicted using the miRDB portal [S1] (<https://mirdb.org>), target score cut-off  $\geq 75$ ;

\*\*\*predicted using the RBPmap portal [S2] (<http://rbpmap.technion.ac.il>), p-value  $< 0.001$ ;

n/d – no data.

Cancer-associated microRNAs and RBPs are highlighted with bold font.

Literature evidence of microRNAs and RNA-binding proteins (RBPs) associations with cancers was explored using MalaCards server: the human disease database [S3] (<http://www.malacards.org/>).

Cancer associations were selected by MalaCards InFormaTion Scores (MIFTS)  $> 70$

## References

- [S1] Chen Y, Wang X. miRDB: an online database for prediction of functional microRNA targets. *Nucleic Acids Res.* 2020;48(D1):D127-D131.
- [S2] Paz I, Argoetti A, Cohen N, Even N, Mandel-Gutfreund Y. RBPmap: A Tool for Mapping and Predicting the Binding Sites of RNA-Binding Proteins Considering the Motif Environment. *Methods Mol Biol.* 2022;2404:53-65.
