# Supplementary material for: Long Intergenic Non-Coding RNAs of Human Chromosome 18: Focus on Cancers
Source: Biomedicines. 2024 Feb 28;12(3):544. doi: 10.3390/biomedicines12030544 (PMC10968066; doi:10.3390/biomedicines12030544)
Supplement: Supplementary file 1 [file biomedicines-12-00544-s001.zip]

Archive with 31 entries (31 files):
- Figure_S1_Ershov.pdf
- Figure_S2_Ershov.pdf
- Figure_S3_Ershov.pdf
- Figure_S4_Ershov.pdf
- Figure_S5_Ershov.pdf
- Figure_S6_Ershov.pdf
- Figure_S7_Ershov.pdf
- Table_S10_Ershov.xlsx
- Table_S11_Ershov.pdf
- Table_S12_Ershov.pdf
- Table_S13_Ershov.xlsx
- Table_S14_Ershov.xlsx
- Table_S15_Ershov.pdf
- Table_S16_Ershov.xlsx
- Table_S17_Ershov.pdf
- Table_S18_Ershov.pdf
- Table_S19_Ershov.xlsx
- Table_S1_Ershov.pdf
- Table_S20_Ershov.pdf
- Table_S21_Ershov.pdf
- Table_S22_Ershov.pdf
- Table_S23_Ershov.xlsx
- Table_S24_Ershov.pdf
- Table_S2_Ershov.pdf
- Table_S3_Ershov.pdf
- Table_S4_Ershov.xlsx
- Table_S5_Ershov.pdf
- Table_S6_Ershov.pdf
- Table_S7_Ershov.pdf
- Table_S8_Ershov.xlsx
- Table_S9_Ershov.pdf
