# Supplementary material for: Long Intergenic Non-Coding RNAs of Human Chromosome 18: Focus on Cancers
Source: Biomedicines. 2024 Feb 28;12(3):544. doi: 10.3390/biomedicines12030544 (PMC10968066; doi:10.3390/biomedicines12030544)
Supplement: Supplementary file 1 [file biomedicines-12-00544-s001.zip › Table_S4_Ershov.xlsx]

## Sheet: co-expressed genes
Table S4. A list #1 of top-100 co-expressed genes (for DE linc-genes in cancers)
LINC00470	Testis	TGCT	LINC00305	Testis	TGCT	LINC00526	Thym_normal	Thym_tumor	LINC00667	Thym_normal	Thym_tumor	LINC00667	Uterus	UCEC_normal	UCEC	LINC00668	Testis	TGCT	LINC01478	Testis	TGCT	LINC01539	TGCT	Testis
	EID3	no		no	no		RAB4B	BRD2		DACH1	BRD4		no	RBSN	no		LINC01015	no		DNAJC5B	no		RP1-232N11.2	CEP112
	IFT88						TIGAR	BRPF1		AP000892.6	RAB6A			LIX1L			LINC00661			ADAM29			RP11-552D8.1	CCIN
	CLEC9A						RNF44	LINC01560		RP11-488C13.7	MAPK1IP1L			ARL2BP			AC016757.3			IPO5			SPATC1	BAG5
	IQCK						RPL23A	SELENOF		GJA4	ZNF134			DSE			CTC-523E23.6			KLHL10			GTSF1L	ADAM29
	CNTRL						ARL8B	WBP4		LINC00705	YTHDC1			ANKRD29			RNF17			SPATA6			TMEM95	SPATA6
	SPATA22						RP11-791M20.1	AC007383.3		RPL7P17	MBD1			KDELC2			LINC00837			AKAP3			UBL4B	ADTRP
	RANBP1						LINC00636	EIF1B		RP11-927P21.2	EPG5			DTWD1			RP11-760D2.11			CAPZA3			FAM209A	C9orf131
	TEX9						CHIAP1	C1orf174		OTUD1	SPTY2D1			RAB30			LINC00930			IGSF11-AS1			XKR3	IGSF11-AS1
	DDX25						ZNF708	OARD1		PKP2	NUMB			RNF185			FKBP6			LINC01539			IZUMO4	TMCO5A
	PHTF1						RP11-15J22.8	HDHD2		SLC45A4	TNPO2			DPYD			GOLGA2P5			UBQLN3			RP11-778H2.1	ZBTB20
	STRBP						MYADML2	RHOA		SNX18P14	DIDO1			MCM6			ANKRD30BL			BOD1L2			RP11-436I24.1	ADAD1
	MEMO1						DNM3-IT1	RDH14		MTND2P28	ZFR			CALCOCO2			TCAM1P			CCIN			LINC01471	C6orf10
	DPY19L2P1						AC108868.6	AKIRIN2		AC096670.3	C11orf58			SNX3			TRIM41			C12orf50			RP11-407A16.3	KLHL10
	TCFL5						RMND5A	USP10		SCFD2	ALS2			PDCD7			MTFR2			TMCO5A			ADAM6	HEATR9
	ZWILCH						PCAT1	POLR2C		RP3-522J7.7	AKAP8			EIF4E3			CCDC108			C7orf31			RP11-91H12.3	DAB1-AS1
	CCDC158						SERPINB11	RAB28		MT1L	CCNT1			MAP3K3			AK9			ACSBG2			AC007563.1	AKAP3
	DNAJC5G						TLL2	WDR82		RP11-430C7.4	ZNF136			PEAR1			RP3-468B3.2			INPP4B			RP11-402G3.5	MTFR1
	STK33						MFSD3	ANAPC10		SMARCE1P1	GMFB			ZBTB4			TULP3P1			HK1			TSSK1B	RP11-73G16.1
	TEX30						HCG4P5	ZNF212		PHBP19	KANSL3			ANO6			HORMAD2			ZDHHC3			TNP2	SSMEM1
	EXOSC9						IL32	DCP1B		MAP9	FUBP3			WASF2			PRC1			NT5C1B			LINC00943	CCDC126
	FAM216A						RP11-77P6.2	TGDS		MAF1	TNKS2			SEPT7			IQCC			GSG1			RIMBP3	DDI1
	CEP63						NUCB2	SNIP1		NPHP3	ICE1			VAMP3			AC005082.12			CCSER2			RP11-102C16.3	NT5C1B
							SERPINB12	FBXL5		CICP17	BOD1L1			NHEJ1			NME9			VWA3B			RP11-1137G4.3	KIF2B
							RP11-334C17.6	TMEM18		PAX3	ATXN7L3B			MSC-AS1			ATP8B3			PGK2			ACTL9	DNAJC18
							B3GAT2	STK24		MT1A	BBS10			ARHGEF6			SYNGR4			MTFR1			RP11-805I24.1	PGK2
							SPATA2	MPPE1		FAM69A	ZBTB34			CLIC2			TSPEAR			ODF2			H1FNT	C6orf201
							RP1-71H19.2	WDR48		RP5-916O11.3	ZKSCAN3			RHOT1			TOE1			PRSS54			RP11-423H2.5	CCDC89
							FGF23	KATNA1		RP11-95H3.1	MGA			CNPY4			ATP8B5P			ODF1			CTD-2296D1.5	RP11-1080G15.1
							SERTAD2	DET1		RP11-554A11.9	TMEM248			FAM171B			DNM1P46			BCL2L14			SPERT	PP2D1
							ST3GAL6	C6orf62		RAB5C	RANBP2			ITSN1			C14orf79			BAG5			C20orf141	ODF2
							RP11-348F1.2	FOCAD		RP11-54O7.17	TBCEL			SEPT8			SYCE2			CSNK1G1			PRM3	BOD1L2
							RNMTL1	POLDIP3		KLK10	DNAJC14			RBMS3			TEX14			ADTRP			LINC01350	TMF1
							KRT1	ZNF407		STPG1	ZNF2			PIGCP1			NEU3			SAMD4A			TEX29	HRASLS5
							ASB8	RRAGA		RP11-403B2.5	CCNY			MAMDC2			DMRTB1			TMCO2			C17orf105	C7orf31
							RP5-1025A1.3	ZKSCAN4		LA16c-329F2.1	ZNF549			FEZ2			RFX4			FAM134B			LINC01430	PMFBP1
							RAET1K	ATP9B		MASP2	GANAB			MARCH8			LINC00552			CST13P			C10orf62	TUSC7
							DDX11L10	ANKRD11		SPAG11B	ATE1			ZNF521			DPY19L2P1			LINC00238			RP11-1136G4.1	ZDHHC3
							MTRF1	USP11		WFDC1	DPP8			BHLHB9			ELFN2			CCNY			IQCF2	RNF38
							RP11-265E18.1	LINC00909		FCGR2B	TFCP2			RP11-358D17.2			LINC00654			DDI1			CCDC70	NDRG3
							ESM1	CFAP20		TOLLIP-AS1	PRR12			MAN1A1			EXD1			CRISP2			CSMD2-AS1	LARGE-AS1
							RP11-74E22.6	CWC22		RP11-359P5.1	WAC			CNRIP1						RP11-1080G15.1			C1orf185	GALNTL5
							RP11-314A15.2	SNRNP27		RP11-121A14.2	AKAP10			MTFMT						HRASLS5			TEX35	BCL2L14
							TOMM40	DDX19A		EPB41L2	UBR2			PHF19						TCP11			ACTL7A	SOX30
							RP11-536L3.4	C1orf52		LDHA	ZNF384			ASB8						FAM46C			RP11-420L9.4	LINC00635
							ADTRP	CAPN7		RP5-1009E24.8	CHD2			COPS4						DNAJC18			RP11-322N21.2	RP11-863K10.2
							SEPSECS	PDCD7		ACOX2	MAML1			FAM102B						C2orf88			LINC00901	INPP4B
							ALG1L9P	DYNC1I2		PROSER2	UTP14C			RPS6KC1						ZBTB20			PRM1	VWA3B
							CWC27	RAF1		CYP2E1	SENP6			SPECC1L						ASB17			IQCF4	ASB17
							CTD-2616J11.14	INIP		RP4-784A16.5	ZMYM1			IQSEC1						FEM1B			CYLC2	TCP11
							RP11-1046B16.3	AC004987.9		IGHGP	ZNF585B			PRICKLE1						LINC01304			RP11-358H18.2	CFAP36
							MYOM2	MED4		PLOD1	PDCL			FER						KIF2B			LINC00521	SOX6
							APIP	AKAP17A		FLJ46066	ZMYM4			ZNF34						BRAP			CTC-441N14.4	GSG1
							RP11-550F7.1	CCNI		RCN3	LSM14A			RNF38						PMFBP1			ACTRT2	RPP38
							RAD17	RP11-932O9.7		RP11-144L1.8	SMG1			TMEM126B						ACTL7A			TEX38	UBQLN3
							MITD1	WIPI2		LA16c-380H5.5	ZNF17			LPCAT1						KNSTRN			ADIG	ERICH3
							ZMAT3	ESCO1		ZFYVE28	ATAD1			CD99L2						LINC00635			ODF1	LINC01304
							SPCS2	ILF3		LINC00621	DOPEY1			GAB1						CEP112			AC005324.7	TTC23L
							DGCR11	ATXN7L3B		VPS18	ZNF271P			SLC16A14						CEP170P1			AC097495.3	CCDC91
							SETDB2	PPIL4		EN1	ZNF543			STAT5B						SUN3			CAPZA3	FAM92A1
							DESI2	BBS9		WNK4	ANKRD40			NEDD4						C6orf201			TSGA13	C1orf185
							COX17	TERF2		RP11-64D24.4	SPTLC1			TOR1AIP1						RGS22			RP11-132M7.3	FEM1B
							RP11-771F20.1	RP11-46C24.7		SNORA11	WDR47			GIMAP2						ZFAND4			RP11-526P6.1	PPP1R7
							CTD-2561B21.3	CSNK2A2		RP5-1022P6.7	ZMYM3			RECK						SRPK2			RP1-139D8.6	KCNU1
							PKMYT1	IST1		FAM205BP	C16orf72			FBXO30						UBE2U			RP11-846C15.2	KLF5
							RP11-452N17.1	MTERF4		ALG3P1	SPEN			PCYOX1						TSSK1B			AL450226.2	TTLL5
							FAM89B	RP11-87H9.2		MTND2P5	SRRM1			TMEM43						GTSF1L			PRM2	RNF148
							AC006386.1	UBAP1		AC006042.6	KIAA0355			MID2						DAB1-AS1			RP11-958J22.3	TSSK2
							MED8	SLC35A1		CTA-722E9.1	BLOC1S6			USHBP1						RP11-664D1.1			RP11-433J20.2	CCDC113
							ANKMY1	NUP54		MAGEE2	RNF111			SPIRE1						ABHD2			BPIFA3	ICA1
							PSMB6	TAF7		RP1-40G4P.1	ZNF879			SYN2						SOX6			DNAJB8	CDKN3
							CIB4	FOPNL		CAPN3	PNPLA8			OLFML3						MFF			LINC01095	PRSS54
							PRKG2	PNRC2		CA10	MAU2			STK3						TFAM			HMGB4	EPHA6
							FBXO45	SLC4A1AP		PRH1-PRR4	TFAM			MAGI2-AS3						GALNTL5			WBSCR28	GK2
							AMZ2	SPAG16		CLCA4	GORASP2			HERC1						RP3-325F22.3			RP5-991C6.4	LACE1
							RP11-177C12.4	HNRNPDL		ATP6V0E1	THAP5			HERC5						COIL			RP11-356K22.1	MAATS1
							HLA-DRB1	MBTPS1		BTBD16	ZSCAN30			pk						TMF1			RP11-39M21.1	FER1L6
							GCNT4	ZC3H7A		RPLP1P13	MIER3			RAB3GAP1						PDE1A			RP11-357K6.2	PSD3
							EFCAB1	CRBN		RP11-77K12.7	KMT2D			THSD7A						PPP1R7			AGGF1P9	C2orf88
							RPL32P33	DDX1		KC6	VPS4B			HSPA12B						FBXO39			RP1-116K23.1	RP3-325F22.3
							KLK8	C9orf64		AKR1C2	GANC			PPT1						ACTRT3			RP11-571O6.1	PIAS2
							MTF2	ZNF17		RP11-155G14.5	NEK9			RP11-875O11.1						EPHA6			AGGF1P7	BRAP
							HSPE1-MOB4	EIF4H		TPO	BIRC6			TSPAN9						TTC23L			RP4-726F1.1	ACSBG2
							RBM15B	PPP1R8		RP11-164P12.3	YLPM1			SEC22C						DCC			RP11-307O10.1	CEP41
							KRT18P61	CAT		PDE1C	REV1			IL17RD						PSMF1			RP11-282C5.1	ACTRT3
							RP11-526D8.7	WTAP		ABCA1	AKT2			ENDOD1						SIRPD			RP3-403L10.3	ABHD2
							PCGF7P	EIF3J-AS1		MRPS25	CWC22			RAB11FIP5						RNF138			RNU1-30P	C3orf30
							LA16c-431H6.7	GPALPP1		RP11-362F19.1	PURB			CALD1						CEP85L			OR51H1	EFCAB11
							RP11-106M3.2	ZNF319		LHX5	UBR1			SLC38A2						ADAD1			RP11-285M22.3	NOL4
							HIST2H3PS2	GABPB1-AS1		C17orf51	FAM168B			CEP68						CCDC126			OR9G4	SEL1L2
							ATP2A1	RP11-412D9.4		CICP14	R3HDM2			DENND2C						COPS5			RP11-28O3.1	SPAM1
							ZNF880	SIAH1		DLX6	TRIM39			RNASEL						TPD52L3			OR9G2P	HK1
							NCAPG	GNB1		RASSF4	RALGAPB			KIRREL						LPP			RP11-133L19.1	ZFAND4
							AC007253.1	GOLGA7		CSPG4	PTPRA			BRMS1L						TUSC7			RP11-468I15.1	SRPK2
							SETP14	C11orf57		SNORA23	UPF2			RP11-153I24.4						SPATA18			CTD-2254N19.1	C11orf65
							MFI2	PUS10		RP1-63M2.7	BBS4			ABCC9						C16orf82			RP11-102N11.1	TSSK1B
							RP11-84C13.2	RNF214		RTN2	POM121			JAM2						ATAD1			AC008691.1	CAPZA3
							CTD-3195I5.4	PRKRIR		XYLT2	ITCH			TGFBR3						FBXL13			RP11-748L13.2	DIAPH3
							TMCO1	ZNF776		SH3BGR	NPC1			SLC9B2						FAM81B			RP3-400B16.3	DNAJC5B
							AP001610.5	GPBP1L1		RP11-20G13.3	SLK			CD302						SOX30			RP11-272D12.1	C12orf50
							ZNF815P	RXRB		ZNF566	MLLT10			RP11-63A1.4						RNF38			RP11-588P7.1	IPO5

## Sheet: functional enricment
linc-gene	Condition	Co-expressed genes, n	Overlap, %	Term index	Term name	FDR
LINC00526	Thymoma_tumor	100	10	GO:0010608	posttranscriptional regulation of gene expression	0.043
			10	GO:0006397	mRNA processing	0.043
			9	R-HSA-72203	processing of capped intron-containing pre-mRNA	0.0038
LINC00667	Thymoma_tumor	100	6	GO:0071166	ribonucleoprotein complex localization	0.015
			19	R-HSA-74160	gene expression (transcription)	0.024
LINC00668	Testis tissue	40	13	GO:0051321	meiotic cell cycle	0.0056
			10	GO:0000793	condensed chromosome	0.017
LINC01478	Testis tissue	100	9	GO:0022412	cellular process involved in reproduction in multicellular organism	0.0027
			12	GO:0031514	motile cilium	<0.001
LINC01539	TGCT_tumor	100	6	GO:0022412	cellular process involved in reproduction in multicellular organism	<0.001
			3	GO:0044815	DNA packaging complex	0.01
			3	GO:0031514	motile cilium	0.04
	Testis tissue	100	11	GO:0022412	cellular process involved in reproduction in multicellular organism	<0.001
			11	GO:0031514	motile cilium	<0.001
Over-representation analysis (ORA) of a list of gene names was performed using the WebGestalt server (WEB-based Gene SeT AnaLysis Toolkit) with gene ontology terms (biological process noRedundant, molecular function noRedundant and cellular component noRedundant), pathway terms (KEGG and Reactome databases) with the following settings: reference gene list – ‘genome protein-coding’; minimum number…
