# Supplementary material for: Long Intergenic Non-Coding RNAs of Human Chromosome 18: Focus on Cancers
Source: Biomedicines. 2024 Feb 28;12(3):544. doi: 10.3390/biomedicines12030544 (PMC10968066; doi:10.3390/biomedicines12030544)
Supplement: Supplementary file 1 [file biomedicines-12-00544-s001.zip › Table_S8_Ershov.xlsx]

## Sheet: A list of TFs
Table S8. Transcriptional factors (TFs) predicted as regulators of linc-genes expression using the GeneHancer Regulatory Elements database in the frame of the GeneCards portal
LINC00470	LINC00526	LINC00667	LINC00907	LINC01255	LINC01387	LINC01415	LINC01416	LINC01478	LINC01630	LINC01882	LINC01894	LINC01895	LINC01900	LINC01901	LINC01902	LINC01909	LINC01910	LINC01915	LINC01926	LINC01929	LINC02565	LINC02837	LINC02856	LINC02864	LINC02958	LINC02979	LINC03035	LINC03110
MNT	ATF2	HCFC1	POLR2A	JUND	ZIC2	POLR2A	NCOR1	CTCF	POLR2A	HCFC1	SP1	YY1	ATF3	ZIC2	ZIC2	KLF6	DPF2	SPI1	ZNF610	POLR2A	KLF6	ZIC2	JUND	CEBPG	HCFC1	HCFC1	ZNF580	KLF6
TBP	ZNF580	POLR2A	YY1	BCL11A	EZH2	ZNF580	NONO	ZNF592	SP1	KLF6	ZNF366	CEBPB	YY1	ZNF600	ZNF600	DPF2	NCOR1	BHLHE40	FEZF1	ZNF580	CTCF	ZNF341	TCF12	CEBPB	TRIM22	KLF6	KLF17	POLR2A
ARNT	KLF17	SP1	ETS1	BRCA1	TEAD4	KLF17	MNT	ZNF654	KLF17	POLR2A	POU5F1	ZNF592	CEBPA	CTCF	CTCF	JUND	ZNF184	ZNF398	IRF4	KLF17	ZIC2	FEZF1	ZNF217	ZNF592	CTCF	POLR2A	CTCF	SP1
SMAD5	POLR2A	KLF17	FEZF1	CEBPA	MEIS2	NCOR1	TAF9B	RAD21	ZNF600	ZNF580	RAD21	MNT	KDM6A	ZNF654	ZNF654	ATF3	YY1	ZNF384	ZNF843	NCOR1	ZNF600	SIN3A	EP300	MNT	NR2C1	ZNF580	REST	JUND
TAF9B	ZIC2	ZNF600	FOXA2	HIC1	GATA2	ZNF184	SUPT5H	SMC3	DNMT3B	KLF17	NANOG	ZEB1	PRDM1	ZNF341	ZNF341	DNMT3B	REST	PKNOX1	PRDM6	ZNF184	YY1	PRDM6	CTBP1	SMAD5	IRF4	KLF17	CEBPB	ATF3
NKRF	ZNF600	YY1	RXRA	DEK	TEAD2	ZNF600	EP400	ZNF664	CEBPG	NCOR1	ZNF512	KLF7	SAP130	KLF7	KLF7	YY1	CEBPA	EGR2	BATF	ZNF600	REST	ATF4	CUX1	TAF9B	GABPA	NCOR1	ZNF654	ZNF600
KDM4B	ZBTB10	CEBPA	HNF4A	FOXA1	ZSCAN4	YY1	FOXK2	ZNF660	REST	CTCF	FOS	IRF2	FOXA2	BHLHE40	BHLHE40	CEBPA	NFIC	FOS	NRF1	YY1	HIC1	CTBP1	MAFF	NKRF	SMC3	CTCF	RAD21	YY1
ELF1	ZNF341	ZBTB10	TAF1	CEBPB	EGR2	ZBTB10	NRF1	TRIM22	ZBTB10	ZIC2	CTCF	EP300	HOMEZ	FEZF1	FEZF1	FOXA1	CEBPB	CEBPB	JUNB	ZBTB10	MBD2	PKNOX1	RFX5	ELF1	RXRA	ZIC2	RFX5	CEBPG
NBN	ZSCAN16	NFIC	FOXA1	MAX	CBFA2T2	NFIC	EGR1	ZNF143	ZNF207	ZNF600		FEZF1	MIER3	YY1	YY1	CEBPB	SSRP1	ZFHX2	PRDM4	NFIC	CEBPB	POLR2A	ZNF316	ZNF316	EBF1	ZNF600	SMC3	CEBPA
SKIL	ZEB1	ZNF207	REST	EP300	CHD2	CTCF	TAF7		RCOR1	BCL11A		FOXA2	THAP11	SMAD4	SMAD4	CHD2	ARNT		SP7	CTCF	CHD2	MYNN	RARA	NBN	YY1	BCL11A	RXRA	HIC1
NCOA2	ZNF223	MAZ	RAD21	CHD4	ZBTB6	ZNF592	POLR2A		CEBPB	YY1		RFX5	RXRA	DMAP1	DMAP1	ZMYM3	CHD4		POLR2A	ZNF592	UBTF	EZH2	TEAD3	SUPT5H	CBX1	YY1	YY1	ZBTB10
NUFIP1	KLF7	MBD2	GLIS1	KDM6A	CBFA2T3	MNT	ATF4		CTCF	HIC1		ZNF316	SMAD4	BCL6	BCL6	SSRP1	KDM6A		ZSCAN26	MNT	ZNF341	ZNF121	MAFK	HDAC2	ZNF146	HIC1	ZBTB5	ZNF207
ATF1	KLF9	ZNF592	ZNF18	SAP130	ZFHX2	ZNF341	RLF		MNT	NFIC		RXRA	ZBTB33	RAD21	RAD21	KMT2B	SAP130		ZBTB8A	ZNF341	IRF3	KDM1A	MCM7	POLR2A	PKNOX1	NFIC	TCF7L2	ZNF592
SUPT5H	SP2	CHD1	SP1	CUX1	ZNF335	TBP	HDAC1		SIN3A	ZNF207		TBP	FOSL2	KDM5A	KDM5A	EP300	FOXA2		PKNOX1	TBP	TBP		MAFG	IRF9	EHMT2	ZNF207	USF2	CEBPB
ZZZ3	SIN3A	HES1	GATA2	CTBP1		TCF12	CEBPB		ZNF341	ZNF592		NFE2	RARA	ZBTB48	ZBTB48	CHD4	HOMEZ		ZXDB	TCF12	TCF12		SMARCE1	EP400	BATF	ZNF592	PRDM6	CTCF
ZNF318	RARA	ZMYM3	POU5F1	FOXA2		ZNF639	ARID1B		TBP	RCOR1		USF2	DRAP1	KLF16	KLF16	KDM6A	ZNF511		CREM	ZNF639	ZSCAN16		ZBTB33	FOXK2	ELF1	RCOR1	MAX	CHD2
PRDM10	GLI4	ZNF341	NANOG	HOMEZ		ZSCAN16	SMARCE1		ZNF639	MAZ		ASH2L	TEAD3	ZNF2	ZNF2	KLF11	TARDBP		OSR2	ZSCAN16	MAX		INSM2	SMARCA4	BHLHE40	MAZ	SCRT1	UBTF
EP400	ZSCAN5A	TBP	ATF3	RAD21		ZEB1	GTF2F1		MAX	MBD2		ZFP91	THRB	MXD3	MXD3	SAP130	MIER3		RUNX3	ZEB1	ZEB1		DPF2	MAFG	STAT5A	MBD2	ZNF398	SIN3A
MLLT1	ZNF843	REST	NR2F2	ZFP64		KLF7	TRIM24		ZEB1	CHD2		ZNF843	JUND	TAF1	TAF1	FOXA2	ZSCAN9		ZNF335	KLF7	KMT2B		RFX1	FOXM1	NCOA1	CHD2	HNF4A	REST
THRAP3	ZBTB48	MAX	WT1	MAFF		HCFC1	IKZF1		KLF7	NONO		ZNF217	BCL6	RBPJ	RBPJ	HOMEZ	ZNF316		WT1	HCFC1	POLR2A		TEAD4	RAD51	DIDO1	NONO	MEIS2	KMT2B
FOXK2	ZNF146	IRF2		RFX5		SMAD5	CTBP1		KMT2B	ELK1		JUND	CREM	ZNF48	ZNF48	ZNF511	RXRA			SMAD5	KLF9		SP1	ZNF384	IKZF1	ELK1	SP7	EP300
SMARCA4	KLF16	KDM6A		SMC3		TAF9B	ZNF24		SMAD5	ZNF341		PKNOX1	ZNF205	RFX1	RFX1	RAD21	SMAD4			TAF9B	SAP130		ZNF366	TAF7	HDGF	ZNF341	ZNF366	KLF9
FOXM1	ZNF189	SMAD5		THAP11		KLF9	NFRKB		ELF1	TBP		BATF	FOXP1	ZNF768	ZNF768	MAFF	ZBTB33			KLF9	ZNF610		JUN	ATF4	NR2F1	TBP	TRIM28	SAP130
NRF1	ZNF2	ELF1		ZSCAN9		ZNF610	ATF7		TAF9B	SSRP1		MAFG	KDM1A	SIN3A	SIN3A	MIER3	KAT7			ZNF610	FEZF1		CREB1	NR2F6	JUNB	SSRP1	KLF1	FOXA2
NCOA1	ZFP37	KLF9		STAT3		ETS1	LEF1		KLF9	ZSCAN16		NFE2L2	SOX5	IKZF5	IKZF5	SMC3	TAL1			ETS1	SP2		DACH1	MEIS2	ZBTB40	ZSCAN16	ZSCAN21	SP2
ZC3H8	HNF4A	BHLHE40		EBF1		SP2	GATAD2A		PRDM1	MAX		ZFP37	HHEX	GATA2	GATA2	THAP11	FOSL2			SP2	ZNF511		ZXDB	L3MBTL2	NFRKB	MAX	ZSCAN4	ZFP64
RAD51	REST	PRDM1		SMAD4		MAFF	ZSCAN29		SAP130	KMT2B		HNF4A	RCOR1	KDM3A	KDM3A	ZSCAN9	RARA			MAFF	RAD21		NANOG	HDAC1	GABPB1	KMT2B	EGR2	GABPA
ZNF384	ZNF547	SAP130		TCF7L2		SIN3A	MTA2		ZNF610	MXD4		NR2F1	HNF4A	TRIM28	TRIM28	STAT3	ETV4			SIN3A	SP1		FOS	ATF3	KLF1	MXD4	ZNF629	THAP11
EGR1	TAF1	CTBP1		RARA		IRF4	BRD9		SP2	SMAD5		MAFK	HMG20A	L3MBTL2	L3MBTL2	ZNF316	MYNN			IRF4	MAFF		ZNF629	ATF1	YY2	SMAD5	ZNF776	SMARCA5
CHAMP1	CBLL2	FOXA2		ETV4		ZNF513	NR2F1		ZNF511	ELF1		JUNB	RAD21	PPARG	PPARG	RXRA	DRAP1			ZNF513	SIN3A		POLR2A	GTF2F1	CREB1	ELF1	PATZ1	ZSCAN9
TAF7	PRDM4	SP2		FOSL2		NKRF	MGA		MIER3	KLF9		RBBP5	HMG20B	MNT	MNT	SMAD4	DMAP1			NKRF	MIER3		ATF2	RNF2	KDM1A	KLF9	RFX1	RXRA
SP1	GLIS1	ZNF511		TEAD3		SAFB			NKRF	BHLHE40		NR2F6	RBPJ	MIXL1	MIXL1	ZBTB33	TEAD3			SAFB	RFX5		PRDM10	IKZF1	MNT	BHLHE40	OSR2	EBF1
POLR2A	ZFP69B	ZFP64		THRB		ZNF316			GABPA	ZNF610		REST	ZNF48	XRCC5	XRCC5	NFE2	TBP			ZNF316	ZNF585B		ATF7	ATF2	SPI1	ZNF610	ZNF239	TBP
ZBTB40	ZNF398	SIN3A		MAFK		NBN			SMARCA5	SAP130		PRDM4	FOXA1	PATZ1	PATZ1	FOSL2	JUND			NBN	SMC3		GATAD2B	PKNOX1	FOS	SAP130	PRDM10	SMAD4
CSDE1	ZNF18	RUNX1		BCL6		TARDBP			ZSCAN9	ETS1		TCF7	REST	ZBTB17	ZBTB17	RARA	MAFK			TARDBP	THAP11		BMI1	NFRKB	ZNF687	ETS1	PKNOX1	CBFB
CREM	ZNF837	ZSCAN9		MBD1		SKIL			DDX20	FEZF1		POLR2A	TFAP4	GLIS2	GLIS2	RBM22	BCL6			SKIL	ZSCAN9		RFX3	CREB1	CREM	FEZF1	USF1	TCF7L2
DPF2	SP7	SAFB		CREM		ZBTB33			SKIL	RAD21		MAX	LCORL	SMC3	SMC3	DRAP1	CREM			ZBTB33	STAT3		CHD2	CBX3	MTA2	RAD21	MEF2D	NFE2
L3MBTL2	ZNF701	ZNF316		FOXP1		JUND			DRAP1	SIN3A		MEIS2	MAX	ZNF211	ZNF211	DMAP1	FOXP1			JUND	ZNF316		ZBTB2	POLR2B	IKZF2	SIN3A	SP1	RARA
HDAC1	ZNF366	EBF1		ZNF217		ZSCAN5A			ZFP91	IRF4		SP1	ATF1	KLF8	KLF8	TEAD3	HDAC2			ZSCAN5A	DDX20		EMSY	HMBOX1	CTBP1	IRF4	ZNF335	DRAP1
GABPB1	KLF1	NBN		KDM1A		NUFIP1			ZSCAN5A	SMC3		SP7	RXRB	RFX3	RFX3	TBP	STAT5A			NUFIP1	SMAD4		TEAD1	NR2C1	EED	SMC3	SCRT2	TEAD3
SMARCE1	ZNF785	SMAD4		SOX5		CBX1			BCL6	SMARCA5		L3MBTL2	ELF3	ZNF777	ZNF777	THRB	KDM1A			CBX1	ZBTB33		PRDM1	EMSY	DPF2	SMARCA5	NR2F1	BCL6
GMEB1	L3MBTL2	SKIL		PAX5		ZNF843			MBD1	ZSCAN9		ZNF366	NR2F6	ZBTB11	ZBTB11	MAFK	TBX3			ZNF843	TCF7L2		MTA1	MYC	CBX3	ZSCAN9	WT1	ZNF205
ATF3	KLF10	ZBTB33		HHEX		SUPT5H			CBX1	SIN3B		KLF1	IKZF5	ZGPAT	ZGPAT	BCL6	SMARCA4			SUPT5H	KAT7		WT1	E2F1	RUNX3	SIN3B		MAX
KDM1A	ZSCAN26	KAT7		SMARCE1		ZBTB48			ZNF843	SAFB		SMARCE1	ARID3A	ZBTB26	ZBTB26	MBD1	FOXM1			ZBTB48	TAL1			NR2F1	NBN	SAFB		ZBTB48
GTF2F1	ZNF324	RARA		HMG20A		KLF16			ZNF205	ZNF316		MLLT1	SP1	PRDM1	PRDM1	ATF1	SOX5			KLF16	RARA			MGA	RELB	ZNF316		RAD21
ZNF512	CTCF	ETV4		NR2F1		HDAC2			SUPT5H	EBF1		ZXDB	NFIA	ZNF335	ZNF335	CREM	ZEB2			HDAC2	GABPA				GATAD2B	EBF1		SPI1
ZNF354B	ZSCAN21	RBM22		HBP1		TAF1			ZBTB48	SMAD4		FOS	ARID4B	ERF	ERF	ZNF205	NCOA1			TAF1	DRAP1				ZNF121	SMAD4		TAF1
TRIM24	ZBTB12	GABPA		DPF2		PRDM6			KLF16	SKIL		RAD51	EGR1			FOXP1	GTF2F1			PRDM6	DMAP1				MEF2D	SKIL		PRDM6
ATF2	SP3	DRAP1		RBPJ		ZHX1			TAF1	CBFB		CREM	NFIL3			KDM1A	TCF12			ZHX1	ZFP91				ZBTB11	CBFB		ELF1
PKNOX1	ZBTB8A	DMAP1		ZNF792		ZSCAN23			PKNOX1	TAL1		GFI1B	HNF1A			KAT2B	ZNF384			ZSCAN23	ZNF143				CBFA2T3	TAL1		BHLHE40
NFRKB	ZNF660	MAFK		ATF2		EP400			ZSCAN23	ETV4		SOX6	NR2F1			MAFG	HNF4A			EP400	TEAD3				MLLT1	ETV4		ZNF189
MTA3	PKNOX1	ASH2L		MIER2		MLLT1			EP400	DRAP1		IKZF2	ZNF644			SOX5	HMG20A			MLLT1	MAFK				MYC	DRAP1		MAFG
ATF7	ZSCAN4	BCL6		BHLHE40		MAFK			ZNF24	DMAP1		ATF3	MLX			NFE2L2	EGR1			MAFK	BCL6					DMAP1		SOX5
POLR2B	TBP	CREM		NFE2L2		ZNF24			BHLHE40	ASH2L		EGR1	HLF			SMARCE1	MTA2			ZNF24	CREM					ASH2L		PAX5
NCOR1	ZXDB	ATF1		TFAP4		SCRT1			ZNF189	ZFP91		FOXK2	SP5			ZFP37	RAD21			SCRT1	MBD1					ZFP91		NRF1
BCOR	EGR2	ZNF205		LCORL		FOXK2			SMARCA4	TEAD3		ETV6	NCOR1			NRF1	ZNF792			FOXK2	ZNF205					TEAD3		IKZF1
CC2D1A	ZEB2	SUPT5H		GATA4		ZNF189			ZNF2	ZSCAN5A		EZH2	GATAD2A			HNF4A	ZNF48			ZNF189	ZBTB48					ZSCAN5A		ZFP37
ZNF184	ZNF629	FOXP1		ATF1		SMARCA4			NRF1	BCL6		MEF2D	XRCC5			HMG20A	FOXA1			SMARCA4	CBX8					BCL6		IRF5
MTA2	ZNF692	KLF16		RXRB		FOXM1			IKZF1	CREM		GABPA	TCF7			GATAD1	BHLHE40			FOXM1	PKNOX1					CREM		RB1
HMBOX1	PATZ1	MYRF		NR2F6		ZNF2			ZFP37	CBX1		EMSY	KAT8			HBP1	RFX1			ZNF2	BATF					CBX1		EGR1
ZBTB5	ZNF239	HDAC2		ELF3		CBX2			RB1	ZNF843		MGA	IRF2			HMG20B	TFAP4			CBX2	SCRT1					ZNF843		GATAD1
AFF1	PRDM10	MYC		IKZF5		NRF1			ZNF664	SUPT5H			HNF4G			RBPJ	LCORL			NRF1	MAFG					SUPT5H		ZNF24
NR2C1	ZBTB17	EHMT2		NCOA3		ZC3H8			HDGF	SPI1			GABPA			ZNF792	TEAD4			ZC3H8	SOX5					SPI1		NR2F1
BRD9	GLIS2	BATF		CEBPG		INSM2			GATAD1	GTF2F1			SOX13			ATF2	MAX			INSM2	ZNF2					GTF2F1		HBP1
PHB2	ZBTB6	EP400		ARID3A		SNIP1			MXD3	BCL11B			ETS1			ZNF48	ATF1			SNIP1	NRF1					BCL11B		SIN3B
EMSY	BCL11A	SCRT1		JUN		DIDO1			NR2F1	HDAC2			FOXA3			MIER2	RXRB			DIDO1	ZFP37					HDAC2		ATF4
HDAC2	ZNF501	FOXK2		NFIL3		ZFP37			RBPJ	TAF1			RCOR2			BHLHE40	MEIS2			ZFP37	ZNF384					TAF1		ATF2
MYC	PRDM2	SMARCA4		CREB1		ZNF384			ZNF792	MYC			RERE			REST	NR2F6			ZNF384	HNF4A					MYC		STAT1
MTA1	ZSCAN18	MAFG		ZNF644		HNF4A			ZNF488	PRDM6			NR2F2			TFAP4	ELF3			HNF4A	GATAD1					PRDM6		BACH1
E2F1	KLF8	SOX5		PPARG		BMI1			ZNF48	EP400			ZGPAT			LCORL	IKZF5			BMI1	TAF1					EP400		GLIS1
MIER1	ZBTB20	PAX5		MLX		ZNF664			HNRNPL	SCRT1			PBX2			GATA4	CEBPG			ZNF664	RBPJ					SCRT1		TFAP4
NR2F1	EZH2	NRF1		HLF		EGR1			NFYC	SMARCA4			SKI			MAX	ARID3A			EGR1	ZNF792					SMARCA4		ZFP69B
MGA	ZNF777	ZC3H8		SOX13		CHAMP1			BACH1	FOXM1			TEAD1			ZNF652	SP1			CHAMP1	ZNF48					FOXM1		ZNF398
	ZNF121	RCOR1		ZNF384		REST			PRDM4	NRF1			ERF			RXRB	SP7			REST	CHD1					NRF1		GATA4
	ZBTB11	IKZF1		MIXL1		MTA2			GLIS1	TCF12						NR2F6	HDAC1			MTA2	MIER2					TCF12		BCLAF1
	ZNF23	FOXM1		SP5		TAF7			ZFP69B	IKZF1						ELF3	ZNF580			TAF7	JUNB					IKZF1		ZNF350
	ZNF157	ZFP37		NCOR1		RAD21			ZNF398	ZFP37						IKZF5	NFIA			RAD21	ZSCAN29					ZFP37		RXRB
	ZFHX2	RB1		GATAD2A		SP1			MEIS2	ZNF384						CEBPG	ARID1B			SP1	HDAC2					ZNF384		ZNF217
	ZBTB26	RFX5		FOXK2		ZNF362			ELF3	NFATC1						ARID3A	KLF1			ZNF362	NFYC					NFATC1		ELF3
	ZNF335	HMG20A		FOS		ZNF518A			TCF12	RB1						SP1	ARID4B			ZNF518A	PRDM4					RB1		ZFX
	WT1	EGR1		XRCC5		BHLHE40			ZFX	EGR1						ZNF580	NFIL3			BHLHE40	GLIS1					EGR1		SP7
		HBP1		SMARCC2		PRDM4			SP7	HDGF						NFIA	SMARCE1			PRDM4	ZNF398					HDGF		NR2F6
		TAF7		MTA1		ZBTB40			L3MBTL2	GATAD1						KDM3A	HNF1A			ZBTB40	RXRB					GATAD1		GATA2
		TAF1		ZHX2		GLIS1			HDAC1	ZNF24						JUN	ZNF644			GLIS1	MEIS2					ZNF24		KLF5
		HMG20B		TCF7		ZFP69B			GATA2	MXD3						ARID1B	PPARG			ZFP69B	ZNF133					MXD3		NKRF
		ZNF48		RFX1		TEAD4			GABPB1	NR2F1						ARID4B	MLX			TEAD4	EGR1					NR2F1		ZNF561
		JUNB		KAT8		ZNF398			ZNF366	REST						NFIL3	HLF			ZNF398	ZNF580					REST		ARID4B
		ATF2		IRF2		ZNF18			KLF1	HNRNPH1						HNF1A	ATF3			ZNF18	KDM3A					HNRNPH1		NFIL3
		ZNF3		ESRRA		ZNF143			ARID4B	TAF7						NR2F1	TBL1XR1			ZNF143	GABPB1					TAF7		E2F4
		STAT1		ZBTB26		CREM			ZBTB7A	ZNF792						ZNF644	SMC3			CREM	ZNF366					ZNF792		GMEB1
		NR2F6		ZKSCAN8		MEIS2			KLF10	ZNF48						PPARG	PKNOX1			MEIS2	ZNF202					ZNF48		PPARG
		RLF		REST		ZFX			ZNF324	ZNF362						MLX	MIXL1			ZFX	ARID4B					ZNF362		ARID3A
		BACH1		ETS1		RUNX1			ARID3A	HNRNPL						HLF	DACH1			RUNX1	NFIL3					HNRNPL		HLF
		GLIS1		TFDP1		SP7			ZBTB12	ATF4						ZNF384	SP5			SP7	L3MBTL2					ATF4		ZNF384
		TFAP4		TCF12		ZNF16			ZSCAN21	ATF2						POLR2A	GATAD2A			ZNF16	ZSCAN26					ATF2		ZSCAN21
		ZFP69B		FOXA3		L3MBTL2			SP3	STAT1						PHF21A	FOS			L3MBTL2	MLX					STAT1		PHF21A
		ZNF398		ATF7		HDAC1			ZBTB8A	NR2F6						ZNF24	FOXK2			HDAC1	SOX13					NR2F6		SP3
		ZNF652		RERE		NFRKB			ZNF660	BACH1						MIXL1	KLF16			NFRKB	ZBTB12					BACH1		ZBTB8A
		RXRB		ZBTB25		GABPB1			ZSCAN4	ZBTB40						NCOR1	TGIF2			GABPB1	SP3					ZBTB40		ZNF660
		ZNF217		ZGPAT		ZNF366			SP5	GLIS1						GATAD2A	CBFA2T2			ZNF366	ZBTB8A					GLIS1		SMAD5
		ELF3		SKI		CUX1			ZXDB	TEAD4						FOXK2	TAF1			CUX1	ZNF660					TEAD4		ZXDB
		MEIS2		SIN3A		KLF1			ZNF280D	ZNF398						FOS	TCF7			KLF1	ZSCAN4					ZNF398		TARDBP
		IKZF5		TEAD1		ZNF561			ATF1	ZNF18						TGIF2	ZNF7			ZNF561	SP5					ZNF18		LEF1
		PHF20		PRDM1		ZFP3			EGR2	GATA4						XRCC5	KAT8			ZFP3	ZNF280D					GATA4		EGR2
		CEBPG		ERF		ZNF785			ZEB2	RXRB						NFKBIZ	RNF2			ZNF785	EGR2					RXRB		HNRNPL
		ARID3A				NFATC3			ZNF629	ZNF217						SMARCC2	IRF2			NFATC3	ZEB2					ZNF217		TGIF2
		SP7				GMEB1			TGIF2	MEIS2						TCF7	TRIM24			GMEB1	HNRNPL					MEIS2		ZNF692
		L3MBTL2				KLF10			RAD51	ELF3						KAT8	ELF1			KLF10	TGIF2					ELF3		ZNF687
		HDAC1				ZNF169			ZNF692	IKZF5						IRF2	IKZF1			ZNF169	XRCC5					IKZF5		PATZ1
		ZNF580				YY2			U2AF2	ZFX						ELF1	CTBP1			YY2	ZNF692					ZFX		TCF7
		CEBPB				ZNF324			ZNF776	PHF20						ZBTB26	POLR2A			ZNF324	ZNF776					PHF20		RNF2
		GABPB1				TBL1XR1			ZNF687	KLF1						HNF4G	HNF4G			TBL1XR1	EZH2					KLF1		KAT8
		NKRF				ZBTB12			MTA2	SP1						ZKSCAN8	ZKSCAN8			ZBTB12	PATZ1					SP1		IKZF2
		KLF1				SP3			PATZ1	SP7						SOX13	ZBTB17			SP3	OSR2					SP7		LARP7
		ARID4B				ZBTB8A			CHD2	L3MBTL2						PKNOX1	SOX6			ZBTB8A	KAT8					L3MBTL2		IRF2
		ZNF687				PKNOX1			IKZF2	ZNF548						ETS1	SOX13			PKNOX1	IRF2					ZNF548		PRDM10
		ZBTB7A				ZSCAN4			KAT8	HDAC1						ZHX2	ETS1			ZSCAN4	RNF2					HDAC1		GLIS2
		NFIL3				ZNF660			LARP7	GATA2						CREB1	ZHX2			ZNF660	ZBTB26					GATA2		ZNF626
		E2F4				ARID2			ZBTB33	KDM3A						PHF8	TFDP1			ARID2	HNF4G					KDM3A		SOX13
		GMEB1				ZXDB			CTBP1	GABPB1						EGR1	CHAMP1			ZXDB	PRDM10					GABPB1		EED
		KLF10				ZNF280D			YY1	PKNOX1						BACH1	EP300			ZNF280D	ZBTB17					PKNOX1		TFDP1
		YY2				ATF1			TRIM22	NKRF						FOXA3	MTA3			ATF1	GLIS2					NKRF		TCF12
		CREB1				MAX			PRDM10	POU5F1						ATF7	ATF7			MAX	ZBTB6					POU5F1		ZNF501
		ZNF644				EGR2			ZBTB17	ARID1B						RFXANK	FOXA3			EGR2	TFDP1					ARID1B		DPF2
		TBL1XR1				ZEB2			GLIS2	ZBED1						RCOR2	RFX3			ZEB2	ZNF501					ZBED1		PHF8
		SOX13				GTF2F1			SOX6	ZNF561						RERE	LEF1			GTF2F1	PHF8					ZNF561		U2AF1
		HLF				NANOG			ZNF626	ARID4B						GABPA	RCOR2			NANOG	BACH1					ARID4B		RUNX3
		ATF3				ZNF629			ZNF143	ZFP3						RBFOX2	CC2D1A			ZNF629	PRDM2					ZFP3		RELB
		MBD1				ZNF692			ZBTB6	ZNF687						NR2F2	RERE			ZNF692	TRIM22					ZNF687		ETV6
		ZBTB12				PATZ1			EED	GMEB1						TFE3	RBFOX2			PATZ1	KLF8					GMEB1		FOXA3
		SP3				CHD2			TFDP1	PPARG						ZBTB25	CBFA2T3			CHD2	ZBTB20					PPARG		ZBTB20
		ZBTB8A				OSR2			RAD21	TBL1XR1						ZGPAT	AFF1			OSR2	ZNF777					TBL1XR1		GATAD2B
		MIXL1				CBX8			ZNF501	ZNF324						SKI	TFE3			CBX8	AHR					ZNF324		ZSCAN29
		ZXDB				RNF2			DPF2	ARID3A						TEAD1	ZFHX2			RNF2	ZBTB11					ARID3A		EZH2
		NCOR1				IKZF1			PHF8	ZSCAN21						HDAC2	ZGPAT			IKZF1	RBFOX2					ZSCAN21		AHR
		EGR2				CTBP1			MTA3	KDM1A						SMARCA4	PML			CTBP1	ZBTB25					KDM1A		ZBTB11
		ZEB2				ZNF239			ZSCAN29	SP3						SCRT2	PBX2			ZNF239	ZFHX2					SP3		RBFOX2
		ZFX				MZF1			PRDM2	MNT						ERF	PHB2			MZF1	ZGPAT					MNT		ZFHX2
		RAD21				GFI1B			GATAD2B	MIXL1							SKI			GFI1B	KDM1A					MIXL1		ZGPAT
		GATAD2A				PRDM10			RUNX3	ZXDB							SIN3A			PRDM10	PBX2					ZXDB		ZBTB26
		HNRNPL				ZBTB17			NBN	ZNF280D							EMSY			ZBTB17	EMSY					ZNF280D		MLLT1
		GTF2F1				GLIS2			RELB	ATF1							TEAD1			GLIS2	PRDM1					ATF1		PRDM1
		XRCC5				SOX6			KLF8	TARDBP							NR2F2			SOX6	SCRT2					TARDBP		ZNF335
		ZNF692				RXRA			POLR2B	ZEB2							NR2F1			RXRA	ZNF335					ZEB2
		MTA1				RB1			ETV6	NANOG										RB1	ZBTB44					NANOG
		KDM4B				ZNF501			ZBTB20	TGIF2										ZNF501	ERF					TGIF2
		PATZ1				ELF4			ZBTB40	XRCC5										ELF4						XRCC5
		TCF7				BACH1			ARNT	ZNF692										BACH1						ZNF692
		CHD2				MTA3			ZNF777	CBFA2T2										MTA3						CBFA2T2
		RNF2				ATF7			ZNF121	MTA2										ATF7						MTA2
		LARP7				GATAD2B			HMBOX1	OSR2										GATAD2B						OSR2
		ZNF24				RUNX3			ZBTB11	IKZF2										RUNX3						IKZF2
		ZNF239				ZSCAN18			RBFOX2	RNF2										ZSCAN18						RNF2
		MZF1				KLF8			ZFHX2	KAT8										KLF8						KAT8
		TRIM22				POLR2B			ZGPAT	LARP7										POLR2B						LARP7
		PRDM10				TRIM28			OVOL3	IRF2										TRIM28						IRF2
		ZKSCAN8				TSHZ1			PBX2	CTBP1										TSHZ1						CTBP1
		ZBTB17				ZBTB20			MLLT1	MZF1										ZBTB20						MZF1
		GLIS2				GATAD2A			ZBTB26	TRIM22										GATAD2A						TRIM22
		SOX6				ZSCAN29			ZNF335	ZBTB17										ZSCAN29						ZBTB17
		ZBTB6				BCOR			MYC	GLIS2										BCOR						GLIS2
		EED				USF1			ZBTB44	SOX6										USF1						SOX6
		NFRKB				ZBTB11			MGA	ZNF626										ZBTB11						ZNF626
		ZHX2				GABPA			UBTF	GABPA										GABPA						GABPA
		IKZF2				AFF1				EED										AFF1						EED
		TFDP1				NR2F2				YBX1										NR2F2						YBX1
		TCF12				BRD9				ZHX2										BRD9						ZHX2
		ZNF501				ZSCAN5C				TFDP1										ZSCAN5C						TFDP1
		DPF2				EP300				ZNF501										EP300						ZNF501
		PHF8				ZFHX2				DPF2										ZFHX2						DPF2
		MTA3				ZBTB2				PHF8										ZBTB2						PHF8
		ZSCAN29				PML				MTA3										PML						MTA3
		GATAD2B				EMSY				ZSCAN29										EMSY						ZSCAN29
		U2AF1				ZBTB26				ATF7										ZBTB26						ATF7
		CBX3				PRDM1				GATAD2B										PRDM1						GATAD2B
		ZKSCAN1				SCRT2				CBX3										SCRT2						CBX3
		BRCA1				ZNF335				RUNX3										ZNF335						RUNX3
		KLF8				MYC				EP300										MYC						EP300
		POLR2B				MTA1				NBN										MTA1						NBN
		FOXA3				BCLAF1				RELB										BCLAF1						RELB
		MNT				ZBTB44				KLF8										ZBTB44						KLF8
		CC2D1A				MGA				FOXA3										MGA						FOXA3
		ZNF777								POLR2B																POLR2B
		MTA2								ARNT																ARNT
		AHR								ZBTB11																ZBTB11
		ZBTB11								RBFOX2																RBFOX2
		RBFOX2								CBFA2T3																CBFA2T3
		EP300								ZSCAN5C																ZSCAN5C
		TFE3								ZFHX2																ZFHX2
		SMARCA5								ZGPAT																ZGPAT
		ZBTB25								OVOL3																OVOL3
		BRD9								PML																PML
		ZFHX2								SKI																SKI
		TARDBP								MLLT1																MLLT1
		ZGPAT								ZBTB26																ZBTB26
		ZBTB2								PRDM1																PRDM1
		PML								ZNF335																ZNF335
		SKI								GMEB2																GMEB2
		EMSY								SREBF2																SREBF2
		ZBTB26								BCLAF1																BCLAF1
		SCRT2								ERF																ERF
		ZNF335								MGA																MGA
		SREBF2								WT1																WT1
		BCLAF1
		E2F1
		MIER1
		ERF
		KAT8
		MGA
		UBTF

## Sheet: TFs distribution
lincRNAs	A number of TFs	Transcriptional factors (TFs)
LINC00470 LINC00526 LINC00667 LINC00907 LINC01415 LINC01416 LINC01630 LINC01882 LINC01895 LINC01909 LINC01910 LINC01926 LINC01929 LINC02565 LINC02837 LINC02856 LINC02864 LINC02979 LINC03110	1	POLR2A
LINC00667 LINC00907 LINC01255 LINC01415 LINC01478 LINC01630 LINC01882 LINC01894 LINC01900 LINC01901 LINC01902 LINC01909 LINC01910 LINC01929 LINC02565 LINC02979 LINC03035 LINC03110	1	RAD21
LINC00470 LINC00526 LINC01415 LINC01630 LINC01882 LINC01895 LINC01909 LINC01910 LINC01915 LINC01926 LINC01929 LINC02565 LINC02837 LINC02864 LINC02958 LINC02979 LINC03035	1	PKNOX1
LINC00470 LINC00667 LINC00907 LINC01415 LINC01630 LINC01882 LINC01894 LINC01895 LINC01900 LINC01909 LINC01910 LINC01929 LINC02565 LINC02856 LINC02979 LINC03035 LINC03110	1	SP1
LINC00667 LINC00907 LINC01415 LINC01630 LINC01882 LINC01895 LINC01900 LINC01901 LINC01902 LINC01909 LINC01910 LINC01929 LINC02565 LINC02958 LINC02979 LINC03035 LINC03110	1	YY1
LINC00526 LINC00667 LINC00907 LINC01255 LINC01415 LINC01630 LINC01882 LINC01895 LINC01900 LINC01909 LINC01910 LINC01929 LINC02565 LINC02979 LINC03035 LINC03110	1	REST
LINC00470 LINC00667 LINC01255 LINC01415 LINC01882 LINC01895 LINC01900 LINC01909 LINC01910 LINC01926 LINC01929 LINC02565 LINC02958 LINC02979	1	CREM
LINC00470 LINC01255 LINC01416 LINC01630 LINC01882 LINC01895 LINC01900 LINC01909 LINC01910 LINC02864 LINC02958 LINC02979 LINC03035 LINC03110	1	NR2F1
LINC00526 LINC00667 LINC01255 LINC01415 LINC01630 LINC01882 LINC01901 LINC01902 LINC01910 LINC01929 LINC02565 LINC02837 LINC02979 LINC03110	1	SIN3A
LINC00526 LINC00667 LINC01387 LINC01415 LINC01630 LINC01882 LINC01901 LINC01902 LINC01926 LINC01929 LINC02565 LINC02979 LINC03035 LINC03110	1	ZNF335
LINC00526 LINC01415 LINC01478 LINC01630 LINC01882 LINC01894 LINC01901 LINC01902 LINC01929 LINC02565 LINC02958 LINC02979 LINC03035 LINC03110	1	CTCF
LINC00667 LINC01255 LINC01415 LINC01630 LINC01882 LINC01895 LINC01900 LINC01909 LINC01910 LINC01929 LINC02565 LINC02979 LINC03035 LINC03110	1	MAX
LINC00667 LINC01255 LINC01415 LINC01630 LINC01882 LINC01901 LINC01902 LINC01909 LINC01910 LINC01915 LINC01929 LINC02958 LINC02979 LINC03110	1	BHLHE40
LINC00470 LINC00526 LINC00667 LINC01415 LINC01630 LINC01882 LINC01895 LINC01901 LINC01902 LINC01929 LINC02565 LINC02864 LINC02979	1	L3MBTL2
LINC00470 LINC00526 LINC00667 LINC01415 LINC01630 LINC01882 LINC01895 LINC01909 LINC01910 LINC01929 LINC02565 LINC02979 LINC03110	1	TBP
LINC00470 LINC00667 LINC01415 LINC01416 LINC01630 LINC01882 LINC01895 LINC01901 LINC01902 LINC01929 LINC02864 LINC02958 LINC02979	1	MNT
LINC00470 LINC00667 LINC01415 LINC01416 LINC01882 LINC01895 LINC01900 LINC01909 LINC01910 LINC01929 LINC02565 LINC02979 LINC03110	1	EGR1
LINC00526 LINC00667 LINC00907 LINC01415 LINC01630 LINC01882 LINC01901 LINC01902 LINC01910 LINC01929 LINC02565 LINC02979 LINC03110	1	TAF1
LINC00526 LINC00667 LINC01255 LINC01415 LINC01630 LINC01882 LINC01901 LINC01902 LINC01909 LINC01929 LINC02565 LINC02979 LINC03110	1	ZBTB26
LINC00667 LINC01255 LINC01415 LINC01630 LINC01882 LINC01900 LINC01901 LINC01902 LINC01929 LINC02565 LINC02856 LINC02979 LINC03110	1	PRDM1
LINC00470 LINC00667 LINC01255 LINC01415 LINC01630 LINC01882 LINC01900 LINC01909 LINC01910 LINC01929 LINC02864 LINC02979	1	ATF1
LINC00470 LINC00667 LINC01415 LINC01416 LINC01630 LINC01882 LINC01909 LINC01926 LINC01929 LINC02565 LINC02979 LINC03110	1	NRF1
LINC00470 LINC01255 LINC01415 LINC01882 LINC01909 LINC01910 LINC01915 LINC01929 LINC02565 LINC02864 LINC02979 LINC03110	1	ZNF384
LINC00526 LINC00667 LINC01387 LINC01415 LINC01630 LINC01882 LINC01910 LINC01915 LINC01929 LINC02565 LINC02979 LINC03110	1	ZFHX2
LINC00526 LINC00667 LINC01415 LINC01630 LINC01882 LINC01895 LINC01910 LINC01926 LINC01929 LINC02979 LINC03035 LINC03110	1	SP7
LINC00526 LINC00667 LINC01415 LINC01630 LINC01882 LINC01901 LINC01902 LINC01929 LINC02565 LINC02958 LINC02979 LINC03110	1	ZBTB11
LINC00667 LINC01255 LINC01415 LINC01416 LINC01630 LINC01882 LINC01910 LINC01929 LINC02837 LINC02856 LINC02958 LINC02979	1	CTBP1
LINC00667 LINC01255 LINC01416 LINC01630 LINC01895 LINC01909 LINC01910 LINC01915 LINC02565 LINC02864 LINC03035 LINC03110	1	CEBPB
LINC00667 LINC01255 LINC01630 LINC01882 LINC01900 LINC01901 LINC01902 LINC01909 LINC01910 LINC02565 LINC02979 LINC03110	2	BCL6 ZGPAT
LINC00667 LINC01387 LINC01415 LINC01630 LINC01882 LINC01895 LINC01910 LINC01929 LINC02565 LINC02864 LINC02979 LINC03035	1	MEIS2
LINC00667 LINC01415 LINC01630 LINC01882 LINC01895 LINC01900 LINC01909 LINC01929 LINC02565 LINC02958 LINC02979 LINC03110	1	GABPA
LINC00470 LINC00667 LINC01255 LINC01415 LINC01416 LINC01882 LINC01900 LINC01909 LINC01910 LINC01929 LINC02979	1	NCOR1
LINC00470 LINC00667 LINC01255 LINC01630 LINC01882 LINC01909 LINC01910 LINC02856 LINC02958 LINC02979 LINC03110	1	DPF2
LINC00526 LINC00667 LINC01415 LINC01630 LINC01882 LINC01895 LINC01909 LINC01929 LINC02565 LINC02979 LINC03110	1	ZFP37
LINC00526 LINC00667 LINC01415 LINC01630 LINC01882 LINC01895 LINC01910 LINC01929 LINC02958 LINC02979 LINC03035	1	KLF1
LINC00526 LINC00667 LINC01415 LINC01630 LINC01882 LINC01895 LINC01926 LINC01929 LINC02856 LINC02979 LINC03110	1	ZXDB
LINC00526 LINC00667 LINC01415 LINC01630 LINC01882 LINC01901 LINC01902 LINC01910 LINC01929 LINC02565 LINC02979	1	ZBTB17
LINC00526 LINC00667 LINC01415 LINC01630 LINC01882 LINC01901 LINC01902 LINC01929 LINC02565 LINC02979 LINC03110	2	GLIS2 ZNF600
LINC00526 LINC00667 LINC01415 LINC01630 LINC01882 LINC01901 LINC01902 LINC01929 LINC02565 LINC02837 LINC02979	1	ZNF341
LINC00526 LINC00667 LINC01415 LINC01630 LINC01882 LINC01915 LINC01929 LINC02565 LINC02979 LINC03035 LINC03110	1	ZNF398
LINC00667 LINC01255 LINC01415 LINC01630 LINC01882 LINC01910 LINC01929 LINC02565 LINC02856 LINC02979 LINC03110	1	TCF12
LINC00667 LINC01255 LINC01415 LINC01882 LINC01895 LINC01909 LINC01910 LINC01929 LINC02856 LINC02979 LINC03110	1	EP300
LINC00667 LINC01255 LINC01882 LINC01900 LINC01901 LINC01902 LINC01909 LINC01910 LINC02565 LINC02979 LINC03110	1	SMAD4
LINC00667 LINC01387 LINC01415 LINC01630 LINC01882 LINC01909 LINC01929 LINC02565 LINC02856 LINC02979 LINC03110	1	CHD2
LINC00667 LINC01415 LINC01416 LINC01630 LINC01882 LINC01910 LINC01929 LINC02864 LINC02958 LINC02979 LINC03110	1	IKZF1
LINC00667 LINC01415 LINC01882 LINC01895 LINC01909 LINC01910 LINC01929 LINC02565 LINC02856 LINC02864 LINC02979	1	ZNF316
LINC01255 LINC01478 LINC01882 LINC01901 LINC01902 LINC01909 LINC01910 LINC02565 LINC02958 LINC02979 LINC03035	1	SMC3
LINC00470 LINC00526 LINC00667 LINC01255 LINC01882 LINC01909 LINC02856 LINC02864 LINC02979 LINC03110	1	ATF2
LINC00470 LINC00526 LINC00667 LINC01415 LINC01630 LINC01929 LINC02565 LINC02856 LINC03035 LINC03110	1	PRDM10
LINC00470 LINC00667 LINC01255 LINC01415 LINC01416 LINC01895 LINC01909 LINC01910 LINC01929 LINC02864	1	FOXK2
LINC00470 LINC00667 LINC01415 LINC01416 LINC01630 LINC01882 LINC01895 LINC01929 LINC02864 LINC02979	1	MGA
LINC00470 LINC00667 LINC01415 LINC01416 LINC01630 LINC01882 LINC01910 LINC01929 LINC02864 LINC02979	1	HDAC1
LINC00470 LINC00667 LINC01415 LINC01416 LINC01630 LINC01882 LINC01910 LINC01929 LINC02958 LINC02979	1	MTA2
LINC00470 LINC00667 LINC01415 LINC01630 LINC01882 LINC01909 LINC01910 LINC01929 LINC02864 LINC02979	1	SMARCA4
LINC00470 LINC00667 LINC01415 LINC01882 LINC01909 LINC01910 LINC01929 LINC02565 LINC02864 LINC02979	1	HDAC2
LINC00470 LINC00667 LINC01630 LINC01882 LINC01909 LINC01910 LINC02864 LINC02958 LINC02979 LINC03110	1	ELF1
LINC00470 LINC01255 LINC01415 LINC01416 LINC01882 LINC01909 LINC01910 LINC01929 LINC02856 LINC02979	1	ATF7
LINC00470 LINC01255 LINC01882 LINC01900 LINC01909 LINC01910 LINC02565 LINC02837 LINC02958 LINC02979	1	KDM1A
LINC00526 LINC00667 LINC00907 LINC01415 LINC01630 LINC01882 LINC01929 LINC02565 LINC02979 LINC03110	1	GLIS1
LINC00526 LINC00667 LINC01387 LINC01415 LINC01630 LINC01915 LINC01929 LINC02565 LINC03035 LINC03110	1	EGR2
LINC00526 LINC00667 LINC01415 LINC01630 LINC01882 LINC01901 LINC01902 LINC01929 LINC02565 LINC02979	1	KLF8
LINC00526 LINC00667 LINC01415 LINC01630 LINC01901 LINC01902 LINC01929 LINC02565 LINC03035 LINC03110	1	PATZ1
LINC00526 LINC00667 LINC01415 LINC01882 LINC01909 LINC01910 LINC01929 LINC02565 LINC02979 LINC03035	1	ZNF580
LINC00526 LINC00907 LINC01415 LINC01895 LINC01900 LINC01909 LINC01910 LINC01929 LINC02565 LINC03035	1	HNF4A
LINC00667 LINC01255 LINC01630 LINC01882 LINC01900 LINC01909 LINC01910 LINC02565 LINC02979 LINC03110	2	SAP130 KAT8
LINC00667 LINC01255 LINC01882 LINC01895 LINC01900 LINC01909 LINC01910 LINC02565 LINC02979 LINC03110	1	IRF2
LINC00667 LINC01255 LINC01882 LINC01895 LINC01900 LINC01909 LINC01910 LINC02864 LINC02979 LINC03110	1	NR2F6
LINC00667 LINC01630 LINC01882 LINC01900 LINC01901 LINC01902 LINC01909 LINC01910 LINC02565 LINC02979	1	ZNF48
LINC00907 LINC01415 LINC01895 LINC01900 LINC01909 LINC01910 LINC01929 LINC02958 LINC03035 LINC03110	1	RXRA
LINC00470 LINC00667 LINC00907 LINC01895 LINC01900 LINC01909 LINC01910 LINC02864 LINC03110	1	ATF3
LINC00470 LINC00667 LINC01415 LINC01416 LINC01630 LINC01882 LINC01929 LINC02864 LINC02979	2	EP400 SUPT5H
LINC00470 LINC00667 LINC01415 LINC01416 LINC01882 LINC01910 LINC01929 LINC02864 LINC02979	1	GTF2F1
LINC00470 LINC00667 LINC01415 LINC01630 LINC01882 LINC01929 LINC02565 LINC02958 LINC02979	1	GABPB1
LINC00470 LINC00667 LINC01415 LINC01630 LINC01882 LINC01929 LINC02864 LINC02979 LINC03110	2	NKRF SMAD5
LINC00470 LINC00667 LINC01415 LINC01630 LINC01882 LINC01929 LINC02864 LINC02958 LINC02979	2	NBN MYC
LINC00470 LINC00667 LINC01415 LINC01895 LINC01910 LINC01929 LINC02565 LINC02856 LINC02864	1	EMSY
LINC00470 LINC01415 LINC01630 LINC01882 LINC01895 LINC01929 LINC02958 LINC02979 LINC03110	1	MLLT1
LINC00526 LINC00667 LINC01255 LINC01900 LINC01909 LINC01910 LINC02565 LINC02856 LINC03110	1	RARA
LINC00526 LINC00667 LINC01415 LINC01630 LINC01882 LINC01910 LINC01929 LINC02565 LINC02979	1	ZEB2
LINC00526 LINC00667 LINC01415 LINC01630 LINC01882 LINC01929 LINC02565 LINC02979 LINC03110	4	SP3 ZNF501 ZNF692 KLF9
LINC00526 LINC01415 LINC01630 LINC01894 LINC01895 LINC01929 LINC02565 LINC02856 LINC03035	1	ZNF366
LINC00667 LINC01255 LINC01415 LINC01895 LINC01909 LINC01910 LINC01929 LINC02565 LINC02856	1	MAFK
LINC00667 LINC01255 LINC01630 LINC01882 LINC01900 LINC01909 LINC01910 LINC02979 LINC03110	2	ARID3A ELF3
LINC00667 LINC01255 LINC01630 LINC01882 LINC01909 LINC01910 LINC02565 LINC02979 LINC03110	1	ZSCAN9
LINC00667 LINC01255 LINC01882 LINC01900 LINC01901 LINC01902 LINC01909 LINC01910 LINC02979	1	IKZF5
LINC00667 LINC01255 LINC01882 LINC01900 LINC01901 LINC01902 LINC01909 LINC02565 LINC02979	2	XRCC5 ERF
LINC00667 LINC01255 LINC01882 LINC01900 LINC01909 LINC01910 LINC02565 LINC02979 LINC03110	1	RXRB
LINC00667 LINC01415 LINC01416 LINC01630 LINC01882 LINC01909 LINC01929 LINC02979 LINC03110	1	ZNF24
LINC00667 LINC01415 LINC01416 LINC01630 LINC01882 LINC01929 LINC02565 LINC02979 LINC03110	1	ZSCAN29
LINC00667 LINC01415 LINC01478 LINC01882 LINC01895 LINC01929 LINC02864 LINC02979 LINC03110	1	ZNF592
LINC00667 LINC01415 LINC01630 LINC01882 LINC01909 LINC01929 LINC02565 LINC02979 LINC03110	1	BACH1
LINC00667 LINC01415 LINC01630 LINC01882 LINC01929 LINC02856 LINC02958 LINC02979 LINC03110	1	GATAD2B
LINC00667 LINC01415 LINC01630 LINC01900 LINC01909 LINC01910 LINC01929 LINC02565 LINC02856	1	ZBTB33
LINC00667 LINC01415 LINC01882 LINC01910 LINC01929 LINC02565 LINC02864 LINC02979 LINC03110	1	RNF2
LINC00667 LINC01630 LINC01882 LINC01900 LINC01909 LINC01910 LINC02565 LINC02979 LINC03110	2	DRAP1 ARID4B
LINC00907 LINC01255 LINC01415 LINC01882 LINC01900 LINC01909 LINC01910 LINC01929 LINC02979	1	ETS1
LINC00907 LINC01882 LINC01895 LINC01901 LINC01902 LINC01926 LINC02565 LINC02837 LINC02979	1	FEZF1
LINC01255 LINC01415 LINC01895 LINC01900 LINC01909 LINC01910 LINC01929 LINC02856 LINC03110	1	JUND
LINC01255 LINC01882 LINC01900 LINC01909 LINC01910 LINC02565 LINC02856 LINC02979 LINC03110	1	TEAD3
LINC00470 LINC00667 LINC01415 LINC01416 LINC01882 LINC01929 LINC02864 LINC02979	1	TAF7
LINC00470 LINC00667 LINC01415 LINC01630 LINC01882 LINC01910 LINC01929 LINC02979	1	MTA3
LINC00470 LINC00667 LINC01415 LINC01630 LINC01882 LINC01929 LINC02864 LINC02979	1	POLR2B
LINC00470 LINC00667 LINC01415 LINC01882 LINC01910 LINC01929 LINC02864 LINC02979	1	FOXM1
LINC00526 LINC00667 LINC01415 LINC01630 LINC01882 LINC01929 LINC02979 LINC03035	1	KLF17
LINC00526 LINC00667 LINC01415 LINC01630 LINC01901 LINC01902 LINC01910 LINC01929	1	KLF16
LINC00526 LINC00667 LINC01415 LINC01630 LINC01926 LINC01929 LINC02565 LINC03110	1	ZBTB8A
LINC00526 LINC01387 LINC01882 LINC01901 LINC01902 LINC02565 LINC02837 LINC02979	1	ZIC2
LINC00526 LINC01415 LINC01630 LINC01882 LINC01895 LINC01926 LINC01929 LINC02979	1	ZNF843
LINC00526 LINC01415 LINC01630 LINC01901 LINC01902 LINC01929 LINC02565 LINC03110	1	ZBTB48
LINC00667 LINC00907 LINC01255 LINC01895 LINC01900 LINC01909 LINC01910 LINC03110	1	FOXA2
LINC00667 LINC01255 LINC01415 LINC01416 LINC01900 LINC01909 LINC01910 LINC01929	1	GATAD2A
LINC00667 LINC01255 LINC01630 LINC01882 LINC01910 LINC02565 LINC02979 LINC03110	1	TFDP1
LINC00667 LINC01255 LINC01882 LINC01900 LINC01909 LINC01910 LINC02979 LINC03110	1	FOXA3
LINC00667 LINC01255 LINC01882 LINC01901 LINC01902 LINC01909 LINC01910 LINC02979	1	MIXL1
LINC00667 LINC01415 LINC01630 LINC01882 LINC01895 LINC01910 LINC01929 LINC02979	1	SOX6
LINC00667 LINC01630 LINC01882 LINC01909 LINC01910 LINC02565 LINC02979 LINC03110	1	RBFOX2
LINC00667 LINC01882 LINC01901 LINC01902 LINC01909 LINC01910 LINC02565 LINC02979	1	DMAP1
LINC00907 LINC01387 LINC01630 LINC01882 LINC01901 LINC01902 LINC02979 LINC03110	1	GATA2
LINC01255 LINC01882 LINC01901 LINC01902 LINC01909 LINC01910 LINC02979 LINC03110	1	PPARG
LINC01255 LINC01894 LINC01895 LINC01909 LINC01910 LINC01915 LINC02856 LINC02958	1	FOS
LINC01415 LINC01630 LINC01882 LINC01926 LINC01929 LINC02958 LINC02979 LINC03110	1	RUNX3
LINC01415 LINC01882 LINC01926 LINC01929 LINC02837 LINC02979 LINC03035 LINC03110	1	PRDM6
LINC00470 LINC00667 LINC01415 LINC01416 LINC01929 LINC02864 LINC02958	1	NFRKB
LINC00470 LINC00667 LINC01415 LINC01630 LINC01882 LINC01929 LINC02979	1	SKIL
LINC00470 LINC00667 LINC01415 LINC01882 LINC01929 LINC02979 LINC03110	1	GMEB1
LINC00470 LINC01255 LINC01416 LINC01895 LINC01909 LINC01910 LINC02856	1	SMARCE1
LINC00470 LINC01415 LINC01630 LINC01882 LINC01929 LINC02958 LINC02979	1	ZBTB40
LINC00526 LINC00667 LINC01415 LINC01630 LINC01929 LINC02565 LINC03110	1	SP2
LINC00526 LINC00907 LINC01882 LINC01926 LINC02856 LINC02979 LINC03035	1	WT1
LINC00526 LINC01387 LINC01415 LINC01630 LINC01929 LINC02565 LINC03035	1	ZSCAN4
LINC00526 LINC01415 LINC01478 LINC01630 LINC01929 LINC02565 LINC03110	1	ZNF660
LINC00526 LINC01415 LINC01630 LINC01895 LINC01901 LINC01902 LINC01929	1	KLF7
LINC00526 LINC01415 LINC01630 LINC01895 LINC01926 LINC01929 LINC02565	1	PRDM4
LINC00526 LINC01415 LINC01630 LINC01901 LINC01902 LINC01929 LINC02565	1	ZNF2
LINC00667 LINC01255 LINC01630 LINC01909 LINC01910 LINC02864 LINC03110	1	CEBPG
LINC00667 LINC01255 LINC01882 LINC01895 LINC02856 LINC02979 LINC03110	1	ZNF217
LINC00667 LINC01255 LINC01882 LINC01900 LINC01909 LINC01910 LINC02979	1	SKI
LINC00667 LINC01255 LINC01895 LINC01900 LINC01909 LINC01910 LINC03110	1	TCF7
LINC00667 LINC01255 LINC01900 LINC01909 LINC01910 LINC02565 LINC03110	3	SOX13 SOX5 NFIL3
LINC00667 LINC01415 LINC01630 LINC01882 LINC01929 LINC02979 LINC03110	2	RB1 ZFX
LINC00667 LINC01415 LINC01882 LINC01910 LINC01929 LINC02979 LINC03110	1	TARDBP
LINC00667 LINC01415 LINC01882 LINC01929 LINC02565 LINC02979 LINC03035	1	SCRT1
LINC00667 LINC01478 LINC01630 LINC01882 LINC02565 LINC02958 LINC02979	1	TRIM22
LINC00667 LINC01630 LINC01882 LINC01895 LINC02958 LINC02979 LINC03110	1	IKZF2
LINC00667 LINC01630 LINC01882 LINC01909 LINC02565 LINC02979 LINC03110	1	PHF8
LINC00667 LINC01895 LINC01909 LINC02565 LINC02856 LINC02864 LINC03110	1	MAFG
LINC00907 LINC01415 LINC01882 LINC01894 LINC01929 LINC02856 LINC02979	1	NANOG
LINC01255 LINC01630 LINC01882 LINC01909 LINC01910 LINC02565 LINC02979	1	ZNF792
LINC01255 LINC01630 LINC01900 LINC01901 LINC01902 LINC01909 LINC02565	1	RBPJ
LINC01387 LINC01415 LINC01882 LINC01910 LINC01929 LINC02856 LINC02979	1	TEAD4
LINC01415 LINC01630 LINC01882 LINC01926 LINC01929 LINC02565 LINC02979	1	ZNF610
LINC01415 LINC01882 LINC01926 LINC01929 LINC02565 LINC02979 LINC03035	1	OSR2
LINC01630 LINC01882 LINC01909 LINC01910 LINC02565 LINC02979 LINC03110	1	TGIF2
LINC00470 LINC00667 LINC01255 LINC01415 LINC01929 LINC02856	1	MTA1
LINC00470 LINC01415 LINC01416 LINC01630 LINC01929 LINC02864	1	TAF9B
LINC00526 LINC00667 LINC01415 LINC01630 LINC01929 LINC03110	2	ZFP69B ZBTB10
LINC00526 LINC00667 LINC01415 LINC01630 LINC01929 LINC02565	1	ZBTB12
LINC00526 LINC00667 LINC01630 LINC01901 LINC01902 LINC02565	1	ZNF777
LINC00526 LINC00907 LINC01415 LINC01882 LINC01929 LINC02979	1	ZNF18
LINC00526 LINC01387 LINC01895 LINC02565 LINC02837 LINC03110	1	EZH2
LINC00526 LINC01415 LINC01630 LINC01882 LINC01929 LINC02979	2	ZNF324 ZSCAN5A
LINC00526 LINC01415 LINC01630 LINC01895 LINC01929 LINC02565	1	ZEB1
LINC00526 LINC01415 LINC01630 LINC01929 LINC02565 LINC03110	1	ZBTB20
LINC00526 LINC01415 LINC01630 LINC01929 LINC02856 LINC03035	1	ZNF629
LINC00526 LINC01415 LINC01882 LINC01929 LINC02565 LINC02979	1	ZSCAN16
LINC00526 LINC01630 LINC01882 LINC02979 LINC03035 LINC03110	1	ZSCAN21
LINC00667 LINC01255 LINC01882 LINC01909 LINC01910 LINC02979	1	ZHX2
LINC00667 LINC01255 LINC01882 LINC02958 LINC02979 LINC03110	1	EBF1
LINC00667 LINC01255 LINC01895 LINC02565 LINC02856 LINC03035	1	RFX5
LINC00667 LINC01255 LINC01900 LINC01909 LINC01910 LINC03110	3	TFAP4 HLF CEBPA
LINC00667 LINC01255 LINC01909 LINC02856 LINC02864 LINC02958	1	CREB1
LINC00667 LINC01415 LINC01882 LINC01910 LINC01929 LINC02979	3	PML TBL1XR1 NFIC
LINC00667 LINC01415 LINC01882 LINC01929 LINC02979 LINC03110	1	BCLAF1
LINC00667 LINC01415 LINC01882 LINC01929 LINC02958 LINC02979	1	HCFC1
LINC00667 LINC01415 LINC01909 LINC01929 LINC02565 LINC03035	1	SCRT2
LINC00667 LINC01630 LINC01882 LINC02565 LINC02979 LINC03110	1	HNRNPL
LINC00667 LINC01630 LINC01882 LINC02958 LINC02979 LINC03110	2	EED ZNF687
LINC00667 LINC01630 LINC01900 LINC01909 LINC02565 LINC03110	1	ZNF205
LINC00907 LINC01415 LINC01900 LINC01909 LINC01910 LINC01929	1	NR2F2
LINC01255 LINC01415 LINC01909 LINC01929 LINC02565 LINC02856	1	MAFF
LINC01255 LINC01901 LINC01902 LINC01910 LINC02856 LINC03035	1	RFX1
LINC01415 LINC01630 LINC01882 LINC01929 LINC02565 LINC02979	1	ZNF280D
LINC01415 LINC01630 LINC01882 LINC01929 LINC02958 LINC02979	1	CBX1
LINC01415 LINC01882 LINC01926 LINC01929 LINC02958 LINC02979	1	IRF4
LINC01416 LINC01882 LINC02837 LINC02864 LINC02979 LINC03110	1	ATF4
LINC01630 LINC01882 LINC01909 LINC02565 LINC02979 LINC03110	2	GATAD1 KMT2B
LINC01882 LINC01901 LINC01902 LINC01909 LINC02565 LINC02979	1	KDM3A
LINC00470 LINC00667 LINC01415 LINC01416 LINC01929	1	BRD9
LINC00470 LINC01630 LINC01882 LINC01910 LINC02979	1	ARNT
LINC00526 LINC00667 LINC01387 LINC01630 LINC02565	1	ZBTB6
LINC00526 LINC00667 LINC01415 LINC01630 LINC01929	1	KLF10
LINC00526 LINC00667 LINC01415 LINC01929 LINC03035	1	ZNF239
LINC00526 LINC01415 LINC01630 LINC01929 LINC03110	1	ZNF189
LINC00667 LINC01255 LINC01630 LINC01909 LINC02565	1	MBD1
LINC00667 LINC01255 LINC01882 LINC01910 LINC02979	1	ETV4
LINC00667 LINC01255 LINC01900 LINC01909 LINC01910	4	FOXP1 ZNF644 HMG20A KDM6A
LINC00667 LINC01415 LINC01882 LINC01929 LINC02979	2	MZF1 SAFB
LINC00667 LINC01630 LINC01882 LINC02979 LINC03110	3	SMARCA5 LARP7 ZNF207
LINC00667 LINC01630 LINC01882 LINC01900 LINC02979	1	RCOR1
LINC00667 LINC01630 LINC01909 LINC01910 LINC02565	1	ZNF511
LINC00667 LINC01882 LINC02864 LINC02958 LINC02979	1	CBX3
LINC00667 LINC01895 LINC01926 LINC02565 LINC02958	2	JUNB BATF
LINC00907 LINC01255 LINC01900 LINC01909 LINC01910	1	FOXA1
LINC01255 LINC01630 LINC01900 LINC01910 LINC02565	1	SP5
LINC01255 LINC01882 LINC01909 LINC02979 LINC03110	1	GATA4
LINC01255 LINC01882 LINC02565 LINC02979 LINC03110	1	HIC1
LINC01255 LINC01900 LINC01909 LINC01910 LINC02565	1	MLX
LINC01255 LINC01900 LINC01909 LINC01910 LINC02856	1	TEAD1
LINC01255 LINC01900 LINC01909 LINC02565 LINC03110	1	THAP11
LINC01387 LINC01882 LINC01910 LINC02958 LINC02979	1	CBFA2T3
LINC01415 LINC01478 LINC01630 LINC01929 LINC02565	1	ZNF143
LINC01415 LINC01882 LINC01929 LINC02979 LINC03110	1	ZNF561
LINC01415 LINC01901 LINC01902 LINC01929 LINC03035	1	TRIM28
LINC01416 LINC01882 LINC01909 LINC01910 LINC02979	1	ARID1B
LINC01630 LINC01882 LINC01895 LINC02565 LINC02979	1	ZFP91
LINC01630 LINC01882 LINC01901 LINC01902 LINC02979	1	MXD3
LINC01630 LINC01882 LINC02958 LINC02979 LINC03110	1	RELB
LINC01630 LINC01900 LINC01909 LINC01910 LINC02565	1	MIER3
LINC01882 LINC01909 LINC02565 LINC02979 LINC03110	1	KLF6
LINC01882 LINC01915 LINC02958 LINC02979 LINC03110	1	SPI1
LINC00470 LINC00667 LINC01415 LINC01929	1	ZC3H8
LINC00470 LINC01415 LINC01910 LINC01929	3	AFF1 CHAMP1 ZNF184
LINC00470 LINC01630 LINC01895 LINC02864	1	RAD51
LINC00526 LINC01255 LINC01882 LINC02979	1	BCL11A
LINC00526 LINC01630 LINC02837 LINC02958	1	ZNF121
LINC00667 LINC01255 LINC01909 LINC03110	1	HBP1
LINC00667 LINC01255 LINC01909 LINC01910	1	ZKSCAN8
LINC00667 LINC01255 LINC01909 LINC02565	1	ZBTB25
LINC00667 LINC01415 LINC01929 LINC02856	1	ZBTB2
LINC00667 LINC01415 LINC01929 LINC02958	1	YY2
LINC00667 LINC01630 LINC02565 LINC03110	1	UBTF
LINC00667 LINC01882 LINC02979 LINC03110	1	STAT1
LINC00667 LINC01882 LINC01895 LINC02979	1	ASH2L
LINC00667 LINC01882 LINC02565 LINC02979	1	MBD2
LINC00907 LINC01882 LINC01894 LINC02979	1	POU5F1
LINC01255 LINC01415 LINC01929 LINC02856	1	CUX1
LINC01255 LINC01900 LINC01909 LINC01910	4	LCORL FOSL2 HOMEZ RERE
LINC01255 LINC02565 LINC03035 LINC03110	1	TCF7L2
LINC01387 LINC01882 LINC01910 LINC02979	1	CBFA2T2
LINC01415 LINC01478 LINC01630 LINC01929	1	ZNF664
LINC01415 LINC01630 LINC01929 LINC02565	1	ZBTB44
LINC01415 LINC01882 LINC01929 LINC02979	3	ZFP3 ZNF362 ZSCAN5C
LINC01478 LINC01901 LINC01902 LINC03035	1	ZNF654
LINC01630 LINC01882 LINC02979 LINC03110	1	ZNF626
LINC01630 LINC01882 LINC02958 LINC02979	1	HDGF
LINC01630 LINC01900 LINC01910 LINC02565	1	PBX2
LINC01882 LINC01909 LINC01910 LINC02979	1	SSRP1
LINC01882 LINC01910 LINC02565 LINC02979	1	TAL1
LINC01900 LINC01909 LINC01910 LINC02565	1	HNF4G
LINC01901 LINC01902 LINC01910 LINC02856	1	RFX3
LINC00470 LINC00667 LINC01910	1	CC2D1A
LINC00470 LINC00667 LINC02864	1	E2F1
LINC00470 LINC01415 LINC01929	2	BCOR NUFIP1
LINC00470 LINC01416 LINC01910	1	TRIM24
LINC00470 LINC01630 LINC02864	1	HMBOX1
LINC00470 LINC01910 LINC02958	1	NCOA1
LINC00470 LINC02864 LINC02958	1	NR2C1
LINC00526 LINC01415 LINC01929	2	ZNF785 ZSCAN18
LINC00526 LINC01630 LINC02565	1	PRDM2
LINC00526 LINC01926 LINC02565	1	ZSCAN26
LINC00667 LINC01255 LINC03110	2	ZFP64 PAX5
LINC00667 LINC01415 LINC01929	1	RUNX1
LINC00667 LINC01882 LINC02979	3	PHF20 SREBF2 MAZ
LINC00667 LINC01900 LINC01909	1	HMG20B
LINC00667 LINC01909 LINC01910	1	TFE3
LINC00667 LINC01910 LINC02565	1	KAT7
LINC00667 LINC02565 LINC03110	1	AHR
LINC01255 LINC01895 LINC01909	1	NFE2L2
LINC01255 LINC01900 LINC01909	1	THRB
LINC01255 LINC01909 LINC01910	1	CHD4
LINC01255 LINC01909 LINC02565	2	MIER2 STAT3
LINC01255 LINC01909 LINC02856	1	JUN
LINC01415 LINC01630 LINC01929	2	ZSCAN23 ZNF639
LINC01415 LINC01895 LINC01929	1	GFI1B
LINC01415 LINC01929 LINC03035	1	USF1
LINC01415 LINC01929 LINC02565	1	CBX8
LINC01415 LINC01929 LINC02856	2	INSM2 BMI1
LINC01415 LINC01929 LINC02958	1	DIDO1
LINC01416 LINC01882 LINC02979	1	NONO
LINC01416 LINC01910 LINC03110	1	LEF1
LINC01630 LINC01882 LINC02979	1	OVOL3
LINC01630 LINC01895 LINC03110	1	ETV6
LINC01630 LINC02565 LINC03035	1	ZNF776
LINC01882 LINC02979 LINC03110	2	CBFB SIN3B
LINC01895 LINC01909 LINC03110	1	NFE2
LINC01895 LINC02958 LINC03035	1	MEF2D
LINC01900 LINC01909 LINC01910	3	RCOR2 HNF1A NFIA
LINC00470 LINC03035	1	ZBTB5
LINC00470 LINC00667	2	MIER1 KDM4B
LINC00470 LINC01894	1	ZNF512
LINC00470 LINC01910	1	PHB2
LINC00526 LINC02958	1	ZNF146
LINC00667 LINC03110	2	E2F4 U2AF1
LINC00667 LINC01255	1	BRCA1
LINC00667 LINC01416	1	RLF
LINC00667 LINC01630	1	ZBTB7A
LINC00667 LINC01909	3	RBM22 ZMYM3 ZNF652
LINC00667 LINC02565	1	CHD1
LINC00667 LINC02958	1	EHMT2
LINC01255 LINC01900	1	HHEX
LINC01255 LINC01909	1	SMARCC2
LINC01415 LINC01929	11	TSHZ1 ZNF518A SNIP1 ZNF16 ZNF513 ZHX1 ELF4 NFATC3 ARID2 CBX2 ZNF169
LINC01630 LINC01909	1	DNMT3B
LINC01630 LINC02565	2	NFYC DDX20
LINC01882 LINC02979	9	YBX1 ZNF548 HNRNPH1 ELK1 NFATC1 MXD4 BCL11B ZBED1 GMEB2
LINC01895 LINC03035	1	USF2
LINC01901 LINC01902	3	ZNF768 ZNF211 KDM5A
LINC01909 LINC03110	1	PHF21A
LINC01910 LINC02837	1	MYNN
LINC01910 LINC02856	1	DACH1
LINC01910 LINC02958	1	STAT5A
LINC03110	3	IRF5 KLF5 ZNF350
LINC00470	6	THRAP3 NCOA2 ZNF354B ZZZ3 CSDE1 ZNF318
LINC00526	8	ZNF837 ZNF701 ZNF157 CBLL2 ZNF23 ZNF223 ZNF547 GLI4
LINC00667	4	MYRF HES1 ZKSCAN1 ZNF3
LINC01255	3	NCOA3 DEK ESRRA
LINC01387	1	TEAD2
LINC01630	2	U2AF2 ZNF488
LINC01895	1	RBBP5
LINC01909	4	KLF11 NFKBIZ RFXANK KAT2B
LINC01910	2	TBX3 ZNF7
LINC02565	4	ZNF585B ZNF202 IRF3 ZNF133
LINC02856	1	MCM7
LINC02864	1	IRF9
