# Supplementary material for: Long Intergenic Non-Coding RNAs of Human Chromosome 18: Focus on Cancers
Source: Biomedicines. 2024 Feb 28;12(3):544. doi: 10.3390/biomedicines12030544 (PMC10968066; doi:10.3390/biomedicines12030544)
Supplement: Supplementary file 1 [file biomedicines-12-00544-s001.zip › Table_S10_Ershov.xlsx]

## Sheet: miR-prediction
Table S10. Predicted microRNAs interacting with lincRNAs of human chromosome 18 (according to miRDB database)
LINC00305	LINC00470	LINC00526	LINC00667	LINC00668	LINC00907	LINC01254	LINC01255	LINC01387	LINC01415	LINC01416	LINC01443	LINC01444	LINC01477	LINC01478	LINC01538	LINC01539	LINC01541	LINC01543	LINC01544	LINC01601	LINC01630	LINC01882	LINC01887	LINC01892	LINC01894	LINC01895	LINC01897	LINC01899	LINC01900	LINC01901	LINC01902	LINC01903	LINC01904	LINC01905	LINC01906	LINC01908	LINC01909	LINC01910	LINC01912	LINC01915	LINC01916	LINC01917	LINC01919	LINC01922	LINC01924	LINC01925	LINC01926	LINC01928	LINC01929
hsa-miR-513a-5p	hsa-miR-1281	hsa-miR-4738-3p	hsa-miR-8485	hsa-miR-6878-5p	hsa-miR-670-3p	hsa-miR-607	hsa-miR-135b-3p	hsa-miR-3190-5p	hsa-miR-7110-3p	hsa-miR-580-5p	hsa-miR-5196-3p	hsa-miR-3156-5p	hsa-miR-5681a	hsa-miR-455-3p	hsa-miR-7113-5p	hsa-miR-892c-5p	hsa-miR-6867-5p	hsa-miR-1913	hsa-miR-6077	hsa-miR-9985	hsa-miR-670-3p	hsa-miR-4756-3p	hsa-miR-138-5p	hsa-miR-4796-3p	hsa-miR-558	hsa-miR-9903	hsa-miR-6885-5p	hsa-miR-6877-3p	hsa-miR-194-5p	hsa-miR-19b-3p	hsa-miR-8068	hsa-miR-6841-3p	hsa-miR-7856-5p	hsa-miR-6817-5p	hsa-miR-3691-3p	hsa-miR-4653-5p	hsa-miR-4430	hsa-miR-5009-5p	hsa-miR-211-5p	hsa-miR-3182	hsa-miR-4682	hsa-miR-1827	hsa-miR-6785-3p	hsa-miR-375-3p	hsa-miR-4303	hsa-miR-4456	hsa-miR-4531	hsa-miR-8068	hsa-miR-3148
hsa-miR-6074	hsa-miR-153-5p	hsa-miR-4707-3p	hsa-miR-1911-5p	hsa-miR-6871-5p	hsa-miR-6800-3p	hsa-miR-377-3p	hsa-miR-135a-2-3p	hsa-miR-4452	hsa-miR-5692c	hsa-miR-5584-3p	hsa-miR-3152-3p	hsa-miR-8052	hsa-miR-2115-3p	hsa-miR-7106-5p	hsa-miR-4307	hsa-miR-6515-3p	hsa-miR-6865-5p	hsa-miR-10395-5p	hsa-miR-4480	hsa-miR-27b-3p	hsa-miR-4477b	hsa-miR-6809-3p	hsa-miR-4738-3p	hsa-miR-7856-5p	hsa-miR-9718	hsa-miR-12115	hsa-miR-328-5p	hsa-miR-6819-3p	hsa-miR-4481	hsa-miR-19a-3p	hsa-miR-5196-5p	hsa-miR-125a-3p	hsa-miR-7705	hsa-miR-4769-3p	hsa-miR-4291	hsa-miR-3921	hsa-miR-3652	hsa-miR-8058	hsa-miR-204-5p	hsa-miR-95-5p	hsa-miR-589-3p	hsa-miR-6875-3p	hsa-miR-3680-3p	hsa-miR-1245b-3p	hsa-miR-31-3p	hsa-miR-4299	hsa-miR-432-5p	hsa-miR-1303	hsa-miR-4640-5p
hsa-miR-942-5p	hsa-miR-2116-3p	hsa-miR-4443	hsa-miR-4492	hsa-miR-6836-3p	hsa-miR-4695-5p	hsa-miR-3125	hsa-miR-6830-5p	hsa-miR-6754-3p	hsa-miR-5692b	hsa-miR-6513-3p	hsa-miR-4696	hsa-miR-3199	hsa-miR-4713-5p	hsa-miR-6783-5p	hsa-miR-302c-5p	hsa-miR-891b	hsa-miR-6815-5p	hsa-miR-5699-5p	hsa-miR-5690	hsa-miR-27a-3p	hsa-miR-6740-3p	hsa-miR-4644	hsa-miR-24-3p	hsa-miR-764	hsa-miR-628-5p	hsa-miR-4499	hsa-miR-1246	hsa-miR-539-3p	hsa-miR-760	hsa-miR-6757-5p	hsa-miR-4747-5p	hsa-miR-1182	hsa-miR-124-5p	hsa-miR-4727-5p	hsa-miR-4251	hsa-miR-593-3p	hsa-miR-3160-5p	hsa-miR-6828-3p	hsa-miR-205-5p	hsa-miR-92b-3p	hsa-miR-590-3p	hsa-miR-5581-3p	hsa-miR-4799-5p	hsa-miR-4524a-3p	hsa-miR-12119	hsa-miR-5193	hsa-miR-3664-3p	hsa-miR-488-5p	hsa-miR-152-3p
hsa-miR-6750-3p	hsa-miR-3605-5p	hsa-miR-1288-3p	hsa-miR-4498	hsa-miR-6818-3p	hsa-miR-1236-3p	hsa-miR-6781-3p	hsa-miR-4326	hsa-miR-412-3p	hsa-miR-1255b-2-3p	hsa-miR-3119	hsa-miR-759		hsa-miR-5701	hsa-miR-3919	hsa-miR-3685	hsa-miR-6875-3p	hsa-miR-943	hsa-miR-3182	hsa-miR-6891-3p	hsa-miR-3680-3p	hsa-miR-6508-5p	hsa-miR-4306	hsa-miR-510-3p	hsa-miR-4477b	hsa-miR-5010-3p	hsa-miR-6865-5p	hsa-miR-7161-5p	hsa-miR-485-3p	hsa-miR-411-3p	hsa-miR-654-3p	hsa-miR-7515	hsa-miR-19b-3p	hsa-miR-668-3p	hsa-miR-6738-3p	hsa-miR-671-5p	hsa-miR-4251	hsa-miR-3148	hsa-miR-651-3p	hsa-miR-4729	hsa-miR-92a-3p	hsa-miR-875-5p	hsa-miR-517-5p	hsa-miR-3163	hsa-miR-4522	hsa-miR-6867-5p	hsa-miR-6861-3p		hsa-miR-6778-5p	hsa-miR-148b-3p
hsa-miR-33a-3p	hsa-miR-3658	hsa-miR-3714	hsa-miR-4700-5p	hsa-miR-4674	hsa-miR-6817-5p	hsa-miR-6888-5p	hsa-miR-3690	hsa-miR-1266-3p	hsa-miR-6507-5p	hsa-miR-4724-3p	hsa-miR-3972		hsa-miR-8060	hsa-miR-6882-5p	hsa-miR-4693-5p	hsa-miR-3148	hsa-miR-6715b-3p	hsa-miR-4293	hsa-miR-6072	hsa-miR-3184-3p	hsa-miR-4428	hsa-miR-7153-5p	hsa-miR-8076	hsa-miR-22-3p	hsa-miR-6847-3p	hsa-miR-6815-5p	hsa-miR-4310	hsa-miR-6839-3p	hsa-miR-379-3p		hsa-miR-630	hsa-miR-19a-3p	hsa-miR-6781-3p	hsa-miR-6844	hsa-miR-7844-5p	hsa-miR-1250-5p	hsa-miR-2392	hsa-miR-514b-5p	hsa-miR-153-5p	hsa-miR-32-5p	hsa-miR-518c-5p	hsa-miR-659-3p	hsa-miR-12136	hsa-miR-516b-5p	hsa-miR-135a-3p	hsa-miR-6880-5p		hsa-miR-1233-5p	hsa-miR-148a-3p
hsa-miR-3190-5p	hsa-miR-4266	hsa-miR-655-3p	hsa-miR-4726-3p	hsa-miR-10400-3p	hsa-miR-4769-3p	hsa-miR-3189-5p	hsa-miR-561-5p		hsa-miR-6873-3p	hsa-miR-4668-5p	hsa-miR-1202		hsa-miR-4652-3p	hsa-miR-3662	hsa-miR-155-3p	hsa-miR-549a-5p	hsa-miR-6874-5p		hsa-miR-520b-5p	hsa-miR-6865-5p	hsa-miR-17-3p	hsa-miR-146b-5p	hsa-miR-6722-3p	hsa-miR-138-2-3p	hsa-miR-4742-3p		hsa-miR-5193	hsa-miR-335-3p	hsa-miR-4745-5p		hsa-miR-6873-3p	hsa-miR-198	hsa-miR-2467-5p	hsa-miR-4326	hsa-miR-6508-3p	hsa-miR-4288	hsa-miR-7110-3p	hsa-miR-513c-5p	hsa-miR-4496	hsa-miR-367-3p	hsa-miR-5696	hsa-miR-298			hsa-miR-4483	hsa-miR-7978		hsa-miR-1291	hsa-miR-3942-3p
	hsa-miR-4276	hsa-miR-374c-5p	hsa-miR-4775	hsa-miR-4261	hsa-miR-539-5p		hsa-miR-3682-3p		hsa-miR-3143	hsa-miR-1283	hsa-miR-6818-3p		hsa-miR-1323	hsa-miR-3202	hsa-miR-33a-3p	hsa-miR-4691-5p	hsa-miR-208b-5p		hsa-miR-519a-2-5p	hsa-miR-6815-5p	hsa-miR-8067	hsa-miR-146a-5p	hsa-miR-219a-2-3p	hsa-miR-5584-5p	hsa-miR-2276-3p		hsa-miR-486-3p	hsa-miR-1976			hsa-miR-3154	hsa-miR-510-3p	hsa-miR-6753-5p	hsa-miR-6782-3p	hsa-miR-6088	hsa-miR-4309	hsa-miR-4523	hsa-miR-12132	hsa-miR-493-3p	hsa-miR-363-3p	hsa-miR-664a-3p	hsa-miR-6754-3p			hsa-miR-1293	hsa-miR-548q		hsa-miR-4686	hsa-miR-5100
	hsa-miR-4654		hsa-miR-4789-5p	hsa-miR-520b-5p	hsa-miR-4324		hsa-miR-4777-5p		hsa-miR-3913-3p	hsa-miR-4493	hsa-miR-4302		hsa-miR-1972	hsa-miR-664b-3p	hsa-miR-548t-3p	hsa-miR-4786-3p	hsa-miR-208a-5p		hsa-miR-6781-3p	hsa-miR-9902	hsa-miR-4677-5p	hsa-miR-4446-5p	hsa-miR-504-3p	hsa-miR-580-3p	hsa-miR-544a		hsa-miR-548u	hsa-miR-10523-5p			hsa-miR-6882-3p	hsa-miR-502-5p	hsa-miR-2682-3p	hsa-miR-6869-5p	hsa-miR-4770	hsa-miR-3198	hsa-miR-8079	hsa-miR-3140-5p	hsa-miR-6846-3p	hsa-miR-25-3p	hsa-miR-4477a	hsa-miR-412-3p			hsa-miR-590-3p	hsa-miR-4667-3p		hsa-miR-122b-5p	hsa-miR-4666b
	hsa-miR-4711-3p		hsa-miR-5001-5p	hsa-miR-519a-2-5p	hsa-miR-2861				hsa-miR-6852-3p	hsa-miR-1200	hsa-miR-4469		hsa-miR-8068	hsa-miR-579-3p	hsa-miR-548ap-3p	hsa-miR-6815-3p	hsa-miR-4666a-3p		hsa-miR-6873-5p	hsa-miR-3684	hsa-miR-3124-3p		hsa-miR-5692a	hsa-miR-526b-5p	hsa-miR-3065-3p			hsa-miR-3161			hsa-miR-3664-3p	hsa-miR-4775	hsa-miR-4784	hsa-miR-516b-5p	hsa-miR-143-3p	hsa-miR-10526-3p	hsa-miR-1245a	hsa-miR-3976	hsa-miR-134-3p	hsa-miR-4649-3p	hsa-miR-944	hsa-miR-3691-5p			hsa-miR-6748-5p	hsa-miR-6830-3p		hsa-miR-6775-3p	hsa-miR-570-3p
	hsa-miR-4713-5p		hsa-miR-6778-3p	hsa-miR-3175	hsa-miR-8087				hsa-miR-197-5p	hsa-miR-3928-5p	hsa-miR-6829-5p		hsa-miR-4728-3p	hsa-miR-6824-5p	hsa-miR-548aa	hsa-miR-875-3p	hsa-miR-3934-5p		hsa-miR-6854-5p	hsa-miR-186-3p	hsa-miR-5699-3p		hsa-miR-514b-3p	hsa-miR-3162-5p	hsa-miR-4529-3p			hsa-miR-4456			hsa-miR-19b-2-5p	hsa-miR-548at-5p	hsa-miR-3150b-3p	hsa-miR-10393-5p	hsa-miR-6890-3p	hsa-miR-3667-3p	hsa-miR-6766-3p	hsa-miR-122-5p	hsa-miR-4714-5p	hsa-miR-1197	hsa-miR-4775	hsa-miR-5194			hsa-miR-6738-3p			hsa-miR-4254	hsa-miR-5196-3p
	hsa-miR-4769-5p		hsa-miR-6817-3p		hsa-miR-1827				hsa-miR-7161-5p	hsa-miR-4765	hsa-miR-3613-3p		hsa-miR-361-5p	hsa-miR-3688-3p	hsa-miR-325	hsa-miR-1299	hsa-miR-5011-5p		hsa-miR-10527-5p	hsa-miR-4775			hsa-miR-514a-3p	hsa-miR-3116	hsa-miR-29b-1-5p						hsa-miR-19b-1-5p	hsa-miR-335-3p	hsa-miR-545-5p		hsa-miR-670-3p	hsa-miR-3675-3p	hsa-miR-4782-3p	hsa-miR-222-3p	hsa-miR-889-5p	hsa-miR-217-5p	hsa-miR-4424	hsa-miR-193b-5p			hsa-miR-6776-5p			hsa-miR-4693-5p	hsa-miR-4772-5p
	hsa-miR-4778-3p		hsa-miR-6830-5p		hsa-miR-3612				hsa-miR-3132	hsa-miR-1253	hsa-miR-5692a		hsa-miR-548o-3p	hsa-miR-591	hsa-miR-3662	hsa-miR-938	hsa-miR-190a-3p		hsa-miR-6764-5p	hsa-miR-335-3p			hsa-miR-3688-3p	hsa-miR-8068	hsa-miR-28-3p						hsa-miR-19a-5p	hsa-miR-4740-5p			hsa-miR-6739-3p	hsa-miR-632	hsa-miR-219a-5p	hsa-miR-221-3p	hsa-miR-495-3p	hsa-miR-567	hsa-miR-12123	hsa-miR-6844			hsa-miR-4735-5p				hsa-miR-2054
	hsa-miR-4795-5p		hsa-miR-6836-3p		hsa-miR-5006-5p				hsa-miR-599	hsa-miR-9-5p			hsa-miR-4297	hsa-miR-5010-3p	hsa-miR-380-5p	hsa-miR-8081	hsa-miR-4251		hsa-miR-3934-3p	hsa-miR-6501-5p			hsa-miR-4452	hsa-miR-5007-5p							hsa-miR-20a-5p	hsa-miR-369-3p					hsa-miR-6836-3p	hsa-miR-3202	hsa-miR-4659b-3p	hsa-miR-6807-3p	hsa-miR-2681-5p	hsa-miR-629-5p			hsa-miR-576-5p				hsa-miR-4726-5p
	hsa-miR-498-5p		hsa-miR-7110-3p						hsa-miR-5587-3p	hsa-miR-298			hsa-miR-1298-5p	hsa-miR-7845-5p	hsa-miR-497-3p	hsa-miR-3140-5p	hsa-miR-3942-3p			hsa-miR-8070			hsa-miR-1909-3p	hsa-miR-5697							hsa-miR-106b-5p	hsa-miR-491-5p					hsa-miR-759	hsa-miR-4762-3p	hsa-miR-4659a-3p	hsa-miR-6719-3p	hsa-miR-1252-5p	hsa-miR-6744-3p			hsa-miR-6874-3p				hsa-miR-4531
	hsa-miR-501-5p		hsa-miR-762						hsa-miR-548u	hsa-miR-4705			hsa-miR-6885-3p	hsa-miR-5787	hsa-miR-4703-3p	hsa-miR-3674	hsa-miR-2681-5p			hsa-miR-96-3p			hsa-miR-526b-5p	hsa-miR-431-5p							hsa-miR-664a-3p	hsa-miR-625-5p					hsa-miR-95-5p		hsa-miR-5688	hsa-miR-6833-3p	hsa-miR-93-3p	hsa-miR-4757-5p			hsa-miR-148b-5p				hsa-miR-4460
	hsa-miR-541-3p		hsa-miR-8069						hsa-miR-1277-5p	hsa-miR-5584-5p			hsa-miR-4516	hsa-miR-4505	hsa-miR-563	hsa-miR-1267	hsa-miR-532-5p						hsa-miR-4427	hsa-miR-6826-5p							hsa-miR-3136-5p	hsa-miR-6829-3p					hsa-miR-6736-3p		hsa-miR-5692a	hsa-miR-875-3p	hsa-miR-578				hsa-miR-335-3p				hsa-miR-19b-2-5p
	hsa-miR-5689		hsa-miR-8076						hsa-miR-4328	hsa-miR-6806-3p				hsa-miR-4695-5p	hsa-miR-548x-3p	hsa-miR-597-3p	hsa-miR-205-3p						hsa-miR-7151-3p								hsa-miR-1299	hsa-miR-6791-3p							hsa-miR-5006-3p	hsa-miR-3974	hsa-miR-513a-5p				hsa-miR-8054				hsa-miR-19b-1-5p
	hsa-miR-586								hsa-miR-5571-5p	hsa-miR-374a-3p				hsa-miR-8076	hsa-miR-548aj-3p	hsa-miR-6792-3p	hsa-miR-6820-3p						hsa-miR-7110-5p								hsa-miR-2052	hsa-miR-380-3p							hsa-miR-4755-5p	hsa-miR-5006-5p	hsa-miR-4650-5p				hsa-miR-548k				hsa-miR-19a-5p
	hsa-miR-651-3p								hsa-miR-7154-5p	hsa-miR-3177-5p				hsa-miR-6811-3p	hsa-miR-4709-5p	hsa-miR-4659b-3p	hsa-miR-3164						hsa-miR-6842-5p								hsa-miR-526b-3p	hsa-miR-10523-5p							hsa-miR-1253	hsa-miR-4310	hsa-miR-1250-3p				hsa-miR-548av-5p				hsa-miR-4524a-3p
	hsa-miR-654-5p								hsa-miR-6515-3p	hsa-miR-4303				hsa-miR-4660	hsa-miR-3145-3p	hsa-miR-4659a-3p	hsa-miR-1245b-3p						hsa-miR-380-3p								hsa-miR-106a-5p	hsa-miR-590-3p							hsa-miR-4778-3p	hsa-miR-548f-3p	hsa-miR-4311				hsa-miR-2114-5p				hsa-miR-942-5p
	hsa-miR-675-3p								hsa-miR-4254	hsa-miR-3919				hsa-miR-4276	hsa-miR-522-3p		hsa-miR-5002-5p						hsa-miR-6752-5p								hsa-miR-93-5p	hsa-miR-7114-5p							hsa-miR-452-3p	hsa-miR-548e-3p					hsa-miR-3177-5p				hsa-miR-1245b-3p
	hsa-miR-6844								hsa-miR-330-3p	hsa-miR-361-5p				hsa-miR-498-5p	hsa-miR-4694-3p		hsa-miR-2054						hsa-miR-4659b-3p								hsa-miR-519d-3p	hsa-miR-6780a-5p								hsa-miR-548bc					hsa-miR-622				hsa-miR-3680-3p
	hsa-miR-6884-3p								hsa-miR-573	hsa-miR-3127-3p				hsa-miR-1265	hsa-miR-1185-2-3p		hsa-miR-200b-5p						hsa-miR-4659a-3p								hsa-miR-20b-5p	hsa-miR-548aw								hsa-miR-548az-3p					hsa-miR-6501-5p				hsa-miR-4282
	hsa-miR-6894-5p								hsa-miR-3616-5p	hsa-miR-548g-3p				hsa-miR-587	hsa-miR-1185-1-3p		hsa-miR-200a-5p						hsa-miR-7854-3p								hsa-miR-17-5p	hsa-miR-3914								hsa-miR-548ar-3p					hsa-miR-4673
	hsa-miR-7150								hsa-miR-3148					hsa-miR-6077	hsa-let-7f-2-3p		hsa-miR-3972														hsa-miR-6729-3p	hsa-miR-6885-3p								hsa-miR-548a-3p
	hsa-miR-8075								hsa-miR-1237-3p					hsa-miR-3123	hsa-miR-548j-3p		hsa-miR-1202														hsa-miR-1208	hsa-miR-153-3p								hsa-miR-340-5p
									hsa-miR-5193					hsa-miR-3646	hsa-miR-548aq-3p		hsa-miR-1277-5p														hsa-miR-10395-3p									hsa-miR-502-5p
									hsa-miR-216b-5p						hsa-miR-548am-3p		hsa-miR-3924														hsa-miR-670-3p									hsa-miR-4433b-5p
									hsa-miR-6817-3p						hsa-miR-548ah-3p		hsa-miR-3611														hsa-miR-4439									hsa-miR-4768-5p
									hsa-miR-6728-3p						hsa-miR-548ae-3p		hsa-miR-758-3p														hsa-miR-126-5p									hsa-miR-766-3p
									hsa-miR-5583-5p						hsa-miR-670-3p		hsa-miR-513c-3p														hsa-miR-195-5p
									hsa-miR-3129-3p						hsa-miR-382-3p		hsa-miR-513a-3p														hsa-miR-16-5p
									hsa-miR-3909						hsa-miR-224-3p		hsa-miR-4663														hsa-miR-15b-5p
									hsa-miR-1279						hsa-miR-1279		hsa-miR-576-3p														hsa-miR-15a-5p
									hsa-miR-372-5p						hsa-miR-12136		hsa-miR-5047														hsa-miR-4728-5p
									hsa-miR-1299						hsa-miR-5000-3p		hsa-miR-1301-3p														hsa-miR-545-5p
									hsa-miR-6739-3p						hsa-miR-590-3p		hsa-miR-30e-3p														hsa-miR-943
									hsa-miR-222-5p								hsa-miR-30d-3p														hsa-miR-3922-5p
									hsa-miR-8054								hsa-miR-30a-3p
									hsa-miR-548k								hsa-miR-4671-3p
									hsa-miR-548av-5p								hsa-miR-3201
									hsa-miR-193b-5p								hsa-miR-6832-3p
																	hsa-miR-3658
																	hsa-miR-4633-5p
																	hsa-miR-4776-3p
																	hsa-miR-3120-5p
[truncated: 15 more columns]

## Sheet: Total list of predicted miRs
A total list of predicted microRNAs interacting with lincRNAs of human chromosome 18 using miRDB database
LINC00305	hsa-miR-513a-5p
LINC00305	hsa-miR-6074
LINC00305	hsa-miR-942-5p
LINC00305	hsa-miR-6750-3p
LINC00305	hsa-miR-33a-3p
LINC00305	hsa-miR-3190-5p
LINC00470	hsa-miR-1281
LINC00470	hsa-miR-153-5p
LINC00470	hsa-miR-2116-3p
LINC00470	hsa-miR-3605-5p
LINC00470	hsa-miR-3658
LINC00470	hsa-miR-4266
LINC00470	hsa-miR-4276
LINC00470	hsa-miR-4654
LINC00470	hsa-miR-4711-3p
LINC00470	hsa-miR-4713-5p
LINC00470	hsa-miR-4769-5p
LINC00470	hsa-miR-4778-3p
LINC00470	hsa-miR-4795-5p
LINC00470	hsa-miR-498-5p
LINC00470	hsa-miR-501-5p
LINC00470	hsa-miR-541-3p
LINC00470	hsa-miR-5689
LINC00470	hsa-miR-586
LINC00470	hsa-miR-651-3p
LINC00470	hsa-miR-654-5p
LINC00470	hsa-miR-675-3p
LINC00470	hsa-miR-6844
LINC00470	hsa-miR-6884-3p
LINC00470	hsa-miR-6894-5p
LINC00470	hsa-miR-7150
LINC00470	hsa-miR-8075
LINC00526	hsa-miR-4738-3p
LINC00526	hsa-miR-4707-3p
LINC00526	hsa-miR-4443
LINC00526	hsa-miR-1288-3p
LINC00526	hsa-miR-3714
LINC00526	hsa-miR-655-3p
LINC00526	hsa-miR-374c-5p
LINC00667	hsa-miR-8485
LINC00667	hsa-miR-1911-5p
LINC00667	hsa-miR-4492
LINC00667	hsa-miR-4498
LINC00667	hsa-miR-4700-5p
LINC00667	hsa-miR-4726-3p
LINC00667	hsa-miR-4775
LINC00667	hsa-miR-4789-5p
LINC00667	hsa-miR-5001-5p
LINC00667	hsa-miR-6778-3p
LINC00667	hsa-miR-6817-3p
LINC00667	hsa-miR-6830-5p
LINC00667	hsa-miR-6836-3p
LINC00667	hsa-miR-7110-3p
LINC00667	hsa-miR-762
LINC00667	hsa-miR-8069
LINC00667	hsa-miR-8076
LINC00668	hsa-miR-6878-5p
LINC00668	hsa-miR-6871-5p
LINC00668	hsa-miR-6836-3p
LINC00668	hsa-miR-6818-3p
LINC00668	hsa-miR-4674
LINC00668	hsa-miR-10400-3p
LINC00668	hsa-miR-4261
LINC00668	hsa-miR-520b-5p
LINC00668	hsa-miR-519a-2-5p
LINC00668	hsa-miR-3175
LINC00907	hsa-miR-670-3p
LINC00907	hsa-miR-6800-3p
LINC00907	hsa-miR-4695-5p
LINC00907	hsa-miR-1236-3p
LINC00907	hsa-miR-6817-5p
LINC00907	hsa-miR-4769-3p
LINC00907	hsa-miR-539-5p
LINC00907	hsa-miR-4324
LINC00907	hsa-miR-2861
LINC00907	hsa-miR-8087
LINC00907	hsa-miR-1827
LINC00907	hsa-miR-3612
LINC00907	hsa-miR-5006-5p
LINC01254	hsa-miR-607
LINC01254	hsa-miR-377-3p
LINC01254	hsa-miR-3125
LINC01254	hsa-miR-6781-3p
LINC01254	hsa-miR-6888-5p
LINC01254	hsa-miR-3189-5p
LINC01255	hsa-miR-135b-3p
LINC01255	hsa-miR-135a-2-3p
LINC01255	hsa-miR-6830-5p
LINC01255	hsa-miR-4326
LINC01255	hsa-miR-3690
LINC01255	hsa-miR-561-5p
LINC01255	hsa-miR-3682-3p
LINC01255	hsa-miR-4777-5p
LINC01387	hsa-miR-3190-5p
LINC01387	hsa-miR-4452
LINC01387	hsa-miR-6754-3p
LINC01387	hsa-miR-412-3p
LINC01387	hsa-miR-1266-3p
LINC01415	hsa-miR-7110-3p
LINC01415	hsa-miR-5692c
LINC01415	hsa-miR-5692b
LINC01415	hsa-miR-1255b-2-3p
LINC01415	hsa-miR-6507-5p
LINC01415	hsa-miR-6873-3p
LINC01415	hsa-miR-3143
LINC01415	hsa-miR-3913-3p
LINC01415	hsa-miR-6852-3p
LINC01415	hsa-miR-197-5p
LINC01415	hsa-miR-7161-5p
LINC01415	hsa-miR-3132
LINC01415	hsa-miR-599
LINC01415	hsa-miR-5587-3p
LINC01415	hsa-miR-548u
LINC01415	hsa-miR-1277-5p
LINC01415	hsa-miR-4328
LINC01415	hsa-miR-5571-5p
LINC01415	hsa-miR-7154-5p
LINC01415	hsa-miR-6515-3p
LINC01415	hsa-miR-4254
LINC01415	hsa-miR-330-3p
LINC01415	hsa-miR-573
LINC01415	hsa-miR-3616-5p
LINC01415	hsa-miR-3148
LINC01415	hsa-miR-1237-3p
LINC01415	hsa-miR-5193
LINC01415	hsa-miR-216b-5p
LINC01415	hsa-miR-6817-3p
LINC01415	hsa-miR-6728-3p
LINC01415	hsa-miR-5583-5p
LINC01415	hsa-miR-3129-3p
LINC01415	hsa-miR-3909
LINC01415	hsa-miR-1279
LINC01415	hsa-miR-372-5p
LINC01415	hsa-miR-1299
LINC01415	hsa-miR-6739-3p
LINC01415	hsa-miR-222-5p
LINC01415	hsa-miR-8054
LINC01415	hsa-miR-548k
LINC01415	hsa-miR-548av-5p
LINC01415	hsa-miR-193b-5p
LINC01416	hsa-miR-580-5p
LINC01416	hsa-miR-5584-3p
LINC01416	hsa-miR-6513-3p
LINC01416	hsa-miR-3119
LINC01416	hsa-miR-4724-3p
LINC01416	hsa-miR-4668-5p
LINC01416	hsa-miR-1283
LINC01416	hsa-miR-4493
LINC01416	hsa-miR-1200
LINC01416	hsa-miR-3928-5p
LINC01416	hsa-miR-4765
LINC01416	hsa-miR-1253
LINC01416	hsa-miR-9-5p
LINC01416	hsa-miR-298
LINC01416	hsa-miR-4705
LINC01416	hsa-miR-5584-5p
LINC01416	hsa-miR-6806-3p
LINC01416	hsa-miR-374a-3p
LINC01416	hsa-miR-3177-5p
LINC01416	hsa-miR-4303
LINC01416	hsa-miR-3919
LINC01416	hsa-miR-361-5p
LINC01416	hsa-miR-3127-3p
LINC01416	hsa-miR-548g-3p
LINC01443	hsa-miR-5196-3p
LINC01443	hsa-miR-3152-3p
LINC01443	hsa-miR-4696
LINC01443	hsa-miR-759
LINC01443	hsa-miR-3972
LINC01443	hsa-miR-1202
LINC01443	hsa-miR-6818-3p
LINC01443	hsa-miR-4302
LINC01443	hsa-miR-4469
LINC01443	hsa-miR-6829-5p
LINC01443	hsa-miR-3613-3p
LINC01443	hsa-miR-5692a
LINC01444	hsa-miR-3156-5p
LINC01444	hsa-miR-8052
LINC01444	hsa-miR-3199
LINC01477	hsa-miR-5681a
LINC01477	hsa-miR-2115-3p
LINC01477	hsa-miR-4713-5p
LINC01477	hsa-miR-5701
LINC01477	hsa-miR-8060
LINC01477	hsa-miR-4652-3p
LINC01477	hsa-miR-1323
LINC01477	hsa-miR-1972
LINC01477	hsa-miR-8068
LINC01477	hsa-miR-4728-3p
LINC01477	hsa-miR-361-5p
LINC01477	hsa-miR-548o-3p
LINC01477	hsa-miR-4297
LINC01477	hsa-miR-1298-5p
LINC01477	hsa-miR-6885-3p
LINC01477	hsa-miR-4516
LINC01478	hsa-miR-455-3p
LINC01478	hsa-miR-7106-5p
LINC01478	hsa-miR-6783-5p
LINC01478	hsa-miR-3919
LINC01478	hsa-miR-6882-5p
LINC01478	hsa-miR-3662
LINC01478	hsa-miR-3202
LINC01478	hsa-miR-664b-3p
LINC01478	hsa-miR-579-3p
LINC01478	hsa-miR-6824-5p
LINC01478	hsa-miR-3688-3p
LINC01478	hsa-miR-591
LINC01478	hsa-miR-5010-3p
LINC01478	hsa-miR-7845-5p
LINC01478	hsa-miR-5787
LINC01478	hsa-miR-4505
LINC01478	hsa-miR-4695-5p
LINC01478	hsa-miR-8076
LINC01478	hsa-miR-6811-3p
LINC01478	hsa-miR-4660
LINC01478	hsa-miR-4276
LINC01478	hsa-miR-498-5p
LINC01478	hsa-miR-1265
LINC01478	hsa-miR-587
LINC01478	hsa-miR-6077
LINC01478	hsa-miR-3123
LINC01478	hsa-miR-3646
LINC01538	hsa-miR-7113-5p
LINC01538	hsa-miR-4307
LINC01538	hsa-miR-302c-5p
LINC01538	hsa-miR-3685
LINC01538	hsa-miR-4693-5p
LINC01538	hsa-miR-155-3p
LINC01538	hsa-miR-33a-3p
LINC01538	hsa-miR-548t-3p
LINC01538	hsa-miR-548ap-3p
LINC01538	hsa-miR-548aa
LINC01538	hsa-miR-325
LINC01538	hsa-miR-3662
LINC01538	hsa-miR-380-5p
LINC01538	hsa-miR-497-3p
LINC01538	hsa-miR-4703-3p
LINC01538	hsa-miR-563
LINC01538	hsa-miR-548x-3p
LINC01538	hsa-miR-548aj-3p
LINC01538	hsa-miR-4709-5p
LINC01538	hsa-miR-3145-3p
LINC01538	hsa-miR-522-3p
LINC01538	hsa-miR-4694-3p
LINC01538	hsa-miR-1185-2-3p
LINC01538	hsa-miR-1185-1-3p
LINC01538	hsa-let-7f-2-3p
LINC01538	hsa-miR-548j-3p
LINC01538	hsa-miR-548aq-3p
LINC01538	hsa-miR-548am-3p
LINC01538	hsa-miR-548ah-3p
LINC01538	hsa-miR-548ae-3p
LINC01538	hsa-miR-670-3p
LINC01538	hsa-miR-382-3p
LINC01538	hsa-miR-224-3p
LINC01538	hsa-miR-1279
LINC01538	hsa-miR-12136
LINC01538	hsa-miR-5000-3p
LINC01538	hsa-miR-590-3p
LINC01539	hsa-miR-892c-5p
LINC01539	hsa-miR-6515-3p
LINC01539	hsa-miR-891b
LINC01539	hsa-miR-6875-3p
LINC01539	hsa-miR-3148
LINC01539	hsa-miR-549a-5p
LINC01539	hsa-miR-4691-5p
LINC01539	hsa-miR-4786-3p
LINC01539	hsa-miR-6815-3p
LINC01539	hsa-miR-875-3p
LINC01539	hsa-miR-1299
LINC01539	hsa-miR-938
LINC01539	hsa-miR-8081
LINC01539	hsa-miR-3140-5p
LINC01539	hsa-miR-3674
LINC01539	hsa-miR-1267
LINC01539	hsa-miR-597-3p
LINC01539	hsa-miR-6792-3p
LINC01539	hsa-miR-4659b-3p
LINC01539	hsa-miR-4659a-3p
LINC01541	hsa-miR-6867-5p
LINC01541	hsa-miR-6865-5p
LINC01541	hsa-miR-6815-5p
LINC01541	hsa-miR-943
LINC01541	hsa-miR-6715b-3p
LINC01541	hsa-miR-6874-5p
LINC01541	hsa-miR-208b-5p
LINC01541	hsa-miR-208a-5p
LINC01541	hsa-miR-4666a-3p
LINC01541	hsa-miR-3934-5p
LINC01541	hsa-miR-5011-5p
LINC01541	hsa-miR-190a-3p
LINC01541	hsa-miR-4251
LINC01541	hsa-miR-3942-3p
LINC01541	hsa-miR-2681-5p
LINC01541	hsa-miR-532-5p
LINC01541	hsa-miR-205-3p
LINC01541	hsa-miR-6820-3p
LINC01541	hsa-miR-3164
LINC01541	hsa-miR-1245b-3p
LINC01541	hsa-miR-5002-5p
LINC01541	hsa-miR-2054
LINC01541	hsa-miR-200b-5p
LINC01541	hsa-miR-200a-5p
LINC01541	hsa-miR-3972
LINC01541	hsa-miR-1202
LINC01541	hsa-miR-1277-5p
LINC01541	hsa-miR-3924
LINC01541	hsa-miR-3611
LINC01541	hsa-miR-758-3p
LINC01541	hsa-miR-513c-3p
LINC01541	hsa-miR-513a-3p
LINC01541	hsa-miR-4663
LINC01541	hsa-miR-576-3p
LINC01541	hsa-miR-5047
LINC01541	hsa-miR-1301-3p
LINC01541	hsa-miR-30e-3p
LINC01541	hsa-miR-30d-3p
LINC01541	hsa-miR-30a-3p
LINC01541	hsa-miR-4671-3p
LINC01541	hsa-miR-3201
LINC01541	hsa-miR-6832-3p
LINC01541	hsa-miR-3658
LINC01541	hsa-miR-4633-5p
LINC01541	hsa-miR-4776-3p
LINC01541	hsa-miR-3120-5p
LINC01543	hsa-miR-1913
LINC01543	hsa-miR-10395-5p
LINC01543	hsa-miR-5699-5p
LINC01543	hsa-miR-3182
LINC01543	hsa-miR-4293
LINC01544	hsa-miR-6077
LINC01544	hsa-miR-4480
LINC01544	hsa-miR-5690
LINC01544	hsa-miR-6891-3p
LINC01544	hsa-miR-6072
LINC01544	hsa-miR-520b-5p
LINC01544	hsa-miR-519a-2-5p
LINC01544	hsa-miR-6781-3p
LINC01544	hsa-miR-6873-5p
LINC01544	hsa-miR-6854-5p
LINC01544	hsa-miR-10527-5p
LINC01544	hsa-miR-6764-5p
LINC01544	hsa-miR-3934-3p
LINC01601	hsa-miR-9985
LINC01601	hsa-miR-27b-3p
LINC01601	hsa-miR-27a-3p
LINC01601	hsa-miR-3680-3p
LINC01601	hsa-miR-3184-3p
LINC01601	hsa-miR-6865-5p
LINC01601	hsa-miR-6815-5p
LINC01601	hsa-miR-9902
LINC01601	hsa-miR-3684
LINC01601	hsa-miR-186-3p
LINC01601	hsa-miR-4775
LINC01601	hsa-miR-335-3p
LINC01601	hsa-miR-6501-5p
LINC01601	hsa-miR-8070
LINC01601	hsa-miR-96-3p
LINC01630	hsa-miR-670-3p
LINC01630	hsa-miR-4477b
LINC01630	hsa-miR-6740-3p
LINC01630	hsa-miR-6508-5p
LINC01630	hsa-miR-4428
LINC01630	hsa-miR-17-3p
LINC01630	hsa-miR-8067
LINC01630	hsa-miR-4677-5p
LINC01630	hsa-miR-3124-3p
LINC01630	hsa-miR-5699-3p
LINC01882	hsa-miR-4756-3p
LINC01882	hsa-miR-6809-3p
LINC01882	hsa-miR-4644
LINC01882	hsa-miR-4306
LINC01882	hsa-miR-7153-5p
LINC01882	hsa-miR-146b-5p
LINC01882	hsa-miR-146a-5p
LINC01882	hsa-miR-4446-5p
LINC01887	hsa-miR-138-5p
LINC01887	hsa-miR-4738-3p
LINC01887	hsa-miR-24-3p
LINC01887	hsa-miR-510-3p
LINC01887	hsa-miR-8076
LINC01887	hsa-miR-6722-3p
LINC01887	hsa-miR-219a-2-3p
LINC01887	hsa-miR-504-3p
LINC01887	hsa-miR-5692a
LINC01887	hsa-miR-514b-3p
LINC01887	hsa-miR-514a-3p
LINC01887	hsa-miR-3688-3p
LINC01887	hsa-miR-4452
LINC01887	hsa-miR-1909-3p
LINC01887	hsa-miR-526b-5p
LINC01887	hsa-miR-4427
LINC01887	hsa-miR-7151-3p
LINC01887	hsa-miR-7110-5p
LINC01887	hsa-miR-6842-5p
LINC01887	hsa-miR-380-3p
LINC01887	hsa-miR-6752-5p
LINC01887	hsa-miR-4659b-3p
LINC01887	hsa-miR-4659a-3p
LINC01887	hsa-miR-7854-3p
LINC01892	hsa-miR-4796-3p
LINC01892	hsa-miR-7856-5p
LINC01892	hsa-miR-764
LINC01892	hsa-miR-4477b
LINC01892	hsa-miR-22-3p
LINC01892	hsa-miR-138-2-3p
LINC01892	hsa-miR-5584-5p
LINC01892	hsa-miR-580-3p
LINC01892	hsa-miR-526b-5p
LINC01892	hsa-miR-3162-5p
LINC01892	hsa-miR-3116
LINC01892	hsa-miR-8068
LINC01892	hsa-miR-5007-5p
LINC01892	hsa-miR-5697
LINC01892	hsa-miR-431-5p
LINC01892	hsa-miR-6826-5p
LINC01894	hsa-miR-558
LINC01894	hsa-miR-9718
LINC01894	hsa-miR-628-5p
LINC01894	hsa-miR-5010-3p
LINC01894	hsa-miR-6847-3p
LINC01894	hsa-miR-4742-3p
LINC01894	hsa-miR-2276-3p
LINC01894	hsa-miR-544a
LINC01894	hsa-miR-3065-3p
LINC01894	hsa-miR-4529-3p
LINC01894	hsa-miR-29b-1-5p
LINC01894	hsa-miR-28-3p
LINC01895	hsa-miR-9903
LINC01895	hsa-miR-12115
LINC01895	hsa-miR-4499
LINC01895	hsa-miR-6865-5p
LINC01895	hsa-miR-6815-5p
LINC01897	hsa-miR-6885-5p
LINC01897	hsa-miR-328-5p
LINC01897	hsa-miR-1246
LINC01897	hsa-miR-7161-5p
LINC01897	hsa-miR-4310
LINC01897	hsa-miR-5193
LINC01897	hsa-miR-486-3p
LINC01897	hsa-miR-548u
LINC01899	hsa-miR-6877-3p
LINC01899	hsa-miR-6819-3p
LINC01899	hsa-miR-539-3p
LINC01899	hsa-miR-485-3p
LINC01899	hsa-miR-6839-3p
LINC01899	hsa-miR-335-3p
LINC01899	hsa-miR-1976
LINC01899	hsa-miR-10523-5p
LINC01899	hsa-miR-3161
LINC01899	hsa-miR-4456
LINC01900	hsa-miR-194-5p
LINC01900	hsa-miR-4481
LINC01900	hsa-miR-760
LINC01900	hsa-miR-411-3p
LINC01900	hsa-miR-379-3p
LINC01900	hsa-miR-4745-5p
LINC01901	hsa-miR-19b-3p
LINC01901	hsa-miR-19a-3p
LINC01901	hsa-miR-6757-5p
LINC01901	hsa-miR-654-3p
LINC01902	hsa-miR-8068
LINC01902	hsa-miR-5196-5p
LINC01902	hsa-miR-4747-5p
LINC01902	hsa-miR-7515
LINC01902	hsa-miR-630
LINC01902	hsa-miR-6873-3p
LINC01902	hsa-miR-3154
LINC01902	hsa-miR-6882-3p
LINC01902	hsa-miR-3664-3p
LINC01902	hsa-miR-19b-2-5p
LINC01902	hsa-miR-19b-1-5p
LINC01902	hsa-miR-19a-5p
LINC01902	hsa-miR-20a-5p
LINC01902	hsa-miR-106b-5p
LINC01902	hsa-miR-664a-3p
LINC01902	hsa-miR-3136-5p
LINC01902	hsa-miR-1299
LINC01902	hsa-miR-2052
LINC01902	hsa-miR-526b-3p
LINC01902	hsa-miR-106a-5p
LINC01902	hsa-miR-93-5p
LINC01902	hsa-miR-519d-3p
LINC01902	hsa-miR-20b-5p
LINC01902	hsa-miR-17-5p
LINC01902	hsa-miR-6729-3p
LINC01902	hsa-miR-1208
LINC01902	hsa-miR-10395-3p
LINC01902	hsa-miR-670-3p
LINC01902	hsa-miR-4439
LINC01902	hsa-miR-126-5p
LINC01902	hsa-miR-195-5p
LINC01902	hsa-miR-16-5p
LINC01902	hsa-miR-15b-5p
LINC01902	hsa-miR-15a-5p
LINC01902	hsa-miR-4728-5p
LINC01902	hsa-miR-545-5p
LINC01902	hsa-miR-943
LINC01902	hsa-miR-3922-5p
LINC01903	hsa-miR-6841-3p
LINC01903	hsa-miR-125a-3p
LINC01903	hsa-miR-1182
LINC01903	hsa-miR-19b-3p
LINC01903	hsa-miR-19a-3p
LINC01903	hsa-miR-198
LINC01903	hsa-miR-510-3p
LINC01903	hsa-miR-502-5p
LINC01903	hsa-miR-4775
LINC01903	hsa-miR-548at-5p
LINC01903	hsa-miR-335-3p
LINC01903	hsa-miR-4740-5p
LINC01903	hsa-miR-369-3p
LINC01903	hsa-miR-491-5p
LINC01903	hsa-miR-625-5p
LINC01903	hsa-miR-6829-3p
LINC01903	hsa-miR-6791-3p
LINC01903	hsa-miR-380-3p
LINC01903	hsa-miR-10523-5p
LINC01903	hsa-miR-590-3p
LINC01903	hsa-miR-7114-5p
LINC01903	hsa-miR-6780a-5p
LINC01903	hsa-miR-548aw
LINC01903	hsa-miR-3914
LINC01903	hsa-miR-6885-3p
LINC01903	hsa-miR-153-3p
LINC01904	hsa-miR-7856-5p
LINC01904	hsa-miR-7705
LINC01904	hsa-miR-124-5p
LINC01904	hsa-miR-668-3p
LINC01904	hsa-miR-6781-3p
LINC01904	hsa-miR-2467-5p
LINC01904	hsa-miR-6753-5p
LINC01904	hsa-miR-2682-3p
LINC01904	hsa-miR-4784
LINC01904	hsa-miR-3150b-3p
LINC01904	hsa-miR-545-5p
LINC01905	hsa-miR-6817-5p
LINC01905	hsa-miR-4769-3p
LINC01905	hsa-miR-4727-5p
LINC01905	hsa-miR-6738-3p
LINC01905	hsa-miR-6844
LINC01905	hsa-miR-4326
LINC01905	hsa-miR-6782-3p
LINC01905	hsa-miR-6869-5p
LINC01905	hsa-miR-516b-5p
LINC01905	hsa-miR-10393-5p
LINC01906	hsa-miR-3691-3p
LINC01906	hsa-miR-4291
LINC01906	hsa-miR-4251
LINC01906	hsa-miR-671-5p
LINC01906	hsa-miR-7844-5p
LINC01906	hsa-miR-6508-3p
LINC01906	hsa-miR-6088
LINC01906	hsa-miR-4770
LINC01906	hsa-miR-143-3p
LINC01906	hsa-miR-6890-3p
LINC01906	hsa-miR-670-3p
LINC01906	hsa-miR-6739-3p
LINC01908	hsa-miR-4653-5p
LINC01908	hsa-miR-3921
LINC01908	hsa-miR-593-3p
LINC01908	hsa-miR-4251
LINC01908	hsa-miR-1250-5p
LINC01908	hsa-miR-4288
LINC01908	hsa-miR-4309
LINC01908	hsa-miR-3198
LINC01908	hsa-miR-10526-3p
LINC01908	hsa-miR-3667-3p
LINC01908	hsa-miR-3675-3p
LINC01908	hsa-miR-632
LINC01909	hsa-miR-4430
LINC01909	hsa-miR-3652
LINC01909	hsa-miR-3160-5p
LINC01909	hsa-miR-3148
LINC01909	hsa-miR-2392
LINC01909	hsa-miR-7110-3p
LINC01909	hsa-miR-4523
LINC01909	hsa-miR-8079
LINC01909	hsa-miR-1245a
LINC01909	hsa-miR-6766-3p
LINC01909	hsa-miR-4782-3p
LINC01909	hsa-miR-219a-5p
LINC01909	hsa-miR-6836-3p
LINC01909	hsa-miR-759
LINC01909	hsa-miR-95-5p
LINC01909	hsa-miR-6736-3p
LINC01910	hsa-miR-5009-5p
LINC01910	hsa-miR-8058
LINC01910	hsa-miR-6828-3p
LINC01910	hsa-miR-651-3p
LINC01910	hsa-miR-514b-5p
LINC01910	hsa-miR-513c-5p
LINC01910	hsa-miR-12132
LINC01910	hsa-miR-3140-5p
LINC01910	hsa-miR-3976
LINC01910	hsa-miR-122-5p
LINC01910	hsa-miR-222-3p
LINC01910	hsa-miR-221-3p
LINC01910	hsa-miR-3202
LINC01910	hsa-miR-4762-3p
LINC01912	hsa-miR-211-5p
LINC01912	hsa-miR-204-5p
LINC01912	hsa-miR-205-5p
LINC01912	hsa-miR-4729
LINC01912	hsa-miR-153-5p
LINC01912	hsa-miR-4496
LINC01912	hsa-miR-493-3p
LINC01912	hsa-miR-6846-3p
LINC01912	hsa-miR-134-3p
LINC01912	hsa-miR-4714-5p
LINC01912	hsa-miR-889-5p
LINC01912	hsa-miR-495-3p
LINC01912	hsa-miR-4659b-3p
LINC01912	hsa-miR-4659a-3p
LINC01912	hsa-miR-5688
LINC01912	hsa-miR-5692a
LINC01912	hsa-miR-5006-3p
LINC01912	hsa-miR-4755-5p
LINC01912	hsa-miR-1253
LINC01912	hsa-miR-4778-3p
LINC01912	hsa-miR-452-3p
LINC01915	hsa-miR-3182
LINC01915	hsa-miR-95-5p
LINC01915	hsa-miR-92b-3p
LINC01915	hsa-miR-92a-3p
LINC01915	hsa-miR-32-5p
LINC01915	hsa-miR-367-3p
LINC01915	hsa-miR-363-3p
LINC01915	hsa-miR-25-3p
LINC01915	hsa-miR-4649-3p
LINC01915	hsa-miR-1197
LINC01915	hsa-miR-217-5p
LINC01915	hsa-miR-567
LINC01915	hsa-miR-6807-3p
LINC01915	hsa-miR-6719-3p
LINC01915	hsa-miR-6833-3p
LINC01915	hsa-miR-875-3p
LINC01915	hsa-miR-3974
LINC01915	hsa-miR-5006-5p
LINC01915	hsa-miR-4310
LINC01915	hsa-miR-548f-3p
LINC01915	hsa-miR-548e-3p
LINC01915	hsa-miR-548bc
LINC01915	hsa-miR-548az-3p
LINC01915	hsa-miR-548ar-3p
LINC01915	hsa-miR-548a-3p
LINC01915	hsa-miR-340-5p
LINC01915	hsa-miR-502-5p
LINC01915	hsa-miR-4433b-5p
LINC01915	hsa-miR-4768-5p
LINC01915	hsa-miR-766-3p
LINC01916	hsa-miR-4682
LINC01916	hsa-miR-589-3p
LINC01916	hsa-miR-590-3p
LINC01916	hsa-miR-875-5p
LINC01916	hsa-miR-518c-5p
LINC01916	hsa-miR-5696
LINC01916	hsa-miR-664a-3p
LINC01916	hsa-miR-4477a
LINC01916	hsa-miR-944
LINC01916	hsa-miR-4775
LINC01916	hsa-miR-4424
LINC01916	hsa-miR-12123
LINC01916	hsa-miR-2681-5p
LINC01916	hsa-miR-1252-5p
LINC01916	hsa-miR-93-3p
LINC01916	hsa-miR-578
LINC01916	hsa-miR-513a-5p
LINC01916	hsa-miR-4650-5p
LINC01916	hsa-miR-1250-3p
LINC01916	hsa-miR-4311
LINC01917	hsa-miR-1827
LINC01917	hsa-miR-6875-3p
LINC01917	hsa-miR-5581-3p
LINC01917	hsa-miR-517-5p
LINC01917	hsa-miR-659-3p
LINC01917	hsa-miR-298
LINC01917	hsa-miR-6754-3p
LINC01917	hsa-miR-412-3p
LINC01917	hsa-miR-3691-5p
LINC01917	hsa-miR-5194
LINC01917	hsa-miR-193b-5p
LINC01917	hsa-miR-6844
LINC01917	hsa-miR-629-5p
LINC01917	hsa-miR-6744-3p
LINC01917	hsa-miR-4757-5p
LINC01919	hsa-miR-6785-3p
LINC01919	hsa-miR-3680-3p
LINC01919	hsa-miR-4799-5p
LINC01919	hsa-miR-3163
LINC01919	hsa-miR-12136
LINC01922	hsa-miR-375-3p
LINC01922	hsa-miR-1245b-3p
LINC01922	hsa-miR-4524a-3p
LINC01922	hsa-miR-4522
LINC01922	hsa-miR-516b-5p
LINC01924	hsa-miR-4303
LINC01924	hsa-miR-31-3p
LINC01924	hsa-miR-12119
LINC01924	hsa-miR-6867-5p
LINC01924	hsa-miR-135a-3p
LINC01924	hsa-miR-4483
LINC01924	hsa-miR-1293
LINC01924	hsa-miR-590-3p
LINC01924	hsa-miR-6748-5p
LINC01924	hsa-miR-6738-3p
LINC01924	hsa-miR-6776-5p
LINC01924	hsa-miR-4735-5p
LINC01924	hsa-miR-576-5p
LINC01924	hsa-miR-6874-3p
LINC01924	hsa-miR-148b-5p
LINC01924	hsa-miR-335-3p
LINC01924	hsa-miR-8054
LINC01924	hsa-miR-548k
LINC01924	hsa-miR-548av-5p
LINC01924	hsa-miR-2114-5p
LINC01924	hsa-miR-3177-5p
LINC01924	hsa-miR-622
LINC01924	hsa-miR-6501-5p
LINC01924	hsa-miR-4673
LINC01925	hsa-miR-4456
LINC01925	hsa-miR-4299
LINC01925	hsa-miR-5193
LINC01925	hsa-miR-6861-3p
LINC01925	hsa-miR-6880-5p
LINC01925	hsa-miR-7978
LINC01925	hsa-miR-548q
LINC01925	hsa-miR-4667-3p
LINC01925	hsa-miR-6830-3p
LINC01926	hsa-miR-4531
LINC01926	hsa-miR-432-5p
LINC01926	hsa-miR-3664-3p
LINC01928	hsa-miR-8068
LINC01928	hsa-miR-1303
LINC01928	hsa-miR-488-5p
LINC01928	hsa-miR-6778-5p
LINC01928	hsa-miR-1233-5p
LINC01928	hsa-miR-1291
LINC01928	hsa-miR-4686
LINC01928	hsa-miR-122b-5p
LINC01928	hsa-miR-6775-3p
LINC01928	hsa-miR-4254
LINC01928	hsa-miR-4693-5p
LINC01929	hsa-miR-3148
LINC01929	hsa-miR-4640-5p
LINC01929	hsa-miR-152-3p
LINC01929	hsa-miR-148b-3p
LINC01929	hsa-miR-148a-3p
LINC01929	hsa-miR-3942-3p
LINC01929	hsa-miR-5100
LINC01929	hsa-miR-4666b
LINC01929	hsa-miR-570-3p
LINC01929	hsa-miR-5196-3p
LINC01929	hsa-miR-4772-5p
LINC01929	hsa-miR-2054
LINC01929	hsa-miR-4726-5p
LINC01929	hsa-miR-4531
LINC01929	hsa-miR-4460
LINC01929	hsa-miR-19b-2-5p
LINC01929	hsa-miR-19b-1-5p
LINC01929	hsa-miR-19a-5p
LINC01929	hsa-miR-4524a-3p
LINC01929	hsa-miR-942-5p
LINC01929	hsa-miR-1245b-3p
LINC01929	hsa-miR-3680-3p
LINC01929	hsa-miR-4282
LINC02564	hsa-miR-513b-5p
LINC02564	hsa-miR-3922-5p
LINC02564	hsa-miR-4492
LINC02565	hsa-miR-498-5p
LINC02565	hsa-miR-4299
LINC02565	hsa-miR-5696
LINC02565	hsa-miR-1298-5p
LINC02565	hsa-miR-4318
LINC02565	hsa-miR-6830-3p
LINC02582	hsa-miR-6715b-5p
LINC02582	hsa-miR-4269
LINC02582	hsa-miR-2052
LINC02582	hsa-miR-29a-5p
LINC02582	hsa-miR-451a
LINC02582	hsa-miR-4516
LINC02582	hsa-miR-4653-3p
LINC02582	hsa-miR-5703
LINC02582	hsa-miR-4434
LINC02582	hsa-miR-4687-3p
LINC02582	hsa-miR-4660
LINC02582	hsa-miR-3670
LINC02582	hsa-miR-130b-5p
LINC02582	hsa-miR-5584-3p
LINC02582	hsa-miR-381-3p
LINC02582	hsa-miR-300
LINC02582	hsa-miR-578
LINC02582	hsa-miR-4652-3p
LINC02582	hsa-miR-3177-5p
LINC02837	hsa-miR-616-5p
LINC02837	hsa-miR-373-5p
LINC02837	hsa-miR-371b-5p
LINC02837	hsa-miR-3613-3p
LINC02837	hsa-miR-3194-3p
LINC02837	hsa-miR-6799-5p
LINC02837	hsa-miR-4728-5p
LINC02837	hsa-miR-30e-3p
LINC02837	hsa-miR-30d-3p
LINC02837	hsa-miR-30a-3p
LINC02856	hsa-miR-3664-3p
LINC02856	hsa-miR-3692-5p
LINC02856	hsa-miR-548c-3p
LINC02856	hsa-miR-329-5p
LINC02856	hsa-miR-5094
LINC02856	hsa-miR-3678-3p
LINC02856	hsa-miR-4698
LINC02856	hsa-miR-491-3p
LINC02856	hsa-miR-548t-3p
LINC02856	hsa-miR-548ap-3p
LINC02856	hsa-miR-548aa
LINC02856	hsa-miR-3646
LINC02856	hsa-miR-361-5p
LINC02856	hsa-miR-661
LINC02856	hsa-miR-2115-3p
LINC02856	hsa-miR-4316
LINC02856	hsa-miR-6805-3p
LINC02856	hsa-miR-5691
LINC02856	hsa-miR-8086
LINC02856	hsa-miR-6841-3p
LINC02856	hsa-miR-5584-5p
LINC02856	hsa-miR-1299
LINC02856	hsa-miR-3135a
LINC02864	hsa-miR-3121-5p
LINC02864	hsa-miR-875-3p
LINC02864	hsa-miR-758-3p
LINC02864	hsa-miR-6873-5p
LINC02864	hsa-miR-650
LINC02864	hsa-miR-3612
LINC02864	hsa-miR-3678-3p
LINC02864	hsa-miR-3155b
LINC02864	hsa-miR-3155a
LINC02864	hsa-miR-484
LINC02864	hsa-miR-4443
LINC02864	hsa-miR-2467-3p
LINC02864	hsa-miR-4432
LINC02864	hsa-miR-3121-5p
LINC02864	hsa-miR-875-3p
LINC02864	hsa-miR-758-3p
LINC02864	hsa-miR-6873-5p
LINC02864	hsa-miR-650
LINC02864	hsa-miR-3612
LINC02864	hsa-miR-3678-3p
LINC02864	hsa-miR-3155b
LINC02864	hsa-miR-3155a
LINC02864	hsa-miR-484
LINC02864	hsa-miR-4443
LINC02864	hsa-miR-2467-3p
LINC02864	hsa-miR-4432
LINC02879	hsa-miR-6867-5p
LINC02879	hsa-miR-4531
LINC02879	hsa-miR-554
LINC02879	hsa-miR-4743-3p
LINC02879	hsa-miR-4663
LINC02879	hsa-miR-3646
LINC02879	hsa-miR-4291
LINC02879	hsa-miR-7160-5p
LINC02879	hsa-miR-7159-5p
LINC02879	hsa-miR-6748-5p
LINC02879	hsa-miR-466
LINC02879	hsa-miR-6811-3p
LINC02879	hsa-miR-7153-5p
LINC02879	hsa-miR-6758-5p
LINC02879	hsa-miR-185-3p
LINC02879	hsa-miR-3065-5p
LINC02879	hsa-miR-550a-5p
LINC02879	hsa-miR-550a-3-5p
LINC02879	hsa-miR-1271-3p
LINC02879	hsa-miR-4744
LINC02879	hsa-miR-3157-5p
LINC02958	hsa-miR-4252
LINC02958	hsa-miR-4653-5p
LINC02958	hsa-miR-3921
LINC02958	hsa-miR-876-5p
LINC02958	hsa-miR-4289
LINC02958	hsa-miR-11399
LINC02958	hsa-miR-3167
LINC02958	hsa-miR-627-3p
LINC02958	hsa-miR-5681a
LINC03035	hsa-miR-450b-5p
LINC03035	hsa-miR-552-5p
LINC03035	hsa-miR-3614-5p
LINC03035	hsa-miR-6867-5p
LINC03035	hsa-miR-484
LINC03035	hsa-miR-340-5p
LINC03035	hsa-miR-101-5p
LINC03035	hsa-miR-3155b
LINC03035	hsa-miR-3155a
LINC03035	hsa-miR-6878-5p
LINC03035	hsa-miR-3646
LINC03035	hsa-miR-4668-3p
LINC03035	hsa-miR-5688
LINC03035	hsa-miR-495-3p
LINC03035	hsa-miR-6788-5p
LINC03035	hsa-miR-30c-2-3p
LINC03035	hsa-miR-30c-1-3p
LINC03035	hsa-miR-95-5p
LINC03069	hsa-miR-2392
LINC03069	hsa-miR-371a-5p
LINC03069	hsa-miR-545-5p
LINC03069	hsa-miR-4680-3p
LINC03069	hsa-miR-525-5p
LINC03069	hsa-miR-520a-5p
LINC03069	hsa-miR-3910
LINC03069	hsa-miR-5580-5p
LINC03069	hsa-miR-4328
LINC03069	hsa-miR-3132
LINC03069	hsa-miR-197-5p
LINC03069	hsa-miR-4518
LINC03069	hsa-miR-1266-5p
LINC03092	hsa-miR-3925-5p
LINC03092	hsa-miR-582-5p
LINC03092	hsa-miR-548d-3p
LINC03092	hsa-miR-548z
LINC03092	hsa-miR-548h-3p
LINC03092	hsa-miR-548bb-3p
LINC03092	hsa-miR-548ac
LINC03092	hsa-miR-198
LINC03092	hsa-miR-107
LINC03092	hsa-miR-103a-3p
LINC03092	hsa-miR-4478
LINC03092	hsa-miR-548x-3p
LINC03092	hsa-miR-548aj-3p
LINC03092	hsa-miR-548j-3p
LINC03092	hsa-miR-548aq-3p
LINC03092	hsa-miR-548am-3p
LINC03092	hsa-miR-548ah-3p
LINC03092	hsa-miR-548ae-3p
LINC03092	hsa-miR-519c-3p
LINC03092	hsa-miR-519b-3p
LINC03092	hsa-miR-519a-3p
LINC03092	hsa-miR-1184
LINC03092	hsa-miR-9903
LINC03092	hsa-miR-5589-3p
LINC03092	hsa-miR-4279
LINC03092	hsa-miR-3976
LINC03092	hsa-miR-2116-5p
LINC03092	hsa-miR-3171
LINC03092	hsa-miR-4272
LINC03092	hsa-miR-4330
LINC03092	hsa-miR-548an
LINC03092	hsa-miR-4650-5p
LINC03092	hsa-miR-4540
LINC03092	hsa-miR-98-3p
LINC03092	hsa-let-7f-1-3p
LINC03092	hsa-let-7b-3p
LINC03092	hsa-let-7a-3p
LINC03092	hsa-miR-302e
LINC03092	hsa-miR-580-3p
LINC03092	hsa-miR-224-5p
LINC03092	hsa-miR-3929
LINC03110	hsa-miR-12131
LINC03110	hsa-miR-500a-5p
LINC03110	hsa-miR-190a-3p
LINC03110	hsa-miR-3182
LINC03110	hsa-miR-559
LINC03110	hsa-miR-548y
LINC03110	hsa-miR-548w
LINC03110	hsa-miR-548o-5p
LINC03110	hsa-miR-548j-5p
LINC03110	hsa-miR-548i
LINC03110	hsa-miR-548h-5p
LINC03110	hsa-miR-548d-5p
LINC03110	hsa-miR-548c-5p
LINC03110	hsa-miR-548bb-5p
LINC03110	hsa-miR-548b-5p
LINC03110	hsa-miR-548ay-5p
LINC03110	hsa-miR-548au-5p
LINC03110	hsa-miR-548as-5p
LINC03110	hsa-miR-548ar-5p
LINC03110	hsa-miR-548aq-5p
LINC03110	hsa-miR-548ap-5p
LINC03110	hsa-miR-548am-5p
LINC03110	hsa-miR-548ak
LINC03110	hsa-miR-548ae-5p
LINC03110	hsa-miR-548ad-5p
LINC03110	hsa-miR-548ab
LINC03110	hsa-miR-548a-5p
LINC03110	hsa-miR-10397-3p
LINC03110	hsa-miR-4495
LINC03110	hsa-miR-16-1-3p
LINC03110	hsa-miR-767-3p
LINC03110	hsa-miR-4652-3p
LINC03110	hsa-miR-4524b-3p
LINC03110	hsa-miR-8085
LINC03110	hsa-miR-6731-5p
LINC03110	hsa-miR-892c-3p
LINC03110	hsa-miR-4676-3p
LINC03110	hsa-miR-452-5p
LINC03110	hsa-miR-6763-5p
LINC03110	hsa-miR-3150a-3p
LINC03110	hsa-miR-211-3p
LINC03110	hsa-miR-1178-3p
LINC03111	hsa-miR-515-5p
LINC03111	hsa-miR-519e-5p
LINC03111	hsa-miR-222-3p
LINC03111	hsa-miR-221-3p
LINC03111	hsa-miR-6845-3p
LINC03111	hsa-miR-4764-3p
LINC03111	hsa-miR-4435

## Sheet: Common miRs 
A list of common microRNAs interacting with two and more lincRNAs of human chromosome 18
lincRNA	miR	Tags
LINC03092	hsa-let-7a-3p
LINC03092	hsa-let-7b-3p
LINC03092	hsa-let-7f-1-3p	2
LINC01538	hsa-let-7f-2-3p	2
LINC03035	hsa-miR-101-5p
LINC01905	hsa-miR-10393-5p	3
LINC01902	hsa-miR-10395-3p	3
LINC01543	hsa-miR-10395-5p	3
LINC03110	hsa-miR-10397-3p
LINC03092	hsa-miR-103a-3p
LINC00668	hsa-miR-10400-3p
LINC01899	hsa-miR-10523-5p	2
LINC01903	hsa-miR-10523-5p	2
LINC01908	hsa-miR-10526-3p
LINC01544	hsa-miR-10527-5p
LINC01902	hsa-miR-106a-5p
LINC01902	hsa-miR-106b-5p
LINC03092	hsa-miR-107
LINC02958	hsa-miR-11399
LINC03110	hsa-miR-1178-3p
LINC01903	hsa-miR-1182
LINC03092	hsa-miR-1184
LINC01538	hsa-miR-1185-1-3p	2
LINC01538	hsa-miR-1185-2-3p	2
LINC01915	hsa-miR-1197
LINC01416	hsa-miR-1200
LINC01443	hsa-miR-1202	2
LINC01541	hsa-miR-1202	2
LINC01902	hsa-miR-1208
LINC01895	hsa-miR-12115
LINC01924	hsa-miR-12119
LINC01916	hsa-miR-12123
LINC03110	hsa-miR-12131
LINC01910	hsa-miR-12132
LINC01538	hsa-miR-12136	2
LINC01919	hsa-miR-12136	2
LINC01910	hsa-miR-122-5p
LINC01928	hsa-miR-122b-5p
LINC01928	hsa-miR-1233-5p
LINC00907	hsa-miR-1236-3p
LINC01415	hsa-miR-1237-3p
LINC01909	hsa-miR-1245a
LINC01541	hsa-miR-1245b-3p	3
LINC01922	hsa-miR-1245b-3p	3
LINC01929	hsa-miR-1245b-3p	3
LINC01904	hsa-miR-124-5p
LINC01897	hsa-miR-1246
LINC01916	hsa-miR-1250-3p	2
LINC01908	hsa-miR-1250-5p	2
LINC01916	hsa-miR-1252-5p
LINC01416	hsa-miR-1253	2
LINC01912	hsa-miR-1253	2
LINC01415	hsa-miR-1255b-2-3p
LINC01903	hsa-miR-125a-3p
LINC01478	hsa-miR-1265
LINC01902	hsa-miR-126-5p
LINC01387	hsa-miR-1266-3p	2
LINC03069	hsa-miR-1266-5p	2
LINC01539	hsa-miR-1267
LINC02879	hsa-miR-1271-3p
LINC01415	hsa-miR-1277-5p	2
LINC01541	hsa-miR-1277-5p	2
LINC01415	hsa-miR-1279	2
LINC01538	hsa-miR-1279	2
LINC00470	hsa-miR-1281
LINC01416	hsa-miR-1283
LINC00526	hsa-miR-1288-3p
LINC01928	hsa-miR-1291
LINC01924	hsa-miR-1293
LINC01477	hsa-miR-1298-5p	2
LINC02565	hsa-miR-1298-5p	2
LINC01415	hsa-miR-1299	3
LINC01539	hsa-miR-1299	3
LINC01902	hsa-miR-1299	3
LINC02856	hsa-miR-1299
LINC01541	hsa-miR-1301-3p
LINC01928	hsa-miR-1303
LINC02582	hsa-miR-130b-5p
LINC01477	hsa-miR-1323
LINC01912	hsa-miR-134-3p
LINC01255	hsa-miR-135a-2-3p
LINC01924	hsa-miR-135a-3p
LINC01255	hsa-miR-135b-3p
LINC01892	hsa-miR-138-2-3p
LINC01887	hsa-miR-138-5p
LINC01906	hsa-miR-143-3p
LINC01882	hsa-miR-146a-5p	2
LINC01882	hsa-miR-146b-5p	3
LINC01929	hsa-miR-148a-3p
LINC01929	hsa-miR-148b-3p	2
LINC01924	hsa-miR-148b-5p	2
LINC01929	hsa-miR-152-3p
LINC01903	hsa-miR-153-3p
LINC00470	hsa-miR-153-5p	2
LINC01912	hsa-miR-153-5p	2
LINC01538	hsa-miR-155-3p
LINC01902	hsa-miR-15a-5p
LINC01902	hsa-miR-15b-5p
LINC03110	hsa-miR-16-1-3p
LINC01902	hsa-miR-16-5p
LINC01630	hsa-miR-17-3p
LINC01902	hsa-miR-17-5p
LINC00907	hsa-miR-1827	2
LINC01917	hsa-miR-1827	2
LINC02879	hsa-miR-185-3p
LINC01601	hsa-miR-186-3p
LINC01887	hsa-miR-1909-3p
LINC01541	hsa-miR-190a-3p	2
LINC03110	hsa-miR-190a-3p	2
LINC00667	hsa-miR-1911-5p
LINC01543	hsa-miR-1913
LINC01415	hsa-miR-193b-5p	2
LINC01917	hsa-miR-193b-5p	2
LINC01900	hsa-miR-194-5p
LINC01902	hsa-miR-195-5p
LINC01477	hsa-miR-1972
LINC01415	hsa-miR-197-5p
LINC03069	hsa-miR-197-5p
LINC01899	hsa-miR-1976
LINC01903	hsa-miR-198	2
LINC03092	hsa-miR-198	2
LINC01901	hsa-miR-19a-3p	2
LINC01903	hsa-miR-19a-3p	2
LINC01902	hsa-miR-19a-5p	2
LINC01929	hsa-miR-19a-5p	2
LINC01902	hsa-miR-19b-1-5p	2
LINC01929	hsa-miR-19b-1-5p	2
LINC01902	hsa-miR-19b-2-5p	2
LINC01929	hsa-miR-19b-2-5p	2
LINC01901	hsa-miR-19b-3p	2
LINC01903	hsa-miR-19b-3p	2
LINC01541	hsa-miR-200a-5p
LINC01541	hsa-miR-200b-5p
LINC01912	hsa-miR-204-5p
LINC01902	hsa-miR-2052	2
LINC02582	hsa-miR-2052	2
LINC01541	hsa-miR-205-3p
LINC01541	hsa-miR-2054	2
LINC01929	hsa-miR-2054	2
LINC01912	hsa-miR-205-5p
LINC01541	hsa-miR-208a-5p
LINC01541	hsa-miR-208b-5p
LINC01902	hsa-miR-20a-5p
LINC01902	hsa-miR-20b-5p
LINC03110	hsa-miR-211-3p
LINC01924	hsa-miR-2114-5p
LINC01477	hsa-miR-2115-3p	2
LINC02856	hsa-miR-2115-3p	2
LINC01912	hsa-miR-211-5p
LINC00470	hsa-miR-2116-3p
LINC03092	hsa-miR-2116-5p
LINC01415	hsa-miR-216b-5p
LINC01915	hsa-miR-217-5p
LINC01887	hsa-miR-219a-2-3p
LINC01909	hsa-miR-219a-5p
LINC01910	hsa-miR-221-3p	2
LINC03111	hsa-miR-221-3p	2
LINC01910	hsa-miR-222-3p	2
LINC03111	hsa-miR-222-3p	2
LINC01415	hsa-miR-222-5p
LINC01892	hsa-miR-22-3p
LINC01538	hsa-miR-224-3p
LINC03092	hsa-miR-224-5p
LINC01894	hsa-miR-2276-3p
LINC01909	hsa-miR-2392	2
LINC03069	hsa-miR-2392	2
LINC01887	hsa-miR-24-3p
LINC02864	hsa-miR-2467-3p	2
LINC02864	hsa-miR-2467-3p	2
LINC01904	hsa-miR-2467-5p
LINC01915	hsa-miR-25-3p
LINC01541	hsa-miR-2681-5p	2
LINC01916	hsa-miR-2681-5p	2
LINC01904	hsa-miR-2682-3p
LINC01601	hsa-miR-27a-3p
LINC01601	hsa-miR-27b-3p
LINC01894	hsa-miR-28-3p
LINC00907	hsa-miR-2861
LINC01416	hsa-miR-298	2
LINC01917	hsa-miR-298	2
LINC02582	hsa-miR-29a-5p
LINC01894	hsa-miR-29b-1-5p
LINC02582	hsa-miR-300
LINC01538	hsa-miR-302c-5p
LINC03092	hsa-miR-302e
LINC01894	hsa-miR-3065-3p
LINC02879	hsa-miR-3065-5p
LINC01541	hsa-miR-30a-3p	2
LINC02837	hsa-miR-30a-3p	2
LINC03035	hsa-miR-30c-1-3p
LINC03035	hsa-miR-30c-2-3p
LINC01541	hsa-miR-30d-3p	2
LINC02837	hsa-miR-30d-3p	2
LINC01541	hsa-miR-30e-3p	2
LINC02837	hsa-miR-30e-3p	2
LINC01892	hsa-miR-3116
LINC01416	hsa-miR-3119
LINC01541	hsa-miR-3120-5p
LINC02864	hsa-miR-3121-5p	2
LINC02864	hsa-miR-3121-5p	2
LINC01478	hsa-miR-3123
LINC01630	hsa-miR-3124-3p
LINC01254	hsa-miR-3125
LINC01416	hsa-miR-3127-3p
LINC01415	hsa-miR-3129-3p
LINC01415	hsa-miR-3132	2
LINC03069	hsa-miR-3132	2
LINC02856	hsa-miR-3135a
LINC01902	hsa-miR-3136-5p
LINC01924	hsa-miR-31-3p
LINC01539	hsa-miR-3140-5p	2
LINC01910	hsa-miR-3140-5p	2
LINC01415	hsa-miR-3143
LINC01538	hsa-miR-3145-3p
LINC01415	hsa-miR-3148	4
LINC01539	hsa-miR-3148	4
LINC01909	hsa-miR-3148	4
LINC01929	hsa-miR-3148	4
LINC03110	hsa-miR-3150a-3p
LINC01904	hsa-miR-3150b-3p
LINC01443	hsa-miR-3152-3p
LINC01902	hsa-miR-3154
LINC02864	hsa-miR-3155a	3
LINC02864	hsa-miR-3155a	3
LINC03035	hsa-miR-3155a	3
LINC02864	hsa-miR-3155b	3
LINC02864	hsa-miR-3155b	3
LINC03035	hsa-miR-3155b	3
LINC01444	hsa-miR-3156-5p
LINC02879	hsa-miR-3157-5p
LINC01909	hsa-miR-3160-5p
LINC01899	hsa-miR-3161
LINC01892	hsa-miR-3162-5p
LINC01919	hsa-miR-3163
LINC01541	hsa-miR-3164
LINC02958	hsa-miR-3167
LINC03092	hsa-miR-3171
LINC00668	hsa-miR-3175
LINC01416	hsa-miR-3177-5p	3
LINC01924	hsa-miR-3177-5p	3
LINC02582	hsa-miR-3177-5p	3
LINC01543	hsa-miR-3182	3
LINC01915	hsa-miR-3182	3
LINC03110	hsa-miR-3182	3
LINC01601	hsa-miR-3184-3p
LINC01254	hsa-miR-3189-5p
LINC00305	hsa-miR-3190-5p	2
LINC01387	hsa-miR-3190-5p	2
LINC02837	hsa-miR-3194-3p
LINC01908	hsa-miR-3198
LINC01444	hsa-miR-3199
LINC01541	hsa-miR-3201
LINC01478	hsa-miR-3202	2
LINC01910	hsa-miR-3202	2
LINC01538	hsa-miR-325
LINC01915	hsa-miR-32-5p
LINC01897	hsa-miR-328-5p
LINC02856	hsa-miR-329-5p
LINC01415	hsa-miR-330-3p
LINC01601	hsa-miR-335-3p	4
LINC01899	hsa-miR-335-3p	4
LINC01903	hsa-miR-335-3p	4
LINC01924	hsa-miR-335-3p	4
LINC00305	hsa-miR-33a-3p	2
LINC01538	hsa-miR-33a-3p	2
LINC01915	hsa-miR-340-5p	2
LINC03035	hsa-miR-340-5p	2
LINC00470	hsa-miR-3605-5p
LINC01541	hsa-miR-3611
LINC00907	hsa-miR-3612	3
LINC02864	hsa-miR-3612	3
LINC02864	hsa-miR-3612	3
LINC01443	hsa-miR-3613-3p	2
LINC02837	hsa-miR-3613-3p	2
LINC03035	hsa-miR-3614-5p
LINC01416	hsa-miR-361-5p	2
LINC01477	hsa-miR-361-5p	2
LINC02856	hsa-miR-361-5p
LINC01415	hsa-miR-3616-5p
LINC01915	hsa-miR-363-3p
LINC01478	hsa-miR-3646	4
LINC02856	hsa-miR-3646	4
LINC02879	hsa-miR-3646	4
LINC03035	hsa-miR-3646	4
LINC01909	hsa-miR-3652
LINC00470	hsa-miR-3658	2
LINC01541	hsa-miR-3658	2
LINC01478	hsa-miR-3662	2
LINC01538	hsa-miR-3662	2
LINC01902	hsa-miR-3664-3p	3
LINC01926	hsa-miR-3664-3p	3
LINC02856	hsa-miR-3664-3p	3
LINC01908	hsa-miR-3667-3p
LINC02582	hsa-miR-3670
LINC01915	hsa-miR-367-3p
LINC01539	hsa-miR-3674
LINC01908	hsa-miR-3675-3p
LINC02856	hsa-miR-3678-3p	3
LINC02864	hsa-miR-3678-3p	3
LINC02864	hsa-miR-3678-3p	3
LINC01601	hsa-miR-3680-3p	3
LINC01919	hsa-miR-3680-3p	3
LINC01929	hsa-miR-3680-3p	3
LINC01255	hsa-miR-3682-3p
LINC01601	hsa-miR-3684
LINC01538	hsa-miR-3685
LINC01478	hsa-miR-3688-3p	2
LINC01887	hsa-miR-3688-3p	2
LINC01255	hsa-miR-3690
LINC01906	hsa-miR-3691-3p	2
LINC01917	hsa-miR-3691-5p	2
LINC02856	hsa-miR-3692-5p
LINC01903	hsa-miR-369-3p
LINC00526	hsa-miR-3714
LINC03069	hsa-miR-371a-5p
LINC02837	hsa-miR-371b-5p
LINC01415	hsa-miR-372-5p
LINC02837	hsa-miR-373-5p
LINC01416	hsa-miR-374a-3p
LINC00526	hsa-miR-374c-5p
LINC01922	hsa-miR-375-3p
LINC01254	hsa-miR-377-3p
LINC01900	hsa-miR-379-3p
LINC01887	hsa-miR-380-3p	2
LINC01903	hsa-miR-380-3p	2
LINC01538	hsa-miR-380-5p
LINC02582	hsa-miR-381-3p
LINC01538	hsa-miR-382-3p
LINC01415	hsa-miR-3909
LINC03069	hsa-miR-3910
LINC01415	hsa-miR-3913-3p
LINC01903	hsa-miR-3914
LINC01416	hsa-miR-3919	2
LINC01478	hsa-miR-3919	2
LINC01908	hsa-miR-3921	2
LINC02958	hsa-miR-3921	2
LINC01902	hsa-miR-3922-5p	2
LINC02564	hsa-miR-3922-5p	2
LINC01541	hsa-miR-3924
LINC03092	hsa-miR-3925-5p
LINC01416	hsa-miR-3928-5p
LINC03092	hsa-miR-3929
LINC01544	hsa-miR-3934-3p	2
LINC01541	hsa-miR-3934-5p	2
LINC01541	hsa-miR-3942-3p	2
LINC01929	hsa-miR-3942-3p	2
LINC01443	hsa-miR-3972	2
LINC01541	hsa-miR-3972	2
LINC01915	hsa-miR-3974
LINC01910	hsa-miR-3976	2
LINC03092	hsa-miR-3976	2
LINC01900	hsa-miR-411-3p
LINC01387	hsa-miR-412-3p	2
LINC01917	hsa-miR-412-3p	2
LINC01541	hsa-miR-4251	3
LINC01906	hsa-miR-4251	3
LINC01908	hsa-miR-4251	3
LINC02958	hsa-miR-4252
LINC01415	hsa-miR-4254	2
LINC01928	hsa-miR-4254	2
LINC00668	hsa-miR-4261
LINC00470	hsa-miR-4266
LINC02582	hsa-miR-4269
LINC03092	hsa-miR-4272
LINC00470	hsa-miR-4276	2
LINC01478	hsa-miR-4276	2
LINC03092	hsa-miR-4279
LINC01929	hsa-miR-4282
LINC01908	hsa-miR-4288
LINC02958	hsa-miR-4289
LINC01906	hsa-miR-4291	2
LINC02879	hsa-miR-4291	2
LINC01543	hsa-miR-4293
LINC01477	hsa-miR-4297
LINC01925	hsa-miR-4299	2
LINC02565	hsa-miR-4299	2
LINC01443	hsa-miR-4302
LINC01416	hsa-miR-4303	2
LINC01924	hsa-miR-4303	2
LINC01882	hsa-miR-4306
LINC01538	hsa-miR-4307
LINC01908	hsa-miR-4309
LINC01897	hsa-miR-4310	2
LINC01915	hsa-miR-4310	2
LINC01916	hsa-miR-4311
LINC01892	hsa-miR-431-5p
LINC02856	hsa-miR-4316
LINC02565	hsa-miR-4318
LINC00907	hsa-miR-4324
LINC01926	hsa-miR-432-5p
LINC01255	hsa-miR-4326	2
LINC01905	hsa-miR-4326	2
LINC01415	hsa-miR-4328	2
LINC03069	hsa-miR-4328	2
LINC03092	hsa-miR-4330
LINC01916	hsa-miR-4424
LINC01887	hsa-miR-4427
LINC01630	hsa-miR-4428
LINC01909	hsa-miR-4430
LINC02864	hsa-miR-4432	2
LINC02864	hsa-miR-4432	2
LINC01915	hsa-miR-4433b-5p
LINC02582	hsa-miR-4434
LINC03111	hsa-miR-4435
LINC01902	hsa-miR-4439
LINC00526	hsa-miR-4443	3
LINC02864	hsa-miR-4443	3
LINC02864	hsa-miR-4443	3
LINC01882	hsa-miR-4446-5p
LINC01387	hsa-miR-4452	2
LINC01887	hsa-miR-4452	2
LINC01899	hsa-miR-4456	2
LINC01925	hsa-miR-4456	2
LINC01929	hsa-miR-4460
LINC01443	hsa-miR-4469
LINC01916	hsa-miR-4477a
LINC01630	hsa-miR-4477b	2
LINC01892	hsa-miR-4477b	2
LINC03092	hsa-miR-4478
LINC01544	hsa-miR-4480
LINC01900	hsa-miR-4481
LINC01924	hsa-miR-4483
LINC00667	hsa-miR-4492	2
LINC02564	hsa-miR-4492	2
LINC01416	hsa-miR-4493
LINC03110	hsa-miR-4495
LINC01912	hsa-miR-4496
LINC00667	hsa-miR-4498
LINC01895	hsa-miR-4499
LINC01478	hsa-miR-4505
LINC03035	hsa-miR-450b-5p
LINC01477	hsa-miR-4516	2
LINC02582	hsa-miR-4516	2
LINC03069	hsa-miR-4518
LINC02582	hsa-miR-451a
LINC01922	hsa-miR-4522
LINC01909	hsa-miR-4523
LINC01912	hsa-miR-452-3p
LINC01922	hsa-miR-4524a-3p	2
LINC01929	hsa-miR-4524a-3p	2
LINC03110	hsa-miR-4524b-3p
LINC03110	hsa-miR-452-5p
LINC01894	hsa-miR-4529-3p
LINC01926	hsa-miR-4531	3
LINC01929	hsa-miR-4531	3
LINC02879	hsa-miR-4531	3
LINC03092	hsa-miR-4540
LINC01478	hsa-miR-455-3p
LINC01541	hsa-miR-4633-5p
LINC01929	hsa-miR-4640-5p
LINC01882	hsa-miR-4644
LINC01915	hsa-miR-4649-3p
LINC01916	hsa-miR-4650-5p	2
LINC03092	hsa-miR-4650-5p	2
LINC01477	hsa-miR-4652-3p	3
LINC02582	hsa-miR-4652-3p	3
LINC03110	hsa-miR-4652-3p	3
LINC02582	hsa-miR-4653-3p	3
LINC01908	hsa-miR-4653-5p	3
LINC02958	hsa-miR-4653-5p	3
LINC00470	hsa-miR-4654
LINC01539	hsa-miR-4659a-3p	2
LINC01887	hsa-miR-4659a-3p	2
LINC01912	hsa-miR-4659a-3p	2
LINC01539	hsa-miR-4659b-3p	3
LINC01887	hsa-miR-4659b-3p	3
LINC01912	hsa-miR-4659b-3p	3
LINC02879	hsa-miR-466
LINC01478	hsa-miR-4660	2
LINC02582	hsa-miR-4660	2
LINC01541	hsa-miR-4663	2
LINC02879	hsa-miR-4663	2
LINC01541	hsa-miR-4666a-3p
LINC01929	hsa-miR-4666b
LINC01925	hsa-miR-4667-3p
LINC03035	hsa-miR-4668-3p
LINC01416	hsa-miR-4668-5p
LINC01541	hsa-miR-4671-3p
LINC01924	hsa-miR-4673
LINC00668	hsa-miR-4674
LINC03110	hsa-miR-4676-3p
LINC01630	hsa-miR-4677-5p
LINC03069	hsa-miR-4680-3p
LINC01916	hsa-miR-4682
LINC01928	hsa-miR-4686
LINC02582	hsa-miR-4687-3p
LINC01539	hsa-miR-4691-5p
LINC01538	hsa-miR-4693-5p	2
LINC01928	hsa-miR-4693-5p	2
LINC01538	hsa-miR-4694-3p
LINC00907	hsa-miR-4695-5p	2
LINC01478	hsa-miR-4695-5p	2
LINC01443	hsa-miR-4696
LINC02856	hsa-miR-4698
LINC00667	hsa-miR-4700-5p
LINC01538	hsa-miR-4703-3p
LINC01416	hsa-miR-4705
LINC00526	hsa-miR-4707-3p
LINC01538	hsa-miR-4709-5p
LINC00470	hsa-miR-4711-3p
LINC00470	hsa-miR-4713-5p	2
LINC01477	hsa-miR-4713-5p	2
LINC01912	hsa-miR-4714-5p
LINC01416	hsa-miR-4724-3p
LINC00667	hsa-miR-4726-3p	2
LINC01929	hsa-miR-4726-5p	2
LINC01905	hsa-miR-4727-5p
LINC01477	hsa-miR-4728-3p
LINC01902	hsa-miR-4728-5p	2
LINC02837	hsa-miR-4728-5p	2
LINC01912	hsa-miR-4729
LINC01924	hsa-miR-4735-5p
LINC00526	hsa-miR-4738-3p	2
LINC01887	hsa-miR-4738-3p	2
LINC01903	hsa-miR-4740-5p
LINC01894	hsa-miR-4742-3p
LINC02879	hsa-miR-4743-3p
LINC02879	hsa-miR-4744
LINC01900	hsa-miR-4745-5p
LINC01902	hsa-miR-4747-5p
LINC01912	hsa-miR-4755-5p
LINC01882	hsa-miR-4756-3p
LINC01917	hsa-miR-4757-5p
LINC01910	hsa-miR-4762-3p
LINC03111	hsa-miR-4764-3p
LINC01416	hsa-miR-4765
LINC01915	hsa-miR-4768-5p
LINC00907	hsa-miR-4769-3p	2
LINC01905	hsa-miR-4769-3p	2
LINC00470	hsa-miR-4769-5p
LINC01906	hsa-miR-4770
LINC01929	hsa-miR-4772-5p
LINC00667	hsa-miR-4775	4
LINC01601	hsa-miR-4775	4
LINC01903	hsa-miR-4775	4
LINC01916	hsa-miR-4775	4
LINC01541	hsa-miR-4776-3p
LINC01255	hsa-miR-4777-5p
LINC00470	hsa-miR-4778-3p	2
LINC01912	hsa-miR-4778-3p	2
LINC01909	hsa-miR-4782-3p
LINC01904	hsa-miR-4784
LINC01539	hsa-miR-4786-3p
LINC00667	hsa-miR-4789-5p
LINC00470	hsa-miR-4795-5p
LINC01892	hsa-miR-4796-3p
LINC01919	hsa-miR-4799-5p
LINC02864	hsa-miR-484	3
LINC02864	hsa-miR-484	3
LINC03035	hsa-miR-484	3
LINC01899	hsa-miR-485-3p	2
LINC01897	hsa-miR-486-3p	2
LINC01928	hsa-miR-488-5p
LINC02856	hsa-miR-491-3p
LINC01903	hsa-miR-491-5p
LINC01912	hsa-miR-493-3p
LINC01912	hsa-miR-495-3p	2
LINC03035	hsa-miR-495-3p	2
LINC01538	hsa-miR-497-3p
LINC00470	hsa-miR-498-5p	3
LINC01478	hsa-miR-498-5p	3
LINC02565	hsa-miR-498-5p	3
LINC01538	hsa-miR-5000-3p
LINC00667	hsa-miR-5001-5p
LINC01541	hsa-miR-5002-5p
LINC01912	hsa-miR-5006-3p	3
LINC00907	hsa-miR-5006-5p	3
LINC01915	hsa-miR-5006-5p	3
LINC01892	hsa-miR-5007-5p
LINC01910	hsa-miR-5009-5p
LINC03110	hsa-miR-500a-5p
LINC01478	hsa-miR-5010-3p	2
LINC01894	hsa-miR-5010-3p	2
LINC01541	hsa-miR-5011-5p
LINC00470	hsa-miR-501-5p
LINC01903	hsa-miR-502-5p	2
LINC01915	hsa-miR-502-5p	2
LINC01887	hsa-miR-504-3p
LINC01541	hsa-miR-5047
LINC02856	hsa-miR-5094
LINC01929	hsa-miR-5100
LINC01887	hsa-miR-510-3p	2
LINC01903	hsa-miR-510-3p	2
LINC01541	hsa-miR-513a-3p
LINC00305	hsa-miR-513a-5p	2
LINC01916	hsa-miR-513a-5p	2
LINC02564	hsa-miR-513b-5p
LINC01541	hsa-miR-513c-3p
LINC01910	hsa-miR-513c-5p
LINC01887	hsa-miR-514a-3p
LINC01887	hsa-miR-514b-3p	2
LINC01910	hsa-miR-514b-5p	2
LINC03111	hsa-miR-515-5p
LINC01905	hsa-miR-516b-5p	2
LINC01922	hsa-miR-516b-5p	2
LINC01917	hsa-miR-517-5p
LINC01916	hsa-miR-518c-5p
LINC01415	hsa-miR-5193	3
LINC01897	hsa-miR-5193	3
LINC01925	hsa-miR-5193	3
LINC01917	hsa-miR-5194
LINC01443	hsa-miR-5196-3p	2
LINC01929	hsa-miR-5196-3p	2
LINC01902	hsa-miR-5196-5p
LINC00668	hsa-miR-519a-2-5p	2
LINC01544	hsa-miR-519a-2-5p	2
LINC03092	hsa-miR-519a-3p
LINC03092	hsa-miR-519b-3p
LINC03092	hsa-miR-519c-3p
LINC01902	hsa-miR-519d-3p
LINC03111	hsa-miR-519e-5p
LINC03069	hsa-miR-520a-5p
LINC00668	hsa-miR-520b-5p	2
LINC01544	hsa-miR-520b-5p	2
LINC01538	hsa-miR-522-3p
LINC03069	hsa-miR-525-5p
LINC01902	hsa-miR-526b-3p	3
LINC01887	hsa-miR-526b-5p	3
LINC01892	hsa-miR-526b-5p	3
LINC01541	hsa-miR-532-5p
LINC01899	hsa-miR-539-3p	2
LINC00907	hsa-miR-539-5p	2
LINC00470	hsa-miR-541-3p
LINC01894	hsa-miR-544a
LINC01902	hsa-miR-545-5p	3
LINC01904	hsa-miR-545-5p	3
LINC03069	hsa-miR-545-5p	3
LINC01915	hsa-miR-548a-3p
LINC03110	hsa-miR-548a-5p
LINC01538	hsa-miR-548aa	2
LINC02856	hsa-miR-548aa	2
LINC03110	hsa-miR-548ab
LINC03092	hsa-miR-548ac
LINC03110	hsa-miR-548ad-5p
LINC01538	hsa-miR-548ae-3p	2
LINC03092	hsa-miR-548ae-3p	2
LINC03110	hsa-miR-548ae-5p
LINC01538	hsa-miR-548ah-3p	2
LINC03092	hsa-miR-548ah-3p	2
LINC01538	hsa-miR-548aj-3p	2
LINC03092	hsa-miR-548aj-3p	2
LINC03110	hsa-miR-548ak
LINC01538	hsa-miR-548am-3p	3
LINC03092	hsa-miR-548am-3p	3
LINC03110	hsa-miR-548am-5p	3
LINC03092	hsa-miR-548an
LINC01538	hsa-miR-548ap-3p	2
LINC02856	hsa-miR-548ap-3p	2
LINC03110	hsa-miR-548ap-5p
LINC01538	hsa-miR-548aq-3p	3
LINC03092	hsa-miR-548aq-3p	3
LINC03110	hsa-miR-548aq-5p	3
LINC01915	hsa-miR-548ar-3p	2
LINC03110	hsa-miR-548ar-5p	2
LINC03110	hsa-miR-548as-5p
LINC01903	hsa-miR-548at-5p
LINC03110	hsa-miR-548au-5p
LINC01415	hsa-miR-548av-5p
LINC01924	hsa-miR-548av-5p
LINC01903	hsa-miR-548aw
LINC03110	hsa-miR-548ay-5p
LINC01915	hsa-miR-548az-3p
LINC03110	hsa-miR-548b-5p
LINC03092	hsa-miR-548bb-3p
LINC03110	hsa-miR-548bb-5p
LINC01915	hsa-miR-548bc
LINC02856	hsa-miR-548c-3p
LINC03110	hsa-miR-548c-5p
LINC03092	hsa-miR-548d-3p
LINC03110	hsa-miR-548d-5p
LINC01915	hsa-miR-548e-3p
LINC01915	hsa-miR-548f-3p
LINC01416	hsa-miR-548g-3p
LINC03092	hsa-miR-548h-3p
LINC03110	hsa-miR-548h-5p
LINC03110	hsa-miR-548i
LINC01538	hsa-miR-548j-3p
LINC03092	hsa-miR-548j-3p
LINC03110	hsa-miR-548j-5p
LINC01415	hsa-miR-548k	2
LINC01924	hsa-miR-548k	2
LINC01477	hsa-miR-548o-3p
LINC03110	hsa-miR-548o-5p
LINC01925	hsa-miR-548q
LINC01538	hsa-miR-548t-3p	2
LINC02856	hsa-miR-548t-3p	2
LINC01415	hsa-miR-548u	2
LINC01897	hsa-miR-548u	2
LINC03110	hsa-miR-548w
LINC01538	hsa-miR-548x-3p	2
LINC03092	hsa-miR-548x-3p	2
LINC03110	hsa-miR-548y
LINC03092	hsa-miR-548z
LINC01539	hsa-miR-549a-5p
LINC02879	hsa-miR-550a-3-5p
LINC02879	hsa-miR-550a-5p
LINC03035	hsa-miR-552-5p
LINC02879	hsa-miR-554
LINC01415	hsa-miR-5571-5p
LINC01894	hsa-miR-558
LINC03069	hsa-miR-5580-5p
LINC01917	hsa-miR-5581-3p
LINC01415	hsa-miR-5583-5p
LINC01416	hsa-miR-5584-3p	2
LINC02582	hsa-miR-5584-3p	2
LINC01416	hsa-miR-5584-5p	2
LINC01892	hsa-miR-5584-5p	2
LINC02856	hsa-miR-5584-5p
LINC01415	hsa-miR-5587-3p
LINC03092	hsa-miR-5589-3p
LINC03110	hsa-miR-559
LINC01255	hsa-miR-561-5p
LINC01538	hsa-miR-563
LINC01915	hsa-miR-567
LINC01477	hsa-miR-5681a	2
LINC02958	hsa-miR-5681a	2
LINC01912	hsa-miR-5688	2
LINC03035	hsa-miR-5688	2
LINC00470	hsa-miR-5689
LINC01544	hsa-miR-5690
LINC02856	hsa-miR-5691
LINC01443	hsa-miR-5692a	3
LINC01887	hsa-miR-5692a	3
LINC01912	hsa-miR-5692a	3
LINC01415	hsa-miR-5692b
LINC01415	hsa-miR-5692c
LINC01916	hsa-miR-5696	2
LINC02565	hsa-miR-5696	2
LINC01892	hsa-miR-5697
LINC01630	hsa-miR-5699-3p
LINC01543	hsa-miR-5699-5p
LINC01477	hsa-miR-5701
LINC02582	hsa-miR-5703
LINC01929	hsa-miR-570-3p
LINC01415	hsa-miR-573
LINC01541	hsa-miR-576-3p
LINC01924	hsa-miR-576-5p
LINC01916	hsa-miR-578	2
LINC02582	hsa-miR-578	2
LINC01478	hsa-miR-5787
LINC01478	hsa-miR-579-3p
LINC01892	hsa-miR-580-3p	2
LINC03092	hsa-miR-580-3p	2
LINC01416	hsa-miR-580-5p
LINC03092	hsa-miR-582-5p
LINC00470	hsa-miR-586
LINC01478	hsa-miR-587
LINC01916	hsa-miR-589-3p
LINC01538	hsa-miR-590-3p	4
LINC01903	hsa-miR-590-3p	4
LINC01916	hsa-miR-590-3p	4
LINC01924	hsa-miR-590-3p	4
LINC01478	hsa-miR-591
LINC01908	hsa-miR-593-3p
LINC01539	hsa-miR-597-3p
LINC01415	hsa-miR-599
LINC01254	hsa-miR-607
LINC01544	hsa-miR-6072
LINC00305	hsa-miR-6074
LINC01478	hsa-miR-6077	2
LINC01544	hsa-miR-6077	2
LINC01906	hsa-miR-6088
LINC02837	hsa-miR-616-5p
LINC01924	hsa-miR-622
LINC01903	hsa-miR-625-5p
LINC02958	hsa-miR-627-3p
LINC01894	hsa-miR-628-5p
LINC01917	hsa-miR-629-5p
LINC01902	hsa-miR-630
LINC01908	hsa-miR-632
LINC02864	hsa-miR-650	2
LINC02864	hsa-miR-650	2
LINC01601	hsa-miR-6501-5p	2
LINC01924	hsa-miR-6501-5p	2
LINC01415	hsa-miR-6507-5p
LINC01906	hsa-miR-6508-3p
LINC01630	hsa-miR-6508-5p
LINC01416	hsa-miR-6513-3p
LINC00470	hsa-miR-651-3p	2
LINC01910	hsa-miR-651-3p	2
LINC01415	hsa-miR-6515-3p	2
LINC01539	hsa-miR-6515-3p	2
LINC01901	hsa-miR-654-3p	2
LINC00470	hsa-miR-654-5p	2
LINC00526	hsa-miR-655-3p
LINC01917	hsa-miR-659-3p
LINC02856	hsa-miR-661
LINC01902	hsa-miR-664a-3p	2
LINC01916	hsa-miR-664a-3p	2
LINC01478	hsa-miR-664b-3p
LINC01904	hsa-miR-668-3p
LINC00907	hsa-miR-670-3p	5
LINC01538	hsa-miR-670-3p	5
LINC01630	hsa-miR-670-3p	5
LINC01902	hsa-miR-670-3p	5
LINC01906	hsa-miR-670-3p	5
LINC01541	hsa-miR-6715b-3p
LINC02582	hsa-miR-6715b-5p
LINC01906	hsa-miR-671-5p
LINC01915	hsa-miR-6719-3p
LINC01887	hsa-miR-6722-3p
LINC01415	hsa-miR-6728-3p
LINC01902	hsa-miR-6729-3p
LINC03110	hsa-miR-6731-5p
LINC01909	hsa-miR-6736-3p
LINC01905	hsa-miR-6738-3p	2
LINC01924	hsa-miR-6738-3p	2
LINC01415	hsa-miR-6739-3p	2
LINC01906	hsa-miR-6739-3p	2
LINC01630	hsa-miR-6740-3p
LINC01917	hsa-miR-6744-3p
LINC01924	hsa-miR-6748-5p	2
LINC02879	hsa-miR-6748-5p	2
LINC00305	hsa-miR-6750-3p
LINC01887	hsa-miR-6752-5p
LINC01904	hsa-miR-6753-5p
LINC00470	hsa-miR-675-3p
LINC01387	hsa-miR-6754-3p
LINC01917	hsa-miR-6754-3p
LINC01901	hsa-miR-6757-5p
LINC02879	hsa-miR-6758-5p
LINC03110	hsa-miR-6763-5p
LINC01544	hsa-miR-6764-5p
LINC01909	hsa-miR-6766-3p
LINC01928	hsa-miR-6775-3p
LINC01924	hsa-miR-6776-5p
LINC00667	hsa-miR-6778-3p
LINC01928	hsa-miR-6778-5p
LINC01903	hsa-miR-6780a-5p
LINC01254	hsa-miR-6781-3p	3
LINC01544	hsa-miR-6781-3p	3
LINC01904	hsa-miR-6781-3p	3
LINC01905	hsa-miR-6782-3p
LINC01478	hsa-miR-6783-5p
LINC01919	hsa-miR-6785-3p
LINC03035	hsa-miR-6788-5p
LINC01903	hsa-miR-6791-3p
LINC01539	hsa-miR-6792-3p
LINC02837	hsa-miR-6799-5p
LINC00907	hsa-miR-6800-3p
LINC02856	hsa-miR-6805-3p
LINC01416	hsa-miR-6806-3p
LINC01915	hsa-miR-6807-3p
LINC01882	hsa-miR-6809-3p
LINC01478	hsa-miR-6811-3p	2
LINC02879	hsa-miR-6811-3p	2
LINC01539	hsa-miR-6815-3p
LINC01541	hsa-miR-6815-5p
LINC01601	hsa-miR-6815-5p	2
LINC01895	hsa-miR-6815-5p	2
LINC00667	hsa-miR-6817-3p	2
LINC01415	hsa-miR-6817-3p	2
LINC00907	hsa-miR-6817-5p	2
LINC01905	hsa-miR-6817-5p	2
LINC00668	hsa-miR-6818-3p	2
LINC01443	hsa-miR-6818-3p	2
LINC01899	hsa-miR-6819-3p
LINC01541	hsa-miR-6820-3p
LINC01478	hsa-miR-6824-5p
LINC01892	hsa-miR-6826-5p
LINC01910	hsa-miR-6828-3p
LINC01903	hsa-miR-6829-3p
LINC01443	hsa-miR-6829-5p
LINC01925	hsa-miR-6830-3p
LINC02565	hsa-miR-6830-3p
LINC00667	hsa-miR-6830-5p
LINC01255	hsa-miR-6830-5p
LINC01541	hsa-miR-6832-3p
LINC01915	hsa-miR-6833-3p
LINC00667	hsa-miR-6836-3p	3
LINC00668	hsa-miR-6836-3p	3
LINC01909	hsa-miR-6836-3p	3
LINC01899	hsa-miR-6839-3p
LINC01903	hsa-miR-6841-3p	2
LINC02856	hsa-miR-6841-3p	2
LINC01887	hsa-miR-6842-5p
LINC00470	hsa-miR-6844	3
LINC01905	hsa-miR-6844	3
LINC01917	hsa-miR-6844	3
LINC03111	hsa-miR-6845-3p
LINC01912	hsa-miR-6846-3p
LINC01894	hsa-miR-6847-3p
LINC01415	hsa-miR-6852-3p
LINC01544	hsa-miR-6854-5p
LINC01925	hsa-miR-6861-3p
LINC01541	hsa-miR-6865-5p	3
LINC01601	hsa-miR-6865-5p	3
LINC01895	hsa-miR-6865-5p	3
LINC01541	hsa-miR-6867-5p	4
LINC01924	hsa-miR-6867-5p	4
LINC02879	hsa-miR-6867-5p	4
LINC03035	hsa-miR-6867-5p	4
LINC01905	hsa-miR-6869-5p
LINC00668	hsa-miR-6871-5p
LINC01415	hsa-miR-6873-3p	2
LINC01902	hsa-miR-6873-3p	2
LINC01544	hsa-miR-6873-5p	3
LINC02864	hsa-miR-6873-5p	3
LINC02864	hsa-miR-6873-5p	3
LINC01924	hsa-miR-6874-3p
LINC01541	hsa-miR-6874-5p
LINC01539	hsa-miR-6875-3p	2
LINC01917	hsa-miR-6875-3p	2
LINC01899	hsa-miR-6877-3p
LINC00668	hsa-miR-6878-5p	2
LINC03035	hsa-miR-6878-5p	2
LINC01925	hsa-miR-6880-5p
LINC01902	hsa-miR-6882-3p
LINC01478	hsa-miR-6882-5p
LINC00470	hsa-miR-6884-3p
LINC01477	hsa-miR-6885-3p	2
LINC01903	hsa-miR-6885-3p	2
LINC01897	hsa-miR-6885-5p	2
LINC01254	hsa-miR-6888-5p	2
LINC01906	hsa-miR-6890-3p
LINC01544	hsa-miR-6891-3p
LINC00470	hsa-miR-6894-5p
LINC01478	hsa-miR-7106-5p
LINC00667	hsa-miR-7110-3p	3
LINC01415	hsa-miR-7110-3p	3
LINC01909	hsa-miR-7110-3p	3
LINC01887	hsa-miR-7110-5p
LINC01538	hsa-miR-7113-5p
LINC01903	hsa-miR-7114-5p
LINC00470	hsa-miR-7150
LINC01887	hsa-miR-7151-3p
LINC01882	hsa-miR-7153-5p	2
LINC02879	hsa-miR-7153-5p	2
LINC01415	hsa-miR-7154-5p
LINC02879	hsa-miR-7159-5p
LINC02879	hsa-miR-7160-5p
LINC01415	hsa-miR-7161-5p	2
LINC01897	hsa-miR-7161-5p	2
LINC01902	hsa-miR-7515
LINC01541	hsa-miR-758-3p	3
LINC02864	hsa-miR-758-3p	3
LINC02864	hsa-miR-758-3p	3
LINC01443	hsa-miR-759	2
LINC01909	hsa-miR-759	2
LINC01900	hsa-miR-760
LINC00667	hsa-miR-762
LINC01892	hsa-miR-764
LINC01915	hsa-miR-766-3p
LINC03110	hsa-miR-767-3p
LINC01904	hsa-miR-7705
LINC01906	hsa-miR-7844-5p
LINC01478	hsa-miR-7845-5p
LINC01887	hsa-miR-7854-3p
LINC01892	hsa-miR-7856-5p
LINC01904	hsa-miR-7856-5p
LINC01925	hsa-miR-7978
LINC01444	hsa-miR-8052
LINC01415	hsa-miR-8054	2
LINC01924	hsa-miR-8054	2
LINC01910	hsa-miR-8058
LINC01477	hsa-miR-8060
LINC01630	hsa-miR-8067
LINC01477	hsa-miR-8068	4
LINC01892	hsa-miR-8068	4
LINC01902	hsa-miR-8068	4
LINC01928	hsa-miR-8068	4
LINC00667	hsa-miR-8069
LINC01601	hsa-miR-8070
LINC00470	hsa-miR-8075
LINC00667	hsa-miR-8076	3
LINC01478	hsa-miR-8076	3
LINC01887	hsa-miR-8076	3
LINC01909	hsa-miR-8079
LINC01539	hsa-miR-8081
LINC03110	hsa-miR-8085
LINC02856	hsa-miR-8086
LINC00907	hsa-miR-8087
LINC00667	hsa-miR-8485
LINC01539	hsa-miR-875-3p	4
LINC01915	hsa-miR-875-3p	4
LINC02864	hsa-miR-875-3p	4
LINC02864	hsa-miR-875-3p	4
LINC01916	hsa-miR-875-5p	2
LINC02958	hsa-miR-876-5p	2
LINC01912	hsa-miR-889-5p
LINC01539	hsa-miR-891b
LINC03110	hsa-miR-892c-3p
LINC01539	hsa-miR-892c-5p
LINC01915	hsa-miR-92a-3p
LINC01915	hsa-miR-92b-3p
LINC01916	hsa-miR-93-3p
LINC01902	hsa-miR-93-5p
LINC01539	hsa-miR-938
LINC00305	hsa-miR-942-5p	2
LINC01929	hsa-miR-942-5p	2
LINC01541	hsa-miR-943	2
LINC01902	hsa-miR-943	2
LINC01916	hsa-miR-944
LINC01909	hsa-miR-95-5p	3
LINC01915	hsa-miR-95-5p	3
LINC03035	hsa-miR-95-5p	3
LINC01416	hsa-miR-9-5p
LINC01601	hsa-miR-96-3p
LINC01894	hsa-miR-9718
LINC03092	hsa-miR-98-3p
LINC01601	hsa-miR-9902
LINC01895	hsa-miR-9903	2
LINC03092	hsa-miR-9903	2
LINC01601	hsa-miR-9985

## Sheet: miRs from LncBook v. 2.0 
A list of microRNAs interacting with lincRNAs of chromosome 18 retrieved from LncBook v. 2.0 database
LINC00470	miR-106b	hsa-miR-106b-5p
LINC00470	miR-130	hsa-miR-130-3p
LINC00470	miR-17	hsa-miR-17-5p
LINC00470	miR-320c	hsa-miR-320c
LINC00470	miR-320d	hsa-miR-320d
LINC00470	miR-887	hsa-miR-887-3p
LINC00470	miR-93	hsa-miR-93-5p
LINC00526	miR-124	hsa-miR-124-3p
LINC00667	let-7b	hsa-let-7b-5p
LINC00667	let-7g	hsa-let-7g-5p
LINC00667	let-7i	has-let-7i-5p
LINC00667	miR-105	hsa-miR-105-5p
LINC00667	miR-106a	hsa-miR-106a-5p
LINC00667	miR-106b	hsa-miR-106b-5p
LINC00667	miR-122	hsa-miR-122-5p
LINC00667	miR-124	hsa-miR-124-3p
LINC00667	miR-129-2	hsa-miR-129-2-3p
LINC00667	miR-142	hsa-miR-142-5p
LINC00667	miR-148a	hsa-miR-148a-3p
LINC00667	miR-17	hsa-miR-17-5p
LINC00667	miR-181a	hsa-miR-181a-5p
LINC00667	miR-181a	hsa-miR-181a
LINC00667	miR-181b	hsa-miR-181b-5p
LINC00667	miR-181d	hsa-miR-181d-5p
LINC00667	miR-183	has-miR-183-5p
LINC00667	miR-196a	hsa-miR-196a-5p
LINC00667	miR-19a	hsa-miR-19a-3p
LINC00667	miR-19b	hsa-miR-19b-3p
LINC00667	miR-20a	hsa-miR-20a-5p
LINC00667	miR-26a	hsa-miR-26a-5p
LINC00667	miR-26b	hsa-miR-26b-5p
LINC00667	miR-296	hsa-miR-296-3p
LINC00667	mir-301b	hsa-miR-301b-3p
LINC00667	miR-30a	hsa-miR-30a-5p
LINC00667	miR-30b	hsa-miR-30b-3p
LINC00667	miR-30c	hsa-miR-30c-1
LINC00667	miR-31	hsa-miR-31-5p
LINC00667	miR-3187	hsa-miR-3187-3p
LINC00667	miR-335	hsa-miR-335-5p
LINC00667	miR-33a	hsa-miR-33a-5p
LINC00667	miR-34a	hsa-miR-34a-5p
LINC00667	miR-3679	hsa-miR-3679-5p
LINC00667	miR-3934	hsa-miR-3934-5p
LINC00667	miR-429	hsa-miR-429
LINC00667	miR-454	hsa-miR-454-3p
LINC00667	miR-598	hsa-miR-598-5p
LINC00667	miR-7	hsa-miR-7-5p
LINC00667	miR-766	hsa-miR-766-5p
LINC00667	miR-877	hsa-miR-877-5p
LINC00667	miR-9	hsa-miR-9-3p
LINC00667	miR-93	hsa-miR-93-5p
LINC00668	let-7a	hsa-let-7a-5p
LINC00668	let-7b	hsa-let-7b-5p
LINC00668	let-7c	hsa-let-7c-5p
LINC00668	let-7d	hsa-let-7d-5p
LINC00668	let-7f	has-let-7f-5p
LINC00668	miR-98	hsa-miR-98-5p
LINC00668	miR-103a	hsa-miR-103a-3p
LINC00668	miR-107	hsa-miR-107
LINC00668	miR-204	hsa-miR-204-3p
LINC00668	miR-204	hsa-miR-204-5p
LINC00668	miR-20a	hsa-miR-20a-3p
LINC00668	miR-21	hsa-miR-21-5p
LINC00668	miR-2114	hsa-miR-2114-5p
LINC00668	miR-2115	hsa-miR-2115-5p
LINC00668	miR-23b	hsa-miR-23b-3p
LINC00668	miR-34a	hsa-miR-34a-5p
LINC00668	miR-491	hsa-miR-491-3p
LINC00668	miR-642b	hsa-miR-642b-5p
LINC00668	let-7e	hsa-let-7e-5p
LINC00668	let-7i	has-let-7i-5p
LINC00907	miR-3184	hsa-miR-3184-5p
LINC01415	miR-3174	hsa-miR-3174
LINC01539	miR-182	hsa-miR-182-5p
LINC01539	miR-96	hsa-miR-96-5p
LINC01539	miR-34a	hsa-miR-34a-5p
LINC01544	miR-22	hsa-miR-22-3p
LINC01544	miR-25	hsa-miR-25-5p
LINC01544	miR-28	hsa-miR-28-5p
LINC01544	miR-335	hsa-miR-335-5p
LINC01544	miR-598	hsa-miR-598-3p
LINC01544	miR-92b	hsa-miR-92b-3p
LINC01900	miR-29a	hsa-miR-29a-3p
LINC01909	miR-488	hsa-miR-488-3p
LINC01909	miR-518d	hsa-miR-518d-5p
LINC01909	miR-520c	hsa-miR-520c-5p
LINC01909	miR-526a	hsa-miR-526a-5p
LINC01909	miR-4698	hsa-miR-4698
LINC01909	miR-548at	hsa-miR-548at-3p
LINC01909	miR-548o	hsa-miR-548o-3p
LINC01909	miR-616	hsa-miR-616-5p
LINC01926	miR-183	hsa-miR-183-5p
LINC01926	miR-29a	hsa-miR-29a-3p
LINC01926	miR-29b	hsa-miR-29b-3p
LINC01926	miR-93	hsa-miR-93-5p
LINC01929	miR-15a	hsa-miR-15a-5p
