# Supplementary material for: Long Intergenic Non-Coding RNAs of Human Chromosome 18: Focus on Cancers
Source: Biomedicines. 2024 Feb 28;12(3):544. doi: 10.3390/biomedicines12030544 (PMC10968066; doi:10.3390/biomedicines12030544)
Supplement: Supplementary file 1 [file biomedicines-12-00544-s001.zip › Table_S13_Ershov.xlsx]

## Sheet: LINC00470
Table S13. A list #2 of top-100 co-expressed genes (for linc-genes encoding lincRNAs of human chromosome 18 in the pan-cancer studies)
ACC_Tumor			CHOL_Tumor			GBM_Tumor			KICH_Tumor			KIRC_Tumor			MESO_Tumor			PAAD_Tumor			READ_Tumor			TGCT_Tumor			THYM_Tumor
RP11-486M23.2	ENSG00000253182.1	0.86	AP001187.11	ENSG00000230835.1	0.90	OSBPL9P4	ENSG00000256420.1	0.88	RP11-332J15.2	ENSG00000250060.1	1.00	HOMER2P1	ENSG00000228966.2	0.86	RP11-288C17.1	ENSG00000265417.1	0.92	RP11-288C17.1	ENSG00000265417.1	0.82	HSPA8P13	ENSG00000253425.2	0.97	SERHL2	ENSG00000183569.17	0.75	RP11-288C17.1	ENSG00000265417.1	0.91
EFTUD1P2	ENSG00000248998.2	0.83	RP11-277P12.9	ENSG00000256155.1	0.89	AC008060.1	ENSG00000280862.1	0.88	MAGEA12	ENSG00000213401.8	1.00	RP11-714M23.2	ENSG00000277837.1	0.84	CCDC141	ENSG00000163492.13	0.89	RPS16P8	ENSG00000213664.4	0.80	SMYD3-IT1	ENSG00000230184.1	0.97	RP11-431J24.2	ENSG00000238178.6	0.75	TCEB3B	ENSG00000206181.5	0.85
HMGB1P23	ENSG00000253770.1	0.81	RAD17P2	ENSG00000223724.1	0.87	ZFRP1	ENSG00000234570.1	0.88	RP11-17M15.2	ENSG00000261127.2	1.00	RP11-474D1.3	ENSG00000214039.8	0.84	DGKK	ENSG00000274588.1	0.88	RP11-482E14.1	ENSG00000233321.1	0.79	ASNSP1	ENSG00000248498.3	0.97	PLCXD2	ENSG00000240891.6	0.75	CH17-232I21.1	ENSG00000275121.1	0.83
MKRN9P	ENSG00000258128.2	0.78	CTD-2353F22.1	ENSG00000250155.1	0.86	USP17L23	ENSG00000250913.2	0.88	MGC39584	ENSG00000280081.3	1.00	ZNF716	ENSG00000182111.8	0.82	MASP1	ENSG00000127241.16	0.88	RP11-433J22.3	ENSG00000234190.1	0.79	RP11-288C17.1	ENSG00000265417.1	0.96	CTD-3035K23.6	ENSG00000277463.1	0.73	RPL5P19	ENSG00000220553.1	0.83
RP11-486M23.3	ENSG00000280147.1	0.78	RP6-24A23.6	ENSG00000260548.1	0.86	AC011513.4	ENSG00000268833.1	0.88	MMP1	ENSG00000196611.4	1.00	POTEH	ENSG00000198062.14	0.82	BMP15	ENSG00000130385.5	0.87	PGBD4P8	ENSG00000229332.2	0.78	bP-2189O9.3	ENSG00000279579.3	0.91	AC098973.2	ENSG00000225548.5	0.73	XAGE5	ENSG00000171405.12	0.83
RP11-252E2.1	ENSG00000247033.1	0.78	RP3-347M6.2	ENSG00000238116.2	0.85	RP11-960B9.2	ENSG00000262231.1	0.88	RP13-147D17.3	ENSG00000282815.1	1.00	RP11-573D15.2	ENSG00000232233.1	0.81	RPL7L1P11	ENSG00000176970.8	0.87	RN7SKP222	ENSG00000222583.1	0.78	RN7SL330P	ENSG00000244391.3	0.89	RP11-222K16.2	ENSG00000272282.1	0.73	CTD-3107M8.1	ENSG00000253346.1	0.83
CTD-2206N4.2	ENSG00000266013.1	0.78	RP11-288C17.1	ENSG00000265417.1	0.83	RP11-47P18.1	ENSG00000242828.1	0.88	RP11-56L13.4	ENSG00000260649.1	1.00	KCNH5	ENSG00000140015.19	0.81	LA16c-349E11.1	ENSG00000260702.2	0.87	LINC00550	ENSG00000281778.1	0.78	LINC01202	ENSG00000280776.1	0.88				RN7SL445P	ENSG00000240577.3	0.83
CCT4P1	ENSG00000242703.1	0.78	PABPC5	ENSG00000174740.7	0.82	RD3L	ENSG00000227729.3	0.88	RP11-66D17.3	ENSG00000237588.2	1.00	PRAMEF15	ENSG00000204501.6	0.81	SNORA73	ENSG00000222145.1	0.87	RP11-170L9.1	ENSG00000254437.1	0.78	LINC00648	ENSG00000259129.5	0.82				RPL23AP19	ENSG00000229716.2	0.83
RP11-6F2.3	ENSG00000239706.1	0.78	RP11-156K23.3	ENSG00000275202.1	0.81	HMGN2P36	ENSG00000228901.3	0.88	UBTFL8	ENSG00000224082.1	1.00	SEC14L3	ENSG00000100012.11	0.81	RP11-299D14.2	ENSG00000254178.1	0.87	RN7SKP89	ENSG00000222706.1	0.78	RP11-774D14.1	ENSG00000251629.6	0.79				RN7SL237P	ENSG00000264767.2	0.83
FGF12-AS3	ENSG00000226709.1	0.78	CT62	ENSG00000225362.8	0.80	RNU6-322P	ENSG00000251819.1	0.88	TMPRSS11GP	ENSG00000229009.7	1.00	RP11-428P16.3	ENSG00000277981.1	0.81	RN7SKP179	ENSG00000251935.1	0.87	RP11-529P9.1	ENSG00000251172.1	0.78	MGAT4C	ENSG00000182050.13	0.75				Y_RNA	ENSG00000206662.1	0.83
RP5-1186P10.1	ENSG00000279005.1	0.78	LINC01220	ENSG00000259687.1	0.79	AQP7P4	ENSG00000176115.9	0.88	CT47A6	ENSG00000226023.5	1.00	LINC01482	ENSG00000267659.5	0.81	RPS12P5	ENSG00000226216.1	0.87	RP11-172C16.5	ENSG00000270204.1	0.78	RP11-681L8.1	ENSG00000254044.5	0.74				RP11-54F2.1	ENSG00000251196.1	0.83
AC114273.3	ENSG00000280412.1	0.78	RP11-744K17.8	ENSG00000266885.2	0.79	IFNWP4	ENSG00000225027.2	0.88	RP11-629F19.1	ENSG00000258385.1	1.00	ZG16B	ENSG00000162078.11	0.80	AC018866.1	ENSG00000229774.1	0.87	RP11-794P6.3	ENSG00000255208.1	0.78	LINC01249	ENSG00000231532.5	0.73				CSPG4P1Y	ENSG00000240450.1	0.83
OR52E6	ENSG00000205409.3	0.78	RP11-369G6.2	ENSG00000268105.1	0.79	CTD-2201G16.1	ENSG00000258444.1	0.88	PPP1R3A	ENSG00000154415.7	1.00	RP11-635N19.3	ENSG00000269989.1	0.80	AC140725.8	ENSG00000275771.1	0.87	AC114755.2	ENSG00000230353.5	0.78	RP11-79E3.3	ENSG00000250954.5	0.72				SERPINB8P1	ENSG00000217707.2	0.83
RP11-313I2.5	ENSG00000255540.1	0.78	AP000343.1	ENSG00000214526.3	0.78	uc_338	ENSG00000278643.1	0.88	RP11-445N18.7	ENSG00000243349.2	1.00	RP11-706C16.7	ENSG00000253196.1	0.80	AC078794.1	ENSG00000221211.1	0.87	RP1-217P22.2	ENSG00000219273.1	0.78	RP11-636O21.1	ENSG00000267413.1	0.72				Y_RNA	ENSG00000202078.1	0.83
CTD-2291D10.2	ENSG00000261558.1	0.78	RP11-40B20.1	ENSG00000274346.1	0.78	Metazoa_SRP	ENSG00000273913.1	0.88	RP11-4O3.2	ENSG00000249831.2	1.00	RP4-604G5.3	ENSG00000235713.1	0.80	RP4-808O4.2	ENSG00000233710.1	0.87	HSBP1P2	ENSG00000166530.8	0.78	DNAJB13	ENSG00000187726.8	0.71				CICP10	ENSG00000224160.1	0.83
HSPE1P13	ENSG00000225900.1	0.78	MEG8	ENSG00000258399.6	0.78	KRTAP2-4	ENSG00000213417.3	0.88	ACTG1P12	ENSG00000226642.1	1.00	CTC-480C2.1	ENSG00000250874.1	0.80	RP11-210K20.6	ENSG00000276486.1	0.87	IGLVV-66	ENSG00000254075.1	0.78	TENM1	ENSG00000009694.13	0.71				RP11-149P24.1	ENSG00000253248.5	0.83
RP11-305B6.3	ENSG00000258969.1	0.78	RGS2	ENSG00000116741.7	0.77	RP11-443B9.1	ENSG00000224092.1	0.88	HSPD1P14	ENSG00000227000.2	1.00	CTD-2280E9.1	ENSG00000249916.1	0.80	RP11-424E7.3	ENSG00000229926.1	0.87	RP11-252C24.2	ENSG00000233724.1	0.78	RP11-412P11.1	ENSG00000248837.5	0.71				TCEB2P3	ENSG00000232285.1	0.83
RP11-435O5.6	ENSG00000271314.1	0.78	SNORA79	ENSG00000222489.1	0.77	RNU1-108P	ENSG00000199426.1	0.88	CTB-7E3.1	ENSG00000254130.1	1.00	RP11-333B6.1	ENSG00000278988.1	0.79	AC068137.13	ENSG00000226915.1	0.87	RP5-947P14.1	ENSG00000237480.1	0.78	RP11-21B23.2	ENSG00000261092.1	0.71				RN7SKP253	ENSG00000252233.1	0.83
RP11-113K21.1	ENSG00000254522.1	0.78	NPY6R	ENSG00000226306.6	0.77	RP11-223P11.3	ENSG00000223528.7	0.88	FGF4	ENSG00000075388.3	1.00	RP11-267C16.1	ENSG00000227115.6	0.79	NAMPTP2	ENSG00000249229.2	0.87	Y_RNA	ENSG00000202251.1	0.78							OR14A2	ENSG00000241128.1	0.83
LYPLA1P2	ENSG00000251483.2	0.78	AC128709.2	ENSG00000237167.1	0.76	PSPC1P1	ENSG00000227879.2	0.87	RP11-408E1.1	ENSG00000225122.1	1.00	AC015922.6	ENSG00000237057.2	0.79	RP11-481J8.3	ENSG00000279925.1	0.87	SNORD8	ENSG00000200785.1	0.78							AC110754.3	ENSG00000230044.1	0.83
RPL23AP46	ENSG00000213122.4	0.78	KRT17P4	ENSG00000205312.8	0.76	TRIM48	ENSG00000150244.11	0.87	VN1R35P	ENSG00000228660.1	1.00	RP11-461F11.2	ENSG00000279091.1	0.79	RP11-201O14.2	ENSG00000232768.1	0.87	RP5-1128N12.2	ENSG00000271397.1	0.78							CTD-2561J22.3	ENSG00000269237.1	0.83
RP11-524K22.1	ENSG00000233470.1	0.78	POLR2M	ENSG00000255529.7	0.76	PIK3CD	ENSG00000171608.15	0.84	RBM22P12	ENSG00000260631.1	1.00	RP11-244B22.10	ENSG00000280180.1	0.79	R3HDM2P2	ENSG00000216817.1	0.87	LAMTOR3P1	ENSG00000228825.1	0.78							RP11-778D9.9	ENSG00000233576.1	0.83
RP11-150D5.2	ENSG00000260983.1	0.78	RP11-456O19.2	ENSG00000267057.5	0.76	KRTAP4-4	ENSG00000171396.11	0.81	OR52E5	ENSG00000277932.1	1.00	FOXA1	ENSG00000129514.5	0.79	Pinc	ENSG00000278004.1	0.87	RP5-859I17.3	ENSG00000276385.1	0.78							Y_RNA	ENSG00000207207.1	0.83
POLR2KP1	ENSG00000258284.1	0.78	PCDHGA9	ENSG00000261934.2	0.75	BHLHE23	ENSG00000125533.5	0.80	RP11-248N22.1	ENSG00000250957.1	1.00	LINC01304	ENSG00000237401.6	0.79	PABPC1P9	ENSG00000229658.1	0.87	RP11-33E24.3	ENSG00000217334.1	0.78							ST6GAL2-IT1	ENSG00000238250.1	0.83
RP11-394A14.4	ENSG00000272299.1	0.78	RP11-24C14.1	ENSG00000270521.1	0.75	PIK3CD-AS2	ENSG00000231789.2	0.79	AP000705.8	ENSG00000234340.1	1.00	RP11-629O4.1	ENSG00000176812.7	0.79	MTND1P34	ENSG00000225514.1	0.87	RN7SKP66	ENSG00000252490.1	0.78							RP11-588D3.1	ENSG00000240752.1	0.83
RP11-90J7.2	ENSG00000229543.1	0.78	TMEM209	ENSG00000146842.16	0.75	RP11-78F17.3	ENSG00000263505.1	0.78	AC104777.1	ENSG00000232359.1	1.00	RP11-475A13.1	ENSG00000259737.6	0.79	OR8S21P	ENSG00000273434.1	0.87	CTC-457E21.4	ENSG00000269316.1	0.78							RP11-295P22.3	ENSG00000275828.1	0.83
RPL23AP45	ENSG00000213285.4	0.78	CYP19A1	ENSG00000137869.13	0.75	KRTAP4-16P	ENSG00000241241.1	0.76	AP000647.3	ENSG00000256254.1	1.00	PMCHL1	ENSG00000168967.14	0.79	RN7SL470P	ENSG00000263669.2	0.87	Metazoa_SRP	ENSG00000274206.1	0.78							RP11-386B13.1	ENSG00000249520.1	0.83
VN1R79P	ENSG00000269885.1	0.78	RP11-322E11.3	ENSG00000279074.1	0.75	KRTAP4-12	ENSG00000213416.3	0.74	XXbac-BPG32J3.19	ENSG00000250641.1	1.00	SLC25A39P2	ENSG00000257016.1	0.79	RP11-410N8.1	ENSG00000228156.1	0.87	MIR1289-1	ENSG00000221763.1	0.78							LINC01519	ENSG00000237267.1	0.83
AC004692.4	ENSG00000228680.1	0.78	LINC00540	ENSG00000276476.2	0.74	LCN1	ENSG00000160349.9	0.73	RP11-510C10.4	ENSG00000261213.1	1.00	AC091493.1	ENSG00000224039.1	0.79	TRBV29OR9-2	ENSG00000223394.2	0.87	RP11-626I20.1	ENSG00000257415.1	0.78							RP11-212D3.4	ENSG00000226854.1	0.83
AC068134.8	ENSG00000224516.5	0.78	ZSCAN5CP	ENSG00000204532.6	0.73	KRTAP9-2	ENSG00000239886.4	0.72	ANKRD54P1	ENSG00000236442.1	1.00	RNU2-49P	ENSG00000222598.1	0.79	PART1_1	ENSG00000273701.1	0.87	RP11-539D10.1	ENSG00000278602.1	0.78							AP000648.6	ENSG00000254436.1	0.83
RP11-52J3.3	ENSG00000234361.1	0.78	HNRNPA1P53	ENSG00000229534.1	0.73				CTA-481E9.3	ENSG00000260242.1	1.00	AC009502.4	ENSG00000227308.2	0.79	RP11-144G16.1	ENSG00000224301.1	0.87	RN7SL435P	ENSG00000263944.2	0.78							CSPG4P2Y	ENSG00000244231.1	0.83
RP11-297P16.3	ENSG00000251577.5	0.78	RP11-488L18.8	ENSG00000232347.1	0.73				DEFB123	ENSG00000180424.6	1.00	AC092071.1	ENSG00000269353.1	0.79	RP11-116D17.2	ENSG00000257519.1	0.87	TPMTP3	ENSG00000232562.1	0.78							SLC25A5P9	ENSG00000251078.1	0.83
RP13-362E11.3	ENSG00000274022.1	0.78	DPRXP2	ENSG00000271304.1	0.73				TTTY25P	ENSG00000259247.1	1.00	DNAJB5P1	ENSG00000230335.1	0.79	IFNA16	ENSG00000147885.4	0.87	RP11-398C13.2	ENSG00000237032.1	0.78							AC073264.6	ENSG00000230556.1	0.83
RN7SL285P	ENSG00000243313.2	0.78	GOLGA6B	ENSG00000215186.6	0.73				SCARNA16	ENSG00000252329.1	1.00	TMPRSS9	ENSG00000178297.12	0.79	OR2T6	ENSG00000198104.2	0.87	MTND2P22	ENSG00000231954.1	0.78							AC010970.2	ENSG00000225840.2	0.83
RP11-252O18.2	ENSG00000239805.1	0.78	AC147651.5	ENSG00000229380.1	0.73				KRT8P4	ENSG00000248231.1	1.00	RP11-561O4.1	ENSG00000239455.1	0.79	RP1-49C23.1	ENSG00000227427.1	0.87	RN7SKP72	ENSG00000199197.1	0.78							RP11-473C19.1	ENSG00000257458.1	0.83
EEF1DP5	ENSG00000213130.3	0.78	LINC01271	ENSG00000233077.1	0.73				RP11-80F22.6	ENSG00000260341.1	1.00	UBE2V2P1	ENSG00000226255.1	0.79	AC012078.2	ENSG00000218410.1	0.87	OR6K2	ENSG00000196171.3	0.78							RP11-353P15.1	ENSG00000258532.1	0.83
LINC01288	ENSG00000254344.1	0.78	POTEH	ENSG00000198062.14	0.72				RP11-15M15.1	ENSG00000223492.1	1.00	GAPDHP66	ENSG00000250933.1	0.79	IFNA17	ENSG00000234829.3	0.87	RP1-290I10.2	ENSG00000216781.2	0.78							RP11-733D4.2	ENSG00000270767.1	0.83
KB-1836B5.3	ENSG00000270865.1	0.78	AC007163.2	ENSG00000280298.1	0.72				HMGN2P39	ENSG00000214281.3	1.00	CTD-2014E2.2	ENSG00000261648.1	0.79	USP17L13	ENSG00000232399.3	0.87	SNORA77	ENSG00000221083.1	0.78							AC007403.3	ENSG00000223859.1	0.83
RP11-323C15.1	ENSG00000235922.1	0.78	CDK18	ENSG00000117266.15	0.72				TECRL	ENSG00000205678.7	1.00	VN1R7P	ENSG00000275592.1	0.79	RP6-99M1.1	ENSG00000204915.3	0.87	AC002542.2	ENSG00000227532.1	0.78							RNA5SP172	ENSG00000201931.1	0.83
DPY19L2P5	ENSG00000225100.2	0.78	IGKV6D-41	ENSG00000211626.2	0.72				BPESC1	ENSG00000232416.3	1.00	HCFC2P1	ENSG00000232087.1	0.79	RP11-575I8.1	ENSG00000260390.1	0.87	Y_RNA	ENSG00000207207.1	0.78							RP11-560A15.3	ENSG00000203266.2	0.83
OR5AC4P	ENSG00000251090.1	0.78	EGOT	ENSG00000275981.1	0.72				MRPS33P4	ENSG00000234821.1	1.00	RP11-334E15.1	ENSG00000280105.1	0.79	IFNW1	ENSG00000177047.6	0.87	SDR16C6P	ENSG00000253542.7	0.78							MIR22	ENSG00000275595.1	0.83
CYP2G2P	ENSG00000268101.2	0.78	RP11-152C15.1	ENSG00000253173.3	0.72				RP11-30H9.1	ENSG00000258065.1	1.00	RP11-339A11.2	ENSG00000260322.1	0.79	RP11-113D19.9	ENSG00000275980.1	0.86	CTD-2134A5.3	ENSG00000258914.1	0.78							RP11-346C16.4	ENSG00000219559.1	0.83
OR51J1	ENSG00000184321.1	0.78	OR2AF1P	ENSG00000235730.1	0.72				PABPC1P5	ENSG00000270455.1	1.00	RP11-84A19.2	ENSG00000203620.2	0.79	IFNWP9	ENSG00000226597.1	0.86	OR4D8P	ENSG00000204989.3	0.78							RP11-598C10.1	ENSG00000228048.1	0.83
RP11-434D9.2	ENSG00000249894.1	0.78	RP11-385N23.1	ENSG00000230121.1	0.71				KRT18P42	ENSG00000214794.4	1.00	AC007204.3	ENSG00000274800.1	0.79	GLDCP1	ENSG00000248590.2	0.86	U8	ENSG00000239142.1	0.78							RP11-292D4.1	ENSG00000248346.1	0.83
RP11-323D18.5	ENSG00000277099.1	0.78	TGM2	ENSG00000198959.11	0.71				ZNF679	ENSG00000197123.9	1.00	RP11-35J6.1	ENSG00000280665.1	0.79	ZBTB20-AS2	ENSG00000241295.1	0.86	TBX10	ENSG00000167800.9	0.78							RP11-442O18.2	ENSG00000224190.1	0.83
OR56A3	ENSG00000184478.6	0.78	TOX	ENSG00000198846.5	0.71				RP3-412A9.17	ENSG00000278920.1	1.00	LINC01087	ENSG00000224559.2	0.79	NTSR1	ENSG00000101188.4	0.86	RP11-564P9.1	ENSG00000244281.1	0.78							TCEB3C	ENSG00000183791.4	0.82
MS4A13	ENSG00000204979.7	0.78	PCNXL2	ENSG00000135749.18	0.71				PRR20C	ENSG00000229665.8	1.00	RP3-422G23.4	ENSG00000262543.1	0.79	NDP	ENSG00000124479.8	0.86	ESX1	ENSG00000123576.5	0.78							FRG2	ENSG00000205097.6	0.82
CTD-2299N12.1	ENSG00000278913.1	0.78	CTB-58E17.2	ENSG00000274996.1	0.71				RP11-472K22.1	ENSG00000248176.1	1.00	RP11-702C7.2	ENSG00000231388.1	0.79	GPR26	ENSG00000154478.3	0.86	LINC01413	ENSG00000260172.1	0.77							DMRTB1	ENSG00000143006.7	0.81
MAGEB6	ENSG00000176746.6	0.78	AC138035.1	ENSG00000250765.5	0.71				GDI2P1	ENSG00000229165.1	1.00	OR10AK1P	ENSG00000254807.1	0.79	SLC22A7	ENSG00000137204.14	0.86	TLX3	ENSG00000164438.5	0.77							RP11-304M2.3	ENSG00000255229.1	0.81
CTD-2647L4.1	ENSG00000254129.1	0.78	CATSPER2P1	ENSG00000205771.6	0.71				SPATA31D3	ENSG00000186788.12	1.00	RP11-1018N14.1	ENSG00000249383.1	0.79	RP11-677M24.1	ENSG00000277945.1	0.86	RP11-341G23.3	ENSG00000257766.1	0.77							RP5-901A4.5	ENSG00000255230.1	0.81
CHRNB3	ENSG00000147432.6	0.78	AL353997.3	ENSG00000279999.1	0.71				RP11-346D6.4	ENSG00000213657.3	1.00	RP11-502F1.1	ENSG00000279606.1	0.79	UBE2V1P3	ENSG00000229518.1	0.86	RP11-438C19.2	ENSG00000251132.1	0.77							RP11-93B14.4	ENSG00000223669.1	0.80
AC098973.1	ENSG00000229243.1	0.78	CTC-301O7.4	ENSG00000197813.5	0.71				CXorf51B	ENSG00000235699.2	1.00	AC004461.4	ENSG00000237347.2	0.79	SLC35F4	ENSG00000151812.14	0.86	GJA8	ENSG00000121634.5	0.77							AMMECR1LP1	ENSG00000233273.1	0.80
RP11-314N14.1	ENSG00000250102.5	0.78							RP11-167B3.1	ENSG00000259041.1	1.00	RP11-90K18.1	ENSG00000261178.2	0.79	STEAP1B	ENSG00000105889.14	0.86	KLK15	ENSG00000174562.13	0.77							RP13-582L3.4	ENSG00000258507.1	0.79
DEFB126	ENSG00000125788.5	0.78							RP11-703P11.1	ENSG00000270997.1	1.00	RP11-56L13.3	ENSG00000279997.1	0.79	IFNA21	ENSG00000137080.4	0.86	RP4-639J15.3	ENSG00000269446.2	0.77							RP11-845C23.3	ENSG00000267396.1	0.79
RP11-445P19.3	ENSG00000272827.1	0.78							RP11-8J23.1	ENSG00000235110.5	1.00	TFDP3	ENSG00000183434.9	0.79	IRAK2	ENSG00000134070.4	0.85	RP11-314N2.2	ENSG00000223728.3	0.77							GPR151	ENSG00000173250.2	0.78
AL109763.2	ENSG00000224141.5	0.78							RP11-424M21.1	ENSG00000249184.1	1.00	RP11-274H24.1	ENSG00000260239.1	0.79	KCNA1	ENSG00000111262.4	0.85	ORM1	ENSG00000229314.5	0.77							HS6ST3	ENSG00000185352.8	0.78
CTD-2026A21.1	ENSG00000279869.1	0.77							RP11-199H2.2	ENSG00000282265.1	1.00	CCDC140	ENSG00000163081.2	0.79	GLDC	ENSG00000178445.8	0.85	AL022344.2	ENSG00000232109.1	0.77							RP11-49K24.9	ENSG00000278674.1	0.76
LRRC37A11P	ENSG00000214553.9	0.77							RP11-433J20.2	ENSG00000227101.1	1.00	TUSC8	ENSG00000237361.2	0.79	RP11-429A20.3	ENSG00000256790.1	0.85	CTD-2312P21.1	ENSG00000240627.1	0.77							RP11-127B16.1	ENSG00000220908.2	0.76
RP11-205M5.3	ENSG00000280064.1	0.77							SPDYE22P	ENSG00000266537.1	1.00	CASC20	ENSG00000229876.1	0.79	RXFP3	ENSG00000182631.6	0.85	RP11-654E17.2	ENSG00000226774.1	0.77							RN7SKP72	ENSG00000199197.1	0.75
RP11-111F5.4	ENSG00000204802.3	0.77							AC019109.1	ENSG00000224826.1	1.00	RP11-443B7.2	ENSG00000237520.1	0.79	LINC01423	ENSG00000231231.5	0.85	RP11-386M24.6	ENSG00000260337.3	0.76							TCEB3CL	ENSG00000275553.2	0.75
CTC-278L1.1	ENSG00000251204.1	0.77							RP11-555G19.2	ENSG00000279046.1	1.00	AC006548.28	ENSG00000280156.1	0.79	COL23A1	ENSG00000050767.15	0.85	RP11-461F11.2	ENSG00000279091.1	0.76							RP11-1E11.2	ENSG00000229288.1	0.75
RP11-104G3.7	ENSG00000276692.1	0.77							RP11-328C8.5	ENSG00000258068.1	1.00	RPL31P35	ENSG00000232612.1	0.79	PTGER2	ENSG00000125384.6	0.85	RP11-381N20.2	ENSG00000249125.1	0.76							FAM181A-AS1	ENSG00000258584.1	0.75
AC144835.1	ENSG00000258483.2	0.77							RP11-107N7.1	ENSG00000253572.2	1.00	UBTFL8	ENSG00000224082.1	0.79	OTOS	ENSG00000178602.7	0.84	RP11-838N2.5	ENSG00000266578.1	0.76							GATA2-AS1	ENSG00000244300.2	0.75
LYPD6B	ENSG00000150556.16	0.77							RP11-79E3.2	ENSG00000250723.5	1.00	RP11-63B13.1	ENSG00000261501.1	0.79	GRIA1	ENSG00000155511.17	0.84	LINC00469	ENSG00000177338.13	0.76							DUX4L4	ENSG00000258834.4	0.75
RPL36AP40	ENSG00000240298.3	0.77							RP11-346C16.4	ENSG00000219559.1	1.00	RP11-398G24.2	ENSG00000254303.1	0.78	CALN1	ENSG00000183166.10	0.84	OR52R1	ENSG00000176937.9	0.76							TMED10P2	ENSG00000239405.1	0.75
CTD-2251F13.1	ENSG00000248975.2	0.77							AC068044.1	ENSG00000223691.1	1.00	RP11-162O12.1	ENSG00000240159.1	0.78	OR2A15P	ENSG00000239981.1	0.84	RP3-425P12.4	ENSG00000219682.4	0.76							OR2M2	ENSG00000198601.2	0.74
RP11-313M3.1	ENSG00000240975.1	0.76							CTB-23I7.3	ENSG00000271494.1	1.00	PGLYRP2	ENSG00000161031.12	0.78	NAGS	ENSG00000161653.10	0.84	KIF19	ENSG00000196169.14	0.76							RP11-501E14.1	ENSG00000249409.1	0.74
OR5M6P	ENSG00000254603.1	0.76							RP11-1437A8.3	ENSG00000260419.1	1.00	RP11-295P9.2	ENSG00000227474.1	0.78	C10orf90	ENSG00000154493.17	0.84	RP11-507B12.2	ENSG00000259616.2	0.76							RP11-820I16.2	ENSG00000267661.1	0.74
RP11-473M10.3	ENSG00000237378.2	0.76							CTD-2384A14.1	ENSG00000258038.5	1.00	RP11-378I6.1	ENSG00000261402.1	0.78	PLCXD3	ENSG00000182836.9	0.84	AC011523.2	ENSG00000267968.1	0.76							RP3-437I16.1	ENSG00000230523.1	0.73
CTD-2626G11.2	ENSG00000268416.1	0.76							OR5M4P	ENSG00000230416.3	1.00	MIP	ENSG00000135517.6	0.78	CACNA1A	ENSG00000141837.18	0.84	BOLL	ENSG00000152430.17	0.75							WIZP1	ENSG00000255293.1	0.73
SGCZ	ENSG00000185053.12	0.76							HIST1H4L	ENSG00000275126.1	1.00	AC013269.5	ENSG00000184761.7	0.78	GRM5	ENSG00000168959.14	0.84	GACAT3	ENSG00000236289.2	0.75							RP11-288C17.3	ENSG00000263396.1	0.73
AC016142.1	ENSG00000280141.1	0.76							FAM8A2P	ENSG00000254722.1	1.00	HELLPAR	ENSG00000281344.1	0.78	AC019048.1	ENSG00000223884.5	0.83	LINC01276	ENSG00000226917.5	0.75							GJC2	ENSG00000198835.3	0.72
RP11-579A4.1	ENSG00000274198.1	0.76							RP11-680N20.1	ENSG00000263450.1	1.00	CCNB3P1	ENSG00000249616.1	0.78	PDZRN3-AS1	ENSG00000239677.6	0.83	MS4A15	ENSG00000166961.14	0.75							RNF113B	ENSG00000139797.7	0.72
RP11-475I24.9	ENSG00000212952.6	0.76							PRAMEF18	ENSG00000279804.1	1.00	RP11-807E13.3	ENSG00000267656.1	0.78	RBPJ	ENSG00000168214.20	0.83	UBE2DNL	ENSG00000229547.4	0.75							LINC00659	ENSG00000228705.1	0.72
AL133335.1	ENSG00000280041.1	0.76							RP11-555K2.2	ENSG00000279783.1	1.00	LINC01297	ENSG00000274827.4	0.78	EBF2	ENSG00000221818.8	0.83	DDX11L16	ENSG00000227159.7	0.75							RP1-41C23.2	ENSG00000278977.1	0.72
NRG1	ENSG00000157168.18	0.76							PRR20B	ENSG00000204918.3	1.00	RP11-678K21.2	ENSG00000279209.1	0.78	RP11-58A18.2	ENSG00000274478.1	0.83	RP11-748L13.2	ENSG00000215409.4	0.75							LINC00982	ENSG00000177133.10	0.72
RP11-475I24.3	ENSG00000237357.2	0.75							LINC00879	ENSG00000239589.5	1.00	RP11-624D20.1	ENSG00000241537.1	0.78	RP11-958F21.1	ENSG00000264345.1	0.83	RP11-73M7.6	ENSG00000235790.7	0.75							CTD-2014E2.2	ENSG00000261648.1	0.72
RP11-962G15.1	ENSG00000253363.5	0.75							RP11-501C14.5	ENSG00000250838.1	1.00	BPESC1	ENSG00000232416.3	0.78	PGAM1P4	ENSG00000214041.4	0.83	AIFM3	ENSG00000183773.15	0.75							DLX1	ENSG00000144355.14	0.72
RP11-159D12.11	ENSG00000278642.1	0.75							UBE2Q2P9	ENSG00000244130.1	1.00	AL162151.4	ENSG00000229402.1	0.78	RP11-157B13.7	ENSG00000267872.1	0.83	RP11-159D23.2	ENSG00000257472.1	0.75							CORIN	ENSG00000145244.11	0.72
ADIRF-AS1	ENSG00000272734.1	0.75							RP5-1097F14.3	ENSG00000235710.4	1.00	RP11-66N5.2	ENSG00000225271.1	0.78	RP11-132E11.2	ENSG00000237153.1	0.82	OR52R1	ENSG00000279270.1	0.75							CMB9-52H4.1	ENSG00000280089.1	0.72
BNIP3P24	ENSG00000269040.1	0.75							AC015849.12	ENSG00000270829.1	1.00	RP11-354K4.1	ENSG00000231762.1	0.78	MYRIP	ENSG00000170011.13	0.82	RP11-708H21.1	ENSG00000240995.2	0.74							RN7SL787P	ENSG00000274098.1	0.71
RP11-211N8.2	ENSG00000226007.2	0.75							LINC01432	ENSG00000234435.2	1.00	CTCFL	ENSG00000124092.12	0.78	ANGPTL5	ENSG00000187151.7	0.82	CTD-2532D12.4	ENSG00000263574.1	0.74							RP11-345K9.2	ENSG00000279154.1	0.71
CTD-3012A18.1	ENSG00000255029.1	0.75							RP11-261C10.4	ENSG00000232085.1	1.00	RP11-223J15.2	ENSG00000229239.2	0.78	RP11-429A20.4	ENSG00000256654.2	0.82	OR4D10	ENSG00000254466.1	0.74							CTD-2544H17.1	ENSG00000249621.1	0.71
RP11-11N5.3	ENSG00000272218.1	0.75							RP11-14K3.4	ENSG00000261046.1	1.00	RP11-307A17.2	ENSG00000271519.1	0.78	XG	ENSG00000124343.12	0.82	INSL4	ENSG00000120211.4	0.74							RP11-707G14.1	ENSG00000256034.1	0.71
AC092013.1	ENSG00000227785.1	0.75							RP11-65B23.3	ENSG00000237747.1	1.00	RP11-368M16.10	ENSG00000270749.1	0.78	CTD-2006M22.2	ENSG00000278934.1	0.82	ITLN1	ENSG00000179914.4	0.74
CXCL17	ENSG00000189377.8	0.75							NOTCH2P1	ENSG00000226446.1	1.00	RP11-461H3.2	ENSG00000231368.1	0.78	ARHGAP22	ENSG00000128805.14	0.82	TSPY17P	ENSG00000232620.1	0.74
RP11-288C17.3	ENSG00000263396.1	0.75							LINC00485	ENSG00000258169.1	1.00	PSMC1P4	ENSG00000248781.1	0.78	AR	ENSG00000169083.15	0.82	LINC00930	ENSG00000258647.5	0.73
RP11-111F5.3	ENSG00000231212.1	0.75							CTB-164L20.1	ENSG00000232174.3	1.00	LINC00351	ENSG00000226317.2	0.78	RP11-390F4.2	ENSG00000232946.1	0.82	ZNF259P1	ENSG00000219565.2	0.73
DNAH12	ENSG00000174844.14	0.75							RP11-411H5.1	ENSG00000226715.1	1.00	RP11-363J17.1	ENSG00000256458.1	0.78	RP11-424I19.1	ENSG00000259365.1	0.82	OR51H2P	ENSG00000198217.3	0.73
FAM138B	ENSG00000226516.7	0.75							PRR13P7	ENSG00000271202.1	1.00	RP1-17K7.2	ENSG00000254584.1	0.78	PAPL	ENSG00000183760.10	0.82	SPATA42	ENSG00000203897.3	0.73
LINC00677	ENSG00000259717.1	0.74							RPL27AP8	ENSG00000229423.2	1.00	OR4K2	ENSG00000165762.2	0.78	MAS1L	ENSG00000204687.4	0.81	AP006748.1	ENSG00000223400.1	0.73
BCRP9	ENSG00000271287.1	0.74							RP11-94P11.4	ENSG00000254998.1	1.00	RP11-358L22.2	ENSG00000261776.1	0.78	RP4-781K5.4	ENSG00000228044.2	0.81	AC114755.3	ENSG00000227513.1	0.73
RP11-116O11.1	ENSG00000251294.1	0.74							RP11-373E16.1	ENSG00000213174.3	1.00	DDX39AP1	ENSG00000225777.1	0.78	FAM180B	ENSG00000196666.4	0.81	LINC01079	ENSG00000229609.1	0.72
SOX2-OT	ENSG00000242808.7	0.74							WFDC6	ENSG00000243543.8	1.00	OR7E55P	ENSG00000230655.3	0.78	MIAT_exon1	ENSG00000278404.1	0.81	NXPE4	ENSG00000137634.9	0.72
CNN2P3	ENSG00000235832.2	0.74							CTD-2571L23.8	ENSG00000268746.1	1.00	RP11-415C15.1	ENSG00000251080.1	0.78	ADAMTSL1	ENSG00000178031.15	0.80	AC104654.1	ENSG00000214691.7	0.72
OXTR	ENSG00000180914.10	0.74							NF1P7	ENSG00000278143.1	1.00	RP11-702F3.4	ENSG00000255269.1	0.78	DPF3	ENSG00000205683.11	0.80	CALML3-AS1	ENSG00000205488.8	0.72
CYP4F22	ENSG00000171954.12	0.74							RPSAP34	ENSG00000239939.1	1.00	RP11-216P6.2	ENSG00000275997.1	0.78	VEPH1	ENSG00000197415.11	0.80	RP11-358M11.4	ENSG00000260870.1	0.72
RP11-288C17.1	ENSG00000265417.1	0.74							AC006004.1	ENSG00000236795.1	1.00	RP11-19G24.1	ENSG00000274308.1	0.78	NOX3	ENSG00000074771.3	0.80	CIB4	ENSG00000157884.10	0.72
SMIM22	ENSG00000267795.5	0.74							RP11-476H20.1	ENSG00000231714.1	1.00	RPL7P61	ENSG00000230282.1	0.78	PALM3	ENSG00000187867.8	0.80	RP11-512C24.3	ENSG00000177596.1	0.72
RP11-3B12.5	ENSG00000224899.1	0.73							RPS18P6	ENSG00000244048.1	1.00	LINC01533	ENSG00000267779.5	0.78	PRRX1	ENSG00000116132.11	0.80	TMEM210	ENSG00000185863.7	0.71

## Sheet: LINC00526
ACC Tumor			CHOL Tumor			KICH Tumor			PAAD Tumor			PCPG Tumor			TGCT Tumor			THYM Tumor			UVM Tumor
YTHDC1	ENSG00000083896.12	0.72	CCDC108	ENSG00000181378.13	0.95	ARHGAP5-AS1	ENSG00000258655.2	0.79	RP11-81A22.4	ENSG00000280254.1	0.88	ZBTB14	ENSG00000198081.10	0.81	CAPN7	ENSG00000131375.9	0.86	BRD2	ENSG00000204256.12	0.88	RP11-352M15.2	ENSG00000273015.2	0.90
C9orf91	ENSG00000157693.14	0.72	KIF5C	ENSG00000168280.16	0.94	RP11-412D9.4	ENSG00000260329.1	0.72	RP11-71L14.4	ENSG00000274698.1	0.87	ASB8	ENSG00000177981.10	0.75	FTOP1	ENSG00000226491.1	0.85	BRPF1	ENSG00000156983.15	0.87	SECISBP2	ENSG00000187742.14	0.87
ZBTB6	ENSG00000186130.4	0.72	RP11-1267H10.4	ENSG00000248635.1	0.94	RP11-390E23.6	ENSG00000272686.1	0.72	KCNJ3	ENSG00000162989.4	0.87	RP11-412D9.4	ENSG00000260329.1	0.75	RXRA	ENSG00000186350.9	0.84	LINC01560	ENSG00000196741.5	0.87	NBPF19	ENSG00000271383.6	0.87
EXD2	ENSG00000081177.18	0.72	UGT2A3	ENSG00000135220.10	0.93	PARP2	ENSG00000129484.13	0.72	RSPH9	ENSG00000172426.15	0.86	ZFP90	ENSG00000184939.15	0.75	MAML3	ENSG00000196782.12	0.84	SELENOF	ENSG00000183291.15	0.87	PHOSPHO2	ENSG00000144362.11	0.87
ZBTB49	ENSG00000168826.15	0.71	RP11-511B23.3	ENSG00000258171.1	0.93	RP11-87H9.5	ENSG00000279456.1	0.72	FAM47E	ENSG00000189157.13	0.86	LINC00909	ENSG00000264247.1	0.75	FOXA1	ENSG00000129514.5	0.83	WBP4	ENSG00000120688.8	0.86	RP11-46C24.7	ENSG00000259877.2	0.87
TRIM32	ENSG00000119401.10	0.71	ARRB2	ENSG00000141480.17	0.92	LINC00339	ENSG00000218510.5	0.71	RP11-156E6.1	ENSG00000259623.1	0.86	KAT6B	ENSG00000156650.12	0.74	RP11-384L8.1	ENSG00000261572.1	0.83	AC007383.3	ENSG00000227946.1	0.86	HACE1	ENSG00000085382.11	0.87
NOA1	ENSG00000084092.6	0.71	RP4-724E13.2	ENSG00000228204.2	0.92	LINC00667	ENSG00000263753.6	0.70	ZNF793-AS1	ENSG00000266916.5	0.86	CENPBD1	ENSG00000177946.5	0.74	ANKMY2	ENSG00000106524.8	0.82	EIF1B	ENSG00000114784.3	0.85	GABARAPL2	ENSG00000034713.7	0.86
ERCC6L2	ENSG00000182150.15	0.71	LINC00189	ENSG00000215533.8	0.92	ZNF566	ENSG00000186017.14	0.70	PEMT	ENSG00000133027.17	0.85	CSRP2BP	ENSG00000149474.13	0.74	GORASP1	ENSG00000114745.13	0.82	C1orf174	ENSG00000198912.10	0.85	MED10	ENSG00000133398.3	0.86
KLHL28	ENSG00000179454.13	0.70	SLC13A4	ENSG00000164707.15	0.92	FAM156A	ENSG00000268350.7	0.70	CTD-2517O10.6	ENSG00000272323.1	0.85	RAE1	ENSG00000101146.12	0.73	RPH3AL	ENSG00000181031.15	0.82	OARD1	ENSG00000124596.16	0.85	WHAMM	ENSG00000156232.7	0.86
ZSCAN25	ENSG00000197037.10	0.70	NAT8B	ENSG00000204872.3	0.92	TTC28-AS1	ENSG00000235954.6	0.70	AMER3	ENSG00000178171.10	0.85	ZKSCAN2	ENSG00000155592.15	0.73	TSPY26P	ENSG00000235217.6	0.81	HDHD2	ENSG00000167220.11	0.85	MBIP	ENSG00000151332.18	0.85
RP11-379H18.1	ENSG00000271122.1	0.70	SCAMP5	ENSG00000198794.11	0.92	PTOV1-AS1	ENSG00000268006.1	0.70	CDK5R2	ENSG00000171450.5	0.85	AC002310.14	ENSG00000278922.1	0.73	SLC46A1	ENSG00000076351.12	0.81	RHOA	ENSG00000067560.10	0.85	AK9	ENSG00000155085.15	0.85
MTF1	ENSG00000188786.9	0.70	AZGP1P2	ENSG00000214252.4	0.92	ESCO1	ENSG00000141446.10	0.70	CXXC4	ENSG00000168772.10	0.85	USP30	ENSG00000135093.12	0.73	ID2-AS1	ENSG00000235092.5	0.81	RDH14	ENSG00000240857.1	0.85	NBPF12	ENSG00000268043.7	0.85
ENTPD5	ENSG00000187097.12	0.70	BSN	ENSG00000164061.4	0.92				PART1	ENSG00000152931.7	0.85	BPTF	ENSG00000171634.16	0.73	GATA6	ENSG00000141448.8	0.81	AKIRIN2	ENSG00000135334.8	0.84	ATG5	ENSG00000057663.12	0.85
ZNF618	ENSG00000157657.14	0.70	SIAH1	ENSG00000196470.11	0.91				CTD-2587H24.10	ENSG00000267649.1	0.84	EIF3J-AS1	ENSG00000179523.4	0.72	SH3D19	ENSG00000109686.16	0.80	USP10	ENSG00000103194.15	0.84	EIF3J-AS1	ENSG00000179523.4	0.85
CTD-2630F21.1	ENSG00000267309.1	0.70	SYPL2	ENSG00000143028.8	0.91				RAP1GAP2	ENSG00000132359.13	0.84	ZNF689	ENSG00000156853.11	0.72	RP11-185E8.2	ENSG00000279673.1	0.80	POLR2C	ENSG00000102978.12	0.84	DOPEY1	ENSG00000083097.14	0.85
			AC079354.3	ENSG00000222035.3	0.91				PDZD4	ENSG00000067840.12	0.84	MTMR4	ENSG00000108389.9	0.72	TP53I3	ENSG00000115129.13	0.80	RAB28	ENSG00000157869.14	0.84	GABPB1-AS1	ENSG00000244879.4	0.84
			AVPR1A	ENSG00000166148.3	0.91				SLC25A5-AS1	ENSG00000224281.4	0.84	LINC00667	ENSG00000263753.6	0.72	LINC00667	ENSG00000263753.6	0.80	WDR82	ENSG00000164091.11	0.84	RP11-390E23.6	ENSG00000272686.1	0.84
			ACE	ENSG00000159640.14	0.91				RP11-506F3.1	ENSG00000282033.1	0.84	ZSWIM1	ENSG00000168612.4	0.72	CTNNB1	ENSG00000168036.16	0.80	ANAPC10	ENSG00000164162.12	0.84	TAB2	ENSG00000055208.17	0.84
			PHF21B	ENSG00000056487.15	0.91				GS1-358P8.4	ENSG00000260822.1	0.84	NFXL1	ENSG00000170448.11	0.72	ACOX2	ENSG00000168306.12	0.80	ZNF212	ENSG00000170260.8	0.84	TCAF1	ENSG00000198420.9	0.84
			LRAT	ENSG00000121207.11	0.91				CNBD2	ENSG00000149646.12	0.84	ZNF658	ENSG00000274349.4	0.72	DCBLD2	ENSG00000057019.15	0.80	DCP1B	ENSG00000151065.13	0.83	CCP110	ENSG00000103540.16	0.84
			THRB-AS1	ENSG00000228791.7	0.91				BRSK1	ENSG00000160469.16	0.84	ZNF14	ENSG00000105708.8	0.72	ZNF629	ENSG00000102870.5	0.80	TGDS	ENSG00000088451.10	0.83	ZFP90	ENSG00000184939.15	0.84
			LINC00612	ENSG00000214851.4	0.91				SARM1	ENSG00000004139.13	0.84	BBS12	ENSG00000181004.9	0.72	EPHA4	ENSG00000116106.11	0.80	SNIP1	ENSG00000163877.9	0.83	RAB12	ENSG00000206418.3	0.84
			BTNL8	ENSG00000113303.11	0.91				MXD4	ENSG00000123933.14	0.84	ZNF180	ENSG00000167384.10	0.72	CHDH	ENSG00000016391.10	0.80	FBXL5	ENSG00000118564.14	0.83	CHD2	ENSG00000173575.18	0.84
			TIMP4	ENSG00000157150.4	0.91				PCDHB1	ENSG00000171815.5	0.84	BRD3	ENSG00000169925.16	0.71	TFG	ENSG00000114354.12	0.80	TMEM18	ENSG00000151353.14	0.83	CRY1	ENSG00000008405.11	0.84
			RP11-69H7.2	ENSG00000260660.1	0.91				RP11-307O13.1	ENSG00000261728.1	0.84	CEP83-AS1	ENSG00000278916.1	0.71	PXYLP1	ENSG00000155893.11	0.80	STK24	ENSG00000102572.14	0.83	KPNA5	ENSG00000196911.9	0.84
			RP1-30E17.2	ENSG00000225689.1	0.91				FAM222A	ENSG00000139438.5	0.83	SETD1A	ENSG00000099381.16	0.71	RP11-708J19.1	ENSG00000260236.1	0.80	MPPE1	ENSG00000154889.16	0.83	SMIM8	ENSG00000111850.10	0.84
			RP11-883G14.3	ENSG00000260605.1	0.91				RP11-74E22.8	ENSG00000277200.1	0.83	ZNF174	ENSG00000103343.12	0.71	F10	ENSG00000126218.11	0.80	WDR48	ENSG00000114742.13	0.83	MGEA5	ENSG00000198408.13	0.84
			CES2	ENSG00000172831.11	0.91				CTA-445C9.14	ENSG00000261188.1	0.83	RP11-46C24.7	ENSG00000259877.2	0.71	ACKR3	ENSG00000144476.5	0.79	KATNA1	ENSG00000186625.13	0.83	CMTR2	ENSG00000180917.16	0.83
			TSPYL2	ENSG00000184205.14	0.91				ADGRG5	ENSG00000159618.15	0.83	BRAP	ENSG00000089234.15	0.71	CTD-2308L22.1	ENSG00000272944.1	0.79	DET1	ENSG00000140543.13	0.83	NBPF11	ENSG00000263956.5	0.83
			DENND2C	ENSG00000175984.14	0.91				RP11-345P4.9	ENSG00000272106.1	0.83	RP11-507K2.3	ENSG00000258789.1	0.71	OXER1	ENSG00000162881.6	0.79	C6orf62	ENSG00000112308.12	0.83	CEP120	ENSG00000168944.15	0.83
			ZC3H11B	ENSG00000215817.4	0.91				KIF1A	ENSG00000130294.14	0.83	ZNF510	ENSG00000081386.12	0.71	RP11-627G18.1	ENSG00000266283.1	0.79	FOCAD	ENSG00000188352.12	0.83	FAM206A	ENSG00000119328.11	0.83
			SLC13A2	ENSG00000007216.14	0.91				RP11-524F11.1	ENSG00000265511.1	0.83	BBS4	ENSG00000140463.13	0.71	AGPAT3	ENSG00000160216.18	0.79	POLDIP3	ENSG00000100227.17	0.83	RP1-39G22.7	ENSG00000259943.1	0.83
			RP11-513O17.3	ENSG00000253614.1	0.91				UNC79	ENSG00000133958.13	0.83	RNF34	ENSG00000170633.16	0.71	LINC00574	ENSG00000231690.2	0.79	ZNF407	ENSG00000215421.9	0.83	RP3-467N11.1	ENSG00000260000.2	0.83
			CXXC4	ENSG00000168772.10	0.91				MSI1	ENSG00000135097.6	0.83	PRR12	ENSG00000126464.13	0.71	SH3RF1	ENSG00000154447.14	0.79	RRAGA	ENSG00000155876.5	0.83	PHF3	ENSG00000118482.11	0.83
			MYO1A	ENSG00000166866.12	0.91				SCAMP5	ENSG00000198794.11	0.83	ZXDB	ENSG00000198455.4	0.71	ARL15	ENSG00000185305.10	0.78	ZKSCAN4	ENSG00000187626.8	0.83	TRDMT1	ENSG00000107614.21	0.83
			SPTBN4	ENSG00000160460.15	0.91				RPH3AL	ENSG00000181031.15	0.83	ZNF112	ENSG00000062370.16	0.71	PLEKHA6	ENSG00000143850.12	0.78	ATP9B	ENSG00000166377.19	0.82	SLC25A14	ENSG00000102078.15	0.83
			SMPDL3A	ENSG00000172594.12	0.91				SNAP25	ENSG00000132639.12	0.83	CTD-2192J16.20	ENSG00000269693.1	0.70	RP11-273B20.1	ENSG00000256967.1	0.78	ANKRD11	ENSG00000167522.14	0.82	TAB3	ENSG00000157625.15	0.83
			RAPGEF4	ENSG00000091428.17	0.91				SYT4	ENSG00000132872.11	0.83	KDM2B	ENSG00000089094.16	0.70	SLC39A9	ENSG00000029364.11	0.78	USP11	ENSG00000102226.9	0.82	CAPN7	ENSG00000131375.9	0.83
			SLC29A1	ENSG00000112759.16	0.91				EID2B	ENSG00000176401.5	0.83	CBFA2T2	ENSG00000078699.21	0.70	AJUBA	ENSG00000129474.15	0.78	LINC00909	ENSG00000264247.1	0.82	PPIL4	ENSG00000131013.3	0.82
			HMGCS2	ENSG00000134240.11	0.91				JPH3	ENSG00000154118.12	0.83	ZNF182	ENSG00000147118.10	0.70	LA16c-313D11.12	ENSG00000261659.2	0.78	CFAP20	ENSG00000070761.7	0.82	LATS1	ENSG00000131023.12	0.82
			APOBEC3A	ENSG00000128383.12	0.91				MAPK8IP2	ENSG00000008735.13	0.82	AP001372.2	ENSG00000254837.2	0.70	NPC1L1	ENSG00000015520.14	0.78	CWC22	ENSG00000163510.13	0.82	LINC01003	ENSG00000261455.1	0.82
			TMEM145	ENSG00000167619.11	0.91				CHRNB2	ENSG00000160716.4	0.82	RP11-710C12.1	ENSG00000271474.1	0.70	ABCC6	ENSG00000091262.14	0.78	SNRNP27	ENSG00000124380.10	0.82	ZNF23	ENSG00000167377.17	0.82
			RP5-856G1.2	ENSG00000176515.1	0.91				RP11-352M15.2	ENSG00000273015.2	0.82	ZMYM3	ENSG00000147130.14	0.70	ABCC6P1	ENSG00000256340.8	0.78	DDX19A	ENSG00000168872.15	0.82	RBL2	ENSG00000103479.14	0.82
			INHA	ENSG00000123999.4	0.91				ZNF674-AS1	ENSG00000230844.2	0.82	SENP1	ENSG00000079387.13	0.70	ID2	ENSG00000115738.9	0.78	C1orf52	ENSG00000162642.13	0.82	WDSUB1	ENSG00000196151.10	0.82
			ERO1LB	ENSG00000086619.13	0.91				CACNG2	ENSG00000166862.6	0.82	C17orf80	ENSG00000141219.15	0.70	RP11-458J1.1	ENSG00000278834.1	0.78	CAPN7	ENSG00000131375.9	0.82	ZNF767P	ENSG00000133624.13	0.82
			SLC4A3	ENSG00000114923.16	0.91				SRCIN1	ENSG00000277363.4	0.82	BBS10	ENSG00000179941.6	0.70	EFNA1	ENSG00000169242.11	0.78	PDCD7	ENSG00000090470.14	0.82	TMEM30A	ENSG00000112697.15	0.82
			DLGAP1-AS5	ENSG00000261520.5	0.91				RP1-39G22.7	ENSG00000259943.1	0.82	DCLRE1A	ENSG00000198924.7	0.70	SOWAHB	ENSG00000186212.3	0.78	DYNC1I2	ENSG00000077380.15	0.82	ARHGAP21	ENSG00000107863.16	0.82
			RP1-153P14.8	ENSG00000204110.6	0.91				FGF14	ENSG00000102466.15	0.82	KLLN	ENSG00000227268.3	0.70	ZFPM1	ENSG00000179588.8	0.78	RAF1	ENSG00000132155.11	0.82	PCMTD2	ENSG00000203880.11	0.82
			SLC7A9	ENSG00000021488.12	0.91				ELAC1	ENSG00000141642.8	0.82	ZBTB6	ENSG00000186130.4	0.70	HSPA12A	ENSG00000165868.12	0.78	INIP	ENSG00000148153.13	0.81	ZNF839	ENSG00000022976.15	0.82
			LINC01549	ENSG00000232560.6	0.91				SMIM6	ENSG00000259120.2	0.82	SALL2	ENSG00000165821.11	0.70	IL17RB	ENSG00000056736.9	0.78	AC004987.9	ENSG00000233225.3	0.81	FAM135A	ENSG00000082269.16	0.82
			PKDCC	ENSG00000162878.12	0.91				AP3B2	ENSG00000103723.12	0.82	LSM14B	ENSG00000149657.19	0.70	LPGAT1	ENSG00000123684.12	0.77	MED4	ENSG00000136146.14	0.81	GOPC	ENSG00000047932.13	0.82
			CASC22	ENSG00000260887.2	0.91				UNC80	ENSG00000144406.18	0.82	SLX4IP	ENSG00000149346.14	0.70	UGDH	ENSG00000109814.11	0.77	AKAP17A	ENSG00000197976.10	0.81	MAP3K7	ENSG00000135341.17	0.82
			TBL1XR1	ENSG00000177565.15	0.91				PELI3	ENSG00000174516.14	0.82	HCFC1	ENSG00000172534.13	0.70	SMIM6	ENSG00000259120.2	0.77	CCNI	ENSG00000118816.9	0.81	TRMT11	ENSG00000066651.17	0.82
			AC023115.2	ENSG00000235885.7	0.90				TMEM198	ENSG00000188760.10	0.82	TIGD2	ENSG00000180346.3	0.70	LINC00242	ENSG00000229214.1	0.77	RP11-932O9.7	ENSG00000247728.2	0.81	RP11-398K22.12	ENSG00000229852.2	0.82
			HMP19	ENSG00000170091.10	0.90				LINC00683	ENSG00000266256.1	0.82	ZKSCAN4	ENSG00000187626.8	0.70	RNF208	ENSG00000212864.3	0.77	WIPI2	ENSG00000157954.14	0.81	IBTK	ENSG00000005700.14	0.82
			NKAIN1	ENSG00000084628.9	0.90				RP11-16N11.2	ENSG00000260572.1	0.81	ZNF33B	ENSG00000196693.14	0.70	FAM109A	ENSG00000198324.13	0.77	ESCO1	ENSG00000141446.10	0.81	KLHDC1	ENSG00000197776.7	0.82
			LINC00675	ENSG00000263429.3	0.90				COQ10A	ENSG00000135469.13	0.81	RIC8B	ENSG00000111785.18	0.70	VEZT	ENSG00000028203.17	0.77	ILF3	ENSG00000129351.17	0.81	RP11-7F17.8	ENSG00000273729.1	0.82
			COBL	ENSG00000106078.17	0.90				CAMK2B	ENSG00000058404.19	0.81				RP11-81A22.4	ENSG00000280254.1	0.77	ATXN7L3B	ENSG00000253719.3	0.81	INSIG2	ENSG00000125629.14	0.82
			HSD3B1	ENSG00000203857.9	0.90				CTD-2047H16.5	ENSG00000276863.1	0.81				TAS2R20	ENSG00000255837.1	0.77	PPIL4	ENSG00000131013.3	0.81	ZC3H6	ENSG00000188177.13	0.82
			CPNE6	ENSG00000100884.9	0.90				FBXL16	ENSG00000127585.11	0.81				KRT19	ENSG00000171345.13	0.77	BBS9	ENSG00000122507.20	0.81	SENP6	ENSG00000112701.17	0.82
			SYP	ENSG00000102003.10	0.90				WDR17	ENSG00000150627.15	0.81				KIAA1147	ENSG00000257093.6	0.77	TERF2	ENSG00000132604.10	0.81	LNPEP	ENSG00000113441.15	0.81
			RP5-1029K10.2	ENSG00000249906.1	0.90				ST8SIA3	ENSG00000177511.5	0.81				TCF7L2	ENSG00000148737.15	0.77	RP11-46C24.7	ENSG00000259877.2	0.81	CDKN1B	ENSG00000111276.10	0.81
			DSC1	ENSG00000134765.9	0.90				HMGA1P8	ENSG00000233155.1	0.81				HS2ST1	ENSG00000153936.16	0.77	CSNK2A2	ENSG00000070770.8	0.81	SENP5	ENSG00000119231.10	0.81
			GRAMD4	ENSG00000075240.16	0.90				CIRBP	ENSG00000099622.13	0.81				PHYHD1	ENSG00000175287.18	0.77	IST1	ENSG00000182149.20	0.81	DUSP12	ENSG00000081721.11	0.81
			TNR	ENSG00000116147.16	0.90				STXBP5L	ENSG00000145087.12	0.81				CAPN9	ENSG00000135773.12	0.77	MTERF4	ENSG00000122085.16	0.81	CAPRIN2	ENSG00000110888.17	0.81
			SLFNL1-AS1	ENSG00000281207.1	0.90				PRRT3	ENSG00000163704.11	0.81				SRC	ENSG00000197122.11	0.77	RP11-87H9.2	ENSG00000276291.4	0.81	DUT	ENSG00000128951.13	0.81
			CAMKV	ENSG00000164076.16	0.90				DSCAML1	ENSG00000177103.13	0.81				RP11-1275H24.3	ENSG00000273084.1	0.77	UBAP1	ENSG00000165006.13	0.81	RP11-77K12.9	ENSG00000274220.1	0.81
			GRPR	ENSG00000126010.5	0.90				MS4A8	ENSG00000166959.7	0.81				TMEM216	ENSG00000187049.9	0.77	SLC35A1	ENSG00000164414.16	0.81	QKI	ENSG00000112531.16	0.81
			CHRNB2	ENSG00000160716.4	0.90				XKR7	ENSG00000260903.2	0.81				ACVR2B-AS1	ENSG00000229589.1	0.77	NUP54	ENSG00000138750.14	0.81	SECISBP2L	ENSG00000138593.8	0.81
			WFDC5	ENSG00000175121.11	0.90				NOVA1	ENSG00000139910.19	0.81				SGMS1-AS1	ENSG00000226200.6	0.77	TAF7	ENSG00000178913.7	0.81	MCM9	ENSG00000111877.17	0.81
			IL1RN	ENSG00000136689.18	0.90				RP11-423H2.3	ENSG00000249684.5	0.81				LZTS2	ENSG00000107816.17	0.77	FOPNL	ENSG00000133393.12	0.81	PEX1	ENSG00000127980.15	0.81
			AP000472.2	ENSG00000233215.5	0.90				RP11-468E2.10	ENSG00000276698.1	0.81				SMARCA1	ENSG00000102038.15	0.77	PNRC2	ENSG00000189266.11	0.81	MDM1	ENSG00000111554.14	0.81
			DUOX2	ENSG00000140279.12	0.90				NLK	ENSG00000087095.12	0.81				TSPAN3	ENSG00000140391.14	0.76	SLC4A1AP	ENSG00000163798.13	0.81	KATNA1	ENSG00000186625.13	0.81
			RP11-66N24.3	ENSG00000258727.1	0.90				RP1-267D11.6	ENSG00000277283.1	0.81				FAM111B	ENSG00000189057.10	0.76	SPAG16	ENSG00000144451.18	0.81	C20orf194	ENSG00000088854.12	0.81
			CTD-2515H24.2	ENSG00000276772.1	0.90				TRAM1L1	ENSG00000174599.5	0.81				AC142472.6	ENSG00000276728.1	0.76	HNRNPDL	ENSG00000152795.17	0.81	FLJ37453	ENSG00000179743.4	0.81
			RP11-256I23.3	ENSG00000267919.1	0.90				ZNF599	ENSG00000153896.17	0.81				KITLG	ENSG00000049130.13	0.76	MBTPS1	ENSG00000140943.16	0.80	ZNF292	ENSG00000188994.12	0.81
			SEZ6	ENSG00000063015.19	0.90				WNK3	ENSG00000196632.10	0.81				PKDCC	ENSG00000162878.12	0.76	ZC3H7A	ENSG00000122299.11	0.80	ZFP28	ENSG00000196867.7	0.81
			SLC25A34	ENSG00000162461.7	0.90				RP1-265C24.8	ENSG00000261839.1	0.81				TNRC18P1	ENSG00000249661.1	0.76	CRBN	ENSG00000113851.13	0.80	CEP63	ENSG00000182923.16	0.81
			MAGEH1	ENSG00000187601.4	0.90				STK33	ENSG00000130413.15	0.81				RP5-968P14.2	ENSG00000260063.1	0.76	DDX1	ENSG00000079785.14	0.80	TAF9B	ENSG00000187325.4	0.81
			RP11-587P21.2	ENSG00000257893.2	0.90				AC005281.2	ENSG00000225606.1	0.81				TAS2R15P	ENSG00000212125.2	0.76	C9orf64	ENSG00000165118.14	0.80	DNAJC3-AS1	ENSG00000247400.3	0.81
			FABP7	ENSG00000164434.11	0.90				TSGA10	ENSG00000135951.14	0.81				ELAC1	ENSG00000141642.8	0.76	ZNF17	ENSG00000186272.12	0.80	MALT1	ENSG00000172175.12	0.81
			RP11-91H12.1	ENSG00000280068.1	0.90				RP11-1017G21.6	ENSG00000272444.1	0.81				SLC25A21-AS1	ENSG00000258708.1	0.76	EIF4H	ENSG00000106682.14	0.80	UCKL1	ENSG00000198276.13	0.81
			RP1-302G2.5	ENSG00000262179.2	0.90				CFAP70	ENSG00000156042.17	0.80				RP11-793H13.11	ENSG00000270175.1	0.76	PPP1R8	ENSG00000117751.17	0.80	MBTD1	ENSG00000011258.15	0.81
			RP11-66N24.4	ENSG00000157306.14	0.90				PAM	ENSG00000145730.20	0.80				FZD7	ENSG00000155760.2	0.76	CAT	ENSG00000121691.4	0.80	HSDL1	ENSG00000103160.11	0.81
			RP11-15B24.5	ENSG00000228430.8	0.90				CTXN2	ENSG00000233932.4	0.80				TMEM98	ENSG00000006042.11	0.76	WTAP	ENSG00000146457.14	0.80	PRKAG2	ENSG00000106617.13	0.81
			FAM25C	ENSG00000276430.2	0.90				RFX2	ENSG00000087903.12	0.80				ZBED3	ENSG00000132846.5	0.76	EIF3J-AS1	ENSG00000179523.4	0.80	LINC01560	ENSG00000196741.5	0.81
			CGNL1	ENSG00000128849.10	0.90				RUNDC3A-AS1	ENSG00000267750.5	0.80				C1RL-AS1	ENSG00000205885.7	0.76	GPALPP1	ENSG00000133114.17	0.80	ZMYND11	ENSG00000015171.18	0.81
			GPM6B	ENSG00000046653.14	0.90				LINC00957	ENSG00000235314.1	0.80				SHANK2	ENSG00000162105.16	0.76	ZNF319	ENSG00000166188.2	0.80	NR3C1	ENSG00000113580.14	0.81
			RP11-384P7.7	ENSG00000260947.1	0.90				ICA1L	ENSG00000163596.16	0.80				GATA6-AS1	ENSG00000266010.1	0.76	GABPB1-AS1	ENSG00000244879.4	0.80	ZBED5	ENSG00000236287.7	0.81
			LINC00844	ENSG00000237949.1	0.90				HNF1A-AS1	ENSG00000241388.4	0.80				HPN	ENSG00000105707.13	0.76	RP11-412D9.4	ENSG00000260329.1	0.80	ANKS3	ENSG00000168096.14	0.81
			C1orf111	ENSG00000171722.11	0.90				ILF3-AS1	ENSG00000267100.1	0.80				TTC30B	ENSG00000196659.9	0.76	SIAH1	ENSG00000196470.11	0.80	EID1	ENSG00000255302.3	0.81
			LPA	ENSG00000198670.11	0.90				ADGRL1	ENSG00000072071.16	0.80				PRTFDC1	ENSG00000099256.18	0.76	GNB1	ENSG00000078369.17	0.80	MED23	ENSG00000112282.17	0.80
			USP51	ENSG00000247746.4	0.90				MDP1	ENSG00000213920.8	0.80				FLRT3	ENSG00000125848.9	0.76	GOLGA7	ENSG00000147533.16	0.80	ZNF248	ENSG00000198105.11	0.80
			OPCML-IT1	ENSG00000254896.1	0.90				TCEAL2	ENSG00000184905.8	0.80				STK24-AS1	ENSG00000224418.1	0.76	C11orf57	ENSG00000150776.17	0.80	SHPRH	ENSG00000146414.15	0.80
			HPCAL4	ENSG00000116983.12	0.90				RP11-567M16.6	ENSG00000274828.1	0.80				TNIK	ENSG00000154310.16	0.76	PUS10	ENSG00000162927.13	0.80	KRBOX4	ENSG00000147121.15	0.80
			CEACAM16	ENSG00000213892.10	0.90				C2orf81	ENSG00000159239.11	0.80				CTDSP1	ENSG00000144579.7	0.76	RNF214	ENSG00000167257.10	0.80	RP5-1068E13.7	ENSG00000273148.1	0.80
			RP11-448G15.1	ENSG00000250413.1	0.90				TMEM179	ENSG00000258986.6	0.80				TADA3	ENSG00000171148.13	0.76	PRKRIR	ENSG00000137492.7	0.80	AKTIP	ENSG00000166971.16	0.80
			DLG2	ENSG00000150672.16	0.90				RP11-1275H24.3	ENSG00000273084.1	0.80				LEPROT	ENSG00000213625.8	0.76	ZNF776	ENSG00000152443.12	0.80	ZSCAN30	ENSG00000186814.12	0.80
			TAS1R3	ENSG00000169962.4	0.90				C21orf58	ENSG00000160298.17	0.80				SPAG16	ENSG00000144451.18	0.76	GPBP1L1	ENSG00000159592.10	0.80	ZNF658	ENSG00000274349.4	0.80
			A2MP1	ENSG00000256069.7	0.90				TSPYL4	ENSG00000187189.10	0.80				MYRF	ENSG00000124920.13	0.75	RXRB	ENSG00000204231.10	0.80	CASD1	ENSG00000127995.16	0.80

## Sheet: LINC00667
ACC Tumor			CHOL Tumor			KICH Tumor			KIRC Tumor			KIRP Tumor			LGG Tumor			PAAD Tumor			PCPG Tumor			PRAD Tumor			TGCT Tumor			THCA Tumor			THYM Tumor			UCS Tumor			UVM Tumor
VPS4B	ENSG00000119541.9	0.82	XX-FW83563B9.5	ENSG00000280195.1	0.82	MBD1	ENSG00000141644.17	0.85	KIAA1468	ENSG00000134444.13	0.77	ADNP2	ENSG00000101544.8	0.80	SMCHD1	ENSG00000101596.14	0.80	LINC00526	ENSG00000264575.1	0.77	RGP1	ENSG00000107185.9	0.80	SP2	ENSG00000167182.12	0.76	KHNYN	ENSG00000100441.9	0.80	MBD1	ENSG00000141644.17	0.84	BRD4	ENSG00000141867.17	0.92	LINC00526	ENSG00000264575.1	0.78	SUCLA2	ENSG00000136143.13	0.92
DDX3X	ENSG00000215301.9	0.80	LINC00299	ENSG00000236790.5	0.81	ELAC1	ENSG00000141642.8	0.84	HDHD2	ENSG00000167220.11	0.75	ZBTB14	ENSG00000198081.10	0.76	ZBTB14	ENSG00000198081.10	0.76	KIAA1109	ENSG00000138688.15	0.76	TNKS2	ENSG00000107854.5	0.79	ANKS1A	ENSG00000064999.13	0.74	LINC00526	ENSG00000264575.1	0.80	OSBPL2	ENSG00000130703.15	0.79	RAB6A	ENSG00000175582.19	0.92	USP46	ENSG00000109189.12	0.74	TIMM23B	ENSG00000204152.10	0.91
FECH	ENSG00000066926.10	0.80	PAXBP1-AS1	ENSG00000238197.5	0.81	ZNF397	ENSG00000186812.12	0.82	ZNF24	ENSG00000172466.15	0.75	HMG20A	ENSG00000140382.14	0.76	MBD1	ENSG00000141644.17	0.75	TSTD2	ENSG00000136925.14	0.75	RPRD1B	ENSG00000101413.11	0.79	CHMP1B	ENSG00000255112.2	0.74	TWSG1	ENSG00000128791.11	0.80	DDX19A	ENSG00000168872.15	0.79	MAPK1IP1L	ENSG00000168175.14	0.92	TOB2P1	ENSG00000176933.5	0.72	SENP1	ENSG00000079387.13	0.91
SPOPL	ENSG00000144228.8	0.80	R3HDM2	ENSG00000179912.19	0.81	TRAPPC8	ENSG00000153339.13	0.81	ZNF592	ENSG00000166716.9	0.75	RNF138	ENSG00000134758.13	0.76	ANKRD12	ENSG00000101745.15	0.74	RALGAPA1	ENSG00000174373.15	0.75	WAC	ENSG00000095787.21	0.79	TOX4	ENSG00000092203.13	0.73	DCBLD2	ENSG00000057019.15	0.80	TASP1	ENSG00000089123.15	0.79	ZNF134	ENSG00000213762.10	0.92	TAB2	ENSG00000055208.17	0.72	TRAPPC8	ENSG00000153339.13	0.91
KLHL20	ENSG00000076321.10	0.79	BIRC6	ENSG00000115760.13	0.80	ZSCAN30	ENSG00000186814.12	0.81	MBD1	ENSG00000141644.17	0.74	C18orf25	ENSG00000152242.10	0.76	SHPRH	ENSG00000146414.15	0.73	ZNF181	ENSG00000197841.14	0.74	PHF8	ENSG00000172943.18	0.79	KBTBD4	ENSG00000123444.13	0.72	DHFRL1	ENSG00000178700.7	0.79	RAB5C	ENSG00000108774.14	0.78	YTHDC1	ENSG00000083896.12	0.92	HCG15	ENSG00000227214.2	0.71	URI1	ENSG00000105176.17	0.91
KLF3	ENSG00000109787.12	0.79	HNRNPA2B1	ENSG00000122566.20	0.80	ROCK1	ENSG00000067900.6	0.80	SS18	ENSG00000141380.13	0.74	KIAA0232	ENSG00000170871.11	0.75	ZNF318	ENSG00000171467.15	0.73	PRMT9	ENSG00000164169.12	0.74	MBD1	ENSG00000141644.17	0.79	BBS1	ENSG00000174483.19	0.72	DHRS4-AS1	ENSG00000215256.3	0.79	NCAPD3	ENSG00000151503.12	0.78	MBD1	ENSG00000141644.17	0.92	ARMCX1	ENSG00000126947.11	0.71	PPP4R1	ENSG00000154845.15	0.91
NARS	ENSG00000134440.11	0.79	TTC31	ENSG00000115282.19	0.79	ZNF407	ENSG00000215421.9	0.80	FBXO9	ENSG00000112146.16	0.73	GAPVD1	ENSG00000165219.21	0.75	CEP76	ENSG00000101624.10	0.73	SEPT7P2	ENSG00000214765.8	0.73	APOOL	ENSG00000155008.13	0.78	HP1BP3	ENSG00000127483.17	0.72	SPIRE1	ENSG00000134278.14	0.78	CTBP1-AS2	ENSG00000196810.4	0.78	EPG5	ENSG00000152223.12	0.92	B3GALNT1	ENSG00000169255.13	0.70	ZMYND11	ENSG00000015171.18	0.91
SEC24B	ENSG00000138802.11	0.78	TMLHE	ENSG00000185973.10	0.78	SEH1L	ENSG00000085415.15	0.80	WDR33	ENSG00000136709.11	0.73	SP2	ENSG00000167182.12	0.75	TAF1	ENSG00000147133.15	0.72	FAM179B	ENSG00000198718.12	0.73	PACRGL	ENSG00000163138.18	0.78	MBD1	ENSG00000141644.17	0.72	DENND6A	ENSG00000174839.12	0.78	TMEM199	ENSG00000244045.10	0.78	SPTY2D1	ENSG00000179119.14	0.92				PRPF18	ENSG00000165630.13	0.91
FBXL18	ENSG00000155034.18	0.78	TAOK2	ENSG00000149930.17	0.78	JKAMP	ENSG00000050130.17	0.80	ELAC1	ENSG00000141642.8	0.73	ROCK1	ENSG00000067900.6	0.75	TGFBRAP1	ENSG00000135966.12	0.72	FBXL17	ENSG00000145743.15	0.73	RALGAPB	ENSG00000170471.14	0.78	ZBTB14	ENSG00000198081.10	0.72	KCTD18	ENSG00000155729.12	0.77	NEK4	ENSG00000114904.12	0.78	NUMB	ENSG00000133961.19	0.92				MALT1	ENSG00000172175.12	0.91
PLEKHA3	ENSG00000116095.10	0.78	RAB12	ENSG00000206418.3	0.78	VPS4B	ENSG00000119541.9	0.80	LRRC37BP1	ENSG00000250462.8	0.73	SMAD4	ENSG00000141646.13	0.75	SCYL3	ENSG00000000457.13	0.72	LIN52	ENSG00000205659.10	0.72	SMCHD1	ENSG00000101596.14	0.78	C6orf89	ENSG00000198663.16	0.71	PRKD3	ENSG00000115825.9	0.77	ARIH2	ENSG00000177479.19	0.77	TNPO2	ENSG00000105576.15	0.92				FUBP3	ENSG00000107164.15	0.90
ADNP2	ENSG00000101544.8	0.78	VAMP7	ENSG00000124333.14	0.77	AFG3L2	ENSG00000141385.9	0.80	CDKN2AIP	ENSG00000168564.5	0.73	IREB2	ENSG00000136381.12	0.75	ZNF236	ENSG00000130856.15	0.72	RBM23	ENSG00000100461.17	0.72	ANKRD12	ENSG00000101745.15	0.78	RBM23	ENSG00000100461.17	0.71	NRIP1	ENSG00000180530.9	0.77	TGFBRAP1	ENSG00000135966.12	0.77	DIDO1	ENSG00000101191.16	0.92				PARG	ENSG00000227345.8	0.90
UBE3C	ENSG00000009335.17	0.78	ATXN1L	ENSG00000224470.7	0.76	SMAD2	ENSG00000175387.15	0.79	TRIM39	ENSG00000204599.14	0.73	DPP8	ENSG00000074603.18	0.75	ANGEL2	ENSG00000174606.12	0.72	FBXL5	ENSG00000118564.14	0.72	APPBP2	ENSG00000062725.9	0.78	KCTD18	ENSG00000155729.12	0.71	LINC01521	ENSG00000213888.3	0.77	PSME3	ENSG00000131467.10	0.77	ZFR	ENSG00000056097.15	0.92				UBE2Q2	ENSG00000140367.11	0.90
KIAA1468	ENSG00000134444.13	0.78	MSL1	ENSG00000188895.11	0.76	PIAS2	ENSG00000078043.15	0.79	SF1	ENSG00000168066.20	0.73	ZMYND11	ENSG00000015171.18	0.74	CDK12	ENSG00000167258.13	0.72	RAB33B	ENSG00000172007.5	0.72	ZNF770	ENSG00000198146.4	0.77	TMEM127	ENSG00000135956.8	0.71	TM9SF1	ENSG00000100926.14	0.76	C1orf109	ENSG00000116922.14	0.77	C11orf58	ENSG00000110696.9	0.92				ZBTB14	ENSG00000198081.10	0.90
USP14	ENSG00000101557.14	0.78	FBXO11	ENSG00000138081.19	0.76	SETBP1	ENSG00000152217.16	0.79	PRPF4B	ENSG00000112739.16	0.73	RAPGEF2	ENSG00000109756.8	0.74	CCNT2	ENSG00000082258.12	0.72	TNPO2	ENSG00000105576.15	0.72	LDB1	ENSG00000198728.10	0.77	HNRNPUL2-BSCL2	ENSG00000234857.2	0.71	MAN1A2	ENSG00000198162.12	0.76	POM121	ENSG00000196313.11	0.77	ALS2	ENSG00000003393.14	0.91				EIF5	ENSG00000100664.10	0.90
MORF4L1P1	ENSG00000218283.2	0.78	SEPSECS	ENSG00000109618.11	0.76	MIB1	ENSG00000101752.11	0.78	TUBGCP3	ENSG00000126216.12	0.73	PTAR1	ENSG00000188647.12	0.74	CIAO1	ENSG00000144021.2	0.72	ZNF594	ENSG00000180626.9	0.72	RP11-47A8.5	ENSG00000272933.1	0.77	TRIM39	ENSG00000204599.14	0.71	RP11-715J22.4	ENSG00000260874.5	0.76	DNAJC11	ENSG00000007923.15	0.77	AKAP8	ENSG00000105127.8	0.91				UTP14C	ENSG00000253797.2	0.90
MGAT2	ENSG00000168282.5	0.78	SMAD4	ENSG00000141646.13	0.76	TIMM21	ENSG00000075336.11	0.78	AMMECR1L	ENSG00000144233.9	0.73	MBD1	ENSG00000141644.17	0.74	ZNF24	ENSG00000172466.15	0.71	FAM161A	ENSG00000170264.12	0.71	ATXN1L	ENSG00000224470.7	0.77	GLYR1	ENSG00000140632.16	0.71	HGSNAT	ENSG00000165102.14	0.76	PARG	ENSG00000227345.8	0.77	CCNT1	ENSG00000129315.9	0.91				TANK	ENSG00000136560.13	0.90
POM121	ENSG00000196313.11	0.78	TAF9B	ENSG00000187325.4	0.76	ANKRD12	ENSG00000101745.15	0.78	ZBTB14	ENSG00000198081.10	0.72	FUBP3	ENSG00000107164.15	0.74	ZNF532	ENSG00000074657.13	0.71	BBS1	ENSG00000174483.19	0.71	SOS2	ENSG00000100485.11	0.77	TECPR2	ENSG00000196663.15	0.71	SDCBP2-AS1	ENSG00000234684.6	0.76	TMEM185B	ENSG00000226479.3	0.77	ZNF136	ENSG00000196646.11	0.91				ICE1	ENSG00000164151.11	0.90
SP2	ENSG00000167182.12	0.77	CALCOCO2	ENSG00000136436.14	0.75	PIK3C3	ENSG00000078142.11	0.78	RPRD1A	ENSG00000141425.17	0.72	FAM193A	ENSG00000125386.14	0.74	DDX46	ENSG00000145833.15	0.71	GALNT11	ENSG00000178234.12	0.71	CLOCK	ENSG00000134852.14	0.77	PEX19	ENSG00000162735.18	0.71	RP11-288C18.1	ENSG00000279519.1	0.76	TIMM23B	ENSG00000204152.10	0.77	GMFB	ENSG00000197045.12	0.91				NAA30	ENSG00000139977.13	0.90
UBE2G1	ENSG00000132388.12	0.77	PPIP5K2	ENSG00000145725.19	0.75	ZNF236	ENSG00000130856.15	0.78	ZNF782	ENSG00000196597.11	0.72	OIP5-AS1	ENSG00000247556.6	0.73	GTF3C3	ENSG00000119041.10	0.71	KRBA2	ENSG00000184619.3	0.71	KIAA2026	ENSG00000183354.11	0.77	NUDCD3	ENSG00000015676.17	0.70	LRRC37A16P	ENSG00000267023.5	0.76	CCAR2	ENSG00000158941.16	0.77	KANSL3	ENSG00000114982.17	0.91				DDX3X	ENSG00000215301.9	0.90
ARID1A	ENSG00000117713.17	0.77	RSRC2	ENSG00000111011.17	0.75	IMPACT	ENSG00000154059.9	0.78	DHX15	ENSG00000109606.12	0.72	SCAF8	ENSG00000213079.9	0.73	MARCH7	ENSG00000136536.14	0.70	ZNF510	ENSG00000081386.12	0.71	USP14	ENSG00000101557.14	0.77	MARK2	ENSG00000072518.20	0.70	NSUN3	ENSG00000178694.9	0.75	FAM168B	ENSG00000152102.17	0.77	FUBP3	ENSG00000107164.15	0.91				AP4E1	ENSG00000081014.10	0.90
KIDINS220	ENSG00000134313.14	0.77	WHAMMP2	ENSG00000248334.6	0.75	SMARCC2	ENSG00000139613.11	0.78	ZNF397	ENSG00000186812.12	0.72	ARPP19	ENSG00000128989.10	0.73	SMG1	ENSG00000157106.16	0.70	IKZF4	ENSG00000123411.14	0.71	ASH1L	ENSG00000116539.10	0.77	SS18	ENSG00000141380.13	0.70	SUCLG2-AS1	ENSG00000241316.6	0.75	ALS2	ENSG00000003393.14	0.77	TNKS2	ENSG00000107854.5	0.91				FAM175B	ENSG00000165660.7	0.90
PIKFYVE	ENSG00000115020.16	0.77	RP11-297N6.4	ENSG00000255046.1	0.74	SPIN3	ENSG00000204271.10	0.78	HNRNPK	ENSG00000165119.18	0.71	FEM1B	ENSG00000169018.5	0.73	SMARCAD1	ENSG00000163104.17	0.70	VPS26B	ENSG00000151502.10	0.70	EBLN3	ENSG00000281649.1	0.76	C11orf58	ENSG00000110696.9	0.70	ZMYND11	ENSG00000015171.18	0.75	GCN1L1	ENSG00000089154.10	0.76	ICE1	ENSG00000164151.11	0.91				ZNF26	ENSG00000198393.7	0.90
EXOC8	ENSG00000116903.7	0.76	METTL20	ENSG00000139160.13	0.74	DNM1L	ENSG00000087470.17	0.78	C18orf25	ENSG00000152242.10	0.71	ZNF407	ENSG00000215421.9	0.73	WRN	ENSG00000165392.9	0.70	ZC3H12B	ENSG00000102053.12	0.70	VEZF1	ENSG00000136451.8	0.76	TRIM26	ENSG00000234127.8	0.70	SLC2A10	ENSG00000197496.5	0.75	RPRD1B	ENSG00000101413.11	0.76	BOD1L1	ENSG00000038219.12	0.91				RSRC2	ENSG00000111011.17	0.90
DIS3	ENSG00000083520.14	0.76	ZNF689	ENSG00000156853.11	0.74	RP11-326K13.4	ENSG00000263823.1	0.77	TRAPPC8	ENSG00000153339.13	0.71	NAPG	ENSG00000134265.12	0.73	KLHL20	ENSG00000076321.10	0.70	MEGF9	ENSG00000106780.8	0.70	ASB8	ENSG00000177981.10	0.76	TTC3	ENSG00000182670.13	0.70	ARL13B	ENSG00000169379.15	0.75	SBDSP1	ENSG00000225648.5	0.76	ATXN7L3B	ENSG00000253719.3	0.91				NUPL1	ENSG00000139496.15	0.90
GPATCH8	ENSG00000186566.11	0.76	ATP6V1E2	ENSG00000250565.6	0.74	FAM20B	ENSG00000116199.11	0.77	SUV420H1	ENSG00000110066.14	0.71	TADA2B	ENSG00000173011.11	0.73	PHIP	ENSG00000146247.13	0.70	NEK9	ENSG00000119638.12	0.70	SART3	ENSG00000075856.11	0.76	ZNF407	ENSG00000215421.9	0.70	FGD5-AS1	ENSG00000225733.5	0.75	SP2	ENSG00000167182.12	0.76	BBS10	ENSG00000179941.6	0.91				LRRC57	ENSG00000180979.9	0.90
MBTPS2	ENSG00000012174.11	0.76	MPPE1	ENSG00000154889.16	0.74	SMAD4	ENSG00000141646.13	0.77	SNX1	ENSG00000028528.14	0.71	NEK1	ENSG00000137601.15	0.73	MCM9	ENSG00000111877.17	0.70	POM121	ENSG00000196313.11	0.70	ADNP	ENSG00000101126.15	0.76	EPG5	ENSG00000152223.12	0.70	SLC39A9	ENSG00000029364.11	0.75	TOX4	ENSG00000092203.13	0.76	ZBTB34	ENSG00000177125.5	0.91				SUZ12	ENSG00000178691.10	0.89
SDAD1	ENSG00000198301.11	0.76	SGPP1	ENSG00000126821.7	0.74	KIAA1468	ENSG00000134444.13	0.77	ANKRD12	ENSG00000101745.15	0.71	ABHD17B	ENSG00000107362.13	0.73	RIF1	ENSG00000080345.17	0.70	GOLGA1	ENSG00000136935.13	0.70	TMX2P1	ENSG00000213839.4	0.76	SMARCC2	ENSG00000139613.11	0.70	RP11-452L6.5	ENSG00000260267.1	0.75	FBXO3	ENSG00000110429.13	0.76	ZKSCAN3	ENSG00000189298.13	0.91				PAIP1	ENSG00000172239.13	0.89
HERPUD2	ENSG00000122557.9	0.76	PURA	ENSG00000185129.5	0.74	BRI3BP	ENSG00000184992.10	0.77	ZNF280D	ENSG00000137871.19	0.71	IGF1R	ENSG00000140443.13	0.73	ERCC3	ENSG00000163161.12	0.70	RALGAPA1P	ENSG00000229419.1	0.70	UBE3B	ENSG00000151148.13	0.75				RP11-734K2.4	ENSG00000270344.2	0.75	SEC24C	ENSG00000176986.14	0.76	MGA	ENSG00000174197.16	0.91				CUL2	ENSG00000108094.14	0.89
TMEM248	ENSG00000106609.16	0.76	KAT7	ENSG00000136504.11	0.74	MIEF1	ENSG00000100335.12	0.77	ZSCAN29	ENSG00000140265.12	0.71	ZNF24	ENSG00000172466.15	0.73	TUG1	ENSG00000253352.8	0.70	THAP6	ENSG00000174796.12	0.70	DCAF10	ENSG00000122741.15	0.75				TUG1	ENSG00000253352.8	0.75	UBE2D3	ENSG00000109332.19	0.76	TMEM248	ENSG00000106609.16	0.91				ZNF562	ENSG00000171466.9	0.89
TOX4	ENSG00000092203.13	0.76	L3MBTL4	ENSG00000154655.14	0.74	NUPL2	ENSG00000136243.16	0.77	YTHDC1	ENSG00000083896.12	0.71	KLHL9	ENSG00000198642.6	0.73				KLHDC1	ENSG00000197776.7	0.70	ZNF791	ENSG00000173875.13	0.75				SUOX	ENSG00000139531.12	0.75	GLYR1	ENSG00000140632.16	0.76	RANBP2	ENSG00000153201.15	0.91				SLC33A1	ENSG00000169359.13	0.89
ANKRD17	ENSG00000132466.17	0.76	MTMR10	ENSG00000166912.16	0.74	EIF4ENIF1	ENSG00000184708.17	0.77	C17orf80	ENSG00000141219.15	0.71	EPS15	ENSG00000085832.16	0.73							GBF1	ENSG00000107862.4	0.75				RP11-797A18.5	ENSG00000278991.1	0.75	TAF2	ENSG00000064313.11	0.76	TBCEL	ENSG00000154114.12	0.91				SCYL2	ENSG00000136021.17	0.89
HMG20A	ENSG00000140382.14	0.76	RP3-400B16.1	ENSG00000234817.2	0.74	OSBPL1A	ENSG00000141447.16	0.76	IKBKAP	ENSG00000070061.14	0.71	HP1BP3	ENSG00000127483.17	0.73							ARFGEF2	ENSG00000124198.8	0.75				PTPN21	ENSG00000070778.12	0.75	WDR45B	ENSG00000141580.15	0.76	DNAJC14	ENSG00000135392.15	0.91				INO80	ENSG00000128908.15	0.89
UEVLD	ENSG00000151116.16	0.76	CTC-241N9.1	ENSG00000245317.2	0.74	TMX3	ENSG00000166479.9	0.76	ZNF181	ENSG00000197841.14	0.71	ANKRD12	ENSG00000101745.15	0.73							SENP1	ENSG00000079387.13	0.75				RAB11FIP3	ENSG00000090565.15	0.74	NSUN4	ENSG00000117481.10	0.76	ZNF2	ENSG00000275111.4	0.91				USP46	ENSG00000109189.12	0.89
FBXW2	ENSG00000119402.16	0.76	LTN1	ENSG00000198862.13	0.74	DNAJC14	ENSG00000135392.15	0.76	TUG1	ENSG00000253352.8	0.71	TRAPPC11	ENSG00000168538.15	0.73							ICE1	ENSG00000164151.11	0.75				CAPN7	ENSG00000131375.9	0.74	PACRGL	ENSG00000163138.18	0.76	CCNY	ENSG00000108100.17	0.91				RAB21	ENSG00000080371.5	0.89
SRP72	ENSG00000174780.15	0.75	ANKRD17	ENSG00000132466.17	0.73	RP4-769N13.6	ENSG00000271147.7	0.76	TIMM21	ENSG00000075336.11	0.71	UBE2D3	ENSG00000109332.19	0.73							BRD3	ENSG00000169925.16	0.75				CRTC3	ENSG00000140577.15	0.74	TFAM	ENSG00000108064.10	0.76	ZNF549	ENSG00000121406.8	0.91				SEC62	ENSG00000008952.16	0.89
CTDSP2	ENSG00000175215.9	0.75	DDX3X	ENSG00000215301.9	0.73	ACTR6	ENSG00000075089.9	0.76	PPP6R3	ENSG00000110075.14	0.71	SDAD1	ENSG00000198301.11	0.73							PDPK1	ENSG00000140992.18	0.75				LRRC37A17P	ENSG00000263142.5	0.74	WDR37	ENSG00000047056.14	0.76	GANAB	ENSG00000089597.16	0.91				NCKAP1	ENSG00000061676.14	0.89
ADAM10	ENSG00000137845.14	0.75	VPS4B	ENSG00000119541.9	0.73	PKN2	ENSG00000065243.18	0.76	KLHL9	ENSG00000198642.6	0.71	SEC24B	ENSG00000138802.11	0.73							ERCC6L2	ENSG00000182150.15	0.75				FBXL17	ENSG00000145743.15	0.74	AZI2	ENSG00000163512.13	0.76	ATE1	ENSG00000107669.17	0.91				ZNF41	ENSG00000147124.12	0.89
TRIM44	ENSG00000166326.6	0.75	KCTD21-AS1	ENSG00000246174.7	0.73	PURB	ENSG00000146676.6	0.76	VWA9	ENSG00000138614.14	0.70	ZNF592	ENSG00000166716.9	0.73							WNK1	ENSG00000060237.16	0.75				SEL1L	ENSG00000071537.13	0.74	GRWD1	ENSG00000105447.12	0.76	DPP8	ENSG00000074603.18	0.91				DDX52	ENSG00000278053.4	0.89
TGFBRAP1	ENSG00000135966.12	0.75	GANC	ENSG00000214013.9	0.73	RREB1	ENSG00000124782.19	0.76	DDX20	ENSG00000064703.11	0.70	CTDSPL2	ENSG00000137770.13	0.73							ZBTB14	ENSG00000198081.10	0.75				MAP4K5	ENSG00000012983.11	0.74	ZNF496	ENSG00000162714.12	0.76	TFCP2	ENSG00000135457.9	0.91				SDAD1	ENSG00000198301.11	0.89
BIRC6	ENSG00000115760.13	0.75	MADD	ENSG00000110514.18	0.73	ADCY6	ENSG00000174233.11	0.76	TRA2B	ENSG00000136527.17	0.70	FBXW2	ENSG00000119402.16	0.72							UTP14C	ENSG00000253797.2	0.75				SPOPL	ENSG00000144228.8	0.74	RGP1	ENSG00000107185.9	0.76	PRR12	ENSG00000126464.13	0.91				PIP5K1A	ENSG00000143398.19	0.89
SLC30A6	ENSG00000152683.14	0.75	POLA1	ENSG00000101868.10	0.73	C18orf25	ENSG00000152242.10	0.76	MLLT10	ENSG00000078403.16	0.70	SLAIN2	ENSG00000109171.14	0.72							ZNF41	ENSG00000147124.12	0.75				CARF	ENSG00000138380.17	0.74	ZDHHC7	ENSG00000153786.12	0.76	WAC	ENSG00000095787.21	0.90				FAM204A	ENSG00000165669.13	0.89
FAM220A	ENSG00000178397.12	0.75	AC105402.2	ENSG00000228848.3	0.73	DCAF5	ENSG00000139990.17	0.75	VPS36	ENSG00000136100.12	0.70	CTBP1-AS2	ENSG00000196810.4	0.72							STX18-AS1	ENSG00000247708.7	0.75				PER2	ENSG00000132326.11	0.74	FBXL14	ENSG00000171823.6	0.75	AKAP10	ENSG00000108599.14	0.90				WDR11	ENSG00000120008.15	0.89
CAB39	ENSG00000135932.10	0.75	MED13	ENSG00000108510.9	0.73	ZNF532	ENSG00000074657.13	0.75	CBWD2	ENSG00000136682.14	0.70	ICE2	ENSG00000128915.11	0.72							ZNF778	ENSG00000170100.13	0.75				SGMS1-AS1	ENSG00000226200.6	0.74	VPRBP	ENSG00000145041.15	0.75	UBR2	ENSG00000024048.10	0.90				PPP1R2	ENSG00000184203.7	0.89
AFG3L2	ENSG00000141385.9	0.75	FBXW11P1	ENSG00000230870.2	0.73	VAPA	ENSG00000101558.13	0.75	ZNF236	ENSG00000130856.15	0.70	CELF1	ENSG00000149187.17	0.72							AP3M1	ENSG00000185009.12	0.75				CTDSP1	ENSG00000144579.7	0.74	C11orf58	ENSG00000110696.9	0.75	ZNF384	ENSG00000126746.17	0.90				RANBP2	ENSG00000153201.15	0.89
PARG	ENSG00000227345.8	0.75	HP1BP3	ENSG00000127483.17	0.73	SLTM	ENSG00000137776.16	0.75	BBS1	ENSG00000174483.19	0.70	RNF38	ENSG00000137075.17	0.72							FUBP3	ENSG00000107164.15	0.75				KIDINS220	ENSG00000134313.14	0.74	ZNF655	ENSG00000197343.10	0.75	CHD2	ENSG00000173575.18	0.90				TNKS2	ENSG00000107854.5	0.89
ORC4	ENSG00000115947.13	0.75	TERF2	ENSG00000132604.10	0.73	HNRNPUL2-BSCL2	ENSG00000234857.2	0.75	FUBP3	ENSG00000107164.15	0.70	NAF1	ENSG00000145414.8	0.72							FCF1	ENSG00000119616.11	0.75				UGDH-AS1	ENSG00000249348.1	0.74	RAVER1	ENSG00000161847.13	0.75	MAML1	ENSG00000161021.11	0.90				HTATSF1	ENSG00000102241.11	0.89
ATF1	ENSG00000123268.8	0.75	THAP6	ENSG00000174796.12	0.73	USP14	ENSG00000101557.14	0.75	LINC00526	ENSG00000264575.1	0.70	USP8	ENSG00000138592.13	0.72							RAVER1	ENSG00000161847.13	0.75				CHMP1B	ENSG00000255112.2	0.73	ZNF263	ENSG00000006194.9	0.75	UTP14C	ENSG00000253797.2	0.90				DDX5	ENSG00000108654.11	0.89
USP42	ENSG00000106346.11	0.75	EPG5	ENSG00000152223.12	0.73	AASDH	ENSG00000157426.13	0.75	FAM219B	ENSG00000178761.14	0.70	ASB7	ENSG00000183475.12	0.72							ZNF510	ENSG00000081386.12	0.75				HERPUD2	ENSG00000122557.9	0.73	UBA5	ENSG00000081307.12	0.75	SENP6	ENSG00000112701.17	0.90				VPS4B	ENSG00000119541.9	0.89
LANCL1	ENSG00000115365.11	0.75	CLPX	ENSG00000166855.9	0.73	RPAP3	ENSG00000005175.9	0.75	ZNF764	ENSG00000169951.9	0.70	SLK	ENSG00000065613.13	0.72							CHD6	ENSG00000124177.14	0.75				BLOC1S6	ENSG00000104164.10	0.73	KBTBD4	ENSG00000123444.13	0.75	ZMYM1	ENSG00000197056.9	0.90				RSPRY1	ENSG00000159579.13	0.89
RAB5C	ENSG00000108774.14	0.75	CYB561D1	ENSG00000174151.14	0.73	MFSD8	ENSG00000164073.9	0.75	ZNF585B	ENSG00000245680.9	0.70	PDS5A	ENSG00000121892.14	0.72							DENND4C	ENSG00000137145.20	0.75				EIF3J-AS1	ENSG00000179523.4	0.73	LARP4B	ENSG00000107929.14	0.75	ZNF585B	ENSG00000245680.9	0.90				FAM188A	ENSG00000148481.13	0.89
SEC23A	ENSG00000100934.14	0.75	MIA2	ENSG00000150526.11	0.73	COPS4	ENSG00000138663.8	0.75	UTP14C	ENSG00000253797.2	0.70	STAG1	ENSG00000118007.12	0.72							RAB11FIP2	ENSG00000107560.10	0.75				ARPIN	ENSG00000242498.7	0.73	SPOP	ENSG00000121067.17	0.75	PDCL	ENSG00000136940.13	0.90				SECISBP2L	ENSG00000138593.8	0.89
G3BP2	ENSG00000138757.14	0.75	ANKRD12	ENSG00000101745.15	0.73	CREBBP	ENSG00000005339.12	0.75	HP1BP3	ENSG00000127483.17	0.70	KBTBD4	ENSG00000123444.13	0.72							TRIP11	ENSG00000100815.12	0.75				ROCK2	ENSG00000134318.13	0.73	MLH1	ENSG00000076242.14	0.75	ZMYM4	ENSG00000146463.11	0.90				GXYLT1	ENSG00000151233.10	0.89
TMEM131	ENSG00000075568.16	0.75	HNF1A-AS1	ENSG00000241388.4	0.73	RP11-390E23.6	ENSG00000272686.1	0.75	ZNF45	ENSG00000124459.11	0.70	YES1	ENSG00000176105.13	0.72							ZXDA	ENSG00000198205.6	0.74				PON2	ENSG00000105854.12	0.73	ZNF384	ENSG00000126746.17	0.75	LSM14A	ENSG00000257103.8	0.90				ERLEC1	ENSG00000068912.13	0.89
ERCC6L2	ENSG00000182150.15	0.74	ELMOD3	ENSG00000115459.17	0.73	ZNF271P	ENSG00000257267.2	0.75	SMAD4	ENSG00000141646.13	0.70	KIAA1109	ENSG00000138688.15	0.72							NAA30	ENSG00000139977.13	0.74				SOS1	ENSG00000115904.12	0.73	PDE12	ENSG00000174840.8	0.75	SMG1	ENSG00000157106.16	0.90				MIB1	ENSG00000101752.11	0.89
CCNI	ENSG00000118816.9	0.74	MBD1	ENSG00000141644.17	0.72	BRMS1L	ENSG00000100916.13	0.75	SRSF3	ENSG00000112081.16	0.70	SHPRH	ENSG00000146414.15	0.72							RP4-769N13.6	ENSG00000271147.7	0.74				RP11-298I3.4	ENSG00000258457.5	0.73	KLHL36	ENSG00000135686.12	0.75	ZNF17	ENSG00000186272.12	0.90				UBA5	ENSG00000081307.12	0.89
DDX46	ENSG00000145833.15	0.74	ZNF271P	ENSG00000257267.2	0.72	PHF6	ENSG00000156531.16	0.75	FUBP1	ENSG00000162613.16	0.70	FAM122A	ENSG00000187866.7	0.72							ZNF384	ENSG00000126746.17	0.74				RXRA	ENSG00000186350.9	0.73	WAC	ENSG00000095787.21	0.75	ATAD1	ENSG00000138138.13	0.90				ZNF180	ENSG00000167384.10	0.89
ZNF592	ENSG00000166716.9	0.74	C4orf36	ENSG00000163633.10	0.72	PIGY	ENSG00000255072.1	0.75	LINC00909	ENSG00000264247.1	0.70	LATS1	ENSG00000131023.12	0.72							MRPS31P4	ENSG00000250299.5	0.74				RP11-815J4.6	ENSG00000256616.3	0.73	PIGS	ENSG00000087111.20	0.75	DOPEY1	ENSG00000083097.14	0.90				ZFAND6	ENSG00000086666.18	0.89
ZBTB6	ENSG00000186130.4	0.74	RP11-23N2.4	ENSG00000260618.1	0.72	GPKOW	ENSG00000068394.10	0.75	CHD9	ENSG00000177200.15	0.70	RANBP6	ENSG00000137040.9	0.72							KMT2D	ENSG00000167548.14	0.74				ZKSCAN1	ENSG00000106261.16	0.73	POFUT1	ENSG00000101346.11	0.75	ZNF271P	ENSG00000257267.2	0.90				RLIM	ENSG00000131263.12	0.89
PSME3	ENSG00000131467.10	0.74	SYNJ1	ENSG00000159082.17	0.72	NEMF	ENSG00000165525.17	0.74				CASC4	ENSG00000166734.18	0.72							BAZ2A	ENSG00000076108.11	0.74				WDR35	ENSG00000118965.14	0.73	RNF4	ENSG00000063978.15	0.75	ZNF543	ENSG00000178229.7	0.90				SPATA5	ENSG00000145375.7	0.89
RABGEF1	ENSG00000154710.15	0.74	ARPP19	ENSG00000128989.10	0.72	RP11-56G10.2	ENSG00000257386.1	0.74				ZSCAN29	ENSG00000140265.12	0.72							SIN3A	ENSG00000169375.15	0.74				FAM208A	ENSG00000163946.13	0.73	DPP8	ENSG00000074603.18	0.75	ANKRD40	ENSG00000154945.6	0.90				FAM208A	ENSG00000163946.13	0.89
WDR7	ENSG00000091157.13	0.74	SLC30A4	ENSG00000104154.6	0.72	ADAR	ENSG00000160710.15	0.74				MEF2A	ENSG00000068305.17	0.72							CCDC142	ENSG00000135637.13	0.74				NF1	ENSG00000196712.16	0.73	DHX33	ENSG00000005100.12	0.75	SPTLC1	ENSG00000090054.13	0.90				ZFR	ENSG00000056097.15	0.89
GTF2I	ENSG00000263001.5	0.74	NF1	ENSG00000196712.16	0.72	LINC00909	ENSG00000264247.1	0.74				MTMR9	ENSG00000104643.9	0.72							HMG20A	ENSG00000140382.14	0.74				AC000123.2	ENSG00000280347.1	0.73	TM9SF1	ENSG00000100926.14	0.75	WDR47	ENSG00000085433.15	0.90				DNM1L	ENSG00000087470.17	0.89
ZFP91	ENSG00000186660.14	0.74	FCHO2	ENSG00000157107.13	0.72	SS18	ENSG00000141380.13	0.74				INIP	ENSG00000148153.13	0.72							ZNF772	ENSG00000197128.11	0.74				SBF2	ENSG00000133812.14	0.73	PSMF1	ENSG00000125818.17	0.75	ZMYM3	ENSG00000147130.14	0.90				CASC4	ENSG00000166734.18	0.89
USP9X	ENSG00000124486.12	0.74	ROCK1	ENSG00000067900.6	0.72	METTL4	ENSG00000101574.14	0.74				UBE3A	ENSG00000114062.17	0.72							CUL2	ENSG00000108094.14	0.74				SH3YL1	ENSG00000035115.21	0.72	SART3	ENSG00000075856.11	0.75	C16orf72	ENSG00000182831.11	0.90				RAB11FIP2	ENSG00000107560.10	0.89
RNF111	ENSG00000157450.15	0.74	STAG2	ENSG00000101972.18	0.72	TAPT1	ENSG00000169762.16	0.74				PPP6R3	ENSG00000110075.14	0.72							RALGAPA1P	ENSG00000229419.1	0.74				ERCC6L2	ENSG00000182150.15	0.72	RPL7L1	ENSG00000146223.14	0.75	SPEN	ENSG00000065526.10	0.90				TRA2B	ENSG00000136527.17	0.89
ERLEC1	ENSG00000068912.13	0.74	SECISBP2L	ENSG00000138593.8	0.72	GPRASP2	ENSG00000158301.18	0.74				OSBPL1A	ENSG00000141447.16	0.72							GAPVD1	ENSG00000165219.21	0.74				ZADH2	ENSG00000180011.6	0.72	HP1BP3	ENSG00000127483.17	0.75	SRRM1	ENSG00000133226.16	0.90				PIKFYVE	ENSG00000115020.16	0.89
MORF4L1	ENSG00000185787.14	0.74	BAHD1	ENSG00000140320.11	0.72	KIAA0430	ENSG00000166783.19	0.74				ZBTB6	ENSG00000186130.4	0.72							CRAMP1L	ENSG00000007545.15	0.74				RP11-600F24.7	ENSG00000260285.1	0.72	WDR11	ENSG00000120008.15	0.74	KIAA0355	ENSG00000166398.12	0.90				RNF111	ENSG00000157450.15	0.89
CLOCK	ENSG00000134852.14	0.74	AP1G1	ENSG00000166747.12	0.72	ZNF585B	ENSG00000245680.9	0.74				NCOA2	ENSG00000140396.12	0.72							METAP2	ENSG00000111142.13	0.74				ARHGAP35	ENSG00000160007.17	0.72	EXOC2	ENSG00000112685.13	0.74	BLOC1S6	ENSG00000104164.10	0.90				DIS3	ENSG00000083520.14	0.89
YTHDC1	ENSG00000083896.12	0.74	DIS3L	ENSG00000166938.12	0.71	RPRD1A	ENSG00000141425.17	0.74				LRRC57	ENSG00000180979.9	0.72							NAPEPLD	ENSG00000161048.11	0.74				BAZ2B	ENSG00000123636.17	0.72	RNF111	ENSG00000157450.15	0.74	RNF111	ENSG00000157450.15	0.90				STX17	ENSG00000136874.10	0.89
FUBP3	ENSG00000107164.15	0.74	CCDC93	ENSG00000125633.10	0.71	FAM193A	ENSG00000125386.14	0.74				SECISBP2L	ENSG00000138593.8	0.72							DPP8	ENSG00000074603.18	0.74				SENP7	ENSG00000138468.15	0.72	BRMS1L	ENSG00000100916.13	0.74	ZNF879	ENSG00000234284.6	0.90				NUP54	ENSG00000138750.14	0.88
TOR1AIP1	ENSG00000143337.18	0.74	CDNF	ENSG00000185267.9	0.71	MBTPS2	ENSG00000012174.11	0.74				DIS3L	ENSG00000166938.12	0.72							C5orf42	ENSG00000197603.13	0.74				ZSCAN12	ENSG00000158691.14	0.72	AARS2	ENSG00000124608.4	0.74	PNPLA8	ENSG00000135241.16	0.90				ZNF45	ENSG00000124459.11	0.88
SLAIN2	ENSG00000109171.14	0.74	ZBTB39	ENSG00000166860.2	0.71	ZNF24	ENSG00000172466.15	0.74				SPIN1	ENSG00000106723.16	0.72							GTF2I	ENSG00000263001.5	0.74				FSCN2	ENSG00000186765.11	0.72	IREB2	ENSG00000136381.12	0.74	MAU2	ENSG00000129933.20	0.90				MATR3	ENSG00000015479.17	0.88
CNOT6L	ENSG00000138767.12	0.73	VBP1	ENSG00000155959.10	0.71	KLHL15	ENSG00000174010.9	0.74				METTL14	ENSG00000145388.14	0.71							RBM23	ENSG00000100461.17	0.74				FKBP9	ENSG00000122642.10	0.72	RBM23	ENSG00000100461.17	0.74	TFAM	ENSG00000108064.10	0.90				KLHL20	ENSG00000076321.10	0.88
BAZ1B	ENSG00000009954.10	0.73	RAP2C	ENSG00000123728.9	0.71	HTATSF1	ENSG00000102241.11	0.74				KIAA1958	ENSG00000165185.14	0.71							XPO4	ENSG00000132953.16	0.74				EVC	ENSG00000072840.12	0.72	DNAAF5	ENSG00000164818.15	0.74	GORASP2	ENSG00000115806.12	0.90				DCLRE1A	ENSG00000198924.7	0.88
RBM12	ENSG00000244462.7	0.73	HEXA-AS1	ENSG00000260339.1	0.71	NAPG	ENSG00000134265.12	0.74				KIAA1468	ENSG00000134444.13	0.71							FAM179B	ENSG00000198718.12	0.74				RBMS1	ENSG00000153250.17	0.72	UTP14C	ENSG00000253797.2	0.74	THAP5	ENSG00000177683.13	0.90				BLOC1S6	ENSG00000104164.10	0.88
SLC25A13	ENSG00000004864.13	0.73	PDPK1	ENSG00000140992.18	0.71	TSFM	ENSG00000123297.16	0.74				HELQ	ENSG00000163312.10	0.71							PARG	ENSG00000227345.8	0.74				KLHL28	ENSG00000179454.13	0.72	DNAJC14	ENSG00000135392.15	0.74	ZSCAN30	ENSG00000186814.12	0.90				ALKBH8	ENSG00000137760.14	0.88
LRRC57	ENSG00000180979.9	0.73	STAT6	ENSG00000166888.10	0.71	SMCHD1	ENSG00000101596.14	0.74				USP38	ENSG00000170185.9	0.71							SECISBP2L	ENSG00000138593.8	0.74				AJUBA	ENSG00000129474.15	0.72	COMMD2	ENSG00000114744.8	0.74	MIER3	ENSG00000155545.19	0.90				DENND5B	ENSG00000170456.14	0.88
SNX30	ENSG00000148158.16	0.73	CTC-236F12.4	ENSG00000248727.5	0.71	ANKRD17	ENSG00000132466.17	0.74				ZNF639	ENSG00000121864.9	0.71							WDFY3	ENSG00000163625.15	0.74				RNF144A	ENSG00000151692.14	0.72	TIMM10B	ENSG00000132286.11	0.74	KMT2D	ENSG00000167548.14	0.90				ZSCAN29	ENSG00000140265.12	0.88
EPC2	ENSG00000135999.11	0.73	SNX1	ENSG00000028528.14	0.71	ZKSCAN1	ENSG00000106261.16	0.74				VPS4B	ENSG00000119541.9	0.71							SEC24C	ENSG00000176986.14	0.74				RP5-1139B12.3	ENSG00000269934.1	0.72	GOSR2	ENSG00000108433.15	0.74	VPS4B	ENSG00000119541.9	0.90				SACM1L	ENSG00000211456.10	0.88
EXOC5	ENSG00000070367.15	0.73	RP11-676M6.1	ENSG00000254612.2	0.71	KDSR	ENSG00000119537.15	0.74				RAB14	ENSG00000119396.10	0.71							LARP4B	ENSG00000107929.14	0.74				ZBED6	ENSG00000257315.1	0.72	DCAF5	ENSG00000139990.17	0.74	GANC	ENSG00000214013.9	0.90				SRSF3	ENSG00000112081.16	0.88
PUM2	ENSG00000055917.15	0.73	FTO	ENSG00000140718.18	0.71	ZDHHC17	ENSG00000186908.14	0.74				RFC1	ENSG00000035928.14	0.71							TADA2B	ENSG00000173011.11	0.74				DYRK2	ENSG00000127334.10	0.72	ZFP64	ENSG00000020256.19	0.74	NEK9	ENSG00000119638.12	0.90				CTBP2	ENSG00000175029.16	0.88
AP3M1	ENSG00000185009.12	0.73	FAM182B	ENSG00000175170.14	0.71	RNF138	ENSG00000134758.13	0.74				MIB1	ENSG00000101752.11	0.71							INIP	ENSG00000148153.13	0.74				RP11-649A18.12	ENSG00000263843.1	0.72	DHX35	ENSG00000101452.14	0.74	BIRC6	ENSG00000115760.13	0.90				TADA1	ENSG00000152382.5	0.88
STAM2	ENSG00000115145.9	0.73	RBL2	ENSG00000103479.14	0.71	CSTF2	ENSG00000101811.13	0.74				ARID1B	ENSG00000049618.21	0.71							FBXW2	ENSG00000119402.16	0.74				MIB1	ENSG00000101752.11	0.72	HSPA14	ENSG00000187522.13	0.74	YLPM1	ENSG00000119596.17	0.90				ARL5A	ENSG00000162980.16	0.88
ZFYVE26	ENSG00000072121.15	0.73	HEATR5B	ENSG00000008869.11	0.71	USP38	ENSG00000170185.9	0.74				AP1AR	ENSG00000138660.11	0.71							KAT6B	ENSG00000156650.12	0.73				FAM179B	ENSG00000198718.12	0.72	KHSRP	ENSG00000088247.15	0.74	REV1	ENSG00000135945.9	0.90				LSM14A	ENSG00000257103.8	0.88
RNF216	ENSG00000011275.18	0.73	BACE1	ENSG00000186318.16	0.71	ZSCAN29	ENSG00000140265.12	0.74				RTF1	ENSG00000137815.14	0.71							YTHDC1	ENSG00000083896.12	0.73				CTDSP2	ENSG00000175215.9	0.71	GANAB	ENSG00000089597.16	0.74	AKT2	ENSG00000105221.16	0.90				RNF6	ENSG00000127870.16	0.88
FKTN	ENSG00000106692.13	0.73	RNF138	ENSG00000134758.13	0.71	TOX4	ENSG00000092203.13	0.74				NAA30	ENSG00000139977.13	0.71							TAB3	ENSG00000157625.15	0.73				ATF7	ENSG00000170653.18	0.71	DDX46	ENSG00000145833.15	0.74	CWC22	ENSG00000163510.13	0.90				LINC00662	ENSG00000261824.6	0.88
NSRP1	ENSG00000126653.15	0.73	TNRC6A	ENSG00000090905.17	0.71	SPIRE1	ENSG00000134278.14	0.74				THAP6	ENSG00000174796.12	0.71							ZNF134	ENSG00000213762.10	0.73				ERV3-1	ENSG00000213462.4	0.71	ZNF500	ENSG00000103199.13	0.74	PURB	ENSG00000146676.6	0.90				ERCC4	ENSG00000175595.14	0.88
MPP5	ENSG00000072415.8	0.73	UBE3B	ENSG00000151148.13	0.71	UBA2	ENSG00000126261.12	0.74				WAC	ENSG00000095787.21	0.71							AFG3L2	ENSG00000141385.9	0.73				SLC25A21-AS1	ENSG00000258708.1	0.71	MARK2	ENSG00000072518.20	0.74	UBR1	ENSG00000159459.11	0.90				DPP8	ENSG00000074603.18	0.88
RALGAPA1P	ENSG00000229419.1	0.73	FBXL12	ENSG00000127452.8	0.71	UBE2A	ENSG00000077721.15	0.74				NSD1	ENSG00000165671.18	0.71							BMI1	ENSG00000168283.13	0.73				GDAP1	ENSG00000104381.12	0.71	DDHD2	ENSG00000085788.13	0.74	FAM168B	ENSG00000152102.17	0.90				ZNF558	ENSG00000167785.8	0.88
HIAT1	ENSG00000156875.13	0.73	CARF	ENSG00000138380.17	0.70	PRMT5	ENSG00000100462.15	0.74				GIGYF2	ENSG00000204120.14	0.71							CREBBP	ENSG00000005339.12	0.73				RUFY2	ENSG00000204130.12	0.71	RPTOR	ENSG00000141564.13	0.74	R3HDM2	ENSG00000179912.19	0.90				ZNF407	ENSG00000215421.9	0.88
POLR2B	ENSG00000047315.14	0.73	HERC3	ENSG00000138641.15	0.70	TTC8	ENSG00000165533.18	0.74				EIF3J-AS1	ENSG00000179523.4	0.71							ZNF33A	ENSG00000189180.15	0.73				MEF2A	ENSG00000068305.17	0.71	CDK12	ENSG00000167258.13	0.74	TRIM39	ENSG00000204599.14	0.90				KLHL2	ENSG00000109466.13	0.88
MAP3K2	ENSG00000169967.16	0.73	MEMO1P1	ENSG00000226054.2	0.70	GTF2A1	ENSG00000165417.11	0.74				GANC	ENSG00000214013.9	0.71							SMC3	ENSG00000108055.9	0.73				RP5-894A10.6	ENSG00000270157.1	0.71	BBS1	ENSG00000174483.19	0.74	RALGAPB	ENSG00000170471.14	0.90				DUT	ENSG00000128951.13	0.88
TRAF3IP1	ENSG00000204104.11	0.73	FLCN	ENSG00000154803.12	0.70	TM9SF1	ENSG00000100926.14	0.74				CDKN2AIP	ENSG00000168564.5	0.71							MTERF4	ENSG00000122085.16	0.73				CCDC186	ENSG00000165813.16	0.71	GTF2I	ENSG00000263001.5	0.74	PTPRA	ENSG00000132670.20	0.90				ACAP2	ENSG00000114331.12	0.88
RAD17	ENSG00000152942.18	0.73	SLC13A4	ENSG00000164707.15	0.70	FEM1B	ENSG00000169018.5	0.73				MAP3K2	ENSG00000169967.16	0.71							ANKRD17	ENSG00000132466.17	0.73				ZNF862	ENSG00000106479.10	0.71	ANKRD40	ENSG00000154945.6	0.74	UPF2	ENSG00000151461.19	0.89				UEVLD	ENSG00000151116.16	0.88
DPP8	ENSG00000074603.18	0.72	SOCS5	ENSG00000171150.7	0.70	PSMC6	ENSG00000100519.11	0.73				BRD3	ENSG00000169925.16	0.71							GTF3C4	ENSG00000125484.11	0.73				MAPK14	ENSG00000112062.10	0.71	MON1B	ENSG00000103111.14	0.74	BBS4	ENSG00000140463.13	0.89				SMG1	ENSG00000157106.16	0.88
PRRC2C	ENSG00000117523.15	0.72	NUDT12	ENSG00000112874.9	0.70	TECPR2	ENSG00000196663.15	0.73				GTF3C4	ENSG00000125484.11	0.71							ZNF263	ENSG00000006194.9	0.73				AKT1	ENSG00000142208.15	0.71	ZADH2	ENSG00000180011.6	0.74	POM121	ENSG00000196313.11	0.89				ZNF17	ENSG00000186272.12	0.88
IARS2	ENSG00000067704.9	0.72	BAZ2A	ENSG00000076108.11	0.70	YIPF6	ENSG00000181704.11	0.73				POLR2B	ENSG00000047315.14	0.71							RASA1	ENSG00000145715.14	0.73				ZBTB14	ENSG00000198081.10	0.71	MAN2A2	ENSG00000196547.14	0.74	ITCH	ENSG00000078747.12	0.89				YTHDC1	ENSG00000083896.12	0.88
CDC23	ENSG00000094880.10	0.72	SPOP	ENSG00000121067.17	0.70	AFF1	ENSG00000172493.20	0.73				POLR2M	ENSG00000255529.7	0.71							TRAPPC8	ENSG00000153339.13	0.73				ABL1	ENSG00000097007.17	0.71	RP11-343C2.11	ENSG00000260914.3	0.74	NPC1	ENSG00000141458.12	0.89				PDE12	ENSG00000174840.8	0.88
ZC3H10	ENSG00000135482.6	0.72	SGMS1-AS1	ENSG00000226200.6	0.70	ZBTB14	ENSG00000198081.10	0.73				ZFP91	ENSG00000186660.14	0.71							ZNF248	ENSG00000198105.11	0.73				GUSBP2	ENSG00000241549.8	0.71	UMAD1	ENSG00000219545.9	0.74	SLK	ENSG00000065613.13	0.89				CHD2	ENSG00000173575.18	0.88
SUPT6H	ENSG00000109111.14	0.72	RSPRY1	ENSG00000159579.13	0.70	ZNF699	ENSG00000196110.7	0.73				UBXN2B	ENSG00000215114.7	0.71							CSNK2A1	ENSG00000101266.16	0.73				CROT	ENSG00000005469.11	0.71	ABCF1	ENSG00000204574.12	0.74	MLLT10	ENSG00000078403.16	0.89				NHLRC2	ENSG00000196865.4	0.88

## Sheet: LINC00668
ACC Tumor			BLCA Tumor			CESC Tumor			CHOL Tumor			KICH Tumor			KIRC Tumor			KIRP Tumor			MESO Tumor			PAAD Tumor			PCPG Tumor			THCA Tumor			THYM Tumor			UCEC Tumor			UVM Tumor
Metazoa_SRP	ENSG00000281061.1	1.00	RNU2-10P	ENSG00000252184.1	0.86	RP11-349K16.1	ENSG00000256643.1	0.90	HOXC-AS3	ENSG00000251151.2	0.95	SCML2P1	ENSG00000264127.1	1.00	TRMT112P4	ENSG00000236763.2	0.89	SCML2P1	ENSG00000264127.1	0.84	RP11-93M12.1	ENSG00000250624.1	0.87	KLK12	ENSG00000186474.15	0.96	AC074121.4	ENSG00000223402.1	0.98	OR5M2P	ENSG00000254752.1	0.95	LINC00626	ENSG00000225826.1	0.94	SCML2P1	ENSG00000264127.1	0.98	RP11-190D6.1	ENSG00000279991.1	0.84
RP11-542M13.1	ENSG00000279604.1	1.00	OR51L1	ENSG00000176798.1	0.86	URAD	ENSG00000183463.5	0.90	HOXC11	ENSG00000123388.4	0.95	RN7SL144P	ENSG00000242559.3	0.99	AMER3	ENSG00000178171.10	0.89	RN7SL849P	ENSG00000243115.3	0.82	FOXB1	ENSG00000171956.6	0.86	CRACR2A	ENSG00000130038.9	0.96	RP11-789C1.1	ENSG00000250266.1	0.93	RP11-760D2.12	ENSG00000271047.1	0.95	HSPB3	ENSG00000169271.2	0.92	PAEP	ENSG00000122133.16	0.94	TRAV30	ENSG00000259092.1	0.81
RP4-745K6.1	ENSG00000227743.1	1.00	NEUROG3	ENSG00000122859.4	0.86	LYPD8	ENSG00000259823.5	0.90	GS1-120K12.4	ENSG00000260976.1	0.94	AC004911.2	ENSG00000226592.1	0.99	CXADRP2	ENSG00000258712.2	0.89	IGKV2-14	ENSG00000253265.1	0.82	RPL17P17	ENSG00000223409.1	0.82	TPSG1	ENSG00000116176.6	0.95	RP1-37N7.1	ENSG00000264177.1	0.93	PSAT1P4	ENSG00000224962.4	0.95	BFSP1	ENSG00000125864.11	0.91	RP11-89K18.1	ENSG00000231743.1	0.94	SERPINA9	ENSG00000170054.14	0.81
RP11-508O18.1	ENSG00000239454.1	1.00	LA16c-312E8.4	ENSG00000279930.1	0.85	GUCA2A	ENSG00000197273.3	0.90	POU4F1	ENSG00000152192.7	0.92	OR11J5P	ENSG00000258494.1	0.99	AMER2	ENSG00000165566.12	0.88	RN7SKP258	ENSG00000252960.1	0.82	FABP5P14	ENSG00000234588.1	0.82	NXPE1	ENSG00000095110.7	0.95	RP11-503C24.6	ENSG00000224417.2	0.92	GLRXP	ENSG00000228234.1	0.95	SATB2	ENSG00000119042.16	0.91	PCDH9-AS3	ENSG00000225263.1	0.94	KIR3DL3	ENSG00000242019.1	0.80
CTC-384G19.1	ENSG00000249349.1	1.00	GFRA4	ENSG00000125861.14	0.85	NXPE1	ENSG00000095110.7	0.90	HOXC10	ENSG00000180818.4	0.91	RP11-484L7.1	ENSG00000250422.1	0.99	HTR1D	ENSG00000179546.4	0.88	OR7E145P	ENSG00000235855.3	0.82	CTD-2113L7.1	ENSG00000248969.1	0.82	GALNT8	ENSG00000130035.6	0.94	RP11-23E10.4	ENSG00000261405.2	0.92	RP11-475J5.11	ENSG00000270230.1	0.94	CSMD2	ENSG00000121904.17	0.91	MTHFD2P3	ENSG00000231112.1	0.94	LINC01436	ENSG00000231106.2	0.78
RP4-682C21.5	ENSG00000178193.5	1.00	TTLL8	ENSG00000138892.11	0.85	MIR192	ENSG00000207648.2	0.89	GABRA2	ENSG00000151834.15	0.90	SNORA70G	ENSG00000206650.1	0.99	SLC26A3	ENSG00000091138.12	0.87	RP11-69M1.1	ENSG00000240739.1	0.82	LINC00659	ENSG00000228705.1	0.82	BRINP3	ENSG00000162670.10	0.93	RP11-244B22.10	ENSG00000280180.1	0.92	NPBWR2	ENSG00000125522.3	0.90	IZUMO2	ENSG00000161652.12	0.91	RP11-526P5.2	ENSG00000235281.1	0.94	IGLV4-60	ENSG00000211639.2	0.78
RP11-29O13.1	ENSG00000264040.1	1.00	SCML2P1	ENSG00000264127.1	0.84	RP11-172C16.5	ENSG00000270204.1	0.89	GRIN2D	ENSG00000105464.3	0.89	XXbac-BPGBPG24O18.1	ENSG00000270935.1	0.99	RP11-15H20.2	ENSG00000269471.1	0.87	CH17-212P11.6	ENSG00000282359.1	0.82	RP11-10N16.3	ENSG00000232298.2	0.82	MUC2	ENSG00000198788.8	0.92	AP1M2	ENSG00000129354.11	0.92	FREM2-AS1	ENSG00000225350.1	0.85	RP11-384F7.1	ENSG00000243276.5	0.91	RP11-154F14.3	ENSG00000280284.1	0.94	CTD-2509G16.3	ENSG00000258878.1	0.78
RP11-119F7.6	ENSG00000270494.1	1.00	GP2	ENSG00000169347.16	0.83	RN7SL680P	ENSG00000275337.1	0.89	PCMTD1P3	ENSG00000234800.2	0.88	CTB-22K14.1	ENSG00000279043.1	0.99	RP11-254F7.1	ENSG00000260476.1	0.87	ZNF736P7Y	ENSG00000241200.1	0.82	FAM197Y7	ENSG00000228383.6	0.81	RP5-1180D12.1	ENSG00000280202.1	0.92	RP11-486A14.1	ENSG00000257512.1	0.92	RP11-528M18.2	ENSG00000279798.1	0.83	HDAC1P2	ENSG00000233012.2	0.91	RP11-557B23.3	ENSG00000266858.1	0.94	IGHV3-16	ENSG00000211944.2	0.78
RP11-467I20.3	ENSG00000228844.1	1.00	GPR139	ENSG00000180269.7	0.82	MIR320E	ENSG00000211513.4	0.89	CDX2	ENSG00000165556.9	0.88	RP11-474N8.9	ENSG00000278400.1	0.99	SLC22A20	ENSG00000197847.12	0.87	MYH1	ENSG00000109061.9	0.82	PABPC1P13	ENSG00000260307.2	0.79	RP11-234B24.6	ENSG00000255639.2	0.91	RNF186	ENSG00000178828.6	0.92	MIR181A1HG	ENSG00000229989.3	0.83	RP11-417E7.2	ENSG00000261039.2	0.91	RP11-1292F20.1	ENSG00000259822.2	0.94	AC073628.1	ENSG00000233605.2	0.78
CENPUP1	ENSG00000255075.1	1.00	TPH1	ENSG00000129167.9	0.82	CTB-179I1.3	ENSG00000270669.1	0.89	GNG4	ENSG00000168243.10	0.88	EEF1A1P26	ENSG00000233167.1	0.99	HOTTIP	ENSG00000243766.7	0.87	LINC01549	ENSG00000232560.6	0.76	RP11-488I20.9	ENSG00000260073.2	0.78	RP11-461F11.3	ENSG00000259582.3	0.90	SLC15A1	ENSG00000088386.15	0.92	OR4G11P	ENSG00000240361.1	0.82	CH17-140K24.6	ENSG00000279375.1	0.91	OR8A3P	ENSG00000255315.1	0.94	RP11-56P9.4	ENSG00000255527.1	0.78
RP11-179H18.5	ENSG00000227437.1	1.00	SFTA3	ENSG00000229415.9	0.82	RNA5SP502	ENSG00000199564.1	0.89	LINC00958	ENSG00000251381.6	0.87	RP11-535N6.2	ENSG00000255155.1	0.99	RP11-444E17.6	ENSG00000272442.2	0.86	IGLV5-37	ENSG00000211654.2	0.74	bP-2189O9.3	ENSG00000279579.3	0.78	ADIPOR2	ENSG00000006831.9	0.90	CLDN7	ENSG00000181885.18	0.92	SLITRK2	ENSG00000185985.8	0.81	RP11-403A3.3	ENSG00000275830.1	0.91	RP11-598D12.1	ENSG00000259990.2	0.93	RP11-451O13.1	ENSG00000236957.7	0.78
RP11-184I16.3	ENSG00000233674.2	1.00	MMP26	ENSG00000167346.7	0.82	AC003989.3	ENSG00000243621.1	0.89	RP11-91K11.2	ENSG00000235434.1	0.87	SETP2	ENSG00000258893.1	0.99	DNAH17-AS1	ENSG00000267432.5	0.86	IGLC7	ENSG00000211685.3	0.73	AP005901.1	ENSG00000215512.9	0.77	LA16c-321D4.2	ENSG00000262482.1	0.89	TMPRSS9	ENSG00000178297.12	0.92	AC067960.1	ENSG00000234455.1	0.79	CACNG4	ENSG00000075461.5	0.91	SPACA1	ENSG00000118434.8	0.93	RP11-1023P17.2	ENSG00000253924.1	0.78
FAF2P1	ENSG00000228759.1	1.00	RP11-300M24.1	ENSG00000227455.2	0.81	Y_RNA	ENSG00000201635.1	0.89	CTB-31N19.4	ENSG00000271609.1	0.87	UBTFL3	ENSG00000204699.4	0.99	SOHLH1	ENSG00000165643.10	0.86				FAM197Y8	ENSG00000225560.6	0.77	RP11-234B24.2	ENSG00000255474.1	0.89	SCGB2A1	ENSG00000124939.5	0.92	PRDM9	ENSG00000164256.9	0.74	CD109	ENSG00000156535.13	0.90	FGF7	ENSG00000140285.9	0.92	SAMSN1-AS1	ENSG00000223662.1	0.78
RP11-197P3.1	ENSG00000224297.2	1.00	RP11-88E10.4	ENSG00000277159.1	0.81	RP11-101B14.1	ENSG00000250480.3	0.89	RP11-760D2.10	ENSG00000213067.2	0.87	MARK2P10	ENSG00000227284.2	0.99	GTF2IP6	ENSG00000266736.1	0.86				FAM197Y2	ENSG00000234803.7	0.76	B4GALNT2	ENSG00000167080.8	0.89	HNF4A	ENSG00000101076.16	0.92	RP11-1259L22.1	ENSG00000253698.1	0.71	IGFL3	ENSG00000188624.2	0.90	RP11-711K1.7	ENSG00000255790.5	0.91	AP001605.4	ENSG00000236332.1	0.78
AC064847.4	ENSG00000217718.1	1.00	CNGA4	ENSG00000132259.12	0.80	RP11-494G9.1	ENSG00000276411.1	0.89	RP11-42O15.2	ENSG00000233020.1	0.87	Metazoa_SRP	ENSG00000275293.1	0.99	AC016831.7	ENSG00000233559.1	0.86				SPEF2	ENSG00000152582.12	0.76	LINC00393	ENSG00000224853.1	0.89	MAGEA4	ENSG00000147381.11	0.92				RP11-94A24.1	ENSG00000255364.1	0.90	OTUD1	ENSG00000165312.6	0.91	CTD-2277K2.1	ENSG00000258882.1	0.78
NPM1P23	ENSG00000242109.1	1.00	SPAG11B	ENSG00000164871.17	0.80	Y_RNA	ENSG00000206847.1	0.89	PLCH1	ENSG00000114805.16	0.87	RP11-275A14.1	ENSG00000277646.1	0.99	PASD1	ENSG00000166049.10	0.86				CTD-3214H19.6	ENSG00000268204.1	0.76	TAAR1	ENSG00000146399.1	0.89	AC080094.1	ENSG00000237670.1	0.92				AC087491.2	ENSG00000214546.3	0.90	KCNK2	ENSG00000082482.13	0.90	AC010149.4	ENSG00000235419.5	0.78
MIR3976HG	ENSG00000261738.6	1.00	AC003989.4	ENSG00000227948.4	0.80	RP11-692C24.3	ENSG00000258540.1	0.89	RP5-1011O1.2	ENSG00000232498.1	0.86	SLC25A3P1	ENSG00000236253.7	0.99	KRTAP4-1	ENSG00000198443.6	0.86				RP11-414C16.1	ENSG00000233216.1	0.76	DUTP3	ENSG00000226857.1	0.88	VN1R33P	ENSG00000227426.1	0.92				PCDHAC2	ENSG00000243232.4	0.90	MCHR2	ENSG00000152034.10	0.89	IGLJ2	ENSG00000211676.2	0.78
RP11-568A7.4	ENSG00000280707.2	1.00	MEOX2-AS1	ENSG00000229108.1	0.80	COX6CP18	ENSG00000236041.1	0.89	FGF9	ENSG00000102678.6	0.86	ADGRG4	ENSG00000156920.10	0.99	CTD-3064H18.4	ENSG00000180458.2	0.86				C1orf158	ENSG00000157330.9	0.75	IGFALS	ENSG00000099769.5	0.87	RP11-434E6.2	ENSG00000261803.1	0.92				RP13-266I11.1	ENSG00000271400.1	0.90	HDAC11	ENSG00000163517.14	0.88	IGHV7-81	ENSG00000211979.2	0.78
MTND2P11	ENSG00000237124.1	1.00	RP11-626P14.1	ENSG00000257845.1	0.80	MIR5195	ENSG00000265929.1	0.89	ATOH1	ENSG00000172238.4	0.86	OR5B15P	ENSG00000273408.1	0.99	BAAT	ENSG00000136881.11	0.86				FAM197Y5	ENSG00000225516.6	0.75	CCDC83	ENSG00000150676.12	0.87	RP11-434I12.3	ENSG00000253339.1	0.92				AC144450.2	ENSG00000203635.2	0.90	RNU4-89P	ENSG00000272359.1	0.88	RP11-223P11.2	ENSG00000232935.2	0.78
ITCH-AS1	ENSG00000236388.1	1.00	GRP	ENSG00000134443.9	0.79	OR5F1	ENSG00000149133.1	0.89	RP11-44F14.9	ENSG00000279741.1	0.86	AC012456.3	ENSG00000203643.3	0.99	RP11-275E15.3	ENSG00000280703.1	0.86				FAM197Y3	ENSG00000230066.5	0.74	RP11-158J3.2	ENSG00000248285.1	0.86	CTD-2339L15.3	ENSG00000259254.1	0.92				AC096669.3	ENSG00000224568.1	0.90	MTND5P27	ENSG00000225045.1	0.88	RP11-99E15.3	ENSG00000258566.2	0.78
RP11-479F13.1	ENSG00000271146.1	1.00	AC108039.3	ENSG00000229831.2	0.79	RPS29P12	ENSG00000243664.1	0.89	TAS2R38	ENSG00000257138.1	0.86	AC133104.2	ENSG00000234903.1	0.99	BAATP1	ENSG00000227411.1	0.86				FAM197Y4	ENSG00000274196.4	0.74	LINC00923	ENSG00000251209.7	0.86	LINC00383	ENSG00000237534.1	0.92				CNGB1	ENSG00000070729.13	0.90	MESTP2	ENSG00000259558.1	0.88	RNU4-5P	ENSG00000272160.1	0.78
RP11-19F9.1	ENSG00000243516.1	1.00	SCN3A	ENSG00000153253.15	0.78	AC233280.3	ENSG00000276635.1	0.89	RBMX2P5	ENSG00000227087.4	0.85	ADAM5	ENSG00000196115.12	0.99	RP11-989E6.1	ENSG00000259934.1	0.86				RP11-1137G4.4	ENSG00000269761.1	0.74	RP11-412P11.1	ENSG00000248837.5	0.86	PRDX3P3	ENSG00000234701.1	0.92				CEACAM1	ENSG00000079385.21	0.90	OR8A2P	ENSG00000255510.1	0.87	AP001171.1	ENSG00000233236.1	0.78
SRRM1P2	ENSG00000242195.1	1.00	TEKT5	ENSG00000153060.7	0.77	AL157359.4	ENSG00000232193.1	0.89	HOXA7	ENSG00000122592.7	0.85	RP11-501H19.2	ENSG00000229731.1	0.99	PRSS38	ENSG00000185888.5	0.86				NPAP1	ENSG00000185823.3	0.74	RP11-116G8.5	ENSG00000256462.1	0.86	RP11-1217F2.9	ENSG00000236692.1	0.92				RP11-781P6.1	ENSG00000265069.1	0.90	LINC01502	ENSG00000237339.5	0.86	MIAT_exon1	ENSG00000278404.1	0.78
RP13-130D24.1	ENSG00000234889.2	1.00	TMEM132D	ENSG00000151952.14	0.76	NXPE4	ENSG00000137634.9	0.89	CTD-3074O7.7	ENSG00000254596.1	0.85	OR11K2P	ENSG00000258438.3	0.99	CTAG1A	ENSG00000268651.2	0.86				bP-2189O9.1	ENSG00000280243.1	0.73	CYP2A7	ENSG00000198077.10	0.86	AC011525.2	ENSG00000261400.1	0.92				CTC-340A15.2	ENSG00000241956.9	0.90	NAPSA	ENSG00000131400.7	0.86	C12orf74	ENSG00000214215.3	0.78
RP11-74E22.5	ENSG00000272770.1	1.00	DRAIC	ENSG00000245750.7	0.75	RP11-234B24.2	ENSG00000255474.1	0.89	RP11-174O3.3	ENSG00000240661.1	0.85	RP11-804M7.2	ENSG00000258411.2	0.99	AP001607.1	ENSG00000234052.1	0.86				FAM197Y6	ENSG00000237802.6	0.73	FZD9	ENSG00000188763.4	0.85	RP11-1134I14.2	ENSG00000248347.3	0.92				ZP4	ENSG00000116996.9	0.90	U3	ENSG00000221638.2	0.86	AC008069.1	ENSG00000223536.5	0.78
RP11-138H8.2	ENSG00000259532.1	1.00	RP11-313C15.2	ENSG00000278193.1	0.75	NOX1	ENSG00000007952.17	0.88	AC087491.2	ENSG00000214546.3	0.84	ZNF734P	ENSG00000197990.6	0.99	KCNE5	ENSG00000176076.7	0.86				C1QTNF9B	ENSG00000205863.9	0.73	LINC01351	ENSG00000237457.6	0.85	RP1-163M9.7	ENSG00000279151.1	0.92				MKRN9P	ENSG00000258128.2	0.90	CTD-2503I6.1	ENSG00000257120.1	0.85	RPL32P9	ENSG00000241143.1	0.78
RP11-522B15.7	ENSG00000259534.1	1.00	RP11-65F13.3	ENSG00000278905.1	0.74	RP11-77K12.7	ENSG00000260092.1	0.88	KRTAP3-3	ENSG00000212899.2	0.84	AC020956.3	ENSG00000278239.1	0.99	LINC01218	ENSG00000251636.1	0.86				PRCAT47	ENSG00000260896.5	0.73	RP11-77K12.7	ENSG00000260092.1	0.85	RP11-79E3.2	ENSG00000250723.5	0.92				LINC01105	ENSG00000232044.6	0.90	DEFB106A	ENSG00000186579.2	0.84	RP11-624L4.2	ENSG00000259269.1	0.78
RP1-131F15.3	ENSG00000280058.1	1.00	LINC01044	ENSG00000223626.1	0.73	RP3-446N13.5	ENSG00000275212.1	0.88	KCNE3	ENSG00000175538.10	0.84	CTB-162E12.1	ENSG00000262961.1	0.99	RP11-35N6.6	ENSG00000230328.2	0.86				RP1-46F2.3	ENSG00000258240.5	0.73	CCL24	ENSG00000106178.6	0.85	RP11-513O17.1	ENSG00000251142.1	0.92				RP11-233E12.2	ENSG00000232551.2	0.90	OR4A5	ENSG00000221840.3	0.84	IGLV11-55	ENSG00000211641.2	0.78
RP11-1109M24.12	ENSG00000264562.1	1.00	STMN4	ENSG00000015592.16	0.73	TRIM60P19	ENSG00000235737.1	0.87	RPIA	ENSG00000153574.8	0.84	RP5-1147A1.2	ENSG00000273444.1	0.99	BNIP3P38	ENSG00000268469.1	0.86				RP11-254F7.1	ENSG00000260476.1	0.73	GCM2	ENSG00000124827.6	0.84	OR10AK1P	ENSG00000254807.1	0.92				RP11-183E24.2	ENSG00000259320.1	0.90	RP11-358D14.2	ENSG00000226390.1	0.83	RP11-122D10.1	ENSG00000259280.1	0.78
RP11-42D20.1	ENSG00000233565.1	1.00	LINC01551	ENSG00000186960.10	0.71	PCK1	ENSG00000124253.10	0.87	AL672296.1	ENSG00000229663.1	0.83	RP11-281H11.1	ENSG00000254007.1	0.99	VSTM2B	ENSG00000187135.7	0.86				TKTL1	ENSG00000007350.16	0.73	ATOH1	ENSG00000172238.4	0.84	GS1-600G8.3	ENSG00000231216.1	0.92				RP11-80H8.3	ENSG00000243733.1	0.90	RP11-304L19.1	ENSG00000259933.6	0.81	SIGLECL1	ENSG00000179213.13	0.78
KRT18P64	ENSG00000213211.2	1.00	CTC-303L1.2	ENSG00000270133.1	0.71	AP006748.1	ENSG00000223400.1	0.87	FBXW10	ENSG00000171931.12	0.83	RP11-219C24.8	ENSG00000231219.1	0.99	RP11-1038A11.2	ENSG00000256218.1	0.86				PHKG1P4	ENSG00000229508.2	0.73	RP11-608O21.1	ENSG00000248515.1	0.84	CYCSP41	ENSG00000278678.1	0.92				RP11-321E2.4	ENSG00000249662.5	0.90	SNORA21	ENSG00000199293.1	0.81	RP11-384J4.1	ENSG00000257612.1	0.78
UGT1A12P	ENSG00000228949.1	1.00	NR0B2	ENSG00000131910.4	0.70	CHST5	ENSG00000135702.14	0.85	PRR15	ENSG00000176532.3	0.83	DDX43P1	ENSG00000248295.2	0.99	CTAG1B	ENSG00000184033.12	0.86				RP11-79C6.2	ENSG00000279737.1	0.73	HSPA2	ENSG00000126803.9	0.84	RP11-125N22.4	ENSG00000257794.1	0.92				RP1-288L1.4	ENSG00000237316.1	0.90	KRT18P66	ENSG00000235626.2	0.81	ACTG1P18	ENSG00000218475.2	0.78
RP11-307A17.2	ENSG00000271519.1	1.00				AQP8	ENSG00000103375.10	0.85	LINC00621	ENSG00000262619.1	0.83	LRRC10	ENSG00000198812.4	0.99	NXF2B	ENSG00000269437.6	0.86				CTC-505O3.2	ENSG00000248709.1	0.73	CLCA1	ENSG00000016490.15	0.83	RP5-984P4.1	ENSG00000226405.1	0.92				RP11-321E2.12	ENSG00000250667.1	0.90	CHP2	ENSG00000166869.2	0.81	PCED1CP	ENSG00000231254.2	0.78
AC010146.1	ENSG00000229568.1	1.00				OR10G4	ENSG00000254737.1	0.84	HOXA11-AS	ENSG00000240990.9	0.83	OR4C1P	ENSG00000254576.1	0.99	NXF2	ENSG00000269405.6	0.86				RP11-343K8.3	ENSG00000264914.1	0.73	CALML3	ENSG00000178363.4	0.83	EIF4A2P5	ENSG00000255490.1	0.92				RP11-221J22.1	ENSG00000214407.3	0.90	AC013436.6	ENSG00000228596.1	0.80	SCARNA11	ENSG00000252992.1	0.78
RP11-544D21.2	ENSG00000259776.1	1.00				RP11-747D18.1	ENSG00000239205.1	0.84	ALG1L3P	ENSG00000251087.3	0.82	GSX1	ENSG00000169840.4	0.99	BZW2	ENSG00000136261.14	0.86				KRTAP6-3	ENSG00000212938.3	0.73	IZUMO1R	ENSG00000183560.8	0.83	U3	ENSG00000212551.2	0.92				RPL23AP41	ENSG00000224085.3	0.90	FLYWCH2	ENSG00000162076.12	0.80	AC064834.2	ENSG00000223466.1	0.78
AC009478.1	ENSG00000225258.1	1.00				FRMD1	ENSG00000153303.16	0.84	RP11-173C1.1	ENSG00000269210.2	0.82	AHCYP8	ENSG00000242529.1	0.99	H2BFM	ENSG00000101812.12	0.86				OR8K3	ENSG00000181689.1	0.73	IQCG	ENSG00000114473.13	0.83	AP000358.5	ENSG00000237601.1	0.92				SMAD5-AS1_4	ENSG00000274934.1	0.90	NDUFS5P1	ENSG00000218424.2	0.80	IGKV2D-18	ENSG00000254220.1	0.78
CTD-3046C4.1	ENSG00000253205.5	1.00				RNF186	ENSG00000178828.6	0.83	DSG1-AS1	ENSG00000266729.5	0.82	HNRNPA3P14	ENSG00000224494.1	0.99	PRSS29P	ENSG00000196364.9	0.86				FAM8A2P	ENSG00000254722.1	0.73	MYCL	ENSG00000116990.10	0.83	OR7E43P	ENSG00000249844.1	0.92				RP11-789A21.1	ENSG00000259044.1	0.90	RP11-304L19.3	ENSG00000261123.1	0.80	CTA-392C11.1	ENSG00000253802.1	0.78
RP11-210K20.6	ENSG00000276486.1	1.00				RP11-436F23.1	ENSG00000249330.1	0.83	ZIC1	ENSG00000152977.9	0.82	RP11-330A16.1	ENSG00000229646.2	0.99	RPL23AP69	ENSG00000235315.2	0.86				RPS27P20	ENSG00000240121.1	0.73	NXPE4	ENSG00000137634.9	0.83	RN7SL125P	ENSG00000244514.3	0.92				RP11-404L6.2	ENSG00000253787.1	0.90	AC018717.1	ENSG00000231557.1	0.79	Metazoa_SRP	ENSG00000281003.1	0.78
OR8K2P	ENSG00000255134.1	1.00				FABP1	ENSG00000163586.9	0.83	AC007255.8	ENSG00000223813.2	0.82	KRT18P43	ENSG00000240128.1	0.99	TRPC6P	ENSG00000223484.6	0.86				RP11-565A3.2	ENSG00000250590.5	0.73	CIB4	ENSG00000157884.10	0.82	RP11-1292F20.1	ENSG00000259822.2	0.92				RP11-92J19.3	ENSG00000237002.6	0.90	RP11-31H5.1	ENSG00000225625.4	0.79	HMGB1P11	ENSG00000230547.1	0.78
RP11-561C5.7	ENSG00000259317.1	1.00				RP11-216L13.19	ENSG00000273066.5	0.82	ARG2	ENSG00000081181.7	0.82	RP5-937E21.1	ENSG00000229322.1	0.99	LINC01511	ENSG00000250584.2	0.86				AC105921.5	ENSG00000236007.1	0.73	RP11-507B12.1	ENSG00000259675.1	0.82	OR7A15P	ENSG00000176923.4	0.92				RPL32P35	ENSG00000223995.2	0.90	LINC01541	ENSG00000260676.5	0.79	RP11-43P5.3	ENSG00000279666.1	0.78
RP11-364M6.1	ENSG00000241281.1	1.00				PHGR1	ENSG00000233041.8	0.82	LINC01555	ENSG00000180869.4	0.81	RN7SKP205	ENSG00000222931.1	0.99	ZNF488	ENSG00000265763.3	0.86				RP11-101E14.3	ENSG00000233415.1	0.73	RASD2	ENSG00000100302.6	0.82	SOCS2P2	ENSG00000224465.1	0.92				RP11-456O19.5	ENSG00000267399.1	0.90	ABCB5	ENSG00000004846.16	0.79	HNRNPA1P20	ENSG00000205412.5	0.78
SNORA74	ENSG00000252129.1	1.00				CCDC34P1	ENSG00000250556.1	0.81	RP11-451G4.2	ENSG00000240045.1	0.81	LINC01007	ENSG00000233123.1	0.99	LINC01216	ENSG00000250223.1	0.86				CLYBL-AS1	ENSG00000234303.2	0.73	AP006621.8	ENSG00000255108.1	0.82	CTD-2144E22.11	ENSG00000262885.1	0.92				RP11-413E1.4	ENSG00000230735.1	0.90	LA16c-325D7.1	ENSG00000263325.1	0.79	HOMER2P2	ENSG00000238275.2	0.78
RP5-921G16.2	ENSG00000241324.1	1.00				NOS2P1	ENSG00000264216.1	0.81	RP11-44F14.8	ENSG00000262714.1	0.81	KB-1568E2.1	ENSG00000253656.1	0.99	ERVV-2	ENSG00000268964.1	0.85				UBA52P3	ENSG00000243023.2	0.73	AC104654.1	ENSG00000214691.7	0.82	RP11-125N22.3	ENSG00000257899.1	0.92				RP11-142J21.2	ENSG00000259740.1	0.90	SYNE2	ENSG00000054654.15	0.78	RP11-203B7.2	ENSG00000260303.1	0.78
PAICSP7	ENSG00000232293.2	1.00				RN7SKP54	ENSG00000222636.1	0.81	ROS1	ENSG00000047936.10	0.81	OR5B1P	ENSG00000233499.1	0.99	CTD-2377D24.4	ENSG00000242407.1	0.85				AC105342.1	ENSG00000234429.1	0.73	LRRC26	ENSG00000184709.7	0.82	RP11-676F20.1	ENSG00000254874.1	0.92				AC005538.5	ENSG00000237581.1	0.90	CTD-2533G20.1	ENSG00000264189.1	0.78	RP11-564C24.1	ENSG00000243116.1	0.78
AP000648.4	ENSG00000279299.1	1.00				WASF1P1	ENSG00000227597.1	0.81	STEAP2-AS1	ENSG00000227646.7	0.81	RP11-87E22.1	ENSG00000253142.1	0.99	RP11-22D3.2	ENSG00000261815.1	0.85				CH17-13I23.1	ENSG00000274927.1	0.73	CDH7	ENSG00000081138.13	0.82	GUSBP10	ENSG00000224723.1	0.92				RP11-536K17.1	ENSG00000253672.1	0.90	QTRT1P1	ENSG00000270524.1	0.78	AC104024.2	ENSG00000230969.2	0.78
RP11-703M24.5	ENSG00000266049.1	1.00				RP11-478K15.6	ENSG00000230731.2	0.81	STK31	ENSG00000196335.12	0.80	S100A11P2	ENSG00000236592.5	0.99	LLPHP2	ENSG00000235514.1	0.85				RP1-138O17.1	ENSG00000280223.1	0.73	MUC12	ENSG00000205277.9	0.82	RP5-1065O2.4	ENSG00000280350.1	0.92				RP11-255A11.2	ENSG00000228072.1	0.90	RN7SL398P	ENSG00000244356.3	0.77	CTD-2024I7.1	ENSG00000240974.1	0.78
RP11-124G5.2	ENSG00000255563.1	1.00				MUC17	ENSG00000169876.13	0.80	GRAMD2	ENSG00000175318.11	0.80	CTB-1048E9.7	ENSG00000230203.1	0.99	SPATS1	ENSG00000249481.6	0.85				RP11-983G14.1	ENSG00000280709.2	0.73	TFF3	ENSG00000160180.15	0.81	RP13-16H11.2	ENSG00000227932.1	0.92				RP11-404J23.1	ENSG00000250993.1	0.90	NIPA2P2	ENSG00000241022.1	0.77	RP1-172N19.4	ENSG00000213698.2	0.78
OR5I1	ENSG00000167825.3	1.00				RP1-10C16.1	ENSG00000235736.1	0.79	ECEL1P2	ENSG00000244280.1	0.80	RP11-143E21.1	ENSG00000242963.1	0.99	GNG13	ENSG00000127588.4	0.85				IGHVII-49-1	ENSG00000253386.1	0.73	TAPBPL	ENSG00000139192.11	0.81	RP11-760D2.13	ENSG00000278205.1	0.92				RNA5SP290	ENSG00000252942.1	0.90	MRPL35P1	ENSG00000220868.2	0.77	RP11-343P9.1	ENSG00000254372.1	0.78
OR7L1P	ENSG00000232787.1	1.00				UGT2B17	ENSG00000197888.2	0.79	OR5M6P	ENSG00000254603.1	0.80	BRD7P1	ENSG00000259043.1	0.99	RP5-963E22.4	ENSG00000231977.1	0.85				MTND5P7	ENSG00000230531.1	0.73	CD9	ENSG00000010278.11	0.81	RP11-244B22.11	ENSG00000261800.1	0.92				MRPL35P1	ENSG00000220868.2	0.90	SST	ENSG00000157005.3	0.76	OR4P1P	ENSG00000188439.3	0.78
RP11-467I20.2	ENSG00000224359.2	1.00				RP11-102C16.3	ENSG00000227907.1	0.79	U47924.27	ENSG00000257084.1	0.80	MTND1P2	ENSG00000235646.1	0.99	RP11-1082L8.1	ENSG00000250428.1	0.85				DCAF8L1	ENSG00000226372.2	0.73	KCNJ18	ENSG00000260458.3	0.81	RP11-696F10.1	ENSG00000243945.1	0.92				AC113331.9	ENSG00000236897.1	0.90	FAM84B	ENSG00000168672.3	0.76	RP1-151B14.9	ENSG00000226233.1	0.78
RP11-720D4.3	ENSG00000255183.1	1.00				RP11-251P6.1	ENSG00000230768.7	0.79	RP11-44F14.10	ENSG00000280027.1	0.80	RN7SL26P	ENSG00000242014.3	0.99	TCEB1P24	ENSG00000228410.5	0.85				RP4-705O1.1	ENSG00000230324.1	0.73	DYRK4	ENSG00000010219.13	0.81	RP11-725M22.1	ENSG00000250597.5	0.92				AP002856.6	ENSG00000227125.1	0.90	LSP1P2	ENSG00000240665.1	0.76	AC108868.6	ENSG00000232001.1	0.78
RP11-343P9.1	ENSG00000254372.1	1.00				CTC-228N24.2	ENSG00000250603.1	0.78	DQX1	ENSG00000144045.13	0.80	AC079305.8	ENSG00000229337.1	0.99	FYTTD1P1	ENSG00000234502.2	0.85				RP11-22N12.2	ENSG00000264050.1	0.73	AGR2	ENSG00000106541.11	0.81	POU6F2-AS1	ENSG00000224122.1	0.92				RP11-1147P1.1	ENSG00000279543.1	0.90	RP11-89K10.1	ENSG00000254286.5	0.75	LL22NC03-24A12.8	ENSG00000231392.1	0.78
RP1-228P16.4	ENSG00000257985.1	1.00				RPL23AP35	ENSG00000232568.2	0.78	EPPIN	ENSG00000101448.13	0.80	RP11-21M7.2	ENSG00000270575.1	0.99	DCX	ENSG00000077279.16	0.85				RP1-321E8.5	ENSG00000278646.1	0.73	CTD-2589M5.4	ENSG00000255007.1	0.80	RN7SL474P	ENSG00000264092.2	0.92				RP4-735N21.1	ENSG00000233983.2	0.90	HABP2	ENSG00000148702.14	0.75	KLHL6-AS1	ENSG00000242522.1	0.78
RN7SL204P	ENSG00000264676.2	1.00				SATB2-AS1	ENSG00000225953.2	0.77	RP11-645C24.4	ENSG00000257408.1	0.80	RPL35P4	ENSG00000213783.4	0.99	SPACA1	ENSG00000118434.8	0.85				RP5-905H7.10	ENSG00000227545.1	0.73	RP11-215P8.4	ENSG00000250564.1	0.80	FGF7P1	ENSG00000264061.1	0.92				RP11-643G5.1	ENSG00000279248.1	0.90	KCNQ2	ENSG00000075043.17	0.75	RPS26P54	ENSG00000224161.3	0.78
RP11-354P17.15	ENSG00000261696.1	1.00				RP11-692C24.1	ENSG00000258954.1	0.77	SLC7A8	ENSG00000092068.18	0.79	RP11-346L1.2	ENSG00000253344.1	0.99	UTS2R	ENSG00000181408.3	0.85				RHOXF2	ENSG00000131721.4	0.73	FFAR4	ENSG00000186188.10	0.80	IGHV3-50	ENSG00000253241.1	0.92				RP11-182L7.1	ENSG00000259734.1	0.90	LINC01320	ENSG00000228262.8	0.74	RN7SL253P	ENSG00000241652.3	0.78
AP001891.1	ENSG00000236437.1	1.00				RN7SKP170	ENSG00000199420.1	0.77	AOC1	ENSG00000002726.19	0.79	RP11-252M21.6	ENSG00000238185.1	0.99	PDX1	ENSG00000139515.5	0.85				PGAM1P12	ENSG00000250825.1	0.73	SHD	ENSG00000105251.10	0.80	OR7E159P	ENSG00000258849.1	0.92				MKNK2P1	ENSG00000233533.1	0.90	RP11-318K15.2	ENSG00000254325.2	0.74	CTC-326K19.6	ENSG00000269179.1	0.78
CTD-2233C11.2	ENSG00000250583.1	1.00				NAT8	ENSG00000144035.3	0.76	MUCL1	ENSG00000172551.10	0.79	RP11-631F7.1	ENSG00000224658.1	0.99	ZCCHC16	ENSG00000187823.3	0.85				OR8K3	ENSG00000280314.1	0.73	GUCA2A	ENSG00000197273.3	0.80	AC007253.1	ENSG00000235653.1	0.92				AC002401.1	ENSG00000236472.1	0.90	PFN1P12	ENSG00000226028.2	0.73	RP11-201O14.2	ENSG00000232768.1	0.78
RP11-386B1.1	ENSG00000254482.1	1.00				GCG	ENSG00000115263.14	0.75	RP11-478H13.1	ENSG00000236716.1	0.79	RN7SL837P	ENSG00000240502.2	0.99	NUTM1	ENSG00000184507.15	0.85				RPSAP64	ENSG00000227721.1	0.73	PON1	ENSG00000005421.8	0.79	OR14A16	ENSG00000196772.3	0.92				AC068286.1	ENSG00000235127.1	0.90	FTLP17	ENSG00000228347.1	0.73	RP11-168P8.5	ENSG00000236769.1	0.78
RPL6P21	ENSG00000223445.1	1.00				RP11-1212A22.7	ENSG00000276484.1	0.75	LA16c-335H7.2	ENSG00000279136.1	0.79	RP11-397J20.1	ENSG00000239696.3	0.99	AC011899.10	ENSG00000231980.1	0.85				ATP6V0E1P3	ENSG00000238038.1	0.73	JSRP1	ENSG00000167476.10	0.79	PHKBP2	ENSG00000258467.1	0.92				RP5-1046G13.2	ENSG00000218732.1	0.90	RN7SL615P	ENSG00000263989.2	0.72	Metazoa_SRP	ENSG00000275293.1	0.78
MUSK	ENSG00000030304.12	1.00				SLC6A7	ENSG00000011083.8	0.75	HOXA10-AS	ENSG00000253187.2	0.79	RP11-1085N6.4	ENSG00000258703.1	0.99	AC055876.1	ENSG00000256951.1	0.85				RP11-570J4.1	ENSG00000279864.1	0.73	SCML2P1	ENSG00000264127.1	0.79	RPS15AP32	ENSG00000242461.1	0.92				CSPG4P4Y	ENSG00000172294.7	0.90	EEF1A2	ENSG00000101210.10	0.72	GS1-410F4.5	ENSG00000256835.1	0.78
TDRD1	ENSG00000095627.9	1.00				PRAP1	ENSG00000165828.13	0.75	TRIM54	ENSG00000138100.13	0.79	UGT1A12P	ENSG00000228949.1	0.99	RP11-100G15.12	ENSG00000275756.1	0.85				LINC00934	ENSG00000281196.1	0.73	XBP1	ENSG00000100219.16	0.79	CH507-236L23.4	ENSG00000279477.1	0.92				RP11-191F9.3	ENSG00000278874.1	0.90	RIMKLBP1	ENSG00000189089.5	0.72	RP1-153P14.8	ENSG00000204110.6	0.78
CTD-2024D23.1	ENSG00000254082.5	1.00				RP11-231N9.1	ENSG00000237971.1	0.75	NXPH1	ENSG00000122584.12	0.78	RP11-42L13.3	ENSG00000270430.1	0.99	RBMXP4	ENSG00000249465.1	0.85				FLYWCH1P1	ENSG00000239516.1	0.73	BHMT	ENSG00000145692.14	0.78	RP11-134G8.10	ENSG00000224818.1	0.92				OR51A4	ENSG00000205497.3	0.90	RP11-95P9.1	ENSG00000236580.1	0.72	AC006077.4	ENSG00000270892.1	0.78
RP11-475J5.4	ENSG00000270225.1	1.00				GNG13	ENSG00000127588.4	0.75	RP11-7I15.4	ENSG00000254675.1	0.78	FGF7P1	ENSG00000264061.1	0.99	CACNA1E	ENSG00000198216.10	0.85				LINC01370	ENSG00000237767.1	0.73	FCGBP	ENSG00000275395.4	0.78	CDKN2AIPNLP3	ENSG00000224351.2	0.92				OR51F1	ENSG00000188069.4	0.90	AC130709.1	ENSG00000214525.4	0.71	RP11-164H13.1	ENSG00000257275.6	0.78
CARD18	ENSG00000255501.1	1.00				LINC01594	ENSG00000225328.1	0.75	RP11-190J1.3	ENSG00000224817.1	0.78	RP5-1132H15.3	ENSG00000229886.1	0.99	TUBB8P7	ENSG00000261812.5	0.85				RP11-24P4.1	ENSG00000254334.1	0.73	CLDN3	ENSG00000165215.6	0.78	PGK2	ENSG00000170950.4	0.92				U8	ENSG00000239142.1	0.90	FTX_3	ENSG00000275254.1	0.71	CSTL1	ENSG00000125823.12	0.78
SLC25A24P1	ENSG00000241361.8	1.00				RP11-67M9.1	ENSG00000254171.1	0.74	RP11-231E6.1	ENSG00000243081.2	0.77	HMGN2P10	ENSG00000231261.1	0.99	RP1-97J1.2	ENSG00000227012.2	0.85				RP11-1217F2.9	ENSG00000236692.1	0.73	ARL9	ENSG00000196503.2	0.78	RP11-158A14.1	ENSG00000253189.1	0.92				RPL23AP46	ENSG00000213122.4	0.90	OR52E7P	ENSG00000233563.1	0.71	RP11-691H4.4	ENSG00000267694.1	0.78
OLFM3	ENSG00000118733.16	1.00				OR5AR1	ENSG00000279911.1	0.74	APOBEC1	ENSG00000111701.6	0.77	RP11-479I16.2	ENSG00000271052.1	0.99	IGFL1P1	ENSG00000268879.1	0.85				RBMY3AP	ENSG00000231436.1	0.73	TRERNA1	ENSG00000231265.1	0.78	CTD-2532K18.1	ENSG00000251670.1	0.92				SLC16A12-AS1	ENSG00000234452.5	0.90	CTD-2385L22.2	ENSG00000279756.1	0.71	RP11-25P11.2	ENSG00000253657.1	0.78
ERICH3-AS1	ENSG00000234497.5	0.99				RP11-388E23.3	ENSG00000258887.2	0.73	FAM132A	ENSG00000184163.3	0.77	SCARNA14	ENSG00000252712.1	0.99	FAM87A	ENSG00000182366.9	0.85				TUBB8P5	ENSG00000254381.3	0.73	RPL10L	ENSG00000165496.4	0.77	RBM22P3	ENSG00000226485.1	0.92				RN7SL861P	ENSG00000243173.3	0.90	RP11-476H20.1	ENSG00000231714.1	0.70	RP11-126O1.6	ENSG00000275418.1	0.78
RPS14P8	ENSG00000239528.1	0.99				ATP6V1G1P3	ENSG00000224662.2	0.73	KLK12	ENSG00000186474.15	0.77	HIST1H2APS2	ENSG00000242387.1	0.99	ZNF209P	ENSG00000269138.1	0.85				TSPY15P	ENSG00000236786.1	0.73	RP11-3B12.5	ENSG00000224899.1	0.77	GLULP6	ENSG00000215043.2	0.92				AC006227.1	ENSG00000229457.1	0.90				AC121251.1	ENSG00000228171.1	0.78
RP11-406A9.2	ENSG00000258743.5	0.99				RGS13	ENSG00000127074.14	0.73	NYNRIN	ENSG00000205978.5	0.77	RFPL4AP7	ENSG00000254268.1	0.99	LINC01606	ENSG00000253301.5	0.85				PDLIM1P3	ENSG00000264172.1	0.73	LINC00114	ENSG00000223806.7	0.77	RN7SL272P	ENSG00000242360.3	0.92				NRBF2P1	ENSG00000267797.1	0.90				RP11-219A15.2	ENSG00000264729.1	0.78
RP11-462G2.1	ENSG00000237643.1	0.99				SH2D6	ENSG00000152292.16	0.73	CTC-497E21.3	ENSG00000254670.1	0.77	RP11-478B9.1	ENSG00000257319.1	0.99	ACPT	ENSG00000142513.5	0.84				VN1R7P	ENSG00000275592.1	0.73	CCDC60	ENSG00000183273.6	0.77	OR7C2	ENSG00000127529.7	0.92				CTD-2043I16.1	ENSG00000267509.5	0.90				U4	ENSG00000278374.1	0.78
OR8B7P	ENSG00000254976.1	0.99				KIAA0226L	ENSG00000102445.18	0.73	KRT33B	ENSG00000131738.9	0.77	MRPS36P2	ENSG00000249539.1	0.99	LINC00552	ENSG00000279770.1	0.84				FAM197Y1	ENSG00000224336.2	0.73	CHST5	ENSG00000135702.14	0.77	RP11-367G12.1	ENSG00000280024.1	0.92				RP11-62L10.1	ENSG00000230161.1	0.90				MSRB1P1	ENSG00000213926.3	0.78
RP4-738P11.3	ENSG00000227777.1	0.99				SLC17A4	ENSG00000146039.10	0.71	PIR	ENSG00000087842.10	0.77	RP11-90K17.2	ENSG00000255005.1	0.99	RP11-32B5.8	ENSG00000268531.3	0.84				RN7SL457P	ENSG00000263794.2	0.73	CDX2	ENSG00000165556.9	0.77	RP11-324C10.1	ENSG00000237473.1	0.92				RP11-510M2.1	ENSG00000261348.1	0.90				IGKV2-26	ENSG00000254098.1	0.78
LINC01361	ENSG00000236268.5	0.99				LINC01080	ENSG00000281721.1	0.71	NXF2	ENSG00000269405.6	0.77	RPL23AP71	ENSG00000237450.5	0.99	LINC00954	ENSG00000228784.7	0.84				RP11-21I4.3	ENSG00000274813.1	0.73	C12orf57	ENSG00000111678.10	0.77	RNU1-141P	ENSG00000201493.1	0.92				KNOP1P3	ENSG00000224344.1	0.90				IGHVIII-2-1	ENSG00000253780.1	0.78
LINC01162	ENSG00000232790.2	0.98				GPA33	ENSG00000143167.11	0.70	NEK3	ENSG00000136098.16	0.77	RP11-491H9.4	ENSG00000276156.1	0.99	KIAA2012	ENSG00000182329.10	0.84				AC114808.3	ENSG00000235403.1	0.73	FBXL14	ENSG00000171823.6	0.76	OR5T2	ENSG00000181718.5	0.92				RP11-30G8.1	ENSG00000258853.1	0.90				NHEG1	ENSG00000225391.5	0.78
DNAH17-AS1	ENSG00000267432.5	0.98				HNRNPA1P26	ENSG00000239345.2	0.70	CTD-2147F2.1	ENSG00000259485.1	0.77	AC009517.2	ENSG00000224469.1	0.99	RP6-114E22.1	ENSG00000266869.1	0.84				IFNL4P1	ENSG00000272311.1	0.73	RP11-100K18.1	ENSG00000266213.1	0.76	RP11-636N17.1	ENSG00000262818.1	0.92				RP11-431M3.1	ENSG00000254302.1	0.90				AC111200.8	ENSG00000226114.1	0.78
CYP4F62P	ENSG00000239402.3	0.97				TSPAN8	ENSG00000127324.8	0.70	RP11-74J13.9	ENSG00000277662.1	0.77	SNRPFP4	ENSG00000235627.1	0.99	AC006262.5	ENSG00000268621.5	0.84				CT47A6	ENSG00000226023.5	0.73	GFRA1	ENSG00000151892.14	0.76	RP3-368B9.2	ENSG00000250681.1	0.92				CICP12	ENSG00000225270.1	0.90				RP11-567G24.3	ENSG00000233735.5	0.78
RP11-434D2.11	ENSG00000263946.1	0.97							RP11-248G5.9	ENSG00000273523.1	0.77	RPL23AP41	ENSG00000224085.3	0.99	C6orf222	ENSG00000189325.6	0.84				OR4A2P	ENSG00000227547.3	0.73	RP11-550A5.2	ENSG00000254431.1	0.76	OR51A5P	ENSG00000225003.1	0.92				OR51F1	ENSG00000280021.1	0.90				RN7SKP214	ENSG00000201078.1	0.78
LINC00282	ENSG00000281106.2	0.97							C6orf15	ENSG00000204542.2	0.76	RP11-565N2.1	ENSG00000261453.1	0.99	SLC45A2	ENSG00000164175.14	0.84				CALM2P4	ENSG00000233662.1	0.73	LINC01124	ENSG00000222033.1	0.76	RP11-125O5.2	ENSG00000257062.6	0.92				AC098614.1	ENSG00000223968.1	0.90				CD200R1L	ENSG00000206531.10	0.78
RP4-620E11.5	ENSG00000229398.1	0.97							CTD-3094K11.1	ENSG00000259704.1	0.76	RP11-331H2.3	ENSG00000227667.1	0.99	SLC6A10P	ENSG00000214617.9	0.84				RBM22P3	ENSG00000226485.1	0.73	SP5	ENSG00000204335.3	0.76	RPL35P8	ENSG00000226142.2	0.92				Y_RNA	ENSG00000207416.1	0.90				RP11-372E1.4	ENSG00000243818.4	0.78
RP11-243M5.3	ENSG00000279581.1	0.97							KLF5	ENSG00000102554.13	0.76	RN7SL371P	ENSG00000266210.2	0.99	CRYGD	ENSG00000118231.4	0.84				OR2AD1P	ENSG00000223677.1	0.73	TRIM72	ENSG00000177238.13	0.76	RP11-128P17.4	ENSG00000273119.1	0.92				UGT2B25P	ENSG00000215110.7	0.90				NAV2-IT1	ENSG00000255270.1	0.78
RP11-131J3.1	ENSG00000224698.1	0.96							CHL1	ENSG00000134121.9	0.76	RP11-266I3.8	ENSG00000278319.1	0.99	GPBAR1	ENSG00000179921.14	0.84				RN7SKP76	ENSG00000201289.1	0.73	APOBEC1	ENSG00000111701.6	0.76	RP11-528A4.3	ENSG00000223986.1	0.92				CTC-459F4.7	ENSG00000267389.2	0.90				RP1-245M18.2	ENSG00000217083.1	0.78
RP11-483I13.2	ENSG00000238122.1	0.96							HCG11	ENSG00000228223.2	0.76	SUB1P2	ENSG00000258737.2	0.99	PIGZ	ENSG00000119227.7	0.84				RP11-122F24.1	ENSG00000250974.1	0.73	OPRK1	ENSG00000082556.10	0.76	RPL7AP3	ENSG00000256243.2	0.92				AC019330.1	ENSG00000225421.1	0.90				WARS2P1	ENSG00000227209.1	0.78
RP11-548L20.1	ENSG00000248685.5	0.96							PHBP8	ENSG00000240471.1	0.76	U51244.2	ENSG00000228481.1	0.99	RP11-32B5.5	ENSG00000258767.1	0.84				AP000859.4	ENSG00000254442.1	0.73	NXPE2	ENSG00000204361.8	0.75	ZNF734P	ENSG00000197990.6	0.92				CSPG4P3Y	ENSG00000172342.5	0.90				RP11-43A14.2	ENSG00000282375.1	0.78
NBPF4	ENSG00000196427.13	0.96							RP11-114B7.6	ENSG00000224409.1	0.76	RP11-392E22.3	ENSG00000243085.1	0.99	RP11-602N24.3	ENSG00000272795.1	0.84				AP1B1P1	ENSG00000234479.2	0.73	OTUB2	ENSG00000089723.9	0.75	RP11-94B19.1	ENSG00000264260.1	0.92				CTB-120L21.1	ENSG00000254246.1	0.90				LL22NC03-30E12.13	ENSG00000227710.1	0.78
OR2AF1P	ENSG00000235730.1	0.96							FUT9	ENSG00000172461.10	0.76	RP11-383G10.1	ENSG00000236108.1	0.99	RP11-139G7.1	ENSG00000253340.1	0.84				RP11-154F14.3	ENSG00000280284.1	0.73	AP000438.2	ENSG00000257002.1	0.75	RP5-1170K4.7	ENSG00000231467.2	0.92				RNU1-105P	ENSG00000200340.1	0.90				IGKV2-29	ENSG00000253998.3	0.78
RP11-554A11.8	ENSG00000261070.1	0.96							BORA	ENSG00000136122.15	0.76	AC024619.2	ENSG00000238007.1	0.99	DNAH17	ENSG00000187775.16	0.84				AC009517.2	ENSG00000224469.1	0.73	SCNN1A	ENSG00000111319.12	0.75	CYP4F10P	ENSG00000267241.2	0.92				CH17-31A6.1	ENSG00000282686.1	0.90				IGKV2D-29	ENSG00000243264.2	0.78
CTD-2123J17.2	ENSG00000280009.1	0.96							CHRM3	ENSG00000133019.11	0.76	IGKV1D-42	ENSG00000211633.3	0.99	SYT3	ENSG00000213023.9	0.84				CT47A5	ENSG00000237957.5	0.73	LINC01550	ENSG00000246223.8	0.75	RP1-231P7P.1	ENSG00000224027.1	0.92				ECM1P2	ENSG00000249995.1	0.90				IGKV2-18	ENSG00000254157.1	0.78
ADAM3A	ENSG00000197475.11	0.95							CXCL5	ENSG00000163735.6	0.76	RP3-522P13.3	ENSG00000235733.2	0.99	IRX1	ENSG00000170549.3	0.84				RP4-754E20__A.5	ENSG00000236117.1	0.73	C4BPAP1	ENSG00000224462.2	0.75	IGHVII-49-1	ENSG00000253386.1	0.92				RXFP3	ENSG00000182631.6	0.90				IGLV3-6	ENSG00000253448.1	0.78
RP11-34D15.2	ENSG00000231188.1	0.95							PTGS2	ENSG00000073756.11	0.76	RP11-471N19.1	ENSG00000257308.1	0.99	GS1-120K12.4	ENSG00000260976.1	0.84				RP11-260A9.1	ENSG00000263433.1	0.73	MLF2	ENSG00000089693.10	0.75	RP11-132N15.2	ENSG00000236412.1	0.92				USP9YP21	ENSG00000227635.1	0.90				RP11-470M17.2	ENSG00000254143.1	0.78
RP11-169L17.5	ENSG00000237661.1	0.95							CLCP2	ENSG00000226158.1	0.75	RP11-1094H24.3	ENSG00000248172.1	0.99	UBE2U	ENSG00000177414.13	0.84				VN1R8P	ENSG00000219280.1	0.73	LINC00570	ENSG00000224177.6	0.75	TRIM51EP	ENSG00000237706.4	0.92				AC113133.1	ENSG00000274705.1	0.90				RP11-165H4.2	ENSG00000236976.1	0.78
PSMA3P	ENSG00000258563.2	0.95							HOXB4	ENSG00000182742.5	0.75	RP11-124G5.3	ENSG00000255388.5	0.99	RP1-46F2.3	ENSG00000258240.5	0.84				RP11-149P24.1	ENSG00000253248.5	0.73	KLHL32	ENSG00000186231.16	0.75	RP13-238N7.2	ENSG00000231356.1	0.92				XXyac-YX65C7_A.3	ENSG00000233085.5	0.90				IGKV1-9	ENSG00000241755.1	0.78
RP11-467I20.6	ENSG00000231440.1	0.95							STON2	ENSG00000140022.9	0.75	RP11-53L24.1	ENSG00000259817.1	0.99	LINC01164	ENSG00000189275.3	0.84				RP1-84O15.2	ENSG00000253108.1	0.73	RP11-725G5.2	ENSG00000258630.1	0.74	OR52J1P	ENSG00000203560.3	0.92				RP11-541H12.1	ENSG00000230748.1	0.90				IGKV2D-26	ENSG00000211623.2	0.78
RP3-525N10.2	ENSG00000230910.2	0.94							DNAJA4	ENSG00000140403.12	0.75	RP13-895J2.11	ENSG00000280150.1	0.99	RP1-232L22__A.1	ENSG00000229090.2	0.83				RN7SKP285	ENSG00000222069.1	0.73	SLC22A23	ENSG00000137266.14	0.74	RP4-726N1.2	ENSG00000229262.1	0.92				RPLP0P7	ENSG00000238069.1	0.90				IGHV3-33	ENSG00000211955.2	0.78
RP11-688I9.5	ENSG00000279358.1	0.94							RP6-74O6.6	ENSG00000272824.1	0.75	RP11-16P20.3	ENSG00000253875.1	0.99	RP11-403B2.10	ENSG00000274499.1	0.83				ISCA1P3	ENSG00000261965.1	0.73	COL16A1	ENSG00000084636.17	0.74	FAM27E4	ENSG00000204805.8	0.92				RP11-296L22.8	ENSG00000230729.1	0.90				IGKV1D-43	ENSG00000242580.1	0.78
PSMA8	ENSG00000154611.14	0.93							CTA-363E6.2	ENSG00000259925.1	0.75	RP13-455A7.1	ENSG00000230345.1	0.99	CTA-109P11.1	ENSG00000235198.1	0.83				RMST_6	ENSG00000275971.1	0.73	ITLN1	ENSG00000179914.4	0.74	RP11-746M1.2	ENSG00000266009.1	0.92				RPP40P2	ENSG00000271190.1	0.90				IGHV1-69-2	ENSG00000280411.1	0.78
RP11-433J8.1	ENSG00000258702.1	0.93							DNAH3	ENSG00000158486.13	0.75	AC006947.1	ENSG00000229330.2	0.99	RP11-495K9.5	ENSG00000255933.1	0.83				RP11-804L24.2	ENSG00000259077.1	0.73	RP4-569D19.8	ENSG00000273044.1	0.74	LINC01029	ENSG00000265843.2	0.92				RP11-322I2.1	ENSG00000238176.1	0.90				IGHV1-69	ENSG00000211973.2	0.78
RP11-58O3.1	ENSG00000253156.1	0.93							HOXA11	ENSG00000005073.5	0.75	RP11-191A15.2	ENSG00000217805.2	0.99	RP5-857K21.2	ENSG00000235146.2	0.83				CENPIP1	ENSG00000224778.1	0.73	AC011523.2	ENSG00000267968.1	0.73	XAGE5	ENSG00000171405.12	0.92				OR2F1	ENSG00000213215.3	0.90				IGKV1-17	ENSG00000240382.3	0.78
RP11-776H12.1	ENSG00000226476.2	0.93							OAT	ENSG00000065154.11	0.74	RP1-169I5.4	ENSG00000225238.1	0.99	LINC01076	ENSG00000225105.2	0.83				CTBP2P1	ENSG00000235857.1	0.73	AC053503.4	ENSG00000229525.1	0.73	OR5M6P	ENSG00000254603.1	0.92				NDUFA5P4	ENSG00000233659.1	0.90				FCRL4	ENSG00000163518.10	0.78
MAGEA6	ENSG00000197172.10	0.93							AC004854.4	ENSG00000234183.1	0.74	AP000431.2	ENSG00000229289.1	0.99	RAPSN	ENSG00000165917.9	0.83				AC018804.3	ENSG00000224087.1	0.73	RP11-302L19.1	ENSG00000232197.1	0.73	CSMD2-AS1	ENSG00000231163.5	0.92				RP11-723G8.1	ENSG00000260457.2	0.90				IGKV1-37	ENSG00000239862.1	0.78
RP11-20G6.2	ENSG00000261090.1	0.93							GS1-306C12.1	ENSG00000279525.1	0.74	LYZL4	ENSG00000157093.8	0.99	CTD-2589M5.4	ENSG00000255007.1	0.83				RP11-244B22.5	ENSG00000261274.1	0.73	CTD-2147F2.2	ENSG00000259664.2	0.73	CUBNP1	ENSG00000231009.1	0.92				RP11-815I9.3	ENSG00000262262.1	0.90				IGKV3-15	ENSG00000244437.1	0.78

## Sheet: LINC00907
BRCA Tumor			ESCA Tumor			KICH Tumor			KIRC Tumor			LGG Tumor			LUSC Tumor			PAAD Tumor			READ Tumor			SKCM Tumor			UCS Tumor			UVM Tumor
CTD-2247C11.2	ENSG00000251506.1	0.82	RP11-550H2.2	ENSG00000230027.1	0.87	LL21NC02-1C16.1	ENSG00000273027.1	0.86	LINC01251	ENSG00000233776.5	0.78	TMPRSS7	ENSG00000176040.13	0.84	RPL5P21	ENSG00000218689.2	0.82	SERPINA10	ENSG00000140093.9	0.94	RP11-1C1.4	ENSG00000249396.1	0.77	RPS23P9	ENSG00000231586.2	0.91	PCDH9-AS1	ENSG00000234527.1	0.79	CASP8AP2	ENSG00000118412.12	0.81
RP11-574H6.1	ENSG00000261036.1	0.81	AC079112.1	ENSG00000235968.1	0.86	C4orf47	ENSG00000205129.8	0.85	CTB-129P6.7	ENSG00000280087.1	0.77	ACMSD	ENSG00000153086.13	0.83	OR11I1P	ENSG00000232791.3	0.81	AC002511.3	ENSG00000232680.2	0.93	FCN3	ENSG00000142748.12	0.75	RN7SL617P	ENSG00000241162.3	0.91	FLJ26850	ENSG00000204666.3	0.78	CTD-3222D19.8	ENSG00000279529.1	0.81
RP11-195B3.1	ENSG00000227338.1	0.81	RPS3AP44	ENSG00000234031.1	0.86	AC142472.6	ENSG00000276728.1	0.85	MIR663AHG	ENSG00000227195.8	0.76	PLCZ1	ENSG00000139151.14	0.83	SPATA31D4	ENSG00000189357.8	0.81	TCP11X2	ENSG00000215029.8	0.92	MT2A	ENSG00000125148.6	0.75	RP11-359M6.2	ENSG00000257604.1	0.91	KCNJ1	ENSG00000151704.15	0.77	STAM-AS1	ENSG00000260589.1	0.80
RP11-570L15.1	ENSG00000258268.1	0.80	RPS4XP8	ENSG00000219146.1	0.86	RP11-602N24.3	ENSG00000272795.1	0.85	RP11-298D21.1	ENSG00000260788.5	0.76	AC005281.1	ENSG00000226690.6	0.83	AF001550.7	ENSG00000262983.1	0.81	ACSL6	ENSG00000164398.12	0.92	CTB-43E15.1	ENSG00000253959.1	0.75	CTD-3107M8.1	ENSG00000253346.1	0.91	CLDN19	ENSG00000164007.10	0.77	RP11-336K24.12	ENSG00000273002.1	0.80
LECT1	ENSG00000136110.12	0.80	LINC01047	ENSG00000232225.6	0.86	ADCY10P1	ENSG00000161912.17	0.84	RP11-417J1.8	ENSG00000280373.1	0.76	ANKUB1	ENSG00000206199.9	0.82	RP11-415K20.2	ENSG00000279625.1	0.81	APLP1	ENSG00000105290.11	0.91	C8G	ENSG00000176919.11	0.75	CH507-254M2.4	ENSG00000279709.1	0.91	PRR15L	ENSG00000167183.2	0.76	CEP83	ENSG00000173588.14	0.80
CTD-2247C11.5	ENSG00000250529.1	0.80	EEF1A1P20	ENSG00000249963.1	0.86	HTR2C	ENSG00000147246.9	0.84	A2ML1	ENSG00000166535.19	0.76	LHX8	ENSG00000162624.14	0.82	JADRR	ENSG00000280711.1	0.81	RP11-23E10.6	ENSG00000278848.2	0.90	LIPC	ENSG00000166035.10	0.75	TCP11X3P	ENSG00000251525.6	0.91	DNAH5	ENSG00000039139.9	0.76	AGAP9	ENSG00000204172.11	0.80
AC000111.6	ENSG00000083622.8	0.79	RP11-300M24.1	ENSG00000227455.2	0.85	SAPCD1	ENSG00000228727.8	0.84	LRRC39	ENSG00000122477.12	0.76	OR4F6	ENSG00000184140.5	0.82	OR52E8	ENSG00000183269.5	0.81	MYT1	ENSG00000196132.11	0.90	GAMT	ENSG00000130005.11	0.75	OR4K3	ENSG00000176290.7	0.91	LINC00472	ENSG00000233237.6	0.75	AC011290.5	ENSG00000236015.1	0.79
DEFT1P2	ENSG00000232039.2	0.78	CCDC26	ENSG00000229140.8	0.85	RP1-234P15.4	ENSG00000225793.2	0.84	NLRP9	ENSG00000185792.9	0.75	KERA	ENSG00000139330.5	0.82	NOL8P1	ENSG00000248327.1	0.81	DNAJC3-AS1	ENSG00000247400.3	0.89	RP11-469A15.2	ENSG00000230623.2	0.74	RP11-503L23.1	ENSG00000249708.1	0.91	ERBB4	ENSG00000178568.13	0.75	ZDHHC17	ENSG00000186908.14	0.79
RP11-275H4.1	ENSG00000241231.1	0.77	KRT18P6	ENSG00000258783.1	0.85	RPS3AP2	ENSG00000219027.2	0.84	RP11-359N11.1	ENSG00000230631.1	0.75	RP11-420K14.2	ENSG00000268433.1	0.81	RAC1P8	ENSG00000234033.1	0.80	CCDC13-AS1	ENSG00000173811.10	0.88	ANGPTL6	ENSG00000130812.10	0.74	GS1-433O24.1	ENSG00000237019.1	0.91	SLC34A1	ENSG00000131183.10	0.75	ZNF518A	ENSG00000177853.14	0.79
CTD-2247C11.1	ENSG00000250481.1	0.77	RP11-497D6.5	ENSG00000272397.1	0.84	SSR4P1	ENSG00000235374.2	0.84	RP11-160C18.2	ENSG00000261303.5	0.74	AC003986.6	ENSG00000232821.1	0.81	RP11-48L13.1	ENSG00000229834.1	0.80	TMEM63C	ENSG00000165548.10	0.88	APOA2	ENSG00000158874.11	0.74	RP11-2L13.1	ENSG00000231984.1	0.91	AC104794.4	ENSG00000233502.1	0.74	RP3-368A4.5	ENSG00000271430.1	0.79
RP11-864G5.8	ENSG00000271600.1	0.77	RP11-5A1.1	ENSG00000279034.1	0.84	IFT74-AS1	ENSG00000234676.1	0.84	BSPH1	ENSG00000188334.3	0.74	RASSF9	ENSG00000198774.4	0.81	RP11-548K12.8	ENSG00000250923.1	0.80	AC002511.2	ENSG00000233214.1	0.88	RP11-130L8.2	ENSG00000269976.1	0.74	LINC01584	ENSG00000260477.6	0.91	RP11-1053O12.1	ENSG00000258536.1	0.74	LINC00174	ENSG00000179406.6	0.79
LINC00479	ENSG00000236384.7	0.75	RP11-326L9.2	ENSG00000277319.1	0.84	C2orf81	ENSG00000159239.11	0.84	UBE2R2-AS1	ENSG00000235481.2	0.72	AKAP14	ENSG00000186471.12	0.81	RP11-962G15.2	ENSG00000274489.1	0.80	DNAH9	ENSG00000007174.17	0.88	GLTPD2	ENSG00000182327.7	0.74	Metazoa_SRP	ENSG00000275975.1	0.91	RP5-991C6.2	ENSG00000219702.1	0.73	RGS17	ENSG00000091844.7	0.79
AC092580.3	ENSG00000230515.1	0.74	RPL6P21	ENSG00000223445.1	0.84	LINC00488	ENSG00000214381.4	0.84	PAX7	ENSG00000009709.11	0.72	RP11-438O11.1	ENSG00000215805.3	0.81	DEFB118	ENSG00000131068.3	0.80	TCP11X1	ENSG00000268235.6	0.88	TFR2	ENSG00000106327.12	0.74	RP11-1028N23.4	ENSG00000257407.1	0.91	PCDHA14	ENSG00000249504.3	0.73	RP1-20N2.8	ENSG00000278206.1	0.79
RP1-293L8.2	ENSG00000224506.2	0.73	RP11-488L1.1	ENSG00000273098.1	0.84	SNHG18	ENSG00000250786.1	0.83	ANGPTL5	ENSG00000187151.7	0.72	FNDC7	ENSG00000143107.8	0.80	BOD1L2	ENSG00000228075.4	0.80	CDO1	ENSG00000129596.4	0.88	PROZ	ENSG00000126231.13	0.74	RP11-619J20.1	ENSG00000249678.1	0.91	RP11-2I17.4	ENSG00000260173.1	0.72	RP11-20I23.2	ENSG00000279520.1	0.79
LINC00112	ENSG00000232401.1	0.72	CCT6P2	ENSG00000250526.1	0.84	RP11-563N4.1	ENSG00000272716.1	0.83	CTD-3193K9.11	ENSG00000273650.1	0.70	NPAP1P7	ENSG00000277357.1	0.80	RP11-508O18.1	ENSG00000239454.1	0.80	TTC41P	ENSG00000214198.7	0.88	SDS	ENSG00000135094.10	0.74	RP11-375N9.2	ENSG00000231398.1	0.91	RP11-538P18.2	ENSG00000243150.5	0.72	AGAP5	ENSG00000172650.12	0.79
LINC01487	ENSG00000241336.1	0.71	CTD-2335O3.3	ENSG00000251125.1	0.84	AC012146.7	ENSG00000234327.7	0.83	KCNT1	ENSG00000107147.11	0.70	C1orf87	ENSG00000162598.13	0.80	OR5M7P	ENSG00000254490.1	0.80	PAK3	ENSG00000077264.14	0.87	PAQR9-AS1	ENSG00000241570.8	0.74	RN7SL685P	ENSG00000242315.3	0.91	MIR137HG	ENSG00000225206.5	0.72	RP11-511H23.2	ENSG00000279048.1	0.79
RP11-400N13.2	ENSG00000228437.5	0.71	RP11-263G22.1	ENSG00000279218.1	0.84	RP4-612B15.3	ENSG00000261737.1	0.83				ATOH1	ENSG00000172238.4	0.80	LINC01360	ENSG00000233973.5	0.80	FAM117A	ENSG00000121104.7	0.87	LINC01093	ENSG00000249173.5	0.74	RP1-85D24.3	ENSG00000271365.1	0.91	RP11-296I10.3	ENSG00000247228.2	0.72	CEP95	ENSG00000258890.6	0.78
CTD-2297D10.1	ENSG00000250866.1	0.70	LINC00976	ENSG00000281657.2	0.83	GPATCH3	ENSG00000198746.12	0.83				RASSF6	ENSG00000169435.13	0.79	OR8B12	ENSG00000170953.2	0.80	RP11-1260E13.3	ENSG00000262558.1	0.87	CRYAA	ENSG00000160202.7	0.74	RP11-796L2.1	ENSG00000250082.1	0.91	PRODH2	ENSG00000250799.9	0.72	CEP162	ENSG00000135315.11	0.78
			AC062016.3	ENSG00000235871.1	0.83	RP11-133K1.6	ENSG00000259198.1	0.83				MAP3K19	ENSG00000176601.11	0.79	RP11-292D4.3	ENSG00000260090.1	0.80	XKR7	ENSG00000260903.2	0.87	RP11-263G22.1	ENSG00000279218.1	0.74	RN7SKP149	ENSG00000199878.1	0.91	IGHV7-81	ENSG00000211979.2	0.71	ADAT2	ENSG00000189007.15	0.78
			RP11-746P2.6	ENSG00000277544.1	0.83	RP11-390P24.1	ENSG00000273576.1	0.83				RP11-493L12.3	ENSG00000257925.1	0.79	OR52R1	ENSG00000279270.1	0.80	RP11-268G13.1	ENSG00000261411.1	0.87	LCAT	ENSG00000213398.7	0.74	LALBA	ENSG00000167531.6	0.90	RP1-40E16.9	ENSG00000230269.6	0.71	VDAC1P8	ENSG00000229036.7	0.78
			AC007364.1	ENSG00000162947.4	0.83	TMEM79	ENSG00000163472.18	0.83				MCOLN3	ENSG00000055732.12	0.79	RP11-542H15.1	ENSG00000279663.2	0.80	RP11-598F7.4	ENSG00000249695.6	0.87	MT1X	ENSG00000187193.8	0.74	RP11-255G12.3	ENSG00000258808.1	0.87	CDH16	ENSG00000166589.12	0.71	RP11-400F19.18	ENSG00000267632.1	0.78
			OR4A40P	ENSG00000254832.1	0.83	ITGB5	ENSG00000082781.11	0.83				CFAP54	ENSG00000188596.9	0.79	OR52R1	ENSG00000176937.9	0.80	PCDHA1	ENSG00000204970.9	0.87	ATF5	ENSG00000169136.8	0.74	RP4-753D5.3	ENSG00000216913.2	0.85	RP11-136F16.2	ENSG00000257220.1	0.71	CH17-264L24.1	ENSG00000279278.1	0.78
			AC092106.2	ENSG00000213295.3	0.83	CTC-260E6.4	ENSG00000280079.1	0.83				RP11-475A13.1	ENSG00000259737.6	0.79	RP5-1121H13.1	ENSG00000223651.1	0.80	CTD-2037L6.2	ENSG00000248132.2	0.87	GCGR	ENSG00000215644.9	0.74	CTSLP1	ENSG00000236417.2	0.82	SETP16	ENSG00000254621.1	0.71	MSANTD2	ENSG00000120458.9	0.78
			MTND2P29	ENSG00000233595.2	0.83	GBA	ENSG00000177628.15	0.83				LGALS9B	ENSG00000170298.15	0.79	MTND5P16	ENSG00000243658.1	0.80	GPRASP1	ENSG00000198932.12	0.86	FAM99B	ENSG00000205865.4	0.74	LINC01449	ENSG00000224017.1	0.81	RP11-643A5.3	ENSG00000280362.1	0.70	RP3-368A4.6	ENSG00000271533.1	0.78
			CTD-2160D9.1	ENSG00000250391.1	0.83	AC128709.2	ENSG00000237167.1	0.83				NTS	ENSG00000133636.10	0.79	DNAJB8-AS1	ENSG00000242049.1	0.80	CELF4	ENSG00000101489.18	0.86	AMD1P4	ENSG00000215124.2	0.74	RP11-353J17.3	ENSG00000231590.1	0.81	PCBD1	ENSG00000166228.8	0.70	LINC01125	ENSG00000228486.9	0.78
			RP11-280G9.1	ENSG00000251127.2	0.82	OR8Q1P	ENSG00000255341.1	0.83				DBX1	ENSG00000109851.6	0.79	OR4C15	ENSG00000181939.2	0.80	B9D1	ENSG00000108641.14	0.86	SLC13A5	ENSG00000141485.15	0.74	RP11-73G16.3	ENSG00000249818.1	0.81	RP11-19G24.2	ENSG00000276810.1	0.70	DMTF1	ENSG00000135164.18	0.78
			CTD-2151A2.3	ENSG00000248928.1	0.82	RP1-223E5.4	ENSG00000261071.1	0.83				RP11-541G9.2	ENSG00000257920.1	0.79	AC008072.1	ENSG00000228681.1	0.80	TP53TG3	ENSG00000183632.14	0.86	SERPINA1	ENSG00000197249.12	0.74	MS4A8	ENSG00000166959.7	0.81	SSU72P5	ENSG00000237565.3	0.70	PTGES2-AS1	ENSG00000232850.3	0.78
			CTC-535M15.1	ENSG00000253512.1	0.82	SLC22A1	ENSG00000175003.12	0.83				RP11-395E19.4	ENSG00000274820.1	0.79	KRTAP26-1	ENSG00000197683.4	0.80	CYP46A1	ENSG00000036530.8	0.86	RP11-115J16.1	ENSG00000254235.5	0.74	Metazoa_SRP	ENSG00000277127.1	0.76	POU5F1B	ENSG00000212993.4	0.70	PNISR	ENSG00000132424.14	0.78
			IFNA2	ENSG00000188379.6	0.82	RP11-79E3.3	ENSG00000250954.5	0.82				RP11-32A1.2	ENSG00000275314.1	0.79	RP11-112L18.1	ENSG00000248282.1	0.80	RP11-412D9.4	ENSG00000260329.1	0.86	LINC01554	ENSG00000236882.7	0.74	CYCSP8	ENSG00000232503.1	0.76	PDZK1P1	ENSG00000244211.3	0.70	RP11-121L10.2	ENSG00000280367.1	0.78
			RP11-455J15.1	ENSG00000270593.1	0.82	COX20P2	ENSG00000235013.1	0.82				RP11-192B18.1	ENSG00000271457.1	0.79	PSMA3P	ENSG00000258563.2	0.80	RP11-1260E13.2	ENSG00000262294.1	0.85	SERPINA5	ENSG00000188488.13	0.74	RP11-267N12.1	ENSG00000232892.1	0.76	TMEM75	ENSG00000280055.1	0.70	RAB11FIP1P1	ENSG00000228492.2	0.78
			OR10C1	ENSG00000206474.7	0.82	MORN1	ENSG00000116151.13	0.82				SLC15A1	ENSG00000088386.15	0.78	SPATA2P1	ENSG00000228319.1	0.80	CTD-3149D2.2	ENSG00000279300.1	0.85	GNMT	ENSG00000124713.5	0.74	RN7SKP109	ENSG00000222524.1	0.76	BNIP3P34	ENSG00000269509.1	0.70	RP3-406P24.5	ENSG00000279926.1	0.77
			RP11-475J5.5	ENSG00000271207.1	0.82	AC092106.2	ENSG00000213295.3	0.82				NUP62CL	ENSG00000198088.10	0.78	RP4-697K14.3	ENSG00000230226.1	0.80	HCN2	ENSG00000099822.2	0.85	MAT1A	ENSG00000151224.12	0.74	RP11-678G14.6	ENSG00000274503.1	0.75	CCAT2	ENSG00000280997.1	0.70	RP11-488L18.10	ENSG00000259865.1	0.77
			MTND1P28	ENSG00000230158.1	0.82	GM2AP2	ENSG00000239428.2	0.82				RP1-121G13.2	ENSG00000228082.1	0.78	OR7A17	ENSG00000185385.3	0.80	AL121578.7	ENSG00000229674.1	0.85	GCKR	ENSG00000084734.8	0.74	RP11-689E3.2	ENSG00000267591.1	0.75	DNER	ENSG00000187957.7	0.70	GOLGA6L4	ENSG00000184206.11	0.77
			RP11-627K11.5	ENSG00000270766.1	0.82	DEFB119	ENSG00000180483.6	0.82				ELF3	ENSG00000163435.15	0.78	RP11-812E19.10	ENSG00000260525.1	0.80	ARX	ENSG00000004848.6	0.85	RP4-763G1.2	ENSG00000235200.1	0.74	RP11-149P24.1	ENSG00000253248.5	0.74				RP13-104F24.2	ENSG00000215769.8	0.77
			HMGB1P47	ENSG00000249338.1	0.82	SCG5	ENSG00000166922.8	0.82				EFHC2	ENSG00000183690.12	0.77	RP11-986E7.2	ENSG00000259140.2	0.80	PLD6	ENSG00000179598.5	0.85	SLC22A1	ENSG00000175003.12	0.74	HMGB3P23	ENSG00000235148.2	0.73				RP11-278C7.1	ENSG00000257511.1	0.77
			RP11-185P18.2	ENSG00000258516.1	0.82	CTC-246B18.10	ENSG00000269246.1	0.82				GPR15	ENSG00000154165.4	0.77	RP11-258B16.1	ENSG00000267642.1	0.80	DSCAM	ENSG00000171587.14	0.85	TTC36	ENSG00000172425.10	0.74	OR56A7P	ENSG00000255481.2	0.72				NKTR	ENSG00000114857.17	0.77
			RP11-617J18.1	ENSG00000258375.2	0.82	GPS2	ENSG00000132522.15	0.82				AC003090.1	ENSG00000223561.6	0.77	RP11-617J18.1	ENSG00000258375.2	0.80	BEX1	ENSG00000133169.5	0.85	UGT1A9	ENSG00000241119.1	0.74							DDX26B	ENSG00000165359.14	0.77
			RN7SL814P	ENSG00000244326.3	0.82	RP11-467L13.7	ENSG00000276900.1	0.82				CD36	ENSG00000135218.17	0.76	RP11-428I12.1	ENSG00000256630.1	0.80	QPCT	ENSG00000115828.15	0.85	AKR1D1	ENSG00000122787.14	0.74							CTD-2012K14.5	ENSG00000280214.1	0.77
			SAMD7	ENSG00000187033.9	0.82	SLC2A5	ENSG00000142583.17	0.82				RP11-541G9.1	ENSG00000258131.1	0.76	UBTFL11	ENSG00000233007.1	0.80	CFAP53	ENSG00000172361.5	0.84	EPO	ENSG00000130427.2	0.74							RIMKLBP2	ENSG00000225920.2	0.77
			RN7SL555P	ENSG00000263905.2	0.82	RP11-1105G2.3	ENSG00000258365.1	0.82				OR2U2P	ENSG00000242524.1	0.76	CCNB1IP1P2	ENSG00000230860.1	0.80	TCTN1	ENSG00000204852.15	0.84	SLC2A2	ENSG00000163581.13	0.74							PSMA3-AS1	ENSG00000257621.7	0.77
			RP6-102O10.1	ENSG00000227935.1	0.81	RP11-380N8.7	ENSG00000277368.1	0.82				PTPRQ	ENSG00000139304.12	0.76	IFNWP15	ENSG00000232281.2	0.80	RP11-620J15.3	ENSG00000257698.1	0.84	DBH	ENSG00000123454.10	0.74							MFAP1P1	ENSG00000232489.1	0.77
			OR2G6	ENSG00000188558.5	0.81	UBXN11	ENSG00000158062.20	0.82				RP11-36N20.1	ENSG00000226876.2	0.76	MARK2P15	ENSG00000234931.1	0.80	SLC8A3	ENSG00000100678.18	0.84	SRD5A2	ENSG00000277893.1	0.74							RP13-36G14.4	ENSG00000270223.1	0.77
			MTATP6P2	ENSG00000270307.1	0.81	AC074289.1	ENSG00000225889.7	0.82				FAM74A7	ENSG00000277260.1	0.75	RP11-407P18.1	ENSG00000254579.1	0.80	F7	ENSG00000057593.13	0.84	AADAC	ENSG00000114771.13	0.74							CCDC112	ENSG00000164221.12	0.77
			RP11-1070N10.4	ENSG00000258390.1	0.81	RP11-524F11.2	ENSG00000264666.1	0.82				LRTM1	ENSG00000144771.7	0.75	RP11-278L15.4	ENSG00000239408.1	0.80	UNC13A	ENSG00000130477.14	0.84	RDH16	ENSG00000139547.7	0.74							RP11-147L13.8	ENSG00000267731.1	0.77
			OR4A49P	ENSG00000254472.1	0.81	RP3-337H4.9	ENSG00000271754.1	0.82				CCDC114	ENSG00000105479.15	0.75	RP11-108B14.5	ENSG00000260205.1	0.80	ACMSD	ENSG00000153086.13	0.84	PON1	ENSG00000005421.8	0.74							AC005154.7	ENSG00000244480.1	0.77
			RPL23AP78	ENSG00000269244.1	0.81	SLC25A48	ENSG00000145832.12	0.82				APOBEC4	ENSG00000173627.7	0.75	LINC00430	ENSG00000233528.4	0.80	REM2	ENSG00000139890.9	0.84	BHMT	ENSG00000145692.14	0.74							CD226	ENSG00000150637.8	0.77
			RP11-3P17.4	ENSG00000240567.1	0.81	RP11-254F7.4	ENSG00000272524.1	0.82				WDR78	ENSG00000152763.16	0.75	RP11-32A1.2	ENSG00000275314.1	0.80	CELF3	ENSG00000159409.14	0.84	UGT1A2P	ENSG00000228445.1	0.74							CTD-2547G23.4	ENSG00000274925.1	0.77
			RN7SL366P	ENSG00000266128.2	0.81	CTC-251I16.1	ENSG00000279496.1	0.81				C8orf34-AS1	ENSG00000248801.6	0.75	AC097463.1	ENSG00000226366.1	0.80	KSR2	ENSG00000171435.13	0.84	C5	ENSG00000106804.7	0.74							CTC-524C5.2	ENSG00000263272.1	0.77
			RP4-682C21.5	ENSG00000178193.5	0.81	RP11-498M5.2	ENSG00000251309.1	0.81				AC096664.2	ENSG00000228872.2	0.75	RP11-93G23.2	ENSG00000279324.1	0.80	LINC01146	ENSG00000258867.5	0.84	UGT3A1	ENSG00000145626.11	0.74							LONP2	ENSG00000102910.13	0.77
			DAOA-AS1	ENSG00000232307.1	0.81	RP11-334C17.3	ENSG00000279259.1	0.81				CYSLTR1	ENSG00000173198.5	0.74	RP11-336F14.1	ENSG00000255086.1	0.80	RP11-91H12.4	ENSG00000250820.1	0.84	PRAMEF8	ENSG00000182330.10	0.74							LA16c-358B7.3	ENSG00000261505.1	0.77
			ZNF859P	ENSG00000215887.5	0.81	KRTAP16-1	ENSG00000212657.1	0.81				XXyac-YM21GA2.1	ENSG00000232743.2	0.74	RP11-5P15.1	ENSG00000279256.1	0.80	CTC-505O3.2	ENSG00000248709.1	0.84	ASGR2	ENSG00000161944.16	0.74							CTD-2649C14.2	ENSG00000274460.1	0.77
			RP11-165I9.9	ENSG00000279550.1	0.81	KB-1410C5.2	ENSG00000253679.1	0.81				RP11-122D10.1	ENSG00000259280.1	0.74	IQCF5-AS1	ENSG00000235455.1	0.80	RP11-546D6.3	ENSG00000280120.1	0.83	MASP2	ENSG00000009724.16	0.74							RP11-37C7.3	ENSG00000261136.1	0.77
			MTND2P7	ENSG00000253970.1	0.81	ELFN1	ENSG00000225968.7	0.81				LINC00488	ENSG00000214381.4	0.74	OR2Y1	ENSG00000174339.2	0.80	POTEI	ENSG00000196834.11	0.83	ACADL	ENSG00000115361.7	0.74							RP11-666A8.9	ENSG00000267078.1	0.77
			RP11-182N22.7	ENSG00000215198.3	0.81	RP11-268J15.5	ENSG00000116883.8	0.81				GUCY1B2	ENSG00000123201.14	0.74	AC079779.7	ENSG00000227061.1	0.80	RP11-95O2.1	ENSG00000267651.1	0.83	APOC1P1	ENSG00000214855.9	0.74							HNRNPU-AS1	ENSG00000188206.6	0.77
			bP-21201H5.2	ENSG00000280372.1	0.81	VPS45	ENSG00000136631.12	0.81				CROCC2	ENSG00000226321.5	0.74	RP11-42F12.1	ENSG00000280397.1	0.80	POTEJ	ENSG00000222038.3	0.83	F2	ENSG00000180210.14	0.74							TIA1	ENSG00000116001.15	0.77
			HNRNPA1P32	ENSG00000213778.2	0.81	AC006539.3	ENSG00000268070.1	0.81				RN7SKP291	ENSG00000199831.1	0.73	OR2W4P	ENSG00000216629.1	0.80	CTD-3060P21.1	ENSG00000262884.1	0.83	ETNPPL	ENSG00000164089.8	0.74							SENP7	ENSG00000138468.15	0.77
			CTD-2544L4.1	ENSG00000253107.1	0.81	RP11-51J9.5	ENSG00000271869.1	0.81				RIBC1	ENSG00000158423.16	0.73	RP11-666G4.1	ENSG00000229031.1	0.80	RP11-529E10.6	ENSG00000261643.1	0.83	RP11-1151B14.3	ENSG00000267391.2	0.74							AC007038.7	ENSG00000229127.1	0.76
			OR51F3P	ENSG00000272559.1	0.81	RP11-318E3.9	ENSG00000272764.1	0.81				A4GNT	ENSG00000118017.3	0.73	SPATA31B1P	ENSG00000231649.3	0.80	LRRC10B	ENSG00000204950.3	0.83	SLC22A25	ENSG00000196600.12	0.74							NRBF2P5	ENSG00000270427.1	0.76
			CTB-159G17.3	ENSG00000270518.2	0.81	AC002117.1	ENSG00000224505.2	0.81				RP11-125O5.2	ENSG00000257062.6	0.73	RP3-492P14.2	ENSG00000220537.1	0.80	LA16c-352F7.1	ENSG00000278716.1	0.83	CTC-505O3.2	ENSG00000248709.1	0.74							POLI	ENSG00000101751.10	0.76
			RPL17P45	ENSG00000267664.1	0.81	RP11-113I24.1	ENSG00000230987.2	0.81				ASS1P1	ENSG00000220517.2	0.73	HSPA8P6	ENSG00000235864.1	0.80	CCDC151	ENSG00000198003.11	0.83	SLC22A10	ENSG00000184999.11	0.74							ANKRD10-IT1	ENSG00000229152.2	0.76
			HNF4GP1	ENSG00000228611.2	0.81	ASPSCR1	ENSG00000169696.15	0.81				DTHD1	ENSG00000197057.8	0.73	OR12D3	ENSG00000112462.8	0.80	CTD-2619J13.9	ENSG00000268049.1	0.82	HSD17B13	ENSG00000170509.11	0.74							RP11-465N4.5	ENSG00000273478.1	0.76
			RFC5P1	ENSG00000233526.1	0.81	LINC01481	ENSG00000257815.5	0.81				WBSCR28	ENSG00000175877.3	0.72	RP11-84O12.2	ENSG00000213421.4	0.80	FAM69B	ENSG00000165716.9	0.82	CFHR2	ENSG00000080910.11	0.73							EEA1	ENSG00000102189.16	0.76
			UBTFL9	ENSG00000254567.2	0.81	HIGD1AP11	ENSG00000227644.2	0.81				FAM122C	ENSG00000156500.14	0.72	AC092646.2	ENSG00000227738.1	0.80	PHF21B	ENSG00000056487.15	0.82	SMLR1	ENSG00000256162.2	0.73							ANKRD36B	ENSG00000196912.12	0.76
			RP11-48B3.2	ENSG00000253760.1	0.81	PPOX	ENSG00000143224.17	0.81				GMNC	ENSG00000205835.8	0.72	OR5H14	ENSG00000236032.2	0.80	CHGB	ENSG00000089199.9	0.82	A1BG	ENSG00000121410.11	0.73							RP11-250B2.3	ENSG00000233967.6	0.76
			RP11-10F11.3	ENSG00000277174.1	0.81	GCSAML	ENSG00000169224.12	0.81				SPAG17	ENSG00000155761.13	0.72	AC011525.2	ENSG00000261400.1	0.80	SAPCD1-AS1	ENSG00000235663.1	0.82	HGFAC	ENSG00000109758.8	0.73							GLIPR1L1	ENSG00000173401.9	0.76
			RP11-313C15.1	ENSG00000253726.1	0.80	ABCB6	ENSG00000115657.12	0.80				RP11-1042B17.3	ENSG00000258670.1	0.72	CTD-2544L4.1	ENSG00000253107.1	0.80	CTD-2265O21.3	ENSG00000267424.1	0.82	PRODH2	ENSG00000250799.9	0.73							CCDC84	ENSG00000186166.8	0.76
			AC111200.2	ENSG00000213605.2	0.80	KPTN	ENSG00000118162.13	0.80				CCDC67	ENSG00000165325.13	0.72	ACTR3BP3	ENSG00000260327.2	0.80	KLHL41	ENSG00000239474.6	0.82	C3P1	ENSG00000167798.16	0.73							RP11-332H14.2	ENSG00000272994.1	0.76
			SPATA31D5P	ENSG00000240632.6	0.80	RP11-725P16.2	ENSG00000272769.1	0.80				ANKEF1	ENSG00000132623.15	0.71	RP13-221M14.2	ENSG00000233336.1	0.80	RP11-89H19.2	ENSG00000278385.1	0.82	UPB1	ENSG00000100024.14	0.73							RP11-298I3.3	ENSG00000280129.1	0.76
			AC000367.1	ENSG00000224981.1	0.80	SUCLA2-AS1	ENSG00000227848.1	0.80				RN7SKP36	ENSG00000200867.1	0.71	IFNA14	ENSG00000228083.2	0.80	ABHD15	ENSG00000168792.4	0.82	RTP3	ENSG00000163825.3	0.73							INE1	ENSG00000224975.1	0.76
			RPL7P20	ENSG00000254252.1	0.80	LINC01338	ENSG00000281327.1	0.80				LINC01413	ENSG00000260172.1	0.71	MTND5P9	ENSG00000248748.1	0.80	TBC1D29	ENSG00000266733.5	0.82	TTR	ENSG00000118271.9	0.73							PTOV1-AS2	ENSG00000269352.1	0.76
			RP11-536C10.4	ENSG00000257959.1	0.80	CH17-437K3.1	ENSG00000227082.1	0.80				SERTAD4	ENSG00000082497.11	0.71	RP11-63B13.1	ENSG00000261501.1	0.80	VWA7	ENSG00000204396.10	0.82	APOA1	ENSG00000118137.9	0.73							HECTD2	ENSG00000165338.16	0.76
			HSPD1P8	ENSG00000215357.2	0.80	HHLA3	ENSG00000197568.13	0.80				CCDC108	ENSG00000181378.13	0.71	OR1L1	ENSG00000173679.2	0.80	DLG4	ENSG00000132535.18	0.82	C19orf80	ENSG00000130173.13	0.73							CTD-2026K11.6	ENSG00000203392.3	0.76
			RPL31P35	ENSG00000232612.1	0.80	PODN	ENSG00000174348.13	0.80				EGOT	ENSG00000235947.1	0.71	RP11-5O23.1	ENSG00000259413.2	0.80	LINC01091	ENSG00000249464.5	0.82	HPR	ENSG00000261701.6	0.73							AC005253.2	ENSG00000268030.1	0.76
			RP1-155D22.2	ENSG00000260422.1	0.80	MAP7D2	ENSG00000184368.15	0.80				DYDC1	ENSG00000170788.13	0.71	RP11-157E21.3	ENSG00000277576.1	0.80	RP11-758H9.2	ENSG00000273702.1	0.82	RP11-156K13.2	ENSG00000253215.1	0.73							RRN3P1	ENSG00000248124.7	0.76
			RP5-1116H23.5	ENSG00000276768.1	0.80	RP6-91H8.2	ENSG00000259907.1	0.80				RP11-477H21.2	ENSG00000269887.1	0.70	RP11-475D12.2	ENSG00000224504.2	0.80	ATP1A3	ENSG00000105409.15	0.82	AMBP	ENSG00000106927.11	0.73							SENP6	ENSG00000112701.17	0.76
			HMGB3P19	ENSG00000217085.2	0.80	RP11-81K2.1	ENSG00000262039.1	0.80				AC011239.1	ENSG00000224361.1	0.70	OR51F3P	ENSG00000272559.1	0.80	EDA	ENSG00000158813.17	0.82	SLC10A1	ENSG00000100652.4	0.73							DPP9-AS1	ENSG00000205790.1	0.76
			AC005392.13	ENSG00000227606.2	0.80	RP11-395A13.2	ENSG00000272667.1	0.80				DNAH6	ENSG00000115423.18	0.70	RP11-2O17.2	ENSG00000248529.5	0.80	KCNB1	ENSG00000158445.7	0.81	DIO1	ENSG00000211452.10	0.73							AC006277.3	ENSG00000279452.1	0.76
			RN7SL547P	ENSG00000240584.3	0.80	RP13-1032I1.7	ENSG00000262049.1	0.80				FAM74A1	ENSG00000215112.6	0.70	VN1R33P	ENSG00000227426.1	0.80	LPPR2	ENSG00000105520.10	0.81	AC004862.6	ENSG00000232667.9	0.73							AP000648.5	ENSG00000280385.1	0.76
			RN7SL675P	ENSG00000239580.3	0.80	MLLT11	ENSG00000213190.3	0.80				RP5-898J17.1	ENSG00000231987.1	0.70	RP11-447M4.1	ENSG00000260670.1	0.80	ADGRF3	ENSG00000173567.14	0.81	RP1-232P20.1	ENSG00000269985.1	0.73							LL0XNC01-7P3.1	ENSG00000270012.1	0.76
			RP11-944L7.6	ENSG00000277509.1	0.80	RP11-503I22.2	ENSG00000249820.1	0.80				AC009495.2	ENSG00000235192.1	0.70	AC000374.1	ENSG00000227249.1	0.80	RP11-489E7.1	ENSG00000253604.1	0.81	RP5-849H19.3	ENSG00000278967.1	0.73							UBE2Q2P1	ENSG00000189136.8	0.76
			RP11-593P24.2	ENSG00000253504.1	0.80	RP11-334A14.8	ENSG00000235563.1	0.80				PROKR1	ENSG00000169618.6	0.70	OR5AK1P	ENSG00000255083.1	0.80	GPR135	ENSG00000181619.11	0.81	G6PC	ENSG00000131482.9	0.73							RP11-43N16.4	ENSG00000279861.1	0.76
			RGPD4-AS1	ENSG00000230651.7	0.80	ODF2L	ENSG00000122417.15	0.80				RRM2P3	ENSG00000214018.3	0.70	RP11-112L7.1	ENSG00000260786.1	0.80	FAM174A	ENSG00000174132.8	0.81	SERPINA3	ENSG00000273259.2	0.73							RP11-600F24.7	ENSG00000260285.1	0.76
			RP11-586L23.1	ENSG00000248747.1	0.80	RP11-554J4.1	ENSG00000272606.1	0.80				CCDC30	ENSG00000186409.14	0.70	RP11-163O19.11	ENSG00000255550.1	0.80	CPLX2	ENSG00000145920.14	0.81	UROC1	ENSG00000159650.8	0.73							KCNQ1OT1	ENSG00000269821.1	0.76
			RP11-379I19.1	ENSG00000253260.1	0.80	LINC01470	ENSG00000249484.8	0.80				MMRN1	ENSG00000138722.9	0.70	LINC00208	ENSG00000170983.3	0.80	DIRAS1	ENSG00000176490.4	0.81	SLC22A9	ENSG00000149742.9	0.73							LLNLR-246C6.1	ENSG00000273218.1	0.76
			KB-1930G5.3	ENSG00000253644.1	0.80	GAS1	ENSG00000180447.6	0.80				CLNK	ENSG00000109684.14	0.70	RP11-93L14.1	ENSG00000226448.1	0.80	CTD-2619J13.19	ENSG00000269473.1	0.81	LINC01370	ENSG00000237767.1	0.73							RP5-1142A6.9	ENSG00000260121.1	0.76
			RP11-1074O12.1	ENSG00000259100.1	0.80	GTF2IRD1	ENSG00000006704.10	0.80				LINC01177	ENSG00000261397.1	0.70	CDY18P	ENSG00000232205.1	0.80	TAT-AS1	ENSG00000260886.1	0.81	APOC3	ENSG00000110245.11	0.73							RP11-504P24.8	ENSG00000272645.2	0.76
			RP11-431D12.1	ENSG00000253839.1	0.80	RP11-460I13.6	ENSG00000238231.2	0.80				CFAP47	ENSG00000165164.12	0.70	GPR53P	ENSG00000229281.1	0.80	ZNF491	ENSG00000177599.12	0.81	LECT2	ENSG00000145826.8	0.73							LINC00342	ENSG00000232931.5	0.76
			LINC01455	ENSG00000250888.1	0.80	CAHM	ENSG00000270419.1	0.80				DLGAP2-AS1	ENSG00000253267.5	0.70	RP11-562F9.2	ENSG00000249152.1	0.80	KLF2P2	ENSG00000230646.1	0.81	PGLYRP2	ENSG00000161031.12	0.73							ZSCAN30	ENSG00000186814.12	0.76
			ARL6IP1P1	ENSG00000255664.1	0.80	RP11-1O2.1	ENSG00000263547.1	0.80							ME2P1	ENSG00000230097.2	0.80	CYB5D1	ENSG00000182224.11	0.81	MBL2	ENSG00000165471.6	0.73							ZNF83	ENSG00000167766.18	0.76
			TTLL7-IT1	ENSG00000233061.1	0.80	RP11-440G5.2	ENSG00000233081.1	0.80							RP11-638L3.2	ENSG00000265240.1	0.80	AC006942.4	ENSG00000269194.1	0.81	SLCO1B1	ENSG00000134538.2	0.73							ARID4A	ENSG00000032219.18	0.76
			RP5-1181K21.4	ENSG00000279960.1	0.80	LYPD8	ENSG00000259823.5	0.80							LL22NC03-27C5.1	ENSG00000278890.1	0.80	SYT5	ENSG00000129990.14	0.81	APOC2	ENSG00000234906.8	0.73							LINC01355	ENSG00000261326.2	0.76
			BICD1P1	ENSG00000224346.1	0.80	AQP10	ENSG00000143595.12	0.79							RP11-361D14.2	ENSG00000261129.1	0.80	GS1-259H13.11	ENSG00000272647.1	0.81	ITIH2	ENSG00000151655.17	0.73							ZNF37BP	ENSG00000234420.7	0.76
			RN7SKP47	ENSG00000202217.1	0.80	ZACN	ENSG00000186919.12	0.79							RP11-270L13.1	ENSG00000224560.3	0.80	ZNF483	ENSG00000173258.12	0.81	GDF2	ENSG00000263761.2	0.73							RAD51-AS1	ENSG00000245849.6	0.76
			RP11-475A13.2	ENSG00000259395.1	0.80	RP11-157F20.3	ENSG00000272202.1	0.79							OR4A7P	ENSG00000255349.1	0.80	CNIH2	ENSG00000174871.10	0.81	FMO3	ENSG00000007933.12	0.73							RP1-266L20.9	ENSG00000266896.1	0.76
			SPATA31D2P	ENSG00000237770.2	0.80	RP11-666G4.1	ENSG00000229031.1	0.79							RP11-313I2.11	ENSG00000254971.1	0.80	RP11-650K20.3	ENSG00000257327.1	0.81	VTN	ENSG00000109072.13	0.73							ZNF700	ENSG00000196757.7	0.76
			RP11-527H14.1	ENSG00000263821.1	0.80	RP4-680D5.2	ENSG00000237301.1	0.79							RN7SL822P	ENSG00000239545.3	0.80	OTOGL	ENSG00000165899.10	0.80	CPB2	ENSG00000080618.13	0.73							CEP152	ENSG00000103995.13	0.75
			AC013470.8	ENSG00000224667.1	0.80	RP1-265C24.8	ENSG00000261839.1	0.79							RPL35AP33	ENSG00000241334.2	0.80	MAGEE1	ENSG00000198934.4	0.80	CYP2C9	ENSG00000138109.9	0.73							RP13-638C3.5	ENSG00000279613.1	0.75
			AC008155.1	ENSG00000213237.4	0.80	RP13-131K19.6	ENSG00000272434.1	0.79							RP11-719C20.1	ENSG00000259507.1	0.80	GRM1	ENSG00000152822.13	0.80	CYP2E1	ENSG00000130649.9	0.73							WASH5P	ENSG00000282458.1	0.75
			RP4-749H3.2	ENSG00000226487.1	0.80	RP4-758J18.2	ENSG00000224870.6	0.79							RN7SL492P	ENSG00000240545.3	0.80	TCEAL5	ENSG00000204065.2	0.80	SLC22A7	ENSG00000137204.14	0.73							FAM178A	ENSG00000119906.11	0.75
			RP11-462G12.4	ENSG00000263159.1	0.80	TMUB2	ENSG00000168591.15	0.79							OR1S1	ENSG00000280204.1	0.80	IRX2	ENSG00000170561.12	0.80	CFHR1	ENSG00000244414.6	0.73							RP11-303E16.9	ENSG00000278985.1	0.75

## Sheet: LINC01254
BLCA Tumor			BRCA Tumor			CHOL Tumor			ESCA Tumor			GBM Tumor			KICH Tumor			KIRP Tumor			LGG Tumor			LIHC Tumor			MESO Tumor			PAAD Tumor			PCPG Tumor			READ Tumor			STAD Tumor			TGCT Tumor			THYM Tumor			UCEC Tumor
KCNQ1DN	ENSG00000237941.2	0.78	RP11-219H23.2	ENSG00000273634.1	0.91	MTND4P32	ENSG00000226056.1	1.00	IGHV3-64	ENSG00000223648.3	0.94	MIR219A2	ENSG00000207955.3	0.88	C19orf57	ENSG00000132016.11	0.92	FMO8P	ENSG00000238087.3	0.78	CTSV	ENSG00000136943.10	0.75	AP000233.3	ENSG00000223870.1	0.85	LHCGR	ENSG00000138039.14	0.83	AC007277.3	ENSG00000213981.8	0.84	GS1-124K5.8	ENSG00000244657.1	0.71	CT45A10	ENSG00000269586.7	0.92	DNAH9	ENSG00000007174.17	0.92	U82695.5	ENSG00000214897.4	0.81	RP11-385H1.1	ENSG00000280118.1	0.81	MGAM	ENSG00000257335.8
DEFA5	ENSG00000164816.7	0.77	PPIAP27	ENSG00000234363.1	0.91	OR7E37P	ENSG00000215480.4	0.99	CTB-167G5.6	ENSG00000268864.4	0.91	PACRG-AS1	ENSG00000281692.1	0.87	E2F2	ENSG00000007968.6	0.91	SPINK1	ENSG00000164266.10	0.72	MPZ	ENSG00000158887.15	0.74	RP11-680N20.1	ENSG00000263450.1	0.85	RP11-66B24.4	ENSG00000259583.2	0.79	FTHL17	ENSG00000132446.6	0.84	SNORA70	ENSG00000206909.1	0.71	UBE2DNL	ENSG00000229547.4	0.92	RP11-787P24.2	ENSG00000254564.1	0.92	AC074389.5	ENSG00000231476.1	0.81	RP11-240A16.1	ENSG00000251329.1	0.79	SLC16A14P1	ENSG00000213708.6
RN7SKP103	ENSG00000200718.1	0.77	RP11-846F4.14	ENSG00000275480.1	0.91	Metazoa_SRP	ENSG00000277510.1	0.99	MTND4P10	ENSG00000226663.2	0.91	RP5-1039K5.19	ENSG00000279010.1	0.87	OSTM1-AS1	ENSG00000225174.1	0.90	LY6D	ENSG00000167656.4	0.72	ATP2A1	ENSG00000196296.13	0.71	SYCP1	ENSG00000198765.11	0.85	GUCY2C	ENSG00000070019.4	0.77	ST8SIA6-AS1	ENSG00000204832.9	0.83	MIR5195	ENSG00000265929.1	0.71	XAGE5	ENSG00000171405.12	0.91	IL10	ENSG00000136634.5	0.92	VCX3B	ENSG00000205642.9	0.81	ZG16B	ENSG00000162078.11	0.79	RP1-128O3.5	ENSG00000233511.1
TSPY23P	ENSG00000229159.1	0.77	SUMO2P18	ENSG00000253639.1	0.91	KRT31	ENSG00000094796.4	0.97	RP11-439C8.2	ENSG00000243953.1	0.91	SOX10	ENSG00000100146.16	0.86	RP11-388M20.6	ENSG00000260304.1	0.90	FMO9P	ENSG00000215834.8	0.72	HCCAT5	ENSG00000260880.2	0.70	RP11-348M17.2	ENSG00000253403.1	0.84	RP11-445P17.6	ENSG00000228291.1	0.76	RP11-254F7.1	ENSG00000260476.1	0.83	AP000233.3	ENSG00000223870.1	0.71	GAGE2A	ENSG00000189064.8	0.91	AC097713.3	ENSG00000228162.1	0.92	CTAG1B	ENSG00000184033.12	0.81	CFHR3	ENSG00000116785.13	0.79	RP3-463P15.1	ENSG00000231143.1
GRPEL2P3	ENSG00000230682.1	0.77	NCR2	ENSG00000096264.13	0.91	IQCJ-SCHIP1-AS1	ENSG00000241211.1	0.97	AC020571.3	ENSG00000229056.2	0.91	RP4-555D20.2	ENSG00000261786.1	0.84	RPL31P60	ENSG00000239988.1	0.89	H19	ENSG00000130600.15	0.72	AC005042.4	ENSG00000204380.4	0.70	RP11-527L4.9	ENSG00000267166.5	0.84	ALDH1A3	ENSG00000184254.16	0.76	RNU1-58P	ENSG00000199283.1	0.82	RPS12P24	ENSG00000230283.1	0.71	SSX4	ENSG00000268009.5	0.91	MTHFD2P1	ENSG00000244681.1	0.92	RP11-408E5.4	ENSG00000121388.5	0.81	VEGFC	ENSG00000150630.3	0.79	RP11-292E2.4	ENSG00000243012.1
SULT1C2P2	ENSG00000261209.1	0.77	RP11-419L20.2	ENSG00000254185.1	0.90	RP11-571M6.15	ENSG00000257921.5	0.94	MTND3P8	ENSG00000232714.1	0.91	GAL3ST1	ENSG00000128242.12	0.84	RP4-669K10.8	ENSG00000279443.1	0.89	RP4-601P9.2	ENSG00000257817.1	0.71	KRT79	ENSG00000185640.5	0.70	PRPF19P1	ENSG00000264685.1	0.83	RBFOX1	ENSG00000078328.19	0.75	Metazoa_SRP	ENSG00000277635.1	0.82	RP11-804H8.7	ENSG00000280382.1	0.71	ZBTB46-AS1	ENSG00000231208.4	0.91	AC004947.2	ENSG00000233760.1	0.92	VCX3A	ENSG00000169059.12	0.81	MRGPRX4	ENSG00000179817.4	0.78	AC006548.26	ENSG00000270226.1
KB-1582A10.2	ENSG00000253233.1	0.77	RP11-1109M24.12	ENSG00000264562.1	0.89	RPS27P23	ENSG00000239413.1	0.94	CTD-3022G6.1	ENSG00000269877.1	0.91	RP11-168O16.1	ENSG00000229191.1	0.84	RIBC2	ENSG00000128408.8	0.89	MYT1	ENSG00000196132.11	0.71	MLANA	ENSG00000120215.9	0.70	RP11-340F16.1	ENSG00000272177.1	0.80	C7orf34	ENSG00000165131.6	0.75	ZIC4	ENSG00000174963.17	0.79	RP11-293P20.2	ENSG00000225315.2	0.71	SSX4B	ENSG00000269791.5	0.91	FBXO15	ENSG00000141665.11	0.91	RP11-669N7.2	ENSG00000249196.6	0.81	FOLR1	ENSG00000110195.11	0.76	MIR452	ENSG00000207753.2
USP9YP28	ENSG00000224151.1	0.77	LINC01257	ENSG00000204603.6	0.85	RP11-3B12.2	ENSG00000237764.2	0.93	MTND5P19	ENSG00000231199.2	0.91	ATP6V0A4	ENSG00000105929.15	0.81	FBXO43	ENSG00000156509.13	0.89	AC090954.5	ENSG00000228874.1	0.71	KRT8P1	ENSG00000258948.2	0.70	OR9K1P	ENSG00000196534.4	0.80	FAM90A9P	ENSG00000235825.3	0.73	SPDYC	ENSG00000204710.2	0.78	IGHV7-27	ENSG00000254326.1	0.71	RP11-94B19.7	ENSG00000265717.1	0.91	PLRG1	ENSG00000171566.11	0.91	MAGEA1	ENSG00000198681.6	0.81	LINC01096	ENSG00000246095.2	0.76	AC092662.6	ENSG00000229935.1
LINC00279	ENSG00000232348.2	0.77	SLC29A4P1	ENSG00000214668.4	0.84	CYCSP40	ENSG00000262870.1	0.92	AC008753.4	ENSG00000269564.1	0.91	SIRT2	ENSG00000068903.19	0.81	WDR76	ENSG00000092470.11	0.89	RP11-285E9.6	ENSG00000263718.2	0.70	AP000619.6	ENSG00000256035.1	0.70	CETN1	ENSG00000177143.4	0.80	SLC6A21P	ENSG00000269009.1	0.73	RP11-190J1.3	ENSG00000224817.1	0.77	AL591704.5	ENSG00000237008.2	0.71	PAGE1	ENSG00000068985.4	0.90	AE000661.37	ENSG00000251002.7	0.91	RP11-288D15.1	ENSG00000234813.1	0.80	RP11-857B24.5	ENSG00000258949.1	0.76	RP5-1132H15.1	ENSG00000234185.2
Metazoa_SRP	ENSG00000277168.1	0.77	MTND5P6	ENSG00000228440.1	0.83	RP11-778D9.4	ENSG00000228205.1	0.92	RP4-534P7.2	ENSG00000238236.1	0.91	C7orf65	ENSG00000221845.4	0.80	ASF1B	ENSG00000105011.8	0.89	DQX1	ENSG00000144045.13	0.70	RP11-25I15.2	ENSG00000257164.5	0.70	HOMER2P2	ENSG00000238275.2	0.80	CTD-3057O21.1	ENSG00000260443.1	0.72	CTC-338M12.9	ENSG00000248103.1	0.77	RP11-541G9.2	ENSG00000257920.1	0.71	RP13-266I11.1	ENSG00000271400.1	0.89	LHFPL1	ENSG00000182508.13	0.90	AP000351.13	ENSG00000235689.1	0.80	TGM2	ENSG00000198959.11	0.76	AC003973.5	ENSG00000269199.1
RP11-438P9.2	ENSG00000227350.1	0.77	LINC00381	ENSG00000226240.1	0.83	RP11-588G21.1	ENSG00000279551.1	0.92	SNORA11	ENSG00000261709.3	0.91	LIMS2	ENSG00000072163.18	0.80	RP5-902P8.10	ENSG00000230415.1	0.89	RP11-108K3.2	ENSG00000259306.2	0.70	IGHV3OR16-6	ENSG00000270864.1	0.70	CROCCP1	ENSG00000225769.1	0.79	SNORA27	ENSG00000201807.1	0.72	FGF4	ENSG00000075388.3	0.77	RP11-264K23.1	ENSG00000243574.1	0.71	CT45A5	ENSG00000228836.8	0.89	AY269186.2	ENSG00000224918.1	0.89	ATP6V1G1P7	ENSG00000230474.1	0.80	RP13-46H24.1	ENSG00000254739.1	0.76	RP11-166N6.2	ENSG00000243273.1
RP11-341G23.3	ENSG00000257766.1	0.77	MTND4P4	ENSG00000225295.1	0.82	LINC01219	ENSG00000232987.1	0.92	RN7SKP31	ENSG00000252163.1	0.91	RP4-555D20.1	ENSG00000280435.1	0.79	CDKN3	ENSG00000100526.19	0.88	RP11-789C1.2	ENSG00000251061.2	0.70				AC093326.3	ENSG00000233633.1	0.79	Metazoa_SRP	ENSG00000281834.1	0.72	FOXR2	ENSG00000189299.6	0.77	AC091199.1	ENSG00000275173.1	0.71	TEX13A	ENSG00000268629.6	0.89	CACNA1S	ENSG00000081248.10	0.89	RP11-541G7.4	ENSG00000277516.1	0.80	MAPK6PS2	ENSG00000223488.2	0.76	OR2L9P	ENSG00000237492.1
RP11-370K11.1	ENSG00000232184.1	0.77	KCNK18	ENSG00000186795.1	0.82	HS3ST5	ENSG00000249853.7	0.90	RP11-2G1.1	ENSG00000258751.1	0.91	WASF1	ENSG00000112290.12	0.78	TMSB15B	ENSG00000158427.14	0.88							RPL23AP77	ENSG00000267301.1	0.79	Y_RNA	ENSG00000276696.1	0.72	XAGE2	ENSG00000155622.6	0.77	RP3-445O10.1	ENSG00000235089.1	0.71	GAGE12J	ENSG00000224659.2	0.89	RP11-114M1.2	ENSG00000236385.1	0.89	GPN3P1	ENSG00000227465.1	0.80	PAQR5	ENSG00000137819.13	0.75	RP11-621H8.1	ENSG00000259208.2
AC091962.3	ENSG00000251183.1	0.77	RPL3P10	ENSG00000243095.1	0.80	IL19	ENSG00000142224.15	0.90	FAM27E4	ENSG00000204805.8	0.91	SLC1A1	ENSG00000106688.11	0.77	OIP5	ENSG00000104147.8	0.88							KRTAP19-5	ENSG00000186977.2	0.79	AC139143.2	ENSG00000230080.2	0.72	AP001425.14	ENSG00000270835.2	0.77	CTA-31J9.2	ENSG00000227723.1	0.71	RP11-180C1.1	ENSG00000250038.5	0.89	MUCL1	ENSG00000172551.10	0.88	RP11-629E24.2	ENSG00000266505.1	0.80	RP11-346D19.1	ENSG00000236347.1	0.75	HIST1H2APS1	ENSG00000216436.2
MIR30C2	ENSG00000199094.2	0.77	DMRT1	ENSG00000137090.11	0.80	RGCC	ENSG00000102760.12	0.90	MTND6P14	ENSG00000235638.1	0.91	ERBB3	ENSG00000065361.14	0.77	CENPI	ENSG00000102384.13	0.88							RPS4XP20	ENSG00000249987.1	0.79	AC007274.5	ENSG00000236690.2	0.72	SSX1	ENSG00000126752.7	0.77	IGKV2-4	ENSG00000253435.1	0.71	TGIF2LX	ENSG00000153779.9	0.89	C9orf84	ENSG00000165181.16	0.88	CTD-2358C21.3	ENSG00000260568.1	0.80	LINC01430	ENSG00000237907.1	0.75	RP11-340F16.1	ENSG00000272177.1
DEFA6	ENSG00000164822.4	0.77	AC226119.4	ENSG00000271977.1	0.78	NFE2	ENSG00000123405.13	0.90	CPA2	ENSG00000158516.11	0.91	GPR17	ENSG00000144230.16	0.76	ACYP1	ENSG00000119640.8	0.87							RP11-65E22.2	ENSG00000240890.2	0.79	MESTIT1_1	ENSG00000277269.1	0.72	CISD1P1	ENSG00000213403.2	0.77	PRSS3P1	ENSG00000250591.3	0.71	RP11-459O1.2	ENSG00000234426.1	0.89	MYO3B	ENSG00000071909.18	0.88	RP11-533K9.3	ENSG00000224245.1	0.80	RP11-352D13.6	ENSG00000261634.3	0.75	RP11-5K23.5	ENSG00000224515.1
RP11-143E21.2	ENSG00000279193.1	0.76	AC002429.5	ENSG00000236197.2	0.78	RPS3	ENSG00000149273.14	0.90	PLA2G2E	ENSG00000188784.4	0.90	ATP13A5-AS1	ENSG00000236508.1	0.76	DHDH	ENSG00000104808.7	0.87							NRBF2P2	ENSG00000226933.1	0.78	TMPRSS11GP	ENSG00000229009.7	0.72	RP11-962G15.1	ENSG00000253363.5	0.77	RP5-884C9.3	ENSG00000223589.2	0.71	RP11-775L16.1	ENSG00000230936.1	0.89	EGR2	ENSG00000122877.13	0.87	RPSAP64	ENSG00000227721.1	0.80	GCM2	ENSG00000124827.6	0.74	MAB21L2	ENSG00000181541.5
B3GNT6	ENSG00000198488.10	0.76	RP11-798K23.1	ENSG00000250674.1	0.77	FZD10	ENSG00000111432.4	0.90	IGDCC3	ENSG00000174498.13	0.90	RAB33A	ENSG00000134594.4	0.75	ARHGEF39	ENSG00000137135.17	0.87							GCNT1P2	ENSG00000249206.2	0.78	RP11-144A16.6	ENSG00000275628.1	0.72	RP11-665E10.1	ENSG00000255022.1	0.77	AC024937.1	ENSG00000278820.1	0.71	GS1-309P15.2	ENSG00000224960.3	0.89	AC017074.3	ENSG00000265429.2	0.86	OR2AL1P	ENSG00000254767.1	0.80	SNORA12	ENSG00000212342.1	0.73	RP5-988G15.1	ENSG00000216917.2
CA6	ENSG00000131686.14	0.75	RN7SL774P	ENSG00000263882.2	0.77	PLA2G2C	ENSG00000187980.6	0.90	CALCR	ENSG00000004948.13	0.90	RP11-1055B8.3	ENSG00000262223.6	0.75	CDC7	ENSG00000097046.12	0.87							IQCF1	ENSG00000173389.15	0.78	KARSP1	ENSG00000229696.1	0.72	RP11-498E11.2	ENSG00000249351.2	0.77	RP11-10B2.1	ENSG00000230916.2	0.70	FAM47B	ENSG00000189132.6	0.89	SLC4A8	ENSG00000050438.16	0.86	SIGLEC21P	ENSG00000269253.1	0.80	TAS2R31	ENSG00000256436.1	0.73	XAGE3	ENSG00000171402.14
KCNQ1-AS1	ENSG00000229414.2	0.75	LINC00501	ENSG00000203645.2	0.77	ROPN1L	ENSG00000145491.11	0.89	RP11-478H13.1	ENSG00000236716.1	0.90	UGT8	ENSG00000174607.10	0.75	RP11-307C12.11	ENSG00000232093.1	0.87							CCDC105	ENSG00000160994.3	0.78	GS1-122H1.1	ENSG00000232309.1	0.72	RNU2-64P	ENSG00000223247.1	0.77				MAGEA1	ENSG00000198681.6	0.88	RNA5SP197	ENSG00000200227.1	0.85	AGGF1P5	ENSG00000260680.1	0.80	SCPEP1	ENSG00000121064.12	0.73	RP11-476C8.2	ENSG00000248196.1
RP1-140J1.4	ENSG00000230779.1	0.74	RP11-1217F2.15	ENSG00000234089.1	0.74	IRX1	ENSG00000170549.3	0.89	RP11-293G6__B.4	ENSG00000231582.2	0.90	C2orf27A	ENSG00000197927.12	0.75	FANCI	ENSG00000140525.17	0.86							GAGE2E	ENSG00000275113.1	0.78	HSFY4P	ENSG00000224482.1	0.72	RP13-57D9.3	ENSG00000228160.1	0.77				PAGE2	ENSG00000234068.6	0.88	TRPM3	ENSG00000083067.22	0.85	CCDC58P2	ENSG00000236944.1	0.80	CGA	ENSG00000135346.8	0.73	HNF4A-AS1	ENSG00000229005.2
LINC00676	ENSG00000234854.1	0.74	RP11-811I15.1	ENSG00000250020.1	0.74	ACTG1P2	ENSG00000229129.1	0.89	RP11-468N14.09	ENSG00000198277.6	0.90	ATCAY	ENSG00000167654.17	0.74	OR7H1P	ENSG00000226480.1	0.86							RP3-474G15.1	ENSG00000181514.6	0.78	MTCYBP2	ENSG00000217179.1	0.72	LINC00383	ENSG00000237534.1	0.77				DCAF4L2	ENSG00000176566.4	0.88	CD226	ENSG00000150637.8	0.84	RP11-269C4.1	ENSG00000240201.1	0.80	SMIM10L2B	ENSG00000196972.7	0.73	GDPD4	ENSG00000178795.9
FABP2	ENSG00000145384.3	0.73	RP11-158D2.2	ENSG00000227463.2	0.74	ACTG1P11	ENSG00000229465.1	0.89	RP11-451G4.3	ENSG00000242790.1	0.90	HRASLS	ENSG00000127252.5	0.74	CDCA8	ENSG00000134690.10	0.86							OR8S1	ENSG00000197376.2	0.77	CTC-539A10.7	ENSG00000271010.1	0.72	RP11-90C4.3	ENSG00000233079.1	0.77				GPR1-AS	ENSG00000279220.1	0.88	AC098617.1	ENSG00000233766.7	0.84	RP4-560B9.5	ENSG00000232261.1	0.80	RP11-616L12.4	ENSG00000257350.1	0.73	EEF1DP5	ENSG00000213130.3
KB-1582A10.1	ENSG00000253332.1	0.73	MIR663AHG	ENSG00000227195.8	0.71	RP11-401P9.6	ENSG00000205414.1	0.89	AC015933.2	ENSG00000227279.1	0.90	HMGA1P7	ENSG00000216753.3	0.73	NDC80	ENSG00000080986.12	0.86							SLC25A6P1	ENSG00000233015.1	0.77	SUMO2P14	ENSG00000271096.1	0.72	RP5-1016A21.1	ENSG00000276627.1	0.77				RP11-58B2.1	ENSG00000249017.1	0.88	CTLA4	ENSG00000163599.14	0.84	KRTAP9-1	ENSG00000240542.3	0.80	LINC01202	ENSG00000280776.1	0.73	FTLP14	ENSG00000260459.2
C9orf57	ENSG00000204669.9	0.72	AC008281.1	ENSG00000228909.1	0.71	LINC01513	ENSG00000246016.2	0.89	RP11-625L16.1	ENSG00000255745.1	0.89	LINC01447	ENSG00000236078.1	0.73	CLSPN	ENSG00000092853.13	0.86							PRR20C	ENSG00000229665.8	0.75	RP11-361A21.3	ENSG00000270423.1	0.72	RP11-114N19.5	ENSG00000271656.1	0.77				AC113167.2	ENSG00000249265.1	0.88	RP11-246E12.2	ENSG00000278891.1	0.82	TPMTP3	ENSG00000232562.1	0.80	PROSER2-AS1	ENSG00000225778.5	0.72	LINC01428	ENSG00000228888.1
SNORA31	ENSG00000252920.1	0.71				FGF3	ENSG00000186895.2	0.89	FAM110B	ENSG00000169122.11	0.89	ACAN	ENSG00000157766.15	0.72	FOXD2-AS1	ENSG00000237424.1	0.86							CXorf67	ENSG00000187690.3	0.75	RP11-109M19.4	ENSG00000263241.1	0.72	PRAMEF26	ENSG00000280267.3	0.77				RP11-667M19.1	ENSG00000243353.1	0.88	PRSS56	ENSG00000237412.6	0.82	RP11-536C10.17	ENSG00000257672.2	0.80	PACRG-AS1	ENSG00000281692.1	0.72	VN1R7P	ENSG00000275592.1
CLCA1	ENSG00000016490.15	0.71				ANKRD62P1	ENSG00000259271.1	0.89	TUBB8P11	ENSG00000234711.1	0.88	C1orf106	ENSG00000163362.10	0.72	E2F1	ENSG00000101412.12	0.86							LINC00454	ENSG00000226921.6	0.75	RP11-101E5.6	ENSG00000277412.1	0.72	AC103563.3	ENSG00000232594.1	0.77				BNIP3P34	ENSG00000269509.1	0.88	STRA6	ENSG00000137868.18	0.82	RN7SL356P	ENSG00000266553.2	0.80	CTC-508F8.1	ENSG00000263331.1	0.72	RP11-85G20.2	ENSG00000241499.1
RP4-536B24.2	ENSG00000260466.1	0.71				STARD13-IT1	ENSG00000230300.1	0.89	TNP1	ENSG00000118245.2	0.88	CA10	ENSG00000154975.13	0.72	PRC1	ENSG00000198901.13	0.86							BIRC8	ENSG00000163098.4	0.74	OR4A47	ENSG00000237388.2	0.72	RP11-56P9.4	ENSG00000255527.1	0.77				RP11-145M4.1	ENSG00000241042.1	0.88	IL17RD	ENSG00000144730.16	0.82	C10orf32-ASMT	ENSG00000270316.1	0.80	RP11-308N19.3	ENSG00000237062.1	0.72	GAPDHP60	ENSG00000248180.1
NLGN1-AS1	ENSG00000228213.5	0.71				SCGB1C1	ENSG00000188076.2	0.89	NAALAD2	ENSG00000077616.10	0.88	BCAS1	ENSG00000064787.12	0.72	LINC00858	ENSG00000229404.5	0.85							KLK15	ENSG00000174562.13	0.74	OR8B8	ENSG00000197125.2	0.72	U8	ENSG00000206987.1	0.77				RP11-220H4.2	ENSG00000225244.3	0.88	OSBPL6	ENSG00000079156.16	0.82	TUBB4BP4	ENSG00000254961.1	0.80	OR9R1P	ENSG00000224622.1	0.72	RP5-1195D24.1	ENSG00000236985.1
EDDM3B	ENSG00000181552.3	0.70				LY6G6E	ENSG00000255552.7	0.89	AMBN	ENSG00000178522.14	0.88	ELFN2	ENSG00000166897.14	0.71	CCDC175	ENSG00000151838.11	0.85							LINC01047	ENSG00000232225.6	0.74	RPL27P12	ENSG00000239215.1	0.72	AC069294.1	ENSG00000221487.1	0.77				CTC-261N6.1	ENSG00000248363.5	0.88	SCRT2	ENSG00000215397.3	0.80	LINC01029	ENSG00000265843.2	0.80	FRG2B	ENSG00000225899.7	0.71	APCDD1L	ENSG00000198768.10
						AC096775.2	ENSG00000237551.1	0.89	TMSB10P2	ENSG00000235211.4	0.87	RP11-89N17.4	ENSG00000236494.1	0.71	MANEAL	ENSG00000185090.14	0.85							PABPC1P2	ENSG00000198526.7	0.74	RP13-650G11.1	ENSG00000235926.1	0.72	Y_RNA	ENSG00000202078.1	0.77				RP11-244B22.7	ENSG00000260590.1	0.88	AC092013.1	ENSG00000227785.1	0.80	MAGEA9B	ENSG00000267978.5	0.80	CTD-2224J9.8	ENSG00000213777.5	0.71	ENPP7P8	ENSG00000255319.5
						CTD-3118D11.2	ENSG00000253675.1	0.89	RP11-141J13.5	ENSG00000261863.1	0.87	SLC44A1	ENSG00000070214.15	0.71	EMC3-AS1	ENSG00000180385.8	0.85							CNN2P8	ENSG00000213355.3	0.74	COX6B1P6	ENSG00000253349.1	0.72	uc_338	ENSG00000275001.1	0.77				LINC00395	ENSG00000231061.1	0.88	RP11-90K6.1	ENSG00000239482.6	0.79	VCX2	ENSG00000177504.10	0.80	B3GNT7	ENSG00000156966.6	0.71	SSTR1	ENSG00000139874.5
						RP11-108N13.1	ENSG00000218476.2	0.89	RN7SKP98	ENSG00000252879.1	0.87	TUBB4A	ENSG00000104833.10	0.71	RP5-971N18.3	ENSG00000229766.6	0.85							NF1P7	ENSG00000278143.1	0.74	RP11-419C19.3	ENSG00000251112.2	0.72	RP11-589B3.7	ENSG00000271985.1	0.77				RP11-216P16.5	ENSG00000279001.1	0.88	KRTAP19-2	ENSG00000186965.4	0.78	VCX	ENSG00000182583.12	0.80	IQCA1-AS1	ENSG00000232893.1	0.71	AC006548.28	ENSG00000280156.1
						SNCA-AS1	ENSG00000247775.2	0.89	RP11-648L3.1	ENSG00000242595.1	0.87				SKP2	ENSG00000145604.15	0.85							RP11-101E5.2	ENSG00000276149.1	0.74	LINC01375	ENSG00000226159.1	0.72	MIR1-2	ENSG00000278753.1	0.77				AC087499.10	ENSG00000227685.1	0.88	CASC15	ENSG00000272168.5	0.78	CST5	ENSG00000170367.4	0.80	TMEM174	ENSG00000164325.7	0.71	CCDC166	ENSG00000255181.3
						CDY9P	ENSG00000232899.1	0.89	RP11-293G6__B.2	ENSG00000235761.2	0.87				CCDC14	ENSG00000175455.14	0.85							APOOP2	ENSG00000240902.1	0.74	SLC29A4P1	ENSG00000214668.4	0.72	RP11-109M17.2	ENSG00000270372.1	0.77				AC012075.2	ENSG00000235519.1	0.88	OR7E28P	ENSG00000251491.2	0.77	LINC01432	ENSG00000234435.2	0.80	OR56A3	ENSG00000184478.6	0.71	HIST1H2AA	ENSG00000164508.4
						LINC01509	ENSG00000226825.1	0.89	AC010880.1	ENSG00000224400.5	0.87				CENPK	ENSG00000123219.12	0.85							PRR20B	ENSG00000204918.3	0.74	OR51B6	ENSG00000176239.7	0.72	CXCL1P	ENSG00000250339.2	0.77				RCC2P5	ENSG00000241018.1	0.88	RASGRF1	ENSG00000058335.15	0.77	CT55	ENSG00000169551.12	0.80	LINC01524	ENSG00000234948.1	0.71	uc_338	ENSG00000273621.1
						LINC01210	ENSG00000239513.5	0.89	CLDN19	ENSG00000164007.10	0.87				AC009005.2	ENSG00000267751.5	0.85							PRR20A	ENSG00000204919.1	0.74	RP11-424M21.1	ENSG00000249184.1	0.72	MT4	ENSG00000102891.3	0.77				RP11-26L20.4	ENSG00000263207.2	0.88	TCF7	ENSG00000081059.19	0.76	NHP2P1	ENSG00000105988.6	0.80	CTB-187M2.2	ENSG00000265126.1	0.70	RP11-692C24.2	ENSG00000258765.1
						RP11-120E13.1	ENSG00000226134.1	0.89	RP11-521M14.1	ENSG00000253888.1	0.87				SEPT5	ENSG00000184702.17	0.85							PRR20D	ENSG00000227151.4	0.74	COX6CP10	ENSG00000238008.1	0.72	AC103563.2	ENSG00000231331.1	0.77				RP11-14K3.4	ENSG00000261046.1	0.88	RP11-244M2.1	ENSG00000267374.1	0.75	LINC00864	ENSG00000264404.2	0.79	FZD7	ENSG00000155760.2	0.70	C10orf142	ENSG00000277288.3
						RP1-149M18.4	ENSG00000280371.1	0.89	FAM151A	ENSG00000162391.11	0.86				TCF19	ENSG00000137310.11	0.85							PRR20E	ENSG00000234278.3	0.74	RN7SL283P	ENSG00000240977.3	0.72	RP11-576N17.4	ENSG00000251647.2	0.77				CTB-78F1.1	ENSG00000254187.1	0.88	RERE	ENSG00000142599.17	0.75	RP11-733D4.1	ENSG00000234580.1	0.79	LECT1	ENSG00000136110.12	0.70	GAB4	ENSG00000215568.7
						RP11-1O7.1	ENSG00000231735.1	0.89	RP11-497G19.1	ENSG00000257883.1	0.86				MFI2-AS1	ENSG00000228109.1	0.85							KRT18P2	ENSG00000234439.1	0.74	RP1-305G21.1	ENSG00000255207.1	0.72	RP11-749H20.2	ENSG00000279475.1	0.77				NF1P6	ENSG00000224435.2	0.88	AC093585.6	ENSG00000229996.1	0.74	MTX1P1	ENSG00000236675.1	0.78	NCOR1P3	ENSG00000233601.1	0.70	RP11-761N21.1	ENSG00000231873.1
						PPP1R12BP2	ENSG00000205936.3	0.89	PAGE4	ENSG00000101951.16	0.86				CSTF3-AS1	ENSG00000247151.6	0.85							LINC00606	ENSG00000226567.1	0.74	RP11-1029M24.4	ENSG00000270285.1	0.72	Y_RNA	ENSG00000200953.1	0.77				RP11-95P9.1	ENSG00000236580.1	0.88	KITLG	ENSG00000049130.13	0.74	AF277315.13	ENSG00000226141.1	0.78	RP5-1039K5.19	ENSG00000279010.1	0.70	SERPINH1P1	ENSG00000229207.1
						RBMY2JP	ENSG00000227204.1	0.89	FAM35DP	ENSG00000189014.7	0.86				PRR23A	ENSG00000206260.3	0.85							RP11-563N12.2	ENSG00000253164.5	0.74	AC012497.2	ENSG00000228374.1	0.72	SSU72P1	ENSG00000226547.2	0.77				RP11-275A14.1	ENSG00000277646.1	0.88	DKK4	ENSG00000104371.4	0.73	LINC01287	ENSG00000234722.3	0.78	TAS2R13	ENSG00000212128.2	0.70	RP11-64J4.2	ENSG00000262670.5
						TNP1	ENSG00000118245.2	0.89	FAM35BP	ENSG00000165874.12	0.86				SGOL1	ENSG00000129810.14	0.84							XXbac-BPG27H4.8	ENSG00000237923.1	0.74	RP11-1149M3.2	ENSG00000253176.3	0.72	RP11-386B13.3	ENSG00000250754.5	0.77				RP11-673F18.1	ENSG00000254563.1	0.88	HPS4	ENSG00000100099.20	0.73	LCN15	ENSG00000177984.6	0.78	FLJ31662	ENSG00000233907.1	0.70	RP11-20J15.3	ENSG00000229116.2
						SNORA17	ENSG00000281808.1	0.89	RP11-267C16.2	ENSG00000266003.1	0.85				PAGE4	ENSG00000101951.16	0.84							RP11-671C19.2	ENSG00000264334.1	0.74	OR8B3	ENSG00000196661.3	0.72	AKR1B1P8	ENSG00000231371.1	0.77				RP1-138O17.1	ENSG00000280223.1	0.88	DBH-AS1	ENSG00000225756.1	0.73	TRPM2-AS	ENSG00000230061.2	0.78	ZYG11AP1	ENSG00000232242.2	0.70	RP11-248C1.3	ENSG00000270670.1
						HMGN2P31	ENSG00000214195.4	0.89	CPA5	ENSG00000158525.15	0.85				KIF18B	ENSG00000186185.13	0.84							RP11-876F14.1	ENSG00000254511.1	0.73	RP11-458F8.1	ENSG00000232546.1	0.72	RP11-497K15.1	ENSG00000228373.2	0.77				RP11-501H19.2	ENSG00000229731.1	0.88	SPRY4	ENSG00000187678.8	0.72	LINC00864	ENSG00000228055.2	0.77	UQCRFS1P2	ENSG00000223721.3	0.70	CCT5P1	ENSG00000250444.1
						RP11-676B18.2	ENSG00000274549.1	0.89	GAPDHP37	ENSG00000231907.2	0.84				SCNN1D	ENSG00000162572.19	0.84							CRH	ENSG00000147571.4	0.73	RP11-266E6.3	ENSG00000271901.1	0.72	RP4-570O12.2	ENSG00000220131.1	0.77				AP005273.1	ENSG00000232500.1	0.88	FGF20	ENSG00000078579.8	0.72	MAGEA10	ENSG00000124260.11	0.77				HHIPL1	ENSG00000182218.9
						RP11-5A1.1	ENSG00000279034.1	0.89	LINC00837	ENSG00000235824.4	0.84				RP11-267M23.6	ENSG00000253175.1	0.84							AC073143.1	ENSG00000228585.1	0.73	RP11-713P17.5	ENSG00000255406.1	0.72	SRSF1P1	ENSG00000224640.1	0.77				RP11-529J17.1	ENSG00000265639.1	0.88	ALG1L9P	ENSG00000254978.2	0.72	RP11-343J3.2	ENSG00000236154.1	0.77				RP11-527L4.5	ENSG00000282199.1
						AC092669.6	ENSG00000225815.2	0.89	SNORA43	ENSG00000281863.1	0.84				RP4-539M6.22	ENSG00000273428.3	0.84							RP11-472F21.1	ENSG00000274970.1	0.73	KEL	ENSG00000197993.7	0.72	MTND1P20	ENSG00000226794.1	0.77				AGGF1P8	ENSG00000261752.1	0.88	RP4-536B24.2	ENSG00000260466.1	0.72	RP11-175I6.5	ENSG00000233424.2	0.77				RP11-379F12.4	ENSG00000232638.1
						RPL5P7	ENSG00000234415.1	0.89	RP11-761N21.1	ENSG00000231873.1	0.84				CCNE2	ENSG00000175305.16	0.84							Metazoa_SRP	ENSG00000277385.1	0.73	OR7E26P	ENSG00000228547.5	0.72	RPS24P7	ENSG00000227361.1	0.77				RP11-722M1.1	ENSG00000248215.5	0.88	AC007405.6	ENSG00000239467.5	0.71	CTD-3064C13.1	ENSG00000255372.1	0.77				FRMD1	ENSG00000153303.16
						RP11-489M13.1	ENSG00000243894.1	0.89	RP11-267C16.1	ENSG00000227115.6	0.84				FAM111B	ENSG00000189057.10	0.84							KCNK18	ENSG00000186795.1	0.73	FSHR	ENSG00000170820.11	0.72	OR5B3	ENSG00000172769.2	0.77				RP13-347D8.7	ENSG00000277535.1	0.88	RP3-354N19.3	ENSG00000216316.1	0.71	RP11-736I10.1	ENSG00000255393.1	0.77				RP4-792G4.3	ENSG00000236674.1
						U3	ENSG00000212422.2	0.89	GCM1	ENSG00000137270.10	0.84				IL20RB-AS1	ENSG00000249407.1	0.84							SCARNA16	ENSG00000252404.1	0.73	RP11-210M15.1	ENSG00000258010.3	0.72	MICF	ENSG00000233265.1	0.77				CT47A8	ENSG00000230347.4	0.88	C11orf39	ENSG00000224795.1	0.70	AC002401.1	ENSG00000236472.1	0.76				AC003973.4	ENSG00000269504.1
						RP1-272E8.1	ENSG00000225066.1	0.89	RP11-511B23.1	ENSG00000257345.2	0.83				RP11-244M2.1	ENSG00000267374.1	0.84							CTD-2308B18.2	ENSG00000250438.1	0.73	POTEB	ENSG00000233917.8	0.71	RP11-95P13.2	ENSG00000238232.1	0.77				MTND2P18	ENSG00000234939.1	0.88	SPRY4-IT1	ENSG00000281881.1	0.70	RP11-397O4.1	ENSG00000229206.3	0.76				PPP1R2P4	ENSG00000241353.3
						CYLC2	ENSG00000155833.14	0.89	SCARNA20	ENSG00000252778.1	0.83				NUSAP1	ENSG00000137804.12	0.84							LINC01217	ENSG00000251219.1	0.73	CTNNA2	ENSG00000066032.18	0.71	RP11-149P14.1	ENSG00000224338.2	0.77				RP11-787B4.2	ENSG00000228707.1	0.88	DBH	ENSG00000123454.10	0.70	CTD-2593A12.4	ENSG00000231228.4	0.76
						UGT1A11P	ENSG00000227846.1	0.89	HSD3B1	ENSG00000203857.9	0.83				CCNB2	ENSG00000157456.7	0.84							CH17-53B9.4	ENSG00000274748.1	0.73	CH507-9B2.2	ENSG00000279493.1	0.70	RP4-583K8.1	ENSG00000225785.1	0.77				AC009263.2	ENSG00000234639.1	0.88	CTB-174D11.1	ENSG00000248222.5	0.70	RP11-329E24.6	ENSG00000231937.1	0.76
						RP11-497D6.5	ENSG00000272397.1	0.89	ERVH48-1	ENSG00000233056.2	0.82				SMC1B	ENSG00000077935.16	0.84							RP11-265D19.8	ENSG00000273988.1	0.73	PPP1R1AP2	ENSG00000261084.1	0.70	RP4-529N6.2	ENSG00000260673.1	0.77				RP11-60E8.2	ENSG00000271018.1	0.88	PHLDA1	ENSG00000139289.13	0.70	ZNF812	ENSG00000224689.7	0.75
						CTD-2561F5.1	ENSG00000258497.1	0.89	CTD-2215E18.1	ENSG00000251513.2	0.82				GINS1	ENSG00000101003.9	0.84							CRIP1P4	ENSG00000182351.7	0.73	RP11-785F11.1	ENSG00000250341.1	0.70	AC009487.4	ENSG00000224076.5	0.77				SIAH1P1	ENSG00000230227.4	0.88	RP11-166B2.9	ENSG00000277458.1	0.70	RP11-295P9.8	ENSG00000268549.1	0.75
						AP000432.3	ENSG00000279648.1	0.89	AF064858.10	ENSG00000237609.1	0.82				TMEM210	ENSG00000185863.7	0.83							RP11-749H20.1	ENSG00000256922.1	0.73				RP11-379H8.1	ENSG00000278013.1	0.77				PIN1P1	ENSG00000229359.2	0.88	RP11-958N24.4	ENSG00000277920.1	0.70	UCP1	ENSG00000109424.3	0.75
						RP11-537A6.9	ENSG00000233144.1	0.89	AC125238.3	ENSG00000233031.1	0.81				RP11-161D15.1	ENSG00000250708.1	0.83							IFNL4P1	ENSG00000272311.1	0.73				SSX8	ENSG00000157965.11	0.77				AC087499.7	ENSG00000236504.2	0.88	RP11-680G24.7	ENSG00000273804.1	0.70	RP11-281P23.1	ENSG00000251152.1	0.74
						FERD3L	ENSG00000146618.3	0.89	RP11-293G6__B.8	ENSG00000270710.1	0.81				KIF2C	ENSG00000142945.12	0.83							CTC-228N24.2	ENSG00000250603.1	0.73				RP5-1022J11.2	ENSG00000232465.1	0.77				RP11-340F16.1	ENSG00000272177.1	0.88				UGT1A3	ENSG00000243135.5	0.74
						KRTAP10-10	ENSG00000221859.2	0.89	RP1-153P14.8	ENSG00000204110.6	0.81				RN7SL491P	ENSG00000264400.2	0.83							C18orf12	ENSG00000280197.1	0.73				RP11-31H15.2	ENSG00000214071.4	0.77				OR51F4P	ENSG00000273051.1	0.88				RP11-69M1.1	ENSG00000240739.1	0.74
						CDRT7	ENSG00000259944.1	0.89	RP11-419J16.1	ENSG00000265554.1	0.81				EZH2	ENSG00000106462.10	0.83							RP13-16D10.1	ENSG00000280142.1	0.73				MAGEB1	ENSG00000214107.7	0.77				E2F6P3	ENSG00000226885.1	0.88				AJ239322.1	ENSG00000235615.2	0.74
						RP11-56H16.1	ENSG00000256070.1	0.89	AC108059.2	ENSG00000232101.1	0.81				PHF19	ENSG00000119403.13	0.83							CTD-2312P21.1	ENSG00000240627.1	0.73				PPBP	ENSG00000163736.3	0.77				OR56A1	ENSG00000180934.5	0.88				PPP1R2P6	ENSG00000241661.1	0.74
						RP11-395M19.1	ENSG00000244470.2	0.89	MCHR1	ENSG00000128285.4	0.81				RP4-669H2.1	ENSG00000231703.2	0.83							RP11-30P16.1	ENSG00000279503.1	0.73				MAGEC2	ENSG00000046774.9	0.77				LINC01205	ENSG00000228980.3	0.88				RP11-354I10.1	ENSG00000225775.1	0.74
						LDHAL6CP	ENSG00000250517.2	0.89	SMTNL2	ENSG00000188176.11	0.80				KIF4A	ENSG00000090889.11	0.83							RP11-500K19.1	ENSG00000243593.1	0.73				MAGEA2	ENSG00000268606.5	0.77				HMGN1P11	ENSG00000248336.1	0.88				FAF2P1	ENSG00000228759.1	0.74
						OR4F5	ENSG00000186092.4	0.89	RP11-781P6.1	ENSG00000265069.1	0.80				RP11-449D8.1	ENSG00000265485.5	0.83							PLCH1-AS2	ENSG00000242925.1	0.73				LINC01598	ENSG00000231934.1	0.77				GTF2IP6	ENSG00000266736.1	0.88				OR8K4P	ENSG00000254947.1	0.73
						RP11-639F1.3	ENSG00000242152.1	0.89	RP11-1112C15.2	ENSG00000253523.1	0.80				WFDC21P	ENSG00000261040.6	0.83							HNRNPDLP3	ENSG00000236185.1	0.73				PRR9	ENSG00000203783.4	0.77				CTD-2140G10.2	ENSG00000254768.5	0.88				PGAM2	ENSG00000164708.5	0.73
						RN7SKP114	ENSG00000222259.1	0.89	AL158151.1	ENSG00000220992.1	0.80				RP11-573D15.2	ENSG00000232233.1	0.83							TRIM51EP	ENSG00000237706.4	0.73				MAGEA10	ENSG00000124260.11	0.77				RP11-402K9.1	ENSG00000236988.2	0.88				CRB3P1	ENSG00000232563.1	0.73
						PRPF19P1	ENSG00000264685.1	0.89	RP11-345F18.1	ENSG00000250821.1	0.79				RPS23P1	ENSG00000243504.1	0.83							RP11-172F10.1	ENSG00000266268.5	0.73				TUBA3C	ENSG00000198033.11	0.77				AC005616.1	ENSG00000266893.1	0.88				RP11-226P1.1	ENSG00000241891.1	0.73
						AC003986.5	ENSG00000229533.1	0.89	DGKK	ENSG00000274588.1	0.78				LINC01413	ENSG00000260172.1	0.83							LINC00350	ENSG00000225316.1	0.73				RP11-408E5.4	ENSG00000121388.5	0.77				VN1R71P	ENSG00000264837.1	0.88				NUTF2P4	ENSG00000234790.1	0.73
						CTB-3M24.3	ENSG00000250409.1	0.89	GATM-AS1	ENSG00000275672.1	0.77				ARHGAP33	ENSG00000004777.18	0.83							EIF4A3P1	ENSG00000266181.1	0.73				TBX4	ENSG00000121075.9	0.77				RP11-263F14.3	ENSG00000232355.2	0.88				CTAG1A	ENSG00000268651.2	0.73
						CDY5P	ENSG00000226449.1	0.89	GPX5	ENSG00000224586.6	0.77				RP11-551L14.4	ENSG00000226472.7	0.83							RN7SL470P	ENSG00000263669.2	0.73				MAGEA4	ENSG00000147381.11	0.77				HMGN1P6	ENSG00000224070.1	0.88				RP11-231P20.2	ENSG00000236155.6	0.73
						RPL7P56	ENSG00000231164.1	0.89	IGLV3-1	ENSG00000211673.2	0.76				RP1-209B9.2	ENSG00000277315.1	0.83							RN7SKP199	ENSG00000222257.1	0.73				RP11-78L16.1	ENSG00000278630.1	0.77				RP11-760D2.13	ENSG00000278205.1	0.88				PHF2P2	ENSG00000226057.6	0.73
						NARSP2	ENSG00000253789.1	0.89	RP11-506E9.3	ENSG00000261745.2	0.76				DERL3	ENSG00000099958.14	0.83							CXCL1P	ENSG00000250339.2	0.73				SSX3	ENSG00000165584.15	0.77				RP11-791N19.1	ENSG00000279682.1	0.88				RP1-14D6.7	ENSG00000231447.1	0.73
						OR2AT2P	ENSG00000234611.1	0.89	ACSS3	ENSG00000111058.7	0.76				C8orf74	ENSG00000171060.10	0.82							RPS15AP25	ENSG00000236191.3	0.73				STRA8	ENSG00000146857.3	0.77				RP11-344A5.1	ENSG00000225299.1	0.88				CSAG1	ENSG00000198930.12	0.73
						FAM8A6P	ENSG00000218772.2	0.89	RN7SKP222	ENSG00000222583.1	0.76				DEPDC1	ENSG00000024526.16	0.82							RN7SKP134	ENSG00000200830.1	0.73				DPPA2	ENSG00000163530.4	0.77				VN1R9P	ENSG00000276400.1	0.88				APOA5	ENSG00000110243.11	0.72
						SNRPEP8	ENSG00000231399.1	0.89	CTB-167G5.7	ENSG00000274892.1	0.75				POC1A	ENSG00000164087.7	0.82							RP5-837G17.1	ENSG00000275923.1	0.73				SSX2B	ENSG00000268447.5	0.77				CTC-503J8.8	ENSG00000280394.1	0.88				RP11-79E3.3	ENSG00000250954.5	0.72
						PHBP1	ENSG00000213091.2	0.89	RP11-497G19.2	ENSG00000257654.1	0.75				MCM2	ENSG00000073111.13	0.82							AF096876.1	ENSG00000259981.1	0.73				RP11-308B16.2	ENSG00000248783.1	0.77				RP11-373A6.1	ENSG00000230276.2	0.88				CCK	ENSG00000187094.11	0.72
						RP1-272E8.2	ENSG00000276467.1	0.89	TBX3	ENSG00000135111.14	0.75				KC6	ENSG00000267313.6	0.82							RPL32P28	ENSG00000232105.1	0.73				KRTAP3-1	ENSG00000212901.3	0.77				RP11-432M8.12	ENSG00000249666.1	0.88				CST4	ENSG00000101441.4	0.72
						AC098826.5	ENSG00000227745.1	0.89	LRP2	ENSG00000081479.12	0.74				RP1L1	ENSG00000183638.5	0.82							SBF1P1	ENSG00000248522.1	0.73				KLF2P1	ENSG00000231240.1	0.77				Metazoa_SRP	ENSG00000278640.1	0.88				RP1-230L10.1	ENSG00000235538.1	0.72
						RP11-3B12.3	ENSG00000219445.2	0.89	DPPA3	ENSG00000187569.2	0.74				BUB1B	ENSG00000156970.12	0.82							RP11-720N19.2	ENSG00000265801.1	0.73				TGM6	ENSG00000166948.9	0.76				RP11-67H24.1	ENSG00000261719.1	0.88				KRT12	ENSG00000187242.4	0.72
						RP3-333B15.5	ENSG00000273838.1	0.89	NDST4	ENSG00000138653.9	0.74				SCML2P1	ENSG00000264127.1	0.82							RP11-69C17.4	ENSG00000231326.6	0.73				CSAG3	ENSG00000268916.5	0.76				AC114813.1	ENSG00000226813.2	0.88				PRSS38	ENSG00000185888.5	0.72
						RP11-365D9.1	ENSG00000227236.2	0.89	SSC4D	ENSG00000146700.8	0.74				PRDM9	ENSG00000164256.9	0.82							CHCHD3P1	ENSG00000236420.1	0.73				MKRN4P	ENSG00000238222.3	0.76				RP11-113D6.3	ENSG00000254857.1	0.88				RPL5P8	ENSG00000213917.2	0.72
						RP1-8B22.2	ENSG00000225478.2	0.89	ZNRF3-IT1	ENSG00000235786.1	0.74				SKA1	ENSG00000154839.9	0.82							FAM108A8P	ENSG00000260864.1	0.73				SPRR2B	ENSG00000196805.7	0.76				RP11-628E19.2	ENSG00000254357.1	0.88				RP11-401O9.3	ENSG00000264067.1	0.72
						AC087430.1	ENSG00000235158.1	0.89	RP4-601P9.2	ENSG00000257817.1	0.73				RP11-396O20.1	ENSG00000254695.1	0.82							CTD-2010I22.2	ENSG00000248391.5	0.73				RP13-16H11.2	ENSG00000227932.1	0.76				CTD-2090I13.3	ENSG00000242757.1	0.88				XX-CR54.1	ENSG00000229703.4	0.72
						LINC01351	ENSG00000237457.6	0.89	CTB-134H23.2	ENSG00000196796.5	0.73				LMNB1	ENSG00000113368.11	0.82							RP11-10J21.6	ENSG00000254291.1	0.73				RP11-807H22.5	ENSG00000256518.2	0.76				LINC00559	ENSG00000261446.2	0.88				RP11-816J8.1	ENSG00000258868.1	0.71
						RPS6P12	ENSG00000233309.1	0.89	RP11-38L15.8	ENSG00000272430.1	0.73				AP1S2P1	ENSG00000226046.1	0.82							HOXB13-AS1_1	ENSG00000273750.1	0.73				RP11-366F6.2	ENSG00000229967.1	0.76				RP11-846F4.11	ENSG00000264970.1	0.88				RP11-671C19.2	ENSG00000264334.1	0.71
						RP11-87O11.1	ENSG00000224493.1	0.89	ZNRF3-AS1	ENSG00000177993.3	0.72				AC004911.2	ENSG00000226592.1	0.81							MTND3P2	ENSG00000230052.1	0.73				TCEB2P2	ENSG00000255262.3	0.76				RP11-810K23.6	ENSG00000259025.1	0.88				RAB28P1	ENSG00000226108.2	0.71
						RP11-185O21.1	ENSG00000260255.1	0.89	RP11-2G1.2	ENSG00000258750.2	0.72				OR11J5P	ENSG00000258494.1	0.81							FKBP4P2	ENSG00000269692.1	0.73				HBE1	ENSG00000213931.5	0.76				RP11-344N17.12	ENSG00000231603.1	0.88				GS1-256O22.5	ENSG00000227303.1	0.71
						RN7SKP38	ENSG00000222714.1	0.89	RP11-136I14.5	ENSG00000255689.1	0.72				LYZL4	ENSG00000157093.8	0.81							RP11-34N19.1	ENSG00000255357.1	0.73				SLC5A8	ENSG00000256870.2	0.76				RP11-242F24.1	ENSG00000228750.5	0.88				CPB2	ENSG00000080618.13	0.71
						REXO1L12P	ENSG00000276006.1	0.89	WNT6	ENSG00000115596.3	0.72				CTD-2383I20.1	ENSG00000249994.1	0.81							RP11-24H2.3	ENSG00000279325.1	0.73				SPRR2G	ENSG00000159516.8	0.76				FAM8A2P	ENSG00000254722.1	0.88				RP11-333B11.1	ENSG00000281160.1	0.71
						OFD1P2Y	ENSG00000226611.2	0.89	RP11-651K21.1	ENSG00000271624.1	0.72				RP11-399F4.1	ENSG00000278720.1	0.81							TRBV5-2	ENSG00000242771.1	0.73				HOXC12	ENSG00000123407.3	0.76				OR7E18P	ENSG00000180926.6	0.88				MAGEA12	ENSG00000213401.8	0.70
						GJE1	ENSG00000203733.5	0.89	CTC-280C13.1	ENSG00000253261.1	0.71				SNORA70G	ENSG00000206650.1	0.81							PRR20FP	ENSG00000271140.1	0.73				RP11-297C4.2	ENSG00000261346.1	0.75				WIZP1	ENSG00000255293.1	0.88				RP11-69C17.2	ENSG00000226694.2	0.70
						RP11-113D6.9	ENSG00000254546.1	0.89	NFE2	ENSG00000123405.13	0.71				XXbac-BPGBPG24O18.1	ENSG00000270935.1	0.81							AP000459.7	ENSG00000227716.1	0.73				CALM2P1	ENSG00000267170.1	0.75				RP11-339A11.2	ENSG00000260322.1	0.88				CTA-268H5.9	ENSG00000213752.3	0.70
						RP11-316M21.9	ENSG00000270623.1	0.89	RP11-476J6.1	ENSG00000259117.1	0.71				SETP2	ENSG00000258893.1	0.81							RP11-548M13.1	ENSG00000260937.5	0.73				MAGEA3	ENSG00000221867.8	0.75				RN7SKP169	ENSG00000223056.1	0.88				RP5-1106E3.1	ENSG00000213296.4	0.70
						RP13-81N3.2	ENSG00000256888.5	0.89	RP11-401P9.6	ENSG00000205414.1	0.71				MRPS36P2	ENSG00000249539.1	0.81							CTD-2161F6.1	ENSG00000248467.1	0.73				RP11-473M10.3	ENSG00000237378.2	0.75				RP11-1360M22.2	ENSG00000259769.1	0.88				SLC45A2	ENSG00000164175.14	0.70
						CTB-174D11.3	ENSG00000279752.1	0.89	APELA	ENSG00000248329.5	0.70				UBTFL3	ENSG00000204699.4	0.81							MRGPRG	ENSG00000182170.3	0.73				LOR	ENSG00000203782.5	0.75				RP11-955H22.2	ENSG00000256502.1	0.88				CTD-2140G10.2	ENSG00000254768.5	0.70
						SALL4P7	ENSG00000258692.2	0.89	TRPM3	ENSG00000083067.22	0.70				RP11-179H18.5	ENSG00000227437.1	0.81							RPS21P8	ENSG00000223782.1	0.73				SLC9A3P2	ENSG00000238125.1	0.75				LINC01518	ENSG00000233515.1	0.88				CTAG2	ENSG00000126890.13	0.70
						RN7SL376P	ENSG00000265814.2	0.89	OLIG3	ENSG00000177468.6	0.70				RP11-354I10.1	ENSG00000225775.1	0.81							RP11-439H13.2	ENSG00000256199.1	0.73				AC003958.2	ENSG00000234859.5	0.75				RP11-150D5.2	ENSG00000260983.1	0.88
						IGKV1OR2-118	ENSG00000270999.1	0.89	Metazoa_SRP	ENSG00000255851.2	0.70				ALG1L8P	ENSG00000227620.4	0.81							RP11-56P9.10	ENSG00000254728.1	0.73				LCE2B	ENSG00000159455.8	0.75				RP11-244B22.6	ENSG00000261398.1	0.88
						IFNA8	ENSG00000120242.3	0.89	AC023128.1	ENSG00000234940.1	0.70				RP11-275A14.1	ENSG00000277646.1	0.81							RP11-747H12.1	ENSG00000197468.5	0.73				HIST1H4F	ENSG00000274618.1	0.75				RP1-200K18.1	ENSG00000224893.5	0.88
[truncated: 4 more columns]

## Sheet: LINC01255
BLCA Tumor			BRCA Tumor			ESCA Tumor			LGG Tumor			LUSC Tumor			LUAD Tumor			MESO Tumor			OV Tumor			PRAD Tumor			READ Tumor			SARC Tumor			SKCM Tumor			STAD Tumor			TGCT Tumor			THCA Tumor			UCEC Tumor
RP11-637O11.2	ENSG00000241882.1	0.86	CTC-320C6.1	ENSG00000273569.1	0.95	AC005019.2	ENSG00000213875.3	0.99	AC092601.1	ENSG00000225182.1	1.00	RP11-233E12.4	ENSG00000233449.1	0.83	RP5-988G17.1	ENSG00000224711.1	1.00	AC003973.4	ENSG00000269504.1	1.00	VN1R66P	ENSG00000237185.1	0.85	RP11-662I13.1	ENSG00000213736.2	0.81	RP11-144G6.13	ENSG00000270369.1	1.00	OR5BN2P	ENSG00000255140.1	0.89	SNORA70	ENSG00000206637.1	0.74	OR13C9	ENSG00000136839.1	0.93	RP11-322N21.2	ENSG00000250719.1	1.00	RNA5SP449	ENSG00000252680.1	0.70	RP11-321M21.1	ENSG00000266774.1	0.98
PHKBP2	ENSG00000258467.1	0.86	RP11-366M4.15	ENSG00000250430.1	0.95	RP11-324J13.3	ENSG00000277096.1	0.99	RP11-278L15.4	ENSG00000239408.1	1.00	OR5AK2	ENSG00000181273.2	0.83	RP11-542E6.3	ENSG00000225482.1	1.00	VN1R70P	ENSG00000261515.1	1.00	OR5D2P	ENSG00000254457.1	0.81	AC113608.1	ENSG00000237326.1	0.81	RP11-275H4.1	ENSG00000241231.1	1.00	RP11-252C24.2	ENSG00000233724.1	0.89	CTC-457E21.7	ENSG00000268589.1	0.74	RP11-447M12.3	ENSG00000279935.1	0.93	ACTL9	ENSG00000181786.4	1.00	CTC-431G16.3	ENSG00000238254.3	0.70	RNU6ATAC3P	ENSG00000210709.1	0.88
RP11-140I16.2	ENSG00000254216.1	0.83	SLC7A15P	ENSG00000232800.1	0.95	DUX4L31	ENSG00000231411.1	0.99	RP11-80H8.3	ENSG00000243733.1	1.00	RP11-768G7.3	ENSG00000242816.1	0.82	RP11-381I15.1	ENSG00000253407.1	1.00	RP11-119H12.1	ENSG00000241002.1	1.00	MTATP6P7	ENSG00000232990.2	0.78	RP11-15D14.2	ENSG00000255401.1	0.81	RP11-424D14.1	ENSG00000223883.1	1.00	RP11-93K22.7	ENSG00000249869.1	0.88	RP11-529E15.1	ENSG00000272027.2	0.74	RP11-384G23.1	ENSG00000273919.1	0.92	BPIFA3	ENSG00000131059.11	1.00	GS1-21A4.2	ENSG00000270385.1	0.70	AC096664.1	ENSG00000234488.1	0.88
AC034228.2	ENSG00000231585.1	0.82	AC093074.1	ENSG00000267238.1	0.95	RP4-591L5.2	ENSG00000231949.1	0.99	RP11-693I21.1	ENSG00000270753.1	1.00	KRT128P	ENSG00000258120.1	0.81	AC000370.2	ENSG00000241921.1	1.00	OR52M1	ENSG00000197790.1	1.00	RP11-381K7.1	ENSG00000227851.1	0.78	IGHV3-60	ENSG00000253742.1	0.81	TDGF1P4	ENSG00000217566.2	1.00	CTD-3023L14.1	ENSG00000253774.1	0.88	RNA5SP123	ENSG00000200114.1	0.74	OR10J1	ENSG00000196184.8	0.91	CCDC70	ENSG00000123171.6	1.00	CSPG4P1Y	ENSG00000240450.1	0.70	NTF6G	ENSG00000267099.1	0.88
RP11-323K10.1	ENSG00000223869.1	0.82	RP11-279L11.1	ENSG00000253162.1	0.95	RP11-22M7.2	ENSG00000233620.5	0.99	USP17L19	ENSG00000248920.2	1.00	RP11-175I6.5	ENSG00000233424.2	0.81	RNU1-115P	ENSG00000202199.1	1.00	KRTAP9-6	ENSG00000212659.1	1.00	RN7SKP123	ENSG00000222664.1	0.78	AC068137.6	ENSG00000230496.1	0.81	RP11-296L22.8	ENSG00000230729.1	1.00	Metazoa_SRP	ENSG00000280533.1	0.88	RP11-421H10.2	ENSG00000270718.1	0.74	FDPSP6	ENSG00000233676.2	0.91	LINC01350	ENSG00000228309.6	1.00	RP11-111F5.1	ENSG00000236450.1	0.70	SCARNA16	ENSG00000252404.1	0.88
RNU6-1307P	ENSG00000212314.2	0.82	RP11-577N1.1	ENSG00000254050.1	0.95	RP11-27G13.4	ENSG00000250398.1	0.99	RPS20P20	ENSG00000241942.2	1.00	SPACA7	ENSG00000153498.11	0.80	RP11-573E11.2	ENSG00000254983.1	1.00	RP11-354H21.1	ENSG00000244461.1	1.00	OR5W2	ENSG00000187612.1	0.78	RP11-462L8.1	ENSG00000229656.6	0.77	RP11-524K14.1	ENSG00000229600.1	1.00	OR4C2P	ENSG00000182565.8	0.85	AK6P2	ENSG00000257173.1	0.74	LINC00700	ENSG00000234962.5	0.91	DNAJB8	ENSG00000179407.3	1.00	RFC3P1	ENSG00000236158.1	0.70	HMGB1P48	ENSG00000234379.1	0.88
SNORD35B	ENSG00000200530.1	0.82	TAAR2	ENSG00000146378.6	0.94	LL22NC03-86D4.1	ENSG00000236052.1	0.99	RP11-44I10.6	ENSG00000261802.1	1.00	SNORA40	ENSG00000273499.1	0.78	AC009237.14	ENSG00000236026.1	1.00	RP11-6C14.1	ENSG00000250488.1	1.00	OR51F3P	ENSG00000272559.1	0.78	VN2R3P	ENSG00000234680.1	0.75	RP11-315L6.1	ENSG00000259403.1	1.00	AP000472.3	ENSG00000227075.1	0.83	OR10V2P	ENSG00000255538.1	0.71	MTND1P27	ENSG00000223921.1	0.91	PRM1	ENSG00000175646.3	1.00	RAP1BP2	ENSG00000214405.3	0.70	RP11-703P11.1	ENSG00000270997.1	0.88
MIR607	ENSG00000207976.1	0.82	OR5M12P	ENSG00000197866.3	0.94	RP11-417O18.2	ENSG00000276487.1	0.99	AC092156.3	ENSG00000227149.1	1.00	RP11-138A23.2	ENSG00000250180.1	0.78	SMCP	ENSG00000163206.5	1.00	RP11-218D6.3	ENSG00000226395.1	1.00	Y_RNA	ENSG00000207105.1	0.78	AC006355.3	ENSG00000229110.1	0.70	AC007131.1	ENSG00000222030.1	1.00	OR9Q2	ENSG00000186513.2	0.83	RP11-412H8.2	ENSG00000258175.1	0.71	RP4-808O4.2	ENSG00000233710.1	0.91	ODF1	ENSG00000155087.3	1.00	XXbac-BPG34I8.3	ENSG00000219738.2	0.70	RP11-94C24.11	ENSG00000250976.1	0.88
RP11-876F14.2	ENSG00000270701.1	0.82	OR2AP1	ENSG00000179615.1	0.94	RP11-467N20.8	ENSG00000278541.1	0.99	RP11-344N17.8	ENSG00000230100.1	1.00	RANP9	ENSG00000253393.1	0.75	DUX4L18	ENSG00000259029.1	0.99	RP1-90J20.2	ENSG00000228365.1	1.00	TSEN15P3	ENSG00000234922.1	0.78				AC016292.1	ENSG00000235361.1	1.00	LINC00254	ENSG00000281219.2	0.83	KRT8P4	ENSG00000248231.1	0.70	AC105342.1	ENSG00000234429.1	0.91	ACTL7A	ENSG00000187003.6	1.00	RP11-335E8.1	ENSG00000271356.1	0.70	CHEK2P5	ENSG00000234541.2	0.88
Y_RNA	ENSG00000238943.1	0.82	RP11-348M3.6	ENSG00000274823.1	0.93	LINC00901	ENSG00000242385.1	0.99	MIR9-1	ENSG00000207933.2	1.00	LINC00895	ENSG00000281548.1	0.75	PDILT	ENSG00000169340.9	0.88	CASC22	ENSG00000260887.2	1.00	PRR13P7	ENSG00000271202.1	0.78				RP11-13N12.1	ENSG00000253496.2	1.00	AC002429.4	ENSG00000231153.1	0.83				RP11-292D4.3	ENSG00000260090.1	0.91	SPPL2C	ENSG00000185294.6	1.00	AC068137.6	ENSG00000230496.1	0.70	SAPCD2P2	ENSG00000235368.1	0.88
CTD-2151A2.3	ENSG00000248928.1	0.82	NR1H5P	ENSG00000227970.1	0.93	HNRNPH3P1	ENSG00000230247.2	0.99	Y_RNA	ENSG00000206690.1	1.00	RP11-218M11.3	ENSG00000263860.1	0.74	CHRDL2	ENSG00000054938.15	0.86	RP11-23E10.5	ENSG00000262090.1	1.00	AC018892.8	ENSG00000230343.1	0.78				AC004987.10	ENSG00000231198.1	1.00	RP3-425C14.7	ENSG00000277408.1	0.83				OR5B17	ENSG00000197786.3	0.91	SUN5	ENSG00000167098.11	1.00	CSPG4P2Y	ENSG00000244231.1	0.70	RP11-488I20.7	ENSG00000260846.2	0.88
SPINT5P	ENSG00000168630.3	0.82	EIF5P2	ENSG00000275800.1	0.93	RN7SL234P	ENSG00000241391.3	0.99	TSPY17P	ENSG00000232620.1	1.00	PWRN2	ENSG00000260551.1	0.72	RP11-60C6.5	ENSG00000256779.1	0.79	RP5-859M6.1	ENSG00000228429.1	1.00	RN7SKP147	ENSG00000252963.1	0.78				RP11-64I5.1	ENSG00000280451.1	1.00	RP11-118K6.2	ENSG00000234182.1	0.83				RP11-633G11.1	ENSG00000248447.2	0.90	C10orf62	ENSG00000203942.4	1.00	RP4-614N24.1	ENSG00000234481.1	0.70	HMGB1P18	ENSG00000236407.1	0.88
RNU1-112P	ENSG00000201271.1	0.82	HMGB1P18	ENSG00000236407.1	0.93	RP4-581F12.1	ENSG00000228041.2	0.99	TTTY25P	ENSG00000259247.1	1.00	RP11-370I10.2	ENSG00000258234.1	0.72	FLJ40288	ENSG00000183470.9	0.79	RP11-98H4.4	ENSG00000254212.1	1.00	RP11-72M10.4	ENSG00000255283.3	0.78				AC063979.1	ENSG00000223497.1	1.00	CTC-359M8.3	ENSG00000271724.1	0.83				RP11-497J7.2	ENSG00000233880.1	0.90	PRM3	ENSG00000178257.3	1.00	RP11-458K10.2	ENSG00000240973.1	0.70	RP11-916L7.1	ENSG00000260945.1	0.88
SS18L2P2	ENSG00000266201.1	0.82	OR10AF1P	ENSG00000255416.1	0.93	YRDCP3	ENSG00000230859.1	0.99	SNORA11B	ENSG00000221102.1	1.00	RP11-339A11.1	ENSG00000235756.2	0.72	HTR1F	ENSG00000179097.5	0.73	DHFRP2	ENSG00000228432.1	1.00	RP4-657M3.2	ENSG00000270241.1	0.78				RP11-427M20.1	ENSG00000251388.1	1.00	RP5-892F13.2	ENSG00000270330.1	0.83				RP11-434D2.7	ENSG00000266925.1	0.90	SPATA19	ENSG00000166118.7	1.00	RP11-285B24.1	ENSG00000243903.1	0.70	RP5-905H7.8	ENSG00000229301.1	0.88
MIR3682	ENSG00000265452.1	0.82	AC062022.1	ENSG00000226946.1	0.93	Metazoa_SRP	ENSG00000275788.1	0.99	RNA5SP335	ENSG00000200687.1	1.00	RP11-639F1.3	ENSG00000242152.1	0.71	TUBAP	ENSG00000237569.1	0.71	AP000797.2	ENSG00000239600.1	1.00	RP11-790I12.3	ENSG00000250828.2	0.78				SNORA63	ENSG00000199363.1	1.00	RP11-215I16.1	ENSG00000249486.1	0.83				RP3-446N13.3	ENSG00000280398.1	0.90	RP11-705O24.1	ENSG00000254119.5	1.00				RP11-73B2.4	ENSG00000232817.1	0.88
RP11-768G3.1	ENSG00000275250.1	0.82	CTB-32P11.1	ENSG00000253538.1	0.93	RP11-393M18.5	ENSG00000274702.1	0.99	RP1-37J18.1	ENSG00000227169.2	1.00	LL22NC03-23C6.13	ENSG00000278657.1	0.71	AP000431.2	ENSG00000229289.1	0.71	RP1-66N13.4	ENSG00000274261.1	1.00	KRT128P	ENSG00000258120.1	0.78				AC084290.2	ENSG00000229899.1	1.00	RP11-35J1.1	ENSG00000236635.2	0.83				KRT8P19	ENSG00000257528.1	0.90	RP11-126O1.2	ENSG00000267579.1	1.00				VN1R38P	ENSG00000235227.1	0.88
RN7SKP189	ENSG00000201912.1	0.82	MTND1P35	ENSG00000255055.1	0.93	RP1-276J11.3	ENSG00000272714.1	0.99	Y_RNA	ENSG00000206646.1	1.00	OR10D3	ENSG00000197309.2	0.70	CADM3-AS1	ENSG00000225670.4	0.70	RP11-305O4.1	ENSG00000241905.1	1.00	OR7A11P	ENSG00000198367.3	0.78				RP11-576E20.1	ENSG00000250819.1	1.00	RP11-758H6.1	ENSG00000253391.1	0.83				CTBP2P3	ENSG00000267153.1	0.90	AC007557.1	ENSG00000223874.1	1.00				SAPCD2P1	ENSG00000213644.2	0.88
RP11-382D12.1	ENSG00000231791.1	0.82	RPL35AP18	ENSG00000220311.1	0.93	OR10Z1	ENSG00000198967.3	0.99	Y_RNA	ENSG00000206911.1	1.00	BANF1P5	ENSG00000225935.1	0.70				VN1R68P	ENSG00000259979.1	1.00	AC092156.3	ENSG00000227149.1	0.78				RP11-449O16.2	ENSG00000229711.1	1.00	SUMO2P2	ENSG00000227607.2	0.83				RP11-20P5.2	ENSG00000229060.4	0.90	TSSK2	ENSG00000206203.4	1.00				RP11-59E19.3	ENSG00000239288.1	0.88
AC115286.1	ENSG00000221053.1	0.82	RP11-419N10.6	ENSG00000276632.1	0.93	ADAM24P	ENSG00000214607.2	0.99	BPIFB5P	ENSG00000233146.1	0.93	CTD-3022L24.1	ENSG00000278972.1	0.70				AC090283.3	ENSG00000224244.1	1.00	RP11-344N17.8	ENSG00000230100.1	0.78				RP11-56H7.2	ENSG00000230112.1	1.00	SNRPGP18	ENSG00000257979.1	0.83				TXNP7	ENSG00000217268.1	0.90	IQCF4	ENSG00000224792.6	1.00				RP11-214O1.1	ENSG00000262786.1	0.88
RP11-222N13.1	ENSG00000254661.2	0.82	RP11-51C14.1	ENSG00000224942.1	0.93	SPATA31E2P	ENSG00000258916.2	0.99	KRTAP2-1	ENSG00000212725.3	0.79							RP11-669M2.1	ENSG00000225006.1	1.00	RP11-481E4.1	ENSG00000259873.1	0.78				AC007091.1	ENSG00000223838.1	1.00	SDR16C6P	ENSG00000253542.7	0.83				AC011995.3	ENSG00000228391.1	0.90	FAM187B	ENSG00000177558.3	1.00				LINC00703	ENSG00000224382.1	0.88
Y_RNA	ENSG00000200834.1	0.82	MTND6P2	ENSG00000250389.1	0.93	OR5B19P	ENSG00000255431.1	0.99	RP11-117D22.1	ENSG00000226938.1	0.74							CTD-2144E22.5	ENSG00000179755.3	1.00	RP11-228O6.2	ENSG00000220725.1	0.78				ZSWIM5P1	ENSG00000235430.1	1.00	PNLIPP1	ENSG00000232091.1	0.83				MTND1P22	ENSG00000251407.1	0.90	C2orf57	ENSG00000177673.3	1.00				SAPCD2P4	ENSG00000234312.1	0.88
RPL34P29	ENSG00000244551.2	0.82	RP4-800O15.3	ENSG00000271184.1	0.93	ZNF402P	ENSG00000220248.1	0.99	RP11-121L11.3	ENSG00000249830.1	0.71							MTND2P19	ENSG00000231567.1	1.00	RP11-738G5.1	ENSG00000253380.1	0.78				CTD-2183H9.7	ENSG00000224069.1	1.00	LARP7P3	ENSG00000265698.1	0.83				CDKN2AIPNLP1	ENSG00000177770.11	0.90	ACTRT2	ENSG00000169717.6	1.00				AC104695.4	ENSG00000227938.1	0.88
RP11-63K6.4	ENSG00000218300.1	0.82	RP11-338N12.1	ENSG00000234269.2	0.93	PPIAP23	ENSG00000214178.3	0.99	TPMTP3	ENSG00000232562.1	0.71							RP11-404L6.2	ENSG00000253787.1	1.00	AL132796.1	ENSG00000237342.1	0.78				RP11-20G6.2	ENSG00000261090.1	1.00	RP11-232C2.3	ENSG00000258719.1	0.83				RP4-705O1.1	ENSG00000230324.1	0.90	SPACA7	ENSG00000153498.11	1.00				CTBP2P1	ENSG00000235857.1	0.87
RNU1-142P	ENSG00000252491.1	0.82	RP5-1158E12.1	ENSG00000234613.1	0.92	OR2T6	ENSG00000198104.2	0.99	RPL7AP72	ENSG00000235735.1	0.71							RMST_9	ENSG00000276398.1	1.00	RP3-399J4.1	ENSG00000216853.1	0.78				RP11-143A22.1	ENSG00000223633.2	1.00	RN7SL163P	ENSG00000266195.2	0.83				RP11-382E9.1	ENSG00000231718.1	0.90	HMGB4	ENSG00000176256.10	1.00				LINC01242	ENSG00000280683.1	0.87
RNU6-282P	ENSG00000202227.1	0.82	RP11-586K12.10	ENSG00000260311.1	0.92	RP11-19D2.2	ENSG00000261249.1	0.99	RP11-100M12.1	ENSG00000258970.1	0.71							CTD-2297D10.1	ENSG00000250866.1	1.00	MTND2P30	ENSG00000227937.1	0.78				ENO1P2	ENSG00000258739.1	1.00	RP11-63H19.6	ENSG00000248328.1	0.83				OR9I1	ENSG00000172377.1	0.90	PRM2	ENSG00000122304.10	1.00				VN1R32P	ENSG00000230361.1	0.87
MIR25	ENSG00000207547.1	0.82	OR52Y1P	ENSG00000231070.1	0.92	RPL7AL2	ENSG00000228210.1	0.99	IGKV1D-42	ENSG00000211633.3	0.71							RP11-44N12.2	ENSG00000229625.3	1.00	RPL30P10	ENSG00000243050.1	0.78				SSU72P6	ENSG00000236175.3	1.00	AC009494.3	ENSG00000216844.1	0.83				DNAJB8	ENSG00000179407.3	0.89	SPATA3	ENSG00000173699.15	1.00				OR8K2P	ENSG00000255134.1	0.87
RP11-541G7.4	ENSG00000277516.1	0.82	HAUS8P1	ENSG00000257300.1	0.92	RP11-384G23.2	ENSG00000274316.1	0.99	OR5BN1P	ENSG00000254848.1	0.71							VN1R69P	ENSG00000260724.1	1.00	RNU2-55P	ENSG00000223078.1	0.78				FAM90A6P	ENSG00000248944.1	1.00	Metazoa_SRP	ENSG00000275222.1	0.83				PGBD4P4	ENSG00000248877.2	0.89	SPATA42	ENSG00000203897.3	1.00				NKAIN2	ENSG00000188580.13	0.87
RP11-54F2.8	ENSG00000279450.1	0.82	RP11-468N14.12	ENSG00000249735.1	0.92	RP11-169L17.3	ENSG00000214031.2	0.99	TTTY5	ENSG00000215560.2	0.71							LINC01377	ENSG00000249808.2	1.00	AC009237.4	ENSG00000238162.1	0.78				AP000477.2	ENSG00000235564.1	1.00	MTND2P7	ENSG00000253970.1	0.83				GYG1P2	ENSG00000237099.1	0.89	RP11-561E1.1	ENSG00000253643.5	1.00				HSPA8P17	ENSG00000228557.1	0.87
RP11-566H8.3	ENSG00000253377.1	0.82	ACTR3BP3	ENSG00000260327.2	0.92	OR5H1	ENSG00000231192.1	0.99	RPL18AP15	ENSG00000236189.2	0.71							AC023274.6	ENSG00000230977.1	1.00	AC108456.2	ENSG00000281686.1	0.78				NXNL1	ENSG00000171773.2	1.00	SIGLEC27P	ENSG00000269580.2	0.83				ZNF299P	ENSG00000219368.3	0.89	RP1-139D8.6	ENSG00000214732.2	1.00				ABCD1P5	ENSG00000214330.4	0.87
MIR552	ENSG00000207941.1	0.82	RP11-167P22.5	ENSG00000238215.1	0.92	OR4F6	ENSG00000184140.5	0.99	CTD-3051L14.14	ENSG00000254660.1	0.71							SGOL1P2	ENSG00000234304.2	1.00	RP11-359E8.3	ENSG00000223649.1	0.78				RP11-252I13.2	ENSG00000249959.5	1.00	IGKV2D-14	ENSG00000254292.1	0.83				OR5AC1	ENSG00000213439.3	0.89	ZNRF4	ENSG00000105428.5	1.00				PAPPA2	ENSG00000116183.10	0.87
SNX2P2	ENSG00000236460.1	0.82	CTD-2285G11.1	ENSG00000250145.1	0.92	RP11-277J6.3	ENSG00000265935.1	0.99	RPS16P8	ENSG00000213664.4	0.70							DNM1P48	ENSG00000239304.1	1.00	RNU6-61P	ENSG00000202398.1	0.78				PABPC1P6	ENSG00000227497.1	1.00	HDHD1P1	ENSG00000234620.1	0.83				AGGF1P5	ENSG00000260680.1	0.89	LELP1	ENSG00000203784.2	1.00				IGLCOR22-2	ENSG00000271093.1	0.86
RP11-927P21.8	ENSG00000272134.1	0.82	MRPS16P3	ENSG00000226336.2	0.92	RP11-735B13.2	ENSG00000242339.1	0.99										COX6CP14	ENSG00000239576.1	1.00	RNU6-291P	ENSG00000207451.1	0.78				IGLCOR22-2	ENSG00000271093.1	1.00	DUX4L18	ENSG00000259029.1	0.83				DLGAP2-AS1	ENSG00000253267.5	0.89	RP4-586O15.1	ENSG00000228504.1	1.00				RP11-548K12.12	ENSG00000231484.1	0.86
AL391416.1	ENSG00000252309.1	0.82	TPMTP4	ENSG00000223574.1	0.92	RP3-446N13.2	ENSG00000280364.1	0.99										RP11-152O14.1	ENSG00000261749.2	1.00	RP1-276J11.3	ENSG00000272714.1	0.78				RPS17P13	ENSG00000224706.1	1.00	RNA5SP512	ENSG00000201420.1	0.83				RP11-542G1.3	ENSG00000251383.1	0.89	LINC00919	ENSG00000260268.5	1.00				FAM27E4	ENSG00000204805.8	0.86
RP11-268P4.2	ENSG00000256774.1	0.82	RP11-268G12.2	ENSG00000233807.1	0.92	OR6N1	ENSG00000197403.3	0.99										BNIP3P3	ENSG00000265631.1	1.00	IGLV3-4	ENSG00000226420.1	0.78				HSPA8P6	ENSG00000235864.1	1.00	DIAPH3-AS2	ENSG00000223815.1	0.83				LL0XNC01-177E8.2	ENSG00000224692.1	0.89	SMCP	ENSG00000163206.5	1.00				RP11-548K12.13	ENSG00000271696.1	0.86
MIR140	ENSG00000208017.2	0.82	OR4A9P	ENSG00000254891.1	0.92	RP11-167N24.4	ENSG00000257583.1	0.99										RP11-316I3.1	ENSG00000237283.1	1.00	CCDC34P1	ENSG00000250556.1	0.78				RP11-38H17.1	ENSG00000254366.6	1.00	RP5-905H7.7	ENSG00000227923.1	0.83				OR2AP1	ENSG00000179615.1	0.89	ACTL7B	ENSG00000148156.7	1.00				ABCD1P4	ENSG00000225293.1	0.85
AC008045.1	ENSG00000221178.1	0.82	LINC01247	ENSG00000227007.1	0.92	RP11-322A17.3	ENSG00000274398.1	0.99										RP11-289E15.1	ENSG00000267428.1	1.00	RP11-163O19.11	ENSG00000255550.1	0.78				RP1-76C18.1	ENSG00000217120.1	1.00	RP11-434D2.8	ENSG00000230339.2	0.83				RP11-626I20.1	ENSG00000257415.1	0.89	PRR30	ENSG00000186143.10	1.00				RP11-702C7.1	ENSG00000230265.1	0.85
MIR647	ENSG00000207554.1	0.82	RP11-485B17.10	ENSG00000278160.1	0.92	RN7SKP61	ENSG00000222574.1	0.99										OR10G3	ENSG00000169208.1	1.00	RN7SKP136	ENSG00000222859.1	0.78				HMGN3P1	ENSG00000183586.8	1.00	RP11-497J7.2	ENSG00000233880.1	0.83				RP11-291J9.1	ENSG00000226998.1	0.89	C10orf53	ENSG00000178645.12	1.00				RP11-214O1.2	ENSG00000266709.1	0.85
RP6-43L17.1	ENSG00000270446.1	0.82	MTND4P13	ENSG00000216713.1	0.92	RP11-474J18.2	ENSG00000249990.1	0.99										RMST_8	ENSG00000278802.1	1.00	RNA5SP151	ENSG00000202502.1	0.78				RP3-334F4.2	ENSG00000216347.1	1.00	CTC-281M20.4	ENSG00000249403.1	0.83				RP11-113E21.2	ENSG00000279910.1	0.89	TSPAN16	ENSG00000130167.13	1.00				OR8K3	ENSG00000181689.1	0.85
RN7SKP183	ENSG00000252978.1	0.82	RP11-147I11.1	ENSG00000228783.1	0.92	KB-288A10.17	ENSG00000230821.1	0.99										RP11-52L11.6	ENSG00000249580.1	1.00	RN7SL782P	ENSG00000239708.3	0.78				RP5-930J4.2	ENSG00000233069.1	1.00	RN7SL860P	ENSG00000240713.3	0.83				GAPDHP53	ENSG00000234069.1	0.89	IQCF2	ENSG00000184345.4	1.00				ZNF90P3	ENSG00000233782.1	0.85
AC119674.1	ENSG00000223307.2	0.82	RP11-63B19.1	ENSG00000236720.1	0.92	RNU2-71P	ENSG00000223327.1	0.99										LINC01053	ENSG00000238169.1	1.00	RP5-986I17.2	ENSG00000232738.1	0.78				CDX4	ENSG00000131264.3	1.00	RNA5SP301	ENSG00000199407.1	0.83				OR6C74	ENSG00000197706.3	0.89	GABRG3-AS1	ENSG00000228740.2	1.00				CPA2	ENSG00000158516.11	0.85
Y_RNA	ENSG00000274118.1	0.82	RP11-691G17.1	ENSG00000261826.1	0.92	RP11-192C21.3	ENSG00000251228.1	0.99										CSN1S2AP	ENSG00000234124.6	1.00	OR10G5P	ENSG00000226461.3	0.78				RP11-511B7.1	ENSG00000250725.2	1.00	RP11-72M10.7	ENSG00000254696.1	0.83				TARS2P1	ENSG00000248104.1	0.89	GAPDHS	ENSG00000105679.8	1.00				RP11-641A6.5	ENSG00000257616.1	0.84
AL096700.1	ENSG00000223018.1	0.82	RP11-501O2.1	ENSG00000241792.1	0.92	OR7C2	ENSG00000127529.7	0.99										RP11-36N20.1	ENSG00000226876.2	1.00	NDUFA5P7	ENSG00000234039.2	0.78				POTEG	ENSG00000187537.13	0.99	RP11-332E19.1	ENSG00000239438.1	0.83				OR51L1	ENSG00000176798.1	0.89	CAPZA3	ENSG00000177938.4	1.00				AC016831.7	ENSG00000233559.1	0.84
MIR186	ENSG00000207721.1	0.82	RP11-152O14.4	ENSG00000261470.1	0.92	LL22NC03-121E8.4	ENSG00000238192.1	0.99										AC062021.1	ENSG00000226939.1	1.00	RP1-28O17.1	ENSG00000230472.5	0.78				LINC00693	ENSG00000228214.6	0.98	RP3-406C18.1	ENSG00000236205.1	0.83				GAPDHP41	ENSG00000277172.1	0.89	AC019055.1	ENSG00000235911.1	1.00				VN1R25P	ENSG00000224947.1	0.84
HINT1P2	ENSG00000271159.1	0.82	AC004866.3	ENSG00000224134.1	0.92	RP11-704C2.1	ENSG00000261194.1	0.99										CTD-2144E22.10	ENSG00000260809.1	1.00	RNU6-516P	ENSG00000223313.1	0.78				RP11-1084I9.1	ENSG00000206187.3	0.98	AC009237.6	ENSG00000224719.1	0.83				RP11-756H20.1	ENSG00000260192.1	0.89	TEX33	ENSG00000185264.11	1.00				BMPR1APS1	ENSG00000219642.2	0.84
RP11-353N14.3	ENSG00000262343.1	0.82	RP11-790I12.3	ENSG00000250828.2	0.92	AADACL3	ENSG00000188984.11	0.99										RP11-415C15.3	ENSG00000251325.1	1.00	CDY10P	ENSG00000226042.1	0.78				KCNK4	ENSG00000182450.12	0.97	MIR5193	ENSG00000263506.1	0.83				FEM1AP3	ENSG00000217770.1	0.88	C16orf82	ENSG00000234186.2	1.00				SSU72P1	ENSG00000226547.2	0.84
Y_RNA	ENSG00000212512.2	0.82	ARL2BPP2	ENSG00000258071.1	0.92	OR4D8P	ENSG00000204989.3	0.99										RP4-630C24.3	ENSG00000241345.1	1.00	MTND1P26	ENSG00000234576.1	0.78				RP11-398J10.2	ENSG00000258489.3	0.96	RP11-472F21.1	ENSG00000274970.1	0.83				OR14A2	ENSG00000241128.1	0.88	TEX36-AS1	ENSG00000237675.5	1.00				RP5-828H9.4	ENSG00000276688.1	0.84
RP11-363E6.1	ENSG00000254014.1	0.82	RP11-293N14.1	ENSG00000260223.1	0.92	RP11-959F10.5	ENSG00000253547.2	0.99										DYNAP	ENSG00000178690.2	1.00	RP11-448N11.2	ENSG00000217067.2	0.78				PRY	ENSG00000169789.10	0.96	RN7SL483P	ENSG00000244091.1	0.83				IGHV3-63	ENSG00000253936.1	0.88	TNP2	ENSG00000178279.3	1.00				RP11-368M16.7	ENSG00000234085.1	0.83
RP11-550C4.6	ENSG00000226594.1	0.82	RP11-206B11.1	ENSG00000280051.1	0.92	RP11-638O6.1	ENSG00000249452.2	0.99										DUSP26	ENSG00000133878.8	1.00	RN7SKP46	ENSG00000251751.1	0.78				KCNK2	ENSG00000082482.13	0.95	KB-1247B1.1	ENSG00000249510.1	0.83				RP11-173D14.3	ENSG00000229495.1	0.88	FAM71B	ENSG00000170613.4	1.00				ALG1L14P	ENSG00000250268.3	0.83
AC099796.1	ENSG00000265404.1	0.82	RP11-350A1.2	ENSG00000260959.1	0.92	RP4-675G8.3	ENSG00000226804.4	0.99										RP11-502M1.2	ENSG00000249425.1	1.00	RP11-448N11.3	ENSG00000262566.1	0.78				RP11-259O2.3	ENSG00000249731.1	0.94	RP11-371E8.2	ENSG00000258595.2	0.83				RP5-998G20.1	ENSG00000230706.2	0.88	TSSK1B	ENSG00000212122.3	1.00				GLP1R	ENSG00000112164.5	0.82
RP11-63H19.8	ENSG00000249045.1	0.82	RP11-789C7.1	ENSG00000278933.1	0.92	OR4M1	ENSG00000176299.4	0.99										TUBBP5	ENSG00000159247.12	1.00	TTTY4B	ENSG00000235412.1	0.78				RP11-167P23.2	ENSG00000169164.7	0.92	RP11-278I4.1	ENSG00000254247.1	0.83				OR4A3P	ENSG00000254464.1	0.88	FAM71A	ENSG00000162771.7	1.00				OR8K3	ENSG00000280314.1	0.82
AC073987.2	ENSG00000227623.1	0.82	RP11-433B3.1	ENSG00000250594.2	0.92	IGLV3-4	ENSG00000226420.1	0.99										RP11-244B22.10	ENSG00000280180.1	0.99	TAB3P1	ENSG00000235462.1	0.78				RP11-216L13.16	ENSG00000204003.8	0.92	RP11-318I4.2	ENSG00000251005.1	0.83				OR4C46	ENSG00000185926.1	0.88	PRSS37	ENSG00000165076.13	1.00				RP11-80F22.2	ENSG00000269622.1	0.82
RP11-272G22.2	ENSG00000226110.2	0.82	RN7SKP196	ENSG00000252076.1	0.92	KRTAP13-6P	ENSG00000250973.1	0.99										GRM7	ENSG00000196277.15	0.99	RP11-486M3.3	ENSG00000275419.1	0.78				RP11-47P18.2	ENSG00000242781.1	0.90	RN7SKP130	ENSG00000201794.1	0.83				AC073310.4	ENSG00000214035.3	0.88	SLIT1-AS1	ENSG00000234855.1	1.00				RP11-6B4.1	ENSG00000243694.2	0.81
RP11-3L10.2	ENSG00000227371.1	0.82	RP11-260M19.1	ENSG00000258598.1	0.92	RN7SL120P	ENSG00000244169.3	0.99										AF131217.1	ENSG00000232855.6	0.99	RP11-461K13.1	ENSG00000226140.5	0.78				HSFY3P	ENSG00000227289.1	0.90	MTND4P21	ENSG00000231777.1	0.83				MTND5P9	ENSG00000248748.1	0.88	RP11-73G16.3	ENSG00000249818.1	1.00				VENTXP1	ENSG00000259849.1	0.81
CTD-2062O1.1	ENSG00000240281.2	0.82	RP11-450H5.3	ENSG00000240458.1	0.92	RP11-417D4.1	ENSG00000237891.1	0.99										RP11-313L6.2	ENSG00000278958.1	0.99	AC130464.1	ENSG00000228480.1	0.78				LINC01378	ENSG00000236922.9	0.90	AC000081.2	ENSG00000230194.1	0.83				CTBP2P6	ENSG00000213697.3	0.88	RP11-2L4.1	ENSG00000261176.1	1.00				NMD3P2	ENSG00000231504.1	0.80
RNA5SP97	ENSG00000201876.1	0.82	RN7SKP280	ENSG00000201066.1	0.92	AC000362.1	ENSG00000230820.2	0.99										CELA3A	ENSG00000142789.19	0.99	RP1-34P24.3	ENSG00000280199.1	0.78				RP5-857K21.7	ENSG00000229344.1	0.88	PPP1R1AP2	ENSG00000261084.1	0.83				HNRNPA1P56	ENSG00000248640.1	0.88	CSMD2-AS1	ENSG00000231163.5	1.00				MN1	ENSG00000169184.5	0.80
TCEB1P32	ENSG00000257465.2	0.82	RP11-793L10.1	ENSG00000219757.1	0.92	OR8V1P	ENSG00000230213.1	0.99										GYPA	ENSG00000170180.19	0.99	RP4-655L22.5	ENSG00000278317.1	0.78				CTD-2130F23.2	ENSG00000251518.1	0.88	AC064874.1	ENSG00000222007.6	0.83				RN7SKP77	ENSG00000200131.1	0.88	RP11-846C15.2	ENSG00000267101.5	1.00				RP11-662I13.3	ENSG00000278969.1	0.80
RN7SKP174	ENSG00000200673.1	0.82	PSMB7P1	ENSG00000259074.1	0.92	MTND4P8	ENSG00000248548.1	0.99										RALYL	ENSG00000184672.11	0.99	BTF3P15	ENSG00000237242.1	0.78				CPXCR1	ENSG00000147183.9	0.87	RP11-25L19.1	ENSG00000280317.1	0.83				RP11-158C21.3	ENSG00000248611.1	0.88	C1orf185	ENSG00000204006.8	1.00				RP11-364B6.2	ENSG00000243500.1	0.79
RNU6-438P	ENSG00000202431.1	0.82	AC018880.2	ENSG00000231723.1	0.92	OR4R3P	ENSG00000254624.1	0.99										ESR1	ENSG00000091831.21	0.99	NDUFA5P5	ENSG00000242365.1	0.78				RP11-538I12.3	ENSG00000260922.1	0.87	IGHV3-30-2	ENSG00000253587.1	0.83				RP11-406A20.4	ENSG00000227555.1	0.88	TEX38	ENSG00000186118.8	1.00				RP11-340I6.1	ENSG00000234387.1	0.79
TRMT112P5	ENSG00000250161.1	0.82	RNA5SP250	ENSG00000199404.1	0.92	DEFB129	ENSG00000125903.4	0.99										LRP1B	ENSG00000168702.16	0.98	RBMY1B	ENSG00000242875.6	0.78				LINC00895	ENSG00000281548.1	0.87	RP11-797H7.6	ENSG00000277206.1	0.83				RP11-643N23.1	ENSG00000253198.1	0.87	RNF151	ENSG00000179580.9	1.00				RP11-138A9.2	ENSG00000273319.1	0.79
RPS23P5	ENSG00000251374.1	0.82	TUBB4BP5	ENSG00000224062.4	0.92	SLC29A4P2	ENSG00000214660.6	0.99										ASCL1	ENSG00000139352.3	0.98	VN1R36P	ENSG00000230639.1	0.78				LGI3	ENSG00000168481.8	0.86	RBM22P13	ENSG00000261284.2	0.83				OR52M1	ENSG00000197790.1	0.87	C20orf144	ENSG00000149609.5	1.00				RP11-80F22.8	ENSG00000261733.1	0.79
RP11-566H8.1	ENSG00000253275.1	0.82	PPATP2	ENSG00000271433.1	0.92	CTD-2320B12.2	ENSG00000259012.2	0.99										CSH1	ENSG00000136488.14	0.98	RNU4-27P	ENSG00000222821.1	0.78				LINC00924	ENSG00000259134.5	0.86	RIT2	ENSG00000152214.12	0.83				AJ009632.3	ENSG00000224247.1	0.87	CST13P	ENSG00000204663.9	1.00				RP11-152N13.16	ENSG00000272599.2	0.79
AC092168.4	ENSG00000228488.1	0.82	IGHVII-51-2	ENSG00000253941.1	0.92	PPATP2	ENSG00000271433.1	0.99										TUBB8P12	ENSG00000173213.8	0.98	U6	ENSG00000280637.1	0.78				RP11-458K10.1	ENSG00000242072.1	0.83	CTD-2244C20.1	ENSG00000249878.1	0.83				RP5-947P14.2	ENSG00000230932.2	0.87	RP11-132M7.3	ENSG00000228290.6	1.00				SSMEM1	ENSG00000165120.3	0.78
CTD-2014E2.6	ENSG00000261475.2	0.82	RP11-5P18.3	ENSG00000231353.1	0.92	TAS2R16	ENSG00000128519.3	0.99										TMEM229A	ENSG00000234224.2	0.98	TTTY4C	ENSG00000228296.1	0.78				CTD-2207A17.1	ENSG00000248461.1	0.82	GSTA9P	ENSG00000243236.6	0.82				MTATP6P2	ENSG00000270307.1	0.87	PRSS58	ENSG00000258223.6	1.00				KIAA0040	ENSG00000235750.9	0.78
OR4A7P	ENSG00000255349.1	0.82	RP11-752P2.1	ENSG00000264388.1	0.92	EEF1GP2	ENSG00000250346.1	0.99										CASR	ENSG00000036828.13	0.97	HSFY2	ENSG00000169953.11	0.78				AP000997.1	ENSG00000255599.1	0.82	RP11-15F12.1	ENSG00000264269.1	0.82				RPL3P8	ENSG00000232199.1	0.87	RP11-1136G4.1	ENSG00000261171.1	1.00				OR4C10P	ENSG00000184789.6	0.78
MIR1184-2	ENSG00000221190.1	0.82	AP006288.1	ENSG00000237363.1	0.92	AC004941.3	ENSG00000228151.1	0.99										RP11-21A7A.3	ENSG00000256341.1	0.97	RBMY1E	ENSG00000242389.7	0.78				USP9YP8	ENSG00000229416.1	0.81	AC068137.8	ENSG00000249997.1	0.81				RP11-447M4.1	ENSG00000260670.1	0.87	RP11-73G16.1	ENSG00000251249.1	1.00				EEF1GP5	ENSG00000234785.1	0.78
AP000290.1	ENSG00000281214.1	0.82	RP13-147D17.1	ENSG00000213489.3	0.92	RP11-576E20.1	ENSG00000250819.1	0.99										SLC8A3	ENSG00000100678.18	0.97	AC016903.2	ENSG00000237843.1	0.78				GS1-531I17.2	ENSG00000270870.1	0.81	HYALP1	ENSG00000228211.2	0.81				RP11-228G3.1	ENSG00000258358.2	0.87	SPERT	ENSG00000174015.9	1.00				LMX1B	ENSG00000136944.17	0.78
AC131056.6	ENSG00000278395.1	0.82	RP11-77B22.2	ENSG00000253648.1	0.92	RN7SKP220	ENSG00000222543.1	0.99										EPHA7	ENSG00000135333.13	0.97	RP11-1059L18.1	ENSG00000253271.2	0.78				RP11-503C24.2	ENSG00000237987.1	0.81	RP4-668E10.3	ENSG00000278446.1	0.80				RP11-404F10.5	ENSG00000274562.1	0.87	TRIM42	ENSG00000155890.3	1.00				C3orf80	ENSG00000180044.4	0.78
AC079896.1	ENSG00000231781.1	0.82	RP11-157B13.8	ENSG00000268597.1	0.92	OR5M1	ENSG00000255012.1	0.99										AC093627.7	ENSG00000232325.4	0.97	TTTY4	ENSG00000226906.1	0.78				LCN10	ENSG00000187922.13	0.81	RP11-760D2.4	ENSG00000223740.1	0.80				TUBB4BP7	ENSG00000217372.2	0.87	CST8	ENSG00000125815.8	1.00				AC017053.1	ENSG00000234275.1	0.78
RP11-226P1.1	ENSG00000241891.1	0.82	RPS7P13	ENSG00000235425.2	0.92	RP11-419N10.5	ENSG00000235226.1	0.99										RP11-5O23.2	ENSG00000279694.1	0.97	RP11-359D14.3	ENSG00000224218.1	0.78				RYR2	ENSG00000198626.15	0.80	AL031601.4	ENSG00000271650.1	0.79				OR8B4	ENSG00000198657.5	0.87	MS4A5	ENSG00000166930.6	1.00				ZDHHC14	ENSG00000175048.16	0.77
FAM71BP1	ENSG00000270683.1	0.82	RP11-128P17.1	ENSG00000267425.1	0.92	RP11-616M22.10	ENSG00000261564.1	0.99										RP11-885N19.6	ENSG00000237419.1	0.96	CTD-2383I20.1	ENSG00000249994.1	0.78				GCNT1P4	ENSG00000219653.1	0.80	RP11-241G9.3	ENSG00000249295.1	0.79				RP11-285M22.2	ENSG00000264431.1	0.87	C16orf78	ENSG00000166152.3	1.00				RP11-760D2.7	ENSG00000213650.3	0.76
RPL7L1P10	ENSG00000237322.1	0.82	CTC-305H11.1	ENSG00000248145.1	0.92	ADAM20P2	ENSG00000248574.1	0.99										RP11-244B22.6	ENSG00000261398.1	0.96	RP11-403P14.1	ENSG00000225487.2	0.78				ANGPTL7	ENSG00000171819.4	0.80	RN7SKP231	ENSG00000200151.1	0.79				RP13-147D17.1	ENSG00000213489.3	0.87	RP11-58O3.2	ENSG00000254262.1	1.00				RP11-368M16.3	ENSG00000243981.4	0.76
AC096732.2	ENSG00000226655.1	0.82	RP11-552J9.13	ENSG00000225397.1	0.92	CTB-88F18.2	ENSG00000250080.1	0.99										TUBB8P8	ENSG00000213113.3	0.96	RPL36AP53	ENSG00000224664.2	0.78				AC084082.3	ENSG00000253190.3	0.80	KHDC3L	ENSG00000203908.3	0.79				RCC2P5	ENSG00000241018.1	0.87	AC114783.1	ENSG00000237524.7	1.00				AP000281.2	ENSG00000232360.1	0.76
RP11-244B22.13	ENSG00000261510.1	0.82	RP11-521E5.1	ENSG00000251326.1	0.92	TMCC1P1	ENSG00000253318.1	0.99										TECRL	ENSG00000205678.7	0.96	KRTAP19-4	ENSG00000186967.6	0.78				ST6GAL2-IT1	ENSG00000238250.1	0.80	OR8X1P	ENSG00000255048.1	0.79				RPL23AP76	ENSG00000226156.1	0.87	PIK3R3	ENSG00000278139.1	1.00				LINC00686	ENSG00000237687.2	0.76
PCDH9-AS2	ENSG00000228842.3	0.82	RP11-420O16.1	ENSG00000249854.1	0.92	RP11-463J7.1	ENSG00000236025.1	0.99										TACR3	ENSG00000169836.4	0.96	RN7SL712P	ENSG00000266828.2	0.78				HCN1	ENSG00000164588.4	0.80	OR4D11	ENSG00000176200.1	0.79				RP11-524L6.2	ENSG00000228367.3	0.87	FAM205A	ENSG00000205108.5	1.00				PTGER1	ENSG00000160951.3	0.75
RN7SKP278	ENSG00000222436.1	0.82	RP11-63H19.6	ENSG00000248328.1	0.92	AC011518.1	ENSG00000267204.1	0.99										WI2-2373I1.2	ENSG00000248767.1	0.96	CTD-2023J5.1	ENSG00000255076.2	0.78				LINC00870	ENSG00000243083.5	0.80	OR8D2	ENSG00000197263.3	0.79				HSPA8P6	ENSG00000235864.1	0.87	ADIG	ENSG00000182035.11	1.00				RP11-554F20.1	ENSG00000237461.1	0.75
KB-1299A7.2	ENSG00000253717.1	0.82	RP5-1189K21.2	ENSG00000230130.1	0.92	RP11-760D2.11	ENSG00000261275.1	0.99										LINC01346	ENSG00000233304.5	0.96	RP11-529A4.16	ENSG00000278837.1	0.78				PTCH2	ENSG00000117425.13	0.80	OR8D2	ENSG00000279116.1	0.79				SEPHS1P7	ENSG00000231926.1	0.87	RP11-147C23.1	ENSG00000237435.8	1.00				RP11-364B6.1	ENSG00000215869.3	0.75
RP11-313I2.6	ENSG00000255170.2	0.82	RP11-1360M22.10	ENSG00000274347.1	0.92	RP11-296L22.8	ENSG00000230729.1	0.99										CRABP1	ENSG00000166426.7	0.95	RP11-154D9.1	ENSG00000257865.1	0.78				RP11-136I14.5	ENSG00000255689.1	0.80	AF064858.10	ENSG00000237609.1	0.77				OR2J1	ENSG00000204702.4	0.87	SCP2D1	ENSG00000132631.5	1.00				SNAP25-AS1	ENSG00000227906.7	0.74
SNORD116-22	ENSG00000275127.1	0.82	RP3-377O6.2	ENSG00000270308.1	0.92	RP5-896L10.1	ENSG00000232825.1	0.99										KCNK17	ENSG00000124780.13	0.95	OR9G4	ENSG00000172457.5	0.78				TTTY6B	ENSG00000131548.7	0.79	GPR53P	ENSG00000229281.1	0.77				OR51A10P	ENSG00000230484.2	0.87	RP11-402G3.5	ENSG00000230054.1	1.00				CTB-31C7.3	ENSG00000268685.1	0.74
RP11-171N4.4	ENSG00000248912.1	0.82	LL22NC03-86D4.1	ENSG00000236052.1	0.92	RP11-19H6.1	ENSG00000270440.1	0.99										CYP2W1	ENSG00000073067.13	0.95	XXyac-YR12DB5.1	ENSG00000233446.2	0.77				EBF2	ENSG00000221818.8	0.78	OR10Z1	ENSG00000198967.3	0.77				VN1R17P	ENSG00000235818.3	0.87	RP11-202D1.2	ENSG00000260433.1	1.00				RP11-368M16.6	ENSG00000236261.1	0.74
OR4A49P	ENSG00000254472.1	0.82	RN7SKP149	ENSG00000199878.1	0.92	EEF1A1P41	ENSG00000223600.1	0.99										TUBB8P7	ENSG00000261812.5	0.95	RP11-798K23.4	ENSG00000253652.1	0.77				LINC01297	ENSG00000274827.4	0.78	RP11-419L4.1	ENSG00000250193.1	0.77				RP1-140J1.1	ENSG00000229699.1	0.87	C20orf141	ENSG00000258713.2	1.00				GUSBP12	ENSG00000169325.10	0.74
RP11-45P22.2	ENSG00000233477.1	0.82	COX5BP1	ENSG00000248448.2	0.92	RP11-552J9.9	ENSG00000228354.1	0.99										CEACAMP7	ENSG00000227349.1	0.95	OR4C3	ENSG00000176547.8	0.76				NGF	ENSG00000134259.3	0.77	RNU2-59P	ENSG00000222414.1	0.77				OR5M7P	ENSG00000254490.1	0.87	CTC-360P9.2	ENSG00000267684.1	1.00				RN7SL813P	ENSG00000241074.3	0.74
snoU13	ENSG00000239137.1	0.82	CTD-2333M24.1	ENSG00000249490.1	0.92	RPL7L1P4	ENSG00000249582.1	0.99										CTD-2028E8.2	ENSG00000279701.1	0.95	RP11-12D5.6	ENSG00000224589.1	0.76				PGM5P4-AS1	ENSG00000231943.7	0.77	RP11-430H10.2	ENSG00000255267.3	0.77				OR5L2	ENSG00000205030.1	0.87	TNP1	ENSG00000118245.2	1.00				TMEM132E	ENSG00000181291.6	0.74
RP11-72M10.8	ENSG00000255110.1	0.82	AC007064.25	ENSG00000237358.1	0.92	RP11-575B7.3	ENSG00000238242.1	0.99										RP5-921G16.1	ENSG00000242593.5	0.95	ACTR3BP5	ENSG00000227264.3	0.76				RPL9P7	ENSG00000238103.4	0.77	SMIM9	ENSG00000203870.5	0.77				RIOK3P1	ENSG00000225944.1	0.87	WBSCR28	ENSG00000175877.3	1.00				AC016831.3	ENSG00000240680.1	0.74
RP11-737F9.1	ENSG00000253992.1	0.82	RP11-428F18.2	ENSG00000274919.1	0.92	SHC1P1	ENSG00000230889.2	0.99										CASC6	ENSG00000224944.1	0.94	OR10J9P	ENSG00000249197.1	0.76				RP11-385G16.1	ENSG00000274682.1	0.77	AF064858.11	ENSG00000237721.1	0.76				RP11-386B1.1	ENSG00000254482.1	0.87	SMIM23	ENSG00000185662.8	1.00				LINC01478	ENSG00000267337.1	0.74
RP11-335M9.1	ENSG00000258184.1	0.82	RP11-14J7.1	ENSG00000239327.1	0.92	RPL7AP72	ENSG00000235735.1	0.99										CTD-2144E22.9	ENSG00000279165.1	0.94	UBE2Q2P9	ENSG00000244130.1	0.76				RP11-532L16.1	ENSG00000213045.3	0.77	RP11-15F12.3	ENSG00000265128.1	0.76				RP11-561G1.3	ENSG00000226888.2	0.87	LYZL2	ENSG00000151033.8	1.00				RN7SL73P	ENSG00000265882.2	0.73
AC098592.6	ENSG00000227965.1	0.82	CEND1P1	ENSG00000213159.4	0.92	VN1R70P	ENSG00000261515.1	0.99										RP11-445P19.3	ENSG00000272827.1	0.94	KRTAP9-3	ENSG00000204873.4	0.75				CLDN10	ENSG00000134873.9	0.76	RP11-769N22.2	ENSG00000276507.1	0.76				CNGA2	ENSG00000183862.5	0.87	RP11-547C13.1	ENSG00000234860.1	1.00				RP11-103J17.2	ENSG00000261761.3	0.73
RP11-449D8.3	ENSG00000266809.1	0.82	RNU2-10P	ENSG00000252184.1	0.92	ZFYVE9P1	ENSG00000229562.1	0.99										LINC01088	ENSG00000249307.5	0.94	AC002383.2	ENSG00000227863.2	0.75				FAM180B	ENSG00000196666.4	0.76	MYO16-AS2	ENSG00000229938.1	0.76				MTRNR2L11	ENSG00000270188.1	0.87	ASB17	ENSG00000154007.6	1.00				RP11-760D2.4	ENSG00000223740.1	0.73
AC108933.1	ENSG00000280678.1	0.82	RN7SL87P	ENSG00000239390.3	0.92	AC004945.1	ENSG00000222024.2	0.99										RP11-386B13.4	ENSG00000248517.1	0.93	CTD-2396E7.9	ENSG00000268203.1	0.75				RP11-327J17.1	ENSG00000259763.1	0.76	AF064858.8	ENSG00000235888.1	0.76				RP11-141A19.2	ENSG00000230114.1	0.87	C3orf30	ENSG00000163424.8	1.00				RN7SL556P	ENSG00000277265.1	0.73
AL163193.1	ENSG00000252324.1	0.82	CTD-2272D18.2	ENSG00000253581.1	0.92	RP11-10B2.1	ENSG00000230916.2	0.99										OR51C1P	ENSG00000197674.5	0.93	RPL7AL2	ENSG00000228210.1	0.74				POTEH	ENSG00000198062.14	0.76	C16orf97	ENSG00000261190.5	0.76				RP11-769N22.1	ENSG00000249228.1	0.87	TMEM239	ENSG00000198326.9	1.00				RP11-432M24.4	ENSG00000176882.5	0.72
AC022384.2	ENSG00000273665.1	0.82	RP11-768G3.1	ENSG00000275250.1	0.92	RBM22P12	ENSG00000260631.1	0.99										OR51E1	ENSG00000180785.8	0.93	RP11-955H22.4	ENSG00000256496.1	0.74				GLRXP3	ENSG00000118990.5	0.76	OR10G6	ENSG00000198674.3	0.76				AC004535.2	ENSG00000236414.1	0.86	CCDC179	ENSG00000255359.2	1.00				AC000110.1	ENSG00000236105.1	0.72
MIR4295	ENSG00000264763.1	0.82	KRTAP25-1	ENSG00000232263.1	0.92	OR6C4	ENSG00000179626.3	0.99										EMX2	ENSG00000170370.11	0.93	AP000459.7	ENSG00000227716.1	0.74				RP11-458K10.3	ENSG00000243345.1	0.76	CTC-304I17.3	ENSG00000265775.1	0.75				RP11-715G15.1	ENSG00000237468.2	0.86	RP11-152O14.4	ENSG00000261470.1	1.00				RP11-123K19.1	ENSG00000224842.2	0.72
RNU4-45P	ENSG00000202339.1	0.82	RP11-480G7.3	ENSG00000261725.1	0.92	PHKG1P2	ENSG00000228645.2	0.99										ERC2	ENSG00000187672.12	0.93	OR4C12	ENSG00000221954.2	0.74				RPS3AP46	ENSG00000226132.1	0.76	RP11-539D10.1	ENSG00000278602.1	0.75				OR5K4	ENSG00000196098.2	0.86	LINC01333	ENSG00000249343.1	1.00				RP11-2E11.6	ENSG00000270823.1	0.72
CTD-3020H12.3	ENSG00000269651.1	0.82	RP3-378P9.1	ENSG00000238066.1	0.92	ELL2P4	ENSG00000226388.1	0.99										OVOS2	ENSG00000177359.17	0.93	FABP12P1	ENSG00000216265.1	0.74				NANOGP1	ENSG00000176654.12	0.75	OR11G1P	ENSG00000258468.1	0.74				FLJ31662	ENSG00000233907.1	0.86	TEX35	ENSG00000240021.9	1.00				TP53TG3	ENSG00000183632.14	0.72
RP11-109E10.1	ENSG00000254823.1	0.82	RP11-566H8.3	ENSG00000253377.1	0.92	RP4-815D20.1	ENSG00000279578.1	0.99										RMST	ENSG00000255794.6	0.93	CTD-2285G11.1	ENSG00000250145.1	0.74				RP11-627D16.2	ENSG00000259509.2	0.75	HMGB3P18	ENSG00000220184.2	0.74				RP11-497J7.4	ENSG00000271088.1	0.86	LINC01052	ENSG00000234767.1	1.00				ARL5AP4	ENSG00000224806.2	0.71
OR4C14P	ENSG00000233301.1	0.82	RP11-479G22.7	ENSG00000229878.1	0.92	U3	ENSG00000280704.1	0.99										ZNF516	ENSG00000101493.10	0.92	AC004129.9	ENSG00000213798.3	0.74				ZPBP	ENSG00000042813.7	0.75	TAAR2	ENSG00000146378.6	0.74				AC013727.1	ENSG00000232597.5	0.86	LYZL1	ENSG00000120563.8	1.00				COPG2	ENSG00000158623.14	0.71
RNU6-658P	ENSG00000207336.1	0.82	RP11-315A16.4	ENSG00000280185.1	0.92	RP11-555E9.1	ENSG00000282759.1	0.99										RP11-324L17.1	ENSG00000272551.1	0.92	ATP5I	ENSG00000169020.9	0.74				AC019117.1	ENSG00000236318.1	0.75	CTB-147C22.6	ENSG00000279676.1	0.74				OR6C69P	ENSG00000213451.2	0.86	PRSS54	ENSG00000103023.11	1.00				RP11-43P5.3	ENSG00000279666.1	0.71
SNORA25	ENSG00000201245.1	0.82	RN7SL624P	ENSG00000265777.2	0.92	RP11-391J13.1	ENSG00000249411.1	0.99										RP11-261N11.8	ENSG00000203900.2	0.92	UBDP1	ENSG00000225797.2	0.74				RP11-31H5.2	ENSG00000279683.1	0.75	RP11-282A11.2	ENSG00000279157.1	0.74				ASS1P4	ENSG00000213487.3	0.86	RP4-742N3.1	ENSG00000233417.1	1.00				AC012497.2	ENSG00000228374.1	0.71
LINC01495	ENSG00000255323.5	0.82	CTD-2335L22.6	ENSG00000259016.1	0.92	TSEN2P1	ENSG00000251174.1	0.99										AC011525.4	ENSG00000267465.6	0.92	PPP1R2P5	ENSG00000229360.1	0.73				PPP2R2C	ENSG00000074211.13	0.75	RN7SL700P	ENSG00000244521.3	0.73				AC073869.7	ENSG00000237910.1	0.86	DAB1-AS1	ENSG00000226759.7	1.00				RP5-905H7.11	ENSG00000230000.2	0.71
RP11-313F23.3	ENSG00000255628.1	0.82	RP4-560B9.5	ENSG00000232261.1	0.92	PIGPP3	ENSG00000228958.1	0.99										TUBB7P	ENSG00000251297.1	0.92	RP11-627H22.6	ENSG00000249386.1	0.73				ZBED1P1	ENSG00000250304.2	0.74	TPI1P4	ENSG00000225455.3	0.73				TRIM60P13	ENSG00000227247.1	0.86	CTD-2015G9.1	ENSG00000260026.1	1.00				HS3ST3B1	ENSG00000125430.8	0.71
RP11-95L3.2	ENSG00000228730.1	0.82	RP3-433G13.1	ENSG00000228855.1	0.92	OR4X1	ENSG00000279260.1	0.99										RP11-158I3.1	ENSG00000268473.1	0.91	MSANTD2P1	ENSG00000231058.1	0.73				RP11-381P6.1	ENSG00000264660.2	0.74	LINC01217	ENSG00000251219.1	0.73				RP11-698E18.1	ENSG00000251588.2	0.86	ADAM6	ENSG00000271968.2	1.00				EXOC4	ENSG00000131558.14	0.71

## Sheet: LINC01387
BRCA Tumor			CESC Tumor			CHOL Tumor			ESCA Tumor			GBM Tumor			KICH Tumor			KIRC Tumor			LIHC Tumor			LUAD Tumor			MESO Tumor			SARC Tumor			SKCM Tumor			STAD Tumor			UCS Tumor
RP11-318I4.1	ENSG00000251649.1	0.99	RP11-126O22.2	ENSG00000282306.1	0.81	RPL7L1P12	ENSG00000231981.3	1.00	Y_RNA	ENSG00000207021.1	0.99	CTD-2124B20.3	ENSG00000265174.1	0.91	RP11-789F5.1	ENSG00000239767.1	0.95	SCG3	ENSG00000104112.8	0.94	CTD-2006M22.2	ENSG00000278934.1	0.79	RP11-394I13.1	ENSG00000260868.1	0.84	CTB-47B8.1	ENSG00000244331.1	0.95	RP11-788A1.1	ENSG00000274353.1	0.86	RP11-170L9.1	ENSG00000254437.1	0.99	KRTAP9-10P	ENSG00000237183.1	0.90	RP11-75L1.1	ENSG00000256582.1	0.85
RP5-1059H15.1	ENSG00000227722.1	0.99	RP11-126O22.4	ENSG00000282358.1	0.78	AC055736.4	ENSG00000281474.1	1.00	RNU1-95P	ENSG00000252166.1	0.99	RP11-479O16.1	ENSG00000248475.5	0.78	RP11-433A19.2	ENSG00000273588.1	0.95	BSN	ENSG00000164061.4	0.92	OR7E89P	ENSG00000243792.1	0.79	VIT	ENSG00000205221.12	0.81	RP11-415I12.1	ENSG00000240027.2	0.92	RP11-712L6.8	ENSG00000278215.1	0.86	OR2AS1P	ENSG00000227102.2	0.99	MTND6P20	ENSG00000254156.1	0.90	CLEC3B	ENSG00000163815.5	0.84
CTD-2023N9.3	ENSG00000249436.1	0.96	RP11-126O22.1	ENSG00000232111.2	0.78	VN1R53P	ENSG00000236313.1	1.00	RNU1-128P	ENSG00000252513.1	0.99	NXF2	ENSG00000269405.6	0.77	RP11-216N14.9	ENSG00000233222.2	0.94	NRG3-AS1	ENSG00000225738.2	0.92	NKX2-4	ENSG00000125816.4	0.79	SIGLEC6	ENSG00000105492.15	0.81	CTC-512J14.1	ENSG00000244076.1	0.92	CTD-3107M8.1	ENSG00000253346.1	0.86	AC092580.2	ENSG00000232979.1	0.99	LINC01427	ENSG00000225321.1	0.89	MMRN1	ENSG00000138722.9	0.82
CTD-2124B20.3	ENSG00000265174.1	0.95	RP11-126O22.11	ENSG00000282300.1	0.77	RPS29P12	ENSG00000243664.1	1.00	RN7SL282P	ENSG00000243591.3	0.98	RP13-614K11.2	ENSG00000226374.1	0.77	RP11-31K23.1	ENSG00000254079.1	0.94	SIX6	ENSG00000184302.6	0.90	RP11-179A10.3	ENSG00000270897.1	0.79	FXNP2	ENSG00000177736.4	0.81	NAMPTP3	ENSG00000261053.1	0.92	RP5-1073F15.1	ENSG00000241913.1	0.86	LINC00366	ENSG00000229437.1	0.99	PHBP10	ENSG00000232665.2	0.89	AC007131.1	ENSG00000222030.1	0.82
OR8S1	ENSG00000197376.2	0.91	RP11-126O22.9	ENSG00000281955.1	0.77	RP11-480O10.2	ENSG00000254425.1	1.00	TRBV25OR9-2	ENSG00000240215.4	0.93	PHF2P2	ENSG00000226057.6	0.77	RP3-364H10.1	ENSG00000271042.1	0.94	CRH	ENSG00000147571.4	0.90	RP11-810K23.9	ENSG00000261048.1	0.79	7SK	ENSG00000271394.1	0.81	RP1-15D7.1	ENSG00000216676.2	0.92	RP11-21I4.4	ENSG00000278441.1	0.86	SS18L2P1	ENSG00000232525.1	0.99	RNU4-66P	ENSG00000202069.1	0.89	FHL5	ENSG00000112214.10	0.82
RPS20P1	ENSG00000229761.1	0.86	LINC00700	ENSG00000234962.5	0.76	LINC01217	ENSG00000251219.1	1.00	RP11-146G7.2	ENSG00000263797.1	0.91	RP11-368M16.3	ENSG00000243981.4	0.77	NF1P5	ENSG00000175319.3	0.94	CTD-2124B20.3	ENSG00000265174.1	0.89	RP11-358D17.1	ENSG00000249002.2	0.79	RPS24P17	ENSG00000243988.1	0.81	RN7SKP98	ENSG00000252879.1	0.92	RP11-229C3.4	ENSG00000249157.1	0.86	RP11-27P7.1	ENSG00000254775.1	0.99	RP11-20E23.1	ENSG00000233703.1	0.88	CCL21	ENSG00000137077.7	0.81
AF015720.3	ENSG00000230794.1	0.80	RP11-126O22.6	ENSG00000282299.1	0.75	AC007556.3	ENSG00000235321.1	1.00	ADH4	ENSG00000198099.8	0.91	RP11-366F6.2	ENSG00000229967.1	0.77	MINOS1P2	ENSG00000270714.1	0.94	RP11-156K13.2	ENSG00000253215.1	0.88	RP11-145O15.2	ENSG00000254491.1	0.79	PSG11	ENSG00000243130.7	0.81	CTD-2503O16.1	ENSG00000239517.1	0.92	RP11-94P14.1	ENSG00000259722.2	0.86	AC007403.3	ENSG00000223859.1	0.99	RP11-248E9.5	ENSG00000257912.1	0.88	AOC3	ENSG00000131471.6	0.81
RP11-165M1.2	ENSG00000260723.1	0.74	RP11-126O22.3	ENSG00000282501.1	0.75	TBC1D3P7	ENSG00000233014.1	1.00	IGLV7-35	ENSG00000253631.1	0.90	RNU5E-8P	ENSG00000200372.1	0.77	CYCSP39	ENSG00000260690.1	0.94	CTC-304I17.2	ENSG00000264791.1	0.88	RP11-19O2.1	ENSG00000250981.1	0.79	HMGN1P32	ENSG00000237589.1	0.81	RP13-582L3.4	ENSG00000258507.1	0.92	RNU1-77P	ENSG00000212170.1	0.86	RP11-710N8.3	ENSG00000270631.1	0.99	RPL29P28	ENSG00000232378.1	0.88	CCL19	ENSG00000172724.11	0.80
RP11-889D3.1	ENSG00000239991.1	0.74	HMX1	ENSG00000215612.6	0.74	RP11-667M19.4	ENSG00000257070.1	1.00	LINC01312	ENSG00000223586.5	0.86	AC093326.1	ENSG00000223985.1	0.77	LINC00254	ENSG00000281219.2	0.94	RP11-202D18.2	ENSG00000229458.2	0.86	DAOA	ENSG00000182346.17	0.79	CTD-2544M6.1	ENSG00000259199.1	0.81	RP11-84O12.2	ENSG00000213421.4	0.92	RN7SL675P	ENSG00000239580.3	0.86	RP4-753D4.2	ENSG00000227599.1	0.78	AC018832.1	ENSG00000228351.1	0.88	GPR182	ENSG00000166856.2	0.80
ATP8B5P	ENSG00000179766.17	0.73	IFITM5	ENSG00000206013.2	0.74	EIF4EP5	ENSG00000214366.4	1.00	MIR1289-1	ENSG00000221763.1	0.84	SLC25A15P4	ENSG00000273872.1	0.77	UBTFL10	ENSG00000255385.1	0.94	C17orf77	ENSG00000182352.8	0.86	MED15P3	ENSG00000226831.1	0.79	RP11-154H17.1	ENSG00000236948.1	0.81	NFU1P1	ENSG00000230757.1	0.92	SNORA70	ENSG00000201376.1	0.86	GHc-210E9.2	ENSG00000231643.4	0.74	RP11-415I12.1	ENSG00000240027.2	0.88	CMA1	ENSG00000092009.10	0.80
			SLC2A7	ENSG00000197241.3	0.74	RP11-525K10.2	ENSG00000261376.1	1.00	TAAR1	ENSG00000146399.1	0.82	RP11-529P9.1	ENSG00000251172.1	0.77	OR11I1P	ENSG00000232791.3	0.94	SLC6A2	ENSG00000103546.18	0.86	RP11-494I9.1	ENSG00000231011.1	0.79	RP11-432M8.19	ENSG00000250715.1	0.81	KRT18P24	ENSG00000226234.2	0.92	UBA52P7	ENSG00000241656.1	0.86	PRKX-AS1	ENSG00000236188.1	0.72	COX6CP4	ENSG00000270500.1	0.88	MS4A2	ENSG00000149534.8	0.79
			AC125238.3	ENSG00000233031.1	0.74	RPL5P15	ENSG00000240412.1	1.00	RNU6-327P	ENSG00000252079.1	0.82	CTD-2382H12.1	ENSG00000265101.1	0.77	U3	ENSG00000221400.2	0.94	DEFB132	ENSG00000186458.4	0.86	RP11-763K15.1	ENSG00000259170.1	0.79	RP11-168P6.2	ENSG00000271652.1	0.81	TBC1D3P7	ENSG00000233014.1	0.92	GS1-345D13.1	ENSG00000278388.1	0.86	HMGB4	ENSG00000176256.10	0.72	RP11-287D1.5	ENSG00000279201.1	0.88	GIMAP8	ENSG00000171115.3	0.79
			AP002856.5	ENSG00000231698.2	0.74	RFKP1	ENSG00000215802.3	1.00	RP5-991C6.2	ENSG00000219702.1	0.81	AP000235.3	ENSG00000244278.1	0.77	TMEM202	ENSG00000187806.7	0.94	SLC26A4	ENSG00000091137.11	0.85	RP4-576H24.5	ENSG00000271523.1	0.79	RP11-543F8.2	ENSG00000226990.1	0.81	RP11-829H16.2	ENSG00000213867.4	0.92	RP11-303G3.9	ENSG00000255253.1	0.86	RP11-510M2.5	ENSG00000260015.1	0.70	AC108448.3	ENSG00000234791.1	0.88	APLNR	ENSG00000134817.10	0.79
			SIGLEC31P	ENSG00000268847.1	0.74	PISRT1	ENSG00000281473.1	1.00	TRBV24OR9-2	ENSG00000215206.5	0.81	RP11-959I15.4	ENSG00000254249.1	0.77	LINC01344	ENSG00000228918.3	0.94	SHISA2	ENSG00000180730.4	0.82	RN7SL169P	ENSG00000242547.3	0.79	RP11-80F22.10	ENSG00000214581.4	0.81	RAB28P1	ENSG00000226108.2	0.92	RP11-407B7.3	ENSG00000276407.4	0.85	RP11-366M4.15	ENSG00000250430.1	0.70	AC109638.1	ENSG00000226860.1	0.88	CFAP52	ENSG00000166596.14	0.79
			RP11-72M10.4	ENSG00000255283.3	0.74	AC027119.1	ENSG00000229642.1	1.00	TMEM132B	ENSG00000139364.10	0.80	RN7SL807P	ENSG00000243125.3	0.77	RP11-567B20.2	ENSG00000229747.1	0.94	ODAM	ENSG00000109205.16	0.81	OR3B1P	ENSG00000237619.1	0.79	RP11-275O18.1	ENSG00000257609.1	0.81	OR1E3	ENSG00000142163.7	0.92	CHCHD3P1	ENSG00000236420.1	0.85	CTC-340I23.2	ENSG00000254163.1	0.70	PLA2G12AP2	ENSG00000225221.1	0.87	LINC01100	ENSG00000242107.2	0.79
			RP11-331O9.1	ENSG00000217160.2	0.74	DEFB136	ENSG00000205884.2	1.00	GP2	ENSG00000169347.16	0.78	RN7SL456P	ENSG00000242266.3	0.77	RP5-1061H20.3	ENSG00000240524.2	0.94	SLC26A4-AS1	ENSG00000233705.6	0.79	RP11-485C11.1	ENSG00000248637.1	0.79	RN7SL317P	ENSG00000242668.3	0.81	RP11-1036F1.1	ENSG00000225662.2	0.92	DEFB132	ENSG00000186458.4	0.85				RP11-548K12.10	ENSG00000224653.1	0.87	GIMAP7	ENSG00000179144.4	0.79
			DEFA9P	ENSG00000233238.1	0.74	OR7E106P	ENSG00000258550.1	1.00	RNU4-50P	ENSG00000201231.1	0.78	RP11-548K12.6	ENSG00000227015.1	0.77	GS1-124K5.7	ENSG00000244510.1	0.94	MUCL1	ENSG00000172551.10	0.78	RP11-751H17.1	ENSG00000265844.1	0.79	CTD-2272G21.1	ENSG00000249289.1	0.81	RPL5P26	ENSG00000230469.1	0.92	AC062016.3	ENSG00000235871.1	0.85				AP000949.1	ENSG00000225906.1	0.87	RP11-275N1.1	ENSG00000230109.1	0.79
			RPS27P27	ENSG00000244043.1	0.74	TPI1P4	ENSG00000225455.3	1.00	RNA5SP320	ENSG00000252072.1	0.78	RP3-406C18.1	ENSG00000236205.1	0.77	RP11-328K4.1	ENSG00000248740.5	0.94	GALR1	ENSG00000166573.5	0.78	DEFB128	ENSG00000185982.6	0.79	HNRNPA1P52	ENSG00000269119.1	0.81	RPS24P6	ENSG00000233158.1	0.92	TBCAP2	ENSG00000235829.1	0.84				RP11-356K22.1	ENSG00000274837.1	0.87	RP11-158I23.1	ENSG00000248607.1	0.79
			Metazoa_SRP	ENSG00000203573.4	0.74	PABPC1P2	ENSG00000198526.7	1.00	MIR765	ENSG00000211581.1	0.77	CTB-51E13.1	ENSG00000250322.2	0.77	RP11-565F4.1	ENSG00000270741.1	0.94	SLC38A8	ENSG00000166558.10	0.77	RP11-373E16.4	ENSG00000239739.1	0.79	CTD-2311M21.2	ENSG00000260266.1	0.81	RP11-597M17.1	ENSG00000253397.1	0.92	AACSP1	ENSG00000250420.8	0.84				OR5H7P	ENSG00000187900.4	0.87	PIGPP2	ENSG00000234204.1	0.79
			RP11-525K10.1	ENSG00000260706.5	0.74	RNU11	ENSG00000270103.3	1.00	SCARNA21	ENSG00000251866.1	0.77	CTD-2535I10.1	ENSG00000260289.1	0.77	TCEB1P17	ENSG00000232695.1	0.94	OR1B1	ENSG00000280094.1	0.76	CRTAC1	ENSG00000095713.13	0.78	SLC12A3	ENSG00000070915.9	0.81	RP11-265D19.7	ENSG00000271158.1	0.92	RP11-21I4.3	ENSG00000274813.1	0.83				RN7SL797P	ENSG00000242560.3	0.87	RP4-796I8.1	ENSG00000235292.1	0.79
			RP11-91I8.1	ENSG00000261627.1	0.74	AC008850.3	ENSG00000227836.1	1.00	C2orf91	ENSG00000205086.6	0.74	RP11-548K12.5	ENSG00000230271.1	0.77	WT1-AS_7	ENSG00000273908.1	0.94	RP11-359D24.1	ENSG00000242009.1	0.75	LINC01361	ENSG00000236268.5	0.78	PSG2	ENSG00000242221.8	0.81	RP11-104D3.2	ENSG00000236468.1	0.92	AP000696.2	ENSG00000231324.1	0.83				Metazoa_SRP	ENSG00000280914.1	0.87	XX-C2158C12.1	ENSG00000234986.1	0.79
			RAB28P1	ENSG00000226108.2	0.74	AC015977.6	ENSG00000225378.1	1.00	RP11-674N23.4	ENSG00000272788.1	0.72	OR6C5P	ENSG00000230307.1	0.77	IFNA12P	ENSG00000235108.1	0.94	NRG2	ENSG00000158458.19	0.75	PLN	ENSG00000198523.5	0.78	NLRP7	ENSG00000167634.12	0.81	AC005019.2	ENSG00000213875.3	0.92	CH17-132F21.5	ENSG00000281904.1	0.83				MTND1P12	ENSG00000225433.3	0.87	CTD-2547G23.2	ENSG00000259955.1	0.79
			LINC00374	ENSG00000232954.2	0.74	LINC00453	ENSG00000274766.1	1.00	MTCL1	ENSG00000168502.17	0.72	LINC01349	ENSG00000230402.2	0.77	MTCL1P1	ENSG00000226554.1	0.94	TRGC1	ENSG00000211689.6	0.74	RP11-481J2.2	ENSG00000260186.5	0.78	PSG7	ENSG00000221878.10	0.81	HNRNPA1P58	ENSG00000219582.2	0.92	RN7SL282P	ENSG00000243591.3	0.83				RP11-164N20.2	ENSG00000262651.1	0.87	LINC01477	ENSG00000261715.1	0.79
			RP11-23E10.5	ENSG00000262090.1	0.74	CTD-3149D2.3	ENSG00000269752.1	1.00	RP11-616M17.1	ENSG00000259257.1	0.72	RP11-351E7.1	ENSG00000254347.1	0.77	VN1R8P	ENSG00000219280.1	0.94	RP11-96D1.6	ENSG00000261469.1	0.74	OLFM3	ENSG00000118733.16	0.78	RN7SL810P	ENSG00000243035.3	0.81	NPM1P2	ENSG00000266227.1	0.92	LINC01384	ENSG00000237396.1	0.82				PNPLA4P1	ENSG00000235451.1	0.87	SDR42E1P1	ENSG00000273994.1	0.79
			RP11-25L5.2	ENSG00000249105.2	0.74	OR7E86P	ENSG00000248364.1	1.00	RP11-174O3.3	ENSG00000240661.1	0.70	TRBVB	ENSG00000241911.1	0.77	RN7SL343P	ENSG00000273717.1	0.94	AQP12B	ENSG00000185176.12	0.74	PDZRN3-AS1	ENSG00000239677.6	0.78	C17orf78	ENSG00000278505.4	0.81	RP11-383B24.3	ENSG00000213525.3	0.92	RP11-26N15.2	ENSG00000264790.1	0.82				AL807772.1	ENSG00000281047.1	0.87	RP11-347J14.8	ENSG00000224038.1	0.79
			RAB28P2	ENSG00000236825.2	0.74	RN7SL166P	ENSG00000275014.1	1.00	RP11-542B15.1	ENSG00000203585.3	0.70	RP11-64I5.1	ENSG00000280451.1	0.77	RN7SL640P	ENSG00000278825.1	0.94	RN7SL282P	ENSG00000243591.3	0.71	ACSBG1	ENSG00000103740.9	0.78	PSG10P	ENSG00000248257.7	0.80	RP11-467N20.7	ENSG00000278552.1	0.92	CTD-2124B20.3	ENSG00000265174.1	0.82				RP11-428O23.1	ENSG00000282738.1	0.87	RP11-1072N2.3	ENSG00000249792.1	0.79
			AC090696.2	ENSG00000232394.1	0.74	MIR1302-8	ENSG00000221269.1	1.00				RP11-13E5.2	ENSG00000237208.1	0.77	CTD-2119L1.1	ENSG00000254498.1	0.94	AC079988.3	ENSG00000236145.1	0.70	ACCSL	ENSG00000205126.2	0.78	RP11-629E24.2	ENSG00000266505.1	0.80	CFL1P4	ENSG00000213026.4	0.92	RP11-2K6.2	ENSG00000261743.1	0.81				RP3-481F12.1	ENSG00000231005.1	0.87	OR4F6	ENSG00000184140.5	0.79
			CTD-2008N3.1	ENSG00000250921.1	0.74	C16orf97	ENSG00000261190.5	1.00				GTF2IP8	ENSG00000276318.1	0.77	RP11-157E21.3	ENSG00000277576.1	0.94	FAM53B-AS1	ENSG00000233334.3	0.70	RP11-116D17.3	ENSG00000271579.1	0.78	CTC-479C5.6	ENSG00000263201.1	0.80	RP11-14K2.1	ENSG00000241932.1	0.92	CSF2RBP1	ENSG00000232254.1	0.80				RNU1-54P	ENSG00000252990.1	0.87	RP11-96J19.1	ENSG00000218261.1	0.79
			LINC01034	ENSG00000224933.2	0.74	SDCBPP2	ENSG00000247570.2	1.00				RP11-183K14.1	ENSG00000234748.1	0.77	RP1-81D8.3	ENSG00000224477.5	0.94				PHACTR3	ENSG00000087495.16	0.78	FAM25G	ENSG00000189090.7	0.80	RPL3P8	ENSG00000232199.1	0.92	AC007050.18	ENSG00000250261.1	0.80				RP11-1277H1.3	ENSG00000263337.1	0.87	AC074008.1	ENSG00000214484.3	0.79
			DEFA11P	ENSG00000234178.1	0.74	RP11-382B18.5	ENSG00000271333.1	1.00				AL590007.1	ENSG00000212049.1	0.77	OR5AL2P	ENSG00000255466.1	0.94				FBXO40	ENSG00000163833.7	0.78	PSG1	ENSG00000231924.9	0.80	RP5-988G15.1	ENSG00000216917.2	0.92	RP4-655C5.9	ENSG00000280850.1	0.80				SNORA17	ENSG00000212589.1	0.87	IQCF5-AS1	ENSG00000235455.1	0.79
			TPT1P2	ENSG00000228111.1	0.74	OR10G4	ENSG00000254737.1	1.00				CTD-2061E9.1	ENSG00000249785.1	0.77	RP11-89K22.1	ENSG00000258098.1	0.94				ANK2	ENSG00000145362.16	0.78	MYPN	ENSG00000138347.15	0.80	RAB28P2	ENSG00000236825.2	0.92	LINC01514	ENSG00000237579.2	0.79				RP11-554L12.2	ENSG00000257237.1	0.87	VN2R1P	ENSG00000174930.4	0.79
			AC005160.3	ENSG00000227658.1	0.74	AC083760.1	ENSG00000267716.1	1.00				RP11-368M16.5	ENSG00000237639.2	0.77	CTD-2313F11.3	ENSG00000248029.2	0.94				IQCA1	ENSG00000132321.16	0.78	RP11-390D11.1	ENSG00000261632.1	0.80	GPR32P1	ENSG00000269565.1	0.92	RP11-805F19.3	ENSG00000279042.1	0.79				RP11-22K10.1	ENSG00000258549.1	0.87	RP11-925D8.6	ENSG00000259671.1	0.79
			DPRXP7	ENSG00000271464.1	0.74	RP5-872K7.7	ENSG00000228604.3	1.00				RN7SKP218	ENSG00000222154.1	0.77	RN7SL764P	ENSG00000240317.3	0.94				ADGRB2	ENSG00000121753.12	0.78	LAIR2	ENSG00000167618.9	0.80	HMGN2P36	ENSG00000228901.3	0.92	RP11-810O3.2	ENSG00000270413.1	0.79				RNU1-49P	ENSG00000200338.1	0.87	RP13-60P5.2	ENSG00000232446.1	0.79
			RP11-364C11.3	ENSG00000256031.1	0.74	OR2T33	ENSG00000177212.3	1.00				RP11-69C17.2	ENSG00000226694.2	0.77	RN7SL462P	ENSG00000276522.1	0.94				ATP8B4	ENSG00000104043.14	0.78	PSG6	ENSG00000170848.15	0.80	RP11-220H4.2	ENSG00000225244.3	0.92	CTD-2350C19.5	ENSG00000263870.1	0.79				AC096559.2	ENSG00000223360.1	0.87	RP11-855C21.1	ENSG00000253104.1	0.79
			AC226150.3	ENSG00000255919.1	0.74	RNU12-2P	ENSG00000201659.1	1.00				AC025016.1	ENSG00000255257.1	0.77	RP11-812D23.1	ENSG00000257897.1	0.94				AC002486.3	ENSG00000223866.1	0.78	FAM25C	ENSG00000276430.2	0.79	RP11-227D2.3	ENSG00000225280.6	0.92	HTR2C	ENSG00000147246.9	0.78				RP11-626I20.2	ENSG00000257994.1	0.87	RP11-317J10.4	ENSG00000254380.1	0.79
			RP11-497G19.1	ENSG00000257883.1	0.74	SNORA38	ENSG00000200816.1	1.00				RP11-340I6.1	ENSG00000234387.1	0.77	OR13C4	ENSG00000148136.5	0.94				MYOZ2	ENSG00000172399.5	0.78	CTC-339O9.2	ENSG00000270347.1	0.79	RP11-58O3.2	ENSG00000254262.1	0.92	SLC9A3P2	ENSG00000238125.1	0.78				RP11-960H2.2	ENSG00000253413.1	0.87	HMGB1P29	ENSG00000250862.1	0.79
			DEFA5	ENSG00000164816.7	0.74	EEF1A1P40	ENSG00000231144.1	1.00				CTC-207P7.1	ENSG00000253331.1	0.77	RN7SL422P	ENSG00000274852.1	0.94				RP11-538I12.3	ENSG00000260922.1	0.78	RP11-293M10.1	ENSG00000258740.1	0.79	OR2T34	ENSG00000183310.3	0.92	RP11-70F11.2	ENSG00000242041.1	0.78				AC092944.1	ENSG00000280625.1	0.87	EEF1GP6	ENSG00000216518.1	0.79
			DEFA6	ENSG00000164822.4	0.74	RP11-500K19.1	ENSG00000243593.1	1.00				RP11-465K16.1	ENSG00000254383.1	0.77	DSCR10	ENSG00000233316.3	0.94				RD3L	ENSG00000227729.3	0.77	GPR32	ENSG00000142511.4	0.79	RPS19P6	ENSG00000234637.1	0.92	CTD-2199O4.4	ENSG00000280449.1	0.78				RN7SKP113	ENSG00000200761.1	0.87	RP11-511I11.2	ENSG00000270437.1	0.79
			RP11-1113C11.2	ENSG00000253160.1	0.74	RP5-837M10.4	ENSG00000228086.1	1.00				RP11-125N22.1	ENSG00000257933.1	0.77	AC105402.2	ENSG00000228848.3	0.94				FGF9	ENSG00000102678.6	0.77	NLRP10	ENSG00000182261.3	0.79	RP11-306I1.1	ENSG00000237783.2	0.92	SMPD4P1	ENSG00000223553.5	0.78				RNU1-98P	ENSG00000239023.1	0.87	RP11-136K7.3	ENSG00000253985.1	0.79
			CTD-2281E23.1	ENSG00000275427.1	0.74	RP11-476F14.1	ENSG00000226412.1	1.00				RNU1-5P	ENSG00000277234.1	0.77	PGAM4P2	ENSG00000248488.2	0.94				GRAMD4P8	ENSG00000270930.1	0.77	ART4	ENSG00000111339.10	0.78	RPL5P35	ENSG00000214727.2	0.92	RP11-897M7.3	ENSG00000280319.1	0.78				RP11-192C21.2	ENSG00000249847.1	0.87	RP11-32B5.5	ENSG00000258767.1	0.79
			TRIM51FP	ENSG00000219061.4	0.74	RP1-116K23.1	ENSG00000256763.1	1.00				ZNF92P1Y	ENSG00000215603.4	0.77	CLNS1AP1	ENSG00000213335.4	0.94				MCF2	ENSG00000101977.19	0.77	KCTD4	ENSG00000180332.6	0.78	SRP72P1	ENSG00000265182.1	0.92	RP11-442O1.4	ENSG00000278214.1	0.78				OR2F1	ENSG00000213215.3	0.87	RP11-79E3.2	ENSG00000250723.5	0.79
			KCNV1	ENSG00000164794.8	0.74	RP11-396C23.3	ENSG00000270598.1	1.00				SNORA70	ENSG00000206661.1	0.77	CTD-2350J17.1	ENSG00000250250.1	0.94				C1QTNF4	ENSG00000172247.3	0.77	SLC1A6	ENSG00000105143.12	0.78	HNRNPA1P19	ENSG00000218454.2	0.92	AC012362.3	ENSG00000213081.3	0.78				RP11-152O14.3	ENSG00000279779.1	0.87	RP11-852E15.1	ENSG00000236930.1	0.79
			CNPY1	ENSG00000146910.11	0.74	SNORA40	ENSG00000253047.1	1.00				Y_RNA	ENSG00000277604.1	0.77	RPL10P14	ENSG00000260031.1	0.94				LRRC39	ENSG00000122477.12	0.77	RP11-57B24.2	ENSG00000270842.1	0.78	EEF1A1P2	ENSG00000258841.1	0.92	UBTFL5	ENSG00000204705.3	0.78				TIMM9P3	ENSG00000232786.1	0.87	Pinc	ENSG00000278004.1	0.79
			RPL7AP33	ENSG00000254200.1	0.74	RP11-4N23.4	ENSG00000277935.1	1.00				A2ML1-AS2	ENSG00000256904.1	0.77	RP11-203P23.2	ENSG00000237606.2	0.94				CTSK	ENSG00000143387.12	0.77	AC064834.2	ENSG00000223466.1	0.78	PSMD7P1	ENSG00000266707.1	0.92	CTC-276P9.2	ENSG00000248753.1	0.78				IGLV2-28	ENSG00000253451.1	0.87	LIPT1P1	ENSG00000229975.1	0.79
			LINC01608	ENSG00000253877.5	0.74	FAM90A22P	ENSG00000215365.4	1.00				RP11-379J13.2	ENSG00000255502.5	0.77	RP11-1109M24.5	ENSG00000264956.1	0.94				PXDNL	ENSG00000147485.12	0.77	PSG5	ENSG00000204941.13	0.78	CH507-145C22.2	ENSG00000280019.1	0.92	RP11-394B2.7	ENSG00000279815.1	0.77				RP11-535C7.1	ENSG00000251040.1	0.87	CTD-2113L7.1	ENSG00000248969.1	0.79
			FAM90A27P	ENSG00000189348.6	0.74	RP11-146G7.2	ENSG00000263797.1	1.00				VN1R33P	ENSG00000227426.1	0.77	MARK2P12	ENSG00000229708.1	0.94				RP11-139G7.1	ENSG00000253340.1	0.77	DPRX	ENSG00000204595.1	0.78	CHCHD2P4	ENSG00000213118.4	0.92	LINC01103	ENSG00000234781.2	0.77				RP11-148M9.1	ENSG00000260237.1	0.87	RP11-147L13.7	ENSG00000267708.1	0.79
			RP11-93O17.1	ENSG00000249444.2	0.73	CTD-2515H24.1	ENSG00000240874.1	1.00				KRT43P	ENSG00000236473.1	0.77	RP11-297P16.3	ENSG00000251577.5	0.94				CHRDL1	ENSG00000101938.14	0.77	AC145676.2	ENSG00000249852.1	0.78	HNRNPA1P17	ENSG00000243188.1	0.92	IFNA6	ENSG00000120235.4	0.77				Y_RNA	ENSG00000207164.1	0.87	HMGB3P30	ENSG00000213652.3	0.79
			DEFA8P	ENSG00000223629.1	0.73	RP4-597N16.1	ENSG00000233018.1	1.00				MYCLP1	ENSG00000204053.6	0.77	LINC01231	ENSG00000236511.1	0.94				GPNMB	ENSG00000136235.15	0.77	CCDC105	ENSG00000160994.3	0.78	FCF1P6	ENSG00000225671.2	0.92	RHOXF1-AS1	ENSG00000258545.5	0.76				MIR1256	ENSG00000221808.1	0.87	RP11-625I7.1	ENSG00000249036.1	0.79
			TRPC5	ENSG00000072315.3	0.73	RP11-120J4.1	ENSG00000214657.4	1.00				NANOGP9	ENSG00000231809.4	0.77	CTD-2587H24.4	ENSG00000267110.1	0.94				SCN2B	ENSG00000149575.5	0.77	RP11-294L11.1	ENSG00000270677.1	0.78	EIF4EP5	ENSG00000214366.4	0.92	CH17-13I23.1	ENSG00000274927.1	0.76				RP11-812E19.13	ENSG00000270924.1	0.87	BNIP3P22	ENSG00000268174.1	0.79
			RP11-510C10.3	ENSG00000224149.1	0.73	RP3-416H24.4	ENSG00000258253.1	1.00				DUX4L18	ENSG00000259029.1	0.77	AC012363.13	ENSG00000235840.1	0.94				NIPAL4	ENSG00000172548.14	0.77	L1TD1	ENSG00000240563.1	0.78	RP11-346C16.4	ENSG00000219559.1	0.92	RP11-528M18.2	ENSG00000279798.1	0.75				RP11-437L7.1	ENSG00000260850.1	0.87	BNIP3P18	ENSG00000269055.1	0.79
			TACR3	ENSG00000169836.4	0.73	KIRREL3-AS1	ENSG00000257271.1	1.00				RNU1-6P	ENSG00000277344.1	0.77	IGKV1OR2-118	ENSG00000270999.1	0.94				OMG	ENSG00000126861.4	0.77	SEPT7P8	ENSG00000229000.1	0.77	TPI1P4	ENSG00000225455.3	0.92	RP11-354P17.15	ENSG00000261696.1	0.75				RP5-1051D14.2	ENSG00000278684.1	0.87	AL138479.3	ENSG00000231922.1	0.79
			CTD-2124B20.3	ENSG00000265174.1	0.73	AC006466.5	ENSG00000232887.1	1.00				MAGEA4	ENSG00000147381.11	0.77	FLJ46066	ENSG00000241098.1	0.94				TYRP1	ENSG00000107165.12	0.77	GATA3	ENSG00000107485.15	0.77	AD000091.3	ENSG00000267135.2	0.92	MSX2P1	ENSG00000229590.3	0.75				TRBV25OR9-2	ENSG00000240215.4	0.87	AC097463.1	ENSG00000226366.1	0.79
			RP11-497G19.2	ENSG00000257654.1	0.73	AC007016.3	ENSG00000249930.1	1.00				BAGE2	ENSG00000187172.15	0.77	LINC01210	ENSG00000239513.5	0.94				DCLK1	ENSG00000133083.14	0.77	CTD-2124B20.3	ENSG00000265174.1	0.76	RPL7P27	ENSG00000220069.1	0.92	C8orf59P1	ENSG00000226209.1	0.75				GNG5P1	ENSG00000213536.2	0.86	TRGVB	ENSG00000231202.1	0.79
			PMP2	ENSG00000147588.6	0.73	RP11-309N24.1	ENSG00000227313.1	1.00				RP11-615J4.3	ENSG00000239311.1	0.77	AC092071.1	ENSG00000269353.1	0.94				RP11-309L24.4	ENSG00000272899.2	0.76	RP11-318G21.4	ENSG00000233379.1	0.76	RN7SL607P	ENSG00000278525.1	0.92	CRYM	ENSG00000103316.10	0.75				CTD-2358C21.2	ENSG00000260472.1	0.86	RP11-404F10.6	ENSG00000275801.1	0.79
			AC079779.6	ENSG00000233684.2	0.73	RP11-343J18.1	ENSG00000228392.1	1.00				RP11-555K2.2	ENSG00000279783.1	0.76	CDY6P	ENSG00000229138.1	0.94				TSPAN10	ENSG00000182612.10	0.76	GPR32P1	ENSG00000269565.1	0.76	RP5-837I24.2	ENSG00000234953.2	0.92	PCDHA11	ENSG00000249158.6	0.75				RP11-598F17.2	ENSG00000271671.1	0.86	RP11-204N11.2	ENSG00000258379.1	0.79
			RGPD4	ENSG00000196862.9	0.73	CYCSP8	ENSG00000232503.1	1.00				ZNF734P	ENSG00000197990.6	0.76	R3HDM2P1	ENSG00000248735.2	0.94				RP11-13K12.5	ENSG00000267466.1	0.76	TTC21B-AS1	ENSG00000224490.5	0.76	SAP18P2	ENSG00000223873.1	0.92	RP11-13K12.1	ENSG00000267506.5	0.75				Metazoa_SRP	ENSG00000275222.1	0.86	RP3-455E7.1	ENSG00000220291.1	0.79
			RP11-520P18.5	ENSG00000261667.1	0.73	KB-1433G4.1	ENSG00000275905.1	1.00				OR4H6P	ENSG00000261277.2	0.76	GLT6D1	ENSG00000204007.6	0.94				ST8SIA2	ENSG00000140557.11	0.76	RP11-379F12.3	ENSG00000243350.1	0.76	RP11-138H8.3	ENSG00000259624.1	0.92	GRIA1	ENSG00000155511.17	0.74				RN7SL241P	ENSG00000239625.3	0.86	RP5-843L14.1	ENSG00000225657.2	0.79
			ZCCHC16	ENSG00000187823.3	0.73	RP11-93H10.1	ENSG00000263682.1	1.00				RP11-983G14.1	ENSG00000280709.2	0.76	SEC63P2	ENSG00000250416.2	0.94				KCNS2	ENSG00000156486.7	0.76	XAGE3	ENSG00000171402.14	0.76	ZNF877P	ENSG00000226875.1	0.92	RORA-AS2	ENSG00000259482.1	0.74				RP11-643N23.2	ENSG00000253845.1	0.86	RP4-735N21.1	ENSG00000233983.2	0.79
			LINC01419	ENSG00000253898.1	0.73	RP11-344F13.1	ENSG00000231606.1	1.00				ZNF733P	ENSG00000185037.9	0.76	AC091493.1	ENSG00000224039.1	0.94				RP11-467I17.1	ENSG00000261472.1	0.76	LINC00456	ENSG00000233124.1	0.75	ARHGAP42P1	ENSG00000227817.4	0.92	FOXO1B	ENSG00000214295.4	0.74				CTD-2517O10.5	ENSG00000250140.1	0.86	OR7E43P	ENSG00000249844.1	0.79
			TRIM51	ENSG00000124900.12	0.73	RP11-629E24.2	ENSG00000266505.1	1.00				GHc-210E9.2	ENSG00000231643.4	0.76	SCARNA17	ENSG00000252020.1	0.94				MYBPC1	ENSG00000196091.12	0.76	GATA3-AS1	ENSG00000197308.8	0.75	RP11-609L23.2	ENSG00000257405.1	0.92	RP11-21I4.2	ENSG00000253725.1	0.74				RP11-321E2.11	ENSG00000248205.1	0.86	C2orf27B	ENSG00000186825.5	0.79
			TAC1	ENSG00000006128.11	0.73	RP11-540N6.1	ENSG00000236303.2	1.00				OR4Q1P	ENSG00000258652.2	0.76	SCARNA17	ENSG00000252143.1	0.94				SLC35F1	ENSG00000196376.10	0.76	PRPF38AP1	ENSG00000225053.1	0.75	HSBP1P2	ENSG00000166530.8	0.92	TMEM38A	ENSG00000072954.6	0.74				MYO16-AS2	ENSG00000229938.1	0.86	RP11-6E9.4	ENSG00000249955.1	0.78
			RPS6KA2-AS1	ENSG00000231654.1	0.73	RP4-799G3.2	ENSG00000271399.1	1.00				RP11-548K12.13	ENSG00000271696.1	0.76	ZIM3	ENSG00000141946.1	0.94				CDH19	ENSG00000071991.8	0.76	CTB-167G5.6	ENSG00000268864.4	0.75	CCT6P4	ENSG00000232610.1	0.92	CH17-125A10.1	ENSG00000276756.4	0.73				CTD-2579N5.3	ENSG00000268296.1	0.86	GIMAP1-GIMAP5	ENSG00000281887.2	0.78
			GFRAL	ENSG00000187871.2	0.73	RPL23AP78	ENSG00000269244.1	1.00				MAGEA1	ENSG00000198681.6	0.76	OFD1P5Y	ENSG00000240438.2	0.94				KCNQ1DN	ENSG00000237941.2	0.76	E2F6P4	ENSG00000231513.3	0.75	RP11-795H16.3	ENSG00000267686.1	0.92	AC006380.3	ENSG00000231418.1	0.73				RN7SKP225	ENSG00000222337.1	0.86	AC003005.2	ENSG00000268266.1	0.78
			RP11-1029J19.2	ENSG00000259166.1	0.73	RP11-322L17.1	ENSG00000259148.1	1.00				OR11K1P	ENSG00000259324.1	0.75	VSTM2A-OT1	ENSG00000224223.1	0.94				MAPT-AS1	ENSG00000264589.1	0.76	RP11-654A16.1	ENSG00000259621.1	0.75	OR13C1P	ENSG00000235248.2	0.92	LINC01114	ENSG00000234177.5	0.73				RFPL4AP7	ENSG00000254268.1	0.86	ABCB1	ENSG00000085563.14	0.78
			RP11-152L20.3	ENSG00000260661.1	0.73	Metazoa_SRP	ENSG00000281698.1	1.00				LINC01055	ENSG00000235366.2	0.75	PRB4	ENSG00000230657.6	0.94				LINC01443	ENSG00000266554.1	0.76	AC008753.4	ENSG00000269564.1	0.74	UBE2V1P9	ENSG00000229667.2	0.92	VAC14-AS1	ENSG00000214353.7	0.73				ARL2BPP2	ENSG00000258071.1	0.86	RP11-542M13.3	ENSG00000268804.1	0.78
			LHX8	ENSG00000162624.14	0.72	RP11-134D3.2	ENSG00000261363.2	1.00				SSX5	ENSG00000165583.13	0.75	ETNPPL	ENSG00000164089.8	0.94				PRUNE2	ENSG00000106772.17	0.76	RP11-365O16.3	ENSG00000232628.5	0.74	RP11-86A5.1	ENSG00000233403.1	0.92	GH1	ENSG00000259384.6	0.73				RP11-50O21.1	ENSG00000260332.1	0.86	CPA3	ENSG00000163751.3	0.78
			RP11-171N4.1	ENSG00000251511.1	0.72	RP11-393I23.4	ENSG00000235038.1	1.00				C3orf30	ENSG00000163424.8	0.75	SFRP5	ENSG00000120057.4	0.94				AC108051.2	ENSG00000227680.1	0.76	RN7SKP202	ENSG00000222371.1	0.74	CTB-88F18.3	ENSG00000250956.1	0.92	TREX2	ENSG00000183479.12	0.73				MBD3L5	ENSG00000237247.5	0.86	RP11-794P6.1	ENSG00000255428.1	0.77
			TUBB8P4	ENSG00000250788.1	0.72	RP11-323H21.3	ENSG00000236687.1	1.00				NF1P9	ENSG00000281347.2	0.75	SBK2	ENSG00000187550.8	0.94				SGCG	ENSG00000102683.7	0.75	LEP	ENSG00000174697.4	0.74	WFDC9	ENSG00000180205.3	0.92	RP11-219E7.3	ENSG00000259130.1	0.73				RN7SKP178	ENSG00000201875.1	0.86	STAB2	ENSG00000136011.14	0.77
			RP11-432M8.16	ENSG00000248542.2	0.72	RP1-81D8.3	ENSG00000224477.5	1.00				WISP3	ENSG00000112761.18	0.75	AC112198.1	ENSG00000232517.2	0.93				KCNIP4	ENSG00000185774.14	0.75	RP11-379F12.4	ENSG00000232638.1	0.74	RPL21P127	ENSG00000243720.1	0.92	RP4-697K14.15	ENSG00000275812.1	0.73				RP11-361A23.3	ENSG00000257998.1	0.86	CTSG	ENSG00000100448.3	0.77
			ASTL	ENSG00000188886.3	0.72	RP11-545H22.1	ENSG00000251264.1	1.00				FLJ36000	ENSG00000276399.1	0.75	AC138517.4	ENSG00000249215.1	0.93				ABCB5	ENSG00000004846.16	0.75	RPS23P4	ENSG00000240992.1	0.74	AC015977.5	ENSG00000225024.1	0.92	KCND3-AS1	ENSG00000237556.1	0.72				GS1-115M3.4	ENSG00000270709.1	0.86	SPIC	ENSG00000166211.7	0.77
			TMEM249	ENSG00000261587.2	0.72	RP11-340I6.7	ENSG00000236299.7	1.00				BECN2	ENSG00000196289.7	0.75	IGLV11-55	ENSG00000211641.2	0.93				ASIC4	ENSG00000072182.12	0.75	HNRNPA1P1	ENSG00000218347.2	0.74	LINC00459	ENSG00000229307.1	0.92	BRINP3	ENSG00000162670.10	0.72				RP11-468N14.10	ENSG00000251498.1	0.86	KRT24	ENSG00000167916.4	0.77
			AC003986.5	ENSG00000229533.1	0.72	CTB-35F21.4	ENSG00000250692.1	1.00				NXF2B	ENSG00000269437.6	0.75	SORCS3	ENSG00000156395.12	0.93				OR7E110P	ENSG00000235623.2	0.75	LINC00370	ENSG00000223617.1	0.74	RP5-984P4.4	ENSG00000233492.1	0.92	RP11-520P18.5	ENSG00000261667.1	0.72				HIGD1AP4	ENSG00000233299.1	0.86	SEL1L2	ENSG00000101251.11	0.77
			LINC01105	ENSG00000232044.6	0.71	RP11-678G14.5	ENSG00000271182.1	1.00				NF1P2	ENSG00000258997.1	0.74	RP11-702C7.2	ENSG00000231388.1	0.93				TMEM229A	ENSG00000234224.2	0.75	RP11-762H8.3	ENSG00000259708.1	0.73	EIF4BP1	ENSG00000259019.1	0.92	AC009955.8	ENSG00000228973.1	0.72				RP11-529J17.1	ENSG00000265639.1	0.86	RP11-88L20.1	ENSG00000276828.1	0.77
			RBFOX1	ENSG00000078328.19	0.71	KLF8P1	ENSG00000260726.2	1.00				AL078471.5	ENSG00000273840.1	0.74	RP11-554D14.5	ENSG00000257392.1	0.92				RP11-13K12.1	ENSG00000267506.5	0.75	AC020956.3	ENSG00000278239.1	0.73	AC068538.2	ENSG00000204637.4	0.92	RN7SL132P	ENSG00000242653.3	0.72				OR10X1	ENSG00000186400.3	0.86	LINC00989	ENSG00000250334.5	0.77
			RP11-266N13.2	ENSG00000247345.2	0.71	RP11-1H8.1	ENSG00000261081.1	1.00				SERPINA11	ENSG00000186910.3	0.74	AC012454.4	ENSG00000203363.2	0.92				ADCY2	ENSG00000078295.15	0.75	ACTG1P21	ENSG00000232672.1	0.72	RP11-241J12.1	ENSG00000244630.2	0.92	CNN2P8	ENSG00000213355.3	0.72				RP11-432M8.14	ENSG00000248160.1	0.86	TEK	ENSG00000120156.20	0.77
			AC096669.1	ENSG00000225588.2	0.71	RP11-9H20.2	ENSG00000280365.1	1.00				RP11-14K3.4	ENSG00000261046.1	0.74	ST8SIA1	ENSG00000111728.10	0.91				PTGES3P5	ENSG00000234544.2	0.75	AC004070.1	ENSG00000231110.1	0.72	RP11-352E6.2	ENSG00000249780.1	0.92	CTA-299D3.8	ENSG00000281732.1	0.71				PRR20FP	ENSG00000271140.1	0.86	RP1-215K18.4	ENSG00000230781.1	0.77
			RP11-126O22.7	ENSG00000282697.1	0.71	CTD-2515C13.2	ENSG00000265980.1	1.00				MAGEC2	ENSG00000046774.9	0.74	EPHA8	ENSG00000070886.10	0.91				RP11-594N15.3	ENSG00000260398.1	0.74	RP11-364B14.1	ENSG00000233145.1	0.72	GAPDHP60	ENSG00000248180.1	0.92	HECW1-IT1	ENSG00000181211.1	0.71				RN7SL152P	ENSG00000242102.3	0.86	XCR1	ENSG00000173578.7	0.76
			AC018730.4	ENSG00000239587.1	0.71	RP11-491H9.3	ENSG00000219384.1	1.00				RP11-415I12.2	ENSG00000255583.2	0.74	C10orf126	ENSG00000204365.5	0.91				UBE2V1P9	ENSG00000229667.2	0.74	OR7A5	ENSG00000188269.8	0.72	AC092933.3	ENSG00000225770.1	0.92	MIR381HG	ENSG00000258861.1	0.71				RP11-643N23.1	ENSG00000253198.1	0.86	CA3	ENSG00000164879.6	0.76
			SP7	ENSG00000170374.5	0.71	RN7SKP137	ENSG00000223006.1	1.00				CCDC144NL	ENSG00000205212.3	0.74	PCYT1B	ENSG00000102230.13	0.91				RP5-1178H5.2	ENSG00000225417.1	0.74	TGFBR3	ENSG00000069702.10	0.72	NCR3	ENSG00000204475.9	0.91	PRAC2	ENSG00000229637.3	0.71				RP11-347L18.1	ENSG00000226739.1	0.85	CEL	ENSG00000170835.13	0.76
			RP11-436D23.1	ENSG00000271860.5	0.71	RARRES2P5	ENSG00000260967.1	1.00				MGC39584	ENSG00000280081.3	0.73	LHFPL3-AS2	ENSG00000225329.3	0.90				STEAP4	ENSG00000127954.12	0.74	TRIML2	ENSG00000179046.8	0.72	CRYBA1	ENSG00000108255.7	0.91	ZFP2	ENSG00000198939.7	0.71				RP11-359P18.8	ENSG00000253319.1	0.85	RP11-583F24.7	ENSG00000254529.1	0.76
			RP11-613G13.1	ENSG00000258758.1	0.71	OR7E39P	ENSG00000273252.1	1.00				TTTY2	ENSG00000212855.5	0.73	CLDN10-AS1	ENSG00000223392.1	0.90				COL25A1	ENSG00000188517.14	0.74	KRT24	ENSG00000167916.4	0.71	GRPR	ENSG00000126010.5	0.91	LINGO4	ENSG00000213171.2	0.70				RP11-506B6.5	ENSG00000216663.3	0.85	GIMAP1	ENSG00000213203.2	0.76
			FAM90A28P	ENSG00000269118.1	0.70	RP11-489M13.3	ENSG00000250940.1	1.00				RP5-1050E16.2	ENSG00000226206.1	0.73	RP11-573G6.4	ENSG00000279631.1	0.90				RHOBTB2	ENSG00000008853.16	0.74	CTD-2281E23.1	ENSG00000275427.1	0.71	SPATA16	ENSG00000144962.6	0.91	RP11-261B23.2	ENSG00000270955.1	0.70				RP11-223J6.1	ENSG00000271097.1	0.85	TRAV8-4	ENSG00000211790.2	0.76
			CHRM5	ENSG00000184984.9	0.70	RP1-140J1.1	ENSG00000229699.1	1.00				RP11-138J23.1	ENSG00000251026.1	0.73	CDC20B	ENSG00000164287.12	0.90				PDZRN3	ENSG00000121440.14	0.74	HSD3B1	ENSG00000203857.9	0.71	RPS4XP2	ENSG00000226948.1	0.90	RP11-442O1.3	ENSG00000275088.1	0.70				OR10X1	ENSG00000279111.1	0.85	TRBV12-5	ENSG00000275158.1	0.76
			NKX2-5	ENSG00000183072.9	0.70	RP11-124G5.2	ENSG00000255563.1	1.00				RP11-347J14.4	ENSG00000277024.1	0.73	RP1-251M9.2	ENSG00000231496.1	0.89				CTA-242H14.1	ENSG00000239622.1	0.74	PRG2	ENSG00000186652.9	0.71	RPL7P58	ENSG00000216938.3	0.90	RP11-411B10.5	ENSG00000267324.1	0.70				LINC01349	ENSG00000230402.2	0.85	RNU4-52P	ENSG00000206936.1	0.76
			RP11-702F3.3	ENSG00000255314.1	0.70	LINC01499	ENSG00000255171.5	1.00				RP11-341D18.6	ENSG00000279231.1	0.73	LHFPL3-AS1	ENSG00000226869.6	0.89				RP4-529N6.1	ENSG00000205444.2	0.74	GAPDHP14	ENSG00000236056.1	0.70	RPS15AP11	ENSG00000234093.3	0.90	AL593848.2	ENSG00000281114.1	0.70				RP11-475J5.8	ENSG00000270388.1	0.85	TUBA3E	ENSG00000152086.8	0.76
			EGFLAM	ENSG00000164318.17	0.70	RP11-359H3.1	ENSG00000244441.1	1.00				RP11-266N13.2	ENSG00000247345.2	0.72	TCP10	ENSG00000203690.11	0.89				POPDC2	ENSG00000121577.13	0.74	FAM25BP	ENSG00000273225.4	0.70	TPT1P9	ENSG00000234782.3	0.89	IGKV1OR2-118	ENSG00000270999.1	0.70				AC006227.1	ENSG00000229457.1	0.85	RP11-474D1.4	ENSG00000261650.1	0.75
						RP11-388K12.1	ENSG00000253960.1	1.00				RP11-11H9.2	ENSG00000280724.1	0.72	RP11-6B4.1	ENSG00000243694.2	0.88				TRIM63	ENSG00000158022.6	0.73	CYP3AP1	ENSG00000282277.1	0.70	RP11-598D14.1	ENSG00000249945.1	0.89	MED15P9	ENSG00000223760.4	0.70				AC009237.14	ENSG00000236026.1	0.85	RP11-357D18.1	ENSG00000250978.5	0.75
						RP1-140J1.4	ENSG00000230779.1	1.00				TPTE	ENSG00000274391.4	0.71	RP11-550H2.1	ENSG00000225605.1	0.88				RPL3P5	ENSG00000231546.1	0.73	CABP5	ENSG00000105507.2	0.70	RPL3P7	ENSG00000225093.1	0.89	RP11-1348G14.7	ENSG00000278528.1	0.70				snoU109	ENSG00000238410.1	0.85	TPSB2	ENSG00000197253.13	0.75
						RP3-425P12.5	ENSG00000229313.1	1.00				LINC00348	ENSG00000226846.1	0.71	SEMA3D	ENSG00000153993.13	0.88				OR4U1P	ENSG00000258899.1	0.73				RPS19P1	ENSG00000214612.3	0.89	SMIM18	ENSG00000253457.2	0.70				RP11-674C21.9	ENSG00000254804.1	0.85	RP11-567N4.2	ENSG00000248646.1	0.75
						ZKSCAN7P1	ENSG00000256138.1	1.00				CTC-513N18.6	ENSG00000269043.1	0.71	ADCY2	ENSG00000078295.15	0.88				CTD-2380F24.1	ENSG00000261195.1	0.73				RPL7P37	ENSG00000226646.1	0.88	AC107016.2	ENSG00000281110.1	0.70				RP3-416H24.4	ENSG00000258253.1	0.85	RP11-398J10.2	ENSG00000258489.3	0.75
						RP11-115A14.1	ENSG00000248200.2	1.00				TCEB1P4	ENSG00000232924.1	0.71	CTB-1I21.1	ENSG00000250284.1	0.88				FAM180B	ENSG00000196666.4	0.73				CHRNB3	ENSG00000147432.6	0.88	IFNA11P	ENSG00000231195.1	0.70				RP11-1082A3.1	ENSG00000258795.1	0.85	TPSAB1	ENSG00000172236.16	0.75
						AC013480.2	ENSG00000226398.1	1.00				RP11-244B22.7	ENSG00000260590.1	0.70	SLC22A25	ENSG00000196600.12	0.87				ASB14	ENSG00000239388.8	0.73				RPL37AP1	ENSG00000226243.1	0.88	AQP12B	ENSG00000185176.12	0.70				AF241725.4	ENSG00000234730.1	0.85	ABCG2	ENSG00000118777.10	0.75
						RN7SL508P	ENSG00000244112.3	1.00				RP11-1038A11.3	ENSG00000256417.1	0.70	RP11-818F20.4	ENSG00000257193.1	0.87				KCP	ENSG00000135253.13	0.73				RP11-79E3.1	ENSG00000239983.1	0.88							GLULP6	ENSG00000215043.2	0.85	LCN6	ENSG00000267206.5	0.74
						RP11-508M8.1	ENSG00000249365.1	1.00				FAM230C	ENSG00000279516.1	0.70	CTD-2313F11.1	ENSG00000240535.8	0.87				MAMDC2	ENSG00000165072.9	0.73				CTD-2184D3.1	ENSG00000242327.1	0.87							UBDP1	ENSG00000225797.2	0.85	RP11-459E5.1	ENSG00000253125.1	0.74
						RP1-67K17.4	ENSG00000237851.1	1.00				FAM230A	ENSG00000277870.4	0.70	RP11-407H12.8	ENSG00000229255.1	0.87				RP11-116D17.4	ENSG00000276308.1	0.73				AC009362.2	ENSG00000233287.1	0.87							RPS17P8	ENSG00000226242.1	0.85	CLEC9A	ENSG00000197992.6	0.74
						RP11-274B18.3	ENSG00000224025.2	1.00				AC013480.2	ENSG00000226398.1	0.70	OR2T10	ENSG00000184022.3	0.87				FAM74A7	ENSG00000277260.1	0.72				RPL34P27	ENSG00000232858.1	0.87							MTND5P8	ENSG00000230999.1	0.85	TRAV19	ENSG00000211799.3	0.74
						LACRT	ENSG00000135413.8	1.00				ZNF735	ENSG00000223614.4	0.70	CTD-2277K2.1	ENSG00000258882.1	0.86				CHCHD6	ENSG00000159685.10	0.72				RP11-134K1.2	ENSG00000212695.5	0.87							RP11-45H22.3	ENSG00000249016.1	0.85	TUBA3D	ENSG00000075886.10	0.74
						NAALADL2-AS1	ENSG00000225552.1	1.00							GZMAP1	ENSG00000249454.1	0.86				RP11-843A23.1	ENSG00000255084.1	0.72				RPL34P31	ENSG00000239223.3	0.87							SNRPGP6	ENSG00000205433.4	0.85	LINC00517	ENSG00000259091.1	0.74
						RP11-608O21.1	ENSG00000248515.1	1.00							CTB-161M19.2	ENSG00000250928.1	0.85				IDI2-AS1	ENSG00000232656.7	0.72				EIF4A2P4	ENSG00000224781.1	0.87							MIR381HG	ENSG00000258861.1	0.85	GIMAP6	ENSG00000133561.15	0.74
						RP11-136F16.2	ENSG00000257220.1	1.00							RPL31P50	ENSG00000231788.4	0.85				LYVE1	ENSG00000133800.8	0.72				RP11-69L16.5	ENSG00000220472.1	0.86							RP11-265D19.8	ENSG00000273988.1	0.84	RP11-316A16.1	ENSG00000257294.2	0.74

## Sheet: LINC01415
ACC Tumor			CHOL Tumor			COAD Tumor			KICH Tumor			KIRC Tumor			KIRP Tumor			LUAD Tumor			PAAD Tumor			READ Tumor			SKCM Tumor			STAD Tumor			TGCT Tumor			THYM Tumor			UVM Tumor
WASIR1	ENSG00000185203.11	0.92	ZBTB12P1	ENSG00000180610.10	0.75	CALCRL	ENSG00000064989.12	0.78	TCF4	ENSG00000196628.13	0.91	TCF4	ENSG00000196628.13	0.79	ADGRL4	ENSG00000162618.12	0.75	EBF3	ENSG00000108001.13	0.77	TCF4	ENSG00000196628.13	0.81	TCF4	ENSG00000196628.13	0.76	SYTL4	ENSG00000102362.15	0.77	CHRD	ENSG00000090539.15	0.81	CADPS2	ENSG00000081803.15	0.74	TCF4	ENSG00000196628.13	0.91	RP11-71L14.3	ENSG00000279693.1	0.89
U1	ENSG00000278099.1	0.92	CLOCK	ENSG00000134852.14	0.74	ADGRF5	ENSG00000069122.18	0.78	FLI1	ENSG00000151702.16	0.90	RHOJ	ENSG00000126785.12	0.76	PCDH12	ENSG00000113555.5	0.75	TCF4	ENSG00000196628.13	0.77	ARHGAP31	ENSG00000031081.10	0.78	PCDH18	ENSG00000189184.11	0.76	EBF2	ENSG00000221818.8	0.77	TSPY11P	ENSG00000238235.1	0.79	CLMP	ENSG00000166250.11	0.74	NFAT5	ENSG00000102908.20	0.89	RP11-545G3.2	ENSG00000276538.1	0.88
RP11-42F12.1	ENSG00000280397.1	0.92	PLXDC1	ENSG00000161381.13	0.74	PECAM1	ENSG00000261371.5	0.77	ENTPD1	ENSG00000138185.16	0.89	SHROOM4	ENSG00000158352.15	0.76	S1PR1	ENSG00000170989.8	0.75	RP11-944C7.1	ENSG00000258792.4	0.77	ZEB2	ENSG00000169554.16	0.77	ARHGAP28	ENSG00000088756.12	0.75	RP11-524D16__A.3	ENSG00000261295.1	0.77	AP003900.6	ENSG00000277693.1	0.79	STARD13	ENSG00000133121.20	0.74	WWTR1	ENSG00000018408.14	0.89	RP11-132F7.2	ENSG00000279427.1	0.88
CTA-212A2.4	ENSG00000279927.1	0.92	LINC00654	ENSG00000205181.5	0.73	CD93	ENSG00000125810.9	0.77	TSPAN18	ENSG00000157570.11	0.89	JAM3	ENSG00000166086.12	0.75	CDH13	ENSG00000140945.15	0.74	CYTL1	ENSG00000170891.10	0.77	RBMS3	ENSG00000144642.20	0.76	PDGFRA	ENSG00000134853.11	0.75	KIAA1462	ENSG00000165757.8	0.73	UGT3A2	ENSG00000168671.9	0.77	ARHGEF17	ENSG00000110237.3	0.74	SLC16A5	ENSG00000170190.15	0.89	RP11-626E13.1	ENSG00000235902.1	0.87
RP11-309H21.3	ENSG00000261642.1	0.92	CTD-2621I17.3	ENSG00000279794.1	0.71	TCF4	ENSG00000196628.13	0.77	PRDM1	ENSG00000057657.14	0.89	RAPGEF5	ENSG00000136237.18	0.75	CXorf36	ENSG00000147113.16	0.74	MEOX2-AS1	ENSG00000229108.1	0.77	CD93	ENSG00000125810.9	0.75	DLC1	ENSG00000164741.14	0.74	TEKT1	ENSG00000167858.12	0.73	SHH	ENSG00000164690.7	0.77	SPIN2A	ENSG00000147059.8	0.73	MYLIP	ENSG00000007944.14	0.88	AC007285.6	ENSG00000227014.5	0.87
RP11-805I24.1	ENSG00000261177.1	0.92	AC008993.2	ENSG00000282542.1	0.71	THBD	ENSG00000178726.6	0.77	ERG	ENSG00000157554.18	0.89	MEF2C	ENSG00000081189.13	0.74	CLEC14A	ENSG00000176435.6	0.74	RP11-887P2.5	ENSG00000258274.1	0.77	SLIT2	ENSG00000145147.19	0.75	FSTL1	ENSG00000163430.9	0.74	COLEC12	ENSG00000158270.11	0.73	RP11-32D4.1	ENSG00000275130.1	0.77	PCDH18	ENSG00000189184.11	0.73	LEPROT	ENSG00000213625.8	0.88	SCN7A	ENSG00000136546.13	0.87
CTA-212A2.3	ENSG00000279217.1	0.92	EPN2-AS1	ENSG00000235397.1	0.70	TEK	ENSG00000120156.20	0.76	CD93	ENSG00000125810.9	0.88	CDH13	ENSG00000140945.15	0.74	CDH5	ENSG00000179776.17	0.74	FAM9A	ENSG00000183304.10	0.77	QKI	ENSG00000112531.16	0.75	UNC5C	ENSG00000182168.14	0.73	RP11-299D14.2	ENSG00000254178.1	0.72	RNU6-1178P	ENSG00000252483.1	0.77	PLK2	ENSG00000145632.14	0.73	PRDM5	ENSG00000138738.10	0.88	LINC00620	ENSG00000224514.2	0.87
RP11-434D2.3	ENSG00000267075.1	0.92	AC007191.4	ENSG00000279407.1	0.70	COL4A1	ENSG00000187498.14	0.76	S1PR1	ENSG00000170989.8	0.88	KIAA0355	ENSG00000166398.12	0.74	TIE1	ENSG00000066056.13	0.73	HLX	ENSG00000136630.12	0.77	NHSL2	ENSG00000204131.8	0.74	VCAM1	ENSG00000162692.10	0.73	LAMA2	ENSG00000196569.11	0.72	SOX2OT_exon4	ENSG00000278026.1	0.77	CNN3	ENSG00000117519.15	0.72	CRIM1	ENSG00000150938.9	0.88	RMST_9	ENSG00000276398.1	0.87
AC104843.4	ENSG00000231139.1	0.92	NFXL1	ENSG00000170448.11	0.70	ADGRA2	ENSG00000020181.17	0.76	ST6GALNAC3	ENSG00000184005.10	0.88	ZEB1	ENSG00000148516.21	0.74	CD34	ENSG00000174059.16	0.73	RP11-454C18.1	ENSG00000241151.1	0.77	ECM2	ENSG00000106823.12	0.74	ITGA4	ENSG00000115232.13	0.73	DCN	ENSG00000011465.16	0.72	GS1-594A7.5	ENSG00000237539.1	0.77	SEMA3A	ENSG00000075213.10	0.72	PLSCR4	ENSG00000114698.14	0.87	FDX1P2	ENSG00000227054.1	0.86
HIST1H4L	ENSG00000275126.1	0.92				TRPC6	ENSG00000137672.12	0.76	SLFN11	ENSG00000172716.16	0.88	EFNB2	ENSG00000125266.6	0.73	APLNR	ENSG00000134817.10	0.73	AC002383.2	ENSG00000227863.2	0.77	AKAP2	ENSG00000241978.9	0.74	LAMA4	ENSG00000112769.18	0.73	CFAP52	ENSG00000166596.14	0.72	RP11-347H15.1	ENSG00000255442.1	0.76	RUNX1T1	ENSG00000079102.16	0.72	SIX4	ENSG00000100625.8	0.87	RP11-563K23.1	ENSG00000272619.1	0.86
RP11-211G23.1	ENSG00000259854.1	0.92				ADAMTS3	ENSG00000156140.8	0.76	ADGRL4	ENSG00000162618.12	0.87	SPARC	ENSG00000113140.10	0.73	ERG	ENSG00000157554.18	0.73	GS1-18A18.2	ENSG00000228735.1	0.77	OSTM1	ENSG00000081087.14	0.74	MAP3K3	ENSG00000198909.7	0.73	C2orf50	ENSG00000150873.11	0.71	RP11-513G11.4	ENSG00000225742.5	0.75	ARAP3	ENSG00000120318.15	0.72	SOAT1	ENSG00000057252.12	0.87	RP1-111D6.3	ENSG00000228408.5	0.86
EEF1A1P26	ENSG00000233167.1	0.92				COL4A2	ENSG00000134871.17	0.75	LDB2	ENSG00000169744.12	0.87	ERG	ENSG00000157554.18	0.73	GPR4	ENSG00000177464.4	0.72	RPS4XP15	ENSG00000240721.2	0.77	ARID5B	ENSG00000150347.14	0.73	OSMR	ENSG00000145623.12	0.73	ABI3BP	ENSG00000154175.16	0.71	CHL1-AS2	ENSG00000224318.5	0.75	SNCAIP	ENSG00000064692.18	0.72	LINC00235	ENSG00000277142.1	0.87	RP11-379L18.1	ENSG00000267746.1	0.86
CTD-2050I18.2	ENSG00000267599.1	0.92				ADAMTS1	ENSG00000154734.14	0.75	GIMAP6	ENSG00000133561.15	0.87	CTNNB1	ENSG00000168036.16	0.72	PCDH17	ENSG00000118946.11	0.72	CTB-32P11.1	ENSG00000253538.1	0.77	ZNF521	ENSG00000198795.10	0.73	PEAK1	ENSG00000173517.10	0.73	TCF4	ENSG00000196628.13	0.71	RP11-598D12.2	ENSG00000261197.1	0.75	HACE1	ENSG00000085382.11	0.71	JMY	ENSG00000152409.8	0.86	IFNWP2	ENSG00000237691.1	0.86
CTD-2535P7.1	ENSG00000262271.1	0.92				PDGFRA	ENSG00000134853.11	0.75	PREX2	ENSG00000046889.18	0.86	PDCL	ENSG00000136940.13	0.72	LINC00989	ENSG00000250334.5	0.72	CTD-2194L12.3	ENSG00000250032.1	0.77	ZEB1	ENSG00000148516.21	0.73	SLC24A3	ENSG00000185052.11	0.72	DCLK3	ENSG00000163673.6	0.70	PRSS53	ENSG00000151006.7	0.74	CD248	ENSG00000174807.3	0.71	NOTCH2	ENSG00000134250.17	0.86	MYOG	ENSG00000122180.4	0.86
RP11-359P18.7	ENSG00000254069.2	0.92				HEG1	ENSG00000173706.12	0.75	CLEC14A	ENSG00000176435.6	0.86	FLI1	ENSG00000151702.16	0.72	KDR	ENSG00000128052.8	0.72	RPL31P35	ENSG00000232612.1	0.77	HEG1	ENSG00000173706.12	0.73	TMTC1	ENSG00000133687.15	0.72	JAM2	ENSG00000154721.14	0.70	RP11-333B6.1	ENSG00000278988.1	0.74	SMAD1	ENSG00000170365.9	0.71	ARHGEF17	ENSG00000110237.3	0.86	OTOG	ENSG00000188162.10	0.86
SNORA11	ENSG00000261709.3	0.92				ADGRL2	ENSG00000117114.19	0.75	AQP1	ENSG00000240583.10	0.86	SNRK	ENSG00000163788.13	0.72	FLT1	ENSG00000102755.10	0.72	AJ239318.1	ENSG00000280108.1	0.77	ADGRF5	ENSG00000069122.18	0.73	GREM1	ENSG00000166923.10	0.72	WDR38	ENSG00000136918.7	0.70	TUBB2B	ENSG00000137285.9	0.73	PEAR1	ENSG00000187800.13	0.71	RP11-403I13.8	ENSG00000272419.5	0.86	AC092675.4	ENSG00000227987.1	0.86
RP5-859M6.1	ENSG00000228429.1	0.92				FSTL1	ENSG00000163430.9	0.75	GIMAP8	ENSG00000171115.3	0.86	PCDH17	ENSG00000118946.11	0.72	DLL4	ENSG00000128917.6	0.72	RP11-101E19.4	ENSG00000254118.1	0.77	GNB4	ENSG00000114450.9	0.73	TTC28	ENSG00000100154.14	0.72	DRC1	ENSG00000157856.10	0.70	SLC35G6	ENSG00000259224.2	0.73	TRIM62	ENSG00000116525.13	0.71	CTC-490E21.10	ENSG00000269843.1	0.86	CITF22-49D8.1	ENSG00000224715.1	0.86
LINC01280	ENSG00000224391.1	0.92				FAM101B	ENSG00000183688.4	0.75	ADCY4	ENSG00000129467.13	0.86	HMCN1	ENSG00000143341.11	0.72	BCL6B	ENSG00000161940.10	0.71	SAGE3P	ENSG00000277486.1	0.77	EPB41L2	ENSG00000079819.16	0.73	PRR16	ENSG00000184838.14	0.72	CFAP126	ENSG00000188931.3	0.70	MED15P7	ENSG00000234381.1	0.73	UNC5C	ENSG00000182168.14	0.71	RP11-776H12.1	ENSG00000226476.2	0.86	UNCX	ENSG00000164853.8	0.86
RPS3AP9	ENSG00000231022.1	0.92				KDR	ENSG00000128052.8	0.75	KIAA1462	ENSG00000165757.8	0.85	MYCT1	ENSG00000120279.6	0.72	MYCT1	ENSG00000120279.6	0.71	RP11-69A21.2	ENSG00000225396.5	0.77	SHROOM4	ENSG00000158352.15	0.73	HEG1	ENSG00000173706.12	0.72	RP11-424M24.5	ENSG00000262890.1	0.70	AP000473.6	ENSG00000237735.2	0.73	TCF4	ENSG00000196628.13	0.71	LINC00657	ENSG00000260032.1	0.85	RP11-30L3.2	ENSG00000266696.1	0.86
WFDC8	ENSG00000158901.11	0.92				MCAM	ENSG00000076706.14	0.75	COL15A1	ENSG00000204291.10	0.85	ETS1	ENSG00000134954.14	0.71	PTP4A2P2	ENSG00000254481.1	0.71	RP11-666E17.1	ENSG00000259035.1	0.77	CALCRL	ENSG00000064989.12	0.73	ARHGAP31	ENSG00000031081.10	0.72	FAM81B	ENSG00000153347.9	0.70	OTOP1	ENSG00000163982.5	0.73	RP11-21A7A.2	ENSG00000256824.1	0.71	CTD-2267D19.3	ENSG00000266208.1	0.85	AC083867.4	ENSG00000225559.1	0.86
RP3-358H7.1	ENSG00000225949.1	0.92				AFAP1L1	ENSG00000157510.13	0.75	APLNR	ENSG00000134817.10	0.85	CD93	ENSG00000125810.9	0.71	LDB2	ENSG00000169744.12	0.71	DRAXINP1	ENSG00000225574.1	0.77	CSGALNACT2	ENSG00000169826.7	0.73	PREX2	ENSG00000046889.18	0.71				LYG2	ENSG00000185674.9	0.73	NOTCH1	ENSG00000148400.9	0.71	MEIS3P1	ENSG00000179277.9	0.85	LINC01109	ENSG00000271167.1	0.86
HMGN2P38	ENSG00000231726.2	0.92				ZNF366	ENSG00000178175.11	0.74	A2M	ENSG00000175899.14	0.84	CDH5	ENSG00000179776.17	0.71	SLC10A6	ENSG00000145283.7	0.71	RP11-453O22.1	ENSG00000226211.1	0.77	NAV3	ENSG00000067798.13	0.73	TCF21	ENSG00000118526.6	0.71				AC005077.7	ENSG00000224273.1	0.72	DPY19L4	ENSG00000156162.16	0.71	CCDC144NL	ENSG00000205212.3	0.85	LINC-ROR	ENSG00000258609.2	0.86
RP11-966I7.4	ENSG00000274762.1	0.92				PCAT19	ENSG00000267107.6	0.74	BCL6B	ENSG00000161940.10	0.84	CXorf36	ENSG00000147113.16	0.71	ARHGEF15	ENSG00000198844.10	0.71	CCDC3	ENSG00000151468.10	0.77	PECAM1	ENSG00000261371.5	0.73	ADAMTS7	ENSG00000136378.14	0.71				RP11-709P2.1	ENSG00000227514.3	0.71	TNFRSF10D	ENSG00000173530.5	0.70	BMPR1A	ENSG00000107779.11	0.85	PGM5P4	ENSG00000225398.3	0.86
OR10G8	ENSG00000234560.3	0.92				STARD8	ENSG00000130052.13	0.74	RP11-92C4.6	ENSG00000270412.1	0.84	ANKRD50	ENSG00000151458.11	0.70	C3orf70	ENSG00000187068.2	0.70	ASIC2	ENSG00000108684.14	0.76	KCTD20	ENSG00000112078.13	0.72	RP11-212I21.3	ENSG00000279030.1	0.71				GFRA3	ENSG00000146013.10	0.71	RBFOX2	ENSG00000100320.22	0.70	MCFD2	ENSG00000180398.11	0.85	GABRA6	ENSG00000145863.10	0.85
SNRPCP13	ENSG00000249799.1	0.92				PCDH17	ENSG00000118946.11	0.74	CD79B	ENSG00000007312.12	0.84	FMNL3	ENSG00000161791.13	0.70	PTPRB	ENSG00000127329.14	0.70	ATP5F1P2	ENSG00000214342.2	0.76	FAM198B	ENSG00000164125.15	0.72	CNTN4	ENSG00000144619.14	0.71				PKIA-AS1	ENSG00000254266.5	0.70	CTBP2P8	ENSG00000234383.1	0.70	TMEM192	ENSG00000170088.13	0.85	RP11-54C4.2	ENSG00000270978.1	0.85
Metazoa_SRP	ENSG00000281834.1	0.92				COL15A1	ENSG00000204291.10	0.74	PECAM1	ENSG00000261371.5	0.83	HIP1	ENSG00000127946.16	0.70	ECSCR	ENSG00000249751.3	0.70	IL12A-AS1	ENSG00000244040.5	0.76	RECK	ENSG00000122707.11	0.72	ITPRIP	ENSG00000148841.15	0.71				ABCD1P4	ENSG00000225293.1	0.70	PDGFRB	ENSG00000113721.13	0.70	PTPN13	ENSG00000163629.12	0.85	TRDN	ENSG00000186439.12	0.85
RN7SL580P	ENSG00000240641.3	0.92				GPR4	ENSG00000177464.4	0.74	PROS1	ENSG00000184500.14	0.83	CEP68	ENSG00000011523.13	0.70	RP11-389C8.2	ENSG00000261269.1	0.70	BARHL2	ENSG00000143032.7	0.76	F13A1	ENSG00000124491.15	0.72	CAV1	ENSG00000105974.11	0.71							BTBD19	ENSG00000222009.8	0.70	B3GALNT1	ENSG00000169255.13	0.85	PCDH11X	ENSG00000102290.21	0.85
SMARCE1P4	ENSG00000253650.1	0.92				PREX2	ENSG00000046889.18	0.74	GPR4	ENSG00000177464.4	0.83	ITGA1	ENSG00000213949.8	0.70	P2RY1	ENSG00000169860.6	0.70	TCEAL7	ENSG00000182916.7	0.76	KIAA0355	ENSG00000166398.12	0.72	VSTM4	ENSG00000165633.12	0.71							ADAMTS10	ENSG00000142303.13	0.70	LPAR1	ENSG00000198121.13	0.85	RANBP3L	ENSG00000164188.8	0.85
RP11-166J22.1	ENSG00000249851.1	0.92				EHD3	ENSG00000013016.14	0.74	ROBO4	ENSG00000154133.14	0.83	SH2B3	ENSG00000111252.10	0.70	MMRN2	ENSG00000173269.13	0.70	LINC00598	ENSG00000215483.8	0.76	ERG	ENSG00000157554.18	0.72	FAT4	ENSG00000196159.11	0.71							FLRT1	ENSG00000126500.3	0.70	LCA5	ENSG00000135338.13	0.85	MIR217HG	ENSG00000226702.1	0.85
AC005786.3	ENSG00000266959.1	0.92				RP11-92C4.6	ENSG00000270412.1	0.74	CDH5	ENSG00000179776.17	0.83	SWAP70	ENSG00000133789.14	0.70				SAGE2P	ENSG00000198022.6	0.76	MPDZ	ENSG00000107186.16	0.72	LRRN4CL	ENSG00000177363.4	0.71							ZDHHC8	ENSG00000099904.15	0.70	QKI	ENSG00000112531.16	0.85	RP11-373I8.1	ENSG00000244382.1	0.85
RP11-325O24.5	ENSG00000260212.1	0.92				RHOJ	ENSG00000126785.12	0.74	ARHGEF15	ENSG00000198844.10	0.83	LRRC8C	ENSG00000171488.14	0.70				RP11-94B19.3	ENSG00000264212.1	0.76	CHSY1	ENSG00000131873.5	0.71	LTBP1	ENSG00000049323.15	0.71							EFNB2	ENSG00000125266.6	0.70	RP11-87H9.5	ENSG00000279456.1	0.85	RP11-807H17.1	ENSG00000227869.1	0.85
Metazoa_SRP	ENSG00000273986.1	0.92				PLVAP	ENSG00000130300.8	0.74	GIMAP1-GIMAP5	ENSG00000281887.2	0.83	ARHGAP31	ENSG00000031081.10	0.70				RP11-439I14.2	ENSG00000259859.1	0.76	PABPC4L	ENSG00000254535.3	0.71	KIRREL	ENSG00000183853.17	0.70							KCNT2	ENSG00000162687.16	0.70	EPB41L5	ENSG00000115109.13	0.84	ENKUR	ENSG00000151023.16	0.85
AC092839.4	ENSG00000234943.2	0.92				PCDH12	ENSG00000113555.5	0.74	APOLD1	ENSG00000178878.12	0.83	ARHGEF15	ENSG00000198844.10	0.70				RP11-542A14.1	ENSG00000254350.1	0.75	PTPRG	ENSG00000144724.18	0.71	DCHS1	ENSG00000166341.7	0.70							ROBO4	ENSG00000154133.14	0.70	ROCK2	ENSG00000134318.13	0.84	C11orf87	ENSG00000185742.6	0.85
OR10N1P	ENSG00000213181.2	0.92				TIE1	ENSG00000066056.13	0.74	IRAK3	ENSG00000090376.8	0.83	ZNF366	ENSG00000178175.11	0.70				RP11-439I14.1	ENSG00000260187.1	0.75	OSBPL8	ENSG00000091039.16	0.71	GUCY1A3	ENSG00000164116.16	0.70										MAP4K3	ENSG00000011566.14	0.84	KIAA1024	ENSG00000169330.8	0.85
MKRNP2	ENSG00000227154.3	0.92				S1PR1	ENSG00000170989.8	0.74	ITGA4	ENSG00000115232.13	0.83	FBXL7	ENSG00000183580.9	0.70				SCN5A	ENSG00000183873.15	0.75	DLC1	ENSG00000164741.14	0.71	GUCY1B3	ENSG00000061918.12	0.70										SALRNA1	ENSG00000258952.2	0.84	RP11-344E13.4	ENSG00000266369.1	0.85
RPL21P126	ENSG00000242320.2	0.92				PALM2-AKAP2	ENSG00000157654.17	0.74	CXorf36	ENSG00000147113.16	0.82	PLXNA2	ENSG00000076356.6	0.70				LINC00645	ENSG00000258548.5	0.75	DDR2	ENSG00000162733.16	0.71	ZEB1	ENSG00000148516.21	0.70										RP11-434D9.2	ENSG00000249894.1	0.84	TEX26-AS1	ENSG00000224743.6	0.84
RARRES2P10	ENSG00000260153.1	0.92				SELE	ENSG00000007908.15	0.74	SPRY1	ENSG00000164056.10	0.82	SEC14L1	ENSG00000129657.14	0.70				LINC01262	ENSG00000250739.1	0.75	MAP3K3	ENSG00000198909.7	0.71	ENTPD1	ENSG00000138185.16	0.70										PLXDC2	ENSG00000120594.16	0.84	PTN	ENSG00000105894.11	0.84
Metazoa_SRP	ENSG00000281884.1	0.92				GJA4	ENSG00000187513.8	0.73	CSF2RB	ENSG00000100368.13	0.82	CD34	ENSG00000174059.16	0.70				MEOX2	ENSG00000106511.5	0.74	SH2B3	ENSG00000111252.10	0.71	ZNF366	ENSG00000178175.11	0.70										FOXC1	ENSG00000054598.6	0.84	DACH1	ENSG00000276644.4	0.84
LINC01109	ENSG00000271167.1	0.92				CLMP	ENSG00000166250.11	0.73	RP11-690P14.4	ENSG00000269920.1	0.82							RN7SKP43	ENSG00000251982.1	0.74	PRKD3	ENSG00000115825.9	0.71	PALM2-AKAP2	ENSG00000157654.17	0.70										ZFHX3	ENSG00000140836.14	0.84	FOXG1	ENSG00000176165.9	0.84
RP11-269C4.1	ENSG00000240201.1	0.92				CD34	ENSG00000174059.16	0.73	FGD5	ENSG00000154783.10	0.82							RP11-248E9.5	ENSG00000257912.1	0.74	RP11-815J21.4	ENSG00000259367.1	0.70	AMPH	ENSG00000078053.16	0.70										KIAA1217	ENSG00000120549.15	0.84	CHRDL1	ENSG00000101938.14	0.84
RP13-297E16.5	ENSG00000234622.5	0.92				ENG	ENSG00000106991.13	0.73	MYCT1	ENSG00000120279.6	0.82							RP1-170O19.14	ENSG00000253508.1	0.74	ATG4C	ENSG00000125703.14	0.70	FAM101B	ENSG00000183688.4	0.70										SOCS6	ENSG00000170677.5	0.84	PLCE1	ENSG00000138193.14	0.84
RP11-665C14.1	ENSG00000248770.1	0.92				PPAPDC3	ENSG00000160539.4	0.73	LRRC70	ENSG00000186105.7	0.82							RP11-255M2.2	ENSG00000258773.1	0.74	PKD2	ENSG00000118762.7	0.70	SASH1	ENSG00000111961.16	0.70										SYDE2	ENSG00000097096.8	0.84	RP11-121E16.1	ENSG00000258100.1	0.83
IGHV3-16	ENSG00000211944.2	0.92				ADGRL4	ENSG00000162618.12	0.73	OIT3	ENSG00000138315.12	0.82							MIR181A1HG	ENSG00000229989.3	0.74	NR3C1	ENSG00000113580.14	0.70	SNED1	ENSG00000162804.13	0.70										LINC01359	ENSG00000226891.6	0.84	PRTFDC1	ENSG00000099256.18	0.83
RP3-428A13.1	ENSG00000230538.1	0.92				IL1R1	ENSG00000115594.11	0.72	MEOX1	ENSG00000005102.12	0.82							FBN2	ENSG00000138829.10	0.74	GAS7	ENSG00000007237.18	0.70	ATP8B2	ENSG00000143515.16	0.70										SBF2	ENSG00000133812.14	0.84	SPINK6	ENSG00000178172.6	0.83
LONRF2P2	ENSG00000233905.1	0.92				GIPC3	ENSG00000179855.5	0.72	RHOJ	ENSG00000126785.12	0.81							CRABP1	ENSG00000166426.7	0.74	SOCS5	ENSG00000171150.7	0.70	PXDN	ENSG00000130508.10	0.70										TMEM30B	ENSG00000182107.6	0.84	RP11-120J1.1	ENSG00000225472.1	0.83
RN7SKP261	ENSG00000222880.1	0.92				DAAM2	ENSG00000146122.16	0.72	CD1D	ENSG00000158473.6	0.81							RBPJP5	ENSG00000232239.2	0.74				RP11-710C12.1	ENSG00000271474.1	0.70										RP11-44F14.6	ENSG00000279722.1	0.84	SHC3	ENSG00000148082.9	0.83
AP002856.4	ENSG00000236129.1	0.92				CXorf36	ENSG00000147113.16	0.72	PCDH12	ENSG00000113555.5	0.81							RP11-285M22.1	ENSG00000265114.1	0.74				MMP2	ENSG00000087245.12	0.70										SKI	ENSG00000157933.9	0.84	TOX3	ENSG00000103460.16	0.83
AC104113.3	ENSG00000233847.1	0.92				HRH2	ENSG00000113749.6	0.72	HECW2	ENSG00000138411.10	0.81							RP11-272P10.3	ENSG00000223672.2	0.74				NID2	ENSG00000087303.16	0.70										RNF11	ENSG00000123091.4	0.84	LINC01170	ENSG00000253807.5	0.83
RP11-123N4.4	ENSG00000225078.2	0.92				FLT4	ENSG00000037280.15	0.72	KCNK5	ENSG00000164626.8	0.81							METTL21C	ENSG00000139780.7	0.74				ADAMTS3	ENSG00000156140.8	0.70										BMI1	ENSG00000168283.13	0.84	CTD-2378E21.1	ENSG00000267109.1	0.83
ATP5G1P6	ENSG00000214318.3	0.92				ARHGEF15	ENSG00000198844.10	0.72	ELMO1	ENSG00000155849.15	0.80							HOXA13	ENSG00000106031.7	0.74				VCL	ENSG00000035403.16	0.70										RP11-397A16.1	ENSG00000267284.1	0.84	CCDC172	ENSG00000182645.5	0.83
RP11-162O12.1	ENSG00000240159.1	0.92				GJA5	ENSG00000265107.2	0.72	ENG	ENSG00000106991.13	0.80							EMILIN3	ENSG00000183798.4	0.74				ITPR1	ENSG00000150995.17	0.70										ARHGEF12	ENSG00000196914.8	0.84	SEC14L3	ENSG00000100012.11	0.83
RP11-379J13.2	ENSG00000255502.5	0.92				TNC	ENSG00000041982.14	0.72	CALCRL	ENSG00000064989.12	0.80							RP11-5O23.2	ENSG00000279694.1	0.74				CDH11	ENSG00000140937.13	0.70										MIR2052HG	ENSG00000254349.5	0.84	RP11-404G16.2	ENSG00000244062.1	0.82
RP11-463J7.2	ENSG00000231175.1	0.92				ZEB2	ENSG00000169554.16	0.72	GIMAP4	ENSG00000133574.9	0.80							SCX	ENSG00000260428.2	0.73																ZFP37	ENSG00000136866.13	0.84	P2RY1	ENSG00000169860.6	0.82
AC005235.1	ENSG00000236653.1	0.92				LYVE1	ENSG00000133800.8	0.71	DCHS1	ENSG00000166341.7	0.80							RP11-255M2.1	ENSG00000258433.1	0.73																PRKAR1A	ENSG00000108946.14	0.84	SOWAHA	ENSG00000198944.5	0.82
RP11-941H19.3	ENSG00000253238.1	0.92				APLNR	ENSG00000134817.10	0.71	RP11-532F6.3	ENSG00000272463.1	0.80							RP11-654D12.3	ENSG00000257725.1	0.73																HIPK3	ENSG00000110422.11	0.84	GPX5	ENSG00000224586.6	0.82
RP11-720L2.2	ENSG00000265477.1	0.92				PXDN	ENSG00000130508.10	0.71	P2RY8	ENSG00000182162.9	0.80							RP11-234G16.4	ENSG00000275327.1	0.72																WDFY1	ENSG00000085449.14	0.84	OR5AC4P	ENSG00000251090.1	0.82
TSPY10	ENSG00000236424.7	0.92				NHSL2	ENSG00000204131.8	0.71	PTPRB	ENSG00000127329.14	0.80							CHORDC2P	ENSG00000259050.2	0.72																GLG1	ENSG00000090863.11	0.83	NCAN	ENSG00000130287.13	0.82
RP11-384F7.1	ENSG00000243276.5	0.92				PDPN	ENSG00000162493.16	0.71	MEF2C	ENSG00000081189.13	0.80							COL11A2	ENSG00000204248.10	0.72																FLRT2	ENSG00000185070.10	0.83	RP11-513G11.3	ENSG00000238097.1	0.82
RP11-296C13.1	ENSG00000254189.1	0.92				CLEC14A	ENSG00000176435.6	0.71	TIE1	ENSG00000066056.13	0.80							RP11-553K8.5	ENSG00000261573.1	0.72																FCHO2	ENSG00000157107.13	0.83	MEG3	ENSG00000214548.14	0.82
RP11-514D23.1	ENSG00000268532.1	0.92				NID1	ENSG00000116962.14	0.71	CD200	ENSG00000091972.18	0.80							KCNK2	ENSG00000082482.13	0.72																PCDH18	ENSG00000189184.11	0.83	SH3GL3	ENSG00000140600.16	0.82
Metazoa_SRP	ENSG00000280981.1	0.92				MMP19	ENSG00000123342.15	0.71	GIPC3	ENSG00000179855.5	0.79							SOX8	ENSG00000005513.9	0.72																ZNF791	ENSG00000173875.13	0.83	RP1-58B11.1	ENSG00000260972.1	0.82
AC013399.3	ENSG00000232723.1	0.92				CRISPLD2	ENSG00000103196.11	0.71	ETS1	ENSG00000134954.14	0.79							C11orf87	ENSG00000185742.6	0.72																PURA	ENSG00000185129.5	0.83	RP11-171L9.1	ENSG00000257165.5	0.82
CTD-2154B17.2	ENSG00000278865.1	0.92				F2RL3	ENSG00000127533.3	0.71	NOVA2	ENSG00000104967.6	0.79							ZFHX4-AS1	ENSG00000253661.1	0.71																RP11-734K2.4	ENSG00000270344.2	0.83	RP11-104H15.7	ENSG00000262880.1	0.81
CTD-2576F9.2	ENSG00000270017.1	0.92				CYYR1	ENSG00000166265.11	0.71	PIK3CG	ENSG00000105851.10	0.79							MPPED2	ENSG00000066382.16	0.71																SERINC1	ENSG00000111897.6	0.83	JAKMIP1	ENSG00000152969.16	0.81
CTA-390C10.9	ENSG00000272798.1	0.92				SHE	ENSG00000169291.9	0.71	BMX	ENSG00000102010.14	0.78							RP11-343B18.2	ENSG00000259676.1	0.71																ROBO1	ENSG00000169855.19	0.83	GLRA3	ENSG00000145451.12	0.81
RPL5P19	ENSG00000220553.1	0.92				KCNH1	ENSG00000143473.11	0.71	IGF2	ENSG00000167244.17	0.78							ARMC4	ENSG00000169126.15	0.71																POTEI	ENSG00000196834.11	0.83	NWD2	ENSG00000174145.7	0.81
RP11-542E6.3	ENSG00000225482.1	0.92				GUCY1B3	ENSG00000061918.12	0.71	NES	ENSG00000132688.10	0.78							RP11-425A6.5	ENSG00000273312.1	0.70																MEIS3P2	ENSG00000188013.6	0.83	GALNT15	ENSG00000131386.17	0.81
RP5-961K14.2	ENSG00000203262.3	0.92				PTGIR	ENSG00000160013.8	0.71	CD34	ENSG00000174059.16	0.78							SNURFL	ENSG00000173954.8	0.70																BACE1	ENSG00000186318.16	0.83	RP11-227H15.5	ENSG00000231748.1	0.81
RP11-444C12.1	ENSG00000231349.2	0.92				RHOQ	ENSG00000119729.10	0.71	PCAT19	ENSG00000267107.6	0.78							GABRR1	ENSG00000146276.11	0.70																GNG12-AS1	ENSG00000232284.7	0.83	ZNRF4	ENSG00000105428.5	0.81
AL109763.1	ENSG00000228708.1	0.92				THY1	ENSG00000154096.13	0.71	SLC10A6	ENSG00000145283.7	0.78							AC002486.2	ENSG00000231525.1	0.70																PARD6B	ENSG00000124171.8	0.83	ZNF536	ENSG00000198597.8	0.81
TMPRSS15	ENSG00000154646.8	0.92				RASSF2	ENSG00000101265.15	0.71	GIMAP7	ENSG00000179144.4	0.78							SLC8A3	ENSG00000100678.18	0.70																NRP1	ENSG00000099250.17	0.83	RP11-325L12.7	ENSG00000278737.1	0.81
SNX18P27	ENSG00000253418.1	0.92				STK32B	ENSG00000152953.12	0.71	C22orf34	ENSG00000188511.12	0.77																									ZBTB10	ENSG00000205189.11	0.83	BEST3	ENSG00000127325.18	0.81
RP11-234O6.2	ENSG00000249568.1	0.92				GPR176	ENSG00000166073.8	0.71	SH2D3C	ENSG00000095370.19	0.77																									ZNF484	ENSG00000127081.13	0.83	H2BFWT	ENSG00000123569.8	0.81
ASB5	ENSG00000164122.8	0.92				IL7R	ENSG00000168685.14	0.70	DISC1	ENSG00000162946.20	0.77																									HFE	ENSG00000010704.18	0.83	HKDC1	ENSG00000156510.12	0.81
MTTP	ENSG00000138823.12	0.92				ERG	ENSG00000157554.18	0.70	GRK5	ENSG00000198873.11	0.77																									RP11-276M12.1	ENSG00000259445.1	0.83	HTR1F	ENSG00000179097.5	0.81
MYOC	ENSG00000034971.14	0.92				NOVA2	ENSG00000104967.6	0.70	RP11-364P22.1	ENSG00000234111.6	0.77																									WHAMMP3	ENSG00000276141.4	0.83	MIR31HG	ENSG00000171889.3	0.81
RP11-706J10.2	ENSG00000270866.1	0.92				SDK1	ENSG00000146555.18	0.70	LHX6	ENSG00000106852.15	0.77																									ARHGAP29	ENSG00000137962.12	0.83	SHANK2-AS1	ENSG00000226627.1	0.80
RP11-40G16.1	ENSG00000219867.1	0.91				ECSCR	ENSG00000249751.3	0.70	PRR29	ENSG00000224383.7	0.77																									SEC62	ENSG00000008952.16	0.83	AC140912.1	ENSG00000261227.2	0.80
CNBD1	ENSG00000176571.11	0.91				LAMA4	ENSG00000112769.18	0.70	GVINP1	ENSG00000254838.5	0.77																									KLHL36	ENSG00000135686.12	0.83	DKK3	ENSG00000050165.17	0.80
OR10G9	ENSG00000236981.1	0.91				SEMA6B	ENSG00000167680.15	0.70	SOX17	ENSG00000164736.5	0.77																									RP11-25H12.1	ENSG00000249413.2	0.83	RP11-442J21.2	ENSG00000276527.1	0.80
OR10G7	ENSG00000182634.7	0.91				LZTS1	ENSG00000061337.15	0.70	ECSCR	ENSG00000249751.3	0.77																									NEDD4	ENSG00000069869.15	0.83	MYO3A	ENSG00000095777.14	0.80
LINC00349	ENSG00000231238.1	0.91				BCL6B	ENSG00000161940.10	0.70	IL3RA	ENSG00000185291.10	0.77																									EVI5	ENSG00000067208.14	0.83	RP11-209K10.2	ENSG00000259203.1	0.80
RGSL1	ENSG00000121446.17	0.91				MMRN2	ENSG00000173269.13	0.70	PPAP2A	ENSG00000067113.16	0.77																									SLC35A5	ENSG00000138459.8	0.83	CRABP1	ENSG00000166426.7	0.80
SP3P	ENSG00000225530.1	0.91				SH2D3C	ENSG00000095370.19	0.70	AOC3	ENSG00000131471.6	0.77																									AASS	ENSG00000008311.14	0.83	KSR2	ENSG00000171435.13	0.80
SLC38A4	ENSG00000139209.15	0.91				CDH5	ENSG00000179776.17	0.70	CYSLTR1	ENSG00000173198.5	0.77																									DPY19L4	ENSG00000156162.16	0.83	RP11-5O23.2	ENSG00000279694.1	0.80
RP11-60H5.1	ENSG00000260840.1	0.90				FLI1	ENSG00000151702.16	0.70	LZTS1	ENSG00000061337.15	0.77																									ERBB4	ENSG00000178568.13	0.83	FCGBP	ENSG00000275395.4	0.80
HNRNPA1P8	ENSG00000229251.3	0.90				FBN2	ENSG00000138829.10	0.70	ST8SIA4	ENSG00000113532.12	0.77																									PIK3C2A	ENSG00000011405.13	0.83	RP11-132J14.3	ENSG00000271484.1	0.80
HIST1H3I	ENSG00000275379.1	0.90				HTR2A	ENSG00000102468.10	0.70	ZNF366	ENSG00000178175.11	0.76																									TBC1D4	ENSG00000136111.12	0.83	CHAT	ENSG00000070748.17	0.80
RGS13	ENSG00000127074.14	0.90				ITGA5	ENSG00000161638.10	0.70	SHANK3	ENSG00000251322.7	0.76																									UGDH-AS1	ENSG00000249348.1	0.83	AC004947.2	ENSG00000233760.1	0.80
HSPA6	ENSG00000173110.7	0.90				ADAMTS4	ENSG00000158859.9	0.70	CYTL1	ENSG00000170891.10	0.76																									DVL3	ENSG00000161202.17	0.83	MC5R	ENSG00000176136.5	0.80
OR10G4	ENSG00000254737.1	0.90				FGF7	ENSG00000140285.9	0.70	NOSTRIN	ENSG00000163072.14	0.76																									AC073343.13	ENSG00000228010.5	0.83	CLRN1-AS1	ENSG00000239265.5	0.80
EYS	ENSG00000188107.13	0.90				ARHGAP31	ENSG00000031081.10	0.70	PDE2A	ENSG00000186642.15	0.76																									SGK3	ENSG00000104205.12	0.83	SORCS3	ENSG00000156395.12	0.80
RP11-12K22.1	ENSG00000250775.1	0.89				RGS18	ENSG00000150681.9	0.70	EDNRB	ENSG00000136160.14	0.76																									PRKAA2	ENSG00000162409.10	0.83	PTCHD1	ENSG00000165186.10	0.80
MOB1AP1	ENSG00000228241.1	0.89				CR1	ENSG00000203710.10	0.70	HHEX	ENSG00000152804.10	0.76																									RIC3	ENSG00000166405.14	0.83	RP11-368I23.3	ENSG00000272797.1	0.80
FAM60DP	ENSG00000253488.1	0.89				WISP1	ENSG00000104415.13	0.70	PPP1R16B	ENSG00000101445.9	0.76																									RBMS3	ENSG00000144642.20	0.82	ZIC3	ENSG00000156925.11	0.79
LINC00636	ENSG00000240423.1	0.89				COL8A1	ENSG00000144810.15	0.70	CLIC2	ENSG00000155962.12	0.76																									RP1-122P22.2	ENSG00000233895.1	0.82	RASSF9	ENSG00000198774.4	0.79
EMCN	ENSG00000164035.9	0.89				IL6ST	ENSG00000134352.19	0.70	CD302	ENSG00000241399.6	0.76																									CHRM3	ENSG00000133019.11	0.82	RP11-684N3.1	ENSG00000279090.1	0.79
ADAD1	ENSG00000164113.10	0.89				PRR16	ENSG00000184838.14	0.70	PLVAP	ENSG00000130300.8	0.76																									WWC2	ENSG00000151718.15	0.82	CTNNA2	ENSG00000066032.18	0.79
BMP5	ENSG00000112175.7	0.89							ACVRL1	ENSG00000139567.12	0.76																									TEAD1	ENSG00000187079.14	0.82	PDE8B	ENSG00000113231.13	0.79
RP3-399J4.4	ENSG00000270484.1	0.89							F2R	ENSG00000181104.6	0.75																									LINC01237	ENSG00000233806.7	0.82	KLHL14	ENSG00000197705.9	0.79

## Sheet: LINC01416
ACC Tumor			BRCA Tumor			CHOL Tumor			COAD Tumor			ESCA Tumor			GBM Tumor			KICH Tumor			MESO Tumor			PAAD Tumor			SARC Tumor			STAD Tumor			UCEC Tumor			UCS Tumor
AC016577.1	ENSG00000279646.1	1.00	ATP5LP6	ENSG00000267376.1	0.96	RP11-17A19.2	ENSG00000263677.1	0.99	RP11-883G14.4	ENSG00000260620.1	0.84	CTD-2034I4.2	ENSG00000259594.5	0.75	RP11-778D9.4	ENSG00000228205.1	0.80	SNAP25	ENSG00000132639.12	0.96	RP11-388G3.1	ENSG00000257976.1	0.79	AC022098.1	ENSG00000280483.1	0.80	PRR15	ENSG00000176532.3	0.73	OR4V1P	ENSG00000254841.1	0.81	GABRA4	ENSG00000109158.10	0.82	RP11-98D18.7	ENSG00000236940.1	0.83
OR7E106P	ENSG00000258550.1	1.00	Metazoa_SRP	ENSG00000277455.1	0.96	SMIM23	ENSG00000185662.8	0.99	RP11-498J9.2	ENSG00000229272.1	0.84	RPS2P25	ENSG00000241965.2	0.73	RP1-149L1.1	ENSG00000253809.1	0.76	C9orf135-AS1	ENSG00000225626.2	0.96	RPH3A	ENSG00000089169.14	0.70	LINC01076	ENSG00000225105.2	0.80	ADH7	ENSG00000196344.11	0.72	AC127383.1	ENSG00000229462.1	0.80	RP11-554L12.3	ENSG00000257586.1	0.77	LDHBP1	ENSG00000232662.2	0.82
AP000860.2	ENSG00000270323.1	1.00	RP11-121L11.3	ENSG00000249830.1	0.96	CTD-2545M3.8	ENSG00000268518.1	0.98	IGHVII-74-1	ENSG00000254134.1	0.84	RP11-232M24.1	ENSG00000242671.1	0.73	RARRES2P10	ENSG00000260153.1	0.76	BCAN	ENSG00000132692.18	0.96	AC087499.10	ENSG00000227685.1	0.70	LINC01538	ENSG00000266952.1	0.80	RP4-799D16.1	ENSG00000233755.1	0.72	OR52L1	ENSG00000183313.4	0.80	AC005510.3	ENSG00000278589.1	0.77	AC009263.2	ENSG00000234639.1	0.81
TRIM60P16	ENSG00000229909.1	1.00	CTD-2206N4.5	ENSG00000277426.1	0.96	U3	ENSG00000275900.1	0.97	RPSAP57	ENSG00000267524.1	0.84	AC004158.3	ENSG00000260664.2	0.73	RP11-352B15.2	ENSG00000260611.1	0.75	TMEM185AP1	ENSG00000235254.3	0.94	MTND2P4	ENSG00000230252.1	0.70	RP11-241G9.3	ENSG00000249295.1	0.80	ELFN2	ENSG00000243902.6	0.72	OR52E4	ENSG00000180974.3	0.80	AC087499.7	ENSG00000236504.2	0.77	OR2M1P	ENSG00000177233.2	0.81
RP11-10D7.5	ENSG00000253995.1	1.00	RP11-726G23.12	ENSG00000255497.1	0.96	RP5-1182A14.7	ENSG00000282740.1	0.97	BOLA3P2	ENSG00000267332.1	0.84	RP11-70D24.1	ENSG00000279378.1	0.73	RP11-267C16.1	ENSG00000227115.6	0.75	RP11-1406H17.1	ENSG00000269908.1	0.94	SIGLEC31P	ENSG00000268847.1	0.70	AC138472.6	ENSG00000267614.1	0.80	PLEKHA8	ENSG00000106086.18	0.71	RP11-313I2.5	ENSG00000255540.1	0.79	RP6-204F4.2	ENSG00000238223.1	0.77	RP11-151H2.1	ENSG00000260483.2	0.78
RP11-5N11.2	ENSG00000248624.1	1.00	RP11-567C20.3	ENSG00000233407.1	0.96	Metazoa_SRP	ENSG00000276713.1	0.96	CH507-42P11.1	ENSG00000274559.2	0.84	SMAD1-AS2	ENSG00000250582.1	0.72	LINC01602	ENSG00000205293.3	0.75	MAPK8IP2	ENSG00000008735.13	0.94	HPRT1P3	ENSG00000256752.1	0.70	TARS2P1	ENSG00000248104.1	0.80	KRT18P2	ENSG00000234439.1	0.71	C18orf63	ENSG00000206043.6	0.79	RP5-1180C18.1	ENSG00000223944.1	0.77	TRBV23OR9-2	ENSG00000229063.2	0.77
VPS26BP1	ENSG00000224895.1	1.00	UBL5P1	ENSG00000248418.2	0.96	FLJ42102	ENSG00000172900.11	0.94	RP11-955H22.2	ENSG00000256502.1	0.84	RP11-147G7.3	ENSG00000279349.1	0.72	GAGE2A	ENSG00000189064.8	0.75	NKAIN1	ENSG00000084628.9	0.93	RP13-619I2.2	ENSG00000258206.1	0.70	CTD-2008L17.2	ENSG00000206129.3	0.77	NIFKP2	ENSG00000251122.1	0.71	GVINP2	ENSG00000254781.1	0.79	RP11-703C10.1	ENSG00000250908.1	0.77	OR7E59P	ENSG00000250561.2	0.77
AC010761.14	ENSG00000267729.1	1.00	CTC-360J11.5	ENSG00000270293.1	0.96	SP8	ENSG00000164651.16	0.94	PSG9	ENSG00000183668.17	0.84	AC006195.2	ENSG00000238090.1	0.72	AC007557.4	ENSG00000231597.1	0.75	RELN	ENSG00000189056.13	0.93	RP11-382B18.5	ENSG00000271333.1	0.70	RP11-501O2.5	ENSG00000242440.1	0.73	CTC-281M20.1	ENSG00000204754.3	0.71	OR9G1	ENSG00000174914.1	0.78	DEFB136	ENSG00000205884.2	0.77	RP11-756P10.2	ENSG00000250626.2	0.76
RP11-87G24.3	ENSG00000267568.6	1.00	RP11-23A22.1	ENSG00000259608.1	0.96	RPL9P16	ENSG00000214676.4	0.93	ARL14EPL	ENSG00000268223.2	0.84	RP1-101G11.2	ENSG00000235485.1	0.72	LINC01566	ENSG00000259841.6	0.75	RP11-586D19.1	ENSG00000249896.1	0.93	CTD-2611O12.6	ENSG00000268593.3	0.70	RP11-223C24.2	ENSG00000251248.1	0.72	RP11-38F22.1	ENSG00000258220.1	0.71	RP11-29A19.2	ENSG00000282390.1	0.78	RP11-794P6.3	ENSG00000255208.1	0.77	RP11-626P14.2	ENSG00000257185.1	0.75
RP11-17P16.2	ENSG00000270257.1	1.00	RP11-598D12.2	ENSG00000261197.1	0.96	SLC36A2	ENSG00000186335.8	0.92	C8orf86	ENSG00000196166.3	0.84	KRT8P4	ENSG00000248231.1	0.72	RP11-231G15.1	ENSG00000248440.1	0.75	CTD-2104P17.1	ENSG00000231625.4	0.93	Metazoa_SRP	ENSG00000278554.1	0.70				RP11-798K23.1	ENSG00000250674.1	0.71	KCNIP4-IT1	ENSG00000280650.1	0.78	RP11-587H10.1	ENSG00000253371.1	0.77	RP11-789C1.2	ENSG00000251061.2	0.75
RN7SL502P	ENSG00000240733.3	1.00	RP11-75N6.3	ENSG00000271395.1	0.96	RP1-102G20.2	ENSG00000237249.1	0.92	RP11-374N7.2	ENSG00000279790.1	0.84	CTD-2623H2.7	ENSG00000268293.1	0.71	GS1-542M4.4	ENSG00000229012.1	0.75	RP11-586D19.2	ENSG00000251408.1	0.93	RP1-34B20.19	ENSG00000277720.1	0.70				RP11-155N3.4	ENSG00000275919.1	0.70	CUL4AP1	ENSG00000248139.2	0.78	CTC-459F4.8	ENSG00000267768.1	0.77	RP4-714D9.4	ENSG00000226952.1	0.75
AC007881.4	ENSG00000233870.1	1.00	ADAM5	ENSG00000196115.12	0.95	RN7SKP247	ENSG00000223026.1	0.92	LIPK	ENSG00000204021.3	0.83	NMD3P1	ENSG00000226342.1	0.71	Metazoa_SRP	ENSG00000275293.1	0.75	AC073043.1	ENSG00000232732.9	0.93	RP11-540O11.7	ENSG00000259463.1	0.70				LLNLF-136C3.1	ENSG00000277766.1	0.70	LINC01043	ENSG00000260343.1	0.77	RP11-69C17.4	ENSG00000231326.6	0.77	RP11-408E5.4	ENSG00000121388.5	0.75
PCED1CP	ENSG00000231254.2	1.00	RP11-61O11.1	ENSG00000275016.4	0.95	LINC01114	ENSG00000234177.5	0.92	ANXA8L1	ENSG00000264230.7	0.83	SNX6P1	ENSG00000267920.1	0.71	AC009517.2	ENSG00000224469.1	0.75	CHGA	ENSG00000100604.12	0.93	RN7SL111P	ENSG00000243510.3	0.70				HMGB1P15	ENSG00000238190.1	0.70	ECM1P2	ENSG00000249995.1	0.77	NDUFS5P4	ENSG00000251437.1	0.77	SNORA59B	ENSG00000266079.4	0.75
FLJ33581	ENSG00000230133.1	1.00	RP11-293G6__B.4	ENSG00000231582.2	0.93	TCF7L1-IT1	ENSG00000231134.1	0.91	PEX5L	ENSG00000114757.18	0.83	FAR1P1	ENSG00000235879.1	0.71	Metazoa_SRP	ENSG00000273846.1	0.75	RN7SL823P	ENSG00000263595.2	0.93	RN7SL117P	ENSG00000264192.1	0.70				RPL35AP22	ENSG00000235133.1	0.70	RP11-677O4.2	ENSG00000260759.1	0.77	BUB1P1	ENSG00000270778.1	0.77	CELP	ENSG00000170827.9	0.75
uc_338	ENSG00000278113.1	1.00	CTD-2200P10.3	ENSG00000266561.2	0.92	FAM217A	ENSG00000145975.13	0.91	MYH16	ENSG00000002079.12	0.82	ZNF99	ENSG00000213973.8	0.71	TEX28	ENSG00000278057.4	0.75	HNRNPA1P13	ENSG00000213568.4	0.93	RNA5SP37	ENSG00000202290.1	0.70				RP11-184E9.3	ENSG00000279671.1	0.70	RP11-432M8.9	ENSG00000249156.1	0.77	CTD-2568A17.8	ENSG00000268375.1	0.77	RP11-667M19.2	ENSG00000256603.1	0.74
RP11-1060J15.7	ENSG00000256504.2	1.00	RP11-150O12.2	ENSG00000253388.1	0.90	AC073465.3	ENSG00000226131.1	0.90	AF238380.8	ENSG00000220132.1	0.82	OR2L2	ENSG00000203663.3	0.70	RP11-234P3.4	ENSG00000237528.1	0.75	RP11-335E6.2	ENSG00000203605.3	0.93	Y_RNA	ENSG00000201988.2	0.70				RP11-788H18.1	ENSG00000257729.1	0.70	ACTR3BP3	ENSG00000260327.2	0.77	SNORA43	ENSG00000252461.1	0.77	CTC-420A11.2	ENSG00000260115.1	0.74
OR4K4P	ENSG00000258541.1	1.00	RP1-128O3.4	ENSG00000230248.1	0.87	RP11-154D17.1	ENSG00000233926.1	0.90	AY269186.1	ENSG00000223587.1	0.82	KRT8P50	ENSG00000260799.1	0.70	RN7SL229P	ENSG00000242811.3	0.75	RPSAP2	ENSG00000237425.1	0.93	UBE2WP1	ENSG00000234422.1	0.70				SLC6A19	ENSG00000174358.15	0.70	AC018731.3	ENSG00000236885.1	0.77	RP11-350D17.3	ENSG00000271369.1	0.77	SNORA59A	ENSG00000239149.1	0.74
RP11-428C19.4	ENSG00000255308.1	1.00	HCN4	ENSG00000138622.3	0.87	DCST2	ENSG00000163354.14	0.90	CTB-78F1.1	ENSG00000254187.1	0.81	RP11-369G6.2	ENSG00000268105.1	0.70	RP11-43P5.3	ENSG00000279666.1	0.75	AC006196.1	ENSG00000230173.1	0.93	BSNDP1	ENSG00000275048.1	0.70				RN7SL261P	ENSG00000277762.1	0.70	RP11-897M7.2	ENSG00000279388.1	0.77	SLC22A8	ENSG00000149452.15	0.77	CDX1	ENSG00000113722.16	0.74
LINC01187	ENSG00000249601.2	1.00	RP11-568G20.2	ENSG00000259601.2	0.87	PRRT4	ENSG00000224940.8	0.89	CST6	ENSG00000175315.2	0.81	HELLPAR	ENSG00000281344.1	0.70	RP11-1042B17.4	ENSG00000258764.1	0.75	RP11-95I16.2	ENSG00000227307.1	0.93	LZTS1-AS1	ENSG00000253733.3	0.70				FKBP14	ENSG00000106080.10	0.70	RP11-497J7.4	ENSG00000271088.1	0.77	DUSP27	ENSG00000198842.9	0.76	RP11-21B23.1	ENSG00000261393.1	0.74
AC011525.4	ENSG00000267465.6	0.99	RP11-184E9.3	ENSG00000279671.1	0.84	SHTN1	ENSG00000187164.17	0.89	WNT7A	ENSG00000154764.5	0.80	AC098973.1	ENSG00000229243.1	0.70	ST6GALNAC2P1	ENSG00000228902.1	0.75	AL121656.5	ENSG00000236854.1	0.93	RP11-542E6.3	ENSG00000225482.1	0.70				LINC00905	ENSG00000167459.16	0.70	CTA-992D9.9	ENSG00000279848.1	0.77	RNU4-4P	ENSG00000201458.1	0.73	KRTAP6-1	ENSG00000184724.5	0.74
C4orf51	ENSG00000237136.6	0.99	MTND1P17	ENSG00000228122.1	0.84	CTD-2090I13.3	ENSG00000242757.1	0.89	ACTBL2	ENSG00000169067.3	0.80	RP11-235P11.1	ENSG00000248423.1	0.70	AF001550.7	ENSG00000262983.1	0.75	KB-1460A1.3	ENSG00000253737.1	0.93	RPL23AP31	ENSG00000232625.1	0.70				RP11-177F15.1	ENSG00000231877.1	0.70	AC083760.1	ENSG00000267716.1	0.77	RP4-671O14.7	ENSG00000280011.1	0.73	RP11-339A11.1	ENSG00000235756.2	0.74
AC091729.8	ENSG00000226291.1	0.99	RP11-393N4.1	ENSG00000232601.1	0.83	RPL24P7	ENSG00000215016.2	0.89	IL20RB	ENSG00000174564.12	0.79	RN7SKP153	ENSG00000201896.1	0.70	GAGE12H	ENSG00000224902.5	0.75	OR7E122P	ENSG00000215160.2	0.93	RN7SL202P	ENSG00000266627.2	0.70				RP11-324H9.1	ENSG00000280049.1	0.70	GOLGA2P1	ENSG00000205333.5	0.77	HCG4P8	ENSG00000229142.1	0.73	BX255923.3	ENSG00000276462.1	0.74
AC131097.4	ENSG00000216921.7	0.98	RN7SKP140	ENSG00000223128.1	0.80	RP11-662J14.1	ENSG00000258418.1	0.89	FAM3C2	ENSG00000174028.6	0.79	OR8B1P	ENSG00000227737.2	0.70	RP1-232L24.2	ENSG00000218029.3	0.75	RN7SL835P	ENSG00000264250.2	0.93	RNA5SP175	ENSG00000201145.1	0.70				AP000998.2	ENSG00000227330.1	0.70	LA16c-4G1.3	ENSG00000233866.1	0.77	NDUFS5P6	ENSG00000255531.1	0.72	OXT	ENSG00000101405.3	0.74
RP11-456O19.3	ENSG00000267732.1	0.97	RN7SL783P	ENSG00000265885.2	0.78	CTD-2176I21.2	ENSG00000248733.1	0.89	FAM3C	ENSG00000196937.10	0.79	LL22NC03-22A12.9	ENSG00000237428.1	0.70	AP000472.3	ENSG00000227075.1	0.75	NOX3	ENSG00000074771.3	0.93	AC010240.3	ENSG00000229738.1	0.70				LRP6	ENSG00000070018.8	0.70	RP11-907D1.3	ENSG00000280070.1	0.77	RP11-351E7.1	ENSG00000254347.1	0.72	RP11-223I10.1	ENSG00000261829.1	0.73
RP11-927P21.7	ENSG00000272400.1	0.97	RP11-2N1.1	ENSG00000267269.1	0.76	RPL7P13	ENSG00000234253.1	0.89	RP11-213G6.2	ENSG00000254002.1	0.78	ZNF680P1	ENSG00000228014.1	0.70	RP11-1072N2.3	ENSG00000249792.1	0.75	CCDC166	ENSG00000255181.3	0.93	AC009963.5	ENSG00000237745.1	0.70				RP11-533N14.3	ENSG00000227139.1	0.70	RP11-361D14.2	ENSG00000261129.1	0.77	RP11-278L15.6	ENSG00000244503.1	0.72	AC017002.4	ENSG00000225744.1	0.73
RPL26P30	ENSG00000236264.4	0.95	OR6C76	ENSG00000185821.3	0.75	RN7SKP297	ENSG00000223202.1	0.89	LRAT	ENSG00000121207.11	0.78	RP11-108N13.1	ENSG00000218476.2	0.70	RP11-121J20.1	ENSG00000255714.1	0.75	ATP6V0E1P3	ENSG00000238038.1	0.93	PPIL1P1	ENSG00000237951.1	0.70							RP11-342F21.1	ENSG00000235901.2	0.77	OR7H2P	ENSG00000251261.4	0.71	C3orf49	ENSG00000163632.12	0.73
RN7SL674P	ENSG00000239899.3	0.94	RP1-288M22.1	ENSG00000219575.1	0.75	RPL5P20	ENSG00000218643.2	0.89	LINC00334	ENSG00000182586.7	0.78	HSPE1P20	ENSG00000257021.1	0.70	AGGF1P8	ENSG00000261752.1	0.75	MTND1P14	ENSG00000227225.1	0.93	RP11-343D2.11	ENSG00000249225.1	0.70							FECHP1	ENSG00000235534.1	0.77	RP11-867G2.5	ENSG00000233536.2	0.71	AC008937.2	ENSG00000237705.1	0.73
PHBP18	ENSG00000257885.1	0.93	RPL35AP21	ENSG00000229814.1	0.75	RPL3P5	ENSG00000231546.1	0.89	CPA4	ENSG00000128510.10	0.78	AC012594.1	ENSG00000231898.8	0.70	RP3-433F14.1	ENSG00000220340.1	0.75	KATNBL1P3	ENSG00000235422.1	0.93	MRPL2P1	ENSG00000257480.1	0.70							RP11-159D12.10	ENSG00000266290.1	0.77	OR1L3	ENSG00000171481.3	0.71	SCARNA14	ENSG00000252712.1	0.73
RP11-398M15.1	ENSG00000232212.1	0.92	RP11-560A15.6	ENSG00000280220.1	0.74	COX6CP10	ENSG00000238008.1	0.89	HOTAIR_4	ENSG00000274817.1	0.78	HNRNPA1P51	ENSG00000234491.1	0.70	KRTAP1-4	ENSG00000204887.4	0.75	KRT17P3	ENSG00000231870.4	0.93	RP11-691H4.4	ENSG00000267694.1	0.70							OR2L6P	ENSG00000232215.2	0.77	RP11-344B5.4	ENSG00000235007.2	0.71	RP11-116O11.2	ENSG00000249562.1	0.73
RP11-308N19.1	ENSG00000234323.5	0.92	Metazoa_SRP	ENSG00000214305.4	0.74	OR13Z1P	ENSG00000226653.2	0.89	ANXA8	ENSG00000265190.6	0.77	OR9I2P	ENSG00000186508.4	0.70	RP11-295P22.4	ENSG00000224567.2	0.75	AC007740.1	ENSG00000237750.2	0.93	SNORA62	ENSG00000202374.1	0.70							RP11-720D4.2	ENSG00000279341.1	0.77	PRSS48	ENSG00000189099.11	0.71	RP11-572H4.1	ENSG00000223421.1	0.73
CYP4F25P	ENSG00000224106.1	0.92	SMARCE1P4	ENSG00000253650.1	0.73	OR6Q1	ENSG00000172381.4	0.89	AC139143.2	ENSG00000230080.2	0.77				RP4-726N1.2	ENSG00000229262.1	0.75	AC067960.1	ENSG00000234455.1	0.93	RP11-2I17.4	ENSG00000260173.1	0.70							RP11-627D16.2	ENSG00000259509.2	0.76	RP11-281B1.2	ENSG00000236072.1	0.71	AC092687.3	ENSG00000236162.1	0.73
Metazoa_SRP	ENSG00000275362.1	0.91	AC006373.1	ENSG00000235431.1	0.70	OR7E23P	ENSG00000228433.1	0.89	THEG	ENSG00000105549.10	0.77				LINC01047	ENSG00000232225.6	0.75	RP11-26O3.1	ENSG00000261198.1	0.93	RP4-799P18.3	ENSG00000236244.1	0.70							RP11-932A10.1	ENSG00000259008.1	0.76	TMEM56-RWDD3	ENSG00000271092.5	0.70	RP11-618I10.4	ENSG00000251691.2	0.73
Metazoa_SRP	ENSG00000273846.1	0.91	TBC1D3P4	ENSG00000204471.3	0.70	AC007563.1	ENSG00000236295.1	0.89	RP11-688I9.2	ENSG00000255317.1	0.76				RPL14P5	ENSG00000225661.6	0.75	RP11-321E2.6	ENSG00000185041.5	0.93	U51244.2	ENSG00000228481.1	0.70							RP3-393P12.1	ENSG00000229968.1	0.76	RP11-178A10.3	ENSG00000279239.1	0.70	RP11-736I10.2	ENSG00000255331.1	0.73
CTRB1	ENSG00000168925.10	0.90				RP11-163G10.2	ENSG00000230116.1	0.89	TRBV30	ENSG00000237254.2	0.76				MTND3P6	ENSG00000242214.1	0.75	RPL30P7	ENSG00000244361.1	0.93	CYCSP53	ENSG00000234333.2	0.70							UBQLN4P2	ENSG00000226213.1	0.76	RP4-735C1.6	ENSG00000228420.1	0.70	SEPT14P24	ENSG00000231299.1	0.73
MRPL9P1	ENSG00000254305.1	0.90				LINC00608	ENSG00000236445.4	0.89	KRT7	ENSG00000135480.14	0.76				SUCLA2P2	ENSG00000233107.1	0.75	AC010240.3	ENSG00000229738.1	0.93	RP11-502F1.1	ENSG00000279606.1	0.70							OR4A16	ENSG00000181961.3	0.76				CTC-260E6.12	ENSG00000274612.1	0.73
MTND4P10	ENSG00000226663.2	0.89				RP11-335F8.2	ENSG00000213184.3	0.89	SIGLEC15	ENSG00000197046.11	0.75				FAM27L	ENSG00000178130.9	0.75	RP5-1107A17.2	ENSG00000262623.1	0.93	NUTF2P8	ENSG00000270654.1	0.70							OR51R1P	ENSG00000237272.1	0.76				RP11-142L1.3	ENSG00000240404.2	0.73
GS1-393G12.12	ENSG00000254690.1	0.89				HMGN2P32	ENSG00000213558.3	0.89	CAV2	ENSG00000105971.14	0.75				OR56A7P	ENSG00000255481.2	0.75	RP11-379L18.2	ENSG00000280406.1	0.93	RP11-794M8.2	ENSG00000267286.1	0.70							REXO1L6P	ENSG00000277422.1	0.76				SNORA43	ENSG00000281863.1	0.73
RP13-122B23.8	ENSG00000260996.1	0.89				ZNF847P	ENSG00000215812.5	0.89	MTND1P2	ENSG00000235646.1	0.75				AC021021.2	ENSG00000226488.1	0.75	AC004485.3	ENSG00000228944.1	0.93	MTND3P7	ENSG00000240824.1	0.70							MAPKAPK5P1	ENSG00000224498.1	0.76				RP11-925D8.3	ENSG00000259600.2	0.73
RP11-174N3.4	ENSG00000273870.1	0.87				RN7SKP232	ENSG00000222102.1	0.89	NTF6B	ENSG00000267685.2	0.75				RP11-382N13.4	ENSG00000260817.2	0.75	RP11-98E6.1	ENSG00000257287.1	0.93	RP1-209B9.2	ENSG00000277315.1	0.70							RP11-392L5.2	ENSG00000251345.2	0.76				RP11-64K10.1	ENSG00000259227.2	0.73
AC019206.1	ENSG00000279229.1	0.86				LINC00349	ENSG00000231238.1	0.89	RP11-706C16.8	ENSG00000253715.1	0.74				GAGE12E	ENSG00000216649.3	0.75	RP11-215E13.1	ENSG00000261156.6	0.93	RP11-738B7.1	ENSG00000242078.1	0.70							NXNP1	ENSG00000226693.1	0.76				TRIM51DP	ENSG00000255190.2	0.73
DLX2	ENSG00000115844.10	0.86				RP4-816N1.7	ENSG00000258092.1	0.89	MUC16	ENSG00000181143.15	0.74				RP11-977P2.1	ENSG00000256513.1	0.75	AC007881.4	ENSG00000233870.1	0.93	RP11-405F3.2	ENSG00000260438.1	0.70							RP11-397A16.3	ENSG00000267172.1	0.76				AF096876.1	ENSG00000259981.1	0.73
RP11-815J4.5	ENSG00000267478.1	0.86				RP11-98C1.2	ENSG00000272895.1	0.89	CTD-2015G9.2	ENSG00000261175.5	0.74				LINC01230	ENSG00000281769.1	0.75	RP11-573G6.2	ENSG00000233318.2	0.93	BUB3P1	ENSG00000227968.1	0.70							OR2W5	ENSG00000203664.6	0.76				OR52R1	ENSG00000279270.1	0.73
KRT42P	ENSG00000214514.7	0.85				RP4-697P8.3	ENSG00000232900.1	0.89	TRPV4	ENSG00000111199.10	0.73				AC004911.2	ENSG00000226592.1	0.74	LINC00229	ENSG00000234300.1	0.93	RP11-3N2.8	ENSG00000227035.1	0.70							RP11-403N16.4	ENSG00000279715.1	0.76				LINC00353	ENSG00000236176.2	0.73
RP11-728G15.1	ENSG00000256008.2	0.85				RP11-249L21.2	ENSG00000218872.1	0.89	CAV1	ENSG00000105974.11	0.73				TEX11	ENSG00000120498.13	0.74	Metazoa_SRP	ENSG00000273913.1	0.93	AL133247.3	ENSG00000270422.1	0.70							RP11-449O16.2	ENSG00000229711.1	0.76				RP11-454H13.1	ENSG00000243396.1	0.73
LINC00440	ENSG00000234660.1	0.85				CTC-384G19.1	ENSG00000249349.1	0.89	CNTNAP3	ENSG00000106714.17	0.72				RP11-1003J3.1	ENSG00000271101.1	0.74	IFNA7	ENSG00000214042.1	0.93	RP11-5P15.1	ENSG00000279256.1	0.70							GNL2P1	ENSG00000223893.1	0.76				HMGN2P13	ENSG00000241810.1	0.73
RP11-317G6.1	ENSG00000259589.2	0.85				RP11-552M6.1	ENSG00000280348.1	0.89	PCNPP3	ENSG00000213344.2	0.72				GAGE1	ENSG00000205777.17	0.74	RP11-672L10.5	ENSG00000264179.1	0.93	RP11-401H2.1	ENSG00000253664.1	0.70							RP11-388G3.1	ENSG00000257976.1	0.76				AC010894.5	ENSG00000237798.1	0.73
AC099684.1	ENSG00000228133.2	0.84				SLC25A51P1	ENSG00000220483.4	0.89	CTD-2287O16.3	ENSG00000268714.3	0.72				NBPF4	ENSG00000196427.13	0.74	CTB-164N12.1	ENSG00000253141.1	0.93	RP11-372E1.7	ENSG00000241592.1	0.70							RP11-542P2.2	ENSG00000280262.1	0.76				RN7SL717P	ENSG00000240302.3	0.73
RP11-386G11.5	ENSG00000257913.2	0.84				RP11-109M19.4	ENSG00000263241.1	0.89	IL1RAPL1	ENSG00000169306.9	0.72				OR4N1P	ENSG00000258564.1	0.74	RP11-33E24.3	ENSG00000217334.1	0.93	TPT1P3	ENSG00000241899.1	0.70							LDHAP1	ENSG00000251587.1	0.76				DEFB127	ENSG00000088782.4	0.73
RAB42P1	ENSG00000230997.5	0.84				AC004069.1	ENSG00000251473.2	0.89	RP3-416H24.1	ENSG00000257671.1	0.71				KLRC1	ENSG00000134545.13	0.74	CTD-3149D2.3	ENSG00000269752.1	0.93	HMGN1P13	ENSG00000249619.1	0.70							REXO1L1P	ENSG00000205176.3	0.76				ACTG1P19	ENSG00000237999.2	0.73
HSPA8P3	ENSG00000234788.1	0.84				AP000936.5	ENSG00000225236.1	0.89	NTNG1	ENSG00000162631.18	0.71				AC004870.5	ENSG00000214754.3	0.74	TUBB4BP3	ENSG00000237458.1	0.93	POLR3KP1	ENSG00000232647.1	0.70							OR4S2	ENSG00000174982.2	0.76				RP11-72I8.2	ENSG00000277770.1	0.73
GIPC3	ENSG00000179855.5	0.83				OR6V1	ENSG00000225781.1	0.89	KRTAP29-1	ENSG00000212658.1	0.71				KRT8P32	ENSG00000250221.1	0.74	SVOP	ENSG00000166111.9	0.93	ADAM6	ENSG00000271968.2	0.70							OR5BN1P	ENSG00000254848.1	0.76				RP11-104H15.9	ENSG00000262624.1	0.73
RP11-473E2.4	ENSG00000228877.2	0.83				CTD-2291D10.1	ENSG00000261615.6	0.89	AC021066.1	ENSG00000281415.1	0.71				SCGB3A2	ENSG00000164265.8	0.74	INA	ENSG00000148798.9	0.93	OR5G4P	ENSG00000255485.1	0.70							LL22NC03-22A12.9	ENSG00000237428.1	0.76				RP3-365O12.2	ENSG00000225730.1	0.73
OPN1MW	ENSG00000268221.5	0.83				RP11-159H22.1	ENSG00000242527.1	0.89	RP11-255G12.3	ENSG00000258808.1	0.71				GAGE12J	ENSG00000224659.2	0.74	NKX2-1-AS1	ENSG00000253563.2	0.93	CTD-3022G6.1	ENSG00000269877.1	0.70							C7orf62	ENSG00000164645.2	0.76				RP4-560B9.5	ENSG00000232261.1	0.73
RP5-1065J22.2	ENSG00000237349.1	0.82				KRTAP17-1	ENSG00000186860.4	0.89	RP11-25L3.1	ENSG00000278902.1	0.71				LINC00485	ENSG00000258169.1	0.73	NKX2-1	ENSG00000136352.17	0.93	RP4-614N24.1	ENSG00000234481.1	0.70							RP11-572H4.1	ENSG00000223421.1	0.76				RP11-521P1.1	ENSG00000265614.1	0.73
RP11-218F4.1	ENSG00000260019.1	0.82				OR13C3	ENSG00000204246.2	0.89	RP11-393K12.2	ENSG00000223581.1	0.70				RP11-680E19.1	ENSG00000254811.5	0.73	RP11-532N4.2	ENSG00000235535.7	0.93	GSTA5	ENSG00000182793.10	0.70							RP11-286B5.1	ENSG00000242417.1	0.76				AC073094.4	ENSG00000233082.1	0.73
AC020550.7	ENSG00000231699.1	0.82				RP11-436H11.1	ENSG00000242814.2	0.89	C4orf26	ENSG00000174792.10	0.70				PPP1R1AP2	ENSG00000261084.1	0.73	RP1-310O13.13	ENSG00000278012.1	0.93	RP11-331O9.4	ENSG00000217044.1	0.70							OR52A4P	ENSG00000205494.9	0.76				OR52R1	ENSG00000176937.9	0.73
RP11-252C15.1	ENSG00000254813.5	0.81				IQCF4	ENSG00000224792.6	0.89	PSCA	ENSG00000167653.4	0.70				LINC01517	ENSG00000232624.6	0.73	B3GALT1	ENSG00000172318.5	0.93	RP11-303G3.9	ENSG00000255253.1	0.70							BECN1P2	ENSG00000219669.1	0.76				RP11-76E12.1	ENSG00000197176.7	0.73
RP11-69M1.1	ENSG00000240739.1	0.80				RP11-560B16.5	ENSG00000254712.1	0.89	DKK1	ENSG00000107984.9	0.70				RP11-471M2.3	ENSG00000272046.1	0.73	SYT4	ENSG00000132872.11	0.93	RP11-527H14.6	ENSG00000265786.1	0.70							LINC01566	ENSG00000259841.6	0.76				TUBB8P3	ENSG00000250307.2	0.73
AL354828.1	ENSG00000279282.1	0.80				OR5G4P	ENSG00000255485.1	0.89							EBLN1	ENSG00000223601.2	0.73	ACTL6B	ENSG00000077080.9	0.93	TMSB4XP3	ENSG00000223437.1	0.70							LINC01450	ENSG00000232458.1	0.76				NDUFA4P2	ENSG00000236691.3	0.73
RP11-21M24.3	ENSG00000260635.1	0.80				RP11-417B4.3	ENSG00000229115.1	0.89							MIR3663HG	ENSG00000234474.2	0.73	ANKS1B	ENSG00000185046.18	0.93										RP11-166J5.1	ENSG00000249259.2	0.76				IGLV2-33	ENSG00000211656.3	0.73
HOXA11-AS	ENSG00000240990.9	0.79				ZNF123P	ENSG00000255259.2	0.89							RP13-895J2.2	ENSG00000256943.1	0.73	OPRM1	ENSG00000112038.17	0.93										RPL5P10	ENSG00000234067.1	0.76				RP11-67M9.1	ENSG00000254171.1	0.73
RP11-197K3.1	ENSG00000242290.2	0.79				GOLGA2P4	ENSG00000229608.1	0.89							RP11-143A12.3	ENSG00000250198.1	0.72	CTD-3032H12.1	ENSG00000259725.1	0.93										DOCK11P1	ENSG00000259000.1	0.76				RP11-21C4.5	ENSG00000253800.1	0.73
CTRB2	ENSG00000168928.12	0.79				RP1-67A8.3	ENSG00000234206.5	0.89							AP000289.6	ENSG00000226527.1	0.72	ADAMTS8	ENSG00000134917.9	0.93										OR51S1	ENSG00000176922.3	0.75				RP11-157P23.2	ENSG00000261307.1	0.73
RP11-532L16.1	ENSG00000213045.3	0.79				RPLP1P13	ENSG00000232163.2	0.89							BMS1P9	ENSG00000198312.4	0.72	XKR7	ENSG00000260903.2	0.93										MTND4P8	ENSG00000248548.1	0.75				SNORA80E	ENSG00000207475.1	0.73
RSU1P2	ENSG00000232554.8	0.78				AC103563.9	ENSG00000231062.1	0.89							AC008427.2	ENSG00000251583.1	0.72	CPLX2	ENSG00000145920.14	0.93										OR14J1	ENSG00000204695.3	0.75				RP11-482L11.1	ENSG00000254897.1	0.73
RP11-325O24.1	ENSG00000218187.2	0.78				C20orf181	ENSG00000279610.1	0.89							FREM3	ENSG00000183090.5	0.72	CHRNB2	ENSG00000160716.4	0.92										OR52K2	ENSG00000181963.5	0.75				RP11-1396O13.22	ENSG00000249443.1	0.73
AC079199.2	ENSG00000226117.1	0.78				RP11-597K23.1	ENSG00000259622.1	0.89							KCNK18	ENSG00000186795.1	0.71	LINC01088	ENSG00000249307.5	0.92										ZNF705G	ENSG00000215372.6	0.75				RP11-109M19.3	ENSG00000261904.1	0.73
PPP1R11P2	ENSG00000231765.1	0.78				AC139099.7	ENSG00000279143.1	0.89							RP11-244B22.5	ENSG00000261274.1	0.71	SCRT1	ENSG00000261678.2	0.92										OR6C5P	ENSG00000230307.1	0.75				RP11-741G21.1	ENSG00000230459.3	0.73
Z83001.1	ENSG00000228061.5	0.78				SNX33P1	ENSG00000267609.2	0.89							FCRLA	ENSG00000132185.16	0.71	KCNJ4	ENSG00000168135.4	0.92										CTB-164N12.1	ENSG00000253141.1	0.75				C9orf62	ENSG00000178243.4	0.73
PPIAL4E	ENSG00000271567.1	0.77				NF1P7	ENSG00000278143.1	0.89							MUC4	ENSG00000145113.21	0.71	AP3B2	ENSG00000103723.12	0.92										AC012361.1	ENSG00000236436.1	0.75				OR4K8P	ENSG00000266693.1	0.73
ADCY10	ENSG00000143199.17	0.77				MYL8P	ENSG00000229596.3	0.89							PCMTD1P2	ENSG00000260087.1	0.71	SPINK13	ENSG00000214510.9	0.92										ADAM24P	ENSG00000214607.2	0.75				IGLV2-34	ENSG00000253120.1	0.73
GATA5	ENSG00000130700.6	0.77				RPL35AP	ENSG00000234075.1	0.89							REXO1L8P	ENSG00000270971.2	0.70	RP11-74E22.4	ENSG00000261963.2	0.92										RPL38P3	ENSG00000244422.3	0.75				TMEM207	ENSG00000198398.2	0.72
CTD-2034I4.2	ENSG00000259594.5	0.77				RPEP6	ENSG00000257075.1	0.89							RP13-895J2.3	ENSG00000256542.2	0.70	SNAP25-AS1	ENSG00000227906.7	0.92										PHKBP1	ENSG00000226262.1	0.75				RP11-495P10.3	ENSG00000224481.1	0.72
CTD-2308G16.1	ENSG00000259377.1	0.75				RPL26P34	ENSG00000225404.2	0.89							AL133493.2	ENSG00000233922.2	0.70	FAM57B	ENSG00000149926.13	0.92										RP1-228P16.9	ENSG00000279840.1	0.75				RP11-778H2.1	ENSG00000256120.1	0.72
C16orf93	ENSG00000196118.11	0.75				AC005786.5	ENSG00000267231.1	0.89							CSH2	ENSG00000213218.9	0.70	SOD3	ENSG00000109610.5	0.92										ARHGAP42P3	ENSG00000235759.1	0.75				AC099684.1	ENSG00000228133.2	0.72
CTD-2061E9.1	ENSG00000249785.1	0.74				RP11-59E19.3	ENSG00000239288.1	0.89							RP11-400G3.5	ENSG00000276490.1	0.70	ARL9	ENSG00000196503.2	0.92										OR2M2	ENSG00000198601.2	0.75				C12orf80	ENSG00000257137.5	0.72
RP4-777L9.3	ENSG00000275728.1	0.73				RP11-383G6.4	ENSG00000242479.1	0.89							CH17-12M21.1	ENSG00000176183.8	0.70	LEFTY2	ENSG00000143768.11	0.92										EIF2AP4	ENSG00000227395.1	0.75				RP3-333B15.5	ENSG00000273838.1	0.72
RP4-803J11.2	ENSG00000237481.1	0.73				CTD-2206G10.2	ENSG00000249774.1	0.89							RP11-488I20.8	ENSG00000260958.2	0.70	JAKMIP1	ENSG00000152969.16	0.92										SLC25A5P3	ENSG00000213673.3	0.75				RP11-218I7.2	ENSG00000228739.1	0.72
DKFZP434A062	ENSG00000262075.3	0.72				MTCO1P4	ENSG00000253556.1	0.89							VN1R48P	ENSG00000237487.1	0.70	NEFM	ENSG00000104722.13	0.92										MTND6P16	ENSG00000249893.1	0.75				RP11-325O24.1	ENSG00000218187.2	0.72
HOXA11-AS1_6	ENSG00000278020.1	0.72				IQCF6	ENSG00000214686.4	0.89							RP4-745K6.1	ENSG00000227743.1	0.70	UNC13A	ENSG00000130477.14	0.92										RP11-953B20.2	ENSG00000254183.1	0.75				MS4A10	ENSG00000172689.1	0.72
F12	ENSG00000131187.9	0.72				AC016894.1	ENSG00000234624.2	0.89							NOVA1-AS1	ENSG00000257842.5	0.70	FST	ENSG00000134363.11	0.91										OR52E1	ENSG00000236621.3	0.75				RP11-598F7.3	ENSG00000256948.1	0.72
RPL23AP70	ENSG00000241052.1	0.72				RP11-358H18.3	ENSG00000254586.1	0.89							RP11-131J3.1	ENSG00000224698.1	0.70	HTR1D	ENSG00000179546.4	0.91										RP11-875H7.1	ENSG00000242568.1	0.75				CTD-3080P12.3	ENSG00000249201.2	0.72
RP11-474C8.5	ENSG00000257848.1	0.72				KRT8P1	ENSG00000258948.2	0.89							RP11-483I13.2	ENSG00000238122.1	0.70	CHRM4	ENSG00000180720.7	0.91										AC005518.2	ENSG00000230190.1	0.75				RP11-1217F2.15	ENSG00000234089.1	0.72
HOXA2	ENSG00000105996.6	0.71				RP11-552O4.1	ENSG00000263382.1	0.89							SMCP	ENSG00000163206.5	0.70	TMEM198	ENSG00000188760.10	0.91										MRPS18BP2	ENSG00000235232.1	0.75				URAD	ENSG00000183463.5	0.71
KIZ	ENSG00000088970.15	0.70				SLC22A6	ENSG00000197901.11	0.89							RN7SL547P	ENSG00000240584.3	0.70	RP11-490G2.2	ENSG00000259946.1	0.91										RPL7P48	ENSG00000187504.6	0.75				RP5-1121H13.1	ENSG00000223651.1	0.71
RP11-293A21.2	ENSG00000248340.2	0.70				AC096582.9	ENSG00000251378.1	0.89							RP11-80F22.15	ENSG00000260857.2	0.70	CDK5R2	ENSG00000171450.5	0.91										RP11-698E18.1	ENSG00000251588.2	0.75				AC108059.4	ENSG00000229173.1	0.71
RP11-329B9.1	ENSG00000229433.1	0.70				RP11-459A10.1	ENSG00000237730.1	0.89										KCNC3	ENSG00000131398.13	0.91										LINC01375	ENSG00000226159.1	0.75				CTB-3M24.2	ENSG00000280104.1	0.71
LL22NC03-27C5.1	ENSG00000278890.1	0.70				RP11-93K22.7	ENSG00000249869.1	0.89										MIR7-3HG	ENSG00000176840.11	0.91										OR4A5	ENSG00000221840.3	0.75				AC004112.7	ENSG00000236232.1	0.71
Z82214.3	ENSG00000236272.1	0.70				RP11-254F19.3	ENSG00000260340.1	0.89										RP11-272L13.3	ENSG00000269998.1	0.91										MPPE1P1	ENSG00000258990.2	0.75				DSTNP5	ENSG00000236681.1	0.71
C2orf50	ENSG00000150873.11	0.70				RP11-533K9.3	ENSG00000224245.1	0.89										CTD-3149D2.2	ENSG00000279300.1	0.91										RP11-475A13.2	ENSG00000259395.1	0.75				RP11-179B15.6	ENSG00000261076.1	0.71
RP11-395P13.4	ENSG00000250402.2	0.70				AP000438.4	ENSG00000256181.1	0.89										RP11-300E4.2	ENSG00000254238.1	0.91										AP000641.1	ENSG00000255403.1	0.75				RP11-57C19.6	ENSG00000224797.1	0.71
RP11-1055B8.4	ENSG00000262877.4	0.70				RP1-309K20.6	ENSG00000272897.5	0.89										GS1-72M22.1	ENSG00000272163.1	0.91										CEACAMP4	ENSG00000230681.1	0.75				RP11-490G2.2	ENSG00000259946.1	0.70
						TRIM26BP	ENSG00000236475.1	0.89										C4orf50	ENSG00000181215.12	0.91										LYPLA2P3	ENSG00000236604.1	0.75				NOVA1-AS1	ENSG00000257842.5	0.70
						RP11-48D4.2	ENSG00000253416.1	0.89										BHMT	ENSG00000145692.14	0.91										RP11-638L3.1	ENSG00000265533.1	0.75				COX5BP6	ENSG00000237082.1	0.70
						RP11-142I2.1	ENSG00000271022.1	0.89										INSM2	ENSG00000168348.3	0.91										RP11-378I6.3	ENSG00000277711.1	0.75				RP11-630D6.5	ENSG00000245928.2	0.70
						RN7SL316P	ENSG00000241631.3	0.89										SRRM4	ENSG00000139767.8	0.90										OR5K4	ENSG00000196098.2	0.75				XXbac-BPG32J3.19	ENSG00000250641.1	0.70
						CTB-50L17.2	ENSG00000267408.1	0.89										MIR137HG	ENSG00000225206.5	0.90										MTND4P27	ENSG00000230548.1	0.75				PRAMENP	ENSG00000197549.9	0.70
						RP11-606P2.1	ENSG00000177803.7	0.89										SULT4A1	ENSG00000130540.13	0.90										KRT18P42	ENSG00000214794.4	0.75				RP11-116D2.1	ENSG00000261012.2	0.70
						MTND6P18	ENSG00000227714.1	0.89										SEZ6	ENSG00000063015.19	0.90										USP17L6P	ENSG00000205946.1	0.75
						RP5-1180C18.1	ENSG00000223944.1	0.89										RP11-923I11.3	ENSG00000260122.1	0.90										RPL10AP3	ENSG00000215264.4	0.75

[truncated: 1 more sheets: LINC01443]
