# Supplementary material for: Long Intergenic Non-Coding RNAs of Human Chromosome 18: Focus on Cancers
Source: Biomedicines. 2024 Feb 28;12(3):544. doi: 10.3390/biomedicines12030544 (PMC10968066; doi:10.3390/biomedicines12030544)
Supplement: Supplementary file 1 [file biomedicines-12-00544-s001.zip › Table_S14_Ershov.xlsx]

## Sheet: Sorted by lincRNAs
Table S14. Pathways predicted for co-expressed genes in different cancer types
lincRNAs	Cancer types	All found pathways terms	adj. p-value
LINC00470	CHOL	mTOR signaling pathway	9.44418634231175E-06
LINC00470	CHOL	AMPK signaling pathway	0.0000570230818710779
LINC00470	CHOL	FoxO signaling pathway	0.000130103812730847
LINC00470	CHOL	p53 signaling pathway	0.000227105775110043
LINC00470	CHOL	Focal adhesion	0.000278592438896427
LINC00470	CHOL	Insulin signaling pathway	0.00028980234767712
LINC00470	CHOL	Pancreatic cancer	0.000410166720906832
LINC00470	CHOL	Human papillomavirus infection	0.000410166720906832
LINC00470	CHOL	Small cell lung cancer	0.000410166720906832
LINC00470	CHOL	Adherens junction	0.000410166720906832
LINC00470	CHOL	Chronic myeloid leukemia	0.000410166720906832
LINC00470	CHOL	Fc gamma R-mediated phagocytosis	0.000410166720906832
LINC00470	CHOL	ErbB signaling pathway	0.000528181758792262
LINC00470	CHOL	Cell cycle	0.000628593671463939
LINC00470	CHOL	Endometrial cancer	0.00293523623088355
LINC00470	CHOL	Gastric cancer	0.00311108235950558
LINC00470	CHOL	Hepatocellular carcinoma	0.00653399114437146
LINC00470	CHOL	Cellular senescence	0.00691609413376022
LINC00470	CHOL	Glioma	0.00701227793781403
LINC00470	CHOL	Colorectal cancer	0.00701227793781403
LINC00470	CHOL	MAPK signaling pathway	0.00781721447143796
LINC00470	CHOL	Endocrine resistance	0.00781721447143796
LINC00470	CHOL	Longevity regulating pathway	0.00806060102813677
LINC00470	CHOL	Regulation of actin cytoskeleton	0.00827431180354554
LINC00470	CHOL	Thyroid hormone signaling pathway	0.0095788198030766
LINC00470	CHOL	Bladder cancer	0.0095788198030766
LINC00470	CHOL	Platinum drug resistance	0.0095788198030766
LINC00470	KIRC	FoxO signaling pathway	2.95830344086811E-11
LINC00470	KIRC	MAPK signaling pathway	7.36959954804207E-11
LINC00470	KIRC	Cellular senescence	7.36959954804207E-11
LINC00470	KIRC	Adherens junction	2.67915861716021E-10
LINC00470	KIRC	AGE-RAGE signaling pathway in diabetic complications	2.03631690634753E-09
LINC00470	KIRC	Sphingolipid signaling pathway	1.41143269342626E-08
LINC00470	KIRC	AMPK signaling pathway	2.49111496387682E-08
LINC00470	KIRC	Prostate cancer	2.49111496387682E-08
LINC00470	KIRC	EGFR tyrosine kinase inhibitor resistance	2.49111496387682E-08
LINC00470	KIRC	Hippo signaling pathway	2.86818657764487E-08
LINC00470	KIRC	Human papillomavirus infection	3.01982693120066E-08
LINC00470	KIRC	Focal adhesion	1.11388961854591E-07
LINC00470	KIRC	mTOR signaling pathway	1.11388961854591E-07
LINC00470	KIRC	PI3K-Akt signaling pathway	1.25820253621221E-07
LINC00470	KIRC	Signaling pathways regulating pluripotency of stem cells	1.25820253621221E-07
LINC00470	KIRC	Longevity regulating pathway	2.90333338856058E-07
LINC00470	KIRC	Regulation of actin cytoskeleton	1.57152463197822E-06
LINC00470	KIRC	Rap1 signaling pathway	1.71788137139385E-06
LINC00470	KIRC	Neurotrophin signaling pathway	2.79951729810687E-06
LINC00470	KIRC	Pancreatic cancer	7.36774549687624E-06
LINC00470	KIRC	Relaxin signaling pathway	7.99842042353438E-06
LINC00470	KIRC	Endometrial cancer	8.67996140842105E-06
LINC00470	KIRC	Colorectal cancer	9.25155368646173E-06
LINC00470	KIRC	Renal cell carcinoma	0.0000116025778951066
LINC00470	KIRC	Glioma	0.000013104579241202
LINC00470	KIRC	Axon guidance	0.000015309439911858
LINC00470	KIRC	Insulin resistance	0.000015309439911858
LINC00470	KIRC	Gastric cancer	0.0000193197576889439
LINC00470	KIRC	Ras signaling pathway	0.0000193197576889439
LINC00470	KIRC	Cushing syndrome	0.0000308464303671857
LINC00470	KIRC	Small cell lung cancer	0.0000317733449758156
LINC00470	KIRC	TNF signaling pathway	0.000070664245316471
LINC00470	KIRC	ErbB signaling pathway	0.0000854841950056255
LINC00470	KIRC	Thyroid hormone signaling pathway	0.000103786472059403
LINC00470	KIRC	Chronic myeloid leukemia	0.000113901810174034
LINC00470	KIRC	Kaposi sarcoma-associated herpesvirus infection	0.000292840555841695
LINC00470	KIRC	Hepatocellular carcinoma	0.000321635071572853
LINC00470	KIRC	p53 signaling pathway	0.000523012513696657
LINC00470	KIRC	Parathyroid hormone synthesis, secretion and action	0.000523012513696657
LINC00470	KIRC	Cell cycle	0.00056625311559532
LINC00470	KIRC	Regulation of lipolysis in adipocytes	0.000568456694135481
LINC00470	KIRC	T cell receptor signaling pathway	0.000568456694135481
LINC00470	KIRC	Tight junction	0.000568456694135481
LINC00470	KIRC	Endocrine resistance	0.00056933296843758
LINC00470	KIRC	Non-small cell lung cancer	0.000787427025245386
LINC00470	KIRC	Prolactin signaling pathway	0.000787427025245386
LINC00470	KIRC	C-type lectin receptor signaling pathway	0.00107552213308135
LINC00470	KIRC	Insulin signaling pathway	0.00107552213308135
LINC00470	KIRC	HIF-1 signaling pathway	0.00135850013936584
LINC00470	KIRC	VEGF signaling pathway	0.00158793033244678
LINC00470	KIRC	Fc epsilon RI signaling pathway	0.00174690371357172
LINC00470	KIRC	Fc gamma R-mediated phagocytosis	0.00180094970481678
LINC00470	KIRC	Acute myeloid leukemia	0.00193186892940926
LINC00470	KIRC	Osteoclast differentiation	0.00251459049731636
LINC00470	KIRC	Gap junction	0.00293735918771294
LINC00470	KIRC	Apelin signaling pathway	0.00339893845774316
LINC00470	KIRC	Platinum drug resistance	0.00393057755332925
LINC00470	KIRC	Adipocytokine signaling pathway	0.00447721160283989
LINC00470	KIRC	Leukocyte transendothelial migration	0.00640590324666101
LINC00470	KIRC	Thyroid cancer	0.00664675500854598
LINC00470	KIRC	Ferroptosis	0.0074809632701814
LINC00470	KIRC	Estrogen signaling pathway	0.00816860812951708
LINC00470	KIRC	Glucagon signaling pathway	0.00816860812951708
LINC00470	KIRC	GnRH signaling pathway	0.00879536560807785
LINC00526	CHOL	Chronic myeloid leukemia	0.0000138476040570324
LINC00526	CHOL	Prostate cancer	0.0000138476040570324
LINC00526	CHOL	Insulin resistance	0.0000221087447135034
LINC00526	CHOL	MAPK signaling pathway	0.0000221087447135034
LINC00526	CHOL	Adherens junction	0.0000342053164375103
LINC00526	CHOL	TNF signaling pathway	0.0000655332753371074
LINC00526	CHOL	AMPK signaling pathway	0.0000948157119242317
LINC00526	CHOL	Gastric cancer	0.0000948157119242317
LINC00526	CHOL	EGFR tyrosine kinase inhibitor resistance	0.0000948157119242317
LINC00526	CHOL	Cellular senescence	0.000312906877489287
LINC00526	CHOL	Axon guidance	0.000312906877489287
LINC00526	CHOL	Pancreatic cancer	0.000454136685833836
LINC00526	CHOL	Insulin signaling pathway	0.000548239675301291
LINC00526	CHOL	Endocrine resistance	0.000548239675301291
LINC00526	CHOL	mTOR signaling pathway	0.000641803441081219
LINC00526	CHOL	Colorectal cancer	0.000713385983840944
LINC00526	CHOL	Regulation of actin cytoskeleton	0.000713385983840944
LINC00526	CHOL	Glioma	0.000806295213028237
LINC00526	CHOL	FoxO signaling pathway	0.00101063429407734
LINC00526	CHOL	Focal adhesion	0.00161148287725716
LINC00526	CHOL	Acute myeloid leukemia	0.00161148287725716
LINC00526	CHOL	Hippo signaling pathway	0.00177581284009685
LINC00526	CHOL	Relaxin signaling pathway	0.00177637591576537
LINC00526	CHOL	Signaling pathways regulating pluripotency of stem cells	0.0017809402734519
LINC00526	CHOL	Hepatocellular carcinoma	0.00182610518016438
LINC00526	CHOL	Longevity regulating pathway	0.00184583359788124
LINC00526	CHOL	Endometrial cancer	0.00245249386466224
LINC00526	CHOL	HIF-1 signaling pathway	0.00375087209509303
LINC00526	CHOL	Renal cell carcinoma	0.00375087209509303
LINC00526	CHOL	Human papillomavirus infection	0.00440112995564734
LINC00526	CHOL	Neurotrophin signaling pathway	0.00461257231389497
LINC00526	CHOL	Prolactin signaling pathway	0.00501988155021692
LINC00526	CHOL	ErbB signaling pathway	0.00566447876447681
LINC00526	CHOL	Parathyroid hormone synthesis, secretion and action	0.0057188453698317
LINC00526	CHOL	Breast cancer	0.00620464302239422
LINC00526	CHOL	Type II diabetes mellitus	0.00649843989206706
LINC00526	CHOL	Hedgehog signaling pathway	0.00649843989206706
LINC00526	CHOL	Non-small cell lung cancer	0.00659452190493647
LINC00526	CHOL	Small cell lung cancer	0.00659452190493647
LINC00526	CHOL	AGE-RAGE signaling pathway in diabetic complications	0.00659452190493647
LINC00526	CHOL	Platinum drug resistance	0.00686635427984558
LINC00526	CHOL	Circadian rhythm	0.0073630180161861
LINC00526	CHOL	Sphingolipid signaling pathway	0.0091679310749263
LINC00526	CHOL	Ras signaling pathway	0.00975065329249725
LINC00526	KICH	Antigen processing and presentation	9.0638660852696E-15
LINC00526	KICH	Human immunodeficiency virus 1 infection	1.21134266224828E-08
LINC00526	KICH	mTOR signaling pathway	7.87403100324538E-06
LINC00526	KICH	Human cytomegalovirus infection	0.0000127586809477487
LINC00526	KICH	Longevity regulating pathway	0.0000430314004460662
LINC00526	KICH	Cell cycle	0.000222742611792119
LINC00526	KICH	Hepatocellular carcinoma	0.00120842760257807
LINC00526	KICH	Neurotrophin signaling pathway	0.00337636492939795
LINC00526	KICH	Thermogenesis	0.00337636492939795
LINC00526	KICH	FoxO signaling pathway	0.00337636492939795
LINC00526	KICH	AMPK signaling pathway	0.00337636492939795
LINC00526	KICH	Thyroid hormone signaling pathway	0.00400800958209592
LINC00526	KICH	Herpes simplex virus 1 infection	0.00680094842355884
LINC00526	KICH	Insulin signaling pathway	0.00680094842355884
LINC00526	PAAD	FoxO signaling pathway	0.000129816460199501
LINC00526	PAAD	Cellular senescence	0.000129816460199501
LINC00526	PAAD	Chronic myeloid leukemia	0.000205484097590595
LINC00526	PAAD	mTOR signaling pathway	0.000205484097590595
LINC00526	PAAD	Small cell lung cancer	0.000205484097590595
LINC00526	PAAD	Cell cycle	0.000205484097590595
LINC00526	PAAD	MAPK signaling pathway	0.000271207190179082
LINC00526	PAAD	Neurotrophin signaling pathway	0.00041311545598969
LINC00526	PAAD	EGFR tyrosine kinase inhibitor resistance	0.000572718414117647
LINC00526	PAAD	Glioma	0.000572718414117647
LINC00526	PAAD	Cushing syndrome	0.000608863864599896
LINC00526	PAAD	Focal adhesion	0.000705310711671565
LINC00526	PAAD	TNF signaling pathway	0.000705310711671565
LINC00526	PAAD	AMPK signaling pathway	0.000963463230609807
LINC00526	PAAD	Pancreatic cancer	0.00120492235667281
LINC00526	PAAD	Prostate cancer	0.00147596849710551
LINC00526	PAAD	Longevity regulating pathway	0.00147596849710551
LINC00526	PAAD	Gastric cancer	0.00205930989844773
LINC00526	PAAD	Non-small cell lung cancer	0.00205930989844773
LINC00526	PAAD	ErbB signaling pathway	0.0026836771363536
LINC00526	PAAD	Endocrine resistance	0.0026836771363536
LINC00526	PAAD	Sphingolipid signaling pathway	0.00413369134349121
LINC00526	PAAD	Kaposi sarcoma-associated herpesvirus infection	0.00557675718701772
LINC00526	PAAD	Signaling pathways regulating pluripotency of stem cells	0.00578571458330334
LINC00526	PAAD	Endometrial cancer	0.00578571458330334
LINC00526	PAAD	Prolactin signaling pathway	0.00578571458330334
LINC00526	PAAD	Axon guidance	0.00578571458330334
LINC00526	PAAD	Hepatocellular carcinoma	0.00587989560412748
LINC00526	PAAD	Adipocytokine signaling pathway	0.00650744270453884
LINC00526	PAAD	Colorectal cancer	0.00650744270453884
LINC00526	PAAD	Insulin resistance	0.00685358658237184
LINC00526	PAAD	Human papillomavirus infection	0.00744467089108595
LINC00526	PAAD	Parathyroid hormone synthesis, secretion and action	0.00883550060679949
LINC00526	PAAD	Regulation of actin cytoskeleton	0.00883550060679949
LINC00526	PAAD	Fc epsilon RI signaling pathway	0.00967608523926566
LINC00526	PAAD	Relaxin signaling pathway	0.00967608523926566
LINC00526	PAAD	Apoptosis	0.00967608523926566
LINC00526	PCPG	Cell cycle	0.0000949335289951467
LINC00526	PCPG	Longevity regulating pathway	0.000221835840769741
LINC00526	PCPG	Antigen processing and presentation	0.000332309344613611
LINC00526	PCPG	Cellular senescence	0.000982649589500452
LINC00526	PCPG	EGFR tyrosine kinase inhibitor resistance	0.00376370979457767
LINC00526	PCPG	Insulin signaling pathway	0.00420905035016186
LINC00526	PCPG	FoxO signaling pathway	0.00550179635911022
LINC00526	PCPG	Neurotrophin signaling pathway	0.0058505994645418
LINC00526	PCPG	Thermogenesis	0.0058505994645418
LINC00526	PCPG	Hepatocellular carcinoma	0.0058505994645418
LINC00526	PCPG	Colorectal cancer	0.00587833100466429
LINC00526	PCPG	mTOR signaling pathway	0.00738208597365986
LINC00526	PCPG	Platinum drug resistance	0.00738208597365986
LINC00526	PCPG	TNF signaling pathway	0.00738208597365986
LINC00526	PCPG	Prolactin signaling pathway	0.00738208597365986
LINC00526	PCPG	Human immunodeficiency virus 1 infection	0.00738208597365986
LINC00526	TGCT	Longevity regulating pathway	0.0000650797312947219
LINC00526	TGCT	Cellular senescence	0.0000757538986651205
LINC00526	TGCT	Chronic myeloid leukemia	0.000227139510828064
LINC00526	TGCT	EGFR tyrosine kinase inhibitor resistance	0.000227139510828064
LINC00526	TGCT	Neurotrophin signaling pathway	0.000233636745245698
LINC00526	TGCT	Insulin signaling pathway	0.000233636745245698
LINC00526	TGCT	FoxO signaling pathway	0.000482068780923098
LINC00526	TGCT	Insulin resistance	0.000553625994208955
LINC00526	TGCT	Prostate cancer	0.000553625994208955
LINC00526	TGCT	Relaxin signaling pathway	0.000561433636266061
LINC00526	TGCT	Glioma	0.000561433636266061
LINC00526	TGCT	Pancreatic cancer	0.000614456161779532
LINC00526	TGCT	TNF signaling pathway	0.000726931730806284
LINC00526	TGCT	Signaling pathways regulating pluripotency of stem cells	0.000730854519309006
LINC00526	TGCT	AMPK signaling pathway	0.000899371442285159
LINC00526	TGCT	Hepatocellular carcinoma	0.000899371442285159
LINC00526	TGCT	MAPK signaling pathway	0.000925085655799492
LINC00526	TGCT	Gastric cancer	0.00112805145692224
LINC00526	TGCT	Sphingolipid signaling pathway	0.00124259070906219
LINC00526	TGCT	ErbB signaling pathway	0.00126299917332188
LINC00526	TGCT	Endocrine resistance	0.00126299917332188
LINC00526	TGCT	Cell cycle	0.00131447627930205
LINC00526	TGCT	Parathyroid hormone synthesis, secretion and action	0.00168191149072292
LINC00526	TGCT	mTOR signaling pathway	0.00186985784733978
LINC00526	TGCT	Colorectal cancer	0.00193003821570646
LINC00526	TGCT	Cushing syndrome	0.00200652711971941
LINC00526	TGCT	TGF-beta signaling pathway	0.00438923858446501
LINC00526	TGCT	Antigen processing and presentation	0.00462302428364017
LINC00526	TGCT	Renal cell carcinoma	0.00468061607526244
LINC00526	TGCT	Thermogenesis	0.00468061607526244
LINC00526	TGCT	Endometrial cancer	0.00544482698278245
LINC00526	TGCT	Thyroid hormone signaling pathway	0.00618353506912867
LINC00526	TGCT	C-type lectin receptor signaling pathway	0.00618353506912867
LINC00526	TGCT	HIF-1 signaling pathway	0.00675290290595377
LINC00526	TGCT	Axon guidance	0.00738271842603845
LINC00526	TGCT	Hippo signaling pathway	0.00819908644435379
LINC00526	TGCT	T cell receptor signaling pathway	0.00991960938526584
LINC00526	TGCT	Prolactin signaling pathway	0.00991960938526584
LINC00526	TGCT	Type II diabetes mellitus	0.00991960938526584
LINC00526	TGCT	Non-small cell lung cancer	0.00991960938526584
LINC00526	THYM	Cellular senescence	4.10912851809728E-09
LINC00526	THYM	Cell cycle	8.82773099254132E-08
LINC00526	THYM	Longevity regulating pathway	5.68105413949008E-07
LINC00526	THYM	AMPK signaling pathway	5.72398207850784E-07
LINC00526	THYM	FoxO signaling pathway	1.98558541647441E-06
LINC00526	THYM	Pancreatic cancer	4.98770980832262E-06
LINC00526	THYM	Thyroid hormone signaling pathway	4.98770980832262E-06
LINC00526	THYM	Chronic myeloid leukemia	4.98770980832262E-06
LINC00526	THYM	Insulin resistance	0.0000128459646725808
LINC00526	THYM	mTOR signaling pathway	0.0000215223978342279
LINC00526	THYM	TNF signaling pathway	0.0000299181840903851
LINC00526	THYM	EGFR tyrosine kinase inhibitor resistance	0.0000379183535537604
LINC00526	THYM	Adherens junction	0.0000448451955006938
LINC00526	THYM	Prostate cancer	0.000179259054687202
LINC00526	THYM	Neurotrophin signaling pathway	0.000179259054687202
LINC00526	THYM	Insulin signaling pathway	0.000179259054687202
LINC00526	THYM	Hepatocellular carcinoma	0.000221205600344186
LINC00526	THYM	Regulation of actin cytoskeleton	0.000330020972616697
LINC00526	THYM	Endocrine resistance	0.000330020972616697
LINC00526	THYM	Renal cell carcinoma	0.0003307168840299
LINC00526	THYM	Signaling pathways regulating pluripotency of stem cells	0.000342064078130172
LINC00526	THYM	Small cell lung cancer	0.000354790702845407
LINC00526	THYM	Human papillomavirus infection	0.000726367489762316
LINC00526	THYM	MAPK signaling pathway	0.000762379979524223
LINC00526	THYM	Focal adhesion	0.000867342369491275
LINC00526	THYM	Glioma	0.00112617452715292
LINC00526	THYM	Ferroptosis	0.00112617452715292
LINC00526	THYM	Hedgehog signaling pathway	0.00112617452715292
LINC00526	THYM	Gastric cancer	0.00114497437917764
LINC00526	THYM	Prolactin signaling pathway	0.00116682242883417
LINC00526	THYM	Parathyroid hormone synthesis, secretion and action	0.00143793714823974
LINC00526	THYM	Platinum drug resistance	0.00157169168020121
LINC00526	THYM	ErbB signaling pathway	0.00157169168020121
LINC00526	THYM	Apoptosis	0.00178263360854975
LINC00526	THYM	Colorectal cancer	0.0018518344382552
LINC00526	THYM	Sphingolipid signaling pathway	0.00186581371097976
LINC00526	THYM	p53 signaling pathway	0.00264314950365685
LINC00526	THYM	AGE-RAGE signaling pathway in diabetic complications	0.00273821316333176
LINC00526	THYM	Hippo signaling pathway	0.00326544657263302
LINC00526	THYM	Endometrial cancer	0.00334466190220579
LINC00526	THYM	C-type lectin receptor signaling pathway	0.00396372346926554
LINC00526	THYM	Cushing syndrome	0.00430591995751496
LINC00526	THYM	Acute myeloid leukemia	0.00812004707678192
LINC00526	THYM	Axon guidance	0.00884942196507831
LINC00526	UVM	Longevity regulating pathway	4.68911464672335E-07
LINC00526	UVM	Cellular senescence	5.51844455474797E-07
LINC00526	UVM	FoxO signaling pathway	0.0000016870867953143
LINC00526	UVM	AMPK signaling pathway	0.0000016870867953143
LINC00526	UVM	Thyroid hormone signaling pathway	5.78591100025595E-06
LINC00526	UVM	Chronic myeloid leukemia	0.0000110986090807824
LINC00526	UVM	Adherens junction	0.000017186838611495
LINC00526	UVM	Signaling pathways regulating pluripotency of stem cells	0.0000229126622719574
LINC00526	UVM	mTOR signaling pathway	0.0000229126622719574
LINC00526	UVM	Regulation of actin cytoskeleton	0.0000252226120784074
LINC00526	UVM	Insulin resistance	0.0000358943140104135
LINC00526	UVM	TNF signaling pathway	0.0000358943140104135
LINC00526	UVM	Small cell lung cancer	0.0000369369333987662
LINC00526	UVM	Pancreatic cancer	0.0000442490435850877
LINC00526	UVM	EGFR tyrosine kinase inhibitor resistance	0.0000448662115252901
LINC00526	UVM	Prostate cancer	0.0000581827580097633
LINC00526	UVM	MAPK signaling pathway	0.0000707508098399345
LINC00526	UVM	Neurotrophin signaling pathway	0.000177273495867172
LINC00526	UVM	Insulin signaling pathway	0.000197655684679092
LINC00526	UVM	Cell cycle	0.0002019057356123
LINC00526	UVM	Focal adhesion	0.000252171584295812
LINC00526	UVM	Endocrine resistance	0.000252171584295812
LINC00526	UVM	Human papillomavirus infection	0.000295617801604847
LINC00526	UVM	Hepatocellular carcinoma	0.000448251722601756
LINC00526	UVM	Prolactin signaling pathway	0.00045046976435774
LINC00526	UVM	Hedgehog signaling pathway	0.000498342682457548
LINC00526	UVM	Parathyroid hormone synthesis, secretion and action	0.000592301233737254
LINC00526	UVM	Sphingolipid signaling pathway	0.000611617344817216
LINC00526	UVM	Gastric cancer	0.00070711241534663
LINC00526	UVM	AGE-RAGE signaling pathway in diabetic complications	0.00070711241534663
LINC00526	UVM	Hippo signaling pathway	0.000737913589328383
LINC00526	UVM	C-type lectin receptor signaling pathway	0.00108014329528333
LINC00526	UVM	Renal cell carcinoma	0.00150514445698575
LINC00526	UVM	Glioma	0.00150514445698575
LINC00526	UVM	Colorectal cancer	0.00166037164269797
LINC00526	UVM	Rap1 signaling pathway	0.00233641260113234
LINC00526	UVM	Platinum drug resistance	0.00233641260113234
LINC00526	UVM	Axon guidance	0.00233641260113234
LINC00526	UVM	Apoptosis	0.00317245525333789
LINC00526	UVM	ErbB signaling pathway	0.00342875432071584
LINC00526	UVM	Endometrial cancer	0.00382562755111921
LINC00526	UVM	p53 signaling pathway	0.00449046188299948
LINC00526	UVM	Ferroptosis	0.00449046188299948
LINC00526	UVM	Cushing syndrome	0.00461151892762777
LINC00526	UVM	Ras signaling pathway	0.00894674158446995
LINC00667	CHOL	mTOR signaling pathway	0.00148854526566737
LINC00667	CHOL	Thermogenesis	0.00148854526566737
LINC00667	CHOL	Cellular senescence	0.00148854526566737
LINC00667	CHOL	Relaxin signaling pathway	0.00148854526566737
LINC00667	CHOL	Cushing syndrome	0.00148854526566737
LINC00667	CHOL	Glioma	0.00148854526566737
LINC00667	CHOL	AMPK signaling pathway	0.00148854526566737
LINC00667	CHOL	MAPK signaling pathway	0.00253084460888013
LINC00667	CHOL	Hepatocellular carcinoma	0.00383071305910598
LINC00667	CHOL	EGFR tyrosine kinase inhibitor resistance	0.00394693496312953
LINC00667	CHOL	Chronic myeloid leukemia	0.00421395214745847
LINC00667	CHOL	FoxO signaling pathway	0.00421395214745847
LINC00667	CHOL	Neurotrophin signaling pathway	0.00456467861194162
LINC00667	CHOL	Axon guidance	0.00663127530529919
LINC00667	CHOL	Human papillomavirus infection	0.00689157740325318
LINC00667	CHOL	Longevity regulating pathway	0.00762115348688362
LINC00667	CHOL	Cell cycle	0.00995714101570639
LINC00667	KIRC	Longevity regulating pathway	4.88456226670343E-09
LINC00667	KIRC	Cellular senescence	7.62942410496513E-09
LINC00667	KIRC	Cell cycle	1.69763975908953E-08
LINC00667	KIRC	Adherens junction	1.69763975908953E-08
LINC00667	KIRC	Thyroid hormone signaling pathway	8.18712034922583E-08
LINC00667	KIRC	mTOR signaling pathway	5.11909477951897E-07
LINC00667	KIRC	FoxO signaling pathway	6.18614684123835E-07
LINC00667	KIRC	Chronic myeloid leukemia	1.59726036519317E-06
LINC00667	KIRC	Pancreatic cancer	4.70305303931008E-06
LINC00667	KIRC	Insulin resistance	5.65711717289829E-06
LINC00667	KIRC	EGFR tyrosine kinase inhibitor resistance	5.65711717289829E-06
LINC00667	KIRC	Neurotrophin signaling pathway	5.95458974904119E-06
LINC00667	KIRC	ErbB signaling pathway	9.53645623074691E-06
LINC00667	KIRC	Hepatocellular carcinoma	0.0000108075188575473
LINC00667	KIRC	MAPK signaling pathway	0.0000115352638774575
LINC00667	KIRC	Insulin signaling pathway	0.0000207503053812746
LINC00667	KIRC	AMPK signaling pathway	0.0000300388030706644
LINC00667	KIRC	Prostate cancer	0.0000536771710611838
LINC00667	KIRC	AGE-RAGE signaling pathway in diabetic complications	0.0000540605116849386
LINC00667	KIRC	Focal adhesion	0.0000891802356342761
LINC00667	KIRC	Hippo signaling pathway	0.0000892463324123443
LINC00667	KIRC	Sphingolipid signaling pathway	0.0000989037602007918
LINC00667	KIRC	Endocrine resistance	0.000102122722682572
LINC00667	KIRC	TNF signaling pathway	0.000106036036660394
LINC00667	KIRC	Colorectal cancer	0.000114107192846197
LINC00667	KIRC	Renal cell carcinoma	0.000314959739750909
LINC00667	KIRC	Antigen processing and presentation	0.000458444190457863
LINC00667	KIRC	Glioma	0.000467515316525093
LINC00667	KIRC	Small cell lung cancer	0.00049725910866496
LINC00667	KIRC	Regulation of actin cytoskeleton	0.000748021513392364
LINC00667	KIRC	Parathyroid hormone synthesis, secretion and action	0.000817947754744143
LINC00667	KIRC	Apoptosis	0.000957622941573729
LINC00667	KIRC	Human immunodeficiency virus 1 infection	0.00101388198918632
LINC00667	KIRC	Signaling pathways regulating pluripotency of stem cells	0.00111471824900807
LINC00667	KIRC	Tight junction	0.00196614170157701
LINC00667	KIRC	Endometrial cancer	0.00216354427974564
LINC00667	KIRC	T cell receptor signaling pathway	0.00243039889520026
LINC00667	KIRC	Kaposi sarcoma-associated herpesvirus infection	0.0037557043330144
LINC00667	KIRC	Prolactin signaling pathway	0.003843703757147
LINC00667	KIRC	Human cytomegalovirus infection	0.003843703757147
LINC00667	KIRC	Ferroptosis	0.00451930290017407
LINC00667	KIRC	Fc gamma R-mediated phagocytosis	0.00451930290017407
LINC00667	KIRC	Adipocytokine signaling pathway	0.00480224135143093
LINC00667	KIRC	Rap1 signaling pathway	0.00513109526612873
LINC00667	KIRC	Gastric cancer	0.00583110277256069
LINC00667	KIRC	Bladder cancer	0.00610264064481846
LINC00667	KIRC	C-type lectin receptor signaling pathway	0.00653601211797976
LINC00667	KIRC	p53 signaling pathway	0.00653601211797976
LINC00667	KIRC	Relaxin signaling pathway	0.00907227339237988
LINC00667	KIRC	Human papillomavirus infection	0.00926860651135347
LINC00667	KIRC	Axon guidance	0.00995188803128495
LINC00667	KIRP	Axon guidance	0.000397853317215411
LINC00667	KIRP	T cell receptor signaling pathway	0.000523010739454081
LINC00667	KIRP	Kaposi sarcoma-associated herpesvirus infection	0.000623165624609679
LINC00667	KIRP	TNF signaling pathway	0.000708804940731459
LINC00667	KIRP	Glucagon signaling pathway	0.000736730407252983
LINC00667	KIRP	Parathyroid hormone synthesis, secretion and action	0.000940133054367214
LINC00667	KIRP	GnRH signaling pathway	0.000940133054367214
LINC00667	KIRP	PI3K-Akt signaling pathway	0.00154307321195713
LINC00667	KIRP	Thyroid cancer	0.00210586812385081
LINC00667	KIRP	Apelin signaling pathway	0.00271707627281463
LINC00667	KIRP	Regulation of lipolysis in adipocytes	0.00360703712780826
LINC00667	KIRP	C-type lectin receptor signaling pathway	0.00364289444147194
LINC00667	KIRP	Circadian rhythm	0.00529419932120573
LINC00667	KIRP	p53 signaling pathway	0.00529419932120573
LINC00667	KIRP	Fc gamma R-mediated phagocytosis	0.00605818681561092
LINC00667	KIRP	B cell receptor signaling pathway	0.00720539638251345
LINC00667	KIRP	Breast cancer	0.00720539638251345
LINC00667	KIRP	Hedgehog signaling pathway	0.00899305072881811
LINC00667	LGG	Adherens junction	1.07937236295256E-08
LINC00667	LGG	Longevity regulating pathway	1.39077243061548E-08
LINC00667	LGG	Thyroid hormone signaling pathway	6.09044121238091E-08
LINC00667	LGG	Cellular senescence	8.11710006718227E-08
LINC00667	LGG	mTOR signaling pathway	2.64504875283287E-07
LINC00667	LGG	FoxO signaling pathway	2.64504875283287E-07
LINC00667	LGG	EGFR tyrosine kinase inhibitor resistance	4.92283504687592E-07
LINC00667	LGG	Neurotrophin signaling pathway	6.93526743077135E-07
LINC00667	LGG	Chronic myeloid leukemia	8.52951166576207E-07
LINC00667	LGG	MAPK signaling pathway	8.52951166576207E-07
LINC00667	LGG	ErbB signaling pathway	1.94336642275769E-06
LINC00667	LGG	Insulin resistance	3.60993599226659E-06
LINC00667	LGG	Prostate cancer	0.0000038305734433776
LINC00667	LGG	Focal adhesion	0.0000038305734433776
LINC00667	LGG	Insulin signaling pathway	0.0000038305734433776
LINC00667	LGG	Pancreatic cancer	5.83447345544779E-06
LINC00667	LGG	AGE-RAGE signaling pathway in diabetic complications	8.04738733048662E-06
LINC00667	LGG	Endocrine resistance	8.04738733048662E-06
LINC00667	LGG	Hepatocellular carcinoma	8.04738733048662E-06
LINC00667	LGG	Hippo signaling pathway	0.0000122892291944565
LINC00667	LGG	AMPK signaling pathway	0.0000135785566005693
LINC00667	LGG	Cell cycle	0.0000201057744318567
LINC00667	LGG	Colorectal cancer	0.0000204835022975843
LINC00667	LGG	Sphingolipid signaling pathway	0.0000204835022975843
LINC00667	LGG	TNF signaling pathway	0.0000325903146171253
LINC00667	LGG	Antigen processing and presentation	0.0000443097559775639
LINC00667	LGG	Small cell lung cancer	0.0000463354161207154
LINC00667	LGG	Human cytomegalovirus infection	0.0000463354161207154
LINC00667	LGG	Glioma	0.0000532350291678336
LINC00667	LGG	Regulation of actin cytoskeleton	0.0000583119148388676
LINC00667	LGG	Renal cell carcinoma	0.0000711178851141293
LINC00667	LGG	Human immunodeficiency virus 1 infection	0.0000837326353056884
LINC00667	LGG	Signaling pathways regulating pluripotency of stem cells	0.000134667662124985
LINC00667	LGG	Parathyroid hormone synthesis, secretion and action	0.000142210727589927
LINC00667	LGG	Endometrial cancer	0.000441788044809622
LINC00667	LGG	Rap1 signaling pathway	0.000799724738921099
LINC00667	LGG	Gastric cancer	0.00112751605759623
LINC00667	LGG	Apoptosis	0.00112751605759623
LINC00667	LGG	T cell receptor signaling pathway	0.00113262681061738
LINC00667	LGG	Axon guidance	0.00137609403689716
LINC00667	LGG	Tight junction	0.00149205091912467
LINC00667	LGG	Prolactin signaling pathway	0.00160378873114969
LINC00667	LGG	Human papillomavirus infection	0.00182541406946083
LINC00667	LGG	Bladder cancer	0.00194622084721561
LINC00667	LGG	C-type lectin receptor signaling pathway	0.00196823541139397
LINC00667	LGG	Kaposi sarcoma-associated herpesvirus infection	0.00198777123133862
LINC00667	LGG	Relaxin signaling pathway	0.00206069654772627
LINC00667	LGG	GnRH signaling pathway	0.00248574290607185
LINC00667	LGG	Ras signaling pathway	0.00253242636098916
LINC00667	LGG	Acute myeloid leukemia	0.00278115820941667
LINC00667	LGG	Estrogen signaling pathway	0.00521784377864811
LINC00667	LGG	Glucagon signaling pathway	0.00522087569543195
LINC00667	LGG	Non-small cell lung cancer	0.00553046448021036
LINC00667	LGG	Fc gamma R-mediated phagocytosis	0.00604194841083845
LINC00667	LGG	p53 signaling pathway	0.00663278224846122
LINC00667	LGG	Apelin signaling pathway	0.00805046727621645
LINC00667	TGCT	mTOR signaling pathway	1.20214184096141E-09
LINC00667	TGCT	Cellular senescence	1.20214184096141E-09
LINC00667	TGCT	Cell cycle	1.20214184096141E-09
LINC00667	TGCT	AMPK signaling pathway	8.35448704093962E-09
LINC00667	TGCT	Longevity regulating pathway	2.8965112157377E-08
LINC00667	TGCT	Prostate cancer	3.86736741868247E-08
LINC00667	TGCT	Adherens junction	4.26339515137274E-08
LINC00667	TGCT	FoxO signaling pathway	8.22531562301536E-08
LINC00667	TGCT	EGFR tyrosine kinase inhibitor resistance	1.17879507799886E-07
LINC00667	TGCT	MAPK signaling pathway	1.99961154774018E-07
LINC00667	TGCT	Chronic myeloid leukemia	5.42160252437289E-07
LINC00667	TGCT	TNF signaling pathway	5.42160252437289E-07
LINC00667	TGCT	Insulin signaling pathway	6.23252292370749E-07
LINC00667	TGCT	Insulin resistance	7.44259227565298E-07
LINC00667	TGCT	Human papillomavirus infection	1.11776132497943E-06
LINC00667	TGCT	Pancreatic cancer	1.35205590039523E-06
LINC00667	TGCT	Small cell lung cancer	1.35205590039523E-06
LINC00667	TGCT	Focal adhesion	0.0000018711610221707
LINC00667	TGCT	Endocrine resistance	3.59976510069284E-06
LINC00667	TGCT	Thyroid hormone signaling pathway	3.96637732281921E-06
LINC00667	TGCT	Hepatocellular carcinoma	3.96637732281921E-06
LINC00667	TGCT	ErbB signaling pathway	7.23103250535494E-06
LINC00667	TGCT	Hippo signaling pathway	0.0000128794289731234
LINC00667	TGCT	Endometrial cancer	0.0000151134538302708
LINC00667	TGCT	Glioma	0.0000151134538302708
LINC00667	TGCT	Sphingolipid signaling pathway	0.0000165146894062486
LINC00667	TGCT	Neurotrophin signaling pathway	0.0000172205157475627
LINC00667	TGCT	Colorectal cancer	0.000027707844484556
LINC00667	TGCT	Parathyroid hormone synthesis, secretion and action	0.0000935752587235673
LINC00667	TGCT	AGE-RAGE signaling pathway in diabetic complications	0.000142844869332595
LINC00667	TGCT	Rap1 signaling pathway	0.000171425663847729
LINC00667	TGCT	Regulation of actin cytoskeleton	0.000202921745920581
LINC00667	TGCT	Renal cell carcinoma	0.000229489458424433
LINC00667	TGCT	Relaxin signaling pathway	0.00036062168180733
LINC00667	TGCT	Apoptosis	0.000421483369297421
LINC00667	TGCT	Gastric cancer	0.000596004219963875
LINC00667	TGCT	Kaposi sarcoma-associated herpesvirus infection	0.000596004219963875
LINC00667	TGCT	Signaling pathways regulating pluripotency of stem cells	0.000618754658492998
LINC00667	TGCT	Tight junction	0.000630402707991777
LINC00667	TGCT	Adipocytokine signaling pathway	0.00112834868053681
LINC00667	TGCT	p53 signaling pathway	0.00113593025745383
LINC00667	TGCT	Cushing syndrome	0.00142447782615929
LINC00667	TGCT	Prolactin signaling pathway	0.00160115336066359
LINC00667	TGCT	Bladder cancer	0.00164836947896011
LINC00667	TGCT	T cell receptor signaling pathway	0.0017611967141868
LINC00667	TGCT	PI3K-Akt signaling pathway	0.00253867805046627
LINC00667	TGCT	Circadian rhythm	0.00255704219011323
LINC00667	TGCT	Platinum drug resistance	0.00294647083043346
LINC00667	TGCT	C-type lectin receptor signaling pathway	0.00307308397875117
LINC00667	TGCT	HIF-1 signaling pathway	0.00363845569982098
LINC00667	TGCT	Ras signaling pathway	0.00415370908792928
LINC00667	TGCT	Acute myeloid leukemia	0.00444343742520617
LINC00667	TGCT	Hedgehog signaling pathway	0.00496134907908053
LINC00667	TGCT	Human cytomegalovirus infection	0.00624613979360797
LINC00667	TGCT	Gap junction	0.00924681455065017
LINC00667	UVM	Longevity regulating pathway	0.00180890066517882
LINC00667	UVM	AMPK signaling pathway	0.00180890066517882
LINC00668	CHOL	Hedgehog signaling pathway	0.00213492473719539
LINC00668	CHOL	Signaling pathways regulating pluripotency of stem cells	0.00213492473719539
LINC00668	CHOL	FoxO signaling pathway	0.00213492473719539
LINC00668	CHOL	Hepatocellular carcinoma	0.00397677959513884
LINC00668	CHOL	Hippo signaling pathway	0.00397677959513884
LINC00668	CHOL	Axon guidance	0.00617788670118334
LINC00668	THCA	Gastric cancer	0.000158847289582031
LINC00668	THCA	mTOR signaling pathway	0.000358599389011357
LINC00668	THCA	Hepatocellular carcinoma	0.000358599389011357
LINC00668	THCA	AMPK signaling pathway	0.00037572535485553
LINC00668	THCA	Chronic myeloid leukemia	0.000420632115157485
LINC00668	THCA	Signaling pathways regulating pluripotency of stem cells	0.00150944928587322
LINC00668	THCA	Breast cancer	0.00203703092649639
LINC00668	THCA	Prostate cancer	0.00209292876546677
LINC00668	THCA	Longevity regulating pathway	0.00403353708995675
LINC00668	THCA	Adherens junction	0.00403353708995675
LINC00668	THCA	Glioma	0.00441456772244895
LINC00668	THCA	Endometrial cancer	0.00441456772244895
LINC00668	THCA	Pancreatic cancer	0.00444839124495126
LINC00668	THCA	Regulation of actin cytoskeleton	0.00463666603697608
LINC00668	THCA	EGFR tyrosine kinase inhibitor resistance	0.00465979975692545
LINC00668	THCA	Axon guidance	0.00465979975692545
LINC00668	THCA	Melanoma	0.00492389360674656
LINC00668	THCA	MAPK signaling pathway	0.00904993451866646
LINC00668	THCA	FoxO signaling pathway	0.00904993451866646
LINC00668	THCA	TNF signaling pathway	0.00960995728216252
LINC00907	LUSC	AMPK signaling pathway	0.01
LINC00907	UVM	Prostate cancer	3.21341647408991E-13
LINC00907	UVM	Cellular senescence	3.21341647408991E-13
LINC00907	UVM	AMPK signaling pathway	4.26464768111918E-13
LINC00907	UVM	Cell cycle	1.00668297154155E-11
LINC00907	UVM	mTOR signaling pathway	1.1326261942301E-11
LINC00907	UVM	Pancreatic cancer	1.23749010667067E-11
LINC00907	UVM	Longevity regulating pathway	1.50479340665429E-11
LINC00907	UVM	Chronic myeloid leukemia	5.0521564167659E-11
LINC00907	UVM	TNF signaling pathway	5.0521564167659E-11
LINC00907	UVM	MAPK signaling pathway	5.30376046618829E-11
LINC00907	UVM	Insulin signaling pathway	1.64889514269422E-10
LINC00907	UVM	Small cell lung cancer	5.28427147130732E-10
LINC00907	UVM	Human papillomavirus infection	5.71688840750605E-10
LINC00907	UVM	Insulin resistance	6.47934719511764E-10
LINC00907	UVM	EGFR tyrosine kinase inhibitor resistance	6.89282630602656E-10
LINC00907	UVM	FoxO signaling pathway	1.23884218478282E-09
LINC00907	UVM	Thyroid hormone signaling pathway	5.536527879826E-09
LINC00907	UVM	AGE-RAGE signaling pathway in diabetic complications	2.13224470655368E-08
LINC00907	UVM	Endocrine resistance	2.34518966263186E-08
LINC00907	UVM	Focal adhesion	2.34518966263186E-08
LINC00907	UVM	Adherens junction	3.26236267682958E-08
LINC00907	UVM	Endometrial cancer	6.57027753604292E-08
LINC00907	UVM	Hepatocellular carcinoma	7.00743050488951E-08
LINC00907	UVM	ErbB signaling pathway	7.15377645030721E-08
LINC00907	UVM	Colorectal cancer	1.3972393212979E-07
LINC00907	UVM	Sphingolipid signaling pathway	1.4949009625294E-07
LINC00907	UVM	Hippo signaling pathway	4.17109419576242E-07
LINC00907	UVM	Glioma	1.01801235289713E-06
LINC00907	UVM	Kaposi sarcoma-associated herpesvirus infection	1.27444204411969E-06
LINC00907	UVM	Rap1 signaling pathway	1.38456335393176E-06
LINC00907	UVM	Gastric cancer	1.46565421597849E-06
LINC00907	UVM	Renal cell carcinoma	1.46565421597849E-06
LINC00907	UVM	Acute myeloid leukemia	1.46565421597849E-06
LINC00907	UVM	Signaling pathways regulating pluripotency of stem cells	2.99884728163092E-06
LINC00907	UVM	Apoptosis	5.01785681449273E-06
LINC00907	UVM	Parathyroid hormone synthesis, secretion and action	5.47650974206698E-06
LINC00907	UVM	Ras signaling pathway	6.26072269858455E-06
LINC00907	UVM	Relaxin signaling pathway	6.67358838997565E-06
LINC00907	UVM	Neurotrophin signaling pathway	7.50741156880021E-06
LINC00907	UVM	Prolactin signaling pathway	9.32740275808385E-06
LINC00907	UVM	Axon guidance	9.99251501552812E-06
LINC00907	UVM	Regulation of actin cytoskeleton	0.0000102216251179846
LINC00907	UVM	PI3K-Akt signaling pathway	0.0000183967199599001
LINC00907	UVM	Cushing syndrome	0.0000273665464130388
LINC00907	UVM	Platinum drug resistance	0.0000317655304834467
LINC00907	UVM	Hedgehog signaling pathway	0.0000623992364763685
LINC00907	UVM	HIF-1 signaling pathway	0.0000623992364763685
LINC00907	UVM	C-type lectin receptor signaling pathway	0.0000827227098669626
LINC00907	UVM	Bladder cancer	0.0000857495716002668
LINC00907	UVM	Adipocytokine signaling pathway	0.000112588486847188
LINC00907	UVM	Glucagon signaling pathway	0.000127134091039837
LINC00907	UVM	p53 signaling pathway	0.000147170839137893
LINC00907	UVM	Tight junction	0.000233472449189228
LINC00907	UVM	Fc gamma R-mediated phagocytosis	0.000250803938195625
LINC00907	UVM	IL-17 signaling pathway	0.000300218779531164
LINC00907	UVM	GnRH signaling pathway	0.000636059564708067
LINC00907	UVM	T cell receptor signaling pathway	0.000687205516449429
LINC00907	UVM	Gap junction	0.000861221112334384
LINC00907	UVM	Thyroid cancer	0.000914449518452479
LINC00907	UVM	Non-small cell lung cancer	0.00174657740779118
LINC00907	UVM	Fc epsilon RI signaling pathway	0.00196355723465771
LINC00907	UVM	VEGF signaling pathway	0.00238283615160716
LINC00907	UVM	Fluid shear stress and atherosclerosis	0.00327099331012504
LINC00907	UVM	Circadian rhythm	0.00339924110537992
LINC00907	UVM	Estrogen signaling pathway	0.00460558037959943
LINC00907	UVM	Basal cell carcinoma	0.0052435978363863
LINC00907	UVM	Apelin signaling pathway	0.00533992749198655
LINC00907	UVM	Osteoclast differentiation	0.0058705366701839
LINC00907	UVM	Oxytocin signaling pathway	0.00599720847231173
LINC00907	UVM	Human cytomegalovirus infection	0.00599720847231173
LINC001254	GBM	Cellular senescence	0.000154550730080548
LINC001254	GBM	Adherens junction	0.00176193634514055
LINC001254	GBM	Regulation of actin cytoskeleton	0.00274703104619228
LINC001254	GBM	Pancreatic cancer	0.00570439489419914
LINC001254	GBM	Colorectal cancer	0.0075845809699595
LINC001254	GBM	Human papillomavirus infection	0.00827644967427733
LINC001254	GBM	Focal adhesion	0.00827644967427733
LINC001254	GBM	Chronic myeloid leukemia	0.00883380808830043
LINC001254	GBM	Prostate cancer	0.00883380808830043
LINC001254	GBM	FoxO signaling pathway	0.00928668654940278
LINC001254	KIRP	Cell cycle	0.0000166688113709412
LINC001254	KIRP	Insulin resistance	0.0000219057364742343
LINC001254	KIRP	Chronic myeloid leukemia	0.0000219057364742343
LINC001254	KIRP	Cellular senescence	0.0000219057364742343
LINC001254	KIRP	Insulin signaling pathway	0.0000219057364742343
LINC001254	KIRP	Longevity regulating pathway	0.0000697755215386227
LINC001254	KIRP	Neurotrophin signaling pathway	0.0000697755215386227
LINC001254	KIRP	AMPK signaling pathway	0.000101934937031221
LINC001254	KIRP	mTOR signaling pathway	0.000101934937031221
LINC001254	KIRP	FoxO signaling pathway	0.000101934937031221
LINC001254	KIRP	Pancreatic cancer	0.000103645282483865
LINC001254	KIRP	Platinum drug resistance	0.000167484581498914
LINC001254	KIRP	Endocrine resistance	0.000223842192411674
LINC001254	KIRP	Prostate cancer	0.000223842192411674
LINC001254	KIRP	ErbB signaling pathway	0.000258271338399618
LINC001254	KIRP	Prolactin signaling pathway	0.00108344262790499
LINC001254	KIRP	Adherens junction	0.00160893475257255
LINC001254	KIRP	Apoptosis	0.00178670769133436
LINC001254	KIRP	Colorectal cancer	0.00178670769133436
LINC001254	KIRP	EGFR tyrosine kinase inhibitor resistance	0.00235182812181928
LINC001254	KIRP	Glioma	0.00246311410170336
LINC001254	KIRP	Endometrial cancer	0.00263609154416552
LINC001254	KIRP	Hedgehog signaling pathway	0.00317424804472868
LINC001254	KIRP	Hippo signaling pathway	0.00352218687791035
LINC001254	KIRP	AGE-RAGE signaling pathway in diabetic complications	0.00418900740199039
LINC001254	KIRP	TNF signaling pathway	0.00430638334802559
LINC001254	KIRP	Hepatocellular carcinoma	0.0050753153227013
LINC001254	KIRP	MAPK signaling pathway	0.00595326479197132
LINC001254	KIRP	Tight junction	0.00595326479197132
LINC001254	KIRP	p53 signaling pathway	0.00606694768091973
LINC001254	STAD	Oxytocin signaling pathway	0.00596787971348944
LINC001254	STAD	Axon guidance	0.00596787971348944
LINC001254	STAD	Focal adhesion	0.00596787971348944
LINC001254	STAD	Aldosterone synthesis and secretion	0.00596787971348944
LINC001254	STAD	Parathyroid hormone synthesis, secretion and action	0.00609930059158808
LINC001254	STAD	Arrhythmogenic right ventricular cardiomyopathy	0.00806058475815806
LINC001254	STAD	Inflammatory mediator regulation of TRP channels	0.00865660132975619
LINC001254	UCEC	Adipocytokine signaling pathway	0.0082673922847099
LINC001255	SARC	Apelin signaling pathway	0.00332140193451452
LINC001255	SARC	Oxytocin signaling pathway	0.00789047313455966
LINC001255	TGCT	IL-17 signaling pathway	0.00698939891315614
LINC01387	KICH	Apelin signaling pathway	0.00214936509506277
LINC01387	KIRC	mTOR signaling pathway	0.0000219478924385342
LINC01387	KIRC	Signaling pathways regulating pluripotency of stem cells	0.00251767752592791
LINC01387	KIRC	Hippo signaling pathway	0.00541786605524023
LINC01387	KIRC	Human papillomavirus infection	0.00828035273310013
LINC01387	KIRC	FoxO signaling pathway	0.00888015509375872
LINC01415	LUAD	Axon guidance	0.0000171470479723854
LINC01415	LUAD	Longevity regulating pathway	0.000695215043662841
LINC01415	LUAD	AMPK signaling pathway	0.00372089321718559
LINC01415	LUAD	Regulation of actin cytoskeleton	0.00372089321718559
LINC01415	LUAD	Chronic myeloid leukemia	0.00572509443876182
LINC01415	LUAD	Parathyroid hormone synthesis, secretion and action	0.00663033028039534
LINC01415	LUAD	Cushing syndrome	0.00663033028039534
LINC01415	LUAD	Regulation of lipolysis in adipocytes	0.00663033028039534
LINC01415	LUAD	Focal adhesion	0.00843281212155255
LINC01415	THYM	Focal adhesion	0.000795159356406359
LINC01415	THYM	Cushing syndrome	0.00130035283606818
LINC01415	THYM	Glioma	0.0045994602207552
LINC01415	THYM	Parathyroid hormone synthesis, secretion and action	0.0047522071339637
LINC01415	THYM	Thermogenesis	0.00796868426903395
LINC01415	THYM	Endometrial cancer	0.00796868426903395
LINC01415	UVM	Hippo signaling pathway	3.94927402471179E-06
LINC01415	UVM	Adherens junction	4.85938875903235E-06
LINC01415	UVM	Signaling pathways regulating pluripotency of stem cells	4.85938875903235E-06
LINC01415	UVM	Axon guidance	4.85938875903235E-06
LINC01415	UVM	MAPK signaling pathway	0.0000145842556273417
LINC01415	UVM	Rap1 signaling pathway	0.0000829087132180253
LINC01415	UVM	Glioma	0.0000904064488016653
LINC01415	UVM	Focal adhesion	0.0000912164437120809
LINC01415	UVM	Hepatocellular carcinoma	0.000133395835202809
LINC01415	UVM	Endocrine resistance	0.000144468444996932
LINC01415	UVM	Longevity regulating pathway	0.00015914299569391
LINC01415	UVM	AMPK signaling pathway	0.000174146108976565
LINC01415	UVM	Tight junction	0.000174146108976565
LINC01415	UVM	ErbB signaling pathway	0.000212887371721461
LINC01415	UVM	Regulation of actin cytoskeleton	0.000212887371721461
LINC01415	UVM	Chronic myeloid leukemia	0.000420327003586879
LINC01415	UVM	EGFR tyrosine kinase inhibitor resistance	0.000420327003586879
LINC01415	UVM	Human papillomavirus infection	0.000469663109290831
LINC01415	UVM	Nicotine addiction	0.000538003155509773
LINC01415	UVM	Neurotrophin signaling pathway	0.000538003155509773
LINC01415	UVM	Insulin signaling pathway	0.000583088661139744
LINC01415	UVM	Ras signaling pathway	0.000676014895104136
LINC01415	UVM	GnRH signaling pathway	0.000816103664613808
LINC01415	UVM	Apelin signaling pathway	0.000891599370768659
LINC01415	UVM	Cellular senescence	0.000944674232787244
LINC01415	UVM	AGE-RAGE signaling pathway in diabetic complications	0.00119846977256204
LINC01415	UVM	Prostate cancer	0.00145693751937729
LINC01415	UVM	Prolactin signaling pathway	0.00145693751937729
LINC01415	UVM	Long-term potentiation	0.00151014780488402
LINC01415	UVM	Arrhythmogenic right ventricular cardiomyopathy	0.00180608709153066
LINC01415	UVM	Gastric cancer	0.00195658799037249
LINC01415	UVM	Relaxin signaling pathway	0.00195658799037249
LINC01415	UVM	Oxytocin signaling pathway	0.00197565390730002
LINC01415	UVM	Type II diabetes mellitus	0.00208809278788356
LINC01415	UVM	Insulin resistance	0.00221041080097265
LINC01415	UVM	mTOR signaling pathway	0.00235382143468657
LINC01415	UVM	Parathyroid hormone synthesis, secretion and action	0.00266941606315639
LINC01415	UVM	Bladder cancer	0.00335301326066065
LINC01415	UVM	Fc gamma R-mediated phagocytosis	0.00488086155023763
LINC01415	UVM	Pancreatic cancer	0.00500635520335224
LINC01415	UVM	Inflammatory mediator regulation of TRP channels	0.00513174838365295
LINC01415	UVM	Thyroid hormone signaling pathway	0.00570408527927796
LINC01415	UVM	FoxO signaling pathway	0.00586017420939702
LINC01415	UVM	HIF-1 signaling pathway	0.00639586162473124
LINC01415	UVM	Cushing syndrome	0.00663368275268895
LINC01415	UVM	Amphetamine addiction	0.0074275533687082
LINC01415	UVM	Gap junction	0.00747457419664831
LINC01416	ESCA	Cellular senescence	4.37356211930962E-11
LINC01416	ESCA	FoxO signaling pathway	9.63477496370088E-11
LINC01416	ESCA	Adherens junction	6.37581317900824E-10
LINC01416	ESCA	AGE-RAGE signaling pathway in diabetic complications	6.37581317900824E-10
LINC01416	ESCA	MAPK signaling pathway	2.54581800480209E-09
LINC01416	ESCA	Prostate cancer	1.13092541315085E-08
LINC01416	ESCA	EGFR tyrosine kinase inhibitor resistance	1.38782504575095E-08
LINC01416	ESCA	Signaling pathways regulating pluripotency of stem cells	3.80777928874442E-08
LINC01416	ESCA	Sphingolipid signaling pathway	5.34411076927363E-08
LINC01416	ESCA	mTOR signaling pathway	5.38123396979044E-08
LINC01416	ESCA	Longevity regulating pathway	1.67266538495286E-07
LINC01416	ESCA	Hippo signaling pathway	1.82194376459594E-07
LINC01416	ESCA	AMPK signaling pathway	3.33950860018239E-07
LINC01416	ESCA	Human papillomavirus infection	3.54594241153808E-07
LINC01416	ESCA	PI3K-Akt signaling pathway	6.63127195522704E-07
LINC01416	ESCA	Focal adhesion	6.63127195522704E-07
LINC01416	ESCA	Neurotrophin signaling pathway	8.75374613659577E-07
LINC01416	ESCA	Regulation of actin cytoskeleton	1.49465210499719E-06
LINC01416	ESCA	Rap1 signaling pathway	1.70925190440978E-06
LINC01416	ESCA	Colorectal cancer	4.00026868682211E-06
LINC01416	ESCA	Pancreatic cancer	4.00026868682211E-06
LINC01416	ESCA	Relaxin signaling pathway	5.24701625061743E-06
LINC01416	ESCA	Axon guidance	5.31964540708851E-06
LINC01416	ESCA	Glioma	8.14210229753592E-06
LINC01416	ESCA	Cushing syndrome	8.33774122305199E-06
LINC01416	ESCA	Insulin resistance	0.0000152418636253346
LINC01416	ESCA	Renal cell carcinoma	0.0000171421041578474
LINC01416	ESCA	Ras signaling pathway	0.0000185629899957493
LINC01416	ESCA	Endometrial cancer	0.0000201442093000915
LINC01416	ESCA	Gastric cancer	0.00002352371768954
LINC01416	ESCA	Thyroid hormone signaling pathway	0.0000404779365697811
LINC01416	ESCA	ErbB signaling pathway	0.0000486850874850502
LINC01416	ESCA	TNF signaling pathway	0.0000658034496801901
LINC01416	ESCA	Chronic myeloid leukemia	0.0000752053830235955
LINC01416	ESCA	Small cell lung cancer	0.0000933619229878927
LINC01416	ESCA	Hepatocellular carcinoma	0.000171990552271116
LINC01416	ESCA	Cell cycle	0.000236452371703793
LINC01416	ESCA	p53 signaling pathway	0.000275754884696767
LINC01416	ESCA	Endocrine resistance	0.000338987737289209
LINC01416	ESCA	Kaposi sarcoma-associated herpesvirus infection	0.000350406526899217
LINC01416	ESCA	Parathyroid hormone synthesis, secretion and action	0.000532921276144257
LINC01416	ESCA	C-type lectin receptor signaling pathway	0.000627290645677412
LINC01416	ESCA	Prolactin signaling pathway	0.000636859838596216
LINC01416	ESCA	Tight junction	0.000978454450005171
LINC01416	ESCA	Non-small cell lung cancer	0.00102736555258609
LINC01416	ESCA	Fc gamma R-mediated phagocytosis	0.00104943224307964
LINC01416	ESCA	T cell receptor signaling pathway	0.00123891749745005
LINC01416	ESCA	Regulation of lipolysis in adipocytes	0.00138379923361781
LINC01416	ESCA	Fc epsilon RI signaling pathway	0.00141382449450647
LINC01416	ESCA	HIF-1 signaling pathway	0.00141382449450647
LINC01416	ESCA	VEGF signaling pathway	0.00143241079232936
LINC01416	ESCA	Insulin signaling pathway	0.00149140525555258
LINC01416	ESCA	Acute myeloid leukemia	0.00158877766906671
LINC01416	ESCA	Apelin signaling pathway	0.00252408866576876
LINC01416	ESCA	Platinum drug resistance	0.00314826720021117
LINC01416	ESCA	Thyroid cancer	0.00316547116603048
LINC01416	ESCA	GnRH signaling pathway	0.00316547116603048
LINC01416	ESCA	Osteoclast differentiation	0.00356232237910405
LINC01416	ESCA	Ferroptosis	0.00358814144561692
LINC01416	ESCA	Gap junction	0.00362946608531223
LINC01416	ESCA	Glucagon signaling pathway	0.00475886340073579
LINC01416	ESCA	Circadian rhythm	0.00938499381904682
LINC01416	KICH	Focal adhesion	0.0041267147228837
LINC01443	LUAD	Oxytocin signaling pathway	0.0000100589459475172
LINC01443	LUAD	Aldosterone synthesis and secretion	0.000561994206571916
LINC01443	LUAD	Cortisol synthesis and secretion	0.00141316945720795
LINC01443	LUAD	Dilated cardiomyopathy	0.00141316945720795
LINC01443	LUAD	Calcium signaling pathway	0.00141316945720795
LINC01443	LUAD	Relaxin signaling pathway	0.00141316945720795
LINC01443	LUAD	Long-term potentiation	0.00178621370663393
LINC01443	LUAD	Arrhythmogenic right ventricular cardiomyopathy	0.00426697657794312
LINC01443	LUAD	Cushing syndrome	0.00529322765888751
LINC01443	LUAD	cGMP-PKG signaling pathway	0.00551397846528188
LINC01443	LUAD	Axon guidance	0.00842616648604835
LINC01443	LUAD	Phospholipase D signaling pathway	0.00842616648604835
LINC01443	LUAD	Focal adhesion	0.00842616648604835
LINC01443	LUAD	Gastric acid secretion	0.00842616648604835
LINC01443	LUAD	Estrogen signaling pathway	0.00864323146233887
LINC01443	LUAD	Circadian entrainment	0.00864323146233887
LINC01443	LUAD	GnRH signaling pathway	0.00864323146233887
LINC01443	LUAD	Morphine addiction	0.00864323146233887
LINC01443	LUAD	Endocrine resistance	0.00974996963975941
LINC01443	LUAD	Amoebiasis	0.00974996963975941
LINC01443	LUAD	Inflammatory mediator regulation of TRP channels	0.00998818908368943
LINC01444	ACC	Calcium signaling pathway	0.000960618065287203
LINC01444	ACC	Axon guidance	0.00189393559005176
LINC01444	ACC	Focal adhesion	0.00307286286288608
LINC01444	ACC	Oxytocin signaling pathway	0.00307286286288608
LINC01444	ACC	Arrhythmogenic right ventricular cardiomyopathy	0.0032474323719334
LINC01444	ACC	cGMP-PKG signaling pathway	0.00942516560281739
LINC01444	KIRP	TNF signaling pathway	0.000633221411024662
LINC01444	UCEC	Focal adhesion	0.000320669268211513
LINC01444	UCEC	Gastric cancer	0.000346432199992537
LINC01444	UCEC	MAPK signaling pathway	0.000346432199992537
LINC01444	UCEC	Parathyroid hormone synthesis, secretion and action	0.000544341718036118
LINC01444	UCEC	Regulation of actin cytoskeleton	0.000960275581170966
LINC01444	UCEC	Hepatocellular carcinoma	0.000960275581170966
LINC01444	UCEC	EGFR tyrosine kinase inhibitor resistance	0.00119238972708616
LINC01444	UCEC	Relaxin signaling pathway	0.00119238972708616
LINC01444	UCEC	Glioma	0.00205407425567018
LINC01444	UCEC	Colorectal cancer	0.00268471944290063
LINC01444	UCEC	FoxO signaling pathway	0.00268471944290063
LINC01444	UCEC	Prolactin signaling pathway	0.00268471944290063
LINC01444	UCEC	Cushing syndrome	0.00268471944290063
LINC01444	UCEC	Breast cancer	0.00315761930745302
LINC01444	UCEC	Hippo signaling pathway	0.00322240213010935
LINC01444	UCEC	Cellular senescence	0.00326984728589904
LINC01444	UCEC	Chronic myeloid leukemia	0.00412280463497508
LINC01444	UCEC	Prostate cancer	0.00412280463497508
LINC01444	UCEC	PI3K-Akt signaling pathway	0.00505060230563846
LINC01444	UCEC	Circadian rhythm	0.00571961253452751
LINC01444	UCEC	AGE-RAGE signaling pathway in diabetic complications	0.00574892285578107
LINC01444	UCEC	Basal cell carcinoma	0.0077529485792991
LINC01444	UCEC	ErbB signaling pathway	0.00796028501103547
LINC01444	UCEC	Axon guidance	0.00796028501103547
LINC01444	UCEC	Endocrine resistance	0.00841318289957291
LINC01444	UCEC	Signaling pathways regulating pluripotency of stem cells	0.00918623221789064
LINC01444	UCEC	Longevity regulating pathway	0.00996353625190913
LINC01444	UCEC	Ras signaling pathway	0.00996353625190913
LINC01477	ACC	Focal adhesion	0.000520397948963063
LINC01477	ACC	Regulation of actin cytoskeleton	0.00749217467302384
LINC01477	MESO	Adherens junction	0.000132479987997325
LINC01477	MESO	Antigen processing and presentation	0.00254017361677772
LINC01477	MESO	Human immunodeficiency virus 1 infection	0.00673920802222321
LINC01477	MESO	Cell cycle	0.00936740742389914
LINC01478	LUSC	MAPK signaling pathway	9.09069720460618E-06
LINC01478	LUSC	Sphingolipid signaling pathway	0.0000101468210835603
LINC01478	LUSC	Cellular senescence	0.0000485391422284066
LINC01478	LUSC	TNF signaling pathway	0.000217031514195167
LINC01478	LUSC	Adherens junction	0.000217031514195167
LINC01478	LUSC	Neurotrophin signaling pathway	0.000331679482874115
LINC01478	LUSC	AGE-RAGE signaling pathway in diabetic complications	0.000331679482874115
LINC01478	LUSC	Insulin signaling pathway	0.000331679482874115
LINC01478	LUSC	Small cell lung cancer	0.000361839524742732
LINC01478	LUSC	Longevity regulating pathway	0.000429277694063332
LINC01478	LUSC	Influenza A	0.000429277694063332
LINC01478	LUSC	Insulin resistance	0.000553403923649829
LINC01478	LUSC	AMPK signaling pathway	0.000813474804438736
LINC01478	LUSC	Toll-like receptor signaling pathway	0.000894338135217064
LINC01478	LUSC	Ras signaling pathway	0.000912737347716299
LINC01478	LUSC	Signaling pathways regulating pluripotency of stem cells	0.000982838237652254
LINC01478	LUSC	Kaposi sarcoma-associated herpesvirus infection	0.000982838237652254
LINC01478	LUSC	Glucagon signaling pathway	0.00112627382236654
LINC01478	LUSC	Rap1 signaling pathway	0.00116333811978375
LINC01478	LUSC	IL-17 signaling pathway	0.0014528038952429
LINC01478	LUSC	GnRH signaling pathway	0.0014528038952429
LINC01478	LUSC	Fc epsilon RI signaling pathway	0.00190079853870577
LINC01478	LUSC	Endocrine resistance	0.00190079853870577
LINC01478	LUSC	Relaxin signaling pathway	0.00278924049763596
LINC01478	LUSC	FoxO signaling pathway	0.00294147970758902
LINC01478	LUSC	C-type lectin receptor signaling pathway	0.00350255246354045
LINC01478	LUSC	ErbB signaling pathway	0.00350255246354045
LINC01478	LUSC	VEGF signaling pathway	0.00384657463510518
LINC01478	LUSC	Parathyroid hormone synthesis, secretion and action	0.0044204324060774
LINC01478	LUSC	Focal adhesion	0.0049252423728428
LINC01478	LUSC	Apelin signaling pathway	0.00504376230254389
LINC01478	LUSC	Adipocytokine signaling pathway	0.00505634595008619
LINC01478	LUSC	mTOR signaling pathway	0.00647041930773125
LINC01478	LUSC	PI3K-Akt signaling pathway	0.00652222708008902
LINC01478	LUSC	Platinum drug resistance	0.00659549380661547
LINC01478	LUSC	Glioma	0.00718126117052479
LINC01478	LUSC	Chronic myeloid leukemia	0.0074473886316824
LINC01478	LUSC	Tight junction	0.0074473886316824
LINC01478	LUSC	Pancreatic cancer	0.0074473886316824
LINC01478	LUSC	p53 signaling pathway	0.00755075676325225
LINC01478	LUSC	Ferroptosis	0.00827661204345327
LINC01478	LUSC	EGFR tyrosine kinase inhibitor resistance	0.00923351604119165
LINC01478	LUSC	HIF-1 signaling pathway	0.00923351604119165
LINC01538	KIRC	Morphine addiction	0.00523310142524535
LINC01538	KIRC	Dilated cardiomyopathy	0.00523310142524535
LINC01538	KIRC	Arrhythmogenic right ventricular cardiomyopathy	0.00523310142524535
LINC01538	KIRC	Calcium signaling pathway	0.00529659489791151
LINC01538	KIRC	Circadian entrainment	0.00592583786036006
LINC01538	KIRC	Cortisol synthesis and secretion	0.00816363812994065
LINC01538	KIRC	Oxytocin signaling pathway	0.00816363812994065
LINC01538	KIRC	Hypertrophic cardiomyopathy	0.00874047106306233
LINC01538	KIRC	Long-term potentiation	0.00959083217105644
LINC01538	PAAD	Thermogenesis	0.00100669099245273
LINC01538	PAAD	Human papillomavirus infection	0.0055863486417536
LINC01538	PAAD	mTOR signaling pathway	0.00989022486920647
LINC01538	PAAD	FoxO signaling pathway	0.00989022486920647
LINC01539	TGCT	Axon guidance	0.000468512930238074
LINC01539	TGCT	EGFR tyrosine kinase inhibitor resistance	0.00458762684352487
LINC01539	TGCT	Adherens junction	0.00671298211502595
LINC01539	TGCT	PI3K-Akt signaling pathway	0.0101617192798581
LINC01539	TGCT	Focal adhesion	0.0101617192798581
LINC01539	TGCT	Cushing syndrome	0.0111712260562942
LINC01539	TGCT	Calcium signaling pathway	0.0116974971764609
LINC01539	TGCT	Hippo signaling pathway	0.0116974971764609
LINC01539	TGCT	mTOR signaling pathway	0.0197352093866029
LINC01539	TGCT	Rap1 signaling pathway	0.0228322655975984
LINC01541	HNSC	Axon guidance	0.00176637047112872
LINC01541	HNSC	Rap1 signaling pathway	0.00307716853750232
LINC01541	HNSC	Focal adhesion	0.00307716853750232
LINC01541	HNSC	Adherens junction	0.00546165944886684
LINC01541	HNSC	AMPK signaling pathway	0.00628953208949684
LINC01541	HNSC	PI3K-Akt signaling pathway	0.00982962581700432
LINC01541	LUAD	Axon guidance	0.0000669876781386695
LINC01541	LUAD	Adherens junction	0.0000730402887690113
LINC01541	LUAD	Focal adhesion	0.0000730402887690113
LINC01541	LUAD	Regulation of actin cytoskeleton	0.000285766059159633
LINC01541	LUAD	Hepatocellular carcinoma	0.00188855348783872
LINC01541	LUAD	Inflammatory mediator regulation of TRP channels	0.00334922997940769
LINC01541	LUAD	Cushing syndrome	0.0040815684221659
LINC01541	LUAD	Fc gamma R-mediated phagocytosis	0.00583985317485395
LINC01541	LUAD	Aldosterone synthesis and secretion	0.0074396976919713
LINC01543	LUAD	Estrogen signaling pathway	0.00273934955892583
LINC01544	UVM	Axon guidance	0.00391992573671649
LINC01544	UVM	Adherens junction	0.00391992573671649
LINC01544	UVM	Leukocyte transendothelial migration	0.0062730758104894

## Sheet: Sorted by pathway terms
lincRNAs	Cancer types	Cancer-associated pathways	adj. p-value
LINC00470	CHOL	Adherens junction	0.000410166720906832
LINC00470	KIRC	Adherens junction	2.67915861716021E-10
LINC00526	CHOL	Adherens junction	0.0000342053164375103
LINC00526	THYM	Adherens junction	0.0000448451955006938
LINC00526	UVM	Adherens junction	0.000017186838611495
LINC00667	KIRC	Adherens junction	1.69763975908953E-08
LINC00667	LGG	Adherens junction	1.07937236295256E-08
LINC00667	TGCT	Adherens junction	4.26339515137274E-08
LINC00668	THCA	Adherens junction	0.00403353708995675
LINC00907	UVM	Adherens junction	3.26236267682958E-08
LINC01254	GBM	Adherens junction	0.00176193634514055
LINC01254	KIRP	Adherens junction	0.00160893475257255
LINC01415	UVM	Adherens junction	4.85938875903235E-06
LINC01416	ESCA	Adherens junction	6.37581317900824E-10
LINC01477	MESO	Adherens junction	0.000132479987997325
LINC01478	LUSC	Adherens junction	0.000217031514195167
LINC01539	TGCT	Adherens junction	0.00671298211502595
LINC01541	HNSC	Adherens junction	0.00546165944886684
LINC01541	LUAD	Adherens junction	0.0000730402887690113
LINC01544	UVM	Adherens junction	0.00391992573671649
LINC00470	CHOL	AMPK signaling pathway	0.0000570230818710779
LINC00470	KIRC	AMPK signaling pathway	2.49111496387682E-08
LINC00526	CHOL	AMPK signaling pathway	0.0000948157119242317
LINC00526	KICH	AMPK signaling pathway	0.00337636492939795
LINC00526	PAAD	AMPK signaling pathway	0.000963463230609807
LINC00526	TGCT	AMPK signaling pathway	0.000899371442285159
LINC00526	THYM	AMPK signaling pathway	5.72398207850784E-07
LINC00526	UVM	AMPK signaling pathway	0.0000016870867953143
LINC00667	CHOL	AMPK signaling pathway	0.00148854526566737
LINC00667	KIRC	AMPK signaling pathway	0.0000300388030706644
LINC00667	LGG	AMPK signaling pathway	0.0000135785566005693
LINC00667	TGCT	AMPK signaling pathway	8.35448704093962E-09
LINC00667	UVM	AMPK signaling pathway	0.00180890066517882
LINC00668	THCA	AMPK signaling pathway	0.00037572535485553
LINC00907	LUSC	AMPK signaling pathway	0.01
LINC00907	UVM	AMPK signaling pathway	4.26464768111918E-13
LINC01254	KIRP	AMPK signaling pathway	0.000101934937031221
LINC01415	LUAD	AMPK signaling pathway	0.00372089321718559
LINC01415	UVM	AMPK signaling pathway	0.000174146108976565
LINC01416	ESCA	AMPK signaling pathway	3.33950860018239E-07
LINC01478	LUSC	AMPK signaling pathway	0.000813474804438736
LINC01541	HNSC	AMPK signaling pathway	0.00628953208949684
LINC00526	PAAD	Apoptosis	0.00967608523926566
LINC00526	THYM	Apoptosis	0.00178263360854975
LINC00526	UVM	Apoptosis	0.00317245525333789
LINC00667	KIRC	Apoptosis	0.000957622941573729
LINC00667	LGG	Apoptosis	0.00112751605759623
LINC00667	TGCT	Apoptosis	0.000421483369297421
LINC00907	UVM	Apoptosis	5.01785681449273E-06
LINC01254	KIRP	Apoptosis	0.00178670769133436
LINC00470	CHOL	ErbB signaling pathway	0.000528181758792262
LINC00470	KIRC	ErbB signaling pathway	0.0000854841950056255
LINC00526	CHOL	ErbB signaling pathway	0.00566447876447681
LINC00526	PAAD	ErbB signaling pathway	0.0026836771363536
LINC00526	TGCT	ErbB signaling pathway	0.00126299917332188
LINC00526	THYM	ErbB signaling pathway	0.00157169168020121
LINC00526	UVM	ErbB signaling pathway	0.00342875432071584
LINC00667	KIRC	ErbB signaling pathway	9.53645623074691E-06
LINC00667	LGG	ErbB signaling pathway	1.94336642275769E-06
LINC00667	TGCT	ErbB signaling pathway	7.23103250535494E-06
LINC00907	UVM	ErbB signaling pathway	7.15377645030721E-08
LINC01254	KIRP	ErbB signaling pathway	0.000258271338399618
LINC01415	UVM	ErbB signaling pathway	0.000212887371721461
LINC01416	ESCA	ErbB signaling pathway	0.0000486850874850502
LINC01444	UCEC	ErbB signaling pathway	0.00796028501103547
LINC01478	LUSC	ErbB signaling pathway	0.00350255246354045
LINC00470	CHOL	Focal adhesion	0.000278592438896427
LINC00470	KIRC	Focal adhesion	1.11388961854591E-07
LINC00526	CHOL	Focal adhesion	0.00161148287725716
LINC00526	PAAD	Focal adhesion	0.000705310711671565
LINC00526	THYM	Focal adhesion	0.000867342369491275
LINC00526	UVM	Focal adhesion	0.000252171584295812
LINC00667	KIRC	Focal adhesion	0.0000891802356342761
LINC00667	LGG	Focal adhesion	0.0000038305734433776
LINC00667	TGCT	Focal adhesion	0.0000018711610221707
LINC00907	UVM	Focal adhesion	2.34518966263186E-08
LINC001254	GBM	Focal adhesion	0.00827644967427733
LINC001254	STAD	Focal adhesion	0.00596787971348944
LINC01415	LUAD	Focal adhesion	0.00843281212155255
LINC01415	THYM	Focal adhesion	0.000795159356406359
LINC01415	UVM	Focal adhesion	0.0000912164437120809
LINC01416	ESCA	Focal adhesion	6.63127195522704E-07
LINC01416	KICH	Focal adhesion	0.0041267147228837
LINC01443	LUAD	Focal adhesion	0.00842616648604835
LINC01444	ACC	Focal adhesion	0.00307286286288608
LINC01444	UCEC	Focal adhesion	0.000320669268211513
LINC01477	ACC	Focal adhesion	0.000520397948963063
LINC01478	LUSC	Focal adhesion	0.0049252423728428
LINC01539	TGCT	Focal adhesion	0.0101617192798581
LINC01541	HNSC	Focal adhesion	0.00307716853750232
LINC01541	LUAD	Focal adhesion	0.0000730402887690113
LINC00470	CHOL	FoxO signaling pathway	0.000130103812730847
LINC00470	KIRC	FoxO signaling pathway	2.95830344086811E-11
LINC00526	CHOL	FoxO signaling pathway	0.00101063429407734
LINC00526	KICH	FoxO signaling pathway	0.00337636492939795
LINC00526	PAAD	FoxO signaling pathway	0.000129816460199501
LINC00526	PCPG	FoxO signaling pathway	0.00550179635911022
LINC00526	TGCT	FoxO signaling pathway	0.000482068780923098
LINC00526	THYM	FoxO signaling pathway	1.98558541647441E-06
LINC00526	UVM	FoxO signaling pathway	0.0000016870867953143
LINC00667	CHOL	FoxO signaling pathway	0.00421395214745847
LINC00667	KIRC	FoxO signaling pathway	6.18614684123835E-07
LINC00667	LGG	FoxO signaling pathway	2.64504875283287E-07
LINC00667	TGCT	FoxO signaling pathway	8.22531562301536E-08
LINC00668	CHOL	FoxO signaling pathway	0.00213492473719539
LINC00668	THCA	FoxO signaling pathway	0.00904993451866646
LINC00907	UVM	FoxO signaling pathway	1.23884218478282E-09
LINC01254	GBM	FoxO signaling pathway	0.00928668654940278
LINC01254	KIRP	FoxO signaling pathway	0.000101934937031221
LINC01387	KIRC	FoxO signaling pathway	0.00888015509375872
LINC01415	UVM	FoxO signaling pathway	0.00586017420939702
LINC01416	ESCA	FoxO signaling pathway	9.63477496370088E-11
LINC01444	UCEC	FoxO signaling pathway	0.00268471944290063
LINC01478	LUSC	FoxO signaling pathway	0.00294147970758902
LINC01538	PAAD	FoxO signaling pathway	0.00989022486920647
LINC00526	CHOL	Hedgehog signaling pathway	0.00649843989206706
LINC00526	THYM	Hedgehog signaling pathway	0.00112617452715292
LINC00526	UVM	Hedgehog signaling pathway	0.000498342682457548
LINC00667	KIRP	Hedgehog signaling pathway	0.00899305072881811
LINC00667	TGCT	Hedgehog signaling pathway	0.00496134907908053
LINC00668	CHOL	Hedgehog signaling pathway	0.00213492473719539
LINC00907	UVM	Hedgehog signaling pathway	0.0000623992364763685
LINC01254	KIRP	Hedgehog signaling pathway	0.00317424804472868
LINC00470	KIRC	HIF-1 signaling pathway	0.00135850013936584
LINC00526	CHOL	HIF-1 signaling pathway	0.00375087209509303
LINC00526	TGCT	HIF-1 signaling pathway	0.00675290290595377
LINC00667	TGCT	HIF-1 signaling pathway	0.00363845569982098
LINC00907	UVM	HIF-1 signaling pathway	0.0000623992364763685
LINC01415	UVM	HIF-1 signaling pathway	0.00639586162473124
LINC01416	ESCA	HIF-1 signaling pathway	0.00141382449450647
LINC01478	LUSC	HIF-1 signaling pathway	0.00923351604119165
LINC00470	KIRC	Hippo signaling pathway	2.86818657764487E-08
LINC00526	CHOL	Hippo signaling pathway	0.00177581284009685
LINC00526	TGCT	Hippo signaling pathway	0.00819908644435379
LINC00526	THYM	Hippo signaling pathway	0.00326544657263302
LINC00526	UVM	Hippo signaling pathway	0.000737913589328383
LINC00667	KIRC	Hippo signaling pathway	0.0000892463324123443
LINC00667	LGG	Hippo signaling pathway	0.0000122892291944565
LINC00667	TGCT	Hippo signaling pathway	0.0000128794289731234
LINC00668	CHOL	Hippo signaling pathway	0.00397677959513884
LINC00907	UVM	Hippo signaling pathway	4.17109419576242E-07
LINC01254	KIRP	Hippo signaling pathway	0.00352218687791035
LINC01387	KIRC	Hippo signaling pathway	0.00541786605524023
LINC01415	UVM	Hippo signaling pathway	3.94927402471179E-06
LINC01416	ESCA	Hippo signaling pathway	1.82194376459594E-07
LINC01444	UCEC	Hippo signaling pathway	0.00322240213010935
LINC01539	TGCT	Hippo signaling pathway	0.0116974971764609
LINC00470	CHOL	MAPK signaling pathway	0.00781721447143796
LINC00470	KIRC	MAPK signaling pathway	7.36959954804207E-11
LINC00526	CHOL	MAPK signaling pathway	0.0000221087447135034
LINC00526	PAAD	MAPK signaling pathway	0.000271207190179082
LINC00526	TGCT	MAPK signaling pathway	0.000925085655799492
LINC00526	THYM	MAPK signaling pathway	0.000762379979524223
LINC00526	UVM	MAPK signaling pathway	0.0000707508098399345
LINC00667	CHOL	MAPK signaling pathway	0.00253084460888013
LINC00667	KIRC	MAPK signaling pathway	0.0000115352638774575
LINC00667	LGG	MAPK signaling pathway	8.52951166576207E-07
LINC00667	TGCT	MAPK signaling pathway	1.99961154774018E-07
LINC00668	THCA	MAPK signaling pathway	0.00904993451866646
LINC00907	UVM	MAPK signaling pathway	5.30376046618829E-11
LINC01254	KIRP	MAPK signaling pathway	0.00595326479197132
LINC01415	UVM	MAPK signaling pathway	0.0000145842556273417
LINC01416	ESCA	MAPK signaling pathway	2.54581800480209E-09
LINC01444	UCEC	MAPK signaling pathway	0.000346432199992537
LINC01478	LUSC	MAPK signaling pathway	9.09069720460618E-06
LINC00470	CHOL	mTOR signaling pathway	9.44418634231175E-06
LINC00470	KIRC	mTOR signaling pathway	1.11388961854591E-07
LINC00526	CHOL	mTOR signaling pathway	0.000641803441081219
LINC00526	KICH	mTOR signaling pathway	7.87403100324538E-06
LINC00526	PAAD	mTOR signaling pathway	0.000205484097590595
LINC00526	PCPG	mTOR signaling pathway	0.00738208597365986
LINC00526	TGCT	mTOR signaling pathway	0.00186985784733978
LINC00526	THYM	mTOR signaling pathway	0.0000215223978342279
LINC00526	UVM	mTOR signaling pathway	0.0000229126622719574
LINC00667	CHOL	mTOR signaling pathway	0.00148854526566737
LINC00667	KIRC	mTOR signaling pathway	5.11909477951897E-07
LINC00667	LGG	mTOR signaling pathway	2.64504875283287E-07
LINC00667	TGCT	mTOR signaling pathway	1.20214184096141E-09
LINC00668	THCA	mTOR signaling pathway	0.000358599389011357
LINC00907	UVM	mTOR signaling pathway	1.1326261942301E-11
LINC01254	KIRP	mTOR signaling pathway	0.000101934937031221
LINC01387	KIRC	mTOR signaling pathway	0.0000219478924385342
LINC01415	UVM	mTOR signaling pathway	0.00235382143468657
LINC01416	ESCA	mTOR signaling pathway	5.38123396979044E-08
LINC01478	LUSC	mTOR signaling pathway	0.00647041930773125
LINC01538	PAAD	mTOR signaling pathway	0.00989022486920647
LINC01539	TGCT	mTOR signaling pathway	0.0197352093866029
LINC00470	CHOL	p53 signaling pathway	0.000227105775110043
LINC00470	KIRC	p53 signaling pathway	0.000523012513696657
LINC00526	THYM	p53 signaling pathway	0.00264314950365685
LINC00526	UVM	p53 signaling pathway	0.00449046188299948
LINC00667	KIRC	p53 signaling pathway	0.00653601211797976
LINC00667	KIRP	p53 signaling pathway	0.00529419932120573
LINC00667	LGG	p53 signaling pathway	0.00663278224846122
LINC00667	TGCT	p53 signaling pathway	0.00113593025745383
LINC00907	UVM	p53 signaling pathway	0.000147170839137893
LINC01254	KIRP	p53 signaling pathway	0.00606694768091973
LINC01416	ESCA	p53 signaling pathway	0.000275754884696767
LINC01478	LUSC	p53 signaling pathway	0.00755075676325225
LINC00470	KIRC	PI3K-Akt signaling pathway	1.25820253621221E-07
LINC00667	KIRP	PI3K-Akt signaling pathway	0.00154307321195713
LINC00667	TGCT	PI3K-Akt signaling pathway	0.00253867805046627
LINC00907	UVM	PI3K-Akt signaling pathway	0.0000183967199599001
LINC01416	ESCA	PI3K-Akt signaling pathway	6.63127195522704E-07
LINC01444	UCEC	PI3K-Akt signaling pathway	0.00505060230563846
LINC01478	LUSC	PI3K-Akt signaling pathway	0.00652222708008902
LINC01539	TGCT	PI3K-Akt signaling pathway	0.0101617192798581
LINC01541	HNSC	PI3K-Akt signaling pathway	0.00982962581700432
