# Supplementary material for: Long Intergenic Non-Coding RNAs of Human Chromosome 18: Focus on Cancers
Source: Biomedicines. 2024 Feb 28;12(3):544. doi: 10.3390/biomedicines12030544 (PMC10968066; doi:10.3390/biomedicines12030544)
Supplement: Supplementary file 1 [file biomedicines-12-00544-s001.zip › Table_S16_Ershov.xlsx]

## Sheet: lincRNA-proteins interactions
Table S16. A list of lincRNAs-protein interactions
lincRNAs	Proteins		n
LINC00470	A1CF
LINC00907	ACTR3C
LINC00470	ADAR
LINC00907	ADAR
LINC00526	AES
LINC00470	AGGF1
LINC00470	AGO1
LINC00907	AGO1
LINC00667	AGO2	AGO2	4
LINC00668	AGO2
LINC00907	AGO2
LINC01917	AGO2
LINC00668	AGO3
LINC00668	AGO4
LINC00470	AKAP8L
LINC00305	AR	AR	12
LINC00668	AR
LINC01416	AR
LINC01443	AR
LINC01478	AR
LINC01895	AR
LINC01899	AR
LINC01915	AR
LINC01925	AR
LINC01926	AR
LINC01928	AR
LINC02564	AR
LINC00526	AXL
LINC00667	BCCIP
LINC00907	BCCIP
LINC00470	BUD13
LINC00668	BUD13
LINC00668	C3orf17
LINC00526	CCDC57
LINC00668	CDKN1B
LINC00668	CDKN1C
LINC00668	CDKN2A
LINC00668	CDKN2B
LINC02582	CHEK1
LINC00470	CPSF1
LINC00907	CPSF1
LINC00470	CPSF5
LINC00470	CPSF6
LINC00470	CPSF7
LINC00907	CPSF7
LINC00907	CRNKL1
LINC00470	CSTF2	CSTF2	3
LINC00667	CSTF2
LINC00907	CSTF2
LINC00470	CSTF2T	CSTF2T	4
LINC00667	CSTF2T
LINC00668	CSTF2T
LINC00907	CSTF2T
LINC00526	CTCF	CTCF	22
LINC00667	CTCF
LINC00668	CTCF
LINC00907	CTCF
LINC01254	CTCF
LINC01387	CTCF
LINC01415	CTCF
LINC01444	CTCF
LINC01539	CTCF
LINC01543	CTCF
LINC01882	CTCF
LINC01892	CTCF
LINC01894	CTCF
LINC01895	CTCF
LINC01899	CTCF
LINC01906	CTCF
LINC01915	CTCF
LINC01919	CTCF
LINC01924	CTCF
LINC01925	CTCF
LINC01926	CTCF
LINC02564	CTCF
LINC00305	DBHS	DBHS	3
LINC00470	DBHS
LINC00907	DBHS
LINC00470	DDX24
LINC00470	DDX3X	DDX3X	4
LINC00667	DDX3X
LINC00668	DDX3X
LINC00907	DDX3X
LINC00470	DDX42
LINC00470	DDX5
LINC00470	DDX55
LINC00470	DDX6
LINC00470	DGCR8
LINC00470	DHX30
LINC00305	DHX36	DHX36	9
LINC00470	DHX36
LINC00470	DHX36
LINC00526	DHX36
LINC00907	DHX36
LINC01387	DHX36
LINC01902	DHX36
LINC01917	DHX36
LINC02856	DHX36
LINC00668	E2F1
LINC00668	EIF2C1
LINC00667	EIF3H
LINC00470	eIF4AIII
LINC00470	EIF4G2
LINC00667	ELAVL1
LINC01254	ESR1	ESR1	11
LINC01255	ESR1
LINC01387	ESR1
LINC01443	ESR1
LINC01478	ESR1
LINC01882	ESR1
LINC01904	ESR1
LINC01925	ESR1
LINC01926	ESR1
LINC02564	ESR1
LINC02582	ESR1
LINC00470	EWSR1	EWSR1	3
LINC00470	EWSR1
LINC00907	EWSR1
LINC00470	EXOS5
LINC00470	EXOSC10
LINC00907	EXOSC10
LINC00526	EZH2
LINC00668	EZH2
LINC00470	FAKD2
LINC00667	FAKD2
LINC00470	FAM120A
LINC00668	FAM120A
LINC00305	FBL	FBL	4
LINC00470	FBL
LINC00668	FBL
LINC00907	FBL
LINC00470	FMR1
LINC00470	FOXA1	FOXA1	21
LINC00668	FOXA1
LINC00907	FOXA1
LINC01254	FOXA1
LINC01255	FOXA1
LINC01387	FOXA1
LINC01416	FOXA1
LINC01443	FOXA1
LINC01478	FOXA1
LINC01538	FOXA1
LINC01630	FOXA1
LINC01882	FOXA1
LINC01901	FOXA1
LINC01904	FOXA1
LINC01908	FOXA1
LINC01910	FOXA1
LINC01912	FOXA1
LINC01915	FOXA1
LINC01925	FOXA1
LINC01926	FOXA1
LINC02582	FOXA1
LINC00470	FOXP4
LINC00470	FTO
LINC01902	FTO
LINC00907	FUBP1
LINC00470	FUBP2
LINC00470	FUBP3
LINC00305	FUS	FUS	4
LINC00470	FUS
LINC00667	FUS
LINC00907	FUS
LINC00470	FXR1
LINC00668	FXR1
LINC01882	GATA6
LINC01926	GATA6
LINC00470	GEMI5
LINC00470	GPKOW
LINC00668	GPKOW
LINC00667	GRWD1
LINC00907	GRWD1
LINC00470	H3K27ac	H3K27ac	40
LINC00526	H3K27ac
LINC00667	H3K27ac
LINC00668	H3K27ac
LINC00907	H3K27ac
LINC01254	H3K27ac
LINC01255	H3K27ac
LINC01387	H3K27ac
LINC01415	H3K27ac
LINC01416	H3K27ac
LINC01443	H3K27ac
LINC01444	H3K27ac
LINC01477	H3K27ac
LINC01478	H3K27ac
LINC01538	H3K27ac
LINC01539	H3K27ac
LINC01543	H3K27ac
LINC01544	H3K27ac
LINC01630	H3K27ac
LINC01882	H3K27ac
LINC01887	H3K27ac
LINC01892	H3K27ac
LINC01894	H3K27ac
LINC01895	H3K27ac
LINC01901	H3K27ac
LINC01904	H3K27ac
LINC01906	H3K27ac
LINC01908	H3K27ac
LINC01910	H3K27ac
LINC01912	H3K27ac
LINC01915	H3K27ac
LINC01917	H3K27ac
LINC01919	H3K27ac
LINC01922	H3K27ac
LINC01924	H3K27ac
LINC01925	H3K27ac
LINC01926	H3K27ac
LINC01928	H3K27ac
LINC02564	H3K27ac
LINC02582	H3K27ac
LINC00305	H3K27me3	H3K27me3	46
LINC00470	H3K27me3
LINC00526	H3K27me3
LINC00667	H3K27me3
LINC00668	H3K27me3
LINC00907	H3K27me3
LINC01254	H3K27me3
LINC01255	H3K27me3
LINC01387	H3K27me3
LINC01415	H3K27me3
LINC01416	H3K27me3
LINC01443	H3K27me3
LINC01444	H3K27me3
LINC01477	H3K27me3
LINC01478	H3K27me3
LINC01538	H3K27me3
LINC01539	H3K27me3
LINC01541	H3K27me3
LINC01543	H3K27me3
LINC01544	H3K27me3
LINC01630	H3K27me3
LINC01882	H3K27me3
LINC01887	H3K27me3
LINC01892	H3K27me3
LINC01894	H3K27me3
LINC01895	H3K27me3
LINC01899	H3K27me3
LINC01901	H3K27me3
LINC01903	H3K27me3
LINC01904	H3K27me3
LINC01906	H3K27me3
LINC01908	H3K27me3
LINC01910	H3K27me3
LINC01912	H3K27me3
LINC01915	H3K27me3
LINC01916	H3K27me3
LINC01917	H3K27me3
LINC01919	H3K27me3
LINC01922	H3K27me3
LINC01924	H3K27me3
LINC01925	H3K27me3
LINC01926	H3K27me3
LINC01928	H3K27me3
LINC02564	H3K27me3
LINC02565	H3K27me3
LINC02582	H3K27me3
LINC00305	H3K4me1	H3K4me1	37
LINC00526	H3K4me1
LINC00667	H3K4me1
LINC00668	H3K4me1
LINC00907	H3K4me1
LINC01254	H3K4me1
LINC01255	H3K4me1
LINC01387	H3K4me1
LINC01415	H3K4me1
LINC01416	H3K4me1
LINC01443	H3K4me1
LINC01444	H3K4me1
LINC01477	H3K4me1
LINC01478	H3K4me1
LINC01538	H3K4me1
LINC01539	H3K4me1
LINC01543	H3K4me1
LINC01544	H3K4me1
LINC01630	H3K4me1
LINC01882	H3K4me1
LINC01887	H3K4me1
LINC01892	H3K4me1
LINC01894	H3K4me1
LINC01895	H3K4me1
LINC01901	H3K4me1
LINC01904	H3K4me1
LINC01908	H3K4me1
LINC01910	H3K4me1
LINC01912	H3K4me1
LINC01915	H3K4me1
LINC01922	H3K4me1
LINC01924	H3K4me1
LINC01925	H3K4me1
LINC01926	H3K4me1
LINC01929	H3K4me1
LINC02564	H3K4me1
LINC02582	H3K4me1
LINC00470	H3K4me2	H3K4me2	23
LINC00526	H3K4me2
LINC00667	H3K4me2
LINC00668	H3K4me2
LINC01254	H3K4me2
LINC01387	H3K4me2
LINC01415	H3K4me2
LINC01443	H3K4me2
LINC01444	H3K4me2
LINC01478	H3K4me2
LINC01539	H3K4me2
LINC01544	H3K4me2
LINC01630	H3K4me2
LINC01882	H3K4me2
LINC01894	H3K4me2
LINC01895	H3K4me2
LINC01901	H3K4me2
LINC01910	H3K4me2
LINC01912	H3K4me2
LINC01915	H3K4me2
LINC01922	H3K4me2
LINC01925	H3K4me2
LINC01926	H3K4me2
LINC00526	H3K4me3	H3K4me3	27
LINC00667	H3K4me3
LINC00668	H3K4me3
LINC01254	H3K4me3
LINC01387	H3K4me3
LINC01415	H3K4me3
LINC01443	H3K4me3
LINC01444	H3K4me3
LINC01538	H3K4me3
LINC01541	H3K4me3
LINC01543	H3K4me3
LINC01630	H3K4me3
LINC01882	H3K4me3
LINC01892	H3K4me3
LINC01895	H3K4me3
LINC01901	H3K4me3
LINC01904	H3K4me3
LINC01906	H3K4me3
LINC01910	H3K4me3
LINC01912	H3K4me3
LINC01915	H3K4me3
LINC01922	H3K4me3
LINC01925	H3K4me3
LINC01926	H3K4me3
LINC01929	H3K4me3
LINC02564	H3K4me3
LINC02582	H3K4me3
LINC00526	H3K9ac
LINC00667	H3K9ac
LINC01906	H3K9me3
LINC00305	HDAC9
LINC00907	HDAC9
LINC00470	hLARP7
LINC00470	HLTF
LINC00526	HNF4A	HNF4A	4
LINC00667	HNF4A
LINC01910	HNF4A
LINC01912	HNF4A
LINC00470	hnRNPA1
LINC00667	HNRNPA1
LINC00907	HNRNPA1
LINC00305	hnRNPA2B1	hnRNPA2B1	4
LINC00470	hnRNPA2B1
LINC00667	hnRNPA2B1
LINC00907	hnRNPA2B1
LINC00470	hnRNPC	hnRNPC	4
LINC00667	hnRNPC
LINC00668	hnRNPC
LINC00907	hnRNPC
LINC00470	hnRNPL	hnRNPL	3
LINC00667	hnRNPL
LINC00907	hnRNPL
LINC00470	hnRNPM	hnRNPM	4
LINC00667	hnRNPM
LINC00907	hnRNPM
LINC01917	HNRNPM
LINC00470	HNRNPU	HNRNPU	4
LINC00667	HNRNPU
LINC00668	HNRNPU
LINC00907	HNRNPU
LINC00470	HNRNPUL1
LINC00907	HNRNPUL1
LINC00470	HNRPG
LINC00470	HNRPK
LINC00470	IF2B1	IF2B1	4
LINC00667	IF2B1
LINC00668	IF2B1
LINC00470	IF2B2
LINC00305	IGF2BP1	IGF2BP1	9
LINC00470	IGF2BP1
LINC00667	IGF2BP1
LINC00668	IGF2BP1
LINC00907	IGF2BP1
LINC01387	IGF2BP1
LINC01902	IGF2BP1
LINC01917	IGF2BP1
LINC02856	IGF2BP1
LINC00667	IGF2BP2
LINC00305	IGF2BP3	IGF2BP3	9
LINC00470	IGF2BP3
LINC00667	IGF2BP3
LINC00668	IGF2BP3
LINC00907	IGF2BP3
LINC01387	IGF2BP3
LINC01902	IGF2BP3
LINC01917	IGF2BP3
LINC02856	IGF2BP3
LINC00667	IKBKB
LINC00470	ILF2
LINC00470	ILF3
LINC00907	ILF3
LINC00470	KHDR1
LINC00470	KHDRBS2
LINC00668	KLF7
LINC00668	KLK14
LINC00526	KRT31
LINC00470	LARP4
LINC00470	LIN28B
LINC00470	LINC00310
LINC00305	LMBR1L
LINC00470	LSM11	LSM11	4
LINC00667	LSM11
LINC00668	LSM11
LINC00907	LSM11
LINC00907	MATR3
LINC00907	MBNL2
LINC00470	METAP2
LINC00305	MOV10	MOV10	4
LINC00470	MOV10
LINC00667	MOV10
LINC00907	MOV10
LINC00668	MSR1
LINC00526	MYC
LINC00667	MYC
LINC00470	NCBP2	NCBP2	4
LINC00667	NCBP2
LINC00668	NCBP2
LINC00907	NCBP2
LINC00470	NF45
LINC00470	NF90
LINC00470	NOLC1
LINC00668	NOLC1
LINC00526	NOTCH2NL
LINC00470	PAPD1
LINC00668	PCBP2
LINC00907	PCBP2
LINC00526	POLR2A	POLR2A	5
LINC00667	POLR2A
LINC01415	POLR2A
LINC01926	POLR2A
LINC02564	POLR2A
LINC00305	POU5F1	POU5F1	4
LINC01387	POU5F1
LINC01538	POU5F1
LINC01919	POU5F1
LINC00667	PPIG	PPIG	3
LINC00668	PPIG
LINC00907	PPIG
LINC00470	PPIL4
LINC00668	PPIL4
LINC00667	PRP17
LINC00470	PRPF8	PRPF8	3
LINC00667	PRPF8
LINC00668	PRPF8
LINC00305	PSF	PSF	3
LINC00470	PSF
LINC00907	PSF
LINC00470	PTBP1
LINC00907	PTBP1
LINC00470	PTEN
LINC00470	PUM1
LINC00470	PUM2
LINC00470	QKI	QKI	3
LINC00667	QKI
LINC00907	QKI
LINC00305	RBBP6
LINC00470	RBFOX2
LINC00668	RBFOX2
LINC00305	RBM10	RBM10	3
LINC00470	RBM10
LINC00907	RBM10
LINC00470	RBM15
LINC00667	RBM15
LINC00470	RBM22
LINC00667	RBM22
LINC00470	RBM39
LINC00668	RBM39
LINC00305	RBM5
LINC00305	RBM6	RBM6	3
LINC00470	RBM6
LINC00667	RBM6
LINC00907	RBM6
LINC00907	RBMX
LINC00526	RELA
LINC00667	RELA
LINC00470	RNC
LINC00667	RNC
LINC00470	RNMT
LINC00470	Ro60
LINC00907	RP1-74B13.2
LINC00907	RP3-394A18
LINC00668	RPS29
LINC00470	RPS3
LINC00907	RRP44
LINC00470	SAFB2
LINC00470	SAP155
LINC00470	SAP49
LINC00667	SAP49
LINC00667	SAP61
LINC00470	SFRS1	SFRS1	3
LINC00667	SFRS1
LINC00907	SFRS1
LINC00470	SFRS7
LINC00667	SFRS7
LINC00667	SLC2A3
LINC00668	SLC7A9
LINC00470	SLTM
LINC00305	SMARCA4	SMARCA4	3
LINC00470	SMARCA4
LINC00907	SMARCA4
LINC00470	SMNDC1
LINC00470	SND1
LINC00668	SND1
LINC00305	SOX2	SOX2	9
LINC00470	SOX2
LINC00668	SOX2
LINC00907	SOX2
LINC01387	SOX2
LINC01917	SOX2
LINC01922	SOX2
LINC01925	SOX2
LINC01926	SOX2
LINC00470	SP1
LINC00907	SP1
LINC00470	SPPL3
LINC00907	SPPL3
LINC01902	SRSF1
LINC01917	SRSF1
LINC00667	SRSF9
LINC00470	SSB
LINC00907	SSB
LINC00668	STAT3
LINC00667	SUGP2
LINC00907	SUGP2
LINC00668	SUZ12
LINC00470	SYAC
LINC00668	SYS1
LINC00470	T2FA
LINC00470	TAF15
LINC00907	TAF15
LINC01910	TAL1
LINC01912	TAL1
LINC00470	TARDBP
LINC00667	TARDBP
LINC00470	TBRG4
LINC01444	TF
LINC00470	TIA1	TIA1	3
LINC00667	TIA1
LINC00668	TIA1
LINC02564	TP53
LINC00470	TRA2A
LINC00526	TRIM23
LINC00470	TRIM25
LINC01917	TRIM25
LINC00526	TRIM27
LINC00470	U2AF1	U2AF1	5
LINC00470	U2AF1
LINC00667	U2AF1
LINC00668	U2AF1
LINC00907	U2AF1
LINC00667	U2AF2
LINC00668	U2AF2
LINC00470	U5S1
LINC00667	U5S1
LINC00668	U5S1
LINC00470	UCHL5	UCHL5	3
LINC00667	UCHL5
LINC00907	UCHL5
LINC00470	UPF1	UPF1	4
LINC00667	UPF1
LINC00668	UPF1
LINC00907	UPF1
LINC00470	USF2
LINC00907	USF2
LINC00526	USHBP1
LINC00668	USP47
LINC00668	VEGFA
LINC00907	VPS26B
LINC00305	WDR33	WDR33	5
LINC00470	WDR33
LINC00667	WDR33
LINC00668	WDR33
LINC00907	WDR33
LINC00907	XPO5
LINC00470	XRCC6
LINC00470	XRN2
LINC00470	YBOX3
LINC00668	YBOX3
LINC00470	YTHDF2
LINC00470	YWHAG
LINC00470	ZC11A	ZC11A	3
LINC00667	ZC11A
LINC00668	ZC11A
LINC00470	ZC3HAV1	ZC3HAV1	3
LINC00526	ZC3HAV1
LINC00907	ZC3HAV1
LINC00470	ZMAT3	ZMAT3	6
LINC00907	ZMAT3
LINC00907	ZMAT3
LINC01387	ZMAT3
LINC01917	ZMAT3
LINC02856	ZMAT3
LINC00470	ZNF131
LINC00470	ZNF622
LINC00470	ZRAB2

## Sheet: interactions with 3 proteins 
Proteins	The number of different lincRNAs interacting with proteins
DBHS	3
EWSR1	3
hnRNPL	3
PPIG	3
PRPF8	3
PSF	3
QKI	3
RBM10	3
RBM6	3
SFRS1	3
SMARCA4	3
TIA1	3
UCHL5	3
ZC11A	3
ZC3HAV1	3
AGO2	4
CSTF2T	4
DDX3X	4
FBL	4
FUS	4
HNF4A	4
hnRNPA2B1	4
hnRNPC	4
hnRNPM	4
HNRNPU	4
IF2B1	4
LSM11	4
MOV10	4
NCBP2	4
POU5F1	4
UPF1	4
POLR2A	5
U2AF1	5
WDR33	5
ZMAT3	6
DHX36	9
IGF2BP1	9
IGF2BP3	9
SOX2	9
ESR1	11
AR	12
FOXA1	21
CTCF	22
H3K4me2	23
H3K4me3	27
H3K4me1	37
H3K27ac	40
H3K27me3	46

## Sheet: NPInter
LINC00305	LINC00470	LINC00526	LINC00667	LINC00668	LINC00907	LINC01254	LINC01255	LINC01387	LINC01415	LINC01416	LINC01443	LINC01444	LINC01477	LINC01478	LINC01538	LINC01539	LINC01541	LINC01543	LINC01544	LINC01601	LINC01630	LINC01882	LINC01887	LINC01892	LINC01894	LINC01895	LINC01897	LINC01899	LINC01900	LINC01901	LINC01902	LINC01903	LINC01904	LINC01905	LINC01906	LINC01908	LINC01909	LINC01910	LINC01912	LINC01915	LINC01916	LINC01917	LINC01919	LINC01922	LINC01924	LINC01925	LINC01926	LINC01928	LINC01929
WDR33	ADAR	DHX36	ELAVL1	WDR33	ADAR			DHX36																							DHX36											TRIM25
RBM5	WDR33	DHX36	WDR33	BUD13	WDR33			SOX2																							SRSF1											DHX36
RBM6	hnRNPA2B1	ZC3HAV1	IGF2BP3	CSTF2T	RBM6			IGF2BP1																							IGF2BP1											AGO2
RBM10	hnRNPM	EZH2	TIA1	FAM120A	RBM10			IGF2BP3																							IGF2BP3											HNRNPM
hnRNPA2B1	CPSF7		FUS	hnRNPC	MOV10			ZMAT3																							FTO											SOX2
FUS	CPSF6		IGF2BP1	LSM11	UPF1			ZMAT3																																		SRSF1
MOV10	CSTF2		AGO2	NCBP2	hnRNPA2B1																																					IGF2BP1
FBL	CPSF5		IGF2BP2	PCBP2	FUS																																					IGF2BP3
DBHS	eIF4AIII		TARDBP	PPIG	BCCIP																																					ZMAT3
PSF	hnRNPC		RBM6	PRPF8	CSTF2
HDAC9	RBM6		MOV10	U5S1	CSTF2T
SMARCA4	RBM10		UPF1	ZC11A	GRWD1
LMBR1L	MOV10		hnRNPA2B1	DDX3X	HNRNPUL1
DHX36	UPF1		BCCIP	FXR1	hnRNPC
SOX2	FUS		CSTF2	GPKOW	hnRNPL
IGF2BP1	hLARP7		CSTF2T	HNRNPU	hnRNPM
IGF2BP3	YWHAG		DDX3X	IF2B1	HNRNPU
	AGGF1		EIF3H	NOLC1	ILF3
	AKAP8L		FAKD2	PPIL4	LSM11
	BUD13		GRWD1	UPF1	MATR3
	CSTF2T		hnRNPC	RBFOX2	NCBP2
	DDX24		hnRNPL	SND1	PCBP2
	DDX3X		hnRNPM	TIA1	PPIG
	DDX42		HNRNPU	U2AF1	PTBP1
	DDX55		IF2B1	U2AF2	QKI
	DDX6		LSM11	YBOX3	TAF15
	DGCR8		NCBP2	RBM39	HNRNPA1
	DHX30		PPIG	EIF2C1	PSF
	EWSR1		PRP17	AGO2	SFRS1
	EXOS5		PRPF8	AGO3	SUGP2
	FAM120A		QKI	AGO4	U2AF1
	FAKD2		RBM15	FBL	UCHL5
	TBRG4		RBM22	MSR1	XPO5
	FMR1		RNC	KLK14	DDX3X
	FTO		HNRNPA1	SYS1	RRP44
	FUBP2		SAP61	SLC7A9	MBNL2
	FXR1		SAP49	C3orf17	SPPL3
	GEMI5		SFRS1	RPS29	FBL
	GPKOW		SFRS7	SOX2	DBHS
	HLTF		SRSF9	IGF2BP1	HDAC9
	HNRNPUL1		SUGP2	IGF2BP3	SMARCA4
	HNRPK		U2AF1		SSB
	hnRNPL		U2AF2		EWSR1
	HNRNPU		U5S1		VPS26B
	IF2B1		UCHL5		AC023347.1
	IF2B2		ZC11A		RP3-394A18
	EIF4G2				ACTR3C
	ILF3				RP1-74B13.2
	KHDR1				DHX36
	LARP4				DHX36
	LIN28B				RBMX
	LSM11				SOX2
	METAP2				EXOSC10
	NCBP2				AGO1
	NOLC1				IGF2BP1
	DBHS				IGF2BP3
	PAPD1				ZC3HAV1
	PPIL4				ZMAT3
	PRPF8				ZMAT3
	PTBP1				CRNKL1
	PUM2				CRNKL1
	QKI				FUBP1
	RBM15				SP1
	RBM22				CPSF1
	TAF15				CPSF7
	RBFOX2				USF2
	RNC				AGO2
	Ro60
	HNRNPA1
	RPS3
	SAFB2
	SAP155
	SAP49
	SLTM
	SND1
	SMNDC1
	SFRS1
	SFRS7
	SYAC
	T2FA
	TARDBP
	TIA1
	TRA2A
	U2AF1
	U2AF2
	U5S1
	UCHL5
	XRCC6
	XRN2
	YBOX3
	ZC11A
	ZNF622
	ZRAB2
	SPPL3
	HNRPG
	FBL
	RNMT
	PSF
	SMARCA4
	SSB
	FUS
	FOXP4
	LINC00310
	TRIM25
	DHX36
	DHX36
	RBM39
	SOX2
	FUBP3
	PUM1
	hnRNPA1
	DDX5
	EXOSC10
	U2AF1
	U2AF1
	AGO1
	YTHDF2
	IGF2BP1
	IGF2BP3
	ZC3HAV1
	ZMAT3
	A1CF
	KHDRBS2
	KHDRBS2
	SP1
	CPSF1
	USF2
	EWSR1
	NF45
	NF90
	ZNF131
[truncated: 15 more columns]

## Sheet: RNAinter
LINC00305	LINC00470	LINC00526	LINC00667	LINC00668	LINC00907	LINC01254	LINC01255	LINC01387	LINC01415	LINC01416	LINC01443	LINC01444	LINC01477	LINC01478	LINC01538	LINC01539	LINC01541	LINC01543	LINC01544	LINC01601	LINC01630	LINC01882	LINC01887	LINC01892	LINC01894	LINC01895	LINC01897	LINC01899	LINC01900	LINC01901	LINC01902	LINC01903	LINC01904	LINC01905	LINC01906	LINC01908	LINC01909	LINC01910	LINC01912	LINC01915	LINC01916	LINC01917	LINC01919	LINC01922	LINC01924	LINC01925	LINC01926	LINC01928	LINC01929
H3K27me3	FOXA1	H3K4me3	H3K4me3	H3K27me3	H3K27me3	H3K27ac	H3K27me3	H3K27me3	H3K4me3	H3K27ac	AR	H3K4me3	H3K27me3	H3K27ac	H3K27me3	H3K27ac	H3K4me3	H3K27ac	H3K27ac		H3K27me3	H3K4me3	H3K27me3	H3K27me3	H3K27ac	H3K27ac		CTCF		H3K4me3		H3K27me3	H3K27me3		H3K4me3	H3K4me1		H3K27ac	H3K27ac	H3K27me3	H3K27me3	H3K27me3	CTCF	H3K27me3	H3K27me3	H3K27ac	H3K27ac	H3K27me3	H3K27me3
H3K4me1	H3K27me3	H3K27ac	H3K27ac	CTCF	H3K27ac	H3K27me3	H3K27ac	H3K27ac	H3K27ac	H3K27me3	H3K27ac	H3K27me3	H3K4me1	H3K4me1	H3K27ac	H3K27me3	H3K27me3	H3K4me1	H3K27me3		H3K27ac	H3K4me1	H3K4me1	CTCF	H3K27me3	H3K4me1		H3K27me3		H3K27ac			H3K4me1		H3K27ac	H3K27me3		H3K4me1	H3K4me1	CTCF		H3K27ac	H3K27me3	H3K27ac	CTCF	H3K27me3	H3K4me1	AR	H3K27ac
AR	H3K27ac	POLR2A	POLR2A	H3K4me1	H3K4me1	H3K4me1	H3K4me1	H3K4me1	H3K4me1	FOXA1	H3K4me1	CTCF	H3K27ac	H3K27me3	H3K4me1	H3K4me1		CTCF	H3K4me1		H3K4me1	H3K27me3	H3K27ac	H3K27ac	H3K4me1	H3K27me3		AR		H3K4me1			H3K27ac		H3K9me3	FOXA1		H3K4me3	H3K4me3	H3K4me1			H3K27ac	H3K4me3	H3K4me1	H3K4me1	H3K4me3	H3K4me3	H3K4me1
POU5F1	H3K4me2	H3K4me1	H3K4me1	H3K27ac	FOXA1	FOXA1	ESR1	CTCF	H3K27me3	AR	ESR1	H3K27ac		H3K4me2	FOXA1	H3K4me2		H3K27me3	H3K4me2		FOXA1	CTCF		H3K4me1	H3K4me2	H3K4me3				H3K27me3			ESR1		H3K27me3	H3K27ac		H3K27me3	H3K27me3	H3K27ac			POU5F1	H3K4me1	H3K27ac	H3K4me3	H3K27me3
		H3K27me3	H3K27me3	H3K4me3	CTCF	H3K4me2	FOXA1	FOXA1	CTCF	H3K4me1	H3K27me3	H3K4me1		FOXA1	H3K4me3	CTCF		H3K4me3			H3K4me3	H3K27ac		H3K4me3	CTCF	H3K4me2				FOXA1			FOXA1		CTCF			H3K4me2	H3K4me2	H3K4me3				H3K4me2		H3K4me2	H3K4me2
		H3K4me2	H3K4me2	FOXA1		H3K4me3		H3K4me3	H3K4me2		H3K4me3	H3K4me2		ESR1	POU5F1						H3K4me2	H3K4me2				CTCF				H3K4me2			H3K4me3					TAL1	TAL1	AR				SOX2		FOXA1	AR
		CTCF	CTCF	AR		CTCF		H3K4me2	POLR2A		FOXA1	TF		AR								ESR1				AR												FOXA1	FOXA1	H3K4me2						CTCF	ESR1
		RELA	RELA	H3K4me2		ESR1		SOX2			H3K4me2											FOXA1																HNF4A	HNF4A	FOXA1						ESR1	FOXA1
		H3K9ac	H3K9ac					POU5F1														GATA6																								AR	CTCF
		MYC	MYC					ESR1																																						SOX2	SOX2
		HNF4A	HNF4A																																												POLR2A
																																															GATA6
[truncated: 15 more columns]

## Sheet: BioGRID
LINC00305	LINC00470	LINC00526	LINC00667	LINC00668	LINC00907	LINC01254	LINC01255	LINC01387	LINC01415	LINC01416	LINC01443	LINC01444	LINC01477	LINC01478	LINC01538	LINC01539	LINC01541	LINC01543	LINC01544	LINC01601	LINC01630	LINC01882	LINC01887	LINC01892	LINC01894	LINC01895	LINC01897	LINC01899	LINC01900	LINC01901	LINC01902	LINC01903	LINC01904	LINC01905	LINC01906	LINC01908	LINC01909	LINC01910	LINC01912	LINC01915	LINC01916	LINC01917	LINC01919	LINC01922	LINC01924	LINC01925	LINC01926	LINC01928	LINC01929
RBBP6	FUS	AES		AGO2
		CCDC57
		KRT31
		NOTCH2NL
		TRIM23
		TRIM27
		USHBP1
[truncated: 15 more columns]
