# Supplementary material for: Long Intergenic Non-Coding RNAs of Human Chromosome 18: Focus on Cancers
Source: Biomedicines. 2024 Feb 28;12(3):544. doi: 10.3390/biomedicines12030544 (PMC10968066; doi:10.3390/biomedicines12030544)
Supplement: Supplementary file 1 [file biomedicines-12-00544-s001.zip › Table_S19_Ershov.xlsx]

## Sheet: data from KM-plotter 
Table S19. Associations of expression lincRNAs of human chromosome 18 in different cancer types: overall and relapse free survival
lincRNAs	HR	p-value	FDR	Cancer type	OS / RFS		OS - overall survival	RFS - relapse free survival
LINC01915	2.58 (1.37 - 4.87)	0.0024	0.5	Uterine corpus endometrial carcinoma	OS		Kaplan-Meier analysis was performed using the KMplotter web-based tool (https://kmplot.com/analysis/)
LINC00526	3 (1.15 - 7.83)	0.0186	over 50%	Bladder Carcinoma	RFS
LINC01477	0.44 (0.21 - 0.91)	0.0233	over 50%	Bladder Carcinoma	RFS
LINC01478	0.42 (0.21 - 0.87)	0.0158	over 50%	Bladder Carcinoma	RFS
LINC01544	0.42 (0.2 - 0.86)	0.0142	over 50%	Bladder Carcinoma	RFS
LINC01900	0.4 (0.19 - 0.84)	0.0128	over 50%	Bladder Carcinoma	RFS
LINC01908	0.43 (0.21 - 0.9)	0.0207	over 50%	Bladder Carcinoma	RFS
LINC01916	0.44 (0.21 - 0.91)	0.0233	over 50%	Bladder Carcinoma	RFS
LINC01917	0.39 (0.18 - 0.85)	0.0137	over 50%	Bladder Carcinoma	RFS
LINC01919	0.43 (0.2 - 0.92)	0.0249	over 50%	Bladder Carcinoma	RFS
LINC01922	0.41 (0.2 - 0.85)	0.0134	over 50%	Bladder Carcinoma	RFS
LINC01925	0.44 (0.21 - 0.92)	0.0256	over 50%	Bladder Carcinoma	RFS
LINC00667	0.55 (0.37 - 0.82)	0.0027	over 50%	Breast cancer	OS
LINC00907	0.39 (0.2 - 0.74)	0.0027	over 50%	Breast cancer	RFS
LINC01444	2.12 (1.4 - 3.22)	0.0003	0.2	Breast cancer	OS
LINC01630	2.08 (1.37 - 3.16)	p<0.001	0.2	Breast cancer	OS
LINC01910	2.24 (1.4 - 3.58)	p<0.001	0.2	Breast cancer	OS
LINC01910	2.13 (1.33 - 3.4)	0.0012	0.5	Breast cancer	RFS
LINC02565	1.96 (1.31 - 2.92)	p<0.001	0.5	Breast cancer	OS
LINC00907	2.83 (1.28 - 6.25)	0.0071	0.5	Cervical squamous cell carcinoma	RFS
LINC01905	0.43 (0.2 - 0.94)	0.0291	over 50%	Cervical squamous cell carcinoma	RFS
LINC01909	0.42 (0.19 - 0.94)	0.0301	over 50%	Cervical squamous cell carcinoma	RFS
LINC01910	2.02 (1.21 - 3.37)	0.0059	over 50%	Cervical squamous cell carcinoma	OS
LINC01929	2.56 (1.52 -4.31)	p<0.001	0.03	Cervical squamous cell carcinoma	OS
LINC01929	4.06 (1.25 - 10.84)	0.0025	0.5	Cervical squamous cell carcinoma	RFS
LINC01254	12.19 (1.22 - 121.8)	0.008	0.1	Esophageal Adenocarcinoma	RFS
LINC01443	0.47 (0.24 - 0.9)	0.0208	over 50%	Esophageal Adenocarcinoma	OS
LINC00305	8.81 (1.16 - 66.59)	0.01	0.2	Esophageal Squamous Cell Carcinoma	RFS
LINC00305	0.33 (0.15 - 0.71)	0.0029	0.2	Head-neck squamous cell carcinoma	RFS
LINC01255	0.33 (0.15-0.71)	p<0.005	0.2	Head-neck squamous cell carcinoma	RFS
LINC01387	0.41 (0.19 - 0.87)	0.0167	over 50%	Head-neck squamous cell carcinoma	RFS
LINC01443	0.28 (0.13 - 0.61)	0.0006	0.03	Head-neck squamous cell carcinoma	RFS
LINC01444	0.35 (0.16 - 0.75)	0.0051	0.2	Head-neck squamous cell carcinoma	RFS
LINC01477	0.33 (0.15 - 0.71)	0.0029	0.2	Head-neck squamous cell carcinoma	RFS
LINC01478	0.28 (0.13 - 0.61)	p<0.001	0.05	Head-neck squamous cell carcinoma	RFS
LINC01538	0.32 (0.15 - 0.69)	0.0022	0.1	Head-neck squamous cell carcinoma	RFS
LINC01541	0.3 (0.14 - 0.66)	0.0014	0.1	Head-neck squamous cell carcinoma	RFS
LINC01630	0.43 (0.2 - 0.94)	0.0286	over 50%	Head-neck squamous cell carcinoma	RFS
LINC01899	0.3 (0.14 - 0.65)	0.0013	0.1	Head-neck squamous cell carcinoma	RFS
LINC01900	0.3 (0.14 - 0.66)	0.0014	0.1	Head-neck squamous cell carcinoma	RFS
LINC01904	0.36 (0.17 - 0.77)	0.0058	over 50%	Head-neck squamous cell carcinoma	RFS
LINC01905	0.3 (0.09 - 1.01)	0.0399	over 50%	Head-neck squamous cell carcinoma	RFS
LINC01908	0.42 (0.2 - 0.89)	0.0205	over 50%	Head-neck squamous cell carcinoma	RFS
LINC01915	2.37 (1.11 - 5.04)	0.0214	over 50%	Head-neck squamous cell carcinoma	RFS
LINC01916	0.33 (0.15 - 0.71)	0.0029	0.2	Head-neck squamous cell carcinoma	RFS
LINC01919	0.34 (0.16 - 0.74)	0.0042	0.2	Head-neck squamous cell carcinoma	RFS
LINC01922	0.31 (0.14 - 0.66)	0.0015	0.1	Head-neck squamous cell carcinoma	RFS
LINC00305	0.42 (0.3-0.58)	p<0.001	0.01	Kidney renal clear cell carcinoma	OS
LINC00526	0.47 (0.34 - 0.66)	<0.001	0.01	Kidney renal clear cell carcinoma	OS
LINC01254	0.39 (0.28 - 0.54)	p<0.001	0.01	Kidney renal clear cell carcinoma	OS
LINC01255	0.39 (0.28-0.55)	p<0.001	0.01	Kidney renal clear cell carcinoma	OS
LINC01387	0.45 (0.32 - 0.62)	p<0.001	0.01	Kidney renal clear cell carcinoma	OS
LINC01415	0.47 (0.34 - 0.64)	p<0.001	0.01	Kidney renal clear cell carcinoma	OS
LINC01443	3.49 (1.11 -11.01)	0.0231	over 50%	Kidney renal clear cell carcinoma	RFS
LINC01477	0.43 (0.31-0.59)	p<0.001	0.01	Kidney renal clear cell carcinoma	OS
LINC01478	0.44 (0.32 - 0.62)	p<0.001	0.01	Kidney renal clear cell carcinoma	OS
LINC01538	0.38 (0.28 - 0.53)	p<0.001	0.01	Kidney renal clear cell carcinoma	OS
LINC01541	0.38 (0.28 - 0.53)	p<0.001	0.01	Kidney renal clear cell carcinoma	OS
LINC01895	0.4 (0.29 - 0.56)	p<0.001	0.01	Kidney renal clear cell carcinoma	OS
LINC01899	0.46 (0.33 - 0.64)	p<0.001	0.01	Kidney renal clear cell carcinoma	OS
LINC01903	0.4 (0.29 - 0.55)	p<0.001	0.01	Kidney renal clear cell carcinoma	OS
LINC01904	0.37 (0.27 - 0.51)	p<0.001	0.01	Kidney renal clear cell carcinoma	OS
LINC01908	0.38 (0.28 - 0.53)	p<0.001	0.01	Kidney renal clear cell carcinoma	OS
LINC01915	0.47 (0.33 - 0.66)	p<0.001	0.01	Kidney renal clear cell carcinoma	OS
LINC01916	0.41 (0.29 - 0.56)	p<0.001	0.01	Kidney renal clear cell carcinoma	OS
LINC01917	0.52 (0.37 - 0.73)	p<0.001	0.03	Kidney renal clear cell carcinoma	OS
LINC01924	0.43 (0.31 - 0.6)	p<0.001	0.01	Kidney renal clear cell carcinoma	OS
LINC01925	0.36 (0.26 - 0.5)	p<0.001	0.01	Kidney renal clear cell carcinoma	OS
LINC01926	0.43 (0.31 - 0.6)	p<0.001	0.01	Kidney renal clear cell carcinoma	OS
LINC01928	0.53 (0.38 - 0.74)	p<0.001	0.03	Kidney renal clear cell carcinoma	OS
LINC02565	0.42 (0.3 - 0.58)	p<0.001	0.01	Kidney renal clear cell carcinoma	OS
LINC00526	0.3 (0.16 - 0.57)	<0.001	0.01	Kidney renal papillary cell carcinoma	OS
LINC00667	0.23 (0.12 - 0.44)	<0.001	0.01	Kidney renal papillary cell carcinoma	OS
LINC01254	0.36 (0.17 - 0.77)	0.0055	over 50%	Kidney renal papillary cell carcinoma	OS
LINC01387	0.48 (0.24 - 0.95)	0.03	over 50%	Kidney renal papillary cell carcinoma	OS
LINC01443	5.36 (1.25 - 22.86)	0.0111	over 50%	Kidney renal papillary cell carcinoma	RFS
LINC01539	3.8 (1.64 - 8.79)	0.0008	0.05	Kidney renal papillary cell carcinoma	RFS
LINC01899	2.56 (1.05 - 6.22)	0.0318	over 50%	Kidney renal papillary cell carcinoma	RFS
LINC01904	0.46 (0.22 - 0.96)	0.0344	over 50%	Kidney renal papillary cell carcinoma	OS
LINC01905	0.43 (0.22 - 0.83)	0.0098	over 50%	Kidney renal papillary cell carcinoma	OS
LINC01909	0.37 (0.19 - 0.7)	0.0015	0.2	Kidney renal papillary cell carcinoma	OS
LINC01910	2.13 (1.12 - 4.03)	0.018	over 50%	Kidney renal papillary cell carcinoma	OS
LINC01910	4.2 (1.25 - 14.14)	0.0118	over 50%	Kidney renal papillary cell carcinoma	RFS
LINC01916	0.44 (0.21 - 0.92)	0.0259	over 50%	Kidney renal papillary cell carcinoma	OS
LINC01917	0.36 (0.18 - 0.74)	0.0039	0.5	Kidney renal papillary cell carcinoma	OS
LINC01919	0.37 (0.18 - 0.75)	0.0041	0.5	Kidney renal papillary cell carcinoma	OS
LINC01926	0.49 (0.24 - 0.99)	0.0414	over 50%	Kidney renal papillary cell carcinoma	OS
LINC01929	2.41 (1.28 - 4.57)	0.0052	0.5	Kidney renal papillary cell carcinoma	OS
LINC01929	3.48 (1.43 - 8.48)	0.0034	0.2	Kidney renal papillary cell carcinoma	RFS
LINC02582	0.49 (0.25 - 0.97)	0.0357	over 50%	Kidney renal papillary cell carcinoma	OS
LINC02582	2.78 (1.23 - 6.31)	0.0104	over 50%	Kidney renal papillary cell carcinoma	RFS
LINC00305	0.36 (0.25 - 0.51)	p<0.001	0.01	Liver hepatocellular carcinoma	OS
LINC00667	1.9 (1.3 - 2.79)	0.0008	0.2	Liver hepatocellular carcinoma	OS
LINC00668	1.95 (1.34 - 2.83)	0.0004	0.05	Liver hepatocellular carcinoma	OS
LINC00907	0.51 (0.31 - 0.85)	0.0081	over 50%	Liver hepatocellular carcinoma	OS
LINC01254	0.4 (0.28 - 0.58)	p<0.001	0.01	Liver hepatocellular carcinoma	OS
LINC01387	0.35 (0.24 - 0.5)	p<0.001	0.01	Liver hepatocellular carcinoma	OS
LINC01415	0.55 (0.38 - 0.8)	0.0013	0.2	Liver hepatocellular carcinoma	OS
LINC01443	0.42 (0.29 - 0.59)	p<0.001	0.01	Liver hepatocellular carcinoma	OS
LINC01477	0.41 (0.29 -0.58)	p<0.001	0.01	Liver hepatocellular carcinoma	OS
LINC01478	0.35 (0.25 - 0.5)	p<0.001	0.01	Liver hepatocellular carcinoma	OS
LINC01538	0.34 (0.24 - 0.48)	p<0.001	0.01	Liver hepatocellular carcinoma	OS
LINC01539	0.42 (0.29 - 0.6)	p<0.001	0.01	Liver hepatocellular carcinoma	OS
LINC01541	0.4 (0.28 - 0.56)	p<0.001	0.01	Liver hepatocellular carcinoma	OS
LINC01541	0.55 (0.4 - 0.77)	0.0003	0.05	Liver hepatocellular carcinoma	RFS
LINC01544	0.44 (0.31 - 0.63)	p<0.001	0.01	Liver hepatocellular carcinoma	OS
LINC01895	0.37 (0.26 - 0.52)	p<0.001	0.01	Liver hepatocellular carcinoma	OS
LINC01899	0.4 (0.28 - 0.57)	p<0.001	0.01	Liver hepatocellular carcinoma	OS
LINC01903	0.35 (0.24 - 0.5)	p<0.001	0.01	Liver hepatocellular carcinoma	OS
LINC01904	0.37 (0.26 - 0.54)	p<0.001	0.01	Liver hepatocellular carcinoma	OS
LINC01908	0.41 (0.28 - 0.58)	p<0.001	0.01	Liver hepatocellular carcinoma	OS
LINC01909	0.56 (0.35 - 0.9)	0.016	over 50%	Liver hepatocellular carcinoma	OS
LINC01910	0.44 (0.3 - 0.63)	p<0.001	0.01	Liver hepatocellular carcinoma	OS
LINC01915	0.56 (0.39 - 0.8)	0.0014	0.2	Liver hepatocellular carcinoma	OS
LINC01916	0.35 (0.25 - 0.51)	p<0.001	0.01	Liver hepatocellular carcinoma	OS
LINC01917	0.36 (0.25 - 0.52)	p<0.001	0.01	Liver hepatocellular carcinoma	OS
LINC01919	0.37 (0.26 - 0.53)	p<0.001	0.01	Liver hepatocellular carcinoma	OS
LINC01922	0.39 (0.27 - 0.55)	p<0.001	0.01	Liver hepatocellular carcinoma	OS
LINC01924	0.36 (0.25 - 0.52)	p<0.001	0.01	Liver hepatocellular carcinoma	OS
LINC01925	0.35 (0.25 - 0.5)	p<0.001	0.01	Liver hepatocellular carcinoma	OS
LINC01926	0.37 (0.26 - 0.53)	p<0.001	0.01	Liver hepatocellular carcinoma	OS
LINC01928	0.39 (0.27 - 0.55)	p<0.001	0.01	Liver hepatocellular carcinoma	OS
LINC02582	0.43 (0.3 - 0.61)	p<0.001	0.01	Liver hepatocellular carcinoma	OS
LINC01255	0.37 (0.26-0.52)	p<0.001	0.01	Liver hepatocellular carcinoma	OS
LINC00907	0.57 (0.42 - 0.78)	0.0003	0.1	Lung adenocarcinoma	OS
LINC01443	0.49 (0.32 - 0.76)	0.0009	0.1	Lung adenocarcinoma	RFS
LINC01905	0.56 (0.37 - 0.87)	0.0079	over 50%	Lung adenocarcinoma	RFS
LINC01254	0.44 (0.24 - 0.79)	0.0046	0.5	Lung squamous cell carcinoma	RFS
LINC01415	0.56 (0.33 - 0.94)	0.0264	over 50%	Lung squamous cell carcinoma	RFS
LINC01443	0.45 (0.21 - 0.94)	0.03	over 50%	Lung squamous cell carcinoma	RFS
LINC01909	0.5 (0.29 - 0.87)	0.0113	over 50%	Lung squamous cell carcinoma	RFS
LINC00470	0.6 (0.41-0.88)	0.007	0.5	Ovarian cancer	RFS
LINC01254	0.56 (0.38 - 0.82)	0.0027	0.2	Ovarian cancer	RFS
LINC01443	1.89 (1.37 - 2.6)	p<0.001	0.02	Ovarian cancer	OS
LINC01538	1.94 (1.43 - 2.63)	p<0.001	0.01	Ovarian cancer	OS
LINC01904	1.94 (1.43 - 2.63)	p<0.001	0.01	Ovarian cancer	OS
LINC00470	0.15 (0.03 - 0.63)	0.0029	0.1	Pancreatic ductal adenocarcinoma	RFS
LINC00526	0.48 (0.31 - 0.74)	<0.001	0.05	Pancreatic ductal adenocarcinoma	OS
LINC01443	2.12 (1.39 - 3.26)	p<0.001	0.03	Pancreatic ductal adenocarcinoma	OS
LINC01538	2.16 (1.27 - 3.65)	0.0035	0.2	Pancreatic ductal adenocarcinoma	OS
LINC01910	2.39 (1.57 - 3.64)	p<0.001	0.01	Pancreatic ductal adenocarcinoma	OS
LINC01916	2.16 (1.27 - 3.65)	0.0035	0.2	Pancreatic ductal adenocarcinoma	OS
LINC01925	2.12 (1.25 - 3.59)	0.0045	0.5	Pancreatic ductal adenocarcinoma	OS
LINC01929	2.01 (1.23 - 3.3)	0.0045	0.5	Pancreatic ductal adenocarcinoma	OS
LINC01443	0.4 (0.19-0.87)	0.017	over 50%	Rectum adenocarcinoma	OS
LINC02582	2.3 (1.46 - 3.62)	p<0.001	0.03	Sarcoma	OS
LINC01416	2.78 (1.46 - 5.32)	0.0012	0.1	Stomach adenocarcinoma	RFS
LINC01444	0.43 (0.22 - 0.84)	0.0113	over 50%	Stomach adenocarcinoma	RFS
LINC01544	2.07 (1.08 - 3.98)	0.0249	over 50%	Stomach adenocarcinoma	RFS
LINC01899	0.48 (0.24 - 0.95)	0.032	over 50%	Stomach adenocarcinoma	RFS
LINC01900	3.3 (1.68 - 6.5)	p<0.001	0.03	Stomach adenocarcinoma	RFS
LINC01910	2.47 (1.29 - 4.72)	0.0047	0.5	Stomach adenocarcinoma	RFS
LINC01922	2.41 (1.26 - 4.63)	0.0063	0.5	Stomach adenocarcinoma	RFS
LINC01926	2.1 (1.1 - 4.01)	0.0218	over 50%	Stomach adenocarcinoma	RFS
LINC01928	0.47 (0.24 - 0.94)	0.0296	over 50%	Stomach adenocarcinoma	RFS
LINC02565	2.37 (1.23 - 4.58)	0.008	over 50%	Stomach adenocarcinoma	RFS
LINC00470	0.08 (0.01 - 0.6)	0.0015	0.1	Testicular Germ Cell Tumor	RFS
LINC01538	0.31 (0.13 - 0.72)	0.0041	0.2	Testicular Germ Cell Tumor	RFS
LINC01539	0.22 (0.05 - 0.96)	0.0274	over 50%	Testicular Germ Cell Tumor	RFS
LINC01895	3.61 (1.56 - 8.34)	0.0013	0.05	Testicular Germ Cell Tumor	RFS
LINC01903	0.36 (0.15 - 0.85)	0.0147	over 50%	Testicular Germ Cell Tumor	RFS
LINC01904	0.31 (0.13 - 0.73)	0.0048	0.2	Testicular Germ Cell Tumor	RFS
LINC01908	0.27 (0.12 - 0.66)	0.0018	0.1	Testicular Germ Cell Tumor	RFS
LINC01915	2.94 (1.2 - 7.21)	0.0137	0.5	Testicular Germ Cell Tumor	RFS
LINC01922	0.22 (0.09 - 0.51)	p<0.001	0.01	Testicular Germ Cell Tumor	RFS
LINC01924	0.27 (0.09 - 0.81)	0.0125	0.5	Testicular Germ Cell Tumor	RFS
LINC01387	0.14 (0.03 - 0.61)	0.0023	0.5	Thyroid carcinoma	OS
LINC01416	0.13 (0.03 -0.59)	0.0018	0.5	Thyroid carcinoma	OS
LINC01478	0.13 (0.03 - 0.58)	0.0017	0.5	Thyroid carcinoma	OS
LINC01539	0.3 (0.14 - 0.68)	0.0023	0.5	Thyroid carcinoma	RFS
LINC01541	0.13 (0.03 - 0.59)	0.0019	0.5	Thyroid carcinoma	OS
LINC01630	0.26 (0.08 - 0.84)	0.0155	over 50%	Thyroid carcinoma	OS
LINC01895	0.13 (0.03 - 0.6)	0.0021	0.5	Thyroid carcinoma	OS
LINC01900	0.22 (0.06 - 0.78)	0.0106	over 50%	Thyroid carcinoma	OS
LINC01905	0.2 (0.06 - 0.63)	0.0024	0.5	Thyroid carcinoma	OS
LINC01908	0.13 (0.03 - 0.6)	0.0021	0.5	Thyroid carcinoma	OS
LINC01909	0.24 (0.07 - 0.87)	0.0179	over 50%	Thyroid carcinoma	OS
LINC01916	0.14 (0.03 - 0.61)	0.0023	0.5	Thyroid carcinoma	OS
LINC01922	0.13 (0.03 - 0.58)	0.0017	0.5	Thyroid carcinoma	OS
LINC01924	0.13 (0.03 - 0.6)	0.0021	0.5	Thyroid carcinoma	OS
LINC01926	0.11 (0.03 - 0.51)	p<0.001	0.2	Thyroid carcinoma	OS
LINC01928	0.14 (0.03 - 0.61)	0.0024	0.5	Thyroid carcinoma	OS
LINC00668	1.99 (1.26 - 3.13)	0.0024	0.5	Uterine corpus endometrial carcinoma	OS
LINC01416	2.74 (1.73 - 4.33)	p<0.001	0.01	Uterine corpus endometrial carcinoma	OS
LINC01443	2.41 (1.56 - 3.73)	p<0.001	0.01	Uterine corpus endometrial carcinoma	OS
LINC01477	2.54 (1.64 - 3.93)	p<0.001	0.01	Uterine corpus endometrial carcinoma	OS
LINC01478	2.55 (1.64 - 3.96)	p<0.001	0.01	Uterine corpus endometrial carcinoma	OS
LINC01538	0.54 (0.32 - 0.91)	0.0184	over 50%	Uterine corpus endometrial carcinoma	RFS
LINC01541	0.49 (0.27 - 0.91)	0.0205	over 50%	Uterine corpus endometrial carcinoma	OS
LINC01544	1.97 (1.24 - 3.15)	0.0036	over 50%	Uterine corpus endometrial carcinoma	OS
LINC01899	2.38 (1.54 - 3.69)	p<0.001	0.02	Uterine corpus endometrial carcinoma	OS
LINC01903	2.08 (1.34 - 3.21)	p<0.001	0.01	Uterine corpus endometrial carcinoma	OS
LINC01904	2.24 (1.45 - 3.46)	p<0.001	0.05	Uterine corpus endometrial carcinoma	OS
LINC01905	2.22 (1.39 - 3.56)	p<0.001	0.2	Uterine corpus endometrial carcinoma	OS
LINC01908	0.37 (0.17 - 0.81)	0.01	over 50%	Uterine corpus endometrial carcinoma	RFS
LINC01909	0.51 (0.3 - 0.88)	0.0127	over 50%	Uterine corpus endometrial carcinoma	RFS
LINC01924	1.9 (1.23 - 2.94)	0.0032	over 50%	Uterine corpus endometrial carcinoma	OS
LINC01926	0.31 (0.15 - 0.66)	0.0013	0.2	Uterine corpus endometrial carcinoma	RFS
LINC01928	2.21 (1.42 - 3.43)	p<0.001	0.1	Uterine corpus endometrial carcinoma	OS
LINC02565	2.17 (1.39 - 3.37)	p<0.001	0.1	Uterine corpus endometrial carcinoma	OS
LINC02582	2.09 (1.35 - 3.22)	p<0.001	0.2	Uterine corpus endometrial carcinoma	OS
LINC00305	2.16 (1.4 - 3.34)	p<0.001	0.1	Uterine corpus endometrial carcinoma	OS
