# Supplementary material for: Long Intergenic Non-Coding RNAs of Human Chromosome 18: Focus on Cancers
Source: Biomedicines. 2024 Feb 28;12(3):544. doi: 10.3390/biomedicines12030544 (PMC10968066; doi:10.3390/biomedicines12030544)
Supplement: Supplementary file 1 [file biomedicines-12-00544-s001.zip › Table_S23_Ershov.xlsx]

## Sheet: Лист1
Table S23. A matrix of multiple pairwise sequence alignment of lincRNAs of human chromosome 18																																All nucleotide sequences were aligned using the T-Coffee online application in matrix-based multiple alignment mode [Madeira F, Pearce M, Tivey ARN, Basutkar P, Lee J, Edbali O, Madhusoodanan N, Kolesnikov A, Lopez R. Search and sequence analysis tools services from EMBL-EBI in 2022. Nucleic Acids Res. 2022 Jul 5;50(W1):W276-W279. doi: 10.1093/nar/gkac240]
	Percent Identity Matrix -0 created by Clustal2.1
			LINC00305	LINC00470	LINC00526	LINC00667	LINC00668	LINC00907	LINC01254	LINC01255	LINC01387	LINC01415	LINC01416	LINC01443	LINC01444	LINC01477	LINC01478	LINC01538	LINC01539	LINC01541	LINC01543	LINC01544	LINC01601	LINC01630	LINC01882	LINC01887	LINC01892	LINC01894	LINC01895	LINC01897	LINC01899	LINC01900	LINC01901	LINC01902	LINC01903	LINC01904	LINC01905	LINC01906	LINC01908	LINC01909	LINC01910	LINC01912	LINC01915	LINC01916	LINC01917	LINC01919	LINC01922	LINC01924	LINC01925
	1	LINC00305	100	51.25	61.87	50.61	42.71	50	47.78	51.28	52.63	42.05	53.72	49.41	48.84	36.23	59.08	43.43	50	51.83	41.79	43.9	55.15	50	42.86	50	54.04	51.52	66.67	54.76	55.45	56.76	57.26	50	51.47	57.63	65.26	60	58.06	36	44.75	52.53	50.93	50	44.74	40.91	50.25	53.36	61.36
	2	LINC00470	51.25	100	51	49.38	55.21	51.05	41.83	43.75	46.34	58.26	40.66	45.96	38.71	50.65	43.75	57.12	45.11	48.92	40.35	44.81	45.54	47.22	54.76	53.7	47.17	50.43	47.17	40.98	44.23	42.22	46.52	46.91	47.83	50	48.44	61.69	50	54.33	48.72	50.39	48.14	56.2	48.37	51.55	52.01	43.2	48.89
	3	LINC00526	61.87	51	100	54.81	51.24	55.27	52	50.72	50	60.94	50.19	53.99	58.06	61.62	56.86	56.49	50.14	51.73	39.68	50.32	54.3	48.33	48.19	55.67	47.8	57.23	57.89	46	51.58	47.54	52.32	49.89	45.93	55.9	53.49	49.32	48.18	46.43	49.42	49.39	50.21	58.43	51.45	53.85	57.35	59.91	64.71
	4	LINC00667	50.61	49.38	54.81	100	52.47	48.64	49.9	53.7	49.19	57.11	52.05	49.1	46.96	55.49	53.18	52.15	51.75	52.16	45.81	47.96	51.61	50.36	44.83	56.67	49.65	49.08	47.62	40.24	50.56	59.65	47.06	48.33	50.21	54.92	68.07	55.2	50	54.17	51.71	47.33	49.06	56.65	50.95	40.52	55.26	58.18	62.14
	5	LINC00668	42.71	55.21	51.24	52.47	100	55.79	48.99	53.03	48.25	55.49	48.7	63.7	35.29	54.03	44.44	53.06	49.31	44.81	48.28	59.21	58.21	45.69	61.81	53.67	56.25	48.44	53.03	36.36	50	50.29	50.83	60	48.08	57.8	48.84	58.54	45.98	56.96	48.35	49.67	47.42	60	54.72	49.09	51.58	48.06	49.51
	6	LINC00907	50	51.05	55.27	48.64	55.79	100	42.42	53.03	55.2	45.51	51.22	57.95	25.53	53.37	50.29	48.36	40.1	49.3	40.32	57.76	63.11	44.96	50	53.04	52.5	52.6	52.5	48.78	53.23	55.9	55.19	55.3	46.89	53.65	54.84	50	52.5	51.04	47.33	52.41	43.79	45.71	50.7	33.33	61.01	54.36	49.46
	7	LINC01254	47.78	41.83	52	49.9	48.99	42.42	100	44.59	41.35	51.42	46.58	49.18	51.22	47.48	51.69	50.67	50.93	50.89	55.16	46.39	56.91	38.94	35.29	52.16	51.96	55.3	50	62.31	57.14	62.22	48.85	44.1	41.9	59.46	60	45.33	41.61	38.52	50.67	47.57	46.46	53.14	45.28	42.86	54.18	55.84	50
	8	LINC01255	51.28	43.75	50.72	53.7	53.03	53.03	44.59	100	50	52.04	45.05	55.88	63.33	45.83	50	50.77	46.34	39.69	46.15	55.14	59.21	50	47.37	52.04	46.38	55.56	58.06	45	62	52.63	47.54	44.97	57	48.72	58.33	57.58	57.14	51.35	55.41	55.29	47.62	60	48.15	52.5	56.32	55.32	63.5
	9	LINC01387	52.63	46.34	50	49.19	48.25	55.2	41.35	50	100	44.96	47.62	47.5	52.94	50	52.14	42.27	45.56	51.59	32	51.9	56.72	44.64	45.16	45.87	51.69	48.96	52.83	45.45	51.35	57.69	49.57	46.07	52.05	50.59	62.07	50	48	45	47.2	52.86	51.81	38.46	39.53	58.62	54.29	54.9	65.96
	10	LINC01415	42.05	58.26	60.94	57.11	55.49	45.51	51.42	52.04	44.96	100	47.28	50.3	31.58	53.43	49	63.44	50.3	48.39	46.6	54.4	42.14	47.29	42.7	58.96	49.3	47.65	46.05	44.07	44	44.26	42.35	56.34	49.81	38.1	50.76	57.42	49.74	53.82	56.63	55.68	55.88	71.53	44.67	48.55	58.3	53.2	57.52
	11	LINC01416	53.72	40.66	50.19	52.05	48.7	51.22	46.58	45.05	47.62	47.28	100	51.37	32.88	51.11	49.47	48.42	48.26	52.9	40	45.55	53.83	42.86	40	51.59	49.42	50.24	52.27	45.31	52.97	50	51.24	49.43	48.39	63.16	54.25	50	42.42	43.55	46.4	50.28	51.88	44.64	43.93	46.25	51.24	50.94	61.74
	12	LINC01443	49.41	45.96	53.99	49.1	63.7	57.95	49.18	55.88	47.5	50.3	51.37	100	46.49	47.55	45.74	49.46	47.04	49.61	39	57.59	53.33	46.53	39.08	53.85	46.88	55.16	45.71	42	51.85	43.75	45.25	63.62	51.71	44.75	52	60.38	48.36	45.88	45.15	50.39	52.38	56.62	42.5	49.02	53.42	51.24	51.85
	13	LINC01444	48.84	38.71	58.06	46.96	35.29	25.53	51.22	63.33	52.94	31.58	32.88	46.49	100	42.11	52.54	48.08	45.92	42.98	41.94	39.2	47.37	53.95	55	48.57	57.89	50	34.78	35	54.55	42.86	54.55	48.81	34.48	52.94	41.38	37.5	33.33	41.86	40	34.62	33.33	37.21	48.72	48.72	56.58	45.61	53.19
	14	LINC01477	36.23	50.65	61.62	55.49	54.03	53.37	47.48	45.83	50	53.43	51.11	47.55	42.11	100	45.32	58.47	45.24	50.73	46.15	41.76	54.17	39.08	48.78	55.06	51.69	58.15	59.38	36.84	63.83	50	50	53.04	48.24	65.22	48.84	50	48.48	51.9	54.23	59.52	51.33	56.97	44.97	55.71	53.02	55.28	62.67
	15	LINC01478	59.08	43.75	56.86	53.18	44.44	50.29	51.69	50	52.14	49	49.47	45.74	52.54	45.32	100	49.53	52.48	50.89	43.33	45.54	56.57	52.05	38.46	49.29	51.99	54.12	41.07	50	53.74	47.06	51.8	48.85	48.07	58.89	57.61	53.33	47.47	47.92	47.85	47.93	49.44	52.21	49.14	41.67	50.33	52.47	48.85
	16	LINC01538	43.43	57.12	56.49	52.15	53.06	48.36	50.67	50.77	42.27	63.44	48.42	49.46	48.08	58.47	49.53	100	47.98	50.57	46.28	43.8	52.43	48.92	41.82	57.52	46.3	41.61	40.74	51.85	57.81	50	43.66	52.54	47.09	55.43	37.14	50.41	48.57	53.85	49.53	52.82	52.53	61.79	44.27	57.14	51.54	52.22	53.41
	17	LINC01539	50	45.11	50.14	51.75	49.31	40.1	50.93	46.34	45.56	50.3	48.26	47.04	45.92	45.24	52.48	47.98	100	51.45	53.23	44.86	56.61	45.66	42.47	53.62	56.42	47.6	44.44	43.41	52.11	41.67	44.79	46.77	51.23	46.59	51.75	56.98	47.44	50.36	51.1	51.75	51.21	56.13	50.71	44.74	49.85	54.71	47.58
	18	LINC01541	51.83	48.92	51.73	52.16	44.81	49.3	50.89	39.69	51.59	48.39	52.9	49.61	42.98	50.73	50.89	50.57	51.45	100	42.86	49.47	53.92	41.46	35.11	52.88	53.15	49.09	50	60.29	53.23	48.48	47.91	45.38	48.16	52.31	58.51	53.33	45.13	54.97	44.89	53.76	49.72	55.2	45.33	47.57	51.94	52.44	49.63
	19	LINC01543	41.79	40.35	39.68	45.81	48.28	40.32	55.16	46.15	32	46.6	40	39	41.94	46.15	43.33	46.28	53.23	42.86	100	38.73	43.53	46.55	37.84	50	50	32.05	26.92	49.12	51.11	48.15	34.57	48.86	34.17	42.86	43.48	50	45.33	56.36	40.46	41.41	45.31	51.55	42.11	20.83	37.08	41.73	38.3
	20	LINC01544	43.9	44.81	50.32	47.96	59.21	57.76	46.39	55.14	51.9	54.4	45.55	57.59	39.2	41.76	45.54	43.8	44.86	49.47	38.73	100	45.37	49.55	50.69	48.94	51.85	51.35	56.49	35.29	48.74	51.72	52.85	53.31	49.33	55.99	51.64	61.29	64.74	47.13	47.66	45.96	48.77	46.15	38.67	46.46	51.26	43.58	56.86
	21	LINC01601	55.15	45.54	54.3	51.61	58.21	63.11	56.91	59.21	56.72	42.14	53.83	53.33	47.37	54.17	56.57	52.43	56.61	53.92	43.53	45.37	100	43.69	42.86	49.55	59.72	63.91	55.17	45.95	60	56.67	51.64	48.96	50	57.63	58.47	59.38	53.47	46.94	51.72	48.94	47.19	46.67	59.09	38.78	52.15	60.65	62.11
	22	LINC01630	50	47.22	48.33	50.36	45.69	44.96	38.94	50	44.64	47.29	42.86	46.53	53.95	39.08	52.05	48.92	45.66	41.46	46.55	49.55	43.69	100	27.59	45.27	55.56	50	51.06	53.57	47.27	50	37.86	54.6	43.83	45.24	58.82	52.94	43.55	47.3	44.9	50.69	42.86	55.43	49	44.44	45.13	47.52	53.19
	23	LINC01882	42.86	54.76	48.19	44.83	61.81	50	35.29	47.37	45.16	42.7	40	39.08	55	48.78	38.46	41.82	42.47	35.11	37.84	50.69	42.86	27.59	100	48	52.94	30.23	60	31.25	55.56	48.21	50.28	43.88	42.86	47.47	7.69	50	28.89	40.91	35	37.04	43.64	44.12	48.48	38.1	44.83	40	32.43
	24	LINC01887	50	53.7	55.67	56.67	53.67	53.04	52.16	52.04	45.87	58.96	51.59	53.85	48.57	55.06	49.29	57.52	53.62	52.88	50	48.94	49.55	45.27	48	100	50.48	51.97	57.69	47.46	57.34	52.08	49.62	50.76	50	51.96	55.43	56.96	54.4	53.38	48.33	51.9	50.93	60.71	46.84	49.5	50.13	54.81	52.38
	25	LINC01892	54.04	47.17	47.8	49.65	56.25	52.5	51.96	46.38	51.69	49.3	49.42	46.88	57.89	51.69	51.99	46.3	56.42	53.15	50	51.85	59.72	55.56	52.94	50.48	100	53.85	39.39	72.97	56.73	56.1	49.62	52.4	47.57	59.09	59.42	62.75	51.33	51.92	49.62	44.83	48.85	41.89	51.43	39.13	45.89	53.89	47.87
	26	LINC01894	51.52	50.43	57.23	49.08	48.44	52.6	55.3	55.56	48.96	47.65	50.24	55.16	50	58.15	54.12	41.61	47.6	49.09	32.05	51.35	63.91	50	30.23	51.97	53.85	100	50	47.17	46.84	44.74	52.34	53.87	55.88	55	54.55	51.79	58.7	48	58.24	51.23	55.33	58.27	44.12	46.03	53.99	54.09	52.17
	27	LINC01895	66.67	47.17	57.89	47.62	53.03	52.5	50	58.06	52.83	46.05	52.27	45.71	34.78	59.38	41.07	40.74	44.44	50	26.92	56.49	55.17	51.06	60	57.69	39.39	50	100	46.67	77.42	57.47	53.28	55.56	38.3	64.64	43.75	21.43	42.86	41.38	37.74	53.16	33.33	39.53	28	33.33	47.52	43.59	54.55
	28	LINC01897	54.76	40.98	46	40.24	36.36	48.78	62.31	45	45.45	44.07	45.31	42	35	36.84	50	51.85	43.41	60.29	49.12	35.29	45.95	53.57	31.25	47.46	72.97	47.17	46.67	100	52	56.25	44.19	55.56	46.3	64.29	54.17	14.29	40.54	34.38	47.17	38	44.64	40	47.83	50	45.45	49.09	32.26
	29	LINC01899	55.45	44.23	51.58	50.56	50	53.23	57.14	62	51.35	44	52.97	51.85	54.55	63.83	53.74	57.81	52.11	53.23	51.11	48.74	60	47.27	55.56	57.34	56.73	46.84	77.42	52	100	63.16	51.9	48.18	52.08	57.89	52	31.58	38.1	37.5	47.06	56.15	59.09	36.96	50	53.12	55.88	47.52	54.93
	30	LINC01900	56.76	42.22	47.54	59.65	50.29	55.9	62.22	52.63	57.69	44.26	50	43.75	42.86	50	47.06	50	41.67	48.48	48.15	51.72	56.67	50	48.21	52.08	56.1	44.74	57.47	56.25	63.16	100	69.71	42.55	44.44	59.29	60	45	35	50	47.92	45.65	52.63	47.83	51.85	50	54.1	65.62	48.57
	31	LINC01901	57.26	46.52	52.32	47.06	50.83	55.19	48.85	47.54	49.57	42.35	51.24	45.25	54.55	50	51.8	43.66	44.79	47.91	34.57	52.85	51.64	37.86	50.28	49.62	49.62	52.34	53.28	44.19	51.9	69.71	100	45.36	49.22	59.06	64.29	58.14	46.46	38.89	47.21	45.64	47.85	44.63	40	38.78	43.87	52.6	56.6
	32	LINC01902	50	46.91	49.89	48.33	60	55.3	44.1	44.97	46.07	56.34	49.43	63.62	48.81	53.04	48.85	52.54	46.77	45.38	48.86	53.31	48.96	54.6	43.88	50.76	52.4	53.87	55.56	55.56	48.18	42.55	45.36	100	51.54	48.82	56.76	44.6	52.73	48.84	50.1	52.15	50.96	49.72	47.95	52.21	53.79	50.3	50.77
	33	LINC01903	51.47	47.83	45.93	50.21	48.08	46.89	41.9	57	52.05	49.81	48.39	51.71	34.48	48.24	48.07	47.09	51.23	48.16	34.17	49.33	50	43.83	42.86	50	47.57	55.88	38.3	46.3	52.08	44.44	49.22	51.54	100	54.12	49.02	56.06	55.29	47.02	48.32	50.17	49.13	49.32	43.21	52.13	46.01	50.64	54.64
	34	LINC01904	57.63	50	55.9	54.92	57.8	53.65	59.46	48.72	50.59	38.1	63.16	44.75	52.94	65.22	58.89	55.43	46.59	52.31	42.86	55.99	57.63	45.24	47.47	51.96	59.09	55	64.64	64.29	57.89	59.29	59.06	48.82	54.12	100	62.16	45	41.51	46.67	50	39.81	55.96	44.16	54.1	41.38	48.26	61.9	65.38
	35	LINC01905	65.26	48.44	53.49	68.07	48.84	54.84	60	58.33	62.07	50.76	54.25	52	41.38	48.84	57.61	37.14	51.75	58.51	43.48	51.64	58.47	58.82	7.69	55.43	59.42	54.55	43.75	54.17	52	60	64.29	56.76	49.02	62.16	100	50	51.16	42.86	47.47	47.01	51.14	42.59	70.59	45.16	58.47	60.4	57.89
	36	LINC01906	60	61.69	49.32	55.2	58.54	50	45.33	57.58	50	57.42	50	60.38	37.5	50	53.33	50.41	56.98	53.33	50	61.29	59.38	52.94	50	56.96	62.75	51.79	21.43	14.29	31.58	45	58.14	44.6	56.06	45	50	100	57.14	63.49	56.79	50	67.27	59.49	48	51.16	46.25	53.85	54.55
	37	LINC01908	58.06	50	48.18	50	45.98	52.5	41.61	57.14	48	49.74	42.42	48.36	33.33	48.48	47.47	48.57	47.44	45.13	45.33	64.74	53.47	43.55	28.89	54.4	51.33	58.7	42.86	40.54	38.1	35	46.46	52.73	55.29	41.51	51.16	57.14	100	50.63	46.78	51.08	51	60	36.36	40.62	50.76	46.21	60.29
	38	LINC01909	36	54.33	46.43	54.17	56.96	51.04	38.52	51.35	45	53.82	43.55	45.88	41.86	51.9	47.92	53.85	50.36	54.97	56.36	47.13	46.94	47.3	40.91	53.38	51.92	48	41.38	34.38	37.5	50	38.89	48.84	47.02	46.67	42.86	63.49	50.63	100	43.81	53.15	50	59.86	60.58	42.86	41.67	40.62	52.5
	39	LINC01910	44.75	48.72	49.42	51.71	48.35	47.33	50.67	55.41	47.2	56.63	46.4	45.15	40	54.23	47.85	49.53	51.1	44.89	40.46	47.66	51.72	44.9	35	48.33	49.62	58.24	37.74	47.17	47.06	47.92	47.21	50.1	48.32	50	47.47	56.79	46.78	43.81	100	48.84	46.2	56.54	49.1	50	46.09	51.21	55.65
	40	LINC01912	52.53	50.39	49.39	47.33	49.67	52.41	47.57	55.29	52.86	55.68	50.28	50.39	34.62	59.52	47.93	52.82	51.75	53.76	41.41	45.96	48.94	50.69	37.04	51.9	44.83	51.23	53.16	38	56.15	45.65	45.64	52.15	50.17	39.81	47.01	50	51.08	53.15	48.84	100	52.78	50.9	49.48	44.05	54.19	57.38	54.44
	41	LINC01915	50.93	48.14	50.21	49.06	47.42	43.79	46.46	47.62	51.81	55.88	51.88	52.38	33.33	51.33	49.44	52.53	51.21	49.72	45.31	48.77	47.19	42.86	43.64	50.93	48.85	55.33	33.33	44.64	59.09	52.63	47.85	50.96	49.13	55.96	51.14	67.27	51	50	46.2	52.78	100	57.23	55.8	54.36	51.28	48.19	51.82
	42	LINC01916	50	56.2	58.43	56.65	60	45.71	53.14	60	38.46	71.53	44.64	56.62	37.21	56.97	52.21	61.79	56.13	55.2	51.55	46.15	46.67	55.43	44.12	60.71	41.89	58.27	39.53	40	36.96	47.83	44.63	49.72	49.32	44.16	42.59	59.49	60	59.86	56.54	50.9	57.23	100	46.15	50	57.07	46.09	62.5
	43	LINC01917	44.74	48.37	51.45	50.95	54.72	50.7	45.28	48.15	39.53	44.67	43.93	42.5	48.72	44.97	49.14	44.27	50.71	45.33	42.11	38.67	59.09	49	48.48	46.84	51.43	44.12	28	47.83	50	51.85	40	47.95	43.21	54.1	70.59	48	36.36	60.58	49.1	49.48	55.8	46.15	100	49.72	48.48	47.19	46.27
	44	LINC01919	40.91	51.55	53.85	40.52	49.09	33.33	42.86	52.5	58.62	48.55	46.25	49.02	48.72	55.71	41.67	57.14	44.74	47.57	20.83	46.46	38.78	44.44	38.1	49.5	39.13	46.03	33.33	50	53.12	50	38.78	52.21	52.13	41.38	45.16	51.16	40.62	42.86	50	44.05	54.36	50	49.72	100	54.55	54.1	66.67
	45	LINC01922	50.25	52.01	57.35	55.26	51.58	61.01	54.18	56.32	54.29	58.3	51.24	53.42	56.58	53.02	50.33	51.54	49.85	51.94	37.08	51.26	52.15	45.13	44.83	50.13	45.89	53.99	47.52	45.45	55.88	54.1	43.87	53.79	46.01	48.26	58.47	46.25	50.76	41.67	46.09	54.19	51.28	57.07	48.48	54.55	100	51.21	55.48
	46	LINC01924	53.36	43.2	59.91	58.18	48.06	54.36	55.84	55.32	54.9	53.2	50.94	51.24	45.61	55.28	52.47	52.22	54.71	52.44	41.73	43.58	60.65	47.52	40	54.81	53.89	54.09	43.59	49.09	47.52	65.62	52.6	50.3	50.64	61.9	60.4	53.85	46.21	40.62	51.21	57.38	48.19	46.09	47.19	54.1	51.21	100	59.81
	47	LINC01925	61.36	48.89	64.71	62.14	49.51	49.46	50	63.5	65.96	57.52	61.74	51.85	53.19	62.67	48.85	53.41	47.58	49.63	38.3	56.86	62.11	53.19	32.43	52.38	47.87	52.17	54.55	32.26	54.93	48.57	56.6	50.77	54.64	65.38	57.89	54.55	60.29	52.5	55.65	54.44	51.82	62.5	46.27	66.67	55.48	59.81	100
	48	LINC01926	42.86	29.41	61.82	51.35	60.78	55.56	45.76	40	33.33	42.35	52.83	58.18	46	57.14	56.1	52.5	53.85	51.61	53.57	50.63	61.29	56	36.84	64.81	57.14	50	66.67	47.06	71.43	33.33	34.15	57.39	50	45.16	43.75	45	42.31	17.39	43.4	55	41.3	40	34.62	40.91	52	58.82	44.74
	49	LINC01928	49.15	41.25	41.27	51.43	46.38	51.47	52.87	50	46.15	54.55	48.35	43.01	28.57	41.67	47.22	42.47	52.59	56.51	26.56	55.08	40.98	55.81	41.18	44.78	53.23	48.98	56.9	50	46.67	36.36	48.1	55.68	53.12	40	52.17	33.33	60.42	42.31	49.32	59.32	40.35	54.05	48.78	34.62	53.41	40	54.17
	50	LINC01929	44.86	50.48	52.06	50.96	48.45	50.41	47.83	56.67	47.41	60.63	43.24	52.17	42.65	54.64	45.62	58.95	48.78	49.76	50.49	43.39	49.51	46.49	42.31	52.49	54.35	45.1	37.93	46.67	52.54	42.86	42.48	48.99	47.29	45.24	52.44	63.46	51.79	52.5	46.42	54.77	52.41	59.22	45.27	47.27	53.31	48.02	52.83
	51	LINC02564	47.92	49.04	58.2	46.39	65.15	64.06	42.99	53.45	43.82	54.55	43.28	58.97	42.86	36.62	47.37	45.92	48.15	44.68	45.45	62.12	44.87	44.66	41.18	53.24	47.69	49.61	45.21	46.43	44.19	51.35	52.11	62.12	51.32	46.09	51.61	45.45	48.15	61.22	48.18	48.84	56.07	53.33	52.63	70.45	49.77	51.75	70.31
	52	LINC02565	38.46	56.19	65.22	51.54	56	58.33	49	59.09	60	62.14	50	49.15	40	63.85	54.69	59.08	47.2	53.95	58.14	46.02	52.5	51.85	56.25	59.78	48.98	46.32	35	59.09	59.26	57.89	37.25	63.3	48.78	43.48	30	45	44.19	59.3	56.67	59.02	48.98	60.19	44.78	64.1	61.96	51.92	52.73
	53	LINC02582	51.32	51.09	58.6	44.4	51.82	53.26	52.91	50	44.64	47.91	47.55	57.83	47.06	59.06	52.03	54.55	50.68	53.65	36.07	46.03	52.17	50.69	43.59	50.26	48.53	58.87	45.16	43.75	51.85	58.82	50.49	49.82	51.55	50.88	45.45	47.56	50	50.62	52.63	51.8	53.69	46.83	55.28	57.77	54.55	46.15	61.73
	54	LINC02837	43.46	48.57	51.32	51.94	63.57	60	51.65	51.19	48.91	52.43	48.25	58.36	41.67	39.23	46.93	45.48	49.88	49.1	42.25	58.26	48.94	51.7	37.61	46.89	47.09	49.66	41.88	42.59	40.91	45.31	48.55	64.17	45.35	45.96	46.07	56.9	57.14	46.92	49.63	51.9	51.83	53.73	45.8	45.45	50	48.43	55.97
	55	LINC02856	57.14	52.73	57.3	49.4	45.36	55.68	50.68	54.55	58.62	47.63	50	53.77	37.84	60.43	48.91	51.4	47.31	50.96	39.02	51.6	56.86	44	34.38	50.64	48.75	62.59	40.91	36.36	53.85	48.15	57.69	43.21	38.46	53.85	64.1	65.63	57.5	48.75	55.26	60	50.9	58.76	55.04	52.46	56.13	55.95	41.51
	56	LINC02864	51.41	42.53	51.39	41.06	42.26	45.39	50.99	35.92	48.1	52.39	47.62	44.95	42.11	52.76	48.56	50.65	46.58	39.88	43.16	43.18	47.97	49.05	30.95	47.98	52.98	47.83	52.08	40.32	45.33	40	42.86	53.36	45.14	54.95	46.3	41.33	56.12	45.99	49.53	44.09	46.13	51.94	42.11	46.51	43.38	49.04	41.6
	57	LINC02879	57.28	43.45	57.35	49.13	48.23	54.55	48.58	54.81	46.39	49.54	49.59	50	44.07	46.39	54.74	42.44	48	53.88	41.28	49.85	52.84	40.3	24.44	49.28	54.09	53.61	60.42	46.94	55.21	47.62	48.04	45.22	49.2	55.07	58.06	42	47.32	46.15	54.69	50.88	46.5	50	47.37	29.41	49.15	53.99	62.04
	58	LINC02958	61.67	41.28	54.24	51.41	52.22	61.97	49.39	45.95	53.85	58.08	47.24	52.6	53.41	54.05	49.54	50	49.67	38.55	48.08	53.85	41.67	52.93	37.5	51.43	40.68	52.27	52.63	47.37	39.13	31.25	46.24	60.38	43.18	49.15	59.38	54	54.17	38.64	43.62	48.11	47.24	54.46	43.59	50	53.5	49.32	50.77
	59	LINC02974	41.07	32.08	45.88	34.39	40	36.21	43.82	41.67	41.3	30.77	30	35	26.32	47.06	34.34	31.94	27.17	35.62	44.12	34.48	33.33	31.91	25	37.5	43.7	38.67	32	30	36.54	50	40.82	40	41	40	37.66	27.27	43.33	40.74	29.41	36.75	37.88	28	29.73	23.33	31.96	36.3	51.67
	60	LINC02979	42.86	33.9	44.7	39.13	50.91	51.18	42.86	27.59	31.37	44.44	40	51.33	26.67	42.62	31.15	29.69	40.43	41.33	30.77	48.65	46.81	44.3	34.62	40.26	42.11	36.36	37.5	30.43	38.46	24	31.33	53.37	32.35	35.19	37.93	31.58	42.86	25.71	31.71	35.85	31.37	29.41	35.71	34.38	41.5	44	40
	61	LINC03035	50.85	43.97	49.57	51.87	46.81	54.17	48.8	52.94	68.18	49.74	42.14	48.67	48.57	55.17	50.8	50.46	50	54.2	31.48	49.17	51.72	43.75	44.44	48.73	53.66	57.02	54.76	50	47.69	61.54	47.73	50.72	53.33	55.77	50.98	40.54	51.72	53.85	52	55.96	45.31	48.61	40	43.48	55.29	54	45.9
	62	LINC03069	48.41	51.26	47.71	55.96	46.11	51.31	50	47.52	50.45	55.59	48.66	46.18	44.71	45.03	53.58	49.38	47.37	47.46	48.76	49.21	44.68	42.35	37.21	51.29	51.49	50.96	35.59	47.17	47.06	34.09	39.63	48.2	48.07	50.51	55.33	52.75	51.46	49.43	47.74	45.39	50.32	45.71	46.63	47.41	47.71	51.4	46.15
	63	LINC03092	43.86	50.68	52.36	47.57	49.79	47.95	46.31	39.58	42.31	53.53	46.12	44.44	42.31	52.93	45.37	51.46	48.53	48.96	46.55	46.96	43.36	41.49	31.11	47.63	48.05	53.28	37.5	39.22	46.05	55.32	42.8	46.7	50.46	53.4	39.76	48.76	50	47.71	47.1	49.48	54.4	52.25	47.68	56.86	47.59	48	56.31
	64	LINC03110	55.56	53.57	50.44	51.79	51.05	54.05	50.53	55.17	35.29	50	62.71	56.05	60.14	46.43	51.39	47.37	46	49.37	41.86	47.06	56.36	50.55	31.91	54.67	35.14	55.77	57.5	42.86	45.83	40.74	43.93	66.1	46.48	45.83	44	48.15	45.95	39.39	45.83	47.92	56.58	47.22	43.9	45.16	52.17	59.32	50
	65	LINC03111	47.22	41.57	56.36	49.55	47.5	59.62	52.13	66.67	45.83	46.4	46.77	49.33	56	53.73	46.88	46.34	54.26	47.97	37.84	46.67	65.12	52.54	37.04	48.42	50.88	60.29	44	51.85	36.84	35.71	53.03	54.55	55.81	51.52	37.84	34.78	56.18	41.3	51.28	49.41	44.74	46.55	37.5	51.43	56.52	56.14	57.14
[truncated: 18 more columns]
